# Supplementary material for: Pre-conditioning with PQQ during pregnancy alleviates LPS-induced placental damage and improves the fetal survival and growth in mice
Source: Front Endocrinol (Lausanne). 2025 Jul 10;16:1617026. doi: 10.3389/fendo.2025.1617026 (PMC12286791; doi:10.3389/fendo.2025.1617026)
Supplement: Supplementary file 2 [file Table1.xlsx]

## Sheet: Sheet1
gene_id	BaseMean_DESeq2	BaseMean_control_Control	BaseMean_case_Case	FoldChange	log2FoldChange	p-value	q-value	Regulation	FPKM_LP1	FPKM_LP2	FPKM_LP3	FPKM_C1	FPKM_C2	FPKM_C3	gene_Dbxref	description	coding_type	pathway	pathway_description	GO_ID	GO_term	wiki_ID	wiki_term	Reactome_ID	Reactome_term	TF_family
0610005C13Rik	117.043	77.6344	156.452	2.01514	1.01088	0.347789	0.659873	Up	0.375021	5.28156	6.95506	1.84669	0.936705	2.77834	71661	RIKEN cDNA 0610005C13 gene	non_coding			GO:0003674,GO:0005575,GO:0008150	molecular_function|cellular_component|biological_process
0610009B22Rik	428.541	424.724	432.357	1.01797	0.025697	0.892669	0.962623	Up	8.3493	9.99959	10.4085	8.67078	7.21338	9.14392	66050	RIKEN cDNA 0610009B22 gene	protein_coding			GO:0001222,GO:0005634,GO:0005640,GO:0005654,GO:0005737,GO:0005783,GO:0006888,GO:0030008,GO:0043231,GO:0044325,GO:0048471,GO:0140416	transcription corepressor binding|nucleus|nuclear outer membrane|nucleoplasm|cytoplasm|endoplasmic reticulum|endoplasmic reticulum to Golgi vesicle-mediated transport|TRAPP complex|intracellular membrane-bounded organelle|transmembrane transporter binding|perinuclear region of cytoplasm|transcription regulator inhibitor activity			R-MMU-199977,R-MMU-199991,R-MMU-204005,R-MMU-392499,R-MMU-446203,R-MMU-5653656,R-MMU-597592,R-MMU-8876198,R-MMU-9007101,R-MMU-948021	ER to Golgi Anterograde Transport|Membrane Trafficking|COPII-mediated vesicle transport|Metabolism of proteins|Asparagine N-linked glycosylation|Vesicle-mediated transport|Post-translational protein modification|RAB GEFs exchange GTP for GDP on RABs|Rab regulation of trafficking|Transport to the Golgi and subsequent modification
0610009E02Rik	17.7946	13.2962	22.293	1.67538	0.744489	0.229397	0.543923	Up	0.38404	0.347793	0.560243	0.251501	0.294393	0.13583	100125929	RIKEN cDNA 0610009E02 gene	non_coding			GO:0003674,GO:0005575,GO:0008150	molecular_function|cellular_component|biological_process
0610009L18Rik	24.3028	25.1326	23.473	0.933412	-0.0994134	0.850333	0.945199	Down	0.89219	1.00561	1.55914	1.32908	0.898874	1.03683	66838	RIKEN cDNA 0610009L18 gene	non_coding			GO:0003674,GO:0005575,GO:0008150	molecular_function|cellular_component|biological_process
0610010K14Rik	711.263	737.686	684.84	0.928332	-0.107287	0.556917	0.80796	Down	18.2829	23.0206	22.1214	18.6984	18.3703	23.5833	104457	RIKEN cDNA 0610010K14 gene	protein_coding	mmu03082	ATP-dependent chromatin remodeling	GO:0003674,GO:0003677,GO:0005634,GO:0005654,GO:0005829,GO:0006325,GO:0008150,GO:0016589,GO:0042802,GO:0071339	molecular_function|DNA binding|nucleus|nucleoplasm|cytosol|chromatin organization|biological_process|NURF complex|identical protein binding|MLL1 complex
0610025J13Rik	3.60849	3.80617	3.4108	0.898963	-0.153667	0.90871	0.968947	Down	0.121752	0.025616	0.0141844	0.0626961	0.0477026	0.0471631	78687	RIKEN cDNA 0610025J13 gene	non_coding			GO:0003674,GO:0005575,GO:0008150	molecular_function|cellular_component|biological_process
0610030E20Rik	1589.04	1622.92	1555.16	0.958229	-0.0615579	0.596194	0.826408	Down	10.2225	8.58699	9.57048	8.14209	9.05807	9.02292	68364	RIKEN cDNA 0610030E20 gene	protein_coding			GO:0003674,GO:0005575,GO:0008150	molecular_function|cellular_component|biological_process
0610038B21Rik	15.9159	17.9028	13.929	0.777641	-0.362824	0.685647	0.872884	Down	0.224477	0.212531	0.398318	0.300102	0.0405926	0.602003	70345	RIKEN cDNA 0610038B21 gene	non_coding			GO:0003674,GO:0005575,GO:0008150	molecular_function|cellular_component|biological_process
0610039K10Rik	1.78256	1.50598	2.05915	1.35905	0.442603	0.816414	0.930679	Up	0.0276534	0.0261817	0.144976	0	0.0650079	0.0642728	68386	RIKEN cDNA 0610039K10 gene	non_coding			GO:0003674,GO:0005575,GO:0008150	molecular_function|cellular_component|biological_process
0610040B10Rik	33.2991	37.1981	29.4001	0.7901	-0.339893	0.411792	0.71276	Down	2.15168	1.81082	2.13075	2.07752	2.5291	2.22267	67672	RIKEN cDNA 0610040B10 gene	non_coding			GO:0003674,GO:0005575,GO:0008150	molecular_function|cellular_component|biological_process
0610040F04Rik	8.8032	7.94024	9.66616	1.21411	0.279899	0.793992	0.922796	Up	0.0989073	0.0312145	0.241982	0.0254662	0.0775042	0.166027	75394	RIKEN cDNA 0610040F04 gene	non_coding			GO:0003674,GO:0005575,GO:0008150	molecular_function|cellular_component|biological_process
0610040J01Rik	80.6051	69.467	91.7432	1.32023	0.400785	0.503173	0.77599	Up	0.292204	1.60459	1.78928	0.650033	0.65944	1.18172	76261	RIKEN cDNA 0610040J01 gene	protein_coding			GO:0003674,GO:0008150	molecular_function|biological_process
0610043K17Rik	2.5653	3.41559	1.71501	0.502996	-0.99138	0.551291	0.803477	Down	0	0.201446	0.0446189	0.147914	0.200073	0.0989052	68400	RIKEN cDNA 0610043K17 gene	non_coding			GO:0003674,GO:0005575,GO:0008150	molecular_function|cellular_component|biological_process
1110002E22Rik	23.8155	20.7874	26.8436	1.29145	0.368987	0.591691	0.82433	Up	0.0908406	0.113832	0.0420214	0.0371476	0.103634	0.0310492	102634333	RIKEN cDNA 1110002E22 gene	protein_coding			GO:0003674,GO:0005575,GO:0008150	molecular_function|cellular_component|biological_process
1110002J07Rik	5.41097	3.80911	7.01284	1.83971	0.879476	0.545075	0.801651	Up	0.0102448	0.0872961	0.150387	0.03561	0	0.0833393	68488	RIKEN cDNA 1110002J07 gene	non_coding			GO:0003674,GO:0005575,GO:0008150	molecular_function|cellular_component|biological_process
1110002L01Rik	587.032	678.803	495.261	0.729493	-0.455034	0.00124941	0.0158898	Down	4.73371	4.12716	4.82135	5.03222	5.78884	5.7882	100043040	RIKEN cDNA 1110002L01 gene	non_coding			GO:0003674,GO:0005575,GO:0008150	molecular_function|cellular_component|biological_process
1110004F10Rik	2849.58	2798.72	2900.45	1.03638	0.0515577	0.637186	0.849121	Up	49.6376	49.5366	46.3884	39.798	41.2775	43.4742	56372	RIKEN cDNA 1110004F10 gene	protein_coding			GO:0003674,GO:0005575,GO:0008150	molecular_function|cellular_component|biological_process
1110006O24Rik	18.5097	20.0579	16.9615	0.845345	-0.242388	0.713635	0.886527	Down	0.993037	0.421464	0.610372	0.515774	1.12697	0.477527	66123	RIKEN cDNA 1110006O24 gene	non_coding
1110017D15Rik	19.4503	22.7807	16.1199	0.707652	-0.498888	0.426176	0.722705	Down	0.11229	0.308311	0.200156	0.260208	0.316768	0.20879	73721	RIKEN cDNA 1110017D15 gene	protein_coding			GO:0002177,GO:0005634,GO:0005654,GO:0005737,GO:0005739,GO:0005829,GO:0005856,GO:0007283,GO:0030154,GO:0043014,GO:0048471,GO:0065003,GO:0097225	manchette|nucleus|nucleoplasm|cytoplasm|mitochondrion|cytosol|cytoskeleton|spermatogenesis|cell differentiation|alpha-tubulin binding|perinuclear region of cytoplasm|protein-containing complex assembly|sperm midpiece
1110018N20Rik	20.1275	28.4333	11.8217	0.415559	-1.26688	0.0503881	0.226395	Down	0.0485737	0.0270521	0.0419429	0.0496583	0.0638108	0.13614	68941	RIKEN cDNA 1110018N20 gene	non_coding			GO:0003674,GO:0005575,GO:0008150	molecular_function|cellular_component|biological_process
1110019D14Rik	108.478	98.9127	118.044	1.19264	0.254155	0.390333	0.696585	Up	2.24712	2.24388	2.6875	1.24078	1.96033	2.14218	76311	RIKEN cDNA 1110019D14 gene	non_coding			GO:0003674,GO:0005575,GO:0008150	molecular_function|cellular_component|biological_process
1110020A21Rik	11.4427	11.751	11.1343	0.948628	-0.0760862	0.922765	0.974203	Down	0.280228	0.408177	0.135612	0.17483	0.253371	0.350708	68531	RIKEN cDNA 1110020A21 gene	non_coding			GO:0003674,GO:0005575,GO:0008150	molecular_function|cellular_component|biological_process
1110025M09Rik	26.6936	28.813	24.5742	0.851848	-0.231331	0.634525	0.847247	Down	0.280391	0.309714	0.404246	0.284263	0.439432	0.31227	68635	RIKEN cDNA 1110025M09 gene	protein_coding			GO:0003674,GO:0005575,GO:0008150	molecular_function|cellular_component|biological_process
1110028F11Rik	7.79249	7.22006	8.36492	1.15838	0.212106	0.81489	0.930402	Up	0.077777	0.101252	0.101939	0.0563222	0.0342824	0.124281	68690	RIKEN cDNA 1110028F11 gene	non_coding			GO:0003674,GO:0005575,GO:0008150	molecular_function|cellular_component|biological_process
1110028F18Rik	1.46032	2.63735	0.283282	0.117331	-3.09135	0.236202	0.551758	Down	0	0.0185673	0	0	0.0691527	0.0911609	68692	RIKEN cDNA 1110028F18 gene	non_coding			GO:0003674,GO:0005575,GO:0008150	molecular_function|cellular_component|biological_process
1110032F04Rik	17.2927	21.4257	13.1596	0.613495	-0.704877	0.408416	0.710229	Down	0.0373955	0.123919	0.264668	0.357455	0.120876	0.130373	68725	RIKEN cDNA 1110032F04 gene	protein_coding			GO:0003674,GO:0005575,GO:0008150,GO:0016020	molecular_function|cellular_component|biological_process|membrane
1110038B12Rik	242.639	225.284	259.995	1.15389	0.206508	0.345211	0.658089	Up	13.372	11.9008	14.9089	9.45096	8.85425	12.4837	68763	RIKEN cDNA 1110038B12 gene	non_coding			GO:0003674,GO:0005575,GO:0008150	molecular_function|cellular_component|biological_process
1110038F14Rik	465.42	434.421	496.419	1.14278	0.192545	0.208002	0.517336	Up	9.54978	9.40996	8.89115	6.61255	7.12751	7.87595	117171	RIKEN cDNA 1110038F14 gene	protein_coding			GO:0003674,GO:0005575,GO:0008150	molecular_function|cellular_component|biological_process
1110046J04Rik	73.9166	75.1496	72.6837	0.96746	-0.0477258	0.880735	0.95845	Down	3.41845	2.65972	2.4487	2.19606	2.5461	3.06797	68808	RIKEN cDNA 1110046J04 gene	non_coding			GO:0003674,GO:0005575,GO:0008150	molecular_function|cellular_component|biological_process
1110059E24Rik	378.539	320.611	436.467	1.36173	0.445436	0.0414862	0.201106	Up	10.6262	10.1478	7.00948	5.73986	5.77963	6.59174	66206	RIKEN cDNA 1110059E24 gene	protein_coding			GO:0003674,GO:0005575,GO:0008150	molecular_function|cellular_component|biological_process
1110059G10Rik	559.867	609.192	510.541	0.837879	-0.255186	0.0903672	0.32664	Down	4.5539	4.11893	5.17688	4.58732	4.85604	5.18303	66202	RIKEN cDNA 1110059G10 gene	protein_coding			GO:0003674,GO:0005575,GO:0008150	molecular_function|cellular_component|biological_process
1110065P20Rik	375.51	351.922	399.097	1.13384	0.181216	0.315085	0.633119	Up	12.5801	13.9808	14.7922	9.47426	10.5971	12.2873	68920	RIKEN cDNA 1110065P20 gene	protein_coding			GO:0003674,GO:0005575,GO:0008150	molecular_function|cellular_component|biological_process
1300002E11Rik	167.736	163.399	172.072	1.05358	0.0752998	0.735011	0.895336	Up	1.46766	1.35812	1.12805	1.13879	1.13966	1.04959	100043489	RIKEN cDNA 1300002E11 gene	non_coding			GO:0003674,GO:0005575,GO:0008150	molecular_function|cellular_component|biological_process
1500002C15Rik	6.68456	9.09099	4.27814	0.471544	-1.08453	0.297075	0.616025	Down	0.52076	1.10935	0.273015	1.0559	1.98934	0.605182	102636313	RIKEN cDNA 1500002C15 gene	non_coding			GO:0003674,GO:0005575,GO:0008150	molecular_function|cellular_component|biological_process
1500002F19Rik	8.37706	8.71932	8.03481	0.921836	-0.117418	0.883929	0.960147	Down	0.049165	0.0512033	0.0360855	0.0341787	0.05201	0.0457083	76683	RIKEN cDNA 1500002F19 gene	non_coding			GO:0003674,GO:0005575,GO:0009617	molecular_function|cellular_component|response to bacterium
1500004A13Rik	8.56606	7.1288	10.0033	1.40177	0.487252	0.701719	0.880935	Up	0.0292448	0.072682	0.0229979	0	0.068749	0.0127447	319830	RIKEN cDNA 1500004A13 gene	non_coding			GO:0003674,GO:0005575,GO:0008150	molecular_function|cellular_component|biological_process
1500009L16Rik	489.937	320.558	659.315	2.05715	1.04065	8.15809e-05	0.0017572	Up	15.069	17.3725	11.4506	7.39962	7.23455	4.32752	69784	RIKEN cDNA 1500009L16 gene	protein_coding			GO:0003674,GO:0005575,GO:0008150	molecular_function|cellular_component|biological_process
1500011B03Rik	250.799	233.902	267.696	1.14465	0.194913	0.32268	0.640789	Up	4.55193	5.19739	4.23369	3.32913	3.67949	3.84877	66236	RIKEN cDNA 1500011B03 gene	non_coding			GO:0003674,GO:0005575,GO:0008150	molecular_function|cellular_component|biological_process
1500015A07Rik	75.1251	67.903	82.3473	1.21244	0.27791	0.380538	0.688735	Up	1.63572	1.06804	1.33067	0.833237	1.12706	0.983218	68982	RIKEN cDNA 1500015A07 gene	non_coding			GO:0003674,GO:0005575,GO:0008150	molecular_function|cellular_component|biological_process
1500015L24Rik	1.18558	0.374603	1.99656	4.89612	2.29164	0.338752	0.652945	Up	0.13521	0.0640072	0.0354428	0	0.0397317	0	68994	RIKEN cDNA 1500015L24 gene	non_coding			GO:0003674,GO:0005575,GO:0008150	molecular_function|cellular_component|biological_process
1500026H17Rik	12.1713	13.997	10.3457	0.738896	-0.436558	0.570487	0.81334	Down	0.112645	0.10665	0.0908549	0.0501982	0.122219	0.201395	69002	RIKEN cDNA 1500026H17 gene	non_coding			GO:0003674,GO:0005575,GO:0008150	molecular_function|cellular_component|biological_process
1600002D24Rik	2.89392	3.80617	1.98167	0.523209	-0.934542	0.53496	0.796002	Down	0.0356186	0.0449639	0	0.0550254	0.0418663	0.0413928	69776	RIKEN cDNA 1600002D24 gene	non_coding			GO:0003674,GO:0005575,GO:0008150	molecular_function|cellular_component|biological_process
1600010M07Rik	4.63144	8.39815	0.864734	0.103011	-3.27913	0.013606	0.0948238	Down	0.0426921	0.0404201	0.0447637	0.544113	0.250903	0.297679	69781	RIKEN cDNA 1600010M07 gene	non_coding			GO:0003674,GO:0005575,GO:0008150	molecular_function|cellular_component|biological_process
1600012H06Rik	1909.58	1867.55	1951.62	1.04501	0.0635228	0.573495	0.814685	Up	22.9109	20.6888	20.901	16.6946	19.0784	18.9403	67912	RIKEN cDNA 1600012H06 gene	protein_coding			GO:0003674,GO:0005576,GO:0006915,GO:0008150	molecular_function|extracellular region|apoptotic process|biological_process			R-MMU-168249,R-MMU-168256,R-MMU-6798695	Innate Immune System|Immune System|Neutrophil degranulation
1600012P17Rik	112467	146383	78550	0.536606	-0.898065	1.80287e-05	0.000509165	Down	1004.46	1115.15	762.712	1708.01	1868.92	1198.42	72025	RIKEN cDNA 1600012P17 gene	non_coding			GO:0003674,GO:0005575,GO:0008150	molecular_function|cellular_component|biological_process
1600014C10Rik	1970.16	1770.67	2169.66	1.22534	0.293184	0.0913223	0.328348	Up	17.5322	20.1685	19.4211	12.9364	11.7092	16.6926	72244	RIKEN cDNA 1600014C10 gene	protein_coding			GO:0003674,GO:0005737,GO:0005739,GO:0005783,GO:0005829,GO:0006914,GO:0006915,GO:0006979,GO:0016020,GO:0031966,GO:0051560	molecular_function|cytoplasm|mitochondrion|endoplasmic reticulum|cytosol|autophagy|apoptotic process|response to oxidative stress|membrane|mitochondrial membrane|mitochondrial calcium ion homeostasis
1600014C23Rik	1.31111	2.62222	0	0.0606053	-4.04441	0.295585	0.614458	Down	0	0	0	0	0.357651	0	72240	RIKEN cDNA 1600014C23 gene	protein_coding			GO:0003674,GO:0005575,GO:0008150	molecular_function|cellular_component|biological_process
1600015H23Rik	23.5215	25.7859	21.2571	0.82453	-0.278355	0.606548	0.833111	Down	1.18005	1.03745	0.883797	1.02544	1.58519	0.734656	105243551	RIKEN cDNA 1600015H23 gene	non_coding			GO:0003674,GO:0005575,GO:0008150	molecular_function|cellular_component|biological_process
1600019K03Rik	39.5002	69.4878	9.5125	0.136815	-2.8697	5.57294e-06	0.000188922	Down	0.551328	0.626385	0.635889	1.2137	5.05467	5.57415	69768	RIKEN cDNA 1600019K03 gene	non_coding			GO:0003674,GO:0005575,GO:0008150	molecular_function|cellular_component|biological_process
1600020E01Rik	137.551	126.319	148.784	1.17694	0.235039	0.492816	0.768634	Up	5.02025	4.89932	10.0418	4.1164	5.49231	5.38532	72012	RIKEN cDNA 1600020E01 gene	non_coding			GO:0003674,GO:0005575,GO:0008150	molecular_function|cellular_component|biological_process
1600023N17Rik	5.03577	4.89717	5.17438	1.05502	0.077269	0.948057	0.983665	Up	0.0782689	0.247012	0.136778	0.0302285	0.245328	0.121277	69788	RIKEN cDNA 1600023N17 gene	non_coding			GO:0003674,GO:0005575,GO:0008150	molecular_function|cellular_component|biological_process
1600025M17Rik	1164.15	1184.98	1143.32	0.964946	-0.0514802	0.803516	0.926691	Down	74.8566	69.1431	46.0247	51.3038	61.1444	62.5202	72030	RIKEN cDNA 1600025M17 gene	non_coding			GO:0003674,GO:0005575,GO:0008150	molecular_function|cellular_component|biological_process
1600029I14Rik	8.66864	8.68821	8.64907	0.994263	-0.00830077	0.993001	0.99793	Down	0.182628	0.403453	0.319149	0.176333	0.536654	0.106117	69797	RIKEN cDNA 1600029I14 gene	non_coding			GO:0003674,GO:0005575,GO:0008150	molecular_function|cellular_component|biological_process
1700001C19Rik	24.8264	33.5215	16.1313	0.481482	-1.05445	0.0390424	0.193487	Down	0.252358	0.238928	0.250677	0.554006	0.327847	0.478491	75462	RIKEN cDNA 1700001C19 gene	protein_coding			GO:0003674,GO:0005575,GO:0008150	molecular_function|cellular_component|biological_process
1700001G11Rik	5.81752	3.4606	8.17444	2.36665	1.24285	0.308065	0.625324	Up	0.204657	0.193765	0.572233	0.276644	0.0400924	0.039639	69303	RIKEN cDNA 1700001G11 gene	non_coding			GO:0003674,GO:0005575,GO:0008150	molecular_function|cellular_component|biological_process
1700001G17Rik	2.99858	4.56673	1.43043	0.314152	-1.67047	0.238591	0.554287	Down	0.0887459	0.0280076	0.0310174	0.137099	0.0695417	0.206266	67503	RIKEN cDNA 1700001G17 gene	non_coding			GO:0003674,GO:0005575,GO:0008150	molecular_function|cellular_component|biological_process
1700001J03Rik	4.53421	3.01659	6.05183	2.00116	1.00083	0.401441	0.705534	Up	0.0997662	0.0377827	0.0732251	0.0115593	0.0586329	0.0231879	69282	RIKEN cDNA 1700001J03 gene	protein_coding			GO:0003674,GO:0005575,GO:0008150	molecular_function|cellular_component|biological_process
1700001L05Rik	251.218	288.432	214.004	0.7417	-0.431091	0.223223	0.537064	Down	0.692177	1.04937	1.50206	0.974563	1.02986	1.87351	69291	RIKEN cDNA 1700001L05 gene	non_coding			GO:0003674,GO:0005575,GO:0008150	molecular_function|cellular_component|biological_process
1700001O22Rik	55.7394	36.9249	74.5539	2.02117	1.01519	0.0318965	0.170016	Up	1.3993	0.869738	0.492801	0.470297	0.326439	0.409641	73598	RIKEN cDNA 1700001O22 gene	protein_coding			GO:0003674,GO:0005575,GO:0008150	molecular_function|cellular_component|biological_process
1700001P01Rik	8.86102	11.4635	6.25851	0.547919	-0.867966	0.358253	0.66909	Down	0.421448	0.399019	0.0883797	0.78129	0.297224	0.391817	72215	RIKEN cDNA 1700001P01 gene	protein_coding			GO:0003674,GO:0005575,GO:0008150	molecular_function|cellular_component|biological_process
1700003E16Rik	1.65372	3.02415	0.283282	0.102341	-3.28855	0.133716	0.406506	Down	0	0.0121457	0	0.0148636	0.045236	0.0596326	71837	RIKEN cDNA 1700003E16 gene	protein_coding			GO:0003674,GO:0005575,GO:0008150	molecular_function|cellular_component|biological_process
1700003F12Rik	4.42025	6.82863	2.01188	0.29477	-1.76234	0.185398	0.488093	Down	0.135909	0.032169	0.0712518	0.118102	0.0798741	0.51331	75480	RIKEN cDNA 1700003F12 gene	protein_coding			GO:0003674,GO:0005575,GO:0008150	molecular_function|cellular_component|biological_process
1700003G18Rik	1.79624	0.761404	2.83108	3.72832	1.89853	0.386977	0.693099	Up	0.169667	0.240956	0	0.0491457	0.0498569	0	69350	RIKEN cDNA 1700003G18 gene	non_coding			GO:0003674,GO:0005575,GO:0008150	molecular_function|cellular_component|biological_process
1700003M07Rik	4.77601	2.66175	6.89026	2.59029	1.37311	0.314179	0.632188	Up	0.01136	0.182842	0.0714673	0.0263242	0.0133526	0.0528064	72225	RIKEN cDNA 1700003M07 gene	non_coding			GO:0003674,GO:0005575,GO:0008150	molecular_function|cellular_component|biological_process
1700007L15Rik	19.9944	18.9716	21.0172	1.10767	0.147525	0.816398	0.930679	Up	1.19698	0.533307	0.849013	0.693434	0.993133	0.368213	100502742	RIKEN cDNA 1700007L15 gene	non_coding
1700008J07Rik	45.9379	38.7137	53.162	1.37238	0.456681	0.274429	0.593117	Up	0.475793	0.726897	0.782335	0.35081	0.394017	0.540359	629159	RIKEN cDNA 1700008J07 gene	non_coding			GO:0003674,GO:0005575,GO:0008150	molecular_function|cellular_component|biological_process
1700008O03Rik	1.55997	1.12381	1.99613	1.77225	0.825586	0.716453	0.887814	Up	0.0501494	0.0094961	0.0105166	0	0.0353676	0	69349	RIKEN cDNA 1700008O03 gene	protein_coding			GO:0003674,GO:0005575,GO:0008150	molecular_function|cellular_component|biological_process
1700010G06Rik	3.06719	3.82216	2.31222	0.605169	-0.72459	0.646748	0.853623	Down	0	0.0434231	0.0288536	0.0531397	0.0107817	0.0426393	115488511	RIKEN cDNA 1700010G06 gene	non_coding			GO:0003674,GO:0005575,GO:0008150	molecular_function|cellular_component|biological_process
1700010I14Rik	22.8028	14.1758	31.4299	2.22131	1.15141	0.0867393	0.318955	Up	0.476115	0.503809	0.543267	0.389397	0.115218	0.0976412	66931	RIKEN cDNA 1700010I14 gene	protein_coding			GO:0003674,GO:0005575,GO:0008150	molecular_function|cellular_component|biological_process
1700012D01Rik	24.1414	26.2884	21.9944	0.836411	-0.257716	0.62318	0.841733	Down	0.870306	0.788163	1.22994	1.27142	0.756103	1.01139	72243	RIKEN cDNA 1700012D01 gene	non_coding			GO:0003674,GO:0005575,GO:0008150	molecular_function|cellular_component|biological_process
1700013H16Rik	3.59887	7.19775	0	0.0220893	-5.50051	0.0293182	0.160823	Down	0	0	0	0.0223717	0	0.403899	75514	RIKEN cDNA 1700013H16 gene	protein_coding			GO:0000785,GO:0000795,GO:0001741,GO:0005515,GO:0005634,GO:0005730,GO:0007286,GO:0051321	chromatin|synaptonemal complex|XY body|protein binding|nucleus|nucleolus|spermatid development|meiotic cell cycle
1700016A09Rik	2.81268	3.04562	2.57975	0.848148	-0.237612	0.884982	0.960507	Down	0.031495	0.178913	0.0660466	0.145966	0.148078	0	74227	RIKEN cDNA 1700016A09 gene	non_coding			GO:0003674,GO:0005575,GO:0008150	molecular_function|cellular_component|biological_process
1700016C15Rik	2.31635	2.27495	2.35775	1.03131	0.0444843	0.978533	0.993629	Up	0.0258842	0.0245067	0.162841	0.0299905	0.0304245	0.120322	69428	RIKEN cDNA 1700016C15 gene	protein_coding			GO:0003674,GO:0005575,GO:0008150	molecular_function|cellular_component|biological_process
1700016G22Rik	3.84765	3.02794	4.66737	1.53805	0.621107	0.689171	0.874193	Up	0.310436	0	0.418499	0.0513833	0.104254	0.257687	71867	RIKEN cDNA 1700016G22 gene	non_coding			GO:0003674,GO:0005575,GO:0008150	molecular_function|cellular_component|biological_process
1700017B05Rik	1917.56	1762.92	2072.19	1.17554	0.233329	0.132293	0.404518	Up	11.5558	10.6029	8.67592	8.20182	7.86051	7.18188	74211	RIKEN cDNA 1700017B05 gene	protein_coding			GO:0003674,GO:0005829,GO:0008150	molecular_function|cytosol|biological_process
1700017M07Rik	14.8088	22.3539	7.26374	0.323998	-1.62594	0.0245062	0.141887	Down	0.13944	0.21123	0.350895	0.387745	0.622815	0.907453	76398	RIKEN cDNA 1700017M07 gene	non_coding			GO:0003674,GO:0005575,GO:0008150	molecular_function|cellular_component|biological_process
1700018G05Rik	10.9557	13.6249	8.28658	0.608922	-0.715671	0.356709	0.667322	Down	0.790928	0.748836	0.345545	0.610934	1.31702	0.842553	69388	RIKEN cDNA 1700018G05 gene	non_coding			GO:0003674,GO:0005575,GO:0008150	molecular_function|cellular_component|biological_process
1700018L02Rik	3.25724	1.54721	4.96728	3.22341	1.68859	0.338348	0.652633	Up	0.0843572	0.0599008	0.221126	0.0977396	0	0	67329	RIKEN cDNA 1700018L02 gene	non_coding			GO:0003674,GO:0005575,GO:0008150	molecular_function|cellular_component|biological_process
1700019D03Rik	402.503	493.113	311.894	0.632379	-0.661139	0.109408	0.363149	Down	0.928753	2.30823	3.3443	2.90969	2.1115	4.20365	67080	RIKEN cDNA 1700019D03 gene	protein_coding			GO:0003674,GO:0005886,GO:0008150,GO:0016020,GO:0034237	molecular_function|plasma membrane|biological_process|membrane|protein kinase A regulatory subunit binding
1700020G03Rik	6.08033	3.39119	8.76948	2.5773	1.36586	0.294832	0.613686	Up	0.103278	0.00888925	0.177201	0.0108784	0.0662148	0.021822	105243207	RIKEN cDNA 1700020G03 gene	non_coding			GO:0003674,GO:0005575,GO:0008150	molecular_function|cellular_component|biological_process
1700020L13Rik	4.49821	2.6626	6.33381	2.38006	1.251	0.32234	0.640243	Up	0.288749	0.0420588	0.163025	0.0772052	0.0783225	0.0258123	108167416	RIKEN cDNA 1700020L13 gene	non_coding			GO:0003674,GO:0005575,GO:0008150	molecular_function|cellular_component|biological_process
1700020L24Rik	3.08521	4.18919	1.98124	0.475333	-1.07299	0.474156	0.757596	Down	0.0976727	0.069356	0	0.141459	0.114805	0.0567534	66330	RIKEN cDNA 1700020L24 gene	protein_coding			GO:0003674,GO:0005575,GO:0008150	molecular_function|cellular_component|biological_process
1700022N22Rik	12.0458	13.728	10.3637	0.755564	-0.404374	0.60896	0.83454	Down	0.119849	0.291783	0.197473	0.357074	0.241494	0.119382	69431	RIKEN cDNA 1700022N22 gene	non_coding			GO:0003674,GO:0005575,GO:0008150	molecular_function|cellular_component|biological_process
1700023D09Rik	9.28593	7.58123	10.9906	1.44834	0.534396	0.578745	0.817358	Up	0.381136	0.561325	0.66605	0.343466	0.597319	0.0492137	102640359	RIKEN cDNA 1700023D09 gene	non_coding			GO:0003674,GO:0005575,GO:0008150	molecular_function|cellular_component|biological_process
1700024G13Rik	5.55411	6.84801	4.26021	0.623999	-0.680384	0.570096	0.81334	Down	0.660763	0.250239	0.0692826	0.612469	0.621332	0.153576	67085	RIKEN cDNA 1700024G13 gene	protein_coding			GO:0003674,GO:0005575,GO:0008150	molecular_function|cellular_component|biological_process
1700024N05Rik	3.59723	6.0622	1.13226	0.188045	-2.41085	0.105777	0.356284	Down	0.0533977	0.0505559	0	0.154672	0.282438	0.0620542	75520	RIKEN cDNA 1700024N05 gene	non_coding			GO:0003674,GO:0005575,GO:0008150	molecular_function|cellular_component|biological_process
1700025G04Rik	6324.07	6544.85	6103.29	0.93255	-0.100748	0.497968	0.772226	Down	17.9219	17.0241	15.0253	16.0851	18.0061	13.4467	69399	RIKEN cDNA 1700025G04 gene	protein_coding			GO:0003674,GO:0005575,GO:0008150	molecular_function|cellular_component|biological_process
1700028E10Rik	6.75857	5.35801	8.15912	1.52313	0.607038	0.5771	0.816594	Up	0.0580538	0.0641249	0.152177	0.100895	0.0454912	0.0112442	625175	RIKEN cDNA 1700028E10 gene	non_coding			GO:0003674,GO:0005575,GO:0008150	molecular_function|cellular_component|biological_process
1700028J19Rik	8.43103	8.73445	8.12761	0.928998	-0.106253	0.902083	0.966475	Down	0.177093	0.14671	0.301741	0.15389	0.130098	0.308704	70004	RIKEN cDNA 1700028J19 gene	non_coding			GO:0003674,GO:0005575,GO:0005886,GO:0008150	molecular_function|cellular_component|plasma membrane|biological_process
1700028K03Rik	8.71598	9.13137	8.3006	0.910575	-0.13515	0.873539	0.955328	Down	0.12134	0.0612705	0.050891	0.093726	0.0855741	0.0470035	76421	RIKEN cDNA 1700028K03 gene	protein_coding			GO:0005515,GO:0005694,GO:0007130,GO:0007131,GO:0051321	protein binding|chromosome|synaptonemal complex assembly|reciprocal meiotic recombination|meiotic cell cycle
1700029J07Rik	50.1688	48.8823	51.4554	1.05154	0.0725042	0.854325	0.947072	Up	0.575037	0.444621	0.693381	0.377548	0.642107	0.423231	69479	RIKEN cDNA 1700029J07 gene	protein_coding			GO:0003674,GO:0005737,GO:0005813,GO:0005856,GO:0005881,GO:0008150,GO:0097731	molecular_function|cytoplasm|centrosome|cytoskeleton|cytoplasmic microtubule|biological_process|9+0 non-motile cilium
1700030C10Rik	77.1471	85.915	68.3791	0.796496	-0.328261	0.539879	0.79862	Down	2.13189	0.735286	0.766401	1.94078	0.698054	1.34493	69513	RIKEN cDNA 1700030C10 gene	non_coding			GO:0003674,GO:0005575,GO:0008150	molecular_function|cellular_component|biological_process
1700030J22Rik	158.313	137.288	179.337	1.30711	0.386382	0.126006	0.393919	Up	1.71651	1.55067	1.16987	1.09385	0.933139	0.980767	69528	RIKEN cDNA 1700030J22 gene	protein_coding			GO:0003674,GO:0005654,GO:0005829,GO:0008150	molecular_function|nucleoplasm|cytosol|biological_process
1700030K09Rik	135.793	137.075	134.51	0.981215	-0.0273585	0.901482	0.96623	Down	1.49513	1.56555	1.54691	1.29637	1.45479	1.41532	72254	RIKEN cDNA 1700030K09 gene	protein_coding			GO:0003674,GO:0005575,GO:0008150	molecular_function|cellular_component|biological_process
1700031F05Rik	17.0465	21.2318	12.8611	0.606617	-0.721141	0.258049	0.575566	Down	0.405779	0.292712	0.162084	0.313435	0.454244	0.494017	73300	RIKEN cDNA 1700031F05 gene	protein_coding			GO:0003674,GO:0005575,GO:0008150	molecular_function|cellular_component|biological_process
1700034H15Rik	41.5506	34.4951	48.606	1.40873	0.494391	0.276776	0.59568	Up	0.482318	0.222616	0.316076	0.16765	0.2622	0.210191	98736	RIKEN cDNA 1700034H15 gene	non_coding			GO:0003674,GO:0005575,GO:0008150	molecular_function|cellular_component|biological_process
1700034P13Rik	10.8615	10.2442	11.4789	1.12096	0.164732	0.833303	0.937542	Up	0.228834	0.28332	0.184568	0.122371	0.124142	0.306844	73331	RIKEN cDNA 1700034P13 gene	non_coding			GO:0003674,GO:0005575,GO:0008150	molecular_function|cellular_component|biological_process
1700036A12Rik	3.03958	1.51818	4.56098	3.00815	1.58887	0.270256	0.588687	Up	0.0578495	0.0985874	0.0242626	0.0134053	0.0135993	0.0268911	100040447	RIKEN cDNA 1700036A12 gene	non_coding			GO:0003674,GO:0005575,GO:0008150	molecular_function|cellular_component|biological_process
1700037C18Rik	24.0212	17.567	30.4754	1.73727	0.796821	0.195344	0.50147	Up	0.671244	1.08946	0.754087	0.694401	0.366314	0.222875	73261	RIKEN cDNA 1700037C18 gene	protein_coding			GO:0003674,GO:0005575,GO:0008150	molecular_function|cellular_component|biological_process
1700040K01Rik	31.9168	12.869	50.9646	3.95782	1.98471	0.000777325	0.0108995	Up	1.46235	1.81577	0.930041	0.249984	0.535382	0.167156	102631675	RIKEN cDNA 1700040K01 gene	non_coding			GO:0003674,GO:0005575,GO:0008150	molecular_function|cellular_component|biological_process
1700042O10Rik	1.46873	2.65418	0.283282	0.116654	-3.09969	0.161802	0.452795	Down	0	0.0231617	0	0.056689	0.086264	0.056859	73321	RIKEN cDNA 1700042O10 gene	non_coding			GO:0003674,GO:0005575,GO:0008150	molecular_function|cellular_component|biological_process
1700045H11Rik	2.58296	2.288	2.87792	1.25966	0.333039	0.815108	0.93044	Up	0.088696	0.209939	0.1395	0.15415	0.104254	0.0515374	73348	RIKEN cDNA 1700045H11 gene	non_coding			GO:0003674,GO:0005575,GO:0008150	molecular_function|cellular_component|biological_process
1700048O20Rik	9.72332	7.55977	11.8869	1.56872	0.649591	0.443415	0.735627	Up	0.113846	0.202101	0.268582	0.0659531	0.183996	0.0826886	69430	RIKEN cDNA 1700048O20 gene	non_coding			GO:0003674,GO:0005575,GO:0008150	molecular_function|cellular_component|biological_process
1700052K11Rik	529.929	500.363	559.494	1.11819	0.161166	0.297665	0.616735	Up	6.56914	6.93123	7.59611	5.97036	5.32688	5.4059	73431	RIKEN cDNA 1700052K11 gene	non_coding			GO:0003674,GO:0005575,GO:0008150	molecular_function|cellular_component|biological_process
1700054A03Rik	1.50782	0.374603	2.64103	6.45462	2.69033	0.239301	0.554693	Up	0.0337159	0.063843	0.212111	0	0.0396298	0	78457	RIKEN cDNA 1700054A03 gene	non_coding			GO:0003674,GO:0005575,GO:0008150	molecular_function|cellular_component|biological_process
1700055D16Rik	7.73821	10.6365	4.83993	0.455846	-1.13338	0.370703	0.679815	Down	0.176341	0	0.0246531	0.12259	0.124364	0.136619	105242798	RIKEN cDNA 1700055D16 gene	non_coding			GO:0003674,GO:0005575,GO:0008150	molecular_function|cellular_component|biological_process
1700055D18Rik	10.1381	8.70542	11.5708	1.32713	0.408313	0.631179	0.845652	Up	0.221711	0.177618	0.286116	0.0592808	0.120277	0.277473	73405	RIKEN cDNA 1700055D18 gene	non_coding			GO:0003674,GO:0005575,GO:0008150	molecular_function|cellular_component|biological_process
1700055K11Rik	4.28472	0.378386	8.19106	20.0351	4.32446	0.0141849	0.0976994	Up	0.0347862	0.0878264	0.206687	0	0	0.0134752	102640035	RIKEN cDNA 1700055K11 gene	non_coding			GO:0003674,GO:0005575,GO:0008150	molecular_function|cellular_component|biological_process
1700056E22Rik	12.8424	15.2116	10.4731	0.687562	-0.540437	0.533812	0.795004	Down	0.0543917	0.411976	0.513279	0.441142	0.351628	0.47407	73363	RIKEN cDNA 1700056E22 gene	protein_coding			GO:0003674,GO:0005575,GO:0008150	molecular_function|cellular_component|biological_process
1700060C16Rik	1.72094	0	3.44188	16.4236	4.0377	0.0946599	0.335417	Up	0.326181	0.0386028	0.128253	0	0	0	73425	RIKEN cDNA 1700060C16 gene	non_coding			GO:0003674,GO:0005575,GO:0008150	molecular_function|cellular_component|biological_process
1700063D05Rik	1.97445	3.38277	0.56613	0.168292	-2.57096	0.23201	0.547193	Down	0.0370922	0.0351182	0	0	0.26159	0.129316	78500	RIKEN cDNA 1700063D05 gene	non_coding			GO:0003674,GO:0005575,GO:0008150	molecular_function|cellular_component|biological_process
1700066M21Rik	219.594	211.188	228	1.07968	0.11061	0.580231	0.81853	Up	2.3239	1.84463	2.01824	1.69531	1.867	1.50944	73467	RIKEN cDNA 1700066M21 gene	protein_coding			GO:0003674,GO:0005739,GO:0006119,GO:0070469	molecular_function|mitochondrion|oxidative phosphorylation|respirasome
1700067K01Rik	4.38495	3.78556	4.98433	1.31292	0.39278	0.784411	0.918342	Up	0	0.0656095	0.13321	0.0267636	0.0543018	0.0536877	73453	RIKEN cDNA 1700067K01 gene	protein_coding			GO:0001701,GO:0003674,GO:0005575	in utero embryonic development|molecular_function|cellular_component
1700082M22Rik	1.40262	0.761404	2.04383	2.68066	1.42259	0.490159	0.767032	Up	0.0070866	0.0134189	0.0297219	0.00821081	0.00832963	0	105243269	RIKEN cDNA 1700082M22 gene	non_coding			GO:0003674,GO:0005575,GO:0008150	molecular_function|cellular_component|biological_process
1700084E18Rik	5.2663	5.62661	4.90599	0.870158	-0.20065	0.886059	0.960994	Down	0.241824	0.40067	0.380337	0	0.923785	0.140514	67350	RIKEN cDNA 1700084E18 gene	non_coding			GO:0003674,GO:0005575,GO:0008150	molecular_function|cellular_component|biological_process
1700086L19Rik	157.747	129.857	185.638	1.43007	0.516081	0.0876183	0.320774	Up	6.96429	5.42727	3.76974	3.32086	3.9895	2.71725	74284	RIKEN cDNA 1700086L19 gene	non_coding			GO:0003674,GO:0005575,GO:0008150	molecular_function|cellular_component|biological_process
1700086O06Rik	36.3814	39.412	33.3507	0.846099	-0.241101	0.574131	0.814848	Down	0.490285	0.606029	0.471236	0.410268	0.672332	0.569768	73516	RIKEN cDNA 1700086O06 gene	non_coding			GO:0003674,GO:0005575,GO:0008150	molecular_function|cellular_component|biological_process
1700086P04Rik	30.8698	31.8859	29.8536	0.935029	-0.0969177	0.836384	0.938686	Down	0.114918	0.0884021	0.169446	0.108184	0.130855	0.112681	67349	RIKEN cDNA 1700086P04 gene	non_coding			GO:0003674,GO:0005575,GO:0008150	molecular_function|cellular_component|biological_process
1700088E04Rik	158.317	145.428	171.205	1.17765	0.235905	0.412309	0.712966	Up	4.00737	4.50549	2.86855	2.47781	2.55896	3.55994	27660	RIKEN cDNA 1700088E04 gene	protein_coding			GO:0003674,GO:0005575,GO:0008150	molecular_function|cellular_component|biological_process
1700093K21Rik	2.07258	2.68321	1.46194	0.543812	-0.878821	0.631439	0.845682	Down	0.00833546	0.00789185	0.0262198	0.0482889	0.0195951	0	67358	RIKEN cDNA 1700093K21 gene	protein_coding			GO:0003674,GO:0005575,GO:0008150,GO:0016020	molecular_function|cellular_component|biological_process|membrane
1700095J03Rik	4.34399	4.96195	3.72603	0.752768	-0.409722	0.718222	0.88815	Down	0.0869367	0.0548734	0.0455776	0.100728	0.034062	0.084192	74293	RIKEN cDNA 1700095J03 gene	non_coding			GO:0003674,GO:0005575,GO:0008150	molecular_function|cellular_component|biological_process
1700096K18Rik	61.0775	76.3172	45.8378	0.600487	-0.735795	0.0435085	0.207286	Down	0.671525	1.18566	1.00859	1.3248	1.51463	1.41314	73571	RIKEN cDNA 1700096K18 gene	non_coding			GO:0003674,GO:0005575,GO:0008150	molecular_function|cellular_component|biological_process
1700101I11Rik	9.47676	10.6197	8.33385	0.784912	-0.349397	0.649163	0.854895	Down	0.226927	0.286467	0.211501	0.204499	0.266732	0.351621	100504641	RIKEN cDNA 1700101I11 gene	non_coding			GO:0003674,GO:0005575,GO:0008150	molecular_function|cellular_component|biological_process
1700102H20Rik	1.80503	0.749205	2.86086	3.80029	1.92611	0.358634	0.669407	Up	0.280267	0.0884504	0.0979555	0	0.109809	0	68230	RIKEN cDNA 1700102H20 gene	non_coding			GO:0003674,GO:0005575,GO:0008150	molecular_function|cellular_component|biological_process
1700102P08Rik	11.1268	10.6037	11.65	1.09585	0.132055	0.868419	0.954027	Up	0.0952346	0.154571	0.299567	0.0945794	0.175905	0.173916	112418	RIKEN cDNA 1700102P08 gene	protein_coding			GO:0003674,GO:0005575,GO:0007283,GO:0030154	molecular_function|cellular_component|spermatogenesis|cell differentiation
1700105P06Rik	2.28604	1.12759	3.44448	3.04331	1.60564	0.351288	0.663434	Up	0.0940907	0.311792	0.147985	0	0.110595	0.0546721	654802	RIKEN cDNA 1700105P06 gene	non_coding			GO:0003674,GO:0005575,GO:0008150	molecular_function|cellular_component|biological_process
1700108F19Rik	9.02154	10.634	7.40913	0.697785	-0.519145	0.629686	0.844968	Down	0.151488	0.516334	0.0953035	0.210624	0.106836	0.668977	73272	RIKEN cDNA 1700108F19 gene	non_coding			GO:0003674,GO:0005575,GO:0008150	molecular_function|cellular_component|biological_process
1700109H08Rik	8.00549	5.66699	10.344	1.82304	0.866348	0.348058	0.660084	Up	0.625276	0.313411	0.385657	0.127847	0.389093	0.128231	77036	RIKEN cDNA 1700109H08 gene	protein_coding			GO:0003674,GO:0005509,GO:0005575,GO:0008150	molecular_function|calcium ion binding|cellular_component|biological_process
1700110I01Rik	3.8659	3.07758	4.65422	1.51469	0.599025	0.684396	0.872197	Up	0.0309029	0.0877748	0.12961	0.107416	0	0.0359127	73549	RIKEN cDNA 1700110I01 gene	non_coding			GO:0003674,GO:0005575,GO:0008150	molecular_function|cellular_component|biological_process
1700110K17Rik	2.09947	0.378386	3.82056	9.34405	3.22405	0.183173	0.484841	Up	0	0.140671	0.350523	0	0	0.0431663	73558	RIKEN cDNA 1700110K17 gene	non_coding			GO:0003674,GO:0005575,GO:0008150	molecular_function|cellular_component|biological_process
1700112D23Rik	1.35275	0.378386	2.32711	5.69237	2.50903	0.276918	0.595758	Up	0.0221181	0.0628228	0.0927652	0	0	0.0257037	73611	RIKEN cDNA 1700112D23 gene	non_coding			GO:0003674,GO:0005575,GO:0008150	molecular_function|cellular_component|biological_process
1700112J16Rik	15.1865	13.6922	16.6808	1.21883	0.285496	0.707947	0.884303	Up	0.242917	0.179991	0.188259	0.195793	0.211041	0.0368213	76628	RIKEN cDNA 1700112J16 gene	non_coding			GO:0003674,GO:0005575,GO:0008150	molecular_function|cellular_component|biological_process
1700113A16Rik	13.2123	10.5915	15.8332	1.49321	0.578415	0.399369	0.70398	Up	0.481557	0.506588	0.476873	0.154986	0.37735	0.341993	76642	RIKEN cDNA 1700113A16 gene	non_coding			GO:0003674,GO:0005575,GO:0008150	molecular_function|cellular_component|biological_process
1700122E12Rik	2.40277	1.89741	2.90813	1.52976	0.613309	0.70653	0.883416	Up	0.0421899	0.0266297	0.0737285	0.0325886	0.0495903	0	73619	RIKEN cDNA 1700122E12 gene	non_coding			GO:0003674,GO:0005575,GO:0008150	molecular_function|cellular_component|biological_process
1700123M08Rik	8.91547	7.9756	9.85534	1.23444	0.303852	0.73839	0.89724	Up	0.345382	0.116786	0.388008	0.22867	0.289974	0.0860086	100503636	RIKEN cDNA 1700123M08 gene	non_coding			GO:0009611	response to wounding
1700123O12Rik	1.15611	0	2.31222	11.0274	3.46302	0.282774	0.601729	Up	0	0.219179	0.14564	0	0	0	73624	RIKEN cDNA 1700123O12 gene	non_coding			GO:0003674,GO:0005575,GO:0008150	molecular_function|cellular_component|biological_process
1700123O20Rik	1105.05	1051.21	1158.9	1.10238	0.140626	0.378148	0.687039	Up	18.2879	18.1046	19.4086	12.8746	14.1234	17.8748	58248	RIKEN cDNA 1700123O20 gene	protein_coding			GO:0003674,GO:0005739,GO:0005829,GO:0008150	molecular_function|mitochondrion|cytosol|biological_process
1810006J02Rik	2.72574	1.14357	4.30791	3.77463	1.91634	0.22478	0.539574	Up	0.093533	0.073796	0.0653811	0.0180618	0	0.036232	69030	RIKEN cDNA 1810006J02 gene	non_coding			GO:0003674,GO:0005575,GO:0008150	molecular_function|cellular_component|biological_process
1810010H24Rik	238.661	260.108	217.213	0.835007	-0.260139	0.794153	0.922898	Down	0.261675	1.8144	3.70403	1.53377	1.27553	3.32717	69066	RIKEN cDNA 1810010H24 gene	protein_coding			GO:0003674,GO:0005575,GO:0008150	molecular_function|cellular_component|biological_process
1810012K16Rik	3.58413	3.39497	3.77329	1.10749	0.147289	0.907175	0.968587	Up	0.145563	0.183755	0.305252	0.0562183	0.285159	0.169161	69108	RIKEN cDNA 1810012K16 gene	non_coding			GO:0003674,GO:0005575,GO:0008150	molecular_function|cellular_component|biological_process
1810013A23Rik	1.14802	0	2.29603	10.9561	3.45366	0.189429	0.494026	Up	0.126131	0.238837	0.132252	0	0	0	69050	RIKEN cDNA 1810013A23 gene	non_coding			GO:0003674,GO:0005575,GO:0008150	molecular_function|cellular_component|biological_process	WP723,WP509,WP431,WP4347,WP447,WP2316	Wnt signaling pathway and pluripotency|Nuclear Receptors|Nuclear receptors in lipid metabolism and toxicity|Eicosanoid metabolism via cyclooxygenases (COX)|Adipogenesis genes|PPAR signaling pathway
1810019D21Rik	108.605	97.5569	119.654	1.22617	0.294155	0.283921	0.602688	Up	1.96399	2.29788	2.34391	1.35054	1.50146	1.92982	69771	RIKEN cDNA 1810019D21 gene	non_coding			GO:0003674,GO:0005575,GO:0008150	molecular_function|cellular_component|biological_process
1810019N24Rik	4.38724	1.889	6.88549	3.63833	1.86328	0.132843	0.405437	Up	0.207074	0.0980267	0.108561	0.0199936	0.060849	0.0200536	69086	RIKEN cDNA 1810019N24 gene	non_coding			GO:0003674,GO:0005575,GO:0008150	molecular_function|cellular_component|biological_process
1810021B22Rik	9.18495	10.3351	8.03481	0.779004	-0.360298	0.698762	0.878988	Down	0.402116	0.418787	0.29514	0.698861	0.0945299	0.467304	69120	RIKEN cDNA 1810021B22 gene	non_coding			GO:0003674,GO:0005575,GO:0008150	molecular_function|cellular_component|biological_process
1810021M19Rik	4.20457	3.78556	4.62357	1.21941	0.286183	0.808845	0.928717	Up	0.00976183	0.0369692	0.0307065	0.0113104	0.0229482	0.0226887	105244357	RIKEN cDNA 1810021M19 gene	non_coding			GO:0003674,GO:0005575,GO:0008150	molecular_function|cellular_component|biological_process
1810024B03Rik	12.0912	12.8778	11.3046	0.876277	-0.190542	0.803064	0.926491	Down	0.125629	0.171807	0.248814	0.0970392	0.164073	0.291991	329509	RIKEN cDNA 1810024B03 gene	protein_coding			GO:0004674,GO:0005634,GO:0005737,GO:0005829,GO:0006468,GO:0035556,GO:0045719	protein serine/threonine kinase activity|nucleus|cytoplasm|cytosol|protein phosphorylation|intracellular signal transduction|negative regulation of glycogen biosynthetic process
1810030O07Rik	1354.83	1283.9	1425.76	1.11057	0.151301	0.30689	0.623885	Up	14.2113	11.8687	10.862	9.0735	9.8378	10.561	69155	RIKEN cDNA 1810030O07 gene	protein_coding			GO:0003674,GO:0005575,GO:0008150	molecular_function|cellular_component|biological_process
1810034E14Rik	88.2623	109.654	66.8703	0.60929	-0.714798	0.0384836	0.191928	Down	0.788075	1.13302	1.4537	1.31892	1.61246	1.98431	66503	RIKEN cDNA 1810034E14 gene	non_coding			GO:0003674,GO:0005575,GO:0008150	molecular_function|cellular_component|biological_process
1810037I17Rik	1656.75	1788.28	1525.23	0.852889	-0.22957	0.220943	0.534412	Down	42.2229	50.4353	49.3854	43.0518	43.1048	61.6557	67704	RIKEN cDNA 1810037I17 gene	protein_coding	mmu04020	Calcium signaling pathway	GO:0005515,GO:0005789,GO:0016020,GO:1901877,GO:1901895	protein binding|endoplasmic reticulum membrane|membrane|negative regulation of calcium ion binding|negative regulation of ATPase-coupled calcium transmembrane transporter activity
1810041H14Rik	23.0391	20.8079	25.2703	1.2133	0.278942	0.74849	0.901849	Up	0.275376	1.23842	1.47978	0.199413	0.485517	1.52008	78312	RIKEN cDNA 1810041H14 gene	non_coding			GO:0003674,GO:0005575,GO:0008150	molecular_function|cellular_component|biological_process
1810044D09Rik	15.0216	15.5749	14.4684	0.928338	-0.107279	0.887433	0.961214	Down	0.270559	1.2808	1.13475	0.877746	0.954052	0.75461	69798	RIKEN cDNA 1810044D09 gene	non_coding			GO:0003674,GO:0005575,GO:0008150	molecular_function|cellular_component|biological_process
1810053B23Rik	3.57025	4.53098	2.60952	0.574073	-0.800694	0.524797	0.790243	Down	0.030544	0.019279	0.0427015	0.023593	0.0837704	0.0354956	69857	RIKEN cDNA 1810053B23 gene	non_coding			GO:0003674,GO:0005575,GO:0008150	molecular_function|cellular_component|biological_process
1810055G02Rik	779.345	691.987	866.702	1.25231	0.324596	0.0628798	0.260589	Up	9.42491	11.5841	13.2362	7.59773	8.02995	8.6295	72056	RIKEN cDNA 1810055G02 gene	protein_coding			GO:0003674,GO:0005654,GO:0005794,GO:0005886,GO:0008150,GO:0016020,GO:0043231	molecular_function|nucleoplasm|Golgi apparatus|plasma membrane|biological_process|membrane|intracellular membrane-bounded organelle
1810062G17Rik	46.7801	35.3457	58.2145	1.64812	0.720819	0.0906232	0.32721	Up	2.82902	1.53055	1.48315	1.07031	1.01793	1.03997	72282	RIKEN cDNA 1810062G17 gene	protein_coding			GO:0003674,GO:0005575,GO:0008150	molecular_function|cellular_component|biological_process
1810062O18Rik	19.5851	16.5956	22.5746	1.35783	0.441298	0.536753	0.797066	Up	0.94548	0.629929	1.17494	0.162292	0.946683	0.69181	75602	RIKEN cDNA 1810062O18 gene	non_coding			GO:0003674,GO:0005575,GO:0008150	molecular_function|cellular_component|biological_process
1810073O08Rik	5.7246	10.2863	1.1629	0.112556	-3.15128	0.0114701	0.0837995	Down	0.028293	0	0.0296659	0.180298	0.0997674	0.164399	72285	RIKEN cDNA 1810073O08 gene	non_coding			GO:0003674,GO:0005575,GO:0008150	molecular_function|cellular_component|biological_process
2010001A14Rik	77.5147	97.4811	57.5482	0.589912	-0.761428	0.0430347	0.205568	Down	1.58341	2.44425	2.81519	2.55249	3.23678	4.52025	76516	RIKEN cDNA 2010001A14 gene	non_coding			GO:0003674,GO:0005575,GO:0008150	molecular_function|cellular_component|biological_process
2010001M07Rik	3.0817	5.2991	0.8643	0.163006	-2.617	0.102741	0.350311	Down	0.132485	0	0.0694571	0.153503	0.311449	0.615853	115487174	RIKEN cDNA 2010001M07 gene	non_coding			GO:0003674,GO:0005575,GO:0008150	molecular_function|cellular_component|biological_process
2010003K11Rik	420.396	588.907	251.884	0.42769	-1.22536	0.139261	0.416385	Down	1.37464	8.83299	9.286	10.444	9.3502	20.8982	69861	RIKEN cDNA 2010003K11 gene	protein_coding			GO:0003674,GO:0005575,GO:0008150	molecular_function|cellular_component|biological_process
2010109A12Rik	4.30046	4.515	4.08592	0.902222	-0.148446	0.92348	0.974294	Down	0.287938	0	0.402547	0.0556028	0.507667	0.111539	75610	RIKEN cDNA 2010109A12 gene	protein_coding			GO:0003674,GO:0005575,GO:0008150	molecular_function|cellular_component|biological_process
2010109P13Rik	2.6759	3.37142	1.98037	0.587848	-0.766484	0.749045	0.90217	Down	0.1389	0.0219179	0	0	0.244896	0	108169160	RIKEN cDNA 2010109P13 gene	non_coding			GO:0003674,GO:0005575,GO:0008150	molecular_function|cellular_component|biological_process
2010110K18Rik	1.56419	0	3.12839	14.9381	3.90092	0.113953	0.37231	Up	0.203863	0.0827202	0.0305365	0	0	0	100503082	RIKEN cDNA 2010110K18 gene	non_coding			GO:0003674,GO:0005575,GO:0008150	molecular_function|cellular_component|biological_process
2010204K13Rik	2135.08	2788.85	1481.32	0.531135	-0.912851	1.91672e-09	1.7396e-07	Down	45.9526	45.639	51.0098	71.6664	72.2461	93.9143	68355	RIKEN cDNA 2010204K13 gene	non_coding			GO:0003674,GO:0005575,GO:0008150	molecular_function|cellular_component|biological_process
2010315B03Rik	242.293	235.977	248.609	1.05324	0.0748286	0.748252	0.90165	Up	2.18052	2.65432	3.28597	2.39519	2.47423	1.96358	630836	RIKEN cDNA 2010315B03 gene	protein_coding			GO:0000978,GO:0003700,GO:0006357	RNA polymerase II cis-regulatory region sequence-specific DNA binding|DNA-binding transcription factor activity|regulation of transcription by RNA polymerase II					zf-C2H2
2010320M18Rik	180.046	187.013	173.078	0.925155	-0.112233	0.647622	0.854116	Down	6.31867	7.11871	7.69864	5.27607	6.76314	8.24551	72093	RIKEN cDNA 2010320M18 gene	non_coding			GO:0003674,GO:0005575,GO:0008150	molecular_function|cellular_component|biological_process
2200002D01Rik	839.857	728.485	951.229	1.30564	0.384753	0.140308	0.418513	Up	44.6087	55.5434	70.595	30.891	31.6429	53.4076	72275	RIKEN cDNA 2200002D01 gene	protein_coding			GO:0003674,GO:0005634,GO:0005654,GO:0005730,GO:0005829,GO:0005886,GO:0008150	molecular_function|nucleus|nucleoplasm|nucleolus|cytosol|plasma membrane|biological_process
2210011K15Rik	5.59903	5.68127	5.51678	0.969177	-0.0451686	0.96902	0.9905	Down	0.0535336	0.0126711	0.0631476	0.0155065	0.0235964	0.0777652	72365	RIKEN cDNA 2210011K15 gene	non_coding			GO:0003674,GO:0005575,GO:0008150	molecular_function|cellular_component|biological_process
2210016L21Rik	960.954	1015.8	906.108	0.89196	-0.164949	0.571277	0.813369	Down	14.6839	20.8447	23.7999	15.784	14.3198	28.9103	72357	RIKEN cDNA 2210016L21 gene	protein_coding			GO:0005575,GO:0005634,GO:0007275,GO:0016055,GO:0030178,GO:0060061	cellular_component|nucleus|multicellular organism development|Wnt signaling pathway|negative regulation of Wnt signaling pathway|Spemann organizer formation
2210039B01Rik	25.6509	31.0833	20.2186	0.649729	-0.62209	0.201672	0.50859	Down	0.556847	0.527212	0.690025	0.615858	0.952031	0.853022	73644	RIKEN cDNA 2210039B01 gene	non_coding			GO:0003674,GO:0005575,GO:0008150	molecular_function|cellular_component|biological_process
2210404E10Rik	1.02957	0	2.05915	9.80528	3.29356	0.248994	0.565529	Up	0.0449545	0.042562	0.235679	0	0	0	72305	RIKEN cDNA 2210404E10 gene	non_coding			GO:0003674,GO:0005575,GO:0008150	molecular_function|cellular_component|biological_process
2210406O10Rik	3.11543	3.025	3.20586	1.05697	0.0799315	0.96032	0.98803	Up	0.0771213	0	0.0970362	0.0357423	0.0906489	0.0179248	76710	RIKEN cDNA 2210406O10 gene	non_coding			GO:0003674,GO:0005575,GO:0008150	molecular_function|cellular_component|biological_process
2210408F21Rik	15.7055	15.1742	16.2369	1.06868	0.0958271	0.892957	0.962697	Up	0.580482	0.191162	0.661575	0.292421	0.355984	0.527937	73652	RIKEN cDNA 2210408F21 gene	non_coding			GO:0003674,GO:0005575,GO:0008150	molecular_function|cellular_component|biological_process
2210408I21Rik	182.268	183.148	181.388	0.990876	-0.0132243	0.965401	0.98943	Down	0.377593	0.212075	0.217418	0.29364	0.20762	0.215684	72371	RIKEN cDNA 2210408I21 gene	protein_coding			GO:0003674,GO:0005575,GO:0008150	molecular_function|cellular_component|biological_process
2210418O10Rik	19.9639	19.7679	20.1599	1.02006	0.0286565	0.959937	0.98795	Up	0.106877	0.202378	0.154086	0.14705	0.141327	0.11644	100504263	RIKEN cDNA 2210418O10 gene	protein_coding			GO:0003674,GO:0005575,GO:0008150	molecular_function|cellular_component|biological_process					zf-C2H2
2300009A05Rik	81.827	82.2311	81.4229	0.990231	-0.0141636	0.963761	0.989066	Down	4.13386	3.53913	4.74945	4.33107	2.94639	3.78188	69478	RIKEN cDNA 2300009A05 gene	protein_coding			GO:0003674,GO:0005575,GO:0005576,GO:0008150	molecular_function|cellular_component|extracellular region|biological_process
2310001H17Rik	7.17528	6.50537	7.84519	1.20635	0.27065	0.779999	0.915899	Up	0.205189	0.259025	0.466148	0.396233	0.12059	0.158969	76432	RIKEN cDNA 2310001H17 gene	non_coding			GO:0003674,GO:0005575,GO:0008150	molecular_function|cellular_component|biological_process
2310008N11Rik	1.79283	3.01952	0.56613	0.188567	-2.40685	0.278617	0.597683	Down	0.0464635	0.0439908	0	0	0.109227	0.323976	72316	RIKEN cDNA 2310008N11 gene	non_coding			GO:0003674,GO:0005575,GO:0008150	molecular_function|cellular_component|biological_process
2310009B15Rik	102.104	90.3363	113.871	1.25993	0.333344	0.309034	0.62619	Up	5.94131	4.97104	7.29202	3.36187	3.57293	5.83402	69549	RIKEN cDNA 2310009B15 gene	protein_coding			GO:0003674,GO:0005575,GO:0008150	molecular_function|cellular_component|biological_process
2310010J17Rik	32.4864	29.6261	35.3467	1.19205	0.253442	0.606498	0.833101	Up	1.17316	2.12889	2.66519	1.41591	1.49385	1.53377	78329	RIKEN cDNA 2310010J17 gene	non_coding			GO:0003674,GO:0005575,GO:0008150	molecular_function|cellular_component|biological_process
2310011J03Rik	1048.45	1057.95	1038.95	0.982073	-0.0260972	0.878837	0.957585	Down	17.9919	20.6965	18.2168	15.8321	15.2973	20.3008	66374	RIKEN cDNA 2310011J03 gene	protein_coding			GO:0003674,GO:0005575,GO:0008150	molecular_function|cellular_component|biological_process
2310015A10Rik	246.499	230.105	262.893	1.14212	0.191709	0.299238	0.618453	Up	1.5741	1.53144	1.8383	1.21378	1.38447	1.23635	69548	RIKEN cDNA 2310015A10 gene	non_coding			GO:0003674,GO:0005575,GO:0008150	molecular_function|cellular_component|biological_process
2310016G11Rik	15.3504	11.767	18.9338	1.60775	0.685047	0.501155	0.774441	Up	0.0250461	0.711394	0.892887	0.232155	0.235514	0.436596	69578	RIKEN cDNA 2310016G11 gene	non_coding			GO:0003674,GO:0005575,GO:0008150	molecular_function|cellular_component|biological_process
2310022A10Rik	547.047	580.534	513.56	0.884775	-0.176618	0.283762	0.602688	Down	5.08117	5.34621	5.27213	5.877	4.70524	5.12443	66367	RIKEN cDNA 2310022A10 gene	protein_coding			GO:0003674,GO:0005634,GO:0005654,GO:0008150	molecular_function|nucleus|nucleoplasm|biological_process
2310022B05Rik	3145.2	3056.52	3233.89	1.05802	0.0813729	0.558616	0.809017	Up	27.9206	29.8906	31.1682	23.9285	22.4146	28.1774	69551	RIKEN cDNA 2310022B05 gene	protein_coding			GO:0003674,GO:0005737,GO:0005829,GO:0008150	molecular_function|cytoplasm|cytosol|biological_process
2310030G06Rik	2014.73	1971.27	2058.19	1.04415	0.0623308	0.679014	0.870117	Up	52.4492	54.8053	42.6211	39.919	46.2678	41.3612	66952	RIKEN cDNA 2310030G06 gene	protein_coding			GO:0003674,GO:0008150	molecular_function|biological_process
2310033P09Rik	333.417	303.85	362.983	1.19458	0.256498	0.129454	0.400097	Up	9.90156	7.69198	9.05099	6.29998	6.71444	6.71227	67862	RIKEN cDNA 2310033P09 gene	protein_coding			GO:0003674,GO:0005575,GO:0008150	molecular_function|cellular_component|biological_process			R-MMU-168249,R-MMU-168256,R-MMU-6798695	Innate Immune System|Immune System|Neutrophil degranulation
2310034C09Rik	14.0476	28.0952	0	5.46394e-07	-20.8036	1.03703e-07	5.86582e-06	Down	0	0	0	0	2.45848	0	117172	RIKEN cDNA 2310034C09 gene	protein_coding			GO:0003674,GO:0005575,GO:0008150	molecular_function|cellular_component|biological_process			R-MMU-1266738,R-MMU-6805567	Developmental Biology|Keratinization
2310034G01Rik	1.5094	0.752989	2.26582	3.00596	1.58782	0.50522	0.777115	Up	0.0333736	0.221182	0	0	0.0392275	0.0387839	75579	RIKEN cDNA 2310034G01 gene	non_coding			GO:0003674,GO:0005575,GO:0008150	molecular_function|cellular_component|biological_process
2310034O05Rik	38.3798	56.0552	20.7045	0.368515	-1.4402	0.013377	0.0935677	Down	0.33259	0.404858	0.971458	0.770704	1.34033	1.98775	69571	RIKEN cDNA 2310034O05 gene	non_coding			GO:0003674,GO:0005575,GO:0008150	molecular_function|cellular_component|biological_process
2310039H08Rik	126.477	124.134	128.819	1.03711	0.0525633	0.861264	0.950939	Up	3.5382	5.08927	6.52798	3.90241	4.55871	4.50716	67101	RIKEN cDNA 2310039H08 gene	protein_coding			GO:0003674,GO:0005575,GO:0008150	molecular_function|cellular_component|biological_process
2310040G24Rik	14.1964	16.2555	12.1373	0.745471	-0.423776	0.547407	0.801875	Down	0.441134	0.417657	0.569279	0.353849	0.957252	0.394345	381792	RIKEN cDNA 2310040G24 gene	non_coding			GO:0009611	response to wounding
2310043M15Rik	1.83114	3.37899	0.283282	0.0915597	-3.44914	0.168924	0.463631	Down	0	0.0157587	0	0	0.136949	0.0386857	102633000	RIKEN cDNA 2310043M15 gene	non_coding			GO:0003674,GO:0005575,GO:0008150	molecular_function|cellular_component|biological_process
2310047D07Rik	11.6827	10.6016	12.7639	1.20194	0.265361	0.749396	0.902375	Up	0.0772345	0.0365621	0.101228	0.0447435	0.090782	0.0224388	69657	RIKEN cDNA 2310047D07 gene	non_coding			GO:0003674,GO:0005575,GO:0008150	molecular_function|cellular_component|biological_process
2310057M21Rik	473.831	468.793	478.869	1.02146	0.0306326	0.861235	0.950939	Up	4.54691	4.2613	3.92195	3.04347	4.22502	3.80236	68277	RIKEN cDNA 2310057M21 gene	protein_coding			GO:0005737,GO:0005739,GO:0008150,GO:0016787,GO:0016887,GO:0042802	cytoplasm|mitochondrion|biological_process|hydrolase activity|ATP hydrolysis activity|identical protein binding
2310057N15Rik	1.68571	3.37142	0	0.0471394	-4.40692	0.218781	0.531613	Down	0	0	0	0	0.271152	0	69696	RIKEN cDNA 2310057N15 gene	protein_coding			GO:0003674,GO:0005575,GO:0008150	molecular_function|cellular_component|biological_process			R-MMU-1266738,R-MMU-6805567	Developmental Biology|Keratinization
2310058N22Rik	201.612	187.383	215.84	1.15143	0.203431	0.59203	0.824447	Up	1.16051	0.518344	1.2249	0.531589	1.10122	0.595911	71921	RIKEN cDNA 2310058N22 gene	non_coding
2310061I04Rik	413.648	444.745	382.552	0.860134	-0.217367	0.137364	0.412753	Down	5.38314	5.43565	5.52784	5.45032	5.95006	5.45232	69662	RIKEN cDNA 2310061I04 gene	protein_coding			GO:0003674,GO:0005739,GO:0008150	molecular_function|mitochondrion|biological_process
2310068J16Rik	6.08097	1.13979	11.0221	9.6634	3.27253	0.00880137	0.0695363	Up	0.164218	0.310957	0.418168	0.0271814	0.0275747	0.0272629	70281	RIKEN cDNA 2310068J16 gene	non_coding			GO:0003674,GO:0005575,GO:0008150	molecular_function|cellular_component|biological_process
2310069B03Rik	14.9437	14.0731	15.8143	1.12222	0.166351	0.857852	0.948323	Up	0.129266	0.149583	0.512033	0.166414	0.0506465	0.40059	69652	RIKEN cDNA 2310069B03 gene	non_coding			GO:0003674,GO:0005575,GO:0008150	molecular_function|cellular_component|biological_process
2400006E01Rik	9.10028	9.94072	8.25984	0.83281	-0.263941	0.80871	0.928717	Down	0.0744293	0.540257	0.0780409	0.402438	0.116646	0.230654	78648	RIKEN cDNA 2400006E01 gene	non_coding			GO:0003674,GO:0005575,GO:0008150	molecular_function|cellular_component|biological_process
2410002F23Rik	873.806	720.295	1027.32	1.42599	0.511968	0.00045321	0.00706612	Up	12.124	10.8945	14.2479	7.23579	8.2135	7.68297	668661	RIKEN cDNA 2410002F23 gene	protein_coding			GO:0003674,GO:0005575,GO:0008150	molecular_function|cellular_component|biological_process
2410003I16Rik	18.5432	30.422	6.66436	0.21865	-2.1933	0.0012392	0.0158002	Down	0.0714629	0.0202979	0.0749306	0.256679	0.243594	0.166096	102633190	RIKEN cDNA 2410003I16 gene	non_coding			GO:0003674,GO:0005575,GO:0008150	molecular_function|cellular_component|biological_process
2410003L11Rik	67.6672	54.569	80.7653	1.47968	0.56529	0.101474	0.348306	Up	4.68386	3.78364	3.55945	1.89195	3.18204	2.14731	69729	RIKEN cDNA 2410003L11 gene	non_coding			GO:0003674,GO:0005575,GO:0008150	molecular_function|cellular_component|biological_process
2410004B18Rik	904.967	894.88	915.055	1.02261	0.0322505	0.825588	0.934178	Up	18.2193	17.7062	16.7155	14.0988	14.2442	17.29	66421	RIKEN cDNA 2410004B18 gene	protein_coding			GO:0003674,GO:0005654,GO:0008150	molecular_function|nucleoplasm|biological_process
2410004P03Rik	1.99642	3.41096	0.581886	0.169677	-2.55914	0.163035	0.454738	Down	0	0.0132511	0.0146751	0.0324325	0.0493527	0.0650595	73667	RIKEN cDNA 2410004P03 gene	protein_coding			GO:0003674,GO:0005575,GO:0008150	molecular_function|cellular_component|biological_process
2410006H16Rik	687.043	791.149	582.937	0.73689	-0.440479	0.018395	0.116416	Down	39.4761	40.2917	35.2307	41.3101	40.5669	56.5491	69221	RIKEN cDNA 2410006H16 gene	non_coding			GO:0003674,GO:0005575,GO:0008150	molecular_function|cellular_component|biological_process
2410018L13Rik	4.27997	3.0738	5.48614	1.79015	0.840077	0.508575	0.778796	Up	0.149529	0.0707855	0.137186	0.129937	0.0219696	0.0217212	69732	RIKEN cDNA 2410018L13 gene	non_coding			GO:0003674,GO:0005575,GO:0008150	molecular_function|cellular_component|biological_process
2410022M11Rik	78.4349	81.6752	75.1945	0.920644	-0.119284	0.708796	0.884414	Down	0.922025	1.43321	1.21206	1.14802	1.21316	1.08749	100503842	RIKEN cDNA 2410022M11 gene	non_coding			GO:0003674,GO:0005575,GO:0008150	molecular_function|cellular_component|biological_process
2410124H12Rik	5.20696	3.77629	6.63762	1.75555	0.811923	0.587168	0.822218	Up	0.0370399	0.490962	0.310698	0	0.087074	0.344357	76785	RIKEN cDNA 2410124H12 gene	non_coding			GO:0003674,GO:0005575,GO:0008150	molecular_function|cellular_component|biological_process
2500002B13Rik	60.0776	87.5602	32.595	0.372004	-1.42661	7.72692e-05	0.00168415	Down	0.903824	1.18697	1.19224	2.02685	3.18708	2.64281	78353	RIKEN cDNA 2500002B13 gene	non_coding			GO:0003674,GO:0005575,GO:0008150	molecular_function|cellular_component|biological_process
2500004C02Rik	96.993	85.3096	108.676	1.27287	0.348087	0.391663	0.697684	Up	1.41329	1.19378	2.6296	0.834803	1.14004	1.65851	72326	RIKEN cDNA 2500004C02 gene	non_coding			GO:0003674,GO:0005575,GO:0008150	molecular_function|cellular_component|biological_process
2510002D24Rik	362.031	299.094	424.968	1.42083	0.506731	0.00296066	0.0312615	Up	4.28724	3.98132	3.81496	2.18869	2.57755	2.77747	72307	RIKEN cDNA 2510002D24 gene	protein_coding			GO:0003674,GO:0005575,GO:0008150	molecular_function|cellular_component|biological_process
2510003B16Rik	3.94066	4.13955	3.74178	0.902335	-0.148265	0.913886	0.97075	Down	0.239949	0.181743	0.201273	0	0.338445	0.278848	76786	RIKEN cDNA 2510003B16 gene	non_coding			GO:0003674,GO:0005575,GO:0008150	molecular_function|cellular_component|biological_process
2510009E07Rik	709.231	785.278	633.185	0.806194	-0.310801	0.0329248	0.17325	Down	3.36114	3.63549	4.165	4.06546	4.18416	4.01847	72190	RIKEN cDNA 2510009E07 gene	protein_coding			GO:0003674,GO:0005575,GO:0007399	molecular_function|cellular_component|nervous system development
2510022D24Rik	100.907	65.3397	136.474	2.0879	1.06206	0.00532643	0.0478636	Up	3.20668	1.49257	3.83187	1.20387	1.28446	1.10339	66567	RIKEN cDNA 2510022D24 gene	protein_coding			GO:0003674,GO:0005575,GO:0008150	molecular_function|cellular_component|biological_process
2510039O18Rik	2473.51	2529.17	2417.85	0.956062	-0.0648232	0.578194	0.817042	Down	17.9747	16.5709	15.5052	15.8171	15.2448	15.3086	77034	RIKEN cDNA 2510039O18 gene	protein_coding			GO:0003674,GO:0008150,GO:0016020	molecular_function|biological_process|membrane
2600006K01Rik	9.64002	7.23689	12.0431	1.66219	0.733085	0.517492	0.784687	Up	0.015272	0.173511	0.448365	0.123863	0.0538524	0.15973	70319	RIKEN cDNA 2600006K01 gene	non_coding			GO:0003674,GO:0005575,GO:0008150	molecular_function|cellular_component|biological_process
2600014E21Rik	6.34412	9.84313	2.8451	0.290056	-1.7856	0.101801	0.348653	Down	0.0120351	0.00325559	0.00180272	0.0119523	0.0242505	0.0159842	102635707	RIKEN cDNA 2600014E21 gene	non_coding
2610008E11Rik	643.961	612.909	675.014	1.10108	0.138922	0.533054	0.794477	Up	3.97989	4.32152	6.24647	3.65298	4.73646	3.32428	72128	RIKEN cDNA 2610008E11 gene	protein_coding	mmu05168	Herpes simplex virus 1 infection	GO:0000122,GO:0000977,GO:0001227	negative regulation of transcription by RNA polymerase II|RNA polymerase II transcription regulatory region sequence-specific DNA binding|DNA-binding transcription repressor activity, RNA polymerase II-specific			R-MMU-212436,R-MMU-73857,R-MMU-74160	Generic Transcription Pathway|RNA Polymerase II Transcription|Gene expression (Transcription)	zf-C2H2
2610020C07Rik	23.1262	27.0233	19.2291	0.712431	-0.489177	0.363711	0.6743	Down	0.317142	0.277166	0.217424	0.423984	0.358433	0.226803	69918	RIKEN cDNA 2610020C07 gene	non_coding			GO:0003674,GO:0005575,GO:0008150	molecular_function|cellular_component|biological_process
2610027K06Rik	15.3582	16.6949	14.0214	0.840633	-0.250453	0.728471	0.89262	Down	0.327882	0.107046	0.118549	0.183398	0.2525	0.144531	69909	RIKEN cDNA 2610027K06 gene	non_coding			GO:0003674,GO:0005575,GO:0008150	molecular_function|cellular_component|biological_process
2610035D17Rik	15.3054	19.6988	10.9119	0.554057	-0.851893	0.226987	0.541812	Down	0.19923	0.188627	0.149212	0.148394	0.234176	0.479594	72386	RIKEN cDNA 2610035D17 gene	non_coding			GO:0003674,GO:0005575,GO:0008150	molecular_function|cellular_component|biological_process
2610037D02Rik	1.33584	0	2.67168	12.725	3.6696	0.250807	0.567665	Up	0.00724273	0	0.0607534	0	0	0	70040	RIKEN cDNA 2610037D02 gene	non_coding			GO:0003674,GO:0005575,GO:0008150	molecular_function|cellular_component|biological_process
2610042L04Rik	16.6973	19.4963	13.8983	0.712976	-0.488075	0.482103	0.762393	Down	0.0623752	0.0681412	0.100618	0.161219	0.0676766	0.0557594	554327	RIKEN cDNA 2610042L04 gene	protein_coding			GO:0001933,GO:0005515,GO:0005575,GO:0007416,GO:0010821,GO:0060025	negative regulation of protein phosphorylation|protein binding|cellular_component|synapse assembly|regulation of mitochondrion organization|regulation of synaptic activity
2610044O15Rik8	213.992	202.12	225.864	1.11761	0.160419	0.519678	0.786571	Up	4.88652	3.05627	3.6797	2.86517	2.69777	3.61372	72139	RIKEN cDNA 2610044O15 gene	protein_coding			GO:0000122,GO:0000978,GO:0001227,GO:0001817,GO:0002682,GO:0005654	negative regulation of transcription by RNA polymerase II|RNA polymerase II cis-regulatory region sequence-specific DNA binding|DNA-binding transcription repressor activity, RNA polymerase II-specific|regulation of cytokine production|regulation of immune system process|nucleoplasm					zf-C2H2
2610203C22Rik	17.4229	11.8146	23.0313	1.9514	0.964511	0.140548	0.418837	Up	0.696506	0.439625	0.55326	0.366818	0.272892	0.122639	72481	RIKEN cDNA 2610203C22 gene	non_coding			GO:0003674,GO:0005575,GO:0008150	molecular_function|cellular_component|biological_process
2610206C17Rik	12.7768	11.794	13.7596	1.16815	0.224223	0.754681	0.905789	Up	0.229747	0.319029	0.176656	0.230701	0.216037	0.106797	72495	RIKEN cDNA 2610206C17 gene	non_coding			GO:0003674,GO:0005575,GO:0008150	molecular_function|cellular_component|biological_process
2610306M01Rik	85.136	73.375	96.897	1.32061	0.401201	0.16717	0.460079	Up	2.7977	2.67289	3.06679	1.91545	1.58443	2.21676	67170	RIKEN cDNA 2610306M01 gene	non_coding			GO:0003674,GO:0005575,GO:0008150	molecular_function|cellular_component|biological_process
2610307P16Rik	14.5683	10.2207	18.916	1.85024	0.88771	0.194532	0.500605	Up	0.232386	0.247521	0.152289	0.0560941	0.113812	0.13503	72518	RIKEN cDNA 2610307P16 gene	non_coding			GO:0003674,GO:0005575,GO:0008150	molecular_function|cellular_component|biological_process
2610318N02Rik	11.7526	7.60771	15.8975	2.0895	1.06316	0.156872	0.445397	Up	0.17343	0.343329	0.347161	0.127873	0.0926597	0.146579	70458	RIKEN cDNA 2610318N02 gene	protein_coding			GO:0003674,GO:0005575,GO:0008150	molecular_function|cellular_component|biological_process
2610507I01Rik	9.7616	9.47694	10.0463	1.06029	0.0844587	0.911843	0.96984	Up	0.135792	0.0942811	0.0854286	0.0734225	0.117048	0.0736427	72203	RIKEN cDNA 2610507I01 gene	non_coding			GO:0003674,GO:0005575,GO:0008150	molecular_function|cellular_component|biological_process
2610524H06Rik	237.352	223.98	250.723	1.11951	0.162862	0.491777	0.768154	Up	6.345	9.40621	8.31611	6.83567	5.82244	6.43575	330173	RIKEN cDNA 2610524H06 gene	protein_coding			GO:0003674,GO:0005575,GO:0008150	molecular_function|cellular_component|biological_process
2610528J11Rik	1045.72	1007.15	1084.29	1.0765	0.106342	0.598476	0.827718	Up	23.1562	31.1504	30.9646	18.6251	24.1135	27.7304	66451	RIKEN cDNA 2610528J11 gene	protein_coding			GO:0003674,GO:0005768,GO:0005886,GO:0016020	molecular_function|endosome|plasma membrane|membrane
2700003A03Rik	7.96073	6.09417	9.8273	1.61297	0.689721	0.420208	0.719024	Up	0.0421702	0.0648796	0.0718517	0.0427525	0.0309794	0.0245033	102638195	RIKEN cDNA 2700003A03 gene	non_coding			GO:0003674,GO:0005575,GO:0008150	molecular_function|cellular_component|biological_process
2700012I20Rik	8.86659	9.13137	8.60181	0.943334	-0.0841591	0.918402	0.972618	Down	0.322899	0.475557	0.263331	0.415693	0.379538	0.20847	72588	RIKEN cDNA 2700012I20 gene	non_coding			GO:0003674,GO:0005575,GO:0008150	molecular_function|cellular_component|biological_process
2700038G22Rik	46.0199	55.6924	36.3474	0.652986	-0.614875	0.235504	0.550859	Down	1.22854	0.672449	0.523311	0.934127	1.69222	0.669234	67194	RIKEN cDNA 2700038G22 gene	non_coding			GO:0003674,GO:0005575,GO:0008150	molecular_function|cellular_component|biological_process
2700046A07Rik	15.9191	23.4903	8.34787	0.355303	-1.49288	0.0295962	0.161549	Down	0.147951	0.093385	0.116348	0.257133	0.463742	0.171936	78449	RIKEN cDNA 2700046A07 gene	non_coding			GO:0003674,GO:0005575,GO:0008150	molecular_function|cellular_component|biological_process
2700049A03Rik	306.828	308.595	305.061	0.98876	-0.0163073	0.935232	0.978658	Down	1.43999	1.59814	1.55092	1.54242	1.15054	1.4156	76967	RIKEN cDNA 2700049A03 gene	protein_coding			GO:0005515,GO:0005737,GO:0005813,GO:0005814,GO:0005856,GO:0007224,GO:0030030,GO:0036064,GO:0042995,GO:0060271,GO:0070201	protein binding|cytoplasm|centrosome|centriole|cytoskeleton|smoothened signaling pathway|cell projection organization|ciliary basal body|cell projection|cilium assembly|regulation of establishment of protein localization
2700054A10Rik	8.40309	1.90119	14.905	7.84935	2.97257	0.00334423	0.0341265	Up	0.133064	0.103077	0.0761025	0.0140158	0.0142186	0.00702891	72578	RIKEN cDNA 2700054A10 gene	non_coding			GO:0003674,GO:0005575,GO:0008150	molecular_function|cellular_component|biological_process
2700062C07Rik	331.434	312.181	350.687	1.1235	0.168001	0.302112	0.620519	Up	10.6009	10.6399	9.67244	7.79473	8.50659	8.11425	68046	RIKEN cDNA 2700062C07 gene	protein_coding			GO:0003674,GO:0005575,GO:0008150	molecular_function|cellular_component|biological_process
2700068H02Rik	2.69743	4.53013	0.864734	0.190618	-2.39124	0.130129	0.401155	Down	0.0205296	0.019437	0.0215257	0.0237864	0.120653	0.143146	72563	RIKEN cDNA 2700068H02 gene	non_coding			GO:0003674,GO:0005575,GO:0008150	molecular_function|cellular_component|biological_process
2700097O09Rik	189.959	189.946	189.971	0.999945	-7.95412e-05	0.999769	0.999964	Down	4.24694	4.07892	5.11669	3.47759	3.07193	5.33881	72658	RIKEN cDNA 2700097O09 gene	protein_coding			GO:0008168	methyltransferase activity
2810001A02Rik	185.172	214.156	156.189	0.729212	-0.455591	0.0194934	0.121179	Down	7.11745	7.11938	7.50498	8.33974	9.50025	8.5984	72146	RIKEN cDNA 2810001A02 gene	non_coding			GO:0003674,GO:0005575,GO:0008150	molecular_function|cellular_component|biological_process
2810001G20Rik	87.0438	101.346	72.7418	0.717911	-0.478124	0.115037	0.373562	Down	2.13072	2.98454	2.20351	2.67165	3.15631	3.2563	66456	RIKEN cDNA 2810001G20 gene	non_coding			GO:0003674,GO:0005575,GO:0008150	molecular_function|cellular_component|biological_process
2810002D19Rik	45.5911	47.537	43.6453	0.918956	-0.121932	0.747412	0.901291	Down	1.081	0.855686	0.743247	0.923965	0.770699	0.885548	66457	RIKEN cDNA 2810002D19 gene	non_coding			GO:0003674,GO:0005575,GO:0008150	molecular_function|cellular_component|biological_process
2810004N23Rik	824.629	788.467	860.792	1.09173	0.126619	0.346745	0.659164	Up	18.9531	19.5659	18.1369	13.8902	16.2161	15.9664	66523	RIKEN cDNA 2810004N23 gene	protein_coding			GO:0003674,GO:0005634,GO:0005694,GO:0008150,GO:0032040,GO:0042274	molecular_function|nucleus|chromosome|biological_process|small-subunit processome|ribosomal small subunit biogenesis
2810013P06Rik	482.331	539.164	425.499	0.789206	-0.341526	0.0128225	0.0910801	Down	6.48382	6.13875	6.48571	7.19688	7.24007	7.00749	100503178	RIKEN cDNA 2810013P06 gene	non_coding			GO:0003674,GO:0005575,GO:0008150	molecular_function|cellular_component|biological_process
2810021J22Rik	407.461	366.523	448.399	1.22339	0.29089	0.103045	0.35069	Up	2.67818	2.32968	2.504	1.84278	2.08537	1.51123	69944	RIKEN cDNA 2810021J22 gene	protein_coding	mmu05168	Herpes simplex virus 1 infection	GO:0000122,GO:0000977,GO:0001227	negative regulation of transcription by RNA polymerase II|RNA polymerase II transcription regulatory region sequence-specific DNA binding|DNA-binding transcription repressor activity, RNA polymerase II-specific			R-MMU-212436,R-MMU-73857,R-MMU-74160	Generic Transcription Pathway|RNA Polymerase II Transcription|Gene expression (Transcription)	zf-C2H2
2810025M15Rik	313.623	263.318	363.928	1.38176	0.466504	0.0101354	0.076396	Up	8.63397	9.57164	9.51481	5.10391	6.60165	6.11746	69953	RIKEN cDNA 2810025M15 gene	non_coding			GO:0003674,GO:0005575,GO:0008150	molecular_function|cellular_component|biological_process
2810029C07Rik	130.8	163.367	98.2333	0.601318	-0.7338	0.00104458	0.013758	Down	1.58813	1.4399	1.5523	2.19873	2.19891	2.34609	100504687	RIKEN cDNA 2810029C07 gene	non_coding			GO:0003674,GO:0005575,GO:0008150	molecular_function|cellular_component|biological_process
2810030D12Rik	16.2539	17.3823	15.1256	0.868195	-0.203909	0.784382	0.918342	Down	0.342093	0.728745	1.16575	0.396362	1.20629	0.695714	78335	RIKEN cDNA 2810030D12 gene	non_coding			GO:0003674,GO:0005575,GO:0008150	molecular_function|cellular_component|biological_process
2810032G03Rik	29.1622	23.8792	34.4453	1.44053	0.5266	0.277908	0.596908	Up	0.47698	0.402774	0.662328	0.253919	0.40912	0.284643	72669	RIKEN cDNA 2810032G03 gene	non_coding			GO:0003674,GO:0005575,GO:0008150	molecular_function|cellular_component|biological_process
2810039B14Rik	12.2463	6.41071	18.0819	2.81525	1.49326	0.0741901	0.289157	Up	0.360896	0.356546	0.263241	0.0181804	0.147548	0.145879	72665	RIKEN cDNA 2810039B14 gene	protein_coding			GO:0003674,GO:0005575,GO:0008150	molecular_function|cellular_component|biological_process
2810047C21Rik1	19.6163	23.0493	16.1834	0.701427	-0.511636	0.51324	0.78222	Down	0.0428173	0.243231	0.188559	0.109141	0.332163	0.169179	105242405	RIKEN cDNA 2810047C21 gene 1	non_coding			GO:0003674,GO:0005575,GO:0008150	molecular_function|cellular_component|biological_process
2810403D21Rik	45.5107	53.9788	37.0426	0.686811	-0.542016	0.161299	0.452085	Down	1.30838	1.11487	0.932868	1.42498	1.19954	1.70294	69964	RIKEN cDNA 2810403D21 gene	non_coding			GO:0003674,GO:0005575,GO:0009611	molecular_function|cellular_component|response to wounding
2810408A11Rik	14.4476	9.88899	19.0062	1.92277	0.943189	0.180944	0.481771	Up	0.35165	0.202139	0.276535	0.160064	0.16238	0.0583796	70419	RIKEN cDNA 2810408A11 gene	protein_coding			GO:0004864,GO:0043666	protein phosphatase inhibitor activity|regulation of phosphoprotein phosphatase activity
2810408B13Rik	17.6328	12.4843	22.7812	1.82217	0.865658	0.156603	0.445273	Up	0.0441275	0.0386843	0.0462688	0.0113617	0.0268944	0.024691	76371	RIKEN cDNA 2810408B13 gene	protein_coding			GO:0003674,GO:0005575,GO:0008150	molecular_function|cellular_component|biological_process
2810408I11Rik	35.3384	32.5283	38.1485	1.17153	0.228394	0.672608	0.867512	Up	0.922103	1.99051	1.93369	0.683766	1.6908	1.32877	69941	RIKEN cDNA 2810408I11 gene	non_coding			GO:0003674,GO:0005575,GO:0008150	molecular_function|cellular_component|biological_process
2810414N06Rik	17.8121	18.9753	16.6489	0.877813	-0.188015	0.763608	0.908964	Down	0.465775	0.288337	0.281755	0.352858	0.484305	0.208186	102640772	RIKEN cDNA 2810414N06 gene	non_coding			GO:0003674,GO:0005575,GO:0008150	molecular_function|cellular_component|biological_process
2810429I04Rik	2.51866	3.025	2.01232	0.664848	-0.588904	0.686522	0.873368	Down	0.045342	0.0286193	0.0316948	0.0350234	0.0888255	0.0175642	76937	RIKEN cDNA 2810429I04 gene	non_coding			GO:0005575,GO:0035198,GO:0060038	cellular_component|miRNA binding|cardiac muscle cell proliferation
2810433D01Rik	26.6295	39.4074	13.8515	0.351139	-1.50989	0.0025266	0.027628	Down	0.295709	0.298636	0.351399	0.571033	0.950047	0.870573	77132	RIKEN cDNA 2810433D01 gene	non_coding			GO:0003674,GO:0005575,GO:0008150	molecular_function|cellular_component|biological_process
2810442N19Rik	1.62623	2.67101	0.581452	0.217102	-2.20356	0.325243	0.64292	Down	0.0286163	0	0.0300049	0.132624	0.100907	0	72753	RIKEN cDNA 2810442N19 gene	non_coding			GO:0003674,GO:0005575,GO:0008150	molecular_function|cellular_component|biological_process
2810454H06Rik	11.523	7.18601	15.8599	2.20442	1.1404	0.20474	0.512598	Up	0.251347	0.0793236	0.185457	0.0539298	0.131305	0.0216366	72813	RIKEN cDNA 2810454H06 gene	non_coding			GO:0003674,GO:0005575,GO:0008150	molecular_function|cellular_component|biological_process
2810459M11Rik	395.383	346.897	443.869	1.2795	0.355585	0.747236	0.901187	Up	0.339487	5.13523	6.57284	2.20455	1.46622	4.71592	72792	RIKEN cDNA 2810459M11 gene	protein_coding			GO:0005515,GO:0005575,GO:0008150	protein binding|cellular_component|biological_process
2900005J15Rik	12.4115	9.48157	15.3415	1.61624	0.692643	0.369519	0.679203	Up	0.284586	0.110226	0.298396	0.119903	0.182457	0.0751641	67261	RIKEN cDNA 2900005J15 gene	non_coding			GO:0003674,GO:0005575,GO:0008150	molecular_function|cellular_component|biological_process
2900009J06Rik	6.28564	5.30667	7.26461	1.36669	0.450681	0.693044	0.876046	Up	0.170033	0.536612	0.713133	0.131338	0.133238	0.658657	100502745	RIKEN cDNA 2900009J06 gene	non_coding			GO:0003674,GO:0005575,GO:0008150	molecular_function|cellular_component|biological_process
2900024J01Rik	2.90946	3.80617	2.01275	0.529407	-0.917552	0.483369	0.762932	Down	0.0399975	0.0568033	0.0419384	0.0926854	0.07052	0.0697225	102634584	RIKEN cDNA 2900024J01 gene	non_coding			GO:0003674,GO:0005575,GO:0008150	molecular_function|cellular_component|biological_process
2900026A02Rik	3855.83	4188.69	3522.97	0.841096	-0.249657	0.201421	0.508376	Down	10.5364	7.81736	7.00518	9.51852	10.037	7.12471	243219	RIKEN cDNA 2900026A02 gene	protein_coding			GO:0003674,GO:0005575,GO:0008150	molecular_function|cellular_component|biological_process
2900041M22Rik	6.11755	2.66175	9.57336	3.5947	1.84587	0.0880676	0.321588	Up	0.21524	0.129681	0.307751	0.0453427	0.0229995	0.0909575	78403	RIKEN cDNA 2900041M22 gene	non_coding			GO:0003674,GO:0005575,GO:0008150	molecular_function|cellular_component|biological_process
2900052L18Rik	26.7467	26.4686	27.0247	1.01904	0.0272122	0.963185	0.989065	Up	0.102641	0.105629	0.210564	0.0723883	0.188835	0.103722	102640779	RIKEN cDNA 2900052L18 gene	non_coding			GO:0003674,GO:0005575,GO:0008150	molecular_function|cellular_component|biological_process
2900060B14Rik	4.60626	4.55916	4.65335	1.01842	0.0263381	0.98048	0.994207	Up	0.176203	0.166826	0.369507	0.204156	0.207111	0.204769	68204	RIKEN cDNA 2900060B14 gene	non_coding			GO:0003674,GO:0005575,GO:0008150	molecular_function|cellular_component|biological_process
2900076A07Rik	113.823	117.354	110.292	0.93929	-0.0903576	0.776288	0.914095	Down	4.19786	2.54248	5.11357	3.39751	3.51924	4.19685	100504421	RIKEN cDNA 2900076A07 gene	non_coding			GO:0003674,GO:0005575,GO:0008150	molecular_function|cellular_component|biological_process
2900089D17Rik	26.4397	20.8891	31.9903	1.52955	0.613109	0.281274	0.600022	Up	0.105671	0.0774557	0.196578	0.0631918	0.0600997	0.0950721	67277	RIKEN cDNA 2900089D17 gene	non_coding			GO:0003674,GO:0005575,GO:0008150	molecular_function|cellular_component|biological_process
2900093K20Rik	37.4996	35.7224	39.2768	1.09911	0.136335	0.748597	0.901849	Up	1.60193	2.1065	2.33287	1.54672	1.35989	1.96505	108168734	RIKEN cDNA 2900093K20 gene	non_coding			GO:0003674,GO:0005575,GO:0008150	molecular_function|cellular_component|biological_process
3010001F23Rik	5.8586	6.82739	4.8898	0.716222	-0.481522	0.624753	0.842408	Down	0.137209	0.129907	0.119889	0.158976	0.241914	0.0797262	75693	RIKEN cDNA 3010001F23 gene	non_coding			GO:0003674,GO:0005575,GO:0008150	molecular_function|cellular_component|biological_process
3010003L21Rik	28.9707	20.8555	37.0859	1.77623	0.828818	0.127144	0.395741	Up	0.583743	0.481821	0.863173	0.208107	0.263898	0.487039	109163	RIKEN cDNA 3010003L21 gene	non_coding			GO:0003674,GO:0005575,GO:0008150	molecular_function|cellular_component|biological_process
3110009E18Rik	59.6452	59.3719	59.9184	1.00854	0.012264	0.976899	0.993316	Up	0.344308	0.321393	0.340677	0.146087	0.381902	0.360677	73103	RIKEN cDNA 3110009E18 gene	protein_coding			GO:0003674,GO:0005575,GO:0008150	molecular_function|cellular_component|biological_process
3110021A11Rik	3.05025	1.51061	4.58989	3.03354	1.601	0.304845	0.622058	Up	0.282778	0.089243	0.131778	0.0364042	0.110793	0	67289	RIKEN cDNA 3110021A11 gene	non_coding			GO:0003674,GO:0005575,GO:0008150	molecular_function|cellular_component|biological_process
3110040N11Rik	362.342	347.124	377.559	1.08737	0.120849	0.525608	0.790794	Up	8.06763	9.38416	9.90923	6.19118	8.10343	8.0605	67290	RIKEN cDNA 3110040N11 gene	protein_coding			GO:0003674,GO:0005737,GO:0008150	molecular_function|cytoplasm|biological_process
3110045C21Rik	6.21047	2.65797	9.76297	3.6742	1.87743	0.0649795	0.266037	Up	0.347555	0.219373	0.218652	0.0536922	0.0544692	0.0807798	67303	RIKEN cDNA 3110045C21 gene	non_coding			GO:0003674,GO:0005575,GO:0008150	molecular_function|cellular_component|biological_process
3110053B16Rik	117.1	111.548	122.652	1.09972	0.137132	0.6177	0.838991	Up	1.56538	1.64168	1.90648	1.61839	1.10397	1.38535	382686	RIKEN cDNA 3110053B16 gene	non_coding			GO:0003674,GO:0005575,GO:0008150	molecular_function|cellular_component|biological_process
3110056K07Rik	173.992	180.448	167.537	0.928113	-0.107627	0.683442	0.872118	Down	3.77346	2.4131	3.45332	2.3778	3.63776	3.17349	73204	RIKEN cDNA 3110056K07 gene	non_coding			GO:0003674,GO:0005575,GO:0008150	molecular_function|cellular_component|biological_process
3110070M22Rik	24.8863	25.8583	23.9144	0.925035	-0.11242	0.816581	0.930679	Down	0.629482	0.640128	0.660027	0.70233	0.657687	0.487687	67304	RIKEN cDNA 3110070M22 gene	non_coding			GO:0003674,GO:0005575,GO:0008150	molecular_function|cellular_component|biological_process
3110082I17Rik	168.839	136.314	201.364	1.47706	0.56273	0.0105242	0.0783803	Up	3.08582	3.26071	3.25	1.70787	1.82974	2.22529	73212	RIKEN cDNA 3110082I17 gene	protein_coding			GO:0003674,GO:0005575,GO:0008150	molecular_function|cellular_component|biological_process
3110083C13Rik	22.1951	19.8326	24.5575	1.23886	0.309019	0.574051	0.814848	Up	0.809642	0.738162	1.00614	0.833851	0.422959	0.557568	73208	RIKEN cDNA 3110083C13 gene	non_coding			GO:0003674,GO:0005575,GO:0008150	molecular_function|cellular_component|biological_process
3300002I08Rik	357.88	403.444	312.316	0.77428	-0.369072	0.42436	0.721607	Down	0.759861	0.365942	0.173148	0.551813	0.651223	0.279515	69277	RIKEN cDNA 3300002I08 gene	protein_coding			GO:0003674,GO:0005575,GO:0008150	molecular_function|cellular_component|biological_process
3300005D01Rik	90.8212	129.179	52.4632	0.406103	-1.30008	0.00584211	0.0512744	Down	0.636416	1.76877	1.29154	2.28349	1.78566	4.05581	78512	RIKEN cDNA 3300005D01 gene	non_coding			GO:0009611	response to wounding
3425401B19Rik	22.4695	25.8654	19.0736	0.737231	-0.439811	0.52586	0.790812	Down	0.0518267	0.0946322	0.0970385	0.128675	0.134889	0.0301143	100504518	RIKEN cDNA 3425401B19 gene	protein_coding			GO:0003674,GO:0005737,GO:0030018,GO:0070886	molecular_function|cytoplasm|Z disc|positive regulation of calcineurin-NFAT signaling cascade
3632454L22Rik	128.548	141.395	115.702	0.818407	-0.289109	0.316326	0.634272	Down	0.80679	0.649987	0.551699	0.59222	0.936527	0.652232	320606	RIKEN cDNA 3632454L22 gene	non_coding			GO:0003674,GO:0005575,GO:0008150	molecular_function|cellular_component|biological_process
3830403N18Rik	89.9071	126.927	52.887	0.416289	-1.26434	0.0017894	0.0210343	Down	0.829054	0.930966	1.779	3.3285	1.97161	2.17338	70691	RIKEN cDNA 3830403N18 gene	protein_coding			GO:0000795,GO:0002244,GO:0003674,GO:0007286,GO:0051321	synaptonemal complex|hematopoietic progenitor cell differentiation|molecular_function|spermatid development|meiotic cell cycle
3830406C13Rik	465.691	435.061	496.321	1.14059	0.189779	0.240999	0.556793	Up	1.87211	1.75067	2.0354	1.29231	1.4541	1.64795	218734	RIKEN cDNA 3830406C13 gene	protein_coding			GO:0003674,GO:0005575,GO:0008150,GO:0042995	molecular_function|cellular_component|biological_process|cell projection
3830408C21Rik	22.2267	15.9693	28.4841	1.782	0.833496	0.158614	0.448258	Up	0.415675	0.262369	0.697352	0.240809	0.211721	0.225429	100040322	RIKEN cDNA 3830408C21 gene	non_coding			GO:0003674,GO:0005575,GO:0008150	molecular_function|cellular_component|biological_process
3830432H09Rik	20.4168	29.6691	11.1645	0.377071	-1.40709	0.0169375	0.110448	Down	0.152517	0.175344	0.0913818	0.391292	0.35854	0.240544	320069	RIKEN cDNA 3830432H09 gene	non_coding			GO:0003674,GO:0005575,GO:0008150	molecular_function|cellular_component|biological_process
3930402G23Rik	29.4823	41.4331	17.5314	0.422461	-1.24311	0.106777	0.358323	Down	0.0341094	0.169544	0.31294	0.306284	0.190439	0.584676	665306	RIKEN cDNA 3930402G23 gene	non_coding			GO:0003674,GO:0005575,GO:0008150	molecular_function|cellular_component|biological_process
4631405J19Rik	3.8063	4.13661	3.47599	0.838491	-0.254133	0.87674	0.956404	Down	0	0.141585	0.112	0.0247525	0.225996	0.0248267	433456	RIKEN cDNA 4631405J19 gene	non_coding			GO:0003674,GO:0005575,GO:0008150	molecular_function|cellular_component|biological_process
4632404H12Rik	39.108	33.3957	44.8203	1.34089	0.423189	0.305036	0.622321	Up	0.472319	0.345934	0.569991	0.268461	0.335195	0.310692	74034	RIKEN cDNA 4632404H12 gene	non_coding			GO:0003674,GO:0005575,GO:0008150	molecular_function|cellular_component|biological_process
4632427E13Rik	12.7313	11.3764	14.0862	1.23808	0.308109	0.657164	0.860094	Up	0.825509	0.521051	0.577044	0.318822	0.415847	0.639557	666737	RIKEN cDNA 4632427E13 gene	non_coding			GO:0003674,GO:0005575,GO:0008150	molecular_function|cellular_component|biological_process
4632428C04Rik	19.1233	17.8284	20.4182	1.14315	0.193017	0.781266	0.916666	Up	0.227457	0.102549	0.442918	0.150595	0.190967	0.251744	100043102	RIKEN cDNA 4632428C04 gene	non_coding			GO:0003674,GO:0005575,GO:0008150	molecular_function|cellular_component|biological_process
4732416N19Rik	10.865	10.6777	11.0524	1.03419	0.0485009	0.95068	0.985015	Up	0.381827	0.497072	0.950844	0.7189	0.392702	0.443727	320737	RIKEN cDNA 4732416N19 gene	non_coding			GO:0003674,GO:0005575,GO:0008150	molecular_function|cellular_component|biological_process
4732419C18Rik	42.5451	42.237	42.8532	1.01518	0.0217316	0.959982	0.98795	Up	0.596707	0.294757	0.398973	0.420833	0.31511	0.381896	100042484	RIKEN cDNA 4732419C18 gene	non_coding			GO:0003674,GO:0005575,GO:0008150	molecular_function|cellular_component|biological_process
4732471J01Rik	7.99627	8.74542	7.24712	0.827871	-0.272522	0.775067	0.91409	Down	0.0486107	0.0345177	0.070083	0.0704028	0.0785638	0.0141228	654804	RIKEN cDNA 4732471J01 gene	non_coding			GO:0003674,GO:0005575,GO:0008150	molecular_function|cellular_component|biological_process
4732491K20Rik	64.2882	62.0627	66.5137	1.07118	0.0992017	0.811923	0.929424	Up	0.82027	0.462832	0.634195	0.297599	0.652506	0.635499	224523	RIKEN cDNA 4732491K20 gene	non_coding			GO:0003674,GO:0005575,GO:0008150	molecular_function|cellular_component|biological_process
4831440E17Rik	44.2037	25.3541	63.0533	2.48379	1.31255	0.00773547	0.0634569	Up	0.455456	0.266183	0.512931	0.104239	0.231322	0.104551	320965	RIKEN cDNA 4831440E17 gene	non_coding			GO:0003674,GO:0005575,GO:0008150	molecular_function|cellular_component|biological_process
4833407H14Rik	19.5161	25.0354	13.9969	0.559834	-0.83693	0.218924	0.531613	Down	0.324939	0.533252	0.18171	0.376487	0.43286	0.855929	73899	RIKEN cDNA 4833407H14 gene	non_coding			GO:0003674,GO:0005575,GO:0008150	molecular_function|cellular_component|biological_process
4833411C07Rik	4.74282	5.68127	3.80437	0.667077	-0.584074	0.635722	0.848086	Down	0.0437577	0.0621434	0.183524	0.0506994	0.0771496	0.254257	71624	RIKEN cDNA 4833411C07 gene	non_coding
4833412C05Rik	12.7457	13.6531	11.8383	0.866217	-0.207199	0.752441	0.904243	Down	0.33996	0.275887	0.381918	0.281351	0.399592	0.338634	73904	RIKEN cDNA 4833412C05 gene	non_coding			GO:0003674,GO:0005575,GO:0008150	molecular_function|cellular_component|biological_process
4833417C18Rik	3.98071	3.0738	4.88763	1.59474	0.673323	0.63984	0.850554	Up	0.219319	0.018877	0.104528	0.138606	0.0234354	0.0231704	73906	RIKEN cDNA 4833417C18 gene	non_coding			GO:0003674,GO:0005575,GO:0008150	molecular_function|cellular_component|biological_process
4833418N02Rik	30.5619	23.1031	38.0207	1.64448	0.717629	0.153722	0.440736	Up	0.635973	0.862507	0.756946	0.238983	0.424272	0.559299	74597	RIKEN cDNA 4833418N02 gene	non_coding			GO:0003674,GO:0005575,GO:0008150	molecular_function|cellular_component|biological_process
4833419F23Rik	36.7122	36.7646	36.6599	0.996343	-0.0052857	0.990651	0.997646	Down	1.49253	0.876121	1.43976	0.795479	1.22803	1.3529	73915	RIKEN cDNA 4833419F23 gene	non_coding			GO:0003674,GO:0005575,GO:0008150	molecular_function|cellular_component|biological_process
4833420G17Rik	1008.53	1085.75	931.318	0.857615	-0.221599	0.153359	0.44015	Down	9.30571	7.68709	10.3971	8.30741	10.3602	9.60286	67392	RIKEN cDNA 4833420G17 gene	protein_coding			GO:0003674,GO:0005575,GO:0008150	molecular_function|cellular_component|biological_process
4833422C13Rik	45.7068	86.2895	5.12408	0.0596593	-4.06711	8.34212e-09	6.30936e-07	Down	0.060865	0.0132983	0.00981822	0.499069	0.550316	0.190433	373852	RIKEN cDNA 4833422C13 gene	non_coding			GO:0003674,GO:0005575,GO:0008150	molecular_function|cellular_component|biological_process
4833438C02Rik	65.4234	61.4207	69.426	1.1294	0.175559	0.650906	0.855887	Up	1.10312	0.960859	1.48051	0.630538	0.864409	1.28195	100503392	RIKEN cDNA 4833438C02 gene	non_coding			GO:0003674,GO:0005575,GO:0008150	molecular_function|cellular_component|biological_process
4833439F03Rik	25.013	19.3659	30.6601	1.58211	0.66185	0.221835	0.535258	Up	0.288505	0.399221	0.488661	0.23142	0.28694	0.141848	105246973	RIKEN cDNA 4833439F03 gene	non_coding			GO:0003674,GO:0005575,GO:0008150	molecular_function|cellular_component|biological_process
4833439L19Rik	2224.29	2108.81	2339.77	1.10952	0.14994	0.307903	0.625232	Up	15.735	17.2953	17.8295	13.2366	12.0174	15.3648	97820	RIKEN cDNA 4833439L19 gene	protein_coding			GO:0003674,GO:0005737,GO:0008150,GO:0016491	molecular_function|cytoplasm|biological_process|oxidoreductase activity
4833447I15Rik	11.0963	7.22639	14.9663	2.07219	1.05115	0.175549	0.473315	Up	0.579723	0.349282	0.442076	0.244251	0.247786	0.0918689	74844	RIKEN cDNA 4833447I15 gene	non_coding			GO:0003674,GO:0005575,GO:0008150	molecular_function|cellular_component|biological_process
4921507P07Rik	39.1526	31.6464	46.6589	1.47566	0.561361	0.219479	0.532254	Up	0.585173	0.342195	0.469199	0.378885	0.212414	0.240013	70821	RIKEN cDNA 4921507P07 gene	protein_coding			GO:0003674,GO:0005737,GO:0005813,GO:0005856,GO:0008150	molecular_function|cytoplasm|centrosome|cytoskeleton|biological_process
4921515G04Rik	4.35935	3.02415	5.69455	1.88348	0.913397	0.481788	0.762332	Up	0.0191854	0.0635752	0.0100582	0.00555723	0.016913	0.0222956	115488525	RIKEN cDNA 4921515G04 gene	non_coding			GO:0003674,GO:0005575,GO:0008150	molecular_function|cellular_component|biological_process
4921517D16Rik	1.58194	1.15199	2.01188	1.7534	0.810158	0.676536	0.869809	Up	0.0125215	0.00296379	0.00656457	0.00725397	0	0.00363787	70876	RIKEN cDNA 4921517D16 gene	non_coding			GO:0003674,GO:0005575,GO:0008150	molecular_function|cellular_component|biological_process
4921524J17Rik	890.397	832.431	948.363	1.13925	0.188089	0.125414	0.392597	Up	19.4229	16.6877	18.0833	13.3917	14.8064	13.93	66714	RIKEN cDNA 4921524J17 gene	protein_coding			GO:0003674,GO:0005575,GO:0008150	molecular_function|cellular_component|biological_process
4921525O09Rik	3.27753	4.54318	2.01188	0.442841	-1.17514	0.373711	0.683072	Down	0.0321496	0.00760965	0.0168548	0.0279373	0.0566833	0.0280211	74050	RIKEN cDNA 4921525O09 gene	non_coding			GO:0003674,GO:0005575,GO:0008150	molecular_function|cellular_component|biological_process
4921531C22Rik	74.8488	86.3124	63.3853	0.734034	-0.44608	0.242727	0.558872	Down	1.27005	0.731933	1.04218	0.831736	1.70377	1.13905	66730	RIKEN cDNA 4921531C22 gene	non_coding			GO:0003674,GO:0005575,GO:0008150	molecular_function|cellular_component|biological_process
4921536K21Rik	17.35	13.5883	21.1118	1.55072	0.63294	0.369286	0.67888	Up	0.281266	0.15217	0.305447	0.0581939	0.236144	0.128411	67430	RIKEN cDNA 4921536K21 gene	protein_coding			GO:0003674,GO:0005575,GO:0008150	molecular_function|cellular_component|biological_process
4930405A21Rik	56.1898	54.0628	58.3168	1.07829	0.108742	0.812756	0.929424	Up	1.95586	1.85177	1.52422	0.918703	2.45426	1.04432	74846	RIKEN cDNA 4930405A21 gene	non_coding			GO:0003674,GO:0005575,GO:0008150	molecular_function|cellular_component|biological_process
4930405D11Rik	41.4645	45.4279	37.5012	0.82533	-0.276958	0.875591	0.955976	Down	0	1.1598	2.21361	0.362382	0.643347	2.63515	73922	RIKEN cDNA 4930405D11 gene	non_coding			GO:0003674,GO:0005575,GO:0008150	molecular_function|cellular_component|biological_process
4930412C18Rik	13.1138	14.8257	11.4018	0.770718	-0.375724	0.615716	0.838094	Down	0.0927632	0.13174	0.0347373	0.107479	0.101246	0.0924012	320152	RIKEN cDNA 4930412C18 gene	non_coding			GO:0003674,GO:0005575,GO:0008150	molecular_function|cellular_component|biological_process
4930412M03Rik	3.47422	3.42779	3.52066	1.02406	0.034307	0.979649	0.993964	Up	0.0261588	0.00825557	0.0731418	0.0404116	0.0307473	0.0202664	100504140	RIKEN cDNA 4930412M03 gene	non_coding			GO:0003674,GO:0005575,GO:0008150	molecular_function|cellular_component|biological_process
4930413G21Rik	5.10583	2.66638	7.54529	2.82965	1.50062	0.174837	0.472646	Up	0.16882	0.0887974	0.236015	0.0652004	0.044096	0.0435973	73951	RIKEN cDNA 4930413G21 gene	non_coding			GO:0003674,GO:0005575,GO:0008150	molecular_function|cellular_component|biological_process
4930417H01Rik	5.27071	1.89278	8.64864	4.56076	2.18927	0.0550977	0.239733	Up	0.0568701	0.0999951	0.0851853	0.00941314	0.0190987	0.0188827	414106	RIKEN cDNA 4930417H01 gene	non_coding			GO:0003674,GO:0005575,GO:0008150	molecular_function|cellular_component|biological_process
4930426I24Rik	8.57349	9.16249	7.9845	0.873397	-0.19529	0.850523	0.94534	Down	0.232318	0.0439908	0.0487181	0.148045	0.0409602	0.13499	100504512	RIKEN cDNA 4930426I24 gene	non_coding			GO:0003674,GO:0005575,GO:0008150	molecular_function|cellular_component|biological_process
4930426L09Rik	10.0124	14.0184	6.0063	0.429154	-1.22043	0.126176	0.394081	Down	0.159277	0.134045	0.0742247	0.164039	0.270422	0.329063	74629	RIKEN cDNA 4930426L09 gene	non_coding			GO:0003674,GO:0005575,GO:0008150	molecular_function|cellular_component|biological_process
4930429B21Rik	13.4026	13.6127	13.1926	0.968937	-0.0455252	0.948293	0.983665	Down	0.215781	0.242604	0.155548	0.109381	0.285335	0.172399	67576	RIKEN cDNA 4930429B21 gene	non_coding			GO:0003674,GO:0005575,GO:0008150	molecular_function|cellular_component|biological_process
4930431P22Rik	9.55157	9.90412	9.19901	0.929931	-0.104804	0.891763	0.962271	Down	0.331957	0.488896	0.348065	0.470089	0.303477	0.342908	73883	RIKEN cDNA 4930431P22 gene	non_coding			GO:0003674,GO:0005575,GO:0008150	molecular_function|cellular_component|biological_process
4930438A08Rik	2.2317	4.16479	0.298604	0.0743308	-3.7499	0.0606075	0.254073	Down	0	0	0.0112779	0.0373869	0.0758559	0.0249994	73988	RIKEN cDNA 4930438A08 gene	protein_coding	mmu00250,mmu00270,mmu00280,mmu00350,mmu00360,mmu00380,mmu00400	Alanine, aspartate and glutamate metabolism|Cysteine and methionine metabolism|Valine, leucine and isoleucine degradation|Tyrosine metabolism|Phenylalanine metabolism|Tryptophan metabolism|Phenylalanine, tyrosine and tryptophan biosynthesis	GO:0001716,GO:0005575,GO:0009063,GO:0046592	L-amino-acid oxidase activity|cellular_component|amino acid catabolic process|polyamine oxidase activity
4930444M15Rik	11.8736	15.9011	7.84606	0.492348	-1.02225	0.239721	0.55528	Down	0.063446	0.150174	0.216205	0.110267	0.205081	0.460822	75789	RIKEN cDNA 4930444M15 gene	non_coding			GO:0003674,GO:0005575,GO:0008150	molecular_function|cellular_component|biological_process
4930444P10Rik	3.19935	0.378386	6.02032	14.7514	3.88278	0.0325404	0.172014	Up	0.170676	0.0538643	0.0745659	0	0	0.0165288	75799	RIKEN cDNA 4930444P10 gene	protein_coding			GO:0003674,GO:0005575,GO:0008150	molecular_function|cellular_component|biological_process
4930445E18Rik	131.502	110.002	153.002	1.39126	0.47639	0.123157	0.388663	Up	0.509622	0.440254	0.293031	0.23401	0.331251	0.229254	78115	RIKEN cDNA 4930445E18 gene	non_coding			GO:0003674,GO:0005575,GO:0008150	molecular_function|cellular_component|biological_process
4930445K14Rik	56.5226	45.664	67.3813	1.4754	0.561103	0.127048	0.395629	Up	1.11347	0.901627	1.41329	0.76388	0.551064	0.732119	105244413	RIKEN cDNA 4930445K14 gene	non_coding			GO:0003674,GO:0005575,GO:0008150	molecular_function|cellular_component|biological_process
4930447C04Rik	64.0417	81.1702	46.9133	0.57792	-0.791058	0.0164377	0.108074	Down	0.551473	0.399751	0.451744	0.609007	0.850769	0.690943	75801	RIKEN cDNA 4930447C04 gene	protein_coding			GO:0000801,GO:0003674,GO:0005694,GO:0006310,GO:0007129,GO:0007130,GO:0007275,GO:0007283,GO:0010705,GO:0030154,GO:0048477,GO:0051090,GO:0051321	central element|molecular_function|chromosome|DNA recombination|homologous chromosome pairing at meiosis|synaptonemal complex assembly|multicellular organism development|spermatogenesis|meiotic DNA double-strand break processing involved in reciprocal meiotic recombination|cell differentiation|oogenesis|regulation of DNA-binding transcription factor activity|meiotic cell cycle
4930447F24Rik	118.59	96.1554	141.025	1.46577	0.551655	0.0967689	0.339695	Up	3.18035	2.64131	3.27617	1.0559	2.1205	2.33427	76873	RIKEN cDNA 4930447F24 gene	non_coding			GO:0003674,GO:0005575,GO:0008150	molecular_function|cellular_component|biological_process
4930447K03Rik	1.51586	3.03172	0	0.0524372	-4.25327	0.0972071	0.340398	Down	0	0	0	0.0294969	0.0299238	0.177512	432745	RIKEN cDNA 4930447K03 gene	non_coding			GO:0003674,GO:0005575,GO:0008150	molecular_function|cellular_component|biological_process
4930448E22Rik	2.75386	1.49841	4.00931	2.66647	1.41493	0.431305	0.725565	Up	0.0734591	0.0579581	0.0385118	0	0.0575629	0	102633321	RIKEN cDNA 4930448E22 gene	non_coding			GO:0003674,GO:0005575,GO:0008150	molecular_function|cellular_component|biological_process
4930453L07Rik	1.62801	2.65882	0.597208	0.222337	-2.16918	0.392437	0.698377	Down	0	0	0.0383245	0.0635239	0.0859243	0	74688	RIKEN cDNA 4930453L07 gene	non_coding			GO:0003674,GO:0005575,GO:0008150	molecular_function|cellular_component|biological_process
4930453N24Rik	960.812	1017.77	903.857	0.888135	-0.17115	0.234353	0.549732	Down	5.25967	4.32024	4.22978	4.22958	5.00592	4.54455	67609	RIKEN cDNA 4930453N24 gene	protein_coding			GO:0003674,GO:0005634,GO:0006915,GO:0043065	molecular_function|nucleus|apoptotic process|positive regulation of apoptotic process
4930471E19Rik	10.9452	8.69701	13.1934	1.5163	0.600552	0.50043	0.77398	Up	0.216066	0.306851	0.178004	0.0357633	0.108843	0.269029	74912	RIKEN cDNA 4930471E19 gene	non_coding			GO:0003674,GO:0005575,GO:0008150	molecular_function|cellular_component|biological_process
4930473A02Rik	2.58117	3.46438	1.69796	0.49252	-1.02175	0.600755	0.829148	Down	0.0746582	0.0353425	0	0.151378	0	0.0433807	321014	RIKEN cDNA 4930473A02 gene	non_coding			GO:0003674,GO:0005575,GO:0008150	molecular_function|cellular_component|biological_process
4930480K23Rik	24.108	20.0466	28.1694	1.40446	0.49002	0.458181	0.745963	Up	0.343174	0.139248	0.205615	0.10549	0.255193	0.0732504	75016	RIKEN cDNA 4930480K23 gene	non_coding			GO:0003674,GO:0005575,GO:0008150	molecular_function|cellular_component|biological_process
4930481A15Rik	4.31466	4.52635	4.10298	0.902222	-0.148445	0.907264	0.968631	Down	0.0242941	0.0345018	0.114628	0.0140741	0.0856663	0.0705813	74931	RIKEN cDNA 4930481A15 gene	non_coding			GO:0003674,GO:0005575,GO:0008150	molecular_function|cellular_component|biological_process
4930481B07Rik	42.377	37.5925	47.1616	1.25478	0.327431	0.429186	0.724425	Up	0.269242	0.14468	0.183118	0.130683	0.145404	0.14376	108168883	RIKEN cDNA 4930481B07 gene	non_coding			GO:0003674,GO:0005575,GO:0008150	molecular_function|cellular_component|biological_process
4930486L24Rik	2576.52	2130.24	3022.8	1.41893	0.504805	0.0639462	0.263423	Up	68.8393	52.0463	80.2531	25.6989	40.412	59.4095	214639	RIKEN cDNA 4930486L24 gene	protein_coding			GO:0004197,GO:0005576,GO:0005615,GO:0005764,GO:0006508,GO:0006955,GO:0008234,GO:0008656,GO:0010952,GO:0030054,GO:0051603,GO:2001235	cysteine-type endopeptidase activity|extracellular region|extracellular space|lysosome|proteolysis|immune response|cysteine-type peptidase activity|cysteine-type endopeptidase activator activity involved in apoptotic process|positive regulation of peptidase activity|cell junction|proteolysis involved in protein catabolic process|positive regulation of apoptotic signaling pathway
4930500F10Rik	15.3075	11.751	18.8639	1.60258	0.680395	0.317882	0.635976	Up	0.246547	0.155617	0.369301	0.0952197	0.137997	0.191011	102636338	RIKEN cDNA 4930500F10 gene	non_coding			GO:0003674,GO:0005575,GO:0008150	molecular_function|cellular_component|biological_process
4930500G05Rik	16.5875	26.5566	6.6184	0.249262	-2.00427	0.00530109	0.0477864	Down	0.212084	0.120478	0.155662	0.589748	0.872496	0.271112	75037	RIKEN cDNA 4930500G05 gene	non_coding			GO:0003674,GO:0005575,GO:0008150	molecular_function|cellular_component|biological_process
4930503L19Rik	264.444	223.134	305.754	1.36983	0.453998	0.0973914	0.340636	Up	2.77933	1.57486	3.12025	1.44748	1.86441	1.50076	269033	RIKEN cDNA 4930503L19 gene	protein_coding			GO:0005576,GO:0008285	extracellular region|negative regulation of cell population proliferation
4930506C21Rik	2.77485	2.64113	2.90856	1.09769	0.134468	0.93237	0.977689	Up	0.0539454	0.0766117	0.141408	0	0.0634077	0.156727	75060	RIKEN cDNA 4930506C21 gene	non_coding			GO:0003674,GO:0005575,GO:0008150	molecular_function|cellular_component|biological_process
4930507D05Rik	6.57857	6.85179	6.30534	0.92178	-0.117506	0.900791	0.965845	Down	0.0958919	0.102137	0.0628406	0.111104	0.098623	0.041789	74706	RIKEN cDNA 4930507D05 gene	non_coding			GO:0003674,GO:0005575,GO:0008150	molecular_function|cellular_component|biological_process
4930509E16Rik	2.99558	2.27958	3.71157	1.63124	0.705973	0.598456	0.827718	Up	0.0883236	0.14634	0.0463047	0.0511676	0.0519081	0.0513211	75115	RIKEN cDNA 4930509E16 gene	non_coding			GO:0003674,GO:0005575,GO:0008150	molecular_function|cellular_component|biological_process
4930509G22Rik	13.2714	15.2558	11.2871	0.739739	-0.434912	0.55731	0.808178	Down	0.148399	0.0903221	0.177828	0.208785	0.0747552	0.209411	105246071	RIKEN cDNA 4930509G22 gene	non_coding			GO:0003674,GO:0005575,GO:0008150	molecular_function|cellular_component|biological_process
4930511M06Rik	2.95868	4.15638	1.76098	0.42119	-1.24746	0.422483	0.721093	Down	0	0.0145098	0.0321381	0.0177566	0.0540407	0.0267148	75084	RIKEN cDNA 4930511M06 gene	non_coding			GO:0003674,GO:0005575,GO:0008150	molecular_function|cellular_component|biological_process
4930512H18Rik	16.0451	15.5618	16.5284	1.06115	0.085627	0.914672	0.970905	Up	0.026038	0.172566	0.170634	0.0905059	0.107118	0.113472	75111	RIKEN cDNA 4930512H18 gene	non_coding			GO:0003674,GO:0005575,GO:0008150	molecular_function|cellular_component|biological_process
4930513D17Rik	2.05962	2.64198	1.47726	0.555111	-0.849153	0.641527	0.850778	Down	0.0218788	0	0.0917619	0.0253497	0.102866	0.0508514	75095	RIKEN cDNA 4930513D17 gene	non_coding			GO:0003674,GO:0005575,GO:0008150	molecular_function|cellular_component|biological_process
4930513N10Rik	30.6478	27.8806	33.415	1.19971	0.262681	0.630198	0.845227	Up	0.272084	0.444145	0.363987	0.402213	0.154391	0.239871	319960	RIKEN cDNA 4930513N10 gene	non_coding			GO:0003674,GO:0005575,GO:0008150	molecular_function|cellular_component|biological_process
4930515G01Rik	2.01575	1.12381	2.90769	2.57388	1.36395	0.506593	0.778028	Up	0.0840875	0.0199031	0.11021	0	0.0741278	0	67642	RIKEN cDNA 4930515G01 gene	non_coding			GO:0003674,GO:0005575,GO:0008150	molecular_function|cellular_component|biological_process
4930519F16Rik	2.61662	0.386802	4.84644	11.8763	3.57001	0.135498	0.409139	Up	0	0.157057	0.0231913	0.0128134	0	0	75106	RIKEN cDNA 4930519F16 gene	protein_coding
4930520E11Rik	29.046	26.9652	31.1268	1.15267	0.204983	0.700164	0.880032	Up	0.155988	0.142216	0.327114	0.160652	0.183349	0.134278	102634716	RIKEN cDNA 4930520E11 gene	non_coding			GO:0003674,GO:0005575,GO:0008150	molecular_function|cellular_component|biological_process
4930520O04Rik	2.55257	3.40632	1.69882	0.500481	-0.998613	0.555745	0.806901	Down	0.0419097	0.0793587	0	0.0242791	0.049261	0.146112	75116	RIKEN cDNA 4930520O04 gene	non_coding			GO:0003674,GO:0005575,GO:0008150	molecular_function|cellular_component|biological_process
4930521O11Rik	7.16279	4.59282	9.73276	2.12434	1.08701	0.346365	0.658842	Up	0.218632	0.192212	0.114621	0.144752	0.0734234	0	74715	RIKEN cDNA 4930521O11 gene	non_coding			GO:0003674,GO:0005575,GO:0008150	molecular_function|cellular_component|biological_process
4930522L14Rik	271.309	376.176	166.441	0.442317	-1.17685	7.78983e-06	0.000251276	Down	1.28728	1.37715	1.52514	1.83698	3.15439	3.43143	100041734	RIKEN cDNA 4930522L14 gene	protein_coding			GO:0000978,GO:0000981,GO:0005634,GO:0006357	RNA polymerase II cis-regulatory region sequence-specific DNA binding|DNA-binding transcription factor activity, RNA polymerase II-specific|nucleus|regulation of transcription by RNA polymerase II					zf-C2H2
4930522P08Rik	4.59786	3.76958	5.42615	1.43853	0.5246	0.665256	0.864451	Up	0.390183	0.81272	0.24547	0.0904164	0.550349	0.272063	78183	RIKEN cDNA 4930522P08 gene	non_coding			GO:0003674,GO:0005575,GO:0008150	molecular_function|cellular_component|biological_process
4930523C07Rik	483.615	603.894	363.336	0.601616	-0.733085	2.84431e-05	0.000738747	Down	3.05022	2.46828	2.69253	3.31511	4.4356	4.34756	67647	RIKEN cDNA 4930523C07 gene	protein_coding			GO:0003674,GO:0005575,GO:0008150	molecular_function|cellular_component|biological_process
4930524J08Rik	10.1855	6.83033	13.5406	1.98173	0.986762	0.228996	0.543616	Up	0.324671	0.922177	0.638298	0.23511	0.286215	0.330142	75129	RIKEN cDNA 4930524J08 gene	protein_coding			GO:0003674,GO:0005575,GO:0008150	molecular_function|cellular_component|biological_process
4930525G20Rik	15.4521	20.5124	10.3917	0.506286	-0.981976	0.104661	0.354204	Down	0.114456	0.0833572	0.120009	0.183618	0.196623	0.173937	320163	RIKEN cDNA 4930525G20 gene	non_coding			GO:0003674,GO:0005575,GO:0008150	molecular_function|cellular_component|biological_process
4930526I15Rik	186.442	194.926	177.958	0.912764	-0.131686	0.565253	0.81123	Down	3.4462	2.87126	3.13164	2.378	3.29456	3.5065	75135	RIKEN cDNA 4930526I15 gene	non_coding			GO:0003674,GO:0005575,GO:0008150	molecular_function|cellular_component|biological_process
4930528A17Rik	8.66283	7.24616	10.0795	1.39275	0.477933	0.562543	0.810535	Up	0.111539	0.176005	0.14294	0.129233	0.0728352	0.0720116	67735	RIKEN cDNA 4930528A17 gene	non_coding			GO:0003674,GO:0005575,GO:0008150	molecular_function|cellular_component|biological_process
4930533K18Rik	2.40089	1.89278	2.90899	1.5321	0.615515	0.684524	0.872197	Up	0.0181744	0.0688287	0.0952815	0.0210576	0.0427246	0.0422415	75189	RIKEN cDNA 4930533K18 gene	non_coding			GO:0003674,GO:0005575,GO:0008150	molecular_function|cellular_component|biological_process
4930539J05Rik	3.79161	4.94218	2.64103	0.531807	-0.911026	0.475613	0.758573	Down	0.0525967	0.0995951	0.330894	0.304703	0.309113	0.18337	319587	RIKEN cDNA 4930539J05 gene	non_coding			GO:0003674,GO:0005575,GO:0008150	molecular_function|cellular_component|biological_process
4930539M17Rik	5.12566	1.889	8.36232	4.41508	2.14244	0.0757802	0.29375	Up	0.434171	0.146809	0.325171	0.035932	0.109356	0.0360397	75149	RIKEN cDNA 4930539M17 gene	non_coding			GO:0003674,GO:0005575,GO:0008150	molecular_function|cellular_component|biological_process
4930544F09Rik	4.47603	2.63357	6.31849	2.39331	1.25901	0.356562	0.667116	Up	0.0211323	0.00461716	0.0102267	0	0.00764279	0.00566727	75198	RIKEN cDNA 4930544F09 gene	non_coding			GO:0003674,GO:0005575,GO:0008150	molecular_function|cellular_component|biological_process
4930546K05Rik	2.17941	3.79312	0.565696	0.150311	-2.73398	0.172159	0.469156	Down	0.014862	0	0	0.0172197	0.0174689	0.0518141	78194	RIKEN cDNA 4930546K05 gene	non_coding			GO:0003674,GO:0005575,GO:0008150	molecular_function|cellular_component|biological_process
4930550C14Rik	17.1516	21.6935	12.6098	0.582283	-0.780209	0.193381	0.499409	Down	0.0894164	0.0752513	0.0520863	0.13238	0.105101	0.0923663	75311	RIKEN cDNA 4930550C14 gene	protein_coding			GO:0005515,GO:0005737,GO:0005739,GO:0005741,GO:0005829,GO:0016020,GO:0090258,GO:1903215	protein binding|cytoplasm|mitochondrion|mitochondrial outer membrane|cytosol|membrane|negative regulation of mitochondrial fission|negative regulation of protein targeting to mitochondrion
4930552P12Rik	4.63489	7.22639	2.04339	0.281473	-1.82893	0.129339	0.399955	Down	0.0210724	0.00997548	0.0441898	0.0976613	0.0990746	0.0367328	77594	RIKEN cDNA 4930552P12 gene	non_coding			GO:0003674,GO:0005575,GO:0008150	molecular_function|cellular_component|biological_process
4930553J12Rik	5.99364	11.9873	0	0.013261	-6.23666	0.019591	0.121483	Down	0	0	0	0	1.03794	0	75351	RIKEN cDNA 4930553J12 gene	non_coding			GO:0003674,GO:0005575,GO:0008150	molecular_function|cellular_component|biological_process
4930555A03Rik	2.6604	3.00902	2.31179	0.766549	-0.38355	0.825457	0.934167	Down	0.0124874	0.0472911	0.0392799	0.0144683	0.102744	0	100504653	RIKEN cDNA 4930555A03 gene	non_coding			GO:0003674,GO:0005575,GO:0008150	molecular_function|cellular_component|biological_process
4930556A17Rik	9.34254	17.8203	0.864734	0.0484983	-4.36592	0.000687171	0.00980561	Down	0.0224389	0.0212447	0.0235277	0.18199	0.158249	0.886602	102640520	RIKEN cDNA 4930556A17 gene	non_coding			GO:0003674,GO:0005575,GO:0008150	molecular_function|cellular_component|biological_process
4930556M19Rik	205.983	215.653	196.313	0.910346	-0.135513	0.487248	0.765658	Down	1.42676	1.35083	1.33118	1.27485	1.50648	1.22247	75259	RIKEN cDNA 4930556M19 gene	non_coding			GO:0003674,GO:0005575,GO:0008150	molecular_function|cellular_component|biological_process
4930558J18Rik	2.82927	0.752989	4.90555	6.47949	2.69588	0.100108	0.346004	Up	0.0640798	0.0728035	0.0806271	0	0.015064	0.0148936	75323	RIKEN cDNA 4930558J18 gene	non_coding			GO:0003674,GO:0005575,GO:0008150	molecular_function|cellular_component|biological_process
4930562F17Rik	13.8541	14.8295	12.8786	0.869898	-0.201082	0.761426	0.908281	Down	0.250312	0.296238	0.147632	0.253768	0.220663	0.236349	75256	RIKEN cDNA 4930562F17 gene	non_coding			GO:0003674,GO:0005575,GO:0008150	molecular_function|cellular_component|biological_process
4930563E18Rik	2.93739	1.89741	3.97736	2.09937	1.06996	0.511215	0.780862	Up	0.152405	0.0641308	0.0177556	0.0392406	0.0597127	0	75370	RIKEN cDNA 4930563E18 gene	non_coding			GO:0003674,GO:0005575,GO:0008150	molecular_function|cellular_component|biological_process
4930563E22Rik	18.2677	16.2858	20.2496	1.24148	0.312064	0.59967	0.828315	Up	0.166697	0.157825	0.233047	0.0827748	0.149285	0.166046	75304	RIKEN cDNA 4930563E22 gene	protein_coding			GO:0003674,GO:0005575,GO:0008150	molecular_function|cellular_component|biological_process
4930577N17Rik	53.1449	46.5745	59.7152	1.28102	0.357298	0.362661	0.673615	Up	1.00595	1.08847	1.20544	0.555015	1.08856	0.649459	67746	RIKEN cDNA 4930577N17 gene	non_coding			GO:0003674,GO:0005575,GO:0008150	molecular_function|cellular_component|biological_process
4930578G10Rik	1.57838	1.14357	2.01318	1.76296	0.817998	0.67366	0.86842	Up	0.0414801	0.15709	0.0869857	0.0480604	0	0.0964092	102638670	RIKEN cDNA 4930578G10 gene	non_coding			GO:0003674,GO:0005575,GO:0008150	molecular_function|cellular_component|biological_process
4930578L24Rik	10.6456	7.58331	13.7078	1.80343	0.850743	0.298978	0.618229	Up	0.0881957	0.0759109	0.218578	0.0464487	0.0659692	0.0745407	105246496	RIKEN cDNA 4930578L24 gene	non_coding			GO:0003674,GO:0005575,GO:0008150	molecular_function|cellular_component|biological_process
4930578M01Rik	1.37753	0.756772	1.99829	2.64001	1.40054	0.610356	0.835013	Up	0	0.164711	0.0304018	0	0	0.0673908	75951	RIKEN cDNA 4930578M01 gene	non_coding			GO:0003674,GO:0005575,GO:0008150	molecular_function|cellular_component|biological_process
4930579G18Rik	9.81134	6.42924	13.1934	2.05109	1.03639	0.339653	0.65342	Up	0.252003	0.357888	0.207611	0.104279	0.253891	0	75913	RIKEN cDNA 4930579G18 gene	non_coding			GO:0003674,GO:0005575,GO:0008150	molecular_function|cellular_component|biological_process
4930579G24Rik	86.4706	74.8305	98.1107	1.31078	0.390425	0.204213	0.512122	Up	1.34829	1.50404	1.67966	0.912563	0.863005	1.28763	75939	RIKEN cDNA 4930579G24 gene	protein_coding			GO:0003674,GO:0005575,GO:0005737,GO:0005829,GO:0008150	molecular_function|cellular_component|cytoplasm|cytosol|biological_process
4930579K19Rik	14.305	12.9068	15.7031	1.21474	0.280645	0.701721	0.880935	Up	0.410912	0.194522	0.646277	0.238049	0.241494	0.424468	75881	RIKEN cDNA 4930579K19 gene	non_coding			GO:0003674,GO:0005575,GO:0008150	molecular_function|cellular_component|biological_process
4930581F22Rik	71.4059	64.527	78.2848	1.21219	0.277614	0.467481	0.752393	Up	1.00726	0.60122	1.37758	0.63427	0.7464	0.788853	78934	RIKEN cDNA 4930581F22 gene	non_coding			GO:0003674,GO:0005575,GO:0008150	molecular_function|cellular_component|biological_process
4930590J08Rik	11.7925	9.90328	13.6817	1.38443	0.469295	0.566423	0.811653	Up	0.0600115	0.075757	0.0209745	0.0386287	0.0195939	0.042619	381798	RIKEN cDNA 4930590J08 gene	protein_coding			GO:0003674,GO:0005737,GO:0008150,GO:0016020	molecular_function|cytoplasm|biological_process|membrane
4930590L20Rik	2.83976	1.51439	4.16513	2.73976	1.45405	0.438593	0.73216	Up	0	0.0451884	0.650577	0.0553	0.112201	0.0554659	75910	RIKEN cDNA 4930590L20 gene	non_coding			GO:0003674,GO:0005575,GO:0008150	molecular_function|cellular_component|biological_process
4930592C13Rik	2.07612	1.88815	2.26409	1.20053	0.263671	0.898379	0.964612	Up	0.198929	0.113005	0	0	0.0467644	0.184942	381498	RIKEN cDNA 4930592C13 gene	non_coding			GO:0003674,GO:0005575,GO:0008150	molecular_function|cellular_component|biological_process
4930594M22Rik	12.5807	9.51439	15.647	1.64413	0.717328	0.397483	0.702225	Up	0.0434444	0.171385	0.174618	0.0922835	0.0851081	0.0336583	105245866	RIKEN cDNA 4930594M22 gene	non_coding			GO:0003674,GO:0005575,GO:0008150	molecular_function|cellular_component|biological_process
4930597A21Rik	2.92905	5.29153	0.566564	0.107911	-3.21208	0.0779843	0.298069	Down	0	0.0713432	0	0.0873075	0.265713	0.262708	75389	RIKEN cDNA 4930597A21 gene	non_coding			GO:0003674,GO:0005575,GO:0008150	molecular_function|cellular_component|biological_process
4930597O21Rik	2.41956	3.42315	1.41598	0.415773	-1.26613	0.449179	0.73957	Down	0.0197881	0.0749399	0	0.0687818	0.0465181	0.0919841	75373	RIKEN cDNA 4930597O21 gene	non_coding			GO:0003674,GO:0005575,GO:0008150	molecular_function|cellular_component|biological_process
4930599N23Rik	9.48838	9.95377	9.02298	0.906279	-0.141972	0.876323	0.956202	Down	0.268961	0.169764	0.501354	0.554006	0.175632	0.173646	75379	RIKEN cDNA 4930599N23 gene	non_coding			GO:0003674,GO:0005575,GO:0008150	molecular_function|cellular_component|biological_process
4931406C07Rik	2450.49	2026.91	2874.07	1.41798	0.50384	3.85312e-05	0.000946312	Up	29.5888	27.02	25.6587	16.4469	18.9102	16.0927	70984	RIKEN cDNA 4931406C07 gene	protein_coding			GO:0005634,GO:0005654,GO:0008270,GO:0016604,GO:0016787,GO:0016788,GO:0046872	nucleus|nucleoplasm|zinc ion binding|nuclear body|hydrolase activity|hydrolase activity, acting on ester bonds|metal ion binding
4931408C20Rik	48.4374	3.05782	93.8171	30.8054	4.94511	9.75871e-12	1.47615e-09	Up	0.376472	0.845099	0.738545	0.035177	0.0214116	0	210940	RIKEN cDNA 4931408C20 gene	protein_coding			GO:0003674,GO:0005575,GO:0008150	molecular_function|cellular_component|biological_process
4931408D14Rik	19.8227	17.1292	22.5162	1.31373	0.39367	0.708479	0.884308	Up	0.0243278	0.214976	0.391127	0.122144	0.0190634	0.282717	77059	RIKEN cDNA 4931408D14 gene	non_coding			GO:0003674,GO:0005575,GO:0008150	molecular_function|cellular_component|biological_process
4931414P19Rik	487.06	442.752	531.369	1.20052	0.263658	0.123046	0.388436	Up	2.8838	2.69733	2.42995	2.17537	1.78187	1.94902	74359	RIKEN cDNA 4931414P19 gene	protein_coding			GO:0005575,GO:0005576,GO:0010628,GO:0030154	cellular_component|extracellular region|positive regulation of gene expression|cell differentiation
4931415C17Rik	11.7749	16.6638	6.88592	0.413449	-1.27422	0.122002	0.386486	Down	0.128513	0.0774285	0.0734992	0.175973	0.343306	0.0814617	70966	RIKEN cDNA 4931415C17 gene	non_coding			GO:0003674,GO:0005575,GO:0008150	molecular_function|cellular_component|biological_process
4931440J10Rik	2.24118	0.756772	3.72559	4.91703	2.29779	0.236162	0.551758	Up	0.206609	0.0838343	0.0928433	0	0	0.0686009	71000	RIKEN cDNA 4931440J10 gene	non_coding			GO:0003674,GO:0005575,GO:0008150	molecular_function|cellular_component|biological_process
4931440P22Rik	7.0111	7.18138	6.84083	0.953385	-0.0688695	0.945238	0.982428	Down	0.127182	0.160551	0.044451	0.0654924	0.18271	0.0656888	71004	RIKEN cDNA 4931440P22 gene	non_coding			GO:0003674,GO:0005575,GO:0008150	molecular_function|cellular_component|biological_process
4932415M13Rik	6.35494	0.765188	11.9447	15.6671	3.96967	0.00869141	0.0689841	Up	0.137373	0.0243867	0.198054	0.00994787	0	0.0099777	211496	RIKEN cDNA 4932415M13 gene	non_coding			GO:0003674,GO:0005575,GO:0008150	molecular_function|cellular_component|biological_process
4932438H23Rik	13.9396	25.4904	2.38883	0.0926391	-3.43224	0.00309719	0.0324287	Down	0	0	0.0330233	0.114036	0.0879213	0.105227	74387	RIKEN cDNA 4932438H23 gene	protein_coding			GO:0003674,GO:0005575,GO:0008150	molecular_function|cellular_component|biological_process
4933402J15Rik	1.96086	1.92559	1.99613	1.0416	0.058807	0.975353	0.992873	Up	0.0792119	0.0149993	0.0166111	0.0734225	0	0.0184107	74425	RIKEN cDNA 4933402J15 gene	non_coding			GO:0003674,GO:0005575,GO:0008150	molecular_function|cellular_component|biological_process
4933404O12Rik	110.947	82.1823	139.712	1.70097	0.766357	0.00960927	0.0738523	Up	0.940647	1.29825	0.951562	0.621687	0.474959	0.569664	66752	RIKEN cDNA 4933404O12 gene	non_coding			GO:0003674,GO:0005575,GO:0008150	molecular_function|cellular_component|biological_process
4933405D12Rik	11.0013	10.2274	11.7753	1.15117	0.2031	0.807943	0.928717	Up	0.616368	0.389044	0.394947	0.1587	0.241494	0.676496	74057	RIKEN cDNA 4933405D12 gene	non_coding			GO:0003674,GO:0005575,GO:0008150	molecular_function|cellular_component|biological_process
4933406C10Rik	15.6705	17.8507	13.4903	0.756374	-0.402828	0.504806	0.777017	Down	0.289878	0.259204	0.202629	0.298546	0.340724	0.243296	74076	RIKEN cDNA 4933406C10 gene	non_coding			GO:0003674,GO:0005575,GO:0008150	molecular_function|cellular_component|biological_process
4933406J09Rik	1.78968	3.0128	0.566564	0.189028	-2.40333	0.279413	0.598095	Down	0	0.0330881	0	0.0202461	0.123234	0.0203068	102639979	RIKEN cDNA 4933406J09 gene	non_coding			GO:0003674,GO:0005575,GO:0008150	molecular_function|cellular_component|biological_process
4933407K13Rik	27.5372	24.2917	30.7828	1.26723	0.34168	0.488766	0.766518	Up	0.334961	0.236007	0.261369	0.153435	0.164811	0.262527	74396	RIKEN cDNA 4933407K13 gene	non_coding			GO:0003674,GO:0005575,GO:0008150	molecular_function|cellular_component|biological_process
4933407O12Rik	2.79975	3.0355	2.56399	0.845965	-0.24133	0.890302	0.962124	Down	0.0458559	0.130246	0.0240405	0.0265652	0	0.186514	102635879	RIKEN cDNA 4933407O12 gene	protein_coding			GO:0003674,GO:0005575,GO:0008150	molecular_function|cellular_component|biological_process
4933411K16Rik	10.933	9.12882	12.7372	1.39476	0.480016	0.58491	0.820724	Up	0.131398	0.337671	0.354276	0.152243	0.0661912	0.305399	66765	RIKEN cDNA 4933411K16 gene	protein_coding			GO:0003674,GO:0005575,GO:0008150	molecular_function|cellular_component|biological_process
4933412E12Rik	79.95	88.9288	70.9712	0.797937	-0.325654	0.330993	0.647331	Down	1.18983	1.18428	1.37552	1.27254	1.03994	1.84363	71086	RIKEN cDNA 4933412E12 gene	non_coding			GO:0003674,GO:0005575,GO:0008150	molecular_function|cellular_component|biological_process
4933412O06Rik	7.59835	11.722	3.47469	0.295694	-1.75782	0.0704553	0.280907	Down	0.0702539	0.0886867	0.122771	0.108532	0.302782	0.435429	71071	RIKEN cDNA 4933412O06 gene	non_coding			GO:0003674,GO:0005575,GO:0008150	molecular_function|cellular_component|biological_process
4933413J09Rik	27.6389	41.7442	13.5337	0.324195	-1.62507	0.00320856	0.0331087	Down	0.186348	0.0588102	0.122119	0.28788	0.355931	0.351906	71106	RIKEN cDNA 4933413J09 gene	non_coding			GO:0003674,GO:0005575,GO:0008150	molecular_function|cellular_component|biological_process
4933416I08Rik	2.24149	3.03635	1.44662	0.475613	-1.07214	0.47684	0.759194	Down	0.0178779	0.0338529	0.0374908	0.041428	0.0420276	0.0831046	71159	RIKEN cDNA 4933416I08 gene	protein_coding			GO:0003674,GO:0005575,GO:0008150	molecular_function|cellular_component|biological_process
4933416M07Rik	1.34539	2.69078	0	0.059145	-4.0796	0.18513	0.487981	Down	0	0	0	0.100231	0	0.0402128	71082	RIKEN cDNA 4933416M07 gene	non_coding			GO:0003674,GO:0005575,GO:0008150	molecular_function|cellular_component|biological_process
4933417E11Rik	8.37162	8.70712	8.03611	0.922888	-0.115772	0.891334	0.962271	Down	0.168425	0.318923	0.176598	0.139388	0.282811	0.22369	71134	RIKEN cDNA 4933417E11 gene	non_coding			GO:0003674,GO:0005575,GO:0008150	molecular_function|cellular_component|biological_process
4933417O13Rik	31.0842	51.6003	10.5682	0.205255	-2.28451	0.0002376	0.00420294	Down	0.206802	0.310011	0.108419	0.618991	0.648205	1.462	71153	RIKEN cDNA 4933417O13 gene	non_coding			GO:0003674,GO:0005575,GO:0008150	molecular_function|cellular_component|biological_process
4933421O10Rik	104.647	110.065	99.2285	0.901158	-0.150148	0.566198	0.811653	Down	0.689905	0.801935	0.852302	0.672721	0.810919	0.825563	100504166	RIKEN cDNA 4933421O10 gene	non_coding			GO:0003674,GO:0005575,GO:0008150	molecular_function|cellular_component|biological_process
4933422A05Rik	3.62697	3.38741	3.86653	1.13629	0.184335	0.917829	0.972475	Up	0	0.0183619	0.244022	0.0224707	0.159571	0.0225381	71133	RIKEN cDNA 4933422A05 gene	non_coding			GO:0003674,GO:0005575,GO:0008150	molecular_function|cellular_component|biological_process
4933424G05Rik	15.0955	24.7517	5.4393	0.220303	-2.18244	0.00355748	0.0356587	Down	0.150707	0.0713432	0.0632079	0.419076	0.21257	0.507902	74456	RIKEN cDNA 4933424G05 gene	non_coding			GO:0003674,GO:0005575,GO:0008150	molecular_function|cellular_component|biological_process
4933424G06Rik	2.66712	1.89193	3.44231	1.81867	0.862884	0.648798	0.854762	Up	0.103304	0.0279448	0.0464217	0	0	0.0857511	71166	RIKEN cDNA 4933424G06 gene	protein_coding			GO:0003674,GO:0005575,GO:0008150	molecular_function|cellular_component|biological_process
4933425B07Rik	2.53042	4.18078	0.880056	0.208858	-2.25941	0.166725	0.45968	Down	0.0136544	0	0.0286339	0.0632821	0.0641979	0.0476039	74458	RIKEN cDNA 4933425B07 gene	non_coding			GO:0003674,GO:0005575,GO:0008150	molecular_function|cellular_component|biological_process
4933426B08Rik	13.5723	20.4948	6.64991	0.323986	-1.62599	0.0163596	0.107637	Down	0.026148	0.0185673	0.0308439	0.0568052	0.0653109	0.0835642	115488815	RIKEN cDNA 4933426B08 gene	non_coding			GO:0003674,GO:0005575,GO:0008150	molecular_function|cellular_component|biological_process
4933427D14Rik	324.706	277.322	372.09	1.34143	0.423774	0.0153348	0.103	Up	2.16491	1.90569	2.47197	1.43334	1.50176	1.37872	74477	RIKEN cDNA 4933427D14 gene	protein_coding			GO:0003674,GO:0005737,GO:0005813,GO:0005829,GO:0005856,GO:0007099,GO:0034451,GO:0060271,GO:0061824,GO:0071539	molecular_function|cytoplasm|centrosome|cytosol|cytoskeleton|centriole replication|centriolar satellite|cilium assembly|cytosolic ciliogenesis|protein localization to centrosome
4933427E11Rik	2.87169	2.3002	3.44318	1.50254	0.587403	0.674673	0.869056	Up	0.108313	0.0820388	0.0681412	0.100396	0.0254623	0.0251744	66769	RIKEN cDNA 4933427E11 gene	non_coding			GO:0003674,GO:0005575,GO:0008150	molecular_function|cellular_component|biological_process
4933430I17Rik	14.6975	15.4979	13.897	0.894968	-0.160092	0.818715	0.931509	Down	0.0449737	0.0319352	0.058945	0.0260541	0.0726858	0.0359319	214106	RIKEN cDNA 4933430I17 gene	protein_coding			GO:0003674,GO:0005575,GO:0008150	molecular_function|cellular_component|biological_process
4933431E20Rik	118.094	102.941	133.247	1.29367	0.371475	0.2253	0.540239	Up	0.734428	0.520356	0.999555	0.48464	0.491653	0.559573	329735	RIKEN cDNA 4933431E20 gene	non_coding			GO:0003674,GO:0005575,GO:0008150	molecular_function|cellular_component|biological_process
4933432I09Rik	0.998714	0	1.99743	9.53612	3.2534	0.246722	0.562876	Up	0.0342427	0.0648406	0.0179521	0	0	0	66779	RIKEN cDNA 4933432I09 gene	non_coding			GO:0003674,GO:0005575,GO:0008150	molecular_function|cellular_component|biological_process
4933433G15Rik	3.82054	4.13661	3.50447	0.84447	-0.243882	0.881736	0.958819	Down	0.114043	0	0.167408	0.026427	0.241285	0.0265063	71274	RIKEN cDNA 4933433G15 gene	non_coding			GO:0003674,GO:0005575,GO:0008150	molecular_function|cellular_component|biological_process
4933433H22Rik	2.75095	0	5.50189	26.2332	4.71332	0.0167611	0.109584	Up	0.1029	0.0556708	0.123307	0	0	0	74473	RIKEN cDNA 4933433H22 gene	non_coding			GO:0003674,GO:0005575,GO:0008150	molecular_function|cellular_component|biological_process
4933434E20Rik	2061	2080.5	2041.5	0.98126	-0.0272922	0.85662	0.948123	Down	34.3506	33.2525	33.2929	27.3439	27.555	36.2194	99650	RIKEN cDNA 4933434E20 gene	protein_coding			GO:0001701,GO:0003674,GO:0005739,GO:0005794,GO:0005829,GO:0006909	in utero embryonic development|molecular_function|mitochondrion|Golgi apparatus|cytosol|phagocytosis
4933439C10Rik	141.471	111.365	171.578	1.53967	0.622621	0.0372988	0.187972	Up	2.1788	1.52304	2.36993	0.813957	1.46	1.21868	74476	RIKEN cDNA 4933439C10 gene	non_coding			GO:0003674,GO:0005575,GO:0008150	molecular_function|cellular_component|biological_process
4933439K11Rik	4.32794	4.58441	4.07146	0.88755	-0.172099	0.887806	0.961324	Down	0.111789	0.0793798	0.205124	0.226665	0.131398	0.0324779	71319	RIKEN cDNA 4933439K11 gene	non_coding			GO:0003674,GO:0005575,GO:0008150	molecular_function|cellular_component|biological_process
4933440N22Rik	28.4697	31.5744	25.3649	0.803463	-0.315697	0.54602	0.801863	Down	0.233709	0.465833	0.374022	0.413302	0.289161	0.486014	74471	RIKEN cDNA 4933440N22 gene	protein_coding			GO:0003674,GO:0005575,GO:0008150	molecular_function|cellular_component|biological_process
5031425E22Rik	203.185	203.671	202.7	0.994629	-0.00776903	0.978903	0.993683	Down	1.26223	0.926441	1.89415	0.992868	1.38155	1.25154	269630	RIKEN cDNA 5031425E22 gene	non_coding			GO:0003674,GO:0005575,GO:0008150	molecular_function|cellular_component|biological_process
5031425F14Rik	2.55047	2.27116	2.82978	1.24845	0.32014	0.849786	0.944748	Up	0.112524	0.0456579	0	0.0186249	0.0377888	0.0560422	319684	RIKEN cDNA 5031425F14 gene	non_coding			GO:0003674,GO:0005575,GO:0008150	molecular_function|cellular_component|biological_process
5031434O11Rik	13.5438	14.3994	12.6882	0.880461	-0.183669	0.786996	0.919805	Down	0.159315	0.16161	0.178977	0.145034	0.254139	0.105796	100039684	RIKEN cDNA 5031434O11 gene	non_coding			GO:0003674,GO:0005575,GO:0008150	molecular_function|cellular_component|biological_process
5031439G07Rik	3385.06	3327	3443.11	1.03496	0.0495706	0.72131	0.889586	Up	15.9984	14.0638	13.2446	13.533	12.3457	11.1509	223739	RIKEN cDNA 5031439G07 gene	protein_coding			GO:0003674,GO:0005575,GO:0008150	molecular_function|cellular_component|biological_process
5033403F01Rik	22.6772	22.4502	22.9043	1.01942	0.027753	0.959628	0.98795	Up	0.499093	0.327137	0.704457	0.511545	0.406134	0.401541	75958	RIKEN cDNA 5033403F01 gene	non_coding			GO:0003674,GO:0005575,GO:0008150	molecular_function|cellular_component|biological_process
5033406O09Rik	99.2199	92.6929	105.747	1.14025	0.189351	0.600953	0.829307	Up	1.44497	1.64168	2.48792	1.25124	1.09057	1.97971	77675	RIKEN cDNA 5033406O09 gene	non_coding
5033417F24Rik	20.9055	15.1414	26.6696	1.75906	0.814809	0.249207	0.565702	Up	0.162336	0.512321	0.567376	0.109718	0.222612	0.2987	75995	RIKEN cDNA 5033417F24 gene	non_coding			GO:0003674,GO:0005575,GO:0008150	molecular_function|cellular_component|biological_process
5033421B08Rik	127.498	151.238	103.757	0.685881	-0.543969	0.155321	0.443232	Down	0.921121	0.621963	1.0332	0.934875	0.688223	1.6845	75990	RIKEN cDNA 5033421B08 gene	non_coding			GO:0003674,GO:0005575,GO:0008150	molecular_function|cellular_component|biological_process
5033430I15Rik	23.4545	29.5382	17.3709	0.587185	-0.768113	0.18633	0.489146	Down	0.728583	0.459872	0.909448	0.602975	1.10106	1.45148	76000	RIKEN cDNA 5033430I15 gene	non_coding			GO:0003674,GO:0005575,GO:0008150	molecular_function|cellular_component|biological_process
5330438D12Rik	15.4273	16.2172	14.6374	0.901981	-0.148832	0.844559	0.942493	Down	0.403408	0.309189	0.261847	0.0890294	0.519327	0.357186	327824	RIKEN cDNA 5330438D12 gene	protein_coding
5330439K02Rik	2.88101	2.27201	3.49001	1.53243	0.615824	0.688452	0.873856	Up	0.199734	0.189105	0.418853	0.15428	0.313026	0	108168267	RIKEN cDNA 5330439K02 gene	non_coding			GO:0003674,GO:0005575,GO:0008150	molecular_function|cellular_component|biological_process
5430400D12Rik	3.13515	3.39412	2.87618	0.846489	-0.240436	0.88009	0.95827	Down	0.0284871	0.00449518	0.0149347	0	0.016742	0.0331053	71339	RIKEN cDNA 5430400D12 gene	non_coding			GO:0003674,GO:0005575,GO:0008150	molecular_function|cellular_component|biological_process
5430401H09Rik	9.04926	5.29995	12.7986	2.41602	1.27263	0.184861	0.487792	Up	0.136026	0.091224	0.0237711	0.0197006	0.0399715	0.0329329	100504461	RIKEN cDNA 5430401H09 gene	non_coding			GO:0003674,GO:0005575,GO:0008150	molecular_function|cellular_component|biological_process
5430402O13Rik	10.7405	14.7987	6.68229	0.450503	-1.15039	0.167054	0.459951	Down	0.104462	0.197806	0.301211	0.272327	0.276268	0.637334	73183	RIKEN cDNA 5430402O13 gene	non_coding			GO:0003674,GO:0005575,GO:0008150	molecular_function|cellular_component|biological_process
5430403G16Rik	170.076	201.117	139.035	0.690844	-0.533569	0.108011	0.360284	Down	1.1321	0.968639	1.95202	1.36028	1.57711	2.24145	77200	RIKEN cDNA 5430403G16 gene	protein_coding			GO:0000978,GO:0000981,GO:0001227,GO:0005634,GO:0005654,GO:0006357	RNA polymerase II cis-regulatory region sequence-specific DNA binding|DNA-binding transcription factor activity, RNA polymerase II-specific|DNA-binding transcription repressor activity, RNA polymerase II-specific|nucleus|nucleoplasm|regulation of transcription by RNA polymerase II					zf-C2H2
5430403N17Rik	14.5708	17.112	12.0297	0.704072	-0.506206	0.445087	0.736693	Down	0.144214	0.185302	0.0972073	0.179027	0.133186	0.227447	330737	RIKEN cDNA 5430403N17 gene	non_coding
5430405H02Rik	72.2883	72.0699	72.5067	1.00527	0.00758555	0.980983	0.994287	Up	1.49878	1.17151	1.71769	1.05	1.41344	1.39745	74487	RIKEN cDNA 5430405H02 gene	non_coding			GO:0003674,GO:0005575,GO:0008150	molecular_function|cellular_component|biological_process
5430416N02Rik	50.6247	53.0029	48.2465	0.909415	-0.13699	0.751	0.903565	Down	2.60463	1.67053	2.77507	1.65494	3.35777	1.85518	100503199	RIKEN cDNA 5430416N02 gene	non_coding			GO:0003674,GO:0005575,GO:0009611	molecular_function|cellular_component|response to wounding
5430421F17Rik	17.9761	21.9734	13.9788	0.634916	-0.655363	0.386665	0.693099	Down	0.0458359	0.206134	0.300375	0.185876	0.323255	0.266333	74489	RIKEN cDNA 5430421F17 gene	non_coding			GO:0003674,GO:0005575,GO:0008150	molecular_function|cellular_component|biological_process
5430437J10Rik	3.0389	3.78177	2.29603	0.607121	-0.719944	0.58406	0.820121	Down	0.0451087	0.0854161	0.0472975	0.0522647	0.132553	0.0786322	71432	RIKEN cDNA 5430437J10 gene	non_coding			GO:0003674,GO:0005575,GO:0008150	molecular_function|cellular_component|biological_process
5530601H04Rik	120.907	116.626	125.188	1.07295	0.101586	0.726295	0.891455	Up	1.02177	0.793932	1.24868	0.767473	0.7206	1.03183	71445	RIKEN cDNA 5530601H04 gene	non_coding			GO:0003674,GO:0005575,GO:0008150	molecular_function|cellular_component|biological_process
5730405A17Rik	13.7812	15.5652	11.9972	0.76987	-0.377313	0.751207	0.90363	Down	0.00593375	0.0842694	0.155542	0.0481255	0.0139491	0.220662	102638389	RIKEN cDNA 5730405A17 gene	non_coding			GO:0003674,GO:0005575,GO:0008150	molecular_function|cellular_component|biological_process
5730405O15Rik	10.7106	12.1311	9.29008	0.764157	-0.38806	0.615019	0.837774	Down	0.326135	0.168425	0.46631	0.309169	0.487889	0.310096	70489	RIKEN cDNA 5730405O15 gene	non_coding			GO:0003674,GO:0005575,GO:0008150	molecular_function|cellular_component|biological_process
5730408K05Rik	14.4471	9.91463	18.9795	1.9164	0.938399	0.234897	0.550324	Up	1.30122	1.81554	1.36436	0.793498	0.160996	1.11423	67531	RIKEN cDNA 5730408K05 gene	non_coding			GO:0003674,GO:0005575,GO:0008150	molecular_function|cellular_component|biological_process
5730409E04Rik	171.244	179.535	162.953	0.907584	-0.139897	0.498552	0.772545	Down	1.72629	1.75613	1.69452	1.54267	1.88878	1.63266	230757	RIKEN cDNA 5730409E04Rik gene	protein_coding			GO:0003674,GO:0005575,GO:0008150	molecular_function|cellular_component|biological_process
5730412P04Rik	2.09795	4.19591	0	0.037907	-4.72139	0.0775318	0.296892	Down	0	0	0	0.088192	0	0.154799	70491	RIKEN cDNA 5730412P04 gene	non_coding			GO:0003674,GO:0005575,GO:0008150	molecular_function|cellular_component|biological_process
5730419F03Rik	5.65639	8.74835	2.56442	0.294194	-1.76516	0.131862	0.403878	Down	0.0106514	0.0705919	0.0111683	0.11107	0.100158	0.074269	70537	RIKEN cDNA 5730419F03 gene	non_coding			GO:0003674,GO:0005575,GO:0008150	molecular_function|cellular_component|biological_process
5730455P16Rik	396.687	423.138	370.237	0.874943	-0.19274	0.20641	0.515283	Down	2.41805	2.35906	2.48194	2.43421	2.64916	2.27041	70591	RIKEN cDNA 5730455P16 gene	protein_coding			GO:0003674,GO:0005794,GO:0005802,GO:0005829,GO:0006886,GO:0031410,GO:0099041	molecular_function|Golgi apparatus|trans-Golgi network|cytosol|intracellular protein transport|cytoplasmic vesicle|vesicle tethering to Golgi
5730460C07Rik	24.6311	18.2051	31.0572	1.70457	0.769406	0.296439	0.615236	Up	0.157733	0.638082	0.736722	0.166141	0.1854	0.449927	70594	RIKEN cDNA 5730460C07 gene	non_coding			GO:0003674,GO:0005575,GO:0008150	molecular_function|cellular_component|biological_process
5730480H06Rik	14.8977	9.90876	19.8867	2.00897	1.00645	0.129516	0.400097	Up	0.424412	0.258316	0.36554	0.210746	0.14253	0.105689	70592	RIKEN cDNA 5730480H06 gene	non_coding			GO:0003674,GO:0005575,GO:0008150	molecular_function|cellular_component|biological_process
5730507C01Rik	90.9095	112.489	69.3297	0.616385	-0.698097	0.737231	0.896665	Down	1.67215	0.00654198	0.01449	1.56114	0.0406086	0.746778	236366	RIKEN cDNA 5730507C01 gene	protein_coding			GO:0000122,GO:0000978,GO:0001227,GO:0001817,GO:0002682,GO:0005654	negative regulation of transcription by RNA polymerase II|RNA polymerase II cis-regulatory region sequence-specific DNA binding|DNA-binding transcription repressor activity, RNA polymerase II-specific|regulation of cytokine production|regulation of immune system process|nucleoplasm					zf-C2H2
5730552O08Rik	18.1415	7.23689	29.0461	4.01429	2.00515	0.0294169	0.161188	Up	0.0333736	0.303335	0.328934	0.0541351	0.0235365	0.069811	115488900	RIKEN cDNA 5730552O08 gene	non_coding			GO:0003674,GO:0005575,GO:0008150	molecular_function|cellular_component|biological_process
5830408C22Rik	2.70206	4.5394	0.864734	0.19029	-2.39373	0.121259	0.384924	Down	0.0749241	0.0709367	0.0785597	0.26043	0.616464	0.174141	74744	RIKEN cDNA 5830408C22 gene	non_coding			GO:0003674,GO:0005575,GO:0008150	molecular_function|cellular_component|biological_process
5830428M24Rik	2.20516	2.66553	1.74479	0.653502	-0.613737	0.726525	0.891503	Down	0.0507201	0.0240104	0.0797718	0.0587663	0	0.147356	76062	RIKEN cDNA 5830428M24 gene	non_coding			GO:0003674,GO:0005575,GO:0008150	molecular_function|cellular_component|biological_process
5830432E09Rik	6.0391	7.23481	4.8434	0.67132	-0.574927	0.596945	0.826535	Down	0.123219	0.133327	0.0369136	0.183556	0.165522	0.0409126	67765	RIKEN cDNA 5830432E09 gene	non_coding			GO:0003674,GO:0005575,GO:0008150	molecular_function|cellular_component|biological_process
5830433I10Rik	9.08648	8.30055	9.8724	1.186	0.246104	0.783141	0.917686	Up	0.0284984	0.0215854	0.0478101	0.00990583	0.0435464	0.0198711	108168347	RIKEN cDNA 5830433I10 gene	non_coding			GO:0003674,GO:0005575,GO:0008150	molecular_function|cellular_component|biological_process
5830444B04Rik	154.974	242.401	67.5474	0.278952	-1.84191	2.44435e-05	0.000658654	Down	0.656638	0.994708	0.249582	2.36801	1.85236	1.86957	641454	RIKEN cDNA 5830444B04 gene	non_coding			GO:0003674,GO:0005575,GO:0008150	molecular_function|cellular_component|biological_process
5830448L01Rik	82.7898	89.681	75.8986	0.846107	-0.241089	0.427355	0.723319	Down	1.05317	1.49569	1.51026	1.43559	1.40175	1.42189	115488304	RIKEN cDNA 5830448L01 gene	non_coding			GO:0003674,GO:0005575,GO:0008150	molecular_function|cellular_component|biological_process
5830454E08Rik	7.68598	7.90155	7.47041	0.944263	-0.0827399	0.939085	0.980292	Down	0.176974	0.469156	0.259786	0.0410099	0.582447	0.246797	76100	RIKEN cDNA 5830454E08 gene	non_coding			GO:0003674,GO:0005575,GO:0008150	molecular_function|cellular_component|biological_process
5930403L14Rik	5.97568	6.44816	5.5032	0.851975	-0.231118	0.808782	0.928717	Down	0.0185298	0.0307013	0.0388578	0.0268366	0.038115	0.0269171	320939	RIKEN cDNA 5930403L14 gene	non_coding			GO:0003674,GO:0005575,GO:0008150	molecular_function|cellular_component|biological_process
5930403N24Rik	4.73036	4.57136	4.88936	1.07089	0.0988065	0.924768	0.975118	Up	0.0594986	0.0402372	0.0445612	0.049241	0.0299721	0.0395109	100040846	RIKEN cDNA 5930403N24 gene	non_coding			GO:0003674,GO:0005575,GO:0008150	molecular_function|cellular_component|biological_process
5930430L01Rik	96.4836	127.718	65.2494	0.510413	-0.970263	0.00553515	0.0493395	Down	0.323286	0.474739	0.691783	0.86381	0.759986	0.958408	319982	RIKEN cDNA 5930430L01 gene	non_coding			GO:0003674,GO:0005575,GO:0008150	molecular_function|cellular_component|biological_process
5930438M14Rik	2.39021	1.93401	2.84641	1.47901	0.564628	0.777131	0.914377	Up	0.0431297	0.051043	0.0113056	0.0624648	0	0	328324	RIKEN cDNA 5930438M14 gene	non_coding
6030407O03Rik	9.66896	15.6132	3.72473	0.239	-2.06492	0.0409466	0.199264	Down	0.131419	0.013825	0.0459319	0.321453	0.274614	0.101816	109198	RIKEN cDNA 6030407O03 gene	non_coding			GO:0003674,GO:0005575,GO:0008150	molecular_function|cellular_component|biological_process
6030426L16Rik	38.4594	33.4651	43.4536	1.2999	0.378404	0.447714	0.738978	Up	0.482595	0.260266	0.179346	0.226492	0.193869	0.205874	628850	RIKEN cDNA 6030426L16 gene	protein_coding			GO:0003674,GO:0005575,GO:0008150	molecular_function|cellular_component|biological_process
6030440G07Rik	25.8176	23.1296	28.5056	1.23205	0.301064	0.604233	0.831706	Up	0.794004	0.797308	0.782075	0.334532	0.395936	0.978646	77878	RIKEN cDNA 6030440G07 gene	non_coding			GO:0003674,GO:0005575,GO:0008150	molecular_function|cellular_component|biological_process
6030443J06Rik	12.0377	11.0128	13.0625	1.18471	0.244539	0.762899	0.908641	Up	0.0973112	0.0460662	0.133919	0.0775147	0.100083	0.0282717	320719	RIKEN cDNA 6030443J06 gene	non_coding			GO:0003674,GO:0005575,GO:0008150	molecular_function|cellular_component|biological_process
6030458C11Rik	880.564	805.37	955.757	1.18673	0.246997	0.0905773	0.327163	Up	3.17601	2.81786	3.46177	2.55903	2.27407	2.20856	77877	RIKEN cDNA 6030458C11 gene	protein_coding			GO:0003674,GO:0005575,GO:0008150	molecular_function|cellular_component|biological_process
6030466F02Rik	10.2403	10.9821	9.49848	0.864436	-0.210169	0.789209	0.920291	Down	0.128374	0.277811	0.192291	0.127491	0.237116	0.255746	234863	RIKEN cDNA 6030466F02 gene	non_coding			GO:0003674,GO:0005575,GO:0008150	molecular_function|cellular_component|biological_process
6030468B19Rik	3.11942	3.0006	3.23824	1.07387	0.10282	0.952714	0.985691	Up	0.0214681	0.0406511	0.180078	0	0.176636	0.0249483	77727	RIKEN cDNA 6030468B19 gene	protein_coding			GO:0002250,GO:0002313,GO:0002376,GO:0004888,GO:0005125,GO:0005576,GO:0005615,GO:0007166,GO:0050776,GO:2000558	adaptive immune response|mature B cell differentiation involved in immune response|immune system process|transmembrane signaling receptor activity|cytokine activity|extracellular region|extracellular space|cell surface receptor signaling pathway|regulation of immune response|positive regulation of immunoglobulin production in mucosal tissue
6230400D17Rik	13.084	13.999	12.1689	0.868161	-0.203965	0.821848	0.932706	Down	0.265884	0.297504	0.456195	0.0840174	0.198878	0.758425	76133	RIKEN cDNA 6230400D17 gene	non_coding			GO:0003674,GO:0005575,GO:0008150	molecular_function|cellular_component|biological_process
6330403K07Rik	480.31	384.364	576.256	1.49893	0.583935	0.0940212	0.333806	Up	5.87517	11.0315	15.8752	4.5	6.67359	8.28111	103712	RIKEN cDNA 6330403K07 gene	protein_coding			GO:0003674,GO:0005575,GO:0008150	molecular_function|cellular_component|biological_process
6330415G19Rik	10.8175	7.97181	13.6632	1.71182	0.77553	0.38598	0.692692	Up	0.0948116	0.179532	0.28581	0.109852	0.153233	0.0275455	320020	RIKEN cDNA 6330415G19 gene	non_coding			GO:0003674,GO:0005575,GO:0008150	molecular_function|cellular_component|biological_process
6330418K02Rik	34.3135	32.1848	36.4423	1.13082	0.177371	0.709842	0.884695	Up	1.41961	1.20966	1.86063	0.699049	1.3349	1.48478	69004	RIKEN cDNA 6330418K02 gene	non_coding			GO:0003674,GO:0005575,GO:0008150	molecular_function|cellular_component|biological_process
6330537M06Rik	4.67634	5.65772	3.69495	0.65403	-0.612571	0.629271	0.844725	Down	0.10709	0.0724223	0.016041	0.0177256	0.125875	0.124451	115486873	RIKEN cDNA 6330537M06 gene	non_coding
6430411K18Rik	9.71526	9.49292	9.93759	1.04497	0.0634629	0.950599	0.985015	Up	0.0199988	0.246148	0.419384	0.185371	0.21156	0.185927	76880	RIKEN cDNA 6430411K18 gen	non_coding			GO:0003674,GO:0005575,GO:0008150	molecular_function|cellular_component|biological_process
6430548M08Rik	680.886	724.349	637.423	0.880101	-0.184259	0.212906	0.524389	Down	3.32593	2.94602	2.82616	3.05133	3.34254	2.76832	234797	RIKEN cDNA 6430548M08 gene	protein_coding			GO:0003674,GO:0005575,GO:0008150	molecular_function|cellular_component|biological_process
6430550D23Rik	12.2908	8.76812	15.8135	1.80586	0.852686	0.262919	0.580334	Up	0.221061	0.0822236	0.13245	0.091475	0.0463994	0.0733995	320095	RIKEN cDNA 6430550D23 gene	protein_coding			GO:0003836,GO:0006486,GO:0010706,GO:0016020,GO:0097503	beta-galactoside (CMP) alpha-2,3-sialyltransferase activity|protein glycosylation|ganglioside biosynthetic process via lactosylceramide|membrane|sialylation
6430571L13Rik	318.98	272.145	365.814	1.34459	0.427166	0.0530201	0.234267	Up	5.21433	4.2246	3.61969	3.11628	3.12504	2.35919	235599	RIKEN cDNA 6430571L13 gene	protein_coding			GO:0003674,GO:0005575,GO:0008150,GO:0016020	molecular_function|cellular_component|biological_process|membrane
6430573P05Rik	21.2237	21.6325	20.8149	0.961256	-0.0570071	0.914675	0.970905	Down	0.211161	0.166603	0.258309	0.183495	0.237859	0.163596	115489693	RIKEN cDNA 6430573P05 gene	non_coding			GO:0003674,GO:0005575,GO:0008150	molecular_function|cellular_component|biological_process
6430584L05Rik	2.30717	3.76579	0.848544	0.226385	-2.14315	0.290269	0.610022	Down	0.0250381	0	0	0.00967005	0.0686699	0.0193981	330324	RIKEN cDNA 6430584L05 gene	non_coding
6430590A07Rik	3.12111	3.39582	2.84641	0.838877	-0.253469	0.87514	0.955852	Down	0.0998988	0.118228	0.0261866	0.0578734	0.205488	0	619719	RIKEN cDNA 6430590A07 gene	non_coding			GO:0003674,GO:0005575,GO:0008150	molecular_function|cellular_component|biological_process
6430710C18Rik	20.4397	16.3569	24.5226	1.49942	0.584402	0.319083	0.636894	Up	0.473038	0.21788	0.402156	0.251821	0.22541	0.163432	76218	RIKEN cDNA 6430710C18 gene	non_coding			GO:0003674,GO:0005575,GO:0008150	molecular_function|cellular_component|biological_process
6530402F18Rik	23.3354	17.4142	29.2565	1.67955	0.748071	0.192017	0.497535	Up	0.300238	0.162434	0.160615	0.0709933	0.144041	0.11393	76220	RIKEN cDNA 6530402F18 gene	non_coding			GO:0003674,GO:0005575,GO:0008150	molecular_function|cellular_component|biological_process
6720468P15Rik	2.76449	2.66638	2.86259	1.07605	0.105742	0.939029	0.980292	Up	0.029466	0.0836934	0.0308958	0.0512106	0.0346345	0.0342428	78073	RIKEN cDNA 6720468P15 gene	non_coding			GO:0003674,GO:0005575,GO:0008150	molecular_function|cellular_component|biological_process
6720489N17Rik	43.8556	50.2122	37.4989	0.74766	-0.419546	0.37019	0.679687	Down	0.229733	0.179348	0.114101	0.252168	0.236868	0.131146	211378	RIKEN cDNA 6720489N17 gene	protein_coding			GO:0003674,GO:0005575,GO:0008150	molecular_function|cellular_component|biological_process
6820408C15Rik	4.94262	2.68321	7.20202	2.69188	1.42861	0.264743	0.582556	Up	0.0350411	0.0608232	0.0489886	0.0338334	0.0137292	0	228778	RIKEN cDNA 6820408C15 gene	protein_coding			GO:0003674,GO:0005575,GO:0008150	molecular_function|cellular_component|biological_process
8030453O22Rik	31.9926	28.1265	35.8586	1.27432	0.34973	0.467112	0.751982	Up	0.683882	0.456183	0.798551	0.504237	0.529803	0.307062	77209	RIKEN cDNA 8030453O22 gene	non_coding			GO:0003674,GO:0005575,GO:0008150	molecular_function|cellular_component|biological_process
8030474K03Rik	42.707	56.0244	29.3896	0.524281	-0.931587	0.208488	0.517964	Down	0.492307	0.0650382	0.624237	0.955099	0.726691	0.279406	382231	RIKEN cDNA 8030474K03 gene	protein_coding			GO:0003674,GO:0005575,GO:0008150	molecular_function|cellular_component|biological_process
8430423G03Rik	2.73262	3.39034	2.0749	0.608764	-0.716044	0.714884	0.887005	Down	0	0.0389652	0.258915	0	0.193498	0.239137	71473	RIKEN cDNA 8430423G03 gene	non_coding			GO:0003674,GO:0005575,GO:0008150	molecular_function|cellular_component|biological_process
8430426J06Rik	13.7463	20.0087	7.484	0.373818	-1.41959	0.0892553	0.324383	Down	0.193212	0.18293	0.180078	0.0994949	0.529908	0.698553	78102	RIKEN cDNA 8430426J06 gene	non_coding			GO:0003674,GO:0005575,GO:0008150	molecular_function|cellular_component|biological_process
8430429K09Rik	87.6607	91.8458	83.4756	0.909308	-0.137159	0.660129	0.861701	Down	1.10976	1.06998	0.757951	0.896533	1.14885	0.828231	71523	RIKEN cDNA 8430429K09 gene	non_coding			GO:0003674,GO:0005575,GO:0008150	molecular_function|cellular_component|biological_process
8430432A02Rik	8.62726	9.83008	7.42445	0.75583	-0.403865	0.674181	0.868756	Down	0.0884871	0.284845	0.0742247	0.0820197	0.228818	0.226231	108167597	RIKEN cDNA 8430432A02 gene	non_coding			GO:0003674,GO:0005575,GO:0008150	molecular_function|cellular_component|biological_process
9030404E10Rik	2.52201	3.03257	2.01145	0.663371	-0.592113	0.715271	0.887179	Down	0.108761	0	0.0456153	0.0504058	0.0767029	0.0758355	71528	RIKEN cDNA 9030404E10 gene	non_coding			GO:0003674,GO:0005575,GO:0008150	molecular_function|cellular_component|biological_process
9030607J07Rik	3.2825	4.56758	1.99743	0.438884	-1.18809	0.362315	0.673404	Down	0.0252021	0.0477217	0.0132125	0.0730003	0.0592454	0.0439315	105244793	RIKEN cDNA 9030607J07 gene	non_coding			GO:0003674,GO:0005575,GO:0008150	molecular_function|cellular_component|biological_process
9030607L20Rik	1.37456	0.752989	1.99613	2.64581	1.40371	0.508838	0.779125	Up	0.0150517	0.00285014	0.00315642	0	0.00353838	0.00349836	105244333	RIKEN cDNA 9030607L20 gene	non_coding			GO:0003674,GO:0005575,GO:0008150	molecular_function|cellular_component|biological_process
9030612E09Rik	1.99032	3.39876	0.581886	0.170225	-2.55449	0.175755	0.473432	Down	0	0.0133363	0.0147694	0.0163205	0.0662266	0.0654777	74530	RIKEN cDNA 9030612E09 gene	non_coding			GO:0003674,GO:0005575,GO:0008150	molecular_function|cellular_component|biological_process
9030616G12Rik	6.8467	9.11493	4.57848	0.502602	-0.99251	0.558427	0.809011	Down	0	0.504181	0.128853	0.189846	0	0.952078	77699	RIKEN cDNA 9030616G12 gene	non_coding			GO:0003674,GO:0005575,GO:0008150	molecular_function|cellular_component|biological_process
9030622O22Rik	62.7537	57.2925	68.215	1.19	0.250957	0.769969	0.912442	Up	0.0162726	0.102711	0.309016	0.0586572	0.0446295	0.214321	100043820	RIKEN cDNA 9030622O22 gene	non_coding			GO:0003674,GO:0005575,GO:0008150	molecular_function|cellular_component|biological_process
9030624G23Rik	73.362	84.4776	62.2463	0.73739	-0.4395	0.480198	0.761611	Down	0.583945	0.16586	0.157443	0.555763	0.14708	0.368389	66808	RIKEN cDNA 9030624G23 gene	protein_coding			GO:0003674,GO:0005575,GO:0008150	molecular_function|cellular_component|biological_process
9130001E16Rik	1.88431	1.12759	2.64103	2.32713	1.21855	0.51828	0.785525	Up	0.00981649	0.0185881	0.0617569	0	0.0230767	0.0114079	71575	RIKEN cDNA 9130001E16 gene	non_coding			GO:0003674,GO:0005575,GO:0008150	molecular_function|cellular_component|biological_process
9130008F23Rik	43.1092	27.7615	58.4569	2.10663	1.07494	0.00484138	0.0448443	Up	0.840476	0.807279	0.8174	0.366942	0.300665	0.368043	71583	RIKEN cDNA 9130008F23 gene	protein_coding			GO:0001835,GO:0003674,GO:0005575	blastocyst hatching|molecular_function|cellular_component
9130015G15Rik	4.47638	5.71408	3.23868	0.564982	-0.823722	0.583707	0.819872	Down	0	0.0297951	0.0879919	0.0607705	0.01233	0.109715	108167511	RIKEN cDNA 9130015G15 gene	non_coding			GO:0003674,GO:0005575,GO:0008150	molecular_function|cellular_component|biological_process
9130019O22Rik	77.0235	75.8418	78.2052	1.03151	0.0447512	0.895404	0.963024	Up	0.549295	0.603529	0.682607	0.683579	0.398547	0.488609	78921	RIKEN cDNA 9130019O22 gene	protein_coding	mmu05168	Herpes simplex virus 1 infection	GO:0000978,GO:0000981,GO:0003712,GO:0005634,GO:0006357,GO:0071385,GO:0140297	RNA polymerase II cis-regulatory region sequence-specific DNA binding|DNA-binding transcription factor activity, RNA polymerase II-specific|transcription coregulator activity|nucleus|regulation of transcription by RNA polymerase II|cellular response to glucocorticoid stimulus|DNA-binding transcription factor binding			R-MMU-212436,R-MMU-73857,R-MMU-74160	Generic Transcription Pathway|RNA Polymerase II Transcription|Gene expression (Transcription)	zf-C2H2
9130019P16Rik	1.79632	1.51818	2.07447	1.35995	0.443551	0.821905	0.932706	Up	0.00586232	0	0.0368807	0.00679231	0.00689061	0.0136254	100042056	RIKEN cDNA 9130019P16 gene	non_coding			GO:0003674,GO:0005575,GO:0008150	molecular_function|cellular_component|biological_process
9130023H24Rik	135.16	115.327	154.994	1.3435	0.425997	0.067094	0.271618	Up	1.32189	1.27936	1.33984	0.748782	1.00995	0.844906	100043133	RIKEN cDNA 9130023H24 gene	protein_coding			GO:0000977,GO:0000981,GO:0003674,GO:0005575,GO:0005634,GO:0006357,GO:0008150	RNA polymerase II transcription regulatory region sequence-specific DNA binding|DNA-binding transcription factor activity, RNA polymerase II-specific|molecular_function|cellular_component|nucleus|regulation of transcription by RNA polymerase II|biological_process					zf-C2H2
9130024F11Rik	4.57885	4.58356	4.57414	1.00079	0.00114305	0.999224	0.99986	Up	0.0705428	0.0200366	0.0221898	0.0490402	0.0165833	0.0327915	329160	RIKEN cDNA 9130024F11 gene	non_coding			GO:0003674,GO:0005575,GO:0008150	molecular_function|cellular_component|biological_process
9130204K15Rik	72.5128	44.8357	100.19	2.23498	1.16026	0.000178974	0.00332736	Up	1.19639	1.38443	1.25444	0.526235	0.546872	0.450573	105242790	RIKEN cDNA 9130204K15 gene	non_coding			GO:0003674,GO:0005575,GO:0008150	molecular_function|cellular_component|biological_process
9130214F15Rik	1.72946	1.13137	2.32754	2.0506	1.03605	0.630818	0.845338	Up	0	0.0445616	0.0493503	0	0.0138305	0.0273483	102632957	RIKEN cDNA 9130214F15 gene	non_coding			GO:0003674,GO:0005575,GO:0008150	molecular_function|cellular_component|biological_process
9130230L23Rik	45.5352	47.7853	43.2851	0.904784	-0.144354	0.775159	0.91409	Down	0.488346	0.873341	1.34648	0.628686	0.80786	1.21911	231253	RIKEN cDNA 9130230L23 gene	non_coding			GO:0003674,GO:0005575,GO:0008150	molecular_function|cellular_component|biological_process
9130401M01Rik	570.845	525.27	616.421	1.17333	0.230615	0.155314	0.443232	Up	14.5254	13.1627	15.2302	9.19463	10.8626	12.3508	75758	RIKEN cDNA 9130401M01 gene	protein_coding			GO:0003674,GO:0005575,GO:0008150	molecular_function|cellular_component|biological_process
9230009I02Rik	20.1377	28.4834	11.7919	0.414188	-1.27164	0.0184654	0.116507	Down	0.343022	0.303116	0.287734	0.662398	0.752622	0.584659	619293	RIKEN cDNA 9230009I02 gene	non_coding			GO:0003674,GO:0005575,GO:0008150	molecular_function|cellular_component|biological_process
9230110K08Rik	3.90204	6.05842	1.74566	0.287232	-1.79971	0.234908	0.550324	Down	0	0.0581295	0.0643762	0.118562	0.240555	0.0237834	102631977	RIKEN cDNA 9230110K08 gene	non_coding			GO:0003674,GO:0005575,GO:0008150	molecular_function|cellular_component|biological_process
9230114K14Rik	37.2719	37.2511	37.2926	1.00178	0.00255993	0.995943	0.998969	Up	0.69533	0.493744	0.416611	0.561068	0.612971	0.245302	414108	RIKEN cDNA 9230114K14 gene	non_coding			GO:0003674,GO:0005575,GO:0008150	molecular_function|cellular_component|biological_process
9230116N13Rik	11.1386	11.4429	10.8344	0.949355	-0.0749806	0.926004	0.975501	Down	0.200655	0.20185	0.0657474	0.203426	0.103185	0.131166	320054	RIKEN cDNA 9230116N13 gene	non_coding			GO:0003674,GO:0005575,GO:0008150	molecular_function|cellular_component|biological_process
9330020H09Rik	22.994	18.9606	27.0273	1.42321	0.509153	0.392929	0.698635	Up	0.130418	0.225164	0.361975	0.115553	0.162311	0.169391	100048895	RIKEN cDNA 9330020H09 gene	non_coding			GO:0003674,GO:0005575,GO:0008150	molecular_function|cellular_component|biological_process
9330102E08Rik	84.515	84.8113	84.2186	0.993437	-0.00949905	0.97876	0.993629	Down	0.861345	0.54367	0.594926	0.704928	0.674954	0.397215	330427	RIKEN cDNA 9330102E08 gene	non_coding			GO:0003674,GO:0005575,GO:0008150	molecular_function|cellular_component|biological_process
9330104G04Rik	36.0029	27.6808	44.325	1.59955	0.67767	0.167804	0.461317	Up	0.352998	0.646143	0.801942	0.272665	0.401086	0.328179	320950	RIKEN cDNA 9330104G04 gene	non_coding			GO:0003674,GO:0005575,GO:0008150	molecular_function|cellular_component|biological_process
9330133O14Rik	86.8853	85.2465	88.5241	1.03791	0.0536829	0.87676	0.956404	Up	0.7924	1.04149	1.01657	0.529261	0.876605	1.04003	100689703	RIKEN cDNA 9330133O14 gene	non_coding			GO:0003674,GO:0005575,GO:0008150	molecular_function|cellular_component|biological_process
9330136K24Rik	6.77109	6.81349	6.72869	0.984199	-0.0229778	0.982339	0.994497	Down	0.0318639	0.0603363	0.155914	0.0369188	0.0749062	0.111089	319870	RIKEN cDNA 9330136K24 gene	non_coding			GO:0003674,GO:0005575,GO:0008150	molecular_function|cellular_component|biological_process
9330151L19Rik	81.9017	85.9319	77.8716	0.905613	-0.143034	0.687628	0.873846	Down	0.939965	0.841043	1.00724	0.646268	1.33552	0.75624	414085	RIKEN cDNA 9330151L19 gene	non_coding			GO:0003674,GO:0005575,GO:0008150	molecular_function|cellular_component|biological_process
9330159F19Rik	2.98417	4.52171	1.44662	0.319148	-1.6477	0.31275	0.630584	Down	0.00410143	0.00776631	0.00860089	0	0.0241042	0.0333643	212448	RIKEN cDNA 9330159F19 gene	protein_coding			GO:0003674,GO:0005575,GO:0008150	molecular_function|cellular_component|biological_process
9330159M07Rik	8.46285	5.33655	11.5891	2.17228	1.11921	0.218915	0.531613	Up	0.0559937	0.150206	0.166347	0.0648765	0.0329077	0.0542259	319673	RIKEN cDNA 9330159M07 gene	non_coding			GO:0003674,GO:0005575,GO:0008150	molecular_function|cellular_component|biological_process
9330162012Rik	19.1109	19.0094	19.2125	1.01183	0.0169735	0.976125	0.992984	Up	0.519518	0.373143	0.300539	0.352858	0.294794	0.395553	493800	cDNA RIKEN 9330162012 gene	non_coding			GO:0003674,GO:0005575,GO:0008150	molecular_function|cellular_component|biological_process
9330188P03Rik	2.55296	0.765188	4.34073	5.68981	2.50838	0.166422	0.459098	Up	0.0243053	0.184095	0.152908	0.0281611	0	0.0282456	380930	RIKEN cDNA 9330188P03 gene	non_coding			GO:0003674,GO:0005575,GO:0008150	molecular_function|cellular_component|biological_process
9330198I05Rik	1.73581	2.62222	0.849412	0.324621	-1.62317	0.53338	0.794776	Down	0.0129103	0.0244465	0	0	0.106224	0	77560	RIKEN cDNA 9330198I05 gene	non_coding			GO:0003674,GO:0005575,GO:0008150	molecular_function|cellular_component|biological_process
9330198N18Rik	6.22383	4.96279	7.48487	1.51065	0.595169	0.546951	0.801863	Up	0.068409	0.101779	0.0819754	0.0792613	0.0459476	0.022714	77516	RIKEN cDNA 9330198N18 gene	non_coding			GO:0003674,GO:0005575,GO:0008150	molecular_function|cellular_component|biological_process
9430015G10Rik	576.119	507.737	644.5	1.26933	0.34407	0.0387875	0.192778	Up	7.76098	6.42127	7.91988	5.46404	5.53149	4.40043	230996	RIKEN cDNA 9430015G10 gene	protein_coding			GO:0003674,GO:0005575,GO:0008150	molecular_function|cellular_component|biological_process
9430037G07Rik	7.56247	9.05648	6.06846	0.668763	-0.580432	0.546718	0.801863	Down	0.0579441	0.0470232	0.0694352	0.0191818	0.107027	0.105816	320692	RIKEN cDNA 9430037G07 gene	non_coding			GO:0003674,GO:0005575,GO:0008150	molecular_function|cellular_component|biological_process
9430038I01Rik	259.514	282.09	236.937	0.839935	-0.25165	0.290368	0.610099	Down	2.34725	2.7278	2.46114	2.22902	2.31537	3.42308	77252	RIKEN cDNA 9430038I01 gene	protein_coding			GO:0003674,GO:0005575,GO:0008150	molecular_function|cellular_component|biological_process
9430060I03Rik	3.38118	3.00439	3.75797	1.24683	0.31826	0.828972	0.935718	Up	0.0467111	0.0737087	0.0816296	0	0.109809	0.0361891	100037260	RIKEN cDNA 9430060I03 gene	non_coding			GO:0003674,GO:0005575,GO:0008150	molecular_function|cellular_component|biological_process
9430062P05Rik	1.74501	0	3.49001	16.634	4.05606	0.0759576	0.293999	Up	0.0259865	0.0246035	0.054495	0	0	0	115487189	RIKEN cDNA 9430062P05 gene	non_coding			GO:0003674,GO:0005575,GO:0008150	molecular_function|cellular_component|biological_process
9430065F17Rik	2.14659	3.44377	0.849412	0.248602	-2.00809	0.263615	0.581035	Down	0.018468	0.0349702	0	0.106988	0.0217074	0.0643856	77857	RIKEN cDNA 9430065F17 gene	non_coding			GO:0003674,GO:0005575,GO:0008150	molecular_function|cellular_component|biological_process
9430078G10Rik	2.36801	3.0372	1.69882	0.561637	-0.832289	0.622435	0.841617	Down	0.014598	0.0276423	0	0.0253708	0.0343173	0.00848229	115489041	RIKEN cDNA 9430078G10 gene	protein_coding
9430078K24Rik	3.98737	5.00402	2.97072	0.592372	-0.755425	0.695207	0.87721	Down	0	0.0171243	0.170681	0.230518	0.0425189	0	77290	RIKEN cDNA 9430078K24 gene	non_coding			GO:0003674,GO:0005575,GO:0008150	molecular_function|cellular_component|biological_process
9430083A17Rik	70.2339	78.4001	62.0677	0.791648	-0.33707	0.306895	0.623885	Down	0.668453	0.507969	0.719334	0.845832	0.671984	0.592836	77428	RIKEN cDNA 9430083A17 gene	non_coding			GO:0003674,GO:0005575,GO:0008150	molecular_function|cellular_component|biological_process
9430085M18Rik	18.7431	14.0765	23.4096	1.66561	0.736048	0.261965	0.579124	Up	0.418516	0.239589	0.132668	0.157877	0.125842	0.135729	77361	RIKEN cDNA 9430085M18 gene	non_coding			GO:0003674,GO:0005575,GO:0008150	molecular_function|cellular_component|biological_process
9430091E24Rik	94.6313	113.773	75.4892	0.663298	-0.592271	0.0417262	0.201389	Down	0.748287	0.941512	0.87751	0.969666	1.40032	1.07555	434350	RIKEN cDNA 9430091E24 gene	non_coding			GO:0003674,GO:0005575,GO:0008150	molecular_function|cellular_component|biological_process
9530018F02Rik	27.5193	28.2035	26.8352	0.951867	-0.071168	0.889556	0.961926	Down	0.241146	0.152209	0.231777	0.263879	0.173217	0.14012	77402	RIKEN cDNA 9530018F02 gene	non_coding			GO:0003674,GO:0005575,GO:0008150	molecular_function|cellular_component|biological_process
9530026P05Rik	12.6067	15.9701	9.24324	0.578488	-0.789642	0.254677	0.57162	Down	0.343597	0.175167	0.332556	0.489975	0.465999	0.337868	330385	RIKEN cDNA 9530026P05 gene	non_coding			GO:0003674,GO:0005575,GO:0008150	molecular_function|cellular_component|biological_process
9530027J09Rik	14.2965	21.9751	6.61796	0.301144	-1.73147	0.0156138	0.104612	Down	0.171783	0.0739275	0.114621	0.289504	0.513964	0.254076	100500713	RIKEN cDNA 9530027J09 gene	non_coding
9530036M11Rik	3.52422	1.49841	5.55003	3.68409	1.88131	0.282846	0.601729	Up	0.00412103	0.0117051	0.0237655	0	0.00968778	0	78616	RIKEN cDNA 9530036M11 gene	non_coding			GO:0003674,GO:0005575,GO:0008150	molecular_function|cellular_component|biological_process
9530036O11Rik	1.85422	1.14357	2.56486	2.24733	1.16821	0.601595	0.829675	Up	0	0.068076	0.00942395	0.0104136	0	0.0208898	654796	RIKEN cDNA 9530036O11Rik	non_coding			GO:0003674,GO:0005575,GO:0008150	molecular_function|cellular_component|biological_process
9530051G07Rik	17.9957	17.8444	18.1471	1.01685	0.0241104	0.968802	0.99045	Up	0.0834112	0.163585	0.124941	0.0897404	0.0910391	0.1454	319781	RIKEN cDNA 9530051G07 gene	non_coding			GO:0003674,GO:0005575,GO:0008150	molecular_function|cellular_component|biological_process
9530052C20Rik	21.0575	18.1878	23.9271	1.31447	0.394478	0.470113	0.754683	Up	0.280222	0.176872	0.249301	0.118064	0.199621	0.157891	320229	RIKEN cDNA 9530052C20 gene	non_coding			GO:0003674,GO:0005575,GO:0008150	molecular_function|cellular_component|biological_process
9530052E02Rik	5.63127	5.28775	5.97479	1.13083	0.177383	0.873141	0.955327	Up	0.303231	0.208795	0.0578081	0.0638791	0.226812	0.160177	619321	RIKEN cDNA 9530052E02 gene	non_coding			GO:0003674,GO:0005575,GO:0008150	molecular_function|cellular_component|biological_process
9530057J20Rik	1.85545	1.14821	2.56269	2.24204	1.16481	0.530211	0.792994	Up	0.050769	0.0288403	0.0106465	0.0235292	0.0119349	0	78672	RIKEN cDNA 9530057J20 gene	protein_coding			GO:0003674,GO:0005575,GO:0008150	molecular_function|cellular_component|biological_process
9530062K07Rik	28.1433	34.5456	21.7409	0.628436	-0.670163	0.189278	0.494026	Down	0.837527	0.539209	1.15918	1.16447	1.45696	0.934371	78739	RIKEN cDNA 9530062K07 gene	non_coding			GO:0003674,GO:0005575,GO:0008150	molecular_function|cellular_component|biological_process
9530068E07Rik	3923.61	4173.94	3673.27	0.880068	-0.184313	0.149037	0.433541	Down	42.6189	47.7084	45.0446	46.9468	42.1381	47.2734	213673	RIKEN cDNA 9530068E07 gene	protein_coding			GO:0003674,GO:0005575,GO:0008150,GO:0016020	molecular_function|cellular_component|biological_process|membrane
9530080O11Rik	2.99229	1.12759	4.85699	4.29179	2.10158	0.195516	0.501655	Up	0.167312	0.0432021	0.0478446	0	0.0357562	0.0176759	319247	RIKEN cDNA 9530080O11 gene	non_coding			GO:0003674,GO:0005575,GO:0008150	molecular_function|cellular_component|biological_process
9530082P21Rik	222.384	249.532	195.236	0.782525	-0.353791	0.196608	0.502748	Down	2.36203	1.40951	1.87492	2.50547	2.268	1.58511	638247	RIKEN cDNA 9530082P21 gene	non_coding			GO:0003674,GO:0005575,GO:0008150	molecular_function|cellular_component|biological_process
9630002D21Rik	1.82132	3.06075	0.581886	0.189578	-2.39914	0.270941	0.589378	Down	0	0.00747936	0.00828311	0.036612	0	0.0367218	319560	RIKEN cDNA 9630002D21 gene	non_coding
9630028B13Rik	2.23548	4.17236	0.298604	0.074213	-3.75218	0.0548705	0.239423	Down	0	0	0.00809585	0.0268382	0.0363021	0.0358916	319562	RIKEN cDNA 9630028B13 gene	non_coding
9830107B12Rik	36.2481	46.7293	25.767	0.552099	-0.857	0.0735977	0.288083	Down	0.276695	0.15136	0.122496	0.306342	0.332457	0.24295	328829	RIKEN cDNA 9830107B12 gene	protein_coding			GO:0009986,GO:0038023	cell surface|signaling receptor activity
9830132P13Rik	2.05683	2.68236	1.4313	0.535316	-0.901537	0.61772	0.838991	Down	0.00627946	0.0178358	0.00658416	0.0291025	0	0.0218923	329753	RIKEN cDNA 9830132P13 gene	non_coding
9930012K11Rik	1051.63	1063.04	1040.23	0.978643	-0.0311448	0.851934	0.946072	Down	19.6377	13.9539	14.2038	14.4834	14.942	13.7574	268759	RIKEN cDNA 9930012K11 gene	protein_coding			GO:0003674,GO:0008150	molecular_function|biological_process
9930014A18Rik	23.2294	20.8874	25.5715	1.22362	0.291156	0.753582	0.905123	Up	0.0102528	0.213557	0.225756	0.0831549	0.0662815	0.178723	320469	RIKEN cDNA 9930014A18 gene	non_coding			GO:0003674,GO:0005575,GO:0008150	molecular_function|cellular_component|biological_process
9930021J03Rik	1435.63	1572.42	1298.84	0.826062	-0.275677	0.0997088	0.34528	Down	2.66808	1.8883	2.07425	2.47614	2.54655	2.07163	240613	RIKEN cDNA 9930021J03 gene	protein_coding			GO:0003674,GO:0005575,GO:0008150	molecular_function|cellular_component|biological_process
9930038B18Rik	13.3312	7.26129	19.4012	2.67795	1.42113	0.117212	0.376749	Up	1.49423	0.929662	0.447637	0.445183	0.0501806	0.446518	319503	RIKEN cDNA 9930038B18 gene	non_coding			GO:0003674,GO:0005575,GO:0008150	molecular_function|cellular_component|biological_process
9930104L06Rik	239.284	206.282	272.286	1.31995	0.400478	0.0302789	0.163798	Up	2.91923	2.31654	2.73356	1.75959	1.82473	1.75507	194268	RIKEN cDNA 9930104L06 gene	protein_coding			GO:0003674,GO:0005634,GO:0005654,GO:0005730,GO:0005737,GO:0005829,GO:0008150,GO:0042254,GO:0042273	molecular_function|nucleus|nucleoplasm|nucleolus|cytoplasm|cytosol|biological_process|ribosome biogenesis|ribosomal large subunit biogenesis
9930111J21Rik1	45.7864	52.2709	39.3018	0.751079	-0.412963	0.3212	0.638989	Down	0.33358	0.225591	0.371181	0.252408	0.456107	0.387658	667214	RIKEN cDNA 9930111J21 gene 1	protein_coding			GO:0003924,GO:0005789,GO:0006952,GO:0035458	GTPase activity|endoplasmic reticulum membrane|defense response|cellular response to interferon-beta
9930111J21Rik2	10.6616	7.22176	14.1015	1.95339	0.965982	0.196004	0.502372	Up	0.229823	0.1347	0.172125	0.0887608	0.0900453	0.0635907	245240	RIKEN cDNA 9930111J21 gene 2	protein_coding			GO:0003674,GO:0005575,GO:0008150	molecular_function|cellular_component|biological_process
A030001D20Rik	43.2212	40.6633	45.7792	1.12487	0.169757	0.681945	0.871452	Up	0.784309	0.621333	1.14124	0.70473	0.714929	0.576636	100126243	RIKEN cDNA A030001D20 gene	non_coding			GO:0003674,GO:0005575,GO:0008150	molecular_function|cellular_component|biological_process
A130010J15Rik	245.524	254.813	236.234	0.92735	-0.108814	0.571013	0.813369	Down	1.89981	1.69845	1.49563	1.51558	1.64733	1.70833	319266	RIKEN cDNA A130010J15 gene	protein_coding			GO:0003674,GO:0005575,GO:0008150	molecular_function|cellular_component|biological_process
A130051J06Rik	17.7372	26.2286	9.24585	0.352243	-1.50536	0.0210233	0.127746	Down	0.0265832	0.0467414	0.0477825	0.092401	0.0669558	0.145637	791370	RIKEN cDNA A130051J0 gene	non_coding			GO:0003674,GO:0005575,GO:0008150	molecular_function|cellular_component|biological_process
A1cf	107.105	47.6997	166.509	3.49085	1.80358	0.184996	0.487896	Up	0.0193598	0.865152	1.33569	0.242255	0.0637158	0.256481	69865	APOBEC1 complementation factor	protein_coding			GO:0000792,GO:0003676,GO:0003723,GO:0003727,GO:0003729,GO:0005515,GO:0005634,GO:0005654,GO:0005737,GO:0005783,GO:0006397,GO:0007566,GO:0010609,GO:0016554,GO:0016556,GO:0030895,GO:0045293,GO:0050714,GO:0050821,GO:0140767,GO:1901537,GO:2000623	heterochromatin|nucleic acid binding|RNA binding|single-stranded RNA binding|mRNA binding|protein binding|nucleus|nucleoplasm|cytoplasm|endoplasmic reticulum|mRNA processing|embryo implantation|mRNA localization resulting in post-transcriptional regulation of gene expression|cytidine to uridine editing|mRNA modification|apolipoprotein B mRNA editing enzyme complex|mRNA editing complex|positive re…			R-MMU-72200,R-MMU-75072,R-MMU-75094,R-MMU-8953854	mRNA Editing: C to U Conversion|mRNA Editing|Formation of the Editosome|Metabolism of RNA
A230001M10Rik	13.2539	16.2724	10.2354	0.629983	-0.666615	0.442715	0.735057	Down	0.282171	0.17365	0.0443795	0.179814	0.397999	0.131166	319951	RIKEN cDNA A230001M10 gene	non_coding			GO:0003674,GO:0005575,GO:0008150	molecular_function|cellular_component|biological_process
A230028O05Rik	1.77102	1.51439	2.02764	1.33565	0.417537	0.802991	0.926491	Up	0.0282474	0.00891471	0.0296181	0.0109095	0.0221348	0.0109423	319487	RIKEN cDNA A230028O05 gene	non_coding			GO:0003674,GO:0005575,GO:0008150	molecular_function|cellular_component|biological_process
A230045G11Rik	151.19	152.455	149.924	0.982978	-0.0247693	0.917176	0.972092	Down	0.572247	0.476659	0.577064	0.387672	0.540304	0.537828	624086	RIKEN cDNA A230045G11 gene	non_coding			GO:0003674,GO:0005575,GO:0008150	molecular_function|cellular_component|biological_process
A230056P14Rik	8.04301	4.56379	11.5222	2.5258	1.33674	0.146977	0.429865	Up	0.355636	0.141772	0.255137	0.108435	0.110005	0.0435042	320845	RIKEN cDNA A230056P14 gene	non_coding			GO:0003674,GO:0005575,GO:0008150	molecular_function|cellular_component|biological_process
A230057D06Rik	3.77858	2.65333	4.90382	1.84658	0.884857	0.515114	0.783045	Up	0.118106	0.0248491	0.0825583	0.0152047	0.0154248	0.0762518	319893	RIKEN cDNA A230057D06 gene	non_coding			GO:0003674,GO:0005575,GO:0008150	molecular_function|cellular_component|biological_process
A230072C01Rik	64.9012	59.1521	70.6503	1.19374	0.255491	0.465756	0.750767	Up	1.12315	0.757937	1.05236	0.53991	0.758387	0.874779	320742	RIKEN cDNA A230072C01 gene	non_coding			GO:0003674,GO:0005575,GO:0008150	molecular_function|cellular_component|biological_process
A230087F16Rik	2.84917	3.41937	2.27897	0.668399	-0.581219	0.686547	0.873368	Down	0.0215149	0.00339498	0.00375981	0.012464	0.0126444	0.0125014	100503323	RIKEN cDNA A230087F16 gene	non_coding			GO:0003674,GO:0005575,GO:0008150	molecular_function|cellular_component|biological_process
A230103J11Rik	3.64923	2.62978	4.66867	1.76715	0.821423	0.573793	0.814685	Up	0.0493403	0.0350358	0.116403	0	0.0724936	0.0286695	320466	RIKEN cDNA A230103J11 gene	non_coding			GO:0003674,GO:0005575,GO:0008150	molecular_function|cellular_component|biological_process
A230107N01Rik	9.10015	8.68736	9.51294	1.09334	0.128745	0.878344	0.957152	Up	0.100803	0.137855	0.129182	0.0519085	0.171144	0.0780964	320919	RIKEN cDNA A230107N01 gene	non_coding			GO:0003674,GO:0005575,GO:0008150	molecular_function|cellular_component|biological_process
A2m	21126.2	10846.3	31406	2.89554	1.53383	4.27338e-08	2.70878e-06	Up	144.996	133.016	165.601	40.3706	27.0318	67.8854	232345	alpha-2-macroglobulin	protein_coding	mmu04610	Complement and coagulation cascades	GO:0001869,GO:0002020,GO:0004866,GO:0004867,GO:0005102,GO:0005515,GO:0005576,GO:0005615,GO:0007565,GO:0010466,GO:0010951,GO:0019838,GO:0019899,GO:0019959,GO:0019966,GO:0030414,GO:0042802,GO:0043120,GO:0048306,GO:0048403,GO:0048406,GO:0048863	negative regulation of complement activation, lectin pathway|protease binding|endopeptidase inhibitor activity|serine-type endopeptidase inhibitor activity|signaling receptor binding|protein binding|extracellular region|extracellular space|female pregnancy|negative regulation of peptidase activity|negative regulation of endopeptidase activity|growth factor binding|enzyme binding|interleukin-8 bin…			R-MMU-109582,R-MMU-114608,R-MMU-140837,R-MMU-140877,R-MMU-1474228,R-MMU-1474244,R-MMU-174824,R-MMU-382551,R-MMU-76002,R-MMU-76005,R-MMU-8963896,R-MMU-8963898	Hemostasis|Platelet degranulation |Intrinsic Pathway of Fibrin Clot Formation|Formation of Fibrin Clot (Clotting Cascade)|Degradation of the extracellular matrix|Extracellular matrix organization|Plasma lipoprotein assembly, remodeling, and clearance|Transport of small molecules|Platelet activation, signaling and aggregation|Response to elevated platelet cytosolic Ca2+|HDL assembly|Plasma lipopro…
A2ml1	8.76383	9.14481	8.38285	0.916685	-0.125502	0.912729	0.970145	Down	0.0111956	0.0847979	0.0645635	0.0518865	0.00657967	0.0975789	232400	alpha-2-macroglobulin like 1	protein_coding			GO:0004866,GO:0004867,GO:0005575,GO:0005576,GO:0005615,GO:0010466,GO:0030414	endopeptidase inhibitor activity|serine-type endopeptidase inhibitor activity|cellular_component|extracellular region|extracellular space|negative regulation of peptidase activity|peptidase inhibitor activity
A330001L22Rik	5.10131	4.16394	6.03868	1.44913	0.535186	0.612585	0.836169	Up	0.0167676	0.0317506	0.0210975	0.00777106	0.015767	0.0194859	102632594	RIKEN cDNA A330001L22 gene	non_coding			GO:0003674,GO:0005575,GO:0008150	molecular_function|cellular_component|biological_process
A330009N23Rik	38.9956	42.9109	35.0802	0.817768	-0.290236	0.475589	0.758573	Down	0.56269	0.68696	0.543416	0.651955	0.76582	0.533453	380977	RIKEN cDNA A330009N23 gene	non_coding			GO:0003674,GO:0005575,GO:0008150	molecular_function|cellular_component|biological_process
A330015K06Rik	8.12408	7.61528	8.63288	1.13453	0.182099	0.836236	0.938679	Up	0.095761	0.14733	0.112959	0.0970834	0.0422093	0.139107	102637797	RIKEN cDNA A330015K06 gene	non_coding			GO:0003674,GO:0005575,GO:0008150	molecular_function|cellular_component|biological_process
A330023F24Rik	118.471	94.4604	142.482	1.50821	0.592836	0.101016	0.347515	Up	1.18963	0.508041	0.817414	0.445764	0.624771	0.400038	320977	RIKEN cDNA A330023F24 gene	non_coding
A330035P11Rik	57.6173	60.723	54.5116	0.898109	-0.155037	0.692531	0.875788	Down	0.717845	0.63372	0.478052	0.595694	0.798152	0.417109	319727	RIKEN cDNA A330035P11 gene	non_coding			GO:0003674,GO:0005575,GO:0008150	molecular_function|cellular_component|biological_process
A330040F15Rik	1.00637	0	2.01275	9.60273	3.26345	0.233922	0.549309	Up	0.0475558	0.0675374	0.0498634	0	0	0	74333	RIKEN cDNA A330040F15 gene	non_coding			GO:0003674,GO:0005575,GO:0008150	molecular_function|cellular_component|biological_process
A330041J22Rik	3.19011	2.65418	3.72603	1.40452	0.490082	0.69862	0.878866	Up	0.0856159	0.0540397	0.0448852	0.033066	0.0503168	0.0331652	319556	RIKEN cDNA A330041J22 gene	non_coding			GO:0003674,GO:0005575,GO:0008150	molecular_function|cellular_component|biological_process
A330049N07Rik	3.79918	3.79312	3.80524	1.0006	0.000868501	0.999538	0.999964	Up	0	0.0625912	0.110908	0.0306388	0.0310822	0.0921922	327768	RIKEN cDNA A330049N07 gene	non_coding			GO:0003674,GO:0005575,GO:0008150	molecular_function|cellular_component|biological_process
A330069E16Rik	11.278	12.1021	10.4538	0.86161	-0.214893	0.78086	0.916656	Down	0.324307	0.223308	0.525522	0.204957	0.519808	0.376882	606735	RIKEN cDNA A330069E16 gene	non_coding			GO:0003674,GO:0005575,GO:0009611	molecular_function|cellular_component|response to wounding
A330074K22Rik	1.75747	1.50219	2.01275	1.33583	0.417732	0.819194	0.931509	Up	0.0211317	0.0300106	0.0221571	0	0.0372575	0.0122787	434353	RIKEN cDNA A330074K22 gene	non_coding			GO:0003674,GO:0005575,GO:0008150	molecular_function|cellular_component|biological_process
A330076C08Rik	49.4623	58.268	40.6566	0.697962	-0.518779	0.295159	0.614093	Down	0.909649	0.578444	0.42707	0.566304	1.29262	0.583781	100503592	RIKEN cDNA A330076C08 gene	non_coding			GO:0003674,GO:0005575,GO:0008150	molecular_function|cellular_component|biological_process
A330076H08Rik	1.74354	1.16041	2.32668	2.01284	1.00923	0.63028	0.845235	Up	0.0277702	0.0262923	0.0582354	0.0482634	0	0	320026	RIKEN cDNA A330076H08 gene	non_coding			GO:0003674,GO:0005575,GO:0008150	molecular_function|cellular_component|biological_process
A330093E20Rik	1.3374	2.6748	0	0.0594862	-4.0713	0.113642	0.371984	Down	0	0	0	0.0506362	0.0256845	0.012697	107003	RIKEN cDNA A330093E20 gene	non_coding			GO:0003674,GO:0005575,GO:0008150	molecular_function|cellular_component|biological_process
A330102I10Rik	1.69517	3.39034	0	0.046875	-4.41504	0.119418	0.381149	Down	0	0	0	0	0.0871354	0.107687	77920	RIKEN cDNA A330102I10 gene	non_coding			GO:0003674,GO:0005575,GO:0008150	molecular_function|cellular_component|biological_process
A3galt2	2.32861	2.64577	2.01145	0.759855	-0.396204	0.817004	0.930757	Down	0.0387881	0	0.0162681	0.00898829	0.0273551	0.0270458	215493	alpha 1%2C3-galactosyltransferase 2 (isoglobotriaosylceramide synthase)	protein_coding	mmu00603	Glycosphingolipid biosynthesis - globo and isoglobo series	GO:0001962,GO:0005794,GO:0005975,GO:0006629,GO:0006688,GO:0016020,GO:0016740,GO:0016757,GO:0016758,GO:0030259,GO:0031982,GO:0046872,GO:0047276,GO:0071287	alpha-1,3-galactosyltransferase activity|Golgi apparatus|carbohydrate metabolic process|lipid metabolic process|glycosphingolipid biosynthetic process|membrane|transferase activity|glycosyltransferase activity|hexosyltransferase activity|lipid glycosylation|vesicle|metal ion binding|N-acetyllactosaminide 3-alpha-galactosyltransferase activity|cellular response to manganese ion
A430005L14Rik	411.858	409.377	414.338	1.012	0.0172095	0.925213	0.975143	Up	10.1792	11.9278	12.2051	9.07449	9.48734	11.5233	97159	RIKEN cDNA A430005L14 gene	protein_coding			GO:0003674,GO:0005634,GO:0005654,GO:0008150	molecular_function|nucleus|nucleoplasm|biological_process
A430018G15Rik	27.9821	32.9677	22.9966	0.696186	-0.522456	0.371285	0.680444	Down	0.172335	0.0848451	0.296344	0.167727	0.275487	0.25635	115489452	RIKEN cDNA A430018G15 gene	non_coding			GO:0003674,GO:0005575,GO:0008150	molecular_function|cellular_component|biological_process
A430033K04Rik	112.746	105.009	120.483	1.14719	0.198105	0.469021	0.75366	Up	1.27573	1.14468	1.05787	0.676259	1.01927	0.998052	243308	RIKEN cDNA A430033K04 gene	protein_coding	mmu05168	Herpes simplex virus 1 infection	GO:0000122,GO:0000977,GO:0001227,GO:0005634,GO:0006355,GO:0045667,GO:0045892,GO:0046872	negative regulation of transcription by RNA polymerase II|RNA polymerase II transcription regulatory region sequence-specific DNA binding|DNA-binding transcription repressor activity, RNA polymerase II-specific|nucleus|regulation of DNA-templated transcription|regulation of osteoblast differentiation|negative regulation of DNA-templated transcription|metal ion binding			R-MMU-212436,R-MMU-73857,R-MMU-74160	Generic Transcription Pathway|RNA Polymerase II Transcription|Gene expression (Transcription)	zf-C2H2
A430035B10Rik	9.0175	8.78958	9.24541	1.05279	0.0742196	0.93095	0.977045	Up	0.108671	0.154331	0.170916	0.204604	0.0957994	0.063144	320312	RIKEN cDNA A430035B10 gene	non_coding			GO:0003674,GO:0005575,GO:0008150	molecular_function|cellular_component|biological_process
A430046D13Rik	49.7889	43.2527	56.3251	1.30142	0.380091	0.351643	0.663461	Up	0.933598	0.516572	0.928048	0.491683	0.669815	0.450887	654440	Riken cDNA A430046D13 gene	non_coding			GO:0003674,GO:0005575,GO:0008150	molecular_function|cellular_component|biological_process
A430057M04Rik	4.32381	3.78934	4.85829	1.28323	0.359781	0.7529	0.904577	Up	0.0447727	0.0317924	0.0176045	0.0129689	0.0197348	0.0325194	319486	RIKEN cDNA A430057M04 gene	protein_coding			GO:0003674,GO:0005575,GO:0008150	molecular_function|cellular_component|biological_process
A430078I02Rik	9.27951	10.5566	8.00243	0.758112	-0.399517	0.674795	0.869056	Down	0.133349	0.0811623	0.0499356	0.0441439	0.212718	0.0553454	320486	RIKEN cDNA A430078I02 gene	non_coding			GO:0003674,GO:0005575,GO:0008150	molecular_function|cellular_component|biological_process
A430105J06Rik	10.5707	7.96803	13.1733	1.65394	0.725903	0.450507	0.740717	Up	0.10965	0.0456782	0.0459881	0.0406542	0.0618638	0.00509702	77189	RIKEN cDNA A430105J06 gene	non_coding			GO:0003674,GO:0005575,GO:0008150	molecular_function|cellular_component|biological_process
A4galt	1714.58	1745.77	1683.4	0.964296	-0.0524519	0.691228	0.875079	Down	23.2485	18.1445	20.2272	17.9129	18.445	20.1619	239559	alpha 1%2C4-galactosyltransferase	protein_coding	mmu00601,mmu00603	Glycosphingolipid biosynthesis - lacto and neolacto series|Glycosphingolipid biosynthesis - globo and isoglobo series	GO:0001576,GO:0005794,GO:0006493,GO:0006629,GO:0007009,GO:0008375,GO:0008378,GO:0015643,GO:0016020,GO:0016740,GO:0016757,GO:0050512	globoside biosynthetic process|Golgi apparatus|protein O-linked glycosylation|lipid metabolic process|plasma membrane organization|acetylglucosaminyltransferase activity|galactosyltransferase activity|toxic substance binding|membrane|transferase activity|glycosyltransferase activity|lactosylceramide 4-alpha-galactosyltransferase activity
A530013C23Rik	9.05191	16.3901	1.71371	0.105017	-3.2513	0.00292772	0.0310162	Down	0.0356507	0.0225023	0.0124602	0.220301	0.0558722	0.317632	329562	RIKEN cDNA A530013C23 gene	non_coding			GO:0003674,GO:0005575,GO:0008150	molecular_function|cellular_component|biological_process
A530016L24Rik	176.751	284.005	69.4962	0.244846	-2.03006	1.62593e-15	4.44725e-13	Down	0.76639	0.725603	0.577854	1.95553	2.82392	2.74195	319942	RIKEN cDNA A530016L24 gene	protein_coding			GO:0003674,GO:0005886,GO:0008150,GO:0016020	molecular_function|plasma membrane|biological_process|membrane
A530020G20Rik	41.1119	38.1764	44.0474	1.15194	0.204063	0.728799	0.892647	Up	0.325475	0.28174	0.819044	0.204716	0.579313	0.313398	319839	RIKEN cDNA A530020G20 gene	non_coding			GO:0003674,GO:0005575,GO:0008150	molecular_function|cellular_component|biological_process
A530032D15Rik	6.79335	4.92535	8.66136	1.75628	0.812519	0.384452	0.69171	Up	0.124637	0.0544633	0.110579	0.0333252	0.0563457	0.0557085	381287	RIKEN cDNA A530032D15Rik gene	protein_coding			GO:0000981,GO:0001650,GO:0005634,GO:0005739,GO:0006357	DNA-binding transcription factor activity, RNA polymerase II-specific|fibrillar center|nucleus|mitochondrion|regulation of transcription by RNA polymerase II
A530040E14Rik	1.15568	0	2.31135	11.0224	3.46237	0.184673	0.487359	Up	0.0280366	0.0398168	0.0440956	0	0	0	621875	RIKEN cDNA A530040E14 gene	non_coding			GO:0003674,GO:0005575,GO:0008150	molecular_function|cellular_component|biological_process
A530046M15Rik	40.8268	52.0066	29.6471	0.570092	-0.810734	0.0878653	0.321436	Down	0.837854	0.356159	0.573721	0.911336	1.1657	0.655745	328190	RIKEN cDNA A530046M15 gene	non_coding
A530064D06Rik	3.02951	3.46438	2.59463	0.750657	-0.413775	0.793354	0.922538	Down	0.0276825	0.0524185	0.0435386	0.112259	0	0.0321702	328830	RIKEN cDNA A530064D06 gene	protein_coding			GO:0005515,GO:0009986,GO:0038023	protein binding|cell surface|signaling receptor activity
A530072M11Rik	35.8822	44.7448	27.0196	0.603924	-0.72756	0.181792	0.483011	Down	0.738399	0.201664	0.402004	0.526485	0.767775	0.66008	100415915	RIKEN cDNA gene A530072M11	non_coding
A630001G21Rik	18.005	20.4758	15.5341	0.758579	-0.398628	0.477195	0.759402	Down	0.209154	0.198023	0.184676	0.191316	0.284658	0.217476	319997	RIKEN cDNA A630001G21 gene	protein_coding			GO:0000981,GO:0005634,GO:0006357	DNA-binding transcription factor activity, RNA polymerase II-specific|nucleus|regulation of transcription by RNA polymerase II
A630023A22Rik	17.8046	13.6261	21.9831	1.61367	0.690341	0.357234	0.667937	Up	0.609304	0.632705	0.247305	0.113865	0.231026	0.479668	105518	RIKEN cDNA A630023A22 gene	protein_coding			GO:0003674,GO:0005575,GO:0008150	molecular_function|cellular_component|biological_process
A630026N12Rik	131.978	109.994	153.963	1.39909	0.484487	0.112685	0.36988	Up	0.853716	0.743247	1.02375	0.511628	0.755481	0.393425	320961	RIKEN cDNA A630026N12 gene	non_coding			GO:0003674,GO:0005575,GO:0008150	molecular_function|cellular_component|biological_process
A630034I12Rik	51.7882	35.3596	68.2167	1.92881	0.947712	0.0111679	0.0820717	Up	0.161769	0.14695	0.208585	0.0886501	0.084794	0.0635114	329790	RIKEN cDNA A630034I12 gene	non_coding			GO:0003674,GO:0005575,GO:0008150	molecular_function|cellular_component|biological_process
A630066F11Rik	19.7325	27.0759	12.3891	0.457868	-1.127	0.0554119	0.240524	Down	0.314825	0.278199	0.308095	0.826808	0.493396	0.414644	320642	RIKEN cDNA A630066F11 gene	non_coding			GO:0003674,GO:0005575,GO:0008150	molecular_function|cellular_component|biological_process
A630072M18Rik	114.12	109.049	119.192	1.09312	0.128457	0.667789	0.865114	Up	0.884714	0.469441	0.662603	0.540693	0.53709	0.547964	320770	RIKEN cDNA A630072M18 gene	non_coding
A630077J23Rik	3.97704	3.08221	4.87187	1.58553	0.664967	0.684801	0.872197	Up	0.32976	0.0260175	0.115254	0.222876	0.0323002	0	319973	RIKEN cDNA A630077J23 gene	non_coding			GO:0003674,GO:0005575,GO:0008150	molecular_function|cellular_component|biological_process
A630089N07Rik	21.8354	18.5734	25.0974	1.35055	0.433544	0.527223	0.791827	Up	0.222135	0.455679	0.388191	0.228778	0.391649	0.0860489	320586	RIKEN cDNA A630089N07 gene	non_coding									zf-C2H2
A730017L22Rik	90.695	91.5852	89.8048	0.980206	-0.0288425	0.915515	0.971105	Down	1.08515	1.03789	1.32357	1.0392	0.989161	1.08092	613258	RIKEN cDNA A730017L22 gene	non_coding			GO:0003674,GO:0005575,GO:0008150	molecular_function|cellular_component|biological_process
A730020E08Rik	32.8165	31.577	34.056	1.07853	0.109065	0.800439	0.925655	Up	0.538317	0.62959	0.697247	0.587026	0.483861	0.45999	100504262	RIKEN cDNA A730020E08 gene	non_coding			GO:0003674,GO:0005575,GO:0008150	molecular_function|cellular_component|biological_process
A730020M07Rik	4.38343	7.60308	1.16377	0.152387	-2.71419	0.0468021	0.21657	Down	0	0.0180491	0.0199887	0.0662638	0.0448152	0.110771	100503044	RIKEN cDNA A730020M07 gene	non_coding			GO:0003674,GO:0005575,GO:0008150	molecular_function|cellular_component|biological_process
A730036I17Rik	45.5849	75.3515	15.8183	0.210108	-2.25079	7.47806e-08	4.40456e-06	Down	0.130228	0.159561	0.128515	0.710057	0.576266	0.480726	329513	RIKEN cDNA A730036I17 gene	non_coding			GO:0003674,GO:0005575,GO:0008150	molecular_function|cellular_component|biological_process
A730049H05Rik	23.2541	31.0046	15.5035	0.500045	-0.999871	0.0911542	0.328178	Down	0.219442	0.229633	0.16954	0.173963	0.47514	0.456345	74516	RIKEN cDNA A730049H05 gene	non_coding			GO:0003674,GO:0005575,GO:0008150	molecular_function|cellular_component|biological_process
A730056A06Rik	4.11074	5.67455	2.54693	0.450469	-1.1505	0.402785	0.706902	Down	0.0530744	0.0251249	0	0.030747	0.0727813	0.0513988	319783	RIKEN cDNA A730056A06 gene	non_coding			GO:0003674,GO:0005575,GO:0008150	molecular_function|cellular_component|biological_process
A730063M14Rik	13.1051	14.7967	11.4136	0.769177	-0.378612	0.636039	0.848269	Down	0.399671	0.756802	2.01151	1.01876	1.31537	1.3005	100504703	RIKEN cDNA A730063M14 gene	non_coding
A730081D07Rik	4.06455	1.14821	6.98089	6.09636	2.60795	0.0738166	0.288445	Up	0.0585384	0.110846	0.184137	0.0339124	0.0172016	0	102633880	RIKEN cDNA A730081D07 gene	non_coding			GO:0003674,GO:0005575,GO:0008150	molecular_function|cellular_component|biological_process
A730085K08Rik	25.1102	25.0594	25.1609	1.00521	0.00749827	0.989036	0.997076	Up	1.39391	1.84761	0.77949	1.13052	1.31073	1.13391	654800	RIKEN cDNA A730085K08 gene	non_coding			GO:0003674,GO:0005575,GO:0008150	molecular_function|cellular_component|biological_process
A730090N16Rik	6.02129	5.34496	6.69761	1.25228	0.324553	0.751018	0.903565	Up	0.0760618	0.126024	0.239258	0.154224	0.0670527	0.0883925	319798	RIKEN cDNA A730090N16 gene	non_coding			GO:0003674,GO:0005575,GO:0008150	molecular_function|cellular_component|biological_process
A830005F24Rik	2.06883	0.378386	3.75927	9.20425	3.2023	0.184326	0.486652	Up	0	0.26004	0.17999	0	0	0.0398978	442803	RIKEN cDNA A830005F24 gene	non_coding			GO:0003674,GO:0005575,GO:0008150	molecular_function|cellular_component|biological_process
A830018L16Rik	1.4545	0	2.90899	13.8651	3.79339	0.129256	0.399865	Up	0.00259276	0.0098191	0.0135929	0	0	0	320492	RIKEN cDNA A830018L16 gene	protein_coding			GO:0003674,GO:0005575,GO:0008150	molecular_function|cellular_component|biological_process
A830035A12Rik	3.95214	6.47255	1.43173	0.221764	-2.1729	0.124438	0.391005	Down	0	0.220343	0.0610055	0.471885	0.341939	0.338072	442842	RIKEN cDNA A830035A12 gene	non_coding			GO:0003674,GO:0005575,GO:0008150	molecular_function|cellular_component|biological_process
A830035O19Rik	7.33004	5.32057	9.33951	1.75239	0.809322	0.422353	0.721017	Up	0.0391928	0.136059	0.246568	0.0756839	0.0767791	0.0607287	100101457	RIKEN cDNA A830035O19 gene	non_coding			GO:0003674,GO:0005575,GO:0008150	molecular_function|cellular_component|biological_process
A830049F12Rik	40.8849	45.2457	36.5242	0.807622	-0.308248	0.475458	0.758567	Down	0.601335	0.569332	0.518422	0.727696	0.738227	0.388233	319915	RIKEN cDNA A830049F12 gene	protein_coding			GO:0003674,GO:0005575,GO:0008150	molecular_function|cellular_component|biological_process
A830052D11Rik	3.09986	3.06917	3.13055	1.02375	0.0338654	0.983496	0.994705	Up	0.0465458	0.176275	0.0244022	0.134824	0	0.0811373	402767	RIKEN cDNA A830052D11 gene	non_coding			GO:0003674,GO:0005575,GO:0008150	molecular_function|cellular_component|biological_process
A830082K12Rik	2.47824	1.49841	3.45807	2.29909	1.20106	0.525488	0.790794	Up	0.0684556	0.0216042	0.0478516	0	0.0536421	0	320174	RIKEN cDNA A830082K12 gene	non_coding			GO:0003674,GO:0005575,GO:0030182	molecular_function|cellular_component|neuron differentiation
A830082N09Rik	31.9442	30.3678	33.5205	1.10292	0.141334	0.745783	0.900577	Up	0.110695	0.123859	0.154755	0.097163	0.118283	0.0974544	414093	RIKEN cDNA A830082N09 gene	non_coding			GO:0003674,GO:0005575,GO:0008150	molecular_function|cellular_component|biological_process
A930001A20Rik	8.82165	7.64431	9.99899	1.31141	0.391119	0.677332	0.869878	Up	0.299412	0.173236	0.104647	0.192728	0.0391034	0.154645	77127	RIKEN cDNA A930001A20 gene	non_coding			GO:0003674,GO:0005575,GO:0008150	molecular_function|cellular_component|biological_process
A930001C03Rik	17.8083	15.5387	20.0779	1.29024	0.367643	0.633013	0.846518	Up	0.242483	0.480027	0.808974	0.178786	0.233195	0.640438	319314	RIKEN cDNA A930001C03 gene	non_coding			GO:0003674,GO:0005575,GO:0008150	molecular_function|cellular_component|biological_process
A930004D18Rik	124.878	110.556	139.201	1.25864	0.331862	0.170961	0.467008	Up	1.13996	0.997318	1.34657	0.81087	0.831085	0.804917	77940	RIKEN cDNA A930004D18 gene	non_coding			GO:0003674,GO:0005575,GO:0008150	molecular_function|cellular_component|biological_process
A930005H10Rik	65.1236	69.4532	60.7941	0.875792	-0.191339	0.60126	0.829443	Down	1.19708	1.73548	0.9806	1.17027	1.42904	1.39114	68161	RIKEN cDNA A930005H10 gene	non_coding			GO:0003674,GO:0005575,GO:0008150	molecular_function|cellular_component|biological_process
A930006K02Rik	19.0995	19.6345	18.5644	0.943756	-0.0835135	0.906907	0.968353	Down	0.777458	0.384043	1.02784	0.352484	1.23168	0.471389	100503120	RIKEN cDNA A930006K02 gene	non_coding			GO:0003674,GO:0005575,GO:0008150	molecular_function|cellular_component|biological_process
A930007A09Rik	95.1161	86.606	103.626	1.19667	0.25903	0.324507	0.642292	Up	0.853671	0.751851	0.770198	0.590391	0.645605	0.522948	432999	RIKEN cDNA A930007A09 gene	protein_coding			GO:0003674,GO:0005575,GO:0008150	molecular_function|cellular_component|biological_process
A930007I19Rik	20.417	20.475	20.3591	0.992327	-0.0111119	0.985214	0.995414	Down	0.181603	0.204176	0.416533	0.184111	0.266822	0.263804	77779	RIKEN cDNA A930007I19 gene	non_coding			GO:0003674,GO:0005575,GO:0008150	molecular_function|cellular_component|biological_process
A930012L18Rik	2.51823	3.02415	2.01232	0.66496	-0.58866	0.681314	0.871313	Down	0.0333736	0.021065	0.0233287	0.0128893	0.0392275	0.0517119	626275	RIKEN cDNA A930012L18 gene	non_coding			GO:0003674,GO:0005575,GO:0008150	molecular_function|cellular_component|biological_process
A930013F10Rik	23.5816	14.697	32.4662	2.20461	1.14053	0.116431	0.375454	Up	0.301908	0.357301	0.553977	0.0624648	0.342191	0.087713	68074	RIKEN cDNA A930013F10 gene	non_coding			GO:0003674,GO:0005575,GO:0008150	molecular_function|cellular_component|biological_process
A930015D03Rik	439.272	435.867	442.678	1.01596	0.0228413	0.927193	0.975882	Up	19.4193	17.2328	13.77	19.2203	12.7669	11.8575	77810	RIKEN cDNA A930015D03 gene	non_coding			GO:0003674,GO:0005575,GO:0008150	molecular_function|cellular_component|biological_process
A930017K11Rik	97.808	105.715	89.9013	0.851007	-0.232758	0.411247	0.71254	Down	1.12064	0.930552	0.809031	1.10685	1.0041	0.864652	100034748	RIKEN cDNA A930017K11 gene	protein_coding			GO:0003674,GO:0005575,GO:0008150	molecular_function|cellular_component|biological_process
A930018O16Rik	1.27347	0	2.54693	12.1612	3.60421	0.249103	0.56553	Up	0.138778	0.065696	0	0	0	0	105245580	RIKEN cDNA A930018O16 gene	protein_coding			GO:0003674,GO:0005575,GO:0008150	molecular_function|cellular_component|biological_process
A930018P22Rik	2.42176	1.889	2.95453	1.55672	0.638512	0.723873	0.890546	Up	0.0642207	0	0.269348	0.0372043	0.113228	0.0373159	68243	RIKEN cDNA A930018P22 gene	protein_coding			GO:0003674,GO:0008150	molecular_function|biological_process
A930024E05Rik	12.6049	11.0944	14.1154	1.27123	0.346231	0.728501	0.89262	Up	0.0970931	0.0919259	0.494479	0.289275	0.130427	0.0483571	109202	RIKEN cDNA A930024E05 gene	non_coding			GO:0003674,GO:0005575,GO:0008150	molecular_function|cellular_component|biological_process
A930033H14Rik	21.17	18.1765	24.1634	1.32668	0.407821	0.520443	0.786958	Up	0.159438	0.184498	0.399361	0.123154	0.239461	0.133817	320700	RIKEN cDNA A930033H14 gene	protein_coding			GO:0003674,GO:0005575,GO:0008150	molecular_function|cellular_component|biological_process
A930037H05Rik	6.92574	8.33252	5.51895	0.660558	-0.598242	0.523908	0.789917	Down	0.0272052	0.0601005	0.0855759	0.052535	0.0959315	0.0843082	78439	RIKEN cDNA A930037H05 gene	non_coding			GO:0003674,GO:0005575,GO:0008150	molecular_function|cellular_component|biological_process
A930038B10Rik	9.81912	10.219	9.41927	0.922399	-0.116538	0.902279	0.966486	Down	0.0782331	0.0854649	0.0315497	0.0209178	0.0424411	0.125883	320323	RIKEN cDNA A930038B10 gene	non_coding			GO:0003674,GO:0005575,GO:0008150	molecular_function|cellular_component|biological_process
A930041C12Rik	1.64194	3.0006	0.283282	0.103098	-3.27792	0.213873	0.525717	Down	0	0.0463665	0	0	0.40294	0.0569119	78443	RIKEN cDNA A930041C12 gene	non_coding			GO:0003674,GO:0005575,GO:0008150	molecular_function|cellular_component|biological_process
AA386476	51.8271	40.5489	63.1054	1.55442	0.636379	0.108983	0.36213	Up	0.218908	0.188697	0.308324	0.105997	0.176658	0.1253	546058	expressed sequence AA386476	non_coding			GO:0003674,GO:0005575,GO:0008150	molecular_function|cellular_component|biological_process
AA414768	766.032	743.926	788.138	1.05944	0.0833084	0.603523	0.830957	Up	13.0468	14.799	15.1007	12.1407	10.631	13.1476	245350	expressed sequence AA414768	protein_coding	mmu04120	Ubiquitin mediated proteolysis
AA465934	6.15888	5.66699	6.65078	1.17102	0.22777	0.819205	0.931509	Up	0.413063	0.521441	0.64966	0.239296	0.728276	0.240013	613254	expressed sequence AA465934	non_coding			GO:0003674,GO:0005575,GO:0008150	molecular_function|cellular_component|biological_process
AA467197	558.127	471.653	644.6	1.3666	0.450593	0.0323452	0.17131	Up	32.0922	31.9016	27.6176	14.5686	20.8651	24.1628	433470	expressed sequence AA467197	protein_coding			GO:0005634,GO:0005739,GO:0005751,GO:0009617	nucleus|mitochondrion|mitochondrial respiratory chain complex IV|response to bacterium
AA543186	19.5649	12.9535	26.1763	2.02322	1.01665	0.0777011	0.297385	Up	0.573726	0.396384	0.43898	0.26949	0.18226	0.162179	100272219	expressed sequence AA543186	non_coding
AA986860	958.347	1231.3	685.399	0.556617	-0.845244	0.00946052	0.0730748	Down	4.74618	8.1655	8.46476	8.74621	7.96956	17.4188	212439	expressed sequence AA986860	protein_coding			GO:0003674,GO:0005737,GO:0005829,GO:0005886,GO:0008150	molecular_function|cytoplasm|cytosol|plasma membrane|biological_process
AAdacl4fm3	35.3658	31.3965	39.3351	1.2514	0.323546	0.547421	0.801875	Up	0.831492	0.714009	1.09487	0.448093	1.06826	0.359549	546849	AADACL4 family member 3	protein_coding			GO:0005575	cellular_component
AB010352	206.494	183.271	229.718	1.25368	0.326172	0.185925	0.488664	Up	0.830556	0.548506	0.666582	0.540559	0.512225	0.387272	105246961	cDNA sequence AB010352	protein_coding	mmu05168	Herpes simplex virus 1 infection	GO:0003674,GO:0005575,GO:0008150	molecular_function|cellular_component|biological_process
AB124611	49.3975	44.7721	54.0228	1.20565	0.269809	0.460373	0.747399	Up	0.714701	0.789443	0.971421	0.50605	0.637827	0.676756	382062	cDNA sequence AB124611	protein_coding			GO:0003674,GO:0005575,GO:0008150,GO:0016020	molecular_function|cellular_component|biological_process|membrane
AI182371	16.1711	7.95035	24.3919	3.06446	1.61563	0.0894499	0.324795	Up	0.0266537	0.353294	0.363312	0.0514701	0.10443	0.0619494	98870	expressed sequence AI182371	protein_coding			GO:0003674,GO:0005575,GO:0008150	molecular_function|cellular_component|biological_process
AI225912	16.303	12.9846	19.6213	1.51269	0.597112	0.390629	0.69665	Up	0.0847092	0.0802011	0.0968942	0.07138	0.0181032	0.0626448	102015	expressed sequence AI225912	non_coding
AI314278	72.8232	55.4503	90.1962	1.62608	0.7014	0.352606	0.664063	Up	0.0997409	1.32206	2.0219	0.539298	0.508023	0.837131	101521	expressed sequence AI314278	non_coding			GO:0003674,GO:0005575,GO:0008150	molecular_function|cellular_component|biological_process
AI429214	190.937	189.054	192.819	1.0197	0.028139	0.887474	0.961214	Up	3.02049	2.82161	3.12482	2.44198	2.93491	2.4181	621080	expressed sequence AI429214	protein_coding			GO:0003674,GO:0005575,GO:0008150	molecular_function|cellular_component|biological_process
AI450353	9.99253	7.9129	12.0722	1.52349	0.607384	0.530435	0.793169	Up	0.385709	0.132794	0.220596	0.0203135	0.226683	0.18337	103729	expressed sequence AI450353	non_coding			GO:0003674,GO:0005575,GO:0008150	molecular_function|cellular_component|biological_process
AI463170	1.32073	0	2.64147	12.5873	3.65389	0.238478	0.5542	Up	0	0.138327	0.306383	0	0	0	100504549	expressed sequence AI463170	non_coding			GO:0003674,GO:0005575,GO:0008150	molecular_function|cellular_component|biological_process
AI463229	1.32868	0.378386	2.27897	5.58855	2.48247	0.302064	0.620519	Up	0.0790532	0.0124743	0.0138149	0	0	0.0153115	100042802	expressed sequence AI463229	non_coding			GO:0003674,GO:0005575,GO:0008150	molecular_function|cellular_component|biological_process
AI467606	241.881	303.477	180.285	0.594084	-0.751261	0.0540367	0.23708	Down	1.2432	3.9159	2.21849	2.96393	3.83581	4.3481	101602	expressed sequence AI467606	protein_coding			GO:0003674,GO:0005575,GO:0008150,GO:0016020	molecular_function|cellular_component|biological_process|membrane
AI504432	22.3353	28.4001	16.2705	0.571582	-0.806968	0.171907	0.468723	Down	0.0758972	0.0583846	0.134291	0.0879374	0.167269	0.159865	229694	expressed sequence AI504432	non_coding			GO:0003674,GO:0005575,GO:0008150	molecular_function|cellular_component|biological_process
AI506816	240.148	189.521	290.775	1.53449	0.617755	0.0836498	0.31177	Up	4.59748	3.24222	1.68621	1.44679	2.30167	1.76994	433855	expressed sequence AI506816	non_coding			GO:0009611	response to wounding
AI593442	1.82932	0.749205	2.90943	3.86377	1.95001	0.428848	0.724188	Up	0	0.0145624	0.0161273	0	0.00723155	0	330941	expressed sequence AI593442	protein_coding			GO:0003674,GO:0005575,GO:0008150,GO:0016020	molecular_function|cellular_component|biological_process|membrane
AI597479	1214.48	1266.97	1162	0.917248	-0.124617	0.401067	0.705516	Down	11.7913	9.5144	9.33241	10.2684	10.3455	8.94661	98404	expressed sequence AI597479	protein_coding			GO:0003674,GO:0005634,GO:0005654,GO:0008150,GO:0048598,GO:0072669	molecular_function|nucleus|nucleoplasm|biological_process|embryonic morphogenesis|tRNA-splicing ligase complex
AI606473	1.02191	0	2.04383	9.73769	3.28358	0.240051	0.555477	Up	0.0121527	0.0230118	0.0509694	0	0	0	99686	expressed sequence AI606473	non_coding			GO:0003674,GO:0005575,GO:0008150	molecular_function|cellular_component|biological_process
AI661453	4340.15	4863.66	3816.64	0.784767	-0.349663	0.0257428	0.146988	Down	26.7844	22.6573	19.6342	28.5326	24.6393	24.6947	224833	expressed sequence AI661453	protein_coding			GO:0003674,GO:0005575,GO:0008150	molecular_function|cellular_component|biological_process
AI662270	145.432	177.208	113.656	0.640878	-0.641878	0.012976	0.0918278	Down	2.09192	2.22816	3.03554	3.05136	3.97368	3.14733	100043636	expressed sequence AI662270	non_coding			GO:0003674,GO:0005575,GO:0008150	molecular_function|cellular_component|biological_process
AI837181	733.134	751.193	715.075	0.95198	-0.0709961	0.569366	0.813192	Down	13.9997	14.076	14.0191	13.0672	12.9763	13.1459	107242	expressed sequence AI837181	protein_coding			GO:0003674,GO:0005575,GO:0008150	molecular_function|cellular_component|biological_process
AI839979	18.0325	14.4006	21.6643	1.5027	0.58756	0.330795	0.647318	Up	0.560494	0.466985	0.658214	0.207811	0.316228	0.468978	100740	expressed sequence AI839979	non_coding			GO:0003674,GO:0005575,GO:0008150	molecular_function|cellular_component|biological_process
AI854703	51.4129	43.9527	58.8732	1.33783	0.419895	0.337095	0.651449	Up	0.428667	0.315664	0.649231	0.204975	0.335905	0.37955	243373	expressed sequence AI854703	protein_coding			GO:0000978,GO:0003700,GO:0006357	RNA polymerase II cis-regulatory region sequence-specific DNA binding|DNA-binding transcription factor activity|regulation of transcription by RNA polymerase II
AI987944	331.806	323.69	339.923	1.05017	0.0706192	0.719393	0.888607	Up	3.19743	2.14566	2.74237	2.29261	2.39822	2.10853	233168	expressed sequence AI987944	protein_coding	mmu05168	Herpes simplex virus 1 infection	GO:0000122,GO:0000977,GO:0001227	negative regulation of transcription by RNA polymerase II|RNA polymerase II transcription regulatory region sequence-specific DNA binding|DNA-binding transcription repressor activity, RNA polymerase II-specific					zf-C2H2
ATP6	1521.24	1430.16	1612.32	1.12737	0.172958	0.458952	0.74655	Up	73.5273	57.7315	84.9504	71.2764	58.0551	39.7168	17705		protein_coding	mmu00190,mmu04714,mmu05208,mmu05010,mmu05012,mmu05014,mmu05016,mmu05020,mmu05022,mmu05415	Oxidative phosphorylation|Thermogenesis|Chemical carcinogenesis - reactive oxygen species|Alzheimer disease|Parkinson disease|Amyotrophic lateral sclerosis|Huntington disease|Prion disease|Pathways of neurodegeneration - multiple diseases|Diabetic cardiomyopathy	GO:0005739,GO:0005753,GO:0015986,GO:0042776,GO:0046933	mitochondrion|mitochondrial proton-transporting ATP synthase complex|proton motive force-driven ATP synthesis|proton motive force-driven mitochondrial ATP synthesis|proton-transporting ATP synthase activity, rotational mechanism	WP295,WP1248	Electron transport chain|Oxidative phosphorylation	R-MMU-1428517,R-MMU-1430728,R-MMU-1592230,R-MMU-163200,R-MMU-163210,R-MMU-1852241,R-MMU-8949613	The citric acid (TCA) cycle and respiratory electron transport|Metabolism|Mitochondrial biogenesis|Respiratory electron transport, ATP synthesis by chemiosmotic coupling, and heat production by uncoupling proteins.|Formation of ATP by chemiosmotic coupling|Organelle biogenesis and maintenance|Cristae formation
ATP8	64.3551	60.9743	67.7359	1.10993	0.150466	0.776271	0.914095	Up	9.15286	5.73649	15.5444	6.87076	13.3343	4.04493	17706		protein_coding	mmu00190,mmu04714,mmu05208,mmu05010,mmu05012,mmu05014,mmu05016,mmu05020,mmu05022,mmu05415	Oxidative phosphorylation|Thermogenesis|Chemical carcinogenesis - reactive oxygen species|Alzheimer disease|Parkinson disease|Amyotrophic lateral sclerosis|Huntington disease|Prion disease|Pathways of neurodegeneration - multiple diseases|Diabetic cardiomyopathy	GO:0000276,GO:0005739,GO:0005753,GO:0006754,GO:0006811,GO:0015078,GO:0015986,GO:0016020,GO:0042776,GO:0045263,GO:0046933,GO:1902600	mitochondrial proton-transporting ATP synthase complex, coupling factor F(o)|mitochondrion|mitochondrial proton-transporting ATP synthase complex|ATP biosynthetic process|monoatomic ion transport|proton transmembrane transporter activity|proton motive force-driven ATP synthesis|membrane|proton motive force-driven mitochondrial ATP synthesis|proton-transporting ATP synthase complex, coupling facto…	WP295,WP1248	Electron transport chain|Oxidative phosphorylation	R-MMU-1428517,R-MMU-1430728,R-MMU-1592230,R-MMU-163200,R-MMU-163210,R-MMU-1852241,R-MMU-8949613	The citric acid (TCA) cycle and respiratory electron transport|Metabolism|Mitochondrial biogenesis|Respiratory electron transport, ATP synthesis by chemiosmotic coupling, and heat production by uncoupling proteins.|Formation of ATP by chemiosmotic coupling|Organelle biogenesis and maintenance|Cristae formation
AU015791	76.9267	95.3428	58.5105	0.613748	-0.704283	0.133163	0.405875	Down	2.81092	1.27949	1.41698	1.84763	4.25705	1.85318	104932	expressed sequence AU015791	non_coding			GO:0003674,GO:0005575,GO:0008150	molecular_function|cellular_component|biological_process
AU015836	7675.11	10161.1	5189.13	0.510693	-0.969471	1.98169e-09	1.78236e-07	Down	56.8921	50.5611	50.1028	102.065	98.6379	72.3701	385493	expressed sequence AU015836	non_coding			GO:0005758,GO:0015035,GO:0022417,GO:0045041	mitochondrial intermembrane space|protein-disulfide reductase activity|protein maturation by protein folding|protein import into mitochondrial intermembrane space
AU018091	3522.67	3315.48	3729.87	1.12502	0.169957	0.459867	0.747161	Up	42.6005	29.5696	26.4872	30.1523	28.4645	18.8651	245128	expressed sequence AU018091	protein_coding			GO:0000064,GO:0005886,GO:0015189,GO:0097638,GO:1903352	L-ornithine transmembrane transporter activity|plasma membrane|L-lysine transmembrane transporter activity|L-arginine import across plasma membrane|L-ornithine transmembrane transport
AU020206	180.458	193.747	167.169	0.862245	-0.213831	0.46532	0.750643	Down	3.00338	3.02127	4.86145	3.1536	4.83195	3.20669	108167440	expressed sequence AU020206	non_coding			GO:0003674,GO:0005575,GO:0008150	molecular_function|cellular_component|biological_process
AU021092	315.067	395.089	235.045	0.594853	-0.749394	2.05673e-05	0.000568004	Down	5.56348	4.69212	5.21625	6.99607	8.77121	7.28185	239691	expressed sequence AU021092	protein_coding			GO:0003674,GO:0005576,GO:0005829,GO:0008150,GO:0016020,GO:0042803	molecular_function|extracellular region|cytosol|biological_process|membrane|protein homodimerization activity
AU022252	522.46	512.606	532.315	1.03869	0.05477	0.75815	0.906928	Up	3.00883	3.0675	2.42791	2.52224	2.5859	2.15919	230696	expressed sequence AU022252	protein_coding			GO:0003674,GO:0005575,GO:0008150,GO:0042802	molecular_function|cellular_component|biological_process|identical protein binding
AU022754	19.0129	20.544	17.4817	0.85174	-0.231515	0.74603	0.900604	Down	0.265104	0.142231	0.129719	0.245728	0.249284	0.0616163	105975	expressed sequence AU022754	non_coding			GO:0003674,GO:0005575,GO:0008150	molecular_function|cellular_component|biological_process
AU022793	4.15613	5.70273	2.60952	0.456679	-1.13075	0.320432	0.638402	Down	0.0422351	0.0266582	0.059046	0.0815587	0.0661912	0.0981639	105976	expressed sequence AU022793	non_coding			GO:0003674,GO:0005575,GO:0008150	molecular_function|cellular_component|biological_process
AU040320	2364.46	2639.38	2089.54	0.791749	-0.336885	0.0366931	0.186154	Down	12.9767	11.7872	9.87457	14.4304	12.646	11.6569	100317	expressed sequence AU040320	protein_coding			GO:0001675,GO:0001764,GO:0003674,GO:0005730,GO:0005794,GO:0005802,GO:0005886,GO:0007283,GO:0010996,GO:0016020,GO:0019065,GO:0030317,GO:0031410,GO:0120211	acrosome assembly|neuron migration|molecular_function|nucleolus|Golgi apparatus|trans-Golgi network|plasma membrane|spermatogenesis|response to auditory stimulus|membrane|receptor-mediated endocytosis of virus by host cell|flagellated sperm motility|cytoplasmic vesicle|proacrosomal vesicle fusion
AU041133	189.446	186.085	192.807	1.0358	0.0507479	0.816355	0.930679	Up	1.08832	1.16881	1.35687	1.02258	1.17103	0.899799	216177	expressed sequence AU041133	protein_coding	mmu05168	Herpes simplex virus 1 infection	GO:0000122,GO:0000977,GO:0001227	negative regulation of transcription by RNA polymerase II|RNA polymerase II transcription regulatory region sequence-specific DNA binding|DNA-binding transcription repressor activity, RNA polymerase II-specific					zf-C2H2
AV039307	6.41893	6.40778	6.43008	0.999682	-0.000459062	0.99967	0.999964	Down	0.0592305	0.112157	0.26912	0.0457512	0.255273	0.0917769	100502700	expressed sequence AV039307	non_coding			GO:0003674,GO:0005575,GO:0008150	molecular_function|cellular_component|biological_process
AV051173	11.9268	9.48366	14.3699	1.51523	0.599533	0.400397	0.704753	Up	0.838863	0.635376	0.615698	0.291582	0.345102	0.584913	100502959	expressed sequence AV051173	non_coding
AV099323	13.0575	11.7275	14.3874	1.2257	0.293602	0.669517	0.866122	Up	0.12266	0.154843	0.128612	0.0568476	0.134564	0.104533	102633666	expressed sequence AV099323	non_coding			GO:0003674,GO:0005575,GO:0008150	molecular_function|cellular_component|biological_process
AW011738	121.501	155.799	87.2042	0.560159	-0.836092	0.0028785	0.0306207	Down	1.04427	1.09754	0.743355	1.60954	1.66662	1.30263	100382	expressed sequence AW011738	non_coding			GO:0003674,GO:0005575,GO:0008150	molecular_function|cellular_component|biological_process
AW046200	5.2959	7.9512	2.6406	0.330177	-1.59869	0.185153	0.487981	Down	0.0351113	0.0166214	0.110445	0.122044	0.24762	0.061205	100502619	expressed sequence AW046200	non_coding			GO:0003674,GO:0005575,GO:0008150	molecular_function|cellular_component|biological_process
AW047730	5.99929	4.54696	7.45162	1.63902	0.712837	0.467049	0.751982	Up	0.187536	0.095607	0.0907552	0.0501431	0.0847813	0.0670581	99870	expressed sequence AW047730	non_coding			GO:0003674,GO:0005575,GO:0008150	molecular_function|cellular_component|biological_process
AW112010	76.0905	76.1803	76.0007	0.99742	-0.00372642	0.992704	0.99793	Down	3.29154	2.73083	2.91756	1.57266	2.23359	4.14062	107350	expressed sequence AW112010	non_coding			GO:0003674,GO:0005575,GO:0008150	molecular_function|cellular_component|biological_process
AW146154	115.883	123.424	108.343	0.877359	-0.188761	0.479926	0.761362	Down	0.863505	0.890546	1.13984	0.973692	1.12372	0.824297	101835	expressed sequence AW146154	protein_coding	mmu05168	Herpes simplex virus 1 infection							zf-C2H2
AW209491	534.828	533.02	536.637	1.00692	0.0099443	0.957635	0.987449	Up	9.97076	7.28625	6.93792	6.62726	7.82332	6.82842	105351	expressed sequence AW209491	protein_coding			GO:0003674,GO:0005575,GO:0008150	molecular_function|cellular_component|biological_process
AW551984	111.593	103.558	119.629	1.15451	0.207284	0.690539	0.874596	Up	0.289487	0.765535	1.0048	0.318062	0.903461	0.377019	244810	expressed sequence AW551984	protein_coding			GO:0003674,GO:0005654,GO:0055007,GO:0060923	molecular_function|nucleoplasm|cardiac muscle cell differentiation|cardiac muscle cell fate commitment
AW554918	219.377	190.618	248.135	1.30186	0.380575	0.0956728	0.337356	Up	0.369198	0.389271	0.442834	0.322446	0.272867	0.221026	225289	expressed sequence AW554918	protein_coding			GO:0003674,GO:0005575,GO:0008150	molecular_function|cellular_component|biological_process
AW822252	165.262	183.34	147.185	0.802314	-0.317761	0.207269	0.516645	Down	3.94111	3.38587	5.10166	3.91802	4.46083	5.31508	331578	expressed sequence AW822252	non_coding			GO:0003674,GO:0005575,GO:0008150	molecular_function|cellular_component|biological_process
AY036118	2.60131	2.27873	2.92388	1.28014	0.356307	0.83385	0.937693	Up	0.0373291	0.0353425	0.117421	0.0216255	0	0.108452	101056014	cDNA sequence AY036118	non_coding			GO:0008284,GO:0030097	positive regulation of cell population proliferation|hemopoiesis
AY358078	4.21362	5.28397	3.14327	0.595238	-0.748461	0.567374	0.811995	Down	0.144002	0.0170423	0.0377474	0.0417116	0.169261	0.0836734	278676	cDNA sequence AY358078	protein_coding			GO:0003674,GO:0005575,GO:0008150	molecular_function|cellular_component|biological_process
Aaas	512.147	444.818	579.477	1.30295	0.381777	0.0356198	0.182779	Up	10.2384	9.63868	9.17124	6.62763	5.48096	7.6236	223921	achalasia%2C adrenocortical insufficiency%2C alacrimia	protein_coding	mmu03013	Nucleocytoplasmic transport	GO:0000922,GO:0001578,GO:0003674,GO:0005634,GO:0005635,GO:0005643,GO:0005654,GO:0005737,GO:0005813,GO:0005829,GO:0005856,GO:0006913,GO:0007612,GO:0009566,GO:0015031,GO:0031965,GO:0051028,GO:0072686,GO:0090307	spindle pole|microtubule bundle formation|molecular_function|nucleus|nuclear envelope|nuclear pore|nucleoplasm|cytoplasm|centrosome|cytosol|cytoskeleton|nucleocytoplasmic transport|learning|fertilization|protein transport|nuclear membrane|mRNA transport|mitotic spindle|mitotic spindle assembly			R-MMU-1430728,R-MMU-159227,R-MMU-159230,R-MMU-159231,R-MMU-159234,R-MMU-159236,R-MMU-162582,R-MMU-1640170,R-MMU-170822,R-MMU-191859,R-MMU-194315,R-MMU-194441,R-MMU-211000,R-MMU-2262752,R-MMU-2980766,R-MMU-2990846,R-MMU-3108214,R-MMU-3108232,R-MMU-3232142,R-MMU-3301854,R-MMU-3371453,R-MMU-3371556,R-MMU-392499,R-MMU-4085377,R-MMU-4551638,R-MMU-4570464,R-MMU-4615885,R-MMU-5578749,R-MMU-597592,R-MMU-…	Metabolism|Transport of the SLBP independent Mature mRNA|Transport of the SLBP Dependant Mature mRNA|Transport of Mature mRNA Derived from an Intronless Transcript|Transport of Mature mRNAs Derived from Intronless Transcripts|Transport of Mature mRNA derived from an Intron-Containing Transcript|Signal Transduction|Cell Cycle|Regulation of Glucokinase by Glucokinase Regulatory Protein|snRNP Assemb…
Aacs	1547.04	1579.26	1514.83	0.959216	-0.0600721	0.658184	0.860808	Down	15.6134	12.6102	15.3027	14.3474	13.231	12.5135	78894	acetoacetyl-CoA synthetase	protein_coding	mmu00650,mmu00280	Butanoate metabolism|Valine, leucine and isoleucine degradation	GO:0000166,GO:0001889,GO:0005524,GO:0005737,GO:0006629,GO:0006631,GO:0007584,GO:0009410,GO:0010243,GO:0014070,GO:0016874,GO:0030729,GO:0032024,GO:0034201,GO:0045471,GO:0047760,GO:0071333	nucleotide binding|liver development|ATP binding|cytoplasm|lipid metabolic process|fatty acid metabolic process|response to nutrient|response to xenobiotic stimulus|response to organonitrogen compound|response to organic cyclic compound|ligase activity|acetoacetate-CoA ligase activity|positive regulation of insulin secretion|response to oleic acid|response to ethanol|butyrate-CoA ligase activity|…			R-MMU-1430728,R-MMU-556833,R-MMU-74182,R-MMU-77111	Metabolism|Metabolism of lipids|Ketone body metabolism|Synthesis of Ketone Bodies
Aadac	15.9455	1.88815	30.0028	15.8378	3.9853	0.000655075	0.00947818	Up	0.12194	0.827394	1.15071	0	0.0238882	0.094472	67758	arylacetamide deacetylase	protein_coding			GO:0004806,GO:0005783,GO:0005789,GO:0006629,GO:0010898,GO:0016020,GO:0016298,GO:0016787,GO:0017171,GO:0019213,GO:0043231,GO:0052689	triglyceride lipase activity|endoplasmic reticulum|endoplasmic reticulum membrane|lipid metabolic process|positive regulation of triglyceride catabolic process|membrane|lipase activity|hydrolase activity|serine hydrolase activity|deacetylase activity|intracellular membrane-bounded organelle|carboxylic ester hydrolase activity			R-MMU-1430728,R-MMU-211859,R-MMU-211945	Metabolism|Biological oxidations|Phase I - Functionalization of compounds
Aadacl2	2.24762	4.49523	0	0.0353564	-4.82189	0.144797	0.425986	Down	0	0	0	0	0.233293	0	639634	arylacetamide deacetylase like 2	protein_coding			GO:0005575	cellular_component
Aadacl2fm1	3.37142	6.74285	0	0.0235727	-5.40674	0.0709353	0.282156	Down	0	0	0	0	0.199499	0	229333	AADACL2 family member 1	protein_coding			GO:0005575	cellular_component
Aadacl3	3.50797	1.15199	5.86396	5.10498	2.35191	0.141723	0.421163	Up	0.0166815	0.0394843	0.113691	0.0193278	0	0.0096929	230883	arylacetamide deacetylase like 3	protein_coding			GO:0005575,GO:0016020,GO:0016787,GO:0052689	cellular_component|membrane|hydrolase activity|carboxylic ester hydrolase activity
Aadacl4fm5	9.79544	5.6632	13.9277	2.45287	1.29447	0.161439	0.452287	Up	0.293836	0.173874	0.42363	0.0638345	0.215861	0.0426839	329993	AADACL4 family member 5	protein_coding			GO:0005575	cellular_component
Aadat	13.4026	4.54905	22.2562	4.89008	2.28986	0.0913162	0.328348	Up	0.0247049	0.537973	0.375603	0.014312	0	0.157905	23923	aminoadipate aminotransferase	protein_coding	mmu00310,mmu00380	Lysine degradation|Tryptophan metabolism	GO:0003824,GO:0005739,GO:0006103,GO:0006536,GO:0008483,GO:0009058,GO:0016212,GO:0016740,GO:0030170,GO:0042803,GO:0047315,GO:0047536,GO:0047958,GO:0050094,GO:0070189,GO:1901605	catalytic activity|mitochondrion|2-oxoglutarate metabolic process|glutamate metabolic process|transaminase activity|biosynthetic process|kynurenine-oxoglutarate transaminase activity|transferase activity|pyridoxal phosphate binding|protein homodimerization activity|kynurenine-glyoxylate transaminase activity|2-aminoadipate transaminase activity|glycine:2-oxoglutarate aminotransferase activity|met…	WP79	Tryptophan metabolism	R-MMU-1430728,R-MMU-71064,R-MMU-71240,R-MMU-71291	Metabolism|Lysine catabolism|Tryptophan catabolism|Metabolism of amino acids and derivatives
Aagab	1280.95	1219.37	1342.52	1.10099	0.138796	0.234466	0.549805	Up	8.26095	7.12734	7.65438	5.7842	6.32197	6.42889	66939	alpha- and gamma-adaptin binding protein	protein_coding			GO:0003674,GO:0005737,GO:0005829,GO:0008150,GO:0015031,GO:0016607	molecular_function|cytoplasm|cytosol|biological_process|protein transport|nuclear speck
Aak1	2996.53	3111.63	2881.43	0.926033	-0.110864	0.399393	0.70398	Down	6.01846	4.901	5.91146	5.80062	5.08689	5.16635	269774	AP2 associated kinase 1	protein_coding			GO:0000166,GO:0004672,GO:0004674,GO:0005112,GO:0005524,GO:0005829,GO:0005886,GO:0005905,GO:0006468,GO:0006897,GO:0016020,GO:0016301,GO:0016310,GO:0016740,GO:0031252,GO:0032880,GO:0035612,GO:0042995,GO:0043195,GO:0043231,GO:0044305,GO:0045202,GO:0045747,GO:0050821,GO:0071439,GO:0098793,GO:0140238,GO:2000369	nucleotide binding|protein kinase activity|protein serine/threonine kinase activity|Notch binding|ATP binding|cytosol|plasma membrane|clathrin-coated pit|protein phosphorylation|endocytosis|membrane|kinase activity|phosphorylation|transferase activity|cell leading edge|regulation of protein localization|AP-2 adaptor complex binding|cell projection|terminal bouton|intracellular membrane-bounded or…			R-MMU-199991,R-MMU-5653656,R-MMU-8856825,R-MMU-8856828	Membrane Trafficking|Vesicle-mediated transport|Cargo recognition for clathrin-mediated endocytosis|Clathrin-mediated endocytosis
Aamdc	610.831	620.161	601.501	0.970014	-0.0439229	0.762506	0.908641	Down	20.6705	17.0557	17.0962	15.936	17.5267	16.595	66273	adipogenesis associated Mth938 domain containing	protein_coding			GO:0003674,GO:0005737,GO:0006366,GO:0043066,GO:0045600,GO:0045944	molecular_function|cytoplasm|transcription by RNA polymerase II|negative regulation of apoptotic process|positive regulation of fat cell differentiation|positive regulation of transcription by RNA polymerase II
Aamp	8002.33	7680.28	8324.38	1.08388	0.116205	0.263753	0.581164	Up	105.78	104.28	97.1033	80.2163	83.8967	87.1864	227290	angio-associated migratory protein	protein_coding			GO:0005829,GO:0008201,GO:0009986,GO:0015630,GO:0045171	cytosol|heparin binding|cell surface|microtubule cytoskeleton|intercellular bridge			R-MMU-109582,R-MMU-162582,R-MMU-168249,R-MMU-168256,R-MMU-168638,R-MMU-168643,R-MMU-177929,R-MMU-392518,R-MMU-428930,R-MMU-76002,R-MMU-9006934	Hemostasis|Signal Transduction|Innate Immune System|Immune System|NOD1/2 Signaling Pathway|Nucleotide-binding domain, leucine rich repeat containing receptor (NLR) signaling pathways|Signaling by EGFR|Signal amplification|Thromboxane signalling through TP receptor|Platelet activation, signaling and aggregation|Signaling by Receptor Tyrosine Kinases
Aar2	1143.89	1128.95	1158.83	1.02653	0.0377713	0.833782	0.937693	Up	10.0533	9.92378	9.12553	7.85517	6.98767	10.2744	68295	AAR2 splicing factor homolog	protein_coding			GO:0000244,GO:0003674,GO:0005575,GO:0005681,GO:0006397,GO:0008380	spliceosomal tri-snRNP complex assembly|molecular_function|cellular_component|spliceosomal complex|mRNA processing|RNA splicing
Aard	240.504	194.217	286.79	1.47654	0.562217	0.00366152	0.0364762	Up	6.26244	5.98457	7.13909	4.11395	4.05882	3.44613	239435	alanine and arginine rich domain containing protein	protein_coding			GO:0003674,GO:0005575,GO:0008150	molecular_function|cellular_component|biological_process
Aars	3080.22	3035.49	3124.95	1.02951	0.0419522	0.725882	0.891455	Up	14.467	15.9492	14.3478	12.7528	12.5964	13.2293	234734	alanyl-tRNA synthetase	protein_coding	mmu00970	Aminoacyl-tRNA biosynthesis	GO:0000049,GO:0000166,GO:0002161,GO:0002196,GO:0003676,GO:0003723,GO:0004812,GO:0004813,GO:0005515,GO:0005524,GO:0005737,GO:0005739,GO:0005829,GO:0006400,GO:0006412,GO:0006419,GO:0016597,GO:0016874,GO:0021680,GO:0043039,GO:0043524,GO:0046872,GO:0050885,GO:0050905,GO:0051402,GO:0140018	tRNA binding|nucleotide binding|aminoacyl-tRNA editing activity|Ser-tRNA(Ala) hydrolase activity|nucleic acid binding|RNA binding|aminoacyl-tRNA ligase activity|alanine-tRNA ligase activity|protein binding|ATP binding|cytoplasm|mitochondrion|cytosol|tRNA modification|translation|alanyl-tRNA aminoacylation|amino acid binding|ligase activity|cerebellar Purkinje cell layer development|tRNA aminoacyl…
Aars2	262.379	237.977	286.781	1.20556	0.269709	0.172949	0.470345	Up	2.58503	2.26471	1.9949	1.73317	1.53949	1.75439	224805	alanyl-tRNA synthetase 2%2C mitochondrial	protein_coding	mmu00970	Aminoacyl-tRNA biosynthesis	GO:0000049,GO:0000166,GO:0002161,GO:0003676,GO:0003723,GO:0004812,GO:0004813,GO:0005524,GO:0005737,GO:0005739,GO:0006412,GO:0006419,GO:0016874,GO:0043039,GO:0046872,GO:0070143	tRNA binding|nucleotide binding|aminoacyl-tRNA editing activity|nucleic acid binding|RNA binding|aminoacyl-tRNA ligase activity|alanine-tRNA ligase activity|ATP binding|cytoplasm|mitochondrion|translation|alanyl-tRNA aminoacylation|ligase activity|tRNA aminoacylation|metal ion binding|mitochondrial alanyl-tRNA aminoacylation
Aarsd1	379.454	301.33	457.578	1.51826	0.602419	0.00313879	0.0327099	Up	6.41532	8.68301	8.31118	3.94827	4.80649	4.95874	69684	alanyl-tRNA synthetase domain containing 1	protein_coding			GO:0000166,GO:0002161,GO:0002196,GO:0003676,GO:0004812,GO:0004813,GO:0005515,GO:0005524,GO:0005737,GO:0006412,GO:0006419,GO:0006450,GO:0043039,GO:0046872	nucleotide binding|aminoacyl-tRNA editing activity|Ser-tRNA(Ala) hydrolase activity|nucleic acid binding|aminoacyl-tRNA ligase activity|alanine-tRNA ligase activity|protein binding|ATP binding|cytoplasm|translation|alanyl-tRNA aminoacylation|regulation of translational fidelity|tRNA aminoacylation|metal ion binding
Aasdh	275.171	271.915	278.427	1.0237	0.0337945	0.85723	0.948323	Up	1.13808	0.880181	1.17943	0.866309	0.937177	0.957336	231326	aminoadipate-semialdehyde dehydrogenase	protein_coding			GO:0000166,GO:0003674,GO:0005524,GO:0005575,GO:0006629,GO:0006631,GO:0016874,GO:0019482,GO:0043041	nucleotide binding|molecular_function|ATP binding|cellular_component|lipid metabolic process|fatty acid metabolic process|ligase activity|beta-alanine metabolic process|amino acid activation for nonribosomal peptide biosynthetic process
Aasdhppt	805.377	796.717	814.038	1.02167	0.0309311	0.817595	0.930831	Up	7.52001	8.17915	8.7307	7.02465	7.11612	7.0558	67618	aminoadipate-semialdehyde dehydrogenase-phosphopantetheinyl transferase	protein_coding	mmu00770	Pantothenate and CoA biosynthesis	GO:0000287,GO:0005737,GO:0005829,GO:0008897,GO:0009258,GO:0016740,GO:0019878,GO:0046872,GO:0051604	magnesium ion binding|cytoplasm|cytosol|holo-[acyl-carrier-protein] synthase activity|10-formyltetrahydrofolate catabolic process|transferase activity|lysine biosynthetic process via aminoadipic acid|metal ion binding|protein maturation			R-MMU-1430728,R-MMU-196849,R-MMU-196854,R-MMU-199220	Metabolism|Metabolism of water-soluble vitamins and cofactors|Metabolism of vitamins and cofactors|Vitamin B5 (pantothenate) metabolism
Aass	281.243	279.008	283.478	1.01599	0.0228831	0.978777	0.993629	Up	0.362393	3.14178	3.41235	2.36287	1.68713	2.01488	30956	aminoadipate-semialdehyde synthase	protein_coding	mmu00310	Lysine degradation	GO:0003824,GO:0004753,GO:0005737,GO:0005739,GO:0006091,GO:0006554,GO:0008152,GO:0016491,GO:0019477,GO:0019878,GO:0043231,GO:0047130,GO:0047131	catalytic activity|saccharopine dehydrogenase activity|cytoplasm|mitochondrion|generation of precursor metabolites and energy|lysine catabolic process|metabolic process|oxidoreductase activity|L-lysine catabolic process|lysine biosynthetic process via aminoadipic acid|intracellular membrane-bounded organelle|saccharopine dehydrogenase (NADP+, L-lysine-forming) activity|saccharopine dehydrogenase …			R-MMU-1430728,R-MMU-71064,R-MMU-71291	Metabolism|Lysine catabolism|Metabolism of amino acids and derivatives
Aatf	646.058	598.812	693.304	1.15767	0.21122	0.150863	0.436373	Up	7.98069	8.33193	8.26052	5.56704	7.09261	6.19092	56321	apoptosis antagonizing transcription factor	protein_coding			GO:0005515,GO:0005634,GO:0005654,GO:0005667,GO:0005730,GO:0005737,GO:0005829,GO:0006357,GO:0007155,GO:0007346,GO:0019901,GO:0032040,GO:0032929,GO:0040016,GO:0042254,GO:0042274,GO:0042985,GO:0043066,GO:0043522,GO:0045893,GO:0045944,GO:0048156,GO:2000378,GO:2001234	protein binding|nucleus|nucleoplasm|transcription regulator complex|nucleolus|cytoplasm|cytosol|regulation of transcription by RNA polymerase II|cell adhesion|regulation of mitotic cell cycle|protein kinase binding|small-subunit processome|negative regulation of superoxide anion generation|embryonic cleavage|ribosome biogenesis|ribosomal small subunit biogenesis|negative regulation of amyloid pre…
Aatk	114.074	139.42	88.7282	0.636545	-0.651666	0.154354	0.441671	Down	0.659116	0.163854	0.320454	0.55036	0.610262	0.415078	11302	apoptosis-associated tyrosine kinase	protein_coding			GO:0000166,GO:0004672,GO:0004674,GO:0004713,GO:0005524,GO:0005737,GO:0006468,GO:0006915,GO:0007420,GO:0016020,GO:0016301,GO:0016310,GO:0016740,GO:0038083,GO:0042995,GO:0051402	nucleotide binding|protein kinase activity|protein serine/threonine kinase activity|protein tyrosine kinase activity|ATP binding|cytoplasm|protein phosphorylation|apoptotic process|brain development|membrane|kinase activity|phosphorylation|transferase activity|peptidyl-tyrosine autophosphorylation|cell projection|neuron apoptotic process
Abat	1016.87	847.074	1186.66	1.40088	0.486331	0.55815	0.808954	Up	1.59968	9.74254	11.8125	4.51534	3.08713	7.10645	268860	4-aminobutyrate aminotransferase	protein_coding	mmu00640,mmu00650,mmu00250,mmu00280,mmu00410,mmu04727	Propanoate metabolism|Butanoate metabolism|Alanine, aspartate and glutamate metabolism|Valine, leucine and isoleucine degradation|beta-Alanine metabolism|GABAergic synapse	GO:0001666,GO:0003824,GO:0003867,GO:0005739,GO:0005759,GO:0007620,GO:0007626,GO:0008483,GO:0009410,GO:0009448,GO:0009449,GO:0009450,GO:0010039,GO:0014053,GO:0016740,GO:0030170,GO:0031652,GO:0032024,GO:0032144,GO:0033602,GO:0034386,GO:0035094,GO:0035640,GO:0042135,GO:0042220,GO:0042802,GO:0045471,GO:0045776,GO:0045964,GO:0046872,GO:0047298,GO:0048148,GO:0051536,GO:0070474,GO:0097151,GO:1902722,GO:…	response to hypoxia|catalytic activity|4-aminobutyrate transaminase activity|mitochondrion|mitochondrial matrix|copulation|locomotory behavior|transaminase activity|response to xenobiotic stimulus|gamma-aminobutyric acid metabolic process|gamma-aminobutyric acid biosynthetic process|gamma-aminobutyric acid catabolic process|response to iron ion|negative regulation of gamma-aminobutyric acid secre…	WP240	Alanine and aspartate metabolism	R-MMU-112310,R-MMU-112315,R-MMU-112316,R-MMU-888590,R-MMU-916853	Neurotransmitter release cycle|Transmission across Chemical Synapses|Neuronal System|GABA synthesis, release, reuptake and degradation|Degradation of GABA
Abca1	10379.9	12708.2	8051.67	0.633587	-0.658386	5.53181e-05	0.00128435	Down	26.3236	20.636	23.4483	37.5943	33.8033	26.7591	11303	ATP-binding cassette%2C sub-family A (ABC1)%2C member 1	protein_coding	mmu02010,mmu04975,mmu04979,mmu05417	ABC transporters|Fat digestion and absorption|Cholesterol metabolism|Lipid and atherosclerosis	GO:0000166,GO:0002790,GO:0005102,GO:0005515,GO:0005524,GO:0005548,GO:0005768,GO:0005794,GO:0005886,GO:0006497,GO:0006911,GO:0007040,GO:0007186,GO:0007189,GO:0008035,GO:0008203,GO:0008320,GO:0009306,GO:0009897,GO:0009986,GO:0010875,GO:0015914,GO:0015918,GO:0016020,GO:0016197,GO:0016323,GO:0016887,GO:0019905,GO:0023061,GO:0030139,GO:0030301,GO:0031210,GO:0031267,GO:0032367,GO:0032489,GO:0033344,GO:…	nucleotide binding|peptide secretion|signaling receptor binding|protein binding|ATP binding|phospholipid transporter activity|endosome|Golgi apparatus|plasma membrane|protein lipidation|phagocytosis, engulfment|lysosome organization|G protein-coupled receptor signaling pathway|adenylate cyclase-activating G protein-coupled receptor signaling pathway|high-density lipoprotein particle binding|chole…	WP431,WP1,WP4346	Nuclear receptors in lipid metabolism and toxicity|Statin pathway|Cholesterol metabolism with Bloch and Kandutsch-Russell pathways	R-MMU-162582,R-MMU-174824,R-MMU-382551,R-MMU-8963896,R-MMU-8963898,R-MMU-9006931,R-MMU-9024446,R-MMU-9029569	Signal Transduction|Plasma lipoprotein assembly, remodeling, and clearance|Transport of small molecules|HDL assembly|Plasma lipoprotein assembly|Signaling by Nuclear Receptors|NR1H2 and NR1H3-mediated signaling|NR1H3 & NR1H2 regulate gene expression linked to cholesterol transport and efflux
Abca12	26.9321	51.5376	2.32668	0.044959	-4.47525	1.65463e-05	0.000473324	Down	0.00631944	0.00598313	0.0132522	0.0549147	0.419677	0.0330476	74591	ATP-binding cassette%2C sub-family A (ABC1)%2C member 12	protein_coding	mmu02010	ABC transporters	GO:0000139,GO:0000166,GO:0003336,GO:0005102,GO:0005319,GO:0005515,GO:0005524,GO:0005737,GO:0005743,GO:0005794,GO:0005829,GO:0005886,GO:0006672,GO:0006869,GO:0006886,GO:0010875,GO:0016020,GO:0016887,GO:0030216,GO:0031410,GO:0031424,GO:0032379,GO:0032940,GO:0033344,GO:0033700,GO:0034191,GO:0035627,GO:0042626,GO:0043129,GO:0043231,GO:0043589,GO:0045055,GO:0045616,GO:0048286,GO:0051649,GO:0055085,GO:…	Golgi membrane|nucleotide binding|corneocyte desquamation|signaling receptor binding|lipid transporter activity|protein binding|ATP binding|cytoplasm|mitochondrial inner membrane|Golgi apparatus|cytosol|plasma membrane|ceramide metabolic process|lipid transport|intracellular protein transport|positive regulation of cholesterol efflux|membrane|ATP hydrolysis activity|keratinocyte differentiation|c…			R-MMU-1369062,R-MMU-382551,R-MMU-382556	ABC transporters in lipid homeostasis|Transport of small molecules|ABC-family proteins mediated transport
Abca13	53.3172	38.3707	68.2638	1.78012	0.831975	0.0306672	0.165173	Up	0.167697	0.110841	0.0962112	0.0623227	0.0650842	0.0588326	268379	ATP-binding cassette%2C sub-family A (ABC1)%2C member 13	protein_coding	mmu02010	ABC transporters	GO:0000166,GO:0005319,GO:0005524,GO:0006869,GO:0016020,GO:0016887,GO:0031410,GO:0032376,GO:0035627,GO:0042626,GO:0043231,GO:0055085,GO:0097708,GO:0140359,GO:1900244	nucleotide binding|lipid transporter activity|ATP binding|lipid transport|membrane|ATP hydrolysis activity|cytoplasmic vesicle|positive regulation of cholesterol transport|ceramide transport|ATPase-coupled transmembrane transporter activity|intracellular membrane-bounded organelle|transmembrane transport|intracellular vesicle|ABC-type transporter activity|positive regulation of synaptic vesicle e…			R-MMU-168249,R-MMU-168256,R-MMU-6798695	Innate Immune System|Immune System|Neutrophil degranulation
Abca14	1.93084	1.53501	2.32668	1.51779	0.601974	0.736789	0.89657	Up	0.00895873	0.00848196	0.0187869	0.0155699	0.00526508	0	67928	ATP-binding cassette%2C sub-family A (ABC1)%2C member 14	protein_coding	mmu02010	ABC transporters	GO:0005319,GO:0006869,GO:0042626,GO:0043231	lipid transporter activity|lipid transport|ATPase-coupled transmembrane transporter activity|intracellular membrane-bounded organelle
Abca16	6.53434	9.06111	4.00757	0.442514	-1.1762	0.306575	0.623601	Down	0.0493125	0.00466881	0.0155116	0.0171406	0.0695547	0.0515761	233810	ATP-binding cassette%2C sub-family A (ABC1)%2C member 16	protein_coding	mmu02010	ABC transporters	GO:0005319,GO:0006869,GO:0042626,GO:0043231	lipid transporter activity|lipid transport|ATPase-coupled transmembrane transporter activity|intracellular membrane-bounded organelle
Abca17	11.6009	6.12698	17.0748	2.79273	1.48168	0.0738441	0.288445	Up	0.0521241	0.0658002	0.0874455	0.040262	0.0122534	0.0121148	381072	ATP-binding cassette%2C sub-family A (ABC1)%2C member 17	protein_coding	mmu02010	ABC transporters	GO:0000166,GO:0005319,GO:0005524,GO:0005737,GO:0005783,GO:0006629,GO:0006638,GO:0006869,GO:0016020,GO:0016887,GO:0042626,GO:0043231,GO:0055085,GO:0140359	nucleotide binding|lipid transporter activity|ATP binding|cytoplasm|endoplasmic reticulum|lipid metabolic process|neutral lipid metabolic process|lipid transport|membrane|ATP hydrolysis activity|ATPase-coupled transmembrane transporter activity|intracellular membrane-bounded organelle|transmembrane transport|ABC-type transporter activity
Abca2	401.291	380.435	422.147	1.1096	0.150037	0.323678	0.6415	Up	1.1543	1.11113	1.25832	0.966071	0.929066	0.915759	11305	ATP-binding cassette%2C sub-family A (ABC1)%2C member 2	protein_coding	mmu02010,mmu04142	ABC transporters|Lysosome	GO:0000166,GO:0001573,GO:0005319,GO:0005524,GO:0005764,GO:0005765,GO:0005768,GO:0005815,GO:0005886,GO:0006684,GO:0006687,GO:0006869,GO:0007626,GO:0008203,GO:0010008,GO:0016020,GO:0016887,GO:0019218,GO:0031410,GO:0032289,GO:0032383,GO:0032384,GO:0032805,GO:0042626,GO:0042986,GO:0043231,GO:0045939,GO:0046512,GO:0055085,GO:0060049,GO:0061135,GO:0071072,GO:0090155,GO:0090156,GO:0090370,GO:0099038,GO:…	nucleotide binding|ganglioside metabolic process|lipid transporter activity|ATP binding|lysosome|lysosomal membrane|endosome|microtubule organizing center|plasma membrane|sphingomyelin metabolic process|glycosphingolipid metabolic process|lipid transport|locomotory behavior|cholesterol metabolic process|endosome membrane|membrane|ATP hydrolysis activity|regulation of steroid metabolic process|cyt…
Abca3	3570.73	4035.33	3106.13	0.769735	-0.377567	0.0152793	0.102825	Down	12.5655	14.8265	15.5478	18.0237	14.5534	16.8233	27410	ATP-binding cassette%2C sub-family A (ABC1)%2C member 3	protein_coding	mmu02010	ABC transporters	GO:0000166,GO:0005319,GO:0005524,GO:0005764,GO:0005768,GO:0005770,GO:0005886,GO:0006810,GO:0006855,GO:0006869,GO:0008559,GO:0010875,GO:0015914,GO:0016020,GO:0016887,GO:0030324,GO:0030659,GO:0031410,GO:0032368,GO:0032464,GO:0042599,GO:0042626,GO:0042908,GO:0043129,GO:0043231,GO:0046470,GO:0046471,GO:0046618,GO:0046890,GO:0055085,GO:0055091,GO:0070925,GO:0097208,GO:0097232,GO:0097233,GO:0120019,GO:…	nucleotide binding|lipid transporter activity|ATP binding|lysosome|endosome|late endosome|plasma membrane|transport|xenobiotic transmembrane transport|lipid transport|ABC-type xenobiotic transporter activity|positive regulation of cholesterol efflux|phospholipid transport|membrane|ATP hydrolysis activity|lung development|cytoplasmic vesicle membrane|cytoplasmic vesicle|regulation of lipid transpo…			R-MMU-1369062,R-MMU-382551,R-MMU-382556,R-MMU-392499,R-MMU-5683826	ABC transporters in lipid homeostasis|Transport of small molecules|ABC-family proteins mediated transport|Metabolism of proteins|Surfactant metabolism
Abca4	86.9653	109.183	64.7473	0.593319	-0.753119	0.00779861	0.0638176	Down	0.210653	0.212563	0.197625	0.343626	0.270408	0.312446	11304	ATP-binding cassette%2C sub-family A (ABC1)%2C member 4	protein_coding	mmu02010	ABC transporters	GO:0000166,GO:0001750,GO:0005502,GO:0005503,GO:0005524,GO:0005548,GO:0005783,GO:0005886,GO:0006649,GO:0006869,GO:0007601,GO:0016020,GO:0016887,GO:0031410,GO:0042574,GO:0042626,GO:0042995,GO:0043231,GO:0045332,GO:0045494,GO:0050896,GO:0055085,GO:0090555,GO:0140326,GO:0140327,GO:0140347,GO:0140359	nucleotide binding|photoreceptor outer segment|11-cis retinal binding|all-trans retinal binding|ATP binding|phospholipid transporter activity|endoplasmic reticulum|plasma membrane|phospholipid transfer to membrane|lipid transport|visual perception|membrane|ATP hydrolysis activity|cytoplasmic vesicle|retinal metabolic process|ATPase-coupled transmembrane transporter activity|cell projection|intrac…			R-MMU-2187338,R-MMU-2453902,R-MMU-382551,R-MMU-382556,R-MMU-9709957	Visual phototransduction|The canonical retinoid cycle in rods (twilight vision)|Transport of small molecules|ABC-family proteins mediated transport|Sensory Perception
Abca5	1325.28	1253.23	1397.33	1.11495	0.156975	0.419663	0.718775	Up	4.21079	4.90508	6.2692	4.69086	3.83914	3.67376	217265	ATP-binding cassette%2C sub-family A (ABC1)%2C member 5	protein_coding	mmu02010	ABC transporters	GO:0000166,GO:0005319,GO:0005524,GO:0005764,GO:0005768,GO:0005770,GO:0005794,GO:0005886,GO:0006869,GO:0008203,GO:0010745,GO:0010874,GO:0016020,GO:0016887,GO:0033344,GO:0034375,GO:0042626,GO:0042632,GO:0043691,GO:0055085,GO:0140359,GO:1903064	nucleotide binding|lipid transporter activity|ATP binding|lysosome|endosome|late endosome|Golgi apparatus|plasma membrane|lipid transport|cholesterol metabolic process|negative regulation of macrophage derived foam cell differentiation|regulation of cholesterol efflux|membrane|ATP hydrolysis activity|cholesterol efflux|high-density lipoprotein particle remodeling|ATPase-coupled transmembrane tran…			R-MMU-1369062,R-MMU-382551,R-MMU-382556	ABC transporters in lipid homeostasis|Transport of small molecules|ABC-family proteins mediated transport
Abca6	14.8925	19.7203	10.0646	0.510435	-0.970201	0.159274	0.449036	Down	0.0253692	0.0510406	0.0332503	0.0440907	0.0559109	0.092131	76184	ATP-binding cassette%2C sub-family A (ABC1)%2C member 6	protein_coding	mmu02010	ABC transporters	GO:0000139,GO:0000166,GO:0005319,GO:0005524,GO:0005654,GO:0005794,GO:0005886,GO:0006869,GO:0016020,GO:0042626,GO:0043231,GO:0140359	Golgi membrane|nucleotide binding|lipid transporter activity|ATP binding|nucleoplasm|Golgi apparatus|plasma membrane|lipid transport|membrane|ATPase-coupled transmembrane transporter activity|intracellular membrane-bounded organelle|ABC-type transporter activity			R-MMU-1369062,R-MMU-382551,R-MMU-382556	ABC transporters in lipid homeostasis|Transport of small molecules|ABC-family proteins mediated transport
Abca7	717.635	718.271	716.999	0.998352	-0.00237939	0.986297	0.996007	Down	3.54167	3.03824	3.14316	2.99262	2.95773	2.6696	27403	ATP-binding cassette%2C sub-family A (ABC1)%2C member 7	protein_coding	mmu02010	ABC transporters	GO:0000166,GO:0001891,GO:0005515,GO:0005524,GO:0005548,GO:0005622,GO:0005737,GO:0005768,GO:0005794,GO:0005886,GO:0006869,GO:0006909,GO:0007613,GO:0008542,GO:0009986,GO:0010875,GO:0016020,GO:0016324,GO:0016887,GO:0018149,GO:0019216,GO:0030054,GO:0032587,GO:0033344,GO:0033700,GO:0034188,GO:0034205,GO:0034380,GO:0034504,GO:0038027,GO:0042626,GO:0042985,GO:0042995,GO:0043231,GO:0043409,GO:0044857,GO:…	nucleotide binding|phagocytic cup|protein binding|ATP binding|phospholipid transporter activity|intracellular anatomical structure|cytoplasm|endosome|Golgi apparatus|plasma membrane|lipid transport|phagocytosis|memory|visual learning|cell surface|positive regulation of cholesterol efflux|membrane|apical plasma membrane|ATP hydrolysis activity|peptide cross-linking|regulation of lipid metabolic pr…			R-MMU-1369062,R-MMU-382551,R-MMU-382556	ABC transporters in lipid homeostasis|Transport of small molecules|ABC-family proteins mediated transport
Abca8a	52.6212	72.3163	32.9261	0.455619	-1.1341	0.0132178	0.0930278	Down	0.176607	0.178609	0.101005	0.223226	0.448195	0.223895	217258	ATP-binding cassette%2C sub-family A (ABC1)%2C member 8a	protein_coding	mmu02010	ABC transporters	GO:0000166,GO:0005319,GO:0005524,GO:0005783,GO:0005886,GO:0006686,GO:0006869,GO:0008559,GO:0010874,GO:0010875,GO:0016020,GO:0016887,GO:0030301,GO:0033344,GO:0042626,GO:0042908,GO:0043231,GO:0055085,GO:0140359	nucleotide binding|lipid transporter activity|ATP binding|endoplasmic reticulum|plasma membrane|sphingomyelin biosynthetic process|lipid transport|ABC-type xenobiotic transporter activity|regulation of cholesterol efflux|positive regulation of cholesterol efflux|membrane|ATP hydrolysis activity|cholesterol transport|cholesterol efflux|ATPase-coupled transmembrane transporter activity|xenobiotic t…
Abca8b	68.4003	101.737	35.0633	0.344244	-1.5385	0.0178701	0.114107	Down	0.0229852	0.133681	0.241005	0.273925	0.281748	0.469358	27404	ATP-binding cassette%2C sub-family A (ABC1)%2C member 8b	protein_coding	mmu02010	ABC transporters	GO:0000166,GO:0005319,GO:0005524,GO:0005743,GO:0005783,GO:0005886,GO:0006686,GO:0006810,GO:0006869,GO:0008559,GO:0010874,GO:0010875,GO:0016020,GO:0016323,GO:0016887,GO:0030301,GO:0033344,GO:0042626,GO:0042908,GO:0043231,GO:0055085,GO:0140359	nucleotide binding|lipid transporter activity|ATP binding|mitochondrial inner membrane|endoplasmic reticulum|plasma membrane|sphingomyelin biosynthetic process|transport|lipid transport|ABC-type xenobiotic transporter activity|regulation of cholesterol efflux|positive regulation of cholesterol efflux|membrane|basolateral plasma membrane|ATP hydrolysis activity|cholesterol transport|cholesterol ef…			R-MMU-382551,R-MMU-382556	Transport of small molecules|ABC-family proteins mediated transport
Abca9	384.838	479.926	289.75	0.603537	-0.728486	0.00880392	0.0695363	Down	0.860144	1.10714	1.59879	1.76258	2.1599	1.31764	217262	ATP-binding cassette%2C sub-family A (ABC1)%2C member 9	protein_coding	mmu02010	ABC transporters	GO:0000166,GO:0005319,GO:0005524,GO:0005739,GO:0006869,GO:0016020,GO:0016887,GO:0042626,GO:0043231,GO:0055085,GO:0140359	nucleotide binding|lipid transporter activity|ATP binding|mitochondrion|lipid transport|membrane|ATP hydrolysis activity|ATPase-coupled transmembrane transporter activity|intracellular membrane-bounded organelle|transmembrane transport|ABC-type transporter activity			R-MMU-1369062,R-MMU-382551,R-MMU-382556	ABC transporters in lipid homeostasis|Transport of small molecules|ABC-family proteins mediated transport
Abcb10	1597.03	1696.27	1497.79	0.883014	-0.179492	0.11547	0.374162	Down	9.99676	10.0722	10.1638	10.0419	9.69362	10.6007	56199	ATP-binding cassette%2C sub-family B (MDR/TAP)%2C member 10	protein_coding	mmu02010	ABC transporters	GO:0000166,GO:0005515,GO:0005524,GO:0005739,GO:0005743,GO:0006783,GO:0016020,GO:0016887,GO:0031966,GO:0034514,GO:0042802,GO:0042803,GO:0045648,GO:0046985,GO:0048821,GO:0055085,GO:0140359	nucleotide binding|protein binding|ATP binding|mitochondrion|mitochondrial inner membrane|heme biosynthetic process|membrane|ATP hydrolysis activity|mitochondrial membrane|mitochondrial unfolded protein response|identical protein binding|protein homodimerization activity|positive regulation of erythrocyte differentiation|positive regulation of hemoglobin biosynthetic process|erythrocyte developme…
Abcb11	16.3256	18.5936	14.0577	0.756578	-0.40244	0.511545	0.781076	Down	0.0718167	0.089243	0.0564761	0.0676078	0.0791379	0.10954	27413	ATP-binding cassette%2C sub-family B (MDR/TAP)%2C member 11	protein_coding	mmu02010,mmu04976,mmu04979,mmu01522	ABC transporters|Bile secretion|Cholesterol metabolism|Endocrine resistance	GO:0000139,GO:0000166,GO:0005524,GO:0005768,GO:0005886,GO:0006631,GO:0006805,GO:0006855,GO:0006869,GO:0008206,GO:0008559,GO:0009410,GO:0009986,GO:0015125,GO:0015126,GO:0015144,GO:0015432,GO:0015721,GO:0015722,GO:0016020,GO:0016324,GO:0016567,GO:0016887,GO:0031998,GO:0042632,GO:0045177,GO:0046581,GO:0046618,GO:0046691,GO:0055037,GO:0055038,GO:0055085,GO:0055088,GO:0055091,GO:0120189,GO:0140359,GO:…	Golgi membrane|nucleotide binding|ATP binding|endosome|plasma membrane|fatty acid metabolic process|xenobiotic metabolic process|xenobiotic transmembrane transport|lipid transport|bile acid metabolic process|ABC-type xenobiotic transporter activity|response to xenobiotic stimulus|cell surface|bile acid transmembrane transporter activity|canalicular bile acid transmembrane transporter activity|car…	WP431	Nuclear receptors in lipid metabolism and toxicity	R-MMU-1430728,R-MMU-159418,R-MMU-192105,R-MMU-193368,R-MMU-194068,R-MMU-556833,R-MMU-8957322	Metabolism|Recycling of bile acids and salts|Synthesis of bile acids and bile salts|Synthesis of bile acids and bile salts via 7alpha-hydroxycholesterol|Bile acid and bile salt metabolism|Metabolism of lipids|Metabolism of steroids
Abcb1a	1938.13	2003.11	1873.15	0.935171	-0.0966981	0.654185	0.858164	Down	14.6096	8.4551	10.0188	11.9715	10.4013	8.79601	18671	ATP-binding cassette%2C sub-family B (MDR/TAP)%2C member 1A	protein_coding	mmu02010,mmu04976,mmu05206,mmu05226	ABC transporters|Bile secretion|MicroRNAs in cancer|Gastric cancer	GO:0000086,GO:0000166,GO:0005524,GO:0005737,GO:0005886,GO:0008559,GO:0009986,GO:0015562,GO:0016020,GO:0016324,GO:0016887,GO:0022857,GO:0031625,GO:0042626,GO:0042910,GO:0045332,GO:0046581,GO:0046865,GO:0046943,GO:0047484,GO:0055085,GO:0070633,GO:0072089,GO:0090554,GO:0090555,GO:0099038,GO:0099040,GO:0140115,GO:0140326,GO:0140328,GO:0140359,GO:1901529,GO:1905039,GO:1990961,GO:1990962,GO:2001225	G2/M transition of mitotic cell cycle|nucleotide binding|ATP binding|cytoplasm|plasma membrane|ABC-type xenobiotic transporter activity|cell surface|efflux transmembrane transporter activity|membrane|apical plasma membrane|ATP hydrolysis activity|transmembrane transporter activity|ubiquitin protein ligase binding|ATPase-coupled transmembrane transporter activity|xenobiotic transmembrane transport…	WP431	Nuclear receptors in lipid metabolism and toxicity	R-MMU-382551,R-MMU-382556,R-MMU-9748784,R-MMU-9754706,R-MMU-9757110	Transport of small molecules|ABC-family proteins mediated transport|Drug ADME|Atorvastatin ADME|Prednisone ADME
Abcb1b	3908.8	4346.05	3471.56	0.798769	-0.324149	0.226913	0.541767	Down	18.3988	17.9938	27.1045	21.006	15.9422	33.2459	18669	ATP-binding cassette%2C sub-family B (MDR/TAP)%2C member 1B	protein_coding	mmu02010,mmu04976,mmu05206,mmu05226	ABC transporters|Bile secretion|MicroRNAs in cancer|Gastric cancer	GO:0000086,GO:0000139,GO:0000166,GO:0005524,GO:0005737,GO:0005739,GO:0005886,GO:0006869,GO:0008559,GO:0009410,GO:0009986,GO:0014045,GO:0015562,GO:0016020,GO:0016324,GO:0016887,GO:0031625,GO:0042626,GO:0042910,GO:0045332,GO:0046581,GO:0046943,GO:0047484,GO:0055085,GO:0061843,GO:0070633,GO:0072089,GO:0090554,GO:0090555,GO:0098591,GO:0099038,GO:0099040,GO:0140115,GO:0140326,GO:0140328,GO:0140359,GO:…	G2/M transition of mitotic cell cycle|Golgi membrane|nucleotide binding|ATP binding|cytoplasm|mitochondrion|plasma membrane|lipid transport|ABC-type xenobiotic transporter activity|response to xenobiotic stimulus|cell surface|establishment of endothelial blood-brain barrier|efflux transmembrane transporter activity|membrane|apical plasma membrane|ATP hydrolysis activity|ubiquitin protein ligase b…
Abcb4	10.4818	10.5999	10.3637	0.977051	-0.0334943	0.966136	0.989832	Down	0.0440193	0.107168	0.0725297	0.0437164	0.0886981	0.0730792	18670	ATP-binding cassette%2C sub-family B (MDR/TAP)%2C member 4	protein_coding	mmu02010,mmu04976	ABC transporters|Bile secretion	GO:0000139,GO:0000166,GO:0005524,GO:0005654,GO:0005737,GO:0005829,GO:0005886,GO:0005925,GO:0006855,GO:0006869,GO:0016020,GO:0016324,GO:0016887,GO:0031410,GO:0032376,GO:0032782,GO:0042626,GO:0045332,GO:0046581,GO:0055085,GO:0055088,GO:0061092,GO:0090554,GO:0140326,GO:0140359,GO:1901557,GO:1903413,GO:2001140	Golgi membrane|nucleotide binding|ATP binding|nucleoplasm|cytoplasm|cytosol|plasma membrane|focal adhesion|xenobiotic transmembrane transport|lipid transport|membrane|apical plasma membrane|ATP hydrolysis activity|cytoplasmic vesicle|positive regulation of cholesterol transport|bile acid secretion|ATPase-coupled transmembrane transporter activity|phospholipid translocation|intercellular canalicul…	WP431,WP310	Nuclear receptors in lipid metabolism and toxicity|mRNA processing	R-MMU-382551,R-MMU-382556	Transport of small molecules|ABC-family proteins mediated transport
Abcb5	1.99245	1.13979	2.8451	2.5017	1.32291	0.442145	0.734774	Up	0.0429612	0.0116214	0.00643511	0.00711093	0.00721383	0.00713225	77706	ATP-binding cassette%2C sub-family B (MDR/TAP)%2C member 5	protein_coding	mmu02010	ABC transporters	GO:0000166,GO:0001654,GO:0005524,GO:0005886,GO:0008559,GO:0015562,GO:0016020,GO:0016887,GO:0030154,GO:0042391,GO:0042626,GO:0055085,GO:0140359	nucleotide binding|eye development|ATP binding|plasma membrane|ABC-type xenobiotic transporter activity|efflux transmembrane transporter activity|membrane|ATP hydrolysis activity|cell differentiation|regulation of membrane potential|ATPase-coupled transmembrane transporter activity|transmembrane transport|ABC-type transporter activity			R-MMU-382551,R-MMU-382556	Transport of small molecules|ABC-family proteins mediated transport
Abcb6	241.581	228.659	254.503	1.11322	0.154741	0.465726	0.750767	Up	2.44755	2.46314	2.62913	2.34997	1.98162	1.66085	74104	ATP-binding cassette%2C sub-family B (MDR/TAP)%2C member 6	protein_coding	mmu02010	ABC transporters	GO:0000166,GO:0005524,GO:0005576,GO:0005654,GO:0005739,GO:0005740,GO:0005741,GO:0005764,GO:0005765,GO:0005768,GO:0005774,GO:0005783,GO:0005789,GO:0005794,GO:0005829,GO:0005886,GO:0006778,GO:0006779,GO:0006810,GO:0006878,GO:0007420,GO:0015439,GO:0015562,GO:0015886,GO:0016020,GO:0016887,GO:0020037,GO:0031901,GO:0031902,GO:0032585,GO:0033013,GO:0033162,GO:0035351,GO:0036020,GO:0042168,GO:0043588,GO:…	nucleotide binding|ATP binding|extracellular region|nucleoplasm|mitochondrion|mitochondrial envelope|mitochondrial outer membrane|lysosome|lysosomal membrane|endosome|vacuolar membrane|endoplasmic reticulum|endoplasmic reticulum membrane|Golgi apparatus|cytosol|plasma membrane|porphyrin-containing compound metabolic process|porphyrin-containing compound biosynthetic process|transport|intracellula…			R-MMU-1369007,R-MMU-382551,R-MMU-382556	Mitochondrial ABC transporters|Transport of small molecules|ABC-family proteins mediated transport
Abcb7	592.789	550.131	635.446	1.155	0.207888	0.198664	0.505058	Up	3.3107	2.92266	3.83045	2.75656	2.52271	2.41989	11306	ATP-binding cassette%2C sub-family B (MDR/TAP)%2C member 7	protein_coding	mmu02010	ABC transporters	GO:0000166,GO:0005515,GO:0005524,GO:0005739,GO:0005743,GO:0006879,GO:0016020,GO:0016226,GO:0016887,GO:0034755,GO:0042626,GO:0042803,GO:0055085,GO:0070455,GO:0140359,GO:0140466,GO:0140481,GO:1903331,GO:1903427	nucleotide binding|protein binding|ATP binding|mitochondrion|mitochondrial inner membrane|intracellular iron ion homeostasis|membrane|iron-sulfur cluster assembly|ATP hydrolysis activity|iron ion transmembrane transport|ATPase-coupled transmembrane transporter activity|protein homodimerization activity|transmembrane transport|positive regulation of heme biosynthetic process|ABC-type transporter a…			R-MMU-1369007,R-MMU-382551,R-MMU-382556	Mitochondrial ABC transporters|Transport of small molecules|ABC-family proteins mediated transport
Abcb8	1199.14	1109.92	1288.36	1.16094	0.215289	0.169366	0.464461	Up	7.30561	6.61927	6.39456	5.9157	4.62545	4.93306	74610	ATP-binding cassette%2C sub-family B (MDR/TAP)%2C member 8	protein_coding	mmu02010	ABC transporters	GO:0000166,GO:0005524,GO:0005654,GO:0005730,GO:0005739,GO:0005743,GO:0006811,GO:0006813,GO:0006884,GO:0015440,GO:0016020,GO:0016887,GO:0031966,GO:0055085,GO:0062157,GO:0071805,GO:0140141,GO:0140359	nucleotide binding|ATP binding|nucleoplasm|nucleolus|mitochondrion|mitochondrial inner membrane|monoatomic ion transport|potassium ion transport|cell volume homeostasis|ABC-type peptide transporter activity|membrane|ATP hydrolysis activity|mitochondrial membrane|transmembrane transport|mitochondrial ATP-gated potassium channel complex|potassium ion transmembrane transport|mitochondrial potassium …			R-MMU-1369007,R-MMU-382551,R-MMU-382556	Mitochondrial ABC transporters|Transport of small molecules|ABC-family proteins mediated transport
Abcb9	251.4	279.917	222.884	0.796555	-0.328154	0.179007	0.47867	Down	1.75988	1.15392	1.15123	1.69821	1.50666	1.30037	56325	ATP-binding cassette%2C sub-family B (MDR/TAP)%2C member 9	protein_coding	mmu02010,mmu04142	ABC transporters|Lysosome	GO:0000166,GO:0005524,GO:0005764,GO:0005765,GO:0005789,GO:0006518,GO:0015031,GO:0015421,GO:0015440,GO:0015833,GO:0016020,GO:0016887,GO:0022857,GO:0042626,GO:0042803,GO:0043231,GO:0055085,GO:0140359	nucleotide binding|ATP binding|lysosome|lysosomal membrane|endoplasmic reticulum membrane|peptide metabolic process|protein transport|ABC-type oligopeptide transporter activity|ABC-type peptide transporter activity|peptide transport|membrane|ATP hydrolysis activity|transmembrane transporter activity|ATPase-coupled transmembrane transporter activity|protein homodimerization activity|intracellular …			R-MMU-382551,R-MMU-382556	Transport of small molecules|ABC-family proteins mediated transport
Abcc1	1482.85	1686.59	1279.11	0.758468	-0.398839	0.0963138	0.338872	Down	6.42192	4.36451	3.94269	6.99079	5.89436	4.25411	17250	ATP-binding cassette%2C sub-family C (CFTR/MRP)%2C member 1	protein_coding	mmu02010,mmu04071,mmu04977,mmu05206,mmu01523	ABC transporters|Sphingolipid signaling pathway|Vitamin digestion and absorption|MicroRNAs in cancer|Antifolate resistance	GO:0000166,GO:0005324,GO:0005524,GO:0005886,GO:0006869,GO:0006979,GO:0008559,GO:0009410,GO:0009925,GO:0010001,GO:0015420,GO:0015431,GO:0015562,GO:0015889,GO:0015911,GO:0016020,GO:0016323,GO:0016324,GO:0016328,GO:0016787,GO:0016887,GO:0022857,GO:0030335,GO:0033700,GO:0034040,GO:0034634,GO:0034775,GO:0042887,GO:0042908,GO:0042910,GO:0045332,GO:0046943,GO:0048708,GO:0050729,GO:0055085,GO:0060326,GO:…	nucleotide binding|long-chain fatty acid transporter activity|ATP binding|plasma membrane|lipid transport|response to oxidative stress|ABC-type xenobiotic transporter activity|response to xenobiotic stimulus|basal plasma membrane|glial cell differentiation|ABC-type vitamin B12 transporter activity|ABC-type glutathione S-conjugate transporter activity|efflux transmembrane transporter activity|coba…			R-MMU-1430728,R-MMU-189445,R-MMU-189483,R-MMU-196741,R-MMU-196849,R-MMU-196854,R-MMU-2142691,R-MMU-2142753,R-MMU-2262752,R-MMU-382551,R-MMU-382556,R-MMU-556833,R-MMU-8953897,R-MMU-8978868,R-MMU-9707564,R-MMU-9711123,R-MMU-9748784,R-MMU-9753281,R-MMU-9758890	Metabolism|Metabolism of porphyrins|Heme degradation|Cobalamin (Cbl, vitamin B12) transport and metabolism|Metabolism of water-soluble vitamins and cofactors|Metabolism of vitamins and cofactors|Synthesis of Leukotrienes (LT) and Eoxins (EX)|Arachidonic acid metabolism|Cellular responses to stress|Transport of small molecules|ABC-family proteins mediated transport|Metabolism of lipids|Cellular re…
Abcc10	458.863	537.149	380.577	0.708412	-0.497339	0.0944359	0.33498	Down	1.2958	1.44807	1.92294	1.62853	1.35247	2.84716	224814	ATP-binding cassette%2C sub-family C (CFTR/MRP)%2C member 10	protein_coding	mmu02010	ABC transporters	GO:0000166,GO:0005524,GO:0005886,GO:0006691,GO:0006869,GO:0008559,GO:0009925,GO:0015431,GO:0016020,GO:0016323,GO:0016887,GO:0042626,GO:0055085,GO:0071716,GO:0140359	nucleotide binding|ATP binding|plasma membrane|leukotriene metabolic process|lipid transport|ABC-type xenobiotic transporter activity|basal plasma membrane|ABC-type glutathione S-conjugate transporter activity|membrane|basolateral plasma membrane|ATP hydrolysis activity|ATPase-coupled transmembrane transporter activity|transmembrane transport|leukotriene transport|ABC-type transporter activity			R-MMU-382551,R-MMU-382556	Transport of small molecules|ABC-family proteins mediated transport
Abcc12	373.955	485.923	261.987	0.53926	-0.890947	1.09613e-05	0.000334928	Down	1.95555	1.41137	1.49021	2.76102	2.96427	2.24152	244562	ATP-binding cassette%2C sub-family C (CFTR/MRP)%2C member 12	protein_coding	mmu02010	ABC transporters	GO:0000166,GO:0005524,GO:0005739,GO:0005783,GO:0016020,GO:0016887,GO:0042626,GO:0055085,GO:0140359	nucleotide binding|ATP binding|mitochondrion|endoplasmic reticulum|membrane|ATP hydrolysis activity|ATPase-coupled transmembrane transporter activity|transmembrane transport|ABC-type transporter activity
Abcc2	589.621	846.527	332.714	0.393011	-1.34736	0.113181	0.370899	Down	0.354061	1.87017	3.12625	4.51252	2.40391	5.13242	12780	ATP-binding cassette%2C sub-family C (CFTR/MRP)%2C member 2	protein_coding	mmu02010,mmu04976,mmu01524,mmu01523	ABC transporters|Bile secretion|Platinum drug resistance|Antifolate resistance	GO:0005515,GO:0005886,GO:0006855,GO:0008559,GO:0009410,GO:0009986,GO:0010629,GO:0015127,GO:0015431,GO:0015694,GO:0015711,GO:0015721,GO:0015722,GO:0015723,GO:0015732,GO:0016020,GO:0016324,GO:0016999,GO:0019904,GO:0030644,GO:0031526,GO:0042178,GO:0042626,GO:0042910,GO:0043627,GO:0046581,GO:0046618,GO:0046691,GO:0050787,GO:0055085,GO:0070327,GO:0070633,GO:0071716,GO:1901086,GO:1990961,GO:1990962	protein binding|plasma membrane|xenobiotic transmembrane transport|ABC-type xenobiotic transporter activity|response to xenobiotic stimulus|cell surface|negative regulation of gene expression|bilirubin transmembrane transporter activity|ABC-type glutathione S-conjugate transporter activity|mercury ion transport|organic anion transport|bile acid and bile salt transport|canalicular bile acid transp…	WP4466,WP431	Oxidative stress and redox pathway|Nuclear receptors in lipid metabolism and toxicity	R-MMU-1430728,R-MMU-189445,R-MMU-189483,R-MMU-382551,R-MMU-382556,R-MMU-9748784,R-MMU-9749641,R-MMU-9753281,R-MMU-9754706	Metabolism|Metabolism of porphyrins|Heme degradation|Transport of small molecules|ABC-family proteins mediated transport|Drug ADME|Aspirin ADME|Paracetamol ADME|Atorvastatin ADME
Abcc3	284.144	369.112	199.176	0.539924	-0.889171	0.000556412	0.00826013	Down	1.51429	1.2303	0.868055	2.25234	1.69984	1.96681	76408	ATP-binding cassette%2C sub-family C (CFTR/MRP)%2C member 3	protein_coding	mmu02010,mmu04976,mmu01523	ABC transporters|Bile secretion|Antifolate resistance	GO:0000166,GO:0005524,GO:0005886,GO:0006855,GO:0006869,GO:0008559,GO:0009925,GO:0015164,GO:0015431,GO:0015432,GO:0015721,GO:0015722,GO:0016020,GO:0016323,GO:0016887,GO:0022857,GO:0042626,GO:0042908,GO:0042910,GO:0055085,GO:0071714,GO:0071716,GO:0098656,GO:0140359	nucleotide binding|ATP binding|plasma membrane|xenobiotic transmembrane transport|lipid transport|ABC-type xenobiotic transporter activity|basal plasma membrane|glucuronoside transmembrane transporter activity|ABC-type glutathione S-conjugate transporter activity|ABC-type bile acid transporter activity|bile acid and bile salt transport|canalicular bile acid transport|membrane|basolateral plasma m…	WP431	Nuclear receptors in lipid metabolism and toxicity	R-MMU-1430728,R-MMU-159418,R-MMU-194068,R-MMU-382551,R-MMU-382556,R-MMU-556833,R-MMU-8957322,R-MMU-9748784,R-MMU-9749641,R-MMU-9753281	Metabolism|Recycling of bile acids and salts|Bile acid and bile salt metabolism|Transport of small molecules|ABC-family proteins mediated transport|Metabolism of lipids|Metabolism of steroids|Drug ADME|Aspirin ADME|Paracetamol ADME
Abcc4	518.874	524.546	513.203	0.978259	-0.0317121	0.922822	0.974203	Down	0.896371	1.81231	2.41637	1.66171	1.27792	1.70366	239273	ATP-binding cassette%2C sub-family C (CFTR/MRP)%2C member 4	protein_coding	mmu02010,mmu04024,mmu04976,mmu01523	ABC transporters|cAMP signaling pathway|Bile secretion|Antifolate resistance	GO:0000166,GO:0001409,GO:0005524,GO:0005730,GO:0005794,GO:0005886,GO:0005929,GO:0006855,GO:0006869,GO:0008559,GO:0015132,GO:0015143,GO:0015216,GO:0015431,GO:0015432,GO:0015562,GO:0015665,GO:0015721,GO:0015732,GO:0015747,GO:0015850,GO:0016020,GO:0016323,GO:0016324,GO:0016887,GO:0031088,GO:0032310,GO:0034634,GO:0042626,GO:0042910,GO:0048661,GO:0055085,GO:0060271,GO:0070730,GO:0071716,GO:0098591,GO:…	nucleotide binding|guanine nucleotide transmembrane transporter activity|ATP binding|nucleolus|Golgi apparatus|plasma membrane|cilium|xenobiotic transmembrane transport|lipid transport|ABC-type xenobiotic transporter activity|prostaglandin transmembrane transporter activity|urate transmembrane transporter activity|purine nucleotide transmembrane transporter activity|ABC-type glutathione S-conjuga…	WP3625	Tyrobp causal network in microglia	R-MMU-109582,R-MMU-114608,R-MMU-382551,R-MMU-382556,R-MMU-76002,R-MMU-76005,R-MMU-9748784,R-MMU-9748787,R-MMU-9753281	Hemostasis|Platelet degranulation |Transport of small molecules|ABC-family proteins mediated transport|Platelet activation, signaling and aggregation|Response to elevated platelet cytosolic Ca2+|Drug ADME|Azathioprine ADME|Paracetamol ADME
Abcc5	4407.12	4054.39	4759.86	1.17396	0.231384	0.301801	0.620284	Up	11.7345	10.144	18.0019	8.69982	9.15459	12.154	27416	ATP-binding cassette%2C sub-family C (CFTR/MRP)%2C member 5	protein_coding	mmu02010,mmu01523	ABC transporters|Antifolate resistance	GO:0000166,GO:0005524,GO:0005768,GO:0005794,GO:0005886,GO:0008559,GO:0015216,GO:0015232,GO:0015562,GO:0015865,GO:0016020,GO:0016323,GO:0016324,GO:0016887,GO:0022884,GO:0030213,GO:0034634,GO:0034775,GO:0035351,GO:0042626,GO:0042908,GO:0042910,GO:0048471,GO:0055085,GO:0070730,GO:0070731,GO:0098838,GO:0140115,GO:0140359,GO:1901505	nucleotide binding|ATP binding|endosome|Golgi apparatus|plasma membrane|ABC-type xenobiotic transporter activity|purine nucleotide transmembrane transporter activity|heme transmembrane transporter activity|efflux transmembrane transporter activity|purine nucleotide transport|membrane|basolateral plasma membrane|apical plasma membrane|ATP hydrolysis activity|macromolecule transmembrane transporter…	WP4466,WP5240	Oxidative stress and redox pathway|Lac-Phe pathway	R-MMU-1430728,R-MMU-1630316,R-MMU-2142845,R-MMU-2142850,R-MMU-382551,R-MMU-382556,R-MMU-71387,R-MMU-9748784,R-MMU-9748787,R-MMU-9753281	Metabolism|Glycosaminoglycan metabolism|Hyaluronan metabolism|Hyaluronan biosynthesis and export|Transport of small molecules|ABC-family proteins mediated transport|Metabolism of carbohydrates|Drug ADME|Azathioprine ADME|Paracetamol ADME
Abcc6	175.333	144.898	205.768	1.41999	0.505879	0.66432	0.864135	Up	0.0624778	1.08295	2.27268	0.690482	0.463217	0.977394	27421	ATP-binding cassette%2C sub-family C (CFTR/MRP)%2C member 6	protein_coding	mmu02010	ABC transporters	GO:0000166,GO:0005524,GO:0005576,GO:0005654,GO:0005886,GO:0006855,GO:0008559,GO:0009925,GO:0010467,GO:0015431,GO:0015867,GO:0016020,GO:0016323,GO:0016324,GO:0016328,GO:0016887,GO:0030504,GO:0030505,GO:0030643,GO:0032026,GO:0042626,GO:0046034,GO:0055062,GO:0055074,GO:0055085,GO:0071716,GO:0140359,GO:0140928,GO:1904383	nucleotide binding|ATP binding|extracellular region|nucleoplasm|plasma membrane|xenobiotic transmembrane transport|ABC-type xenobiotic transporter activity|basal plasma membrane|gene expression|ABC-type glutathione S-conjugate transporter activity|ATP transport|membrane|basolateral plasma membrane|apical plasma membrane|lateral plasma membrane|ATP hydrolysis activity|inorganic diphosphate transme…			R-MMU-382551,R-MMU-382556	Transport of small molecules|ABC-family proteins mediated transport
Abcc8	178.054	266.654	89.4547	0.335291	-1.57652	0.000484788	0.00746895	Down	0.204831	0.577062	0.759555	1.14611	0.992402	1.94494	20927	ATP-binding cassette%2C sub-family C (CFTR/MRP)%2C member 8	protein_coding	mmu02010,mmu04911,mmu04930	ABC transporters|Insulin secretion|Type II diabetes mellitus	GO:0001678,GO:0005267,GO:0005524,GO:0005886,GO:0007613,GO:0008270,GO:0008282,GO:0008542,GO:0009268,GO:0010043,GO:0010989,GO:0016020,GO:0016525,GO:0019829,GO:0030672,GO:0032760,GO:0032991,GO:0035774,GO:0042383,GO:0042626,GO:0043268,GO:0043531,GO:0044325,GO:0044877,GO:0046676,GO:0050768,GO:0050905,GO:0055085,GO:0060253,GO:0061535,GO:0061855,GO:0071310,GO:1900721,GO:1903818,GO:1905075,GO:1905604	intracellular glucose homeostasis|potassium channel activity|ATP binding|plasma membrane|memory|zinc ion binding|inward rectifying potassium channel|visual learning|response to pH|response to zinc ion|negative regulation of low-density lipoprotein particle clearance|membrane|negative regulation of angiogenesis|ATPase-coupled monoatomic cation transmembrane transporter activity|synaptic vesicle me…			R-MMU-112316,R-MMU-1296025,R-MMU-1296065,R-MMU-1296071,R-MMU-1430728,R-MMU-163685,R-MMU-422356	Neuronal System|ATP sensitive Potassium channels|Inwardly rectifying K+ channels|Potassium Channels|Metabolism|Integration of energy metabolism|Regulation of insulin secretion
Abcc9	159.178	252.481	65.8749	0.261161	-1.93699	7.24883e-09	5.63181e-07	Down	0.345945	0.228656	0.1711	0.975595	0.951352	0.599249	20928	ATP-binding cassette%2C sub-family C (CFTR/MRP)%2C member 9	protein_coding	mmu02010	ABC transporters	GO:0000166,GO:0001508,GO:0001568,GO:0001669,GO:0001816,GO:0003007,GO:0005261,GO:0005267,GO:0005524,GO:0005886,GO:0006813,GO:0008217,GO:0008281,GO:0008282,GO:0009410,GO:0015459,GO:0016020,GO:0016887,GO:0019829,GO:0019905,GO:0022857,GO:0030017,GO:0030315,GO:0033198,GO:0042626,GO:0042802,GO:0044325,GO:0045776,GO:0048144,GO:0051607,GO:0055085,GO:0060976,GO:0061337,GO:0071805,GO:0072359,GO:0086003,GO:…	nucleotide binding|action potential|blood vessel development|acrosomal vesicle|cytokine production|heart morphogenesis|monoatomic cation channel activity|potassium channel activity|ATP binding|plasma membrane|potassium ion transport|regulation of blood pressure|sulfonylurea receptor activity|inward rectifying potassium channel|response to xenobiotic stimulus|potassium channel regulator activity|m…			R-MMU-112316,R-MMU-1296025,R-MMU-1296065,R-MMU-1296071,R-MMU-382551,R-MMU-382556,R-MMU-397014,R-MMU-5576891,R-MMU-5578775	Neuronal System|ATP sensitive Potassium channels|Inwardly rectifying K+ channels|Potassium Channels|Transport of small molecules|ABC-family proteins mediated transport|Muscle contraction|Cardiac conduction|Ion homeostasis
Abcd1	1835.78	1936.64	1734.91	0.895925	-0.158549	0.264049	0.581542	Down	16.2418	13.9714	13.1069	15.4022	14.2778	13.111	11666	ATP-binding cassette%2C sub-family D (ALD)%2C member 1	protein_coding	mmu02010,mmu04146	ABC transporters|Peroxisome	GO:0000038,GO:0000166,GO:0002082,GO:0005324,GO:0005515,GO:0005524,GO:0005737,GO:0005739,GO:0005764,GO:0005765,GO:0005777,GO:0005778,GO:0005783,GO:0005789,GO:0006635,GO:0007031,GO:0015607,GO:0015910,GO:0016020,GO:0016787,GO:0016887,GO:0019899,GO:0030497,GO:0031966,GO:0031998,GO:0032000,GO:0036113,GO:0042626,GO:0042758,GO:0042760,GO:0042802,GO:0042803,GO:0043217,GO:0043531,GO:0046982,GO:0047617,GO:…	very long-chain fatty acid metabolic process|nucleotide binding|regulation of oxidative phosphorylation|long-chain fatty acid transporter activity|protein binding|ATP binding|cytoplasm|mitochondrion|lysosome|lysosomal membrane|peroxisome|peroxisomal membrane|endoplasmic reticulum|endoplasmic reticulum membrane|fatty acid beta-oxidation|peroxisome organization|ABC-type fatty-acyl-CoA transporter a…			R-MMU-1369062,R-MMU-1430728,R-MMU-2046104,R-MMU-2046105,R-MMU-2046106,R-MMU-382551,R-MMU-382556,R-MMU-390247,R-MMU-390918,R-MMU-556833,R-MMU-8978868,R-MMU-9603798,R-MMU-9609507	ABC transporters in lipid homeostasis|Metabolism|alpha-linolenic (omega3) and linoleic (omega6) acid metabolism|Linoleic acid (LA) metabolism|alpha-linolenic acid (ALA) metabolism|Transport of small molecules|ABC-family proteins mediated transport|Beta-oxidation of very long chain fatty acids|Peroxisomal lipid metabolism|Metabolism of lipids|Fatty acid metabolism|Class I peroxisomal membrane prot…
Abcd2	46.1854	70.643	21.7278	0.307044	-1.70348	3.8885e-05	0.00095266	Down	0.0915841	0.0997165	0.153645	0.297116	0.296033	0.399117	26874	ATP-binding cassette%2C sub-family D (ALD)%2C member 2	protein_coding	mmu02010,mmu04146	ABC transporters|Peroxisome	GO:0000038,GO:0000166,GO:0005324,GO:0005515,GO:0005524,GO:0005739,GO:0005777,GO:0005778,GO:0006629,GO:0006635,GO:0007031,GO:0009617,GO:0015910,GO:0016020,GO:0016787,GO:0016887,GO:0032000,GO:0042626,GO:0042760,GO:0042803,GO:0043217,GO:0046982,GO:0047617,GO:0055085,GO:0140359,GO:1900016,GO:1903427,GO:1990535,GO:2001280	very long-chain fatty acid metabolic process|nucleotide binding|long-chain fatty acid transporter activity|protein binding|ATP binding|mitochondrion|peroxisome|peroxisomal membrane|lipid metabolic process|fatty acid beta-oxidation|peroxisome organization|response to bacterium|long-chain fatty acid import into peroxisome|membrane|hydrolase activity|ATP hydrolysis activity|positive regulation of fa…	WP431	Nuclear receptors in lipid metabolism and toxicity	R-MMU-1369062,R-MMU-382551,R-MMU-382556,R-MMU-9603798,R-MMU-9609507	ABC transporters in lipid homeostasis|Transport of small molecules|ABC-family proteins mediated transport|Class I peroxisomal membrane protein import|Protein localization
Abcd3	2301.1	2228.98	2373.21	1.06471	0.0904668	0.418108	0.718202	Up	11.9114	10.0509	10.83	8.80808	9.68057	8.78354	19299	ATP-binding cassette%2C sub-family D (ALD)%2C member 3	protein_coding	mmu02010,mmu04146	ABC transporters|Peroxisome	GO:0000038,GO:0000166,GO:0005324,GO:0005515,GO:0005524,GO:0005739,GO:0005743,GO:0005777,GO:0005778,GO:0005782,GO:0006633,GO:0006635,GO:0006699,GO:0006869,GO:0007031,GO:0015721,GO:0015910,GO:0016020,GO:0016787,GO:0016887,GO:0042626,GO:0042760,GO:0042803,GO:0043231,GO:0043621,GO:0047617,GO:0055085,GO:0140359,GO:1903512	very long-chain fatty acid metabolic process|nucleotide binding|long-chain fatty acid transporter activity|protein binding|ATP binding|mitochondrion|mitochondrial inner membrane|peroxisome|peroxisomal membrane|peroxisomal matrix|fatty acid biosynthetic process|fatty acid beta-oxidation|bile acid biosynthetic process|lipid transport|peroxisome organization|bile acid and bile salt transport|long-ch…	WP431	Nuclear receptors in lipid metabolism and toxicity	R-MMU-1369062,R-MMU-162582,R-MMU-194315,R-MMU-382551,R-MMU-382556,R-MMU-8980692,R-MMU-9012999,R-MMU-9013106,R-MMU-9603798,R-MMU-9609507,R-MMU-9716542	ABC transporters in lipid homeostasis|Signal Transduction|Signaling by Rho GTPases|Transport of small molecules|ABC-family proteins mediated transport|RHOA GTPase cycle|RHO GTPase cycle|RHOC GTPase cycle|Class I peroxisomal membrane protein import|Protein localization|Signaling by Rho GTPases, Miro GTPases and RHOBTB3
Abcd4	2213.41	2127.39	2299.42	1.08089	0.112224	0.426597	0.72292	Up	19.2268	20.1216	21.0269	17.5648	14.4122	17.4588	19300	ATP-binding cassette%2C sub-family D (ALD)%2C member 4	protein_coding	mmu02010,mmu04146	ABC transporters|Peroxisome	GO:0000166,GO:0005324,GO:0005524,GO:0005764,GO:0005765,GO:0005777,GO:0005778,GO:0005783,GO:0005789,GO:0006635,GO:0007031,GO:0009235,GO:0015420,GO:0015889,GO:0015910,GO:0016020,GO:0016887,GO:0042626,GO:0042760,GO:0042802,GO:0055085,GO:0140359,GO:1990830	nucleotide binding|long-chain fatty acid transporter activity|ATP binding|lysosome|lysosomal membrane|peroxisome|peroxisomal membrane|endoplasmic reticulum|endoplasmic reticulum membrane|fatty acid beta-oxidation|peroxisome organization|cobalamin metabolic process|ABC-type vitamin B12 transporter activity|cobalamin transport|long-chain fatty acid import into peroxisome|membrane|ATP hydrolysis act…			R-MMU-1430728,R-MMU-196741,R-MMU-196849,R-MMU-196854,R-MMU-9758881,R-MMU-9758890	Metabolism|Cobalamin (Cbl, vitamin B12) transport and metabolism|Metabolism of water-soluble vitamins and cofactors|Metabolism of vitamins and cofactors|Uptake of dietary cobalamins into enterocytes|Transport of RCbl within the body
Abce1	3854.97	3616.31	4093.62	1.13202	0.178902	0.199213	0.505655	Up	35.9473	31.5332	30.308	26.7305	27.7253	22.0576	24015	ATP-binding cassette%2C sub-family E (OABP)%2C member 1	protein_coding			GO:0000054,GO:0000166,GO:0003924,GO:0005506,GO:0005524,GO:0005737,GO:0005739,GO:0005829,GO:0006413,GO:0006415,GO:0006417,GO:0016787,GO:0016887,GO:0017111,GO:0022626,GO:0032790,GO:0043024,GO:0043273,GO:0046872,GO:0051536,GO:0051539,GO:0060698,GO:0060702,GO:0072344	ribosomal subunit export from nucleus|nucleotide binding|GTPase activity|iron ion binding|ATP binding|cytoplasm|mitochondrion|cytosol|translational initiation|translational termination|regulation of translation|hydrolase activity|ATP hydrolysis activity|ribonucleoside triphosphate phosphatase activity|cytosolic ribosome|ribosome disassembly|ribosomal small subunit binding|CTPase activity|metal io…			R-MMU-1169410,R-MMU-1280215,R-MMU-168256,R-MMU-8983711,R-MMU-909733,R-MMU-913531	Antiviral mechanism by IFN-stimulated genes|Cytokine Signaling in Immune system|Immune System|OAS antiviral response|Interferon alpha/beta signaling|Interferon Signaling
Abcf1	5825.86	6759.4	4892.32	0.723809	-0.46632	0.000179329	0.00333085	Down	52.8138	46.2485	42.3771	59.2188	57.2987	56.5149	224742	ATP-binding cassette%2C sub-family F (GCN20)%2C member 1	protein_coding			GO:0000166,GO:0005524,GO:0005634,GO:0005635,GO:0005654,GO:0005737,GO:0005829,GO:0005840,GO:0006413,GO:0008494,GO:0016887,GO:0042788,GO:0043022,GO:0045727	nucleotide binding|ATP binding|nucleus|nuclear envelope|nucleoplasm|cytoplasm|cytosol|ribosome|translational initiation|translation activator activity|ATP hydrolysis activity|polysomal ribosome|ribosome binding|positive regulation of translation			R-MMU-382551,R-MMU-382556	Transport of small molecules|ABC-family proteins mediated transport
Abcf2	1829.39	1778.98	1879.81	1.05678	0.079672	0.505974	0.777655	Up	19.4499	19.2069	17.4364	16.0696	15.481	15.4964	27407	ATP-binding cassette%2C sub-family F (GCN20)%2C member 2	protein_coding			GO:0000166,GO:0005515,GO:0005524,GO:0005739,GO:0008150,GO:0016887	nucleotide binding|protein binding|ATP binding|mitochondrion|biological_process|ATP hydrolysis activity
Abcf3	1217.03	1095.26	1338.8	1.22252	0.289861	0.033712	0.176295	Up	12.6933	12.9492	11.3887	9.45247	8.57393	8.82088	27406	ATP-binding cassette%2C sub-family F (GCN20)%2C member 3	protein_coding			GO:0000166,GO:0005515,GO:0005524,GO:0016887,GO:0051607	nucleotide binding|protein binding|ATP binding|ATP hydrolysis activity|defense response to virus
Abcg1	2409.66	3454.95	1364.37	0.394934	-1.34031	9.01967e-20	4.73936e-17	Down	7.54932	7.05772	6.73137	18.2267	15.2353	14.3384	11307	ATP binding cassette subfamily G member 1	protein_coding	mmu02010,mmu05417	ABC transporters|Lipid and atherosclerosis	GO:0000166,GO:0005524,GO:0005739,GO:0005768,GO:0005783,GO:0005794,GO:0005886,GO:0006869,GO:0008203,GO:0009897,GO:0010745,GO:0010875,GO:0010888,GO:0016020,GO:0016887,GO:0019534,GO:0030301,GO:0032367,GO:0033344,GO:0033700,GO:0033993,GO:0034041,GO:0034374,GO:0034375,GO:0034436,GO:0035774,GO:0042632,GO:0042803,GO:0042987,GO:0043531,GO:0043691,GO:0045542,GO:0046982,GO:0050714,GO:0055037,GO:0055085,GO:…	nucleotide binding|ATP binding|mitochondrion|endosome|endoplasmic reticulum|Golgi apparatus|plasma membrane|lipid transport|cholesterol metabolic process|external side of plasma membrane|negative regulation of macrophage derived foam cell differentiation|positive regulation of cholesterol efflux|negative regulation of lipid storage|membrane|ATP hydrolysis activity|toxin transmembrane transporter …	WP431,WP4346	Nuclear receptors in lipid metabolism and toxicity|Cholesterol metabolism with Bloch and Kandutsch-Russell pathways	R-MMU-1369062,R-MMU-174824,R-MMU-382551,R-MMU-382556,R-MMU-8963899,R-MMU-8964058	ABC transporters in lipid homeostasis|Plasma lipoprotein assembly, remodeling, and clearance|Transport of small molecules|ABC-family proteins mediated transport|Plasma lipoprotein remodeling|HDL remodeling
Abcg2	2163.29	1874.09	2452.48	1.30857	0.387994	0.0287129	0.158565	Up	16.3307	20.0254	23.9665	13.5753	12.3595	14.9049	26357	ATP binding cassette subfamily G member 2 (Junior blood group)	protein_coding	mmu02010,mmu04976,mmu01523	ABC transporters|Bile secretion|Antifolate resistance	GO:0000166,GO:0005524,GO:0005654,GO:0005739,GO:0005886,GO:0006869,GO:0008092,GO:0008514,GO:0008559,GO:0015143,GO:0015225,GO:0015562,GO:0015711,GO:0015747,GO:0015878,GO:0016020,GO:0016324,GO:0019389,GO:0031526,GO:0032217,GO:0032218,GO:0042626,GO:0042802,GO:0042803,GO:0042887,GO:0042910,GO:0045121,GO:0046415,GO:0055085,GO:0060136,GO:0065003,GO:0070633,GO:0097744,GO:0098591,GO:0140115,GO:0140359,GO:…	nucleotide binding|ATP binding|nucleoplasm|mitochondrion|plasma membrane|lipid transport|cytoskeletal protein binding|organic anion transmembrane transporter activity|ABC-type xenobiotic transporter activity|urate transmembrane transporter activity|biotin transmembrane transporter activity|efflux transmembrane transporter activity|organic anion transport|urate transport|biotin transport|membrane|…			R-MMU-1430728,R-MMU-189445,R-MMU-189451,R-MMU-189483,R-MMU-382551,R-MMU-917937,R-MMU-9748784,R-MMU-9753281,R-MMU-9793528	Metabolism|Metabolism of porphyrins|Heme biosynthesis|Heme degradation|Transport of small molecules|Iron uptake and transport|Drug ADME|Paracetamol ADME|Ciprofloxacin ADME
Abcg3	16.3484	15.9693	16.7276	1.04561	0.0643505	0.939387	0.980292	Up	0.0276607	0.0982072	0.275527	0.120183	0.105666	0.112507	27405	ATP binding cassette subfamily G member 3	protein_coding	mmu02010	ABC transporters	GO:0005524,GO:0005654,GO:0005886,GO:0008559,GO:0015143,GO:0015562,GO:0016020,GO:0031526,GO:0032217,GO:0032218,GO:0042626,GO:0042802,GO:0042803,GO:0045121,GO:0046415,GO:0055085,GO:0070633,GO:0097744,GO:0140359,GO:1990748,GO:1990962	ATP binding|nucleoplasm|plasma membrane|ABC-type xenobiotic transporter activity|urate transmembrane transporter activity|efflux transmembrane transporter activity|membrane|brush border membrane|riboflavin transmembrane transporter activity|riboflavin transport|ATPase-coupled transmembrane transporter activity|identical protein binding|protein homodimerization activity|membrane raft|urate metabol…
Abcg4	15.066	12.8833	17.2487	1.33838	0.420493	0.499515	0.773464	Up	0.0968989	0.105503	0.0863607	0.0449084	0.0740322	0.0731949	192663	ATP binding cassette subfamily G member 4	protein_coding	mmu02010	ABC transporters	GO:0000166,GO:0005524,GO:0005768,GO:0005886,GO:0006355,GO:0010008,GO:0010875,GO:0015918,GO:0016020,GO:0016887,GO:0031410,GO:0033344,GO:0034041,GO:0042632,GO:0042802,GO:0042803,GO:0045542,GO:0046982,GO:0055085,GO:0071403,GO:0140359,GO:1990830	nucleotide binding|ATP binding|endosome|plasma membrane|regulation of DNA-templated transcription|endosome membrane|positive regulation of cholesterol efflux|sterol transport|membrane|ATP hydrolysis activity|cytoplasmic vesicle|cholesterol efflux|ABC-type sterol transporter activity|cholesterol homeostasis|identical protein binding|protein homodimerization activity|positive regulation of choleste…			R-MMU-1369062,R-MMU-382551,R-MMU-382556	ABC transporters in lipid homeostasis|Transport of small molecules|ABC-family proteins mediated transport
Abcg5	6.21258	1.14821	11.277	9.85598	3.301	0.0233167	0.137335	Up	0.0218153	0.227198	0.171554	0.0252761	0.0128209	0	27409	ATP binding cassette subfamily G member 5	protein_coding	mmu02010,mmu04976,mmu04975,mmu04979	ABC transporters|Bile secretion|Fat digestion and absorption|Cholesterol metabolism	GO:0000166,GO:0005515,GO:0005524,GO:0005886,GO:0006869,GO:0010949,GO:0015918,GO:0016020,GO:0016324,GO:0016887,GO:0030299,GO:0033344,GO:0042626,GO:0042632,GO:0043190,GO:0043235,GO:0045177,GO:0045796,GO:0046872,GO:0046982,GO:0055085,GO:0120020,GO:0140359	nucleotide binding|protein binding|ATP binding|plasma membrane|lipid transport|negative regulation of intestinal phytosterol absorption|sterol transport|membrane|apical plasma membrane|ATP hydrolysis activity|intestinal cholesterol absorption|cholesterol efflux|ATPase-coupled transmembrane transporter activity|cholesterol homeostasis|ATP-binding cassette (ABC) transporter complex|receptor complex…	WP1259,WP431	Retinol metabolism|Nuclear receptors in lipid metabolism and toxicity	R-MMU-1369062,R-MMU-382551,R-MMU-382556	ABC transporters in lipid homeostasis|Transport of small molecules|ABC-family proteins mediated transport
Abcg8	1.95942	0.756772	3.16207	4.17388	2.06139	0.400247	0.704753	Up	0	0.0531316	0.0220655	0	0	0.0163039	67470	ATP binding cassette subfamily G member 8	protein_coding	mmu02010,mmu04976,mmu04975,mmu04979	ABC transporters|Bile secretion|Fat digestion and absorption|Cholesterol metabolism	GO:0005515,GO:0005524,GO:0005886,GO:0006869,GO:0010949,GO:0015914,GO:0015918,GO:0016020,GO:0016324,GO:0016887,GO:0030299,GO:0033344,GO:0042626,GO:0042632,GO:0043190,GO:0043235,GO:0045796,GO:0046872,GO:0046982,GO:0055085,GO:0055092,GO:0120020,GO:0140359	protein binding|ATP binding|plasma membrane|lipid transport|negative regulation of intestinal phytosterol absorption|phospholipid transport|sterol transport|membrane|apical plasma membrane|ATP hydrolysis activity|intestinal cholesterol absorption|cholesterol efflux|ATPase-coupled transmembrane transporter activity|cholesterol homeostasis|ATP-binding cassette (ABC) transporter complex|receptor com…	WP1259	Retinol metabolism	R-MMU-1369062,R-MMU-382551,R-MMU-382556	ABC transporters in lipid homeostasis|Transport of small molecules|ABC-family proteins mediated transport
Abhd10	294.323	278.255	310.39	1.11521	0.157311	0.487313	0.765658	Up	1.16097	1.44082	1.608	1.08157	1.34617	0.925284	213012	abhydrolase domain containing 10	protein_coding			GO:0002084,GO:0004553,GO:0005739,GO:0005829,GO:0008474,GO:0016787,GO:0019391,GO:0102390	protein depalmitoylation|hydrolase activity, hydrolyzing O-glycosyl compounds|mitochondrion|cytosol|palmitoyl-(protein) hydrolase activity|hydrolase activity|glucuronoside catabolic process|mycophenolic acid acyl-glucuronide esterase activity			R-MMU-1430728,R-MMU-156580,R-MMU-156588,R-MMU-211859	Metabolism|Phase II - Conjugation of compounds|Glucuronidation|Biological oxidations
Abhd11	559.897	569.151	550.643	0.967455	-0.047734	0.770767	0.91286	Down	10.357	10.2669	10.3149	8.33232	8.96809	11.055	68758	abhydrolase domain containing 11	protein_coding			GO:0003824,GO:0005739,GO:0016787,GO:0044255,GO:0052689	catalytic activity|mitochondrion|hydrolase activity|cellular lipid metabolic process|carboxylic ester hydrolase activity
Abhd11os	60.6715	54.073	67.27	1.2442	0.315223	0.518424	0.785683	Up	2.62984	4.92996	4.63251	3.10797	1.42192	4.15639	69812	abhydrolase domain containing 11%2C opposite strand	non_coding			GO:0003674,GO:0005575,GO:0008150	molecular_function|cellular_component|biological_process
Abhd12	2374.29	2459.01	2289.57	0.931119	-0.102963	0.477198	0.759402	Down	25.3351	31.1108	28.2029	27.7048	25.1744	27.7879	76192	abhydrolase domain containing 12	protein_coding			GO:0002084,GO:0004620,GO:0004622,GO:0005737,GO:0005739,GO:0005783,GO:0005789,GO:0006629,GO:0006660,GO:0007628,GO:0008474,GO:0009395,GO:0010996,GO:0016020,GO:0016787,GO:0032281,GO:0032839,GO:0046464,GO:0046475,GO:0047372,GO:0050727,GO:0052651	protein depalmitoylation|phospholipase activity|lysophospholipase activity|cytoplasm|mitochondrion|endoplasmic reticulum|endoplasmic reticulum membrane|lipid metabolic process|phosphatidylserine catabolic process|adult walking behavior|palmitoyl-(protein) hydrolase activity|phospholipid catabolic process|response to auditory stimulus|membrane|hydrolase activity|AMPA glutamate receptor complex|den…			R-MMU-109582,R-MMU-114508,R-MMU-162582,R-MMU-372790,R-MMU-388396,R-MMU-416476,R-MMU-426048,R-MMU-76002	Hemostasis|Effects of PIP2 hydrolysis|Signal Transduction|Signaling by GPCR|GPCR downstream signalling|G alpha (q) signalling events|Arachidonate production from DAG|Platelet activation, signaling and aggregation
Abhd12b	119.391	186.819	51.9633	0.278355	-1.845	1.64114e-09	1.52412e-07	Down	0.612593	0.51464	0.425197	1.67947	2.03844	1.2333	100504285	abhydrolase domain containing 12B	protein_coding			GO:0004622,GO:0005789,GO:0006660,GO:0047372,GO:0052651	lysophospholipase activity|endoplasmic reticulum membrane|phosphatidylserine catabolic process|acylglycerol lipase activity|monoacylglycerol catabolic process
Abhd13	1450.03	1472.13	1427.94	0.970053	-0.0438639	0.716087	0.887695	Down	9.0453	7.95358	8.11108	7.87488	7.89338	7.14935	68904	abhydrolase domain containing 13	protein_coding			GO:0002084,GO:0005737,GO:0008474,GO:0016020,GO:0016787,GO:0032839	protein depalmitoylation|cytoplasm|palmitoyl-(protein) hydrolase activity|membrane|hydrolase activity|dendrite cytoplasm
Abhd14a	307.031	345.246	268.816	0.778474	-0.361279	0.0490937	0.222987	Down	4.13048	4.68435	5.00079	4.88902	5.06456	5.78428	68644	abhydrolase domain containing 14A	protein_coding			GO:0005737,GO:0016020,GO:0016787	cytoplasm|membrane|hydrolase activity
Abhd14b	720.349	665.149	775.549	1.16595	0.221505	0.781049	0.916666	Up	2.80955	13.5517	17.4364	6.92107	5.41468	13.4572	76491	abhydrolase domain containing 14b	protein_coding			GO:0005634,GO:0005654,GO:0005730,GO:0005737,GO:0005829,GO:0016740,GO:0016746,GO:0016787,GO:0045944	nucleus|nucleoplasm|nucleolus|cytoplasm|cytosol|transferase activity|acyltransferase activity|hydrolase activity|positive regulation of transcription by RNA polymerase II
Abhd15	183.94	169.528	198.353	1.17064	0.227303	0.456097	0.744535	Up	1.99929	2.04616	1.50221	1.87567	1.351	0.968869	67477	abhydrolase domain containing 15	protein_coding			GO:0005515,GO:0005576,GO:0016042,GO:0034338,GO:0044255,GO:0047372,GO:0060612	protein binding|extracellular region|lipid catabolic process|short-chain carboxylesterase activity|cellular lipid metabolic process|acylglycerol lipase activity|adipose tissue development
Abhd16a	2388.4	2297.8	2479	1.07889	0.109546	0.445412	0.736892	Up	36.2197	35.4476	33.0126	26.6244	26.1778	33.1995	193742	abhydrolase domain containing 16A	protein_coding	mmu00561	Glycerolipid metabolism	GO:0004620,GO:0006629,GO:0006660,GO:0016020,GO:0016787,GO:0047372,GO:0052651,GO:1905344	phospholipase activity|lipid metabolic process|phosphatidylserine catabolic process|membrane|hydrolase activity|acylglycerol lipase activity|monoacylglycerol catabolic process|prostaglandin catabolic process
Abhd17a	2428.14	2481.58	2374.71	0.956955	-0.0634774	0.542203	0.800101	Down	15.6901	15.5563	15.5793	14.0932	14.1766	15.0955	216169	abhydrolase domain containing 17A	protein_coding			GO:0002084,GO:0005768,GO:0005886,GO:0008474,GO:0010008,GO:0014069,GO:0016020,GO:0016607,GO:0016787,GO:0042995,GO:0043231,GO:0045202,GO:0045211,GO:0055038,GO:0072657,GO:0098839,GO:0098944,GO:0098978,GO:0099175,GO:1902817,GO:1905668	protein depalmitoylation|endosome|plasma membrane|palmitoyl-(protein) hydrolase activity|endosome membrane|postsynaptic density|membrane|nuclear speck|hydrolase activity|cell projection|intracellular membrane-bounded organelle|synapse|postsynaptic membrane|recycling endosome membrane|protein localization to membrane|postsynaptic density membrane|postsynaptic recycling endosome membrane|glutamater…			R-MMU-162582,R-MMU-5673001,R-MMU-5683057,R-MMU-5684996,R-MMU-9648002	Signal Transduction|RAF/MAP kinase cascade|MAPK family signaling cascades|MAPK1/MAPK3 signaling|RAS processing
Abhd17b	718.208	791.605	644.81	0.814497	-0.296018	0.0220652	0.131909	Down	7.39671	6.44354	7.46579	7.42155	7.71942	8.00874	226016	abhydrolase domain containing 17B	protein_coding			GO:0002084,GO:0005768,GO:0005886,GO:0006508,GO:0008236,GO:0008474,GO:0010008,GO:0014069,GO:0016020,GO:0016787,GO:0042995,GO:0045202,GO:0045211,GO:0055038,GO:0098839,GO:0098944,GO:0098978,GO:0099175,GO:1902473,GO:1902817,GO:1902950,GO:1905668	protein depalmitoylation|endosome|plasma membrane|proteolysis|serine-type peptidase activity|palmitoyl-(protein) hydrolase activity|endosome membrane|postsynaptic density|membrane|hydrolase activity|cell projection|synapse|postsynaptic membrane|recycling endosome membrane|postsynaptic density membrane|postsynaptic recycling endosome membrane|glutamatergic synapse|regulation of postsynapse organiz…			R-MMU-162582,R-MMU-5673001,R-MMU-5683057,R-MMU-5684996,R-MMU-9648002	Signal Transduction|RAF/MAP kinase cascade|MAPK family signaling cascades|MAPK1/MAPK3 signaling|RAS processing
Abhd17c	1894.42	2303.73	1485.11	0.644627	-0.633464	0.0307305	0.165351	Down	11.8213	23.0742	25.2951	24.6567	22.0716	36.2562	70178	abhydrolase domain containing 17C	protein_coding			GO:0002084,GO:0005768,GO:0005886,GO:0008474,GO:0010008,GO:0014069,GO:0016020,GO:0016787,GO:0042995,GO:0045202,GO:0045211,GO:0098978,GO:0099175,GO:1902817,GO:1905668	protein depalmitoylation|endosome|plasma membrane|palmitoyl-(protein) hydrolase activity|endosome membrane|postsynaptic density|membrane|hydrolase activity|cell projection|synapse|postsynaptic membrane|glutamatergic synapse|regulation of postsynapse organization|negative regulation of protein localization to microtubule|positive regulation of protein localization to endosome			R-MMU-162582,R-MMU-5673001,R-MMU-5683057,R-MMU-5684996,R-MMU-9648002	Signal Transduction|RAF/MAP kinase cascade|MAPK family signaling cascades|MAPK1/MAPK3 signaling|RAS processing
Abhd18	523.509	586.49	460.528	0.785185	-0.348896	0.0174148	0.112068	Down	2.83459	2.79838	3.14527	3.37992	3.11183	3.40285	269423	abhydrolase domain containing 18	protein_coding			GO:0003674,GO:0005575,GO:0005576,GO:0008150	molecular_function|cellular_component|extracellular region|biological_process
Abhd2	12434	14155	10713	0.756849	-0.401923	0.0142331	0.0979638	Down	52.3702	45.9557	41.7001	64.3739	49.4172	49.7269	54608	abhydrolase domain containing 2	protein_coding			GO:0001669,GO:0003707,GO:0005886,GO:0006629,GO:0007340,GO:0008126,GO:0009611,GO:0014909,GO:0014912,GO:0016020,GO:0016042,GO:0016787,GO:0031410,GO:0032570,GO:0033878,GO:0036126,GO:0042562,GO:0043401,GO:0046464,GO:0047372,GO:0048240,GO:0051792,GO:0051793,GO:0052689,GO:0097524	acrosomal vesicle|nuclear steroid receptor activity|plasma membrane|lipid metabolic process|acrosome reaction|acetylesterase activity|response to wounding|smooth muscle cell migration|negative regulation of smooth muscle cell migration|membrane|lipid catabolic process|hydrolase activity|cytoplasmic vesicle|response to progesterone|hormone-sensitive lipase activity|sperm flagellum|hormone binding|…
Abhd3	822.845	742.202	903.488	1.21749	0.283914	0.0956865	0.337356	Up	7.25495	6.5672	6.95277	5.98332	4.53293	4.5588	106861	abhydrolase domain containing 3	protein_coding			GO:0004623,GO:0005575,GO:0006629,GO:0008126,GO:0008970,GO:0016020,GO:0016787,GO:0046470,GO:0047372,GO:0051792,GO:0051793,GO:0052689,GO:0052739,GO:0052740	phospholipase A2 activity|cellular_component|lipid metabolic process|acetylesterase activity|phospholipase A1 activity|membrane|hydrolase activity|phosphatidylcholine metabolic process|acylglycerol lipase activity|medium-chain fatty acid biosynthetic process|medium-chain fatty acid catabolic process|carboxylic ester hydrolase activity|phosphatidylserine 1-acylhydrolase activity|1-acyl-2-lysophosp…			R-MMU-1430728,R-MMU-1483191,R-MMU-1483206,R-MMU-1483257,R-MMU-556833	Metabolism|Synthesis of PC|Glycerophospholipid biosynthesis|Phospholipid metabolism|Metabolism of lipids
Abhd4	2259.89	2642.6	1877.17	0.710337	-0.493425	1.55597e-05	0.000449609	Down	19.0155	20.1407	21.1849	25.304	24.4691	25.4987	105501	abhydrolase domain containing 4	protein_coding			GO:0004622,GO:0005739,GO:0005811,GO:0006629,GO:0006654,GO:0016042,GO:0016787,GO:0042171,GO:0055088,GO:0070291,GO:0070292	lysophospholipase activity|mitochondrion|lipid droplet|lipid metabolic process|phosphatidic acid biosynthetic process|lipid catabolic process|hydrolase activity|lysophosphatidic acid acyltransferase activity|lipid homeostasis|N-acylethanolamine metabolic process|N-acylphosphatidylethanolamine metabolic process			R-MMU-1430728,R-MMU-1482839,R-MMU-1483206,R-MMU-1483257,R-MMU-556833	Metabolism|Acyl chain remodelling of PE|Glycerophospholipid biosynthesis|Phospholipid metabolism|Metabolism of lipids
Abhd5	3151.67	3457.35	2845.99	0.823214	-0.280661	0.0265703	0.150206	Down	25.2546	23.2406	20.5082	23.5061	24.9579	25.8561	67469	abhydrolase domain containing 5	protein_coding	mmu04923	Regulation of lipolysis in adipocytes	GO:0003841,GO:0004806,GO:0005515,GO:0005654,GO:0005737,GO:0005739,GO:0005811,GO:0005829,GO:0006629,GO:0006631,GO:0006654,GO:0008654,GO:0010891,GO:0010898,GO:0016740,GO:0016746,GO:0030154,GO:0042171,GO:0043231,GO:0050996,GO:0052689,GO:0055088,GO:0060229	1-acylglycerol-3-phosphate O-acyltransferase activity|triglyceride lipase activity|protein binding|nucleoplasm|cytoplasm|mitochondrion|lipid droplet|cytosol|lipid metabolic process|fatty acid metabolic process|phosphatidic acid biosynthetic process|phospholipid biosynthetic process|negative regulation of sequestering of triglyceride|positive regulation of triglyceride catabolic process|transferas…
Abhd6	4016.93	4463.12	3570.74	0.800086	-0.321774	0.0558853	0.241738	Down	9.40559	6.98732	6.46818	8.72628	9.02185	7.53153	66082	abhydrolase domain containing 6	protein_coding	mmu04723	Retrograde endocannabinoid signaling	GO:0003824,GO:0004620,GO:0005739,GO:0005764,GO:0005765,GO:0005768,GO:0006629,GO:0009395,GO:0016020,GO:0016787,GO:0030336,GO:0031902,GO:0032281,GO:0045211,GO:0046464,GO:0046889,GO:0047372,GO:0052651,GO:0060292,GO:0098978,GO:0098982,GO:0099178,GO:0120163,GO:2000124,GO:2001311	catalytic activity|phospholipase activity|mitochondrion|lysosome|lysosomal membrane|endosome|lipid metabolic process|phospholipid catabolic process|membrane|hydrolase activity|negative regulation of cell migration|late endosome membrane|AMPA glutamate receptor complex|postsynaptic membrane|acylglycerol catabolic process|positive regulation of lipid biosynthetic process|acylglycerol lipase activit…			R-MMU-109582,R-MMU-114508,R-MMU-162582,R-MMU-372790,R-MMU-388396,R-MMU-416476,R-MMU-426048,R-MMU-76002	Hemostasis|Effects of PIP2 hydrolysis|Signal Transduction|Signaling by GPCR|GPCR downstream signalling|G alpha (q) signalling events|Arachidonate production from DAG|Platelet activation, signaling and aggregation
Abhd8	347.007	373.132	320.883	0.860082	-0.217453	0.265341	0.583047	Down	3.31431	4.44378	3.63702	3.95935	3.95616	3.86357	64296	abhydrolase domain containing 8	protein_coding			GO:0003824,GO:0016787	catalytic activity|hydrolase activity
Abi1	3800.88	4083.75	3518.02	0.861466	-0.215134	0.0367202	0.186184	Down	28.7143	27.5629	30.3014	30.3798	28.8399	29.7442	11308	abl interactor 1	protein_coding	mmu05132	Salmonella infection	GO:0001756,GO:0005515,GO:0005622,GO:0005634,GO:0005737,GO:0005856,GO:0014069,GO:0017124,GO:0030027,GO:0030296,GO:0031209,GO:0031252,GO:0032433,GO:0035591,GO:0035855,GO:0042995,GO:0043005,GO:0045202,GO:0048813,GO:0061098,GO:0072673,GO:0098978,GO:0099527	somitogenesis|protein binding|intracellular anatomical structure|nucleus|cytoplasm|cytoskeleton|postsynaptic density|SH3 domain binding|lamellipodium|protein tyrosine kinase activator activity|SCAR complex|cell leading edge|filopodium tip|signaling adaptor activity|megakaryocyte development|cell projection|neuron projection|synapse|dendrite morphogenesis|positive regulation of protein tyrosine ki…	WP572,WP88	EGFR1 signaling pathway|Toll-like receptor signaling	R-MMU-162582,R-MMU-168249,R-MMU-168256,R-MMU-194138,R-MMU-194315,R-MMU-195258,R-MMU-2029480,R-MMU-2029482,R-MMU-4420097,R-MMU-5663213,R-MMU-9006934,R-MMU-9012999,R-MMU-9013149,R-MMU-9013404,R-MMU-9013423,R-MMU-9716542	Signal Transduction|Innate Immune System|Immune System|Signaling by VEGF|Signaling by Rho GTPases|RHO GTPase Effectors|Fcgamma receptor (FCGR) dependent phagocytosis|Regulation of actin dynamics for phagocytic cup formation|VEGFA-VEGFR2 Pathway|RHO GTPases Activate WASPs and WAVEs|Signaling by Receptor Tyrosine Kinases|RHO GTPase cycle|RAC1 GTPase cycle|RAC2 GTPase cycle|RAC3 GTPase cycle|Signali…
Abi2	1255.05	1048.31	1461.79	1.39448	0.479732	0.000101236	0.00209037	Up	4.09698	4.06986	4.27773	2.78376	2.67663	2.44345	329165	abl interactor 2	protein_coding	mmu04810	Regulation of actin cytoskeleton	GO:0001764,GO:0005737,GO:0005829,GO:0005856,GO:0005884,GO:0005912,GO:0007399,GO:0007611,GO:0010592,GO:0016358,GO:0016477,GO:0016601,GO:0017124,GO:0030027,GO:0030425,GO:0031209,GO:0031267,GO:0031625,GO:0032433,GO:0035591,GO:0042802,GO:0042995,GO:0043010,GO:0043197,GO:0045186,GO:0045202,GO:0061001,GO:0061098,GO:0070064,GO:0070161,GO:0070309,GO:0098871,GO:0098974,GO:0098978,GO:0099173,GO:2000601	neuron migration|cytoplasm|cytosol|cytoskeleton|actin filament|adherens junction|nervous system development|learning or memory|positive regulation of lamellipodium assembly|dendrite development|cell migration|Rac protein signal transduction|SH3 domain binding|lamellipodium|dendrite|SCAR complex|small GTPase binding|ubiquitin protein ligase binding|filopodium tip|signaling adaptor activity|identic…	WP523	Regulation of actin cytoskeleton	R-MMU-162582,R-MMU-168249,R-MMU-168256,R-MMU-194138,R-MMU-194315,R-MMU-195258,R-MMU-2029480,R-MMU-2029482,R-MMU-4420097,R-MMU-5663213,R-MMU-9006934,R-MMU-9012999,R-MMU-9013149,R-MMU-9013404,R-MMU-9013423,R-MMU-9716542	Signal Transduction|Innate Immune System|Immune System|Signaling by VEGF|Signaling by Rho GTPases|RHO GTPase Effectors|Fcgamma receptor (FCGR) dependent phagocytosis|Regulation of actin dynamics for phagocytic cup formation|VEGFA-VEGFR2 Pathway|RHO GTPases Activate WASPs and WAVEs|Signaling by Receptor Tyrosine Kinases|RHO GTPase cycle|RAC1 GTPase cycle|RAC2 GTPase cycle|RAC3 GTPase cycle|Signali…
Abi3	279.704	282.358	277.05	0.981209	-0.0273676	0.914509	0.970905	Down	1.12003	0.83821	0.897136	0.839896	1.12094	0.618001	66610	ABI family member 3	protein_coding			GO:0002357,GO:0005515,GO:0005622,GO:0005737,GO:0010593,GO:0017124,GO:0018108,GO:0030027,GO:0030334,GO:0031209,GO:0042802,GO:0061098,GO:1903077,GO:2000774	defense response to tumor cell|protein binding|intracellular anatomical structure|cytoplasm|negative regulation of lamellipodium assembly|SH3 domain binding|peptidyl-tyrosine phosphorylation|lamellipodium|regulation of cell migration|SCAR complex|identical protein binding|positive regulation of protein tyrosine kinase activity|negative regulation of protein localization to plasma membrane|positiv…
Abi3bp	188.385	214.319	162.451	0.757884	-0.399951	0.670585	0.866696	Down	0.100487	0.903825	1.33899	0.591845	1.13684	1.0364	320712	ABI family member 3 binding protein	protein_coding			GO:0005201,GO:0005518,GO:0005539,GO:0005614,GO:0008201,GO:0008285,GO:0010811,GO:0014069,GO:0030027,GO:0030036,GO:0030198,GO:0031012,GO:0043197,GO:0043198,GO:0051015,GO:0061001,GO:0062023,GO:0099151,GO:1904597,GO:1905209	extracellular matrix structural constituent|collagen binding|glycosaminoglycan binding|interstitial matrix|heparin binding|negative regulation of cell population proliferation|positive regulation of cell-substrate adhesion|postsynaptic density|lamellipodium|actin cytoskeleton organization|extracellular matrix organization|extracellular matrix|dendritic spine|dendritic shaft|actin filament binding…
Abitram	511.485	443.165	579.805	1.3086	0.388025	0.0270855	0.152336	Up	4.20909	3.73936	3.37803	2.73913	2.73234	2.19656	230234	actin binding transcription modulator	protein_coding			GO:0003779,GO:0003785,GO:0005634,GO:0016607,GO:0030027,GO:0030425,GO:0030426,GO:0030833,GO:0032433,GO:0042995,GO:0048813,GO:0051015,GO:0051489	actin binding|actin monomer binding|nucleus|nuclear speck|lamellipodium|dendrite|growth cone|regulation of actin filament polymerization|filopodium tip|cell projection|dendrite morphogenesis|actin filament binding|regulation of filopodium assembly
Abl1	3045.93	2998.38	3093.48	1.03173	0.0450585	0.743873	0.899341	Up	11.7896	9.81956	10.6102	9.30854	10.3614	7.98173	11350	c-abl oncogene 1%2C non-receptor tyrosine kinase	protein_coding	mmu04012,mmu04014,mmu04110,mmu04722,mmu04360,mmu05200,mmu05206,mmu05208,mmu05220,mmu05416	ErbB signaling pathway|Ras signaling pathway|Cell cycle|Neurotrophin signaling pathway|Axon guidance|Pathways in cancer|MicroRNAs in cancer|Chemical carcinogenesis - reactive oxygen species|Chronic myeloid leukemia|Viral myocarditis	GO:0000166,GO:0000287,GO:0000400,GO:0000405,GO:0001726,GO:0001784,GO:0001843,GO:0001922,GO:0001934,GO:0002322,GO:0002333,GO:0003677,GO:0004672,GO:0004713,GO:0004715,GO:0005080,GO:0005515,GO:0005524,GO:0005634,GO:0005654,GO:0005730,GO:0005737,GO:0005739,GO:0005829,GO:0005856,GO:0006281,GO:0006468,GO:0006897,GO:0006909,GO:0006914,GO:0006915,GO:0006974,GO:0006979,GO:0007155,GO:0007173,GO:0007204,GO:…	nucleotide binding|magnesium ion binding|four-way junction DNA binding|bubble DNA binding|ruffle|phosphotyrosine residue binding|neural tube closure|B-1 B cell homeostasis|positive regulation of protein phosphorylation|B cell proliferation involved in immune response|transitional one stage B cell differentiation|DNA binding|protein kinase activity|protein tyrosine kinase activity|non-membrane spa…	WP488,WP407,WP1261	Alpha 6 beta 4 integrin signaling pathway|Kit receptor signaling pathway|ErbB signaling pathway	R-MMU-1266738,R-MMU-162582,R-MMU-1640170,R-MMU-168249,R-MMU-168256,R-MMU-194315,R-MMU-195258,R-MMU-2029480,R-MMU-2029482,R-MMU-212436,R-MMU-376176,R-MMU-422475,R-MMU-428890,R-MMU-453279,R-MMU-525793,R-MMU-5663213,R-MMU-5685938,R-MMU-5693532,R-MMU-5693538,R-MMU-5693565,R-MMU-5693567,R-MMU-5693606,R-MMU-69231,R-MMU-69236,R-MMU-69278,R-MMU-73857,R-MMU-73894,R-MMU-74160,R-MMU-8878171,R-MMU-8939236,R-…	Developmental Biology|Signal Transduction|Cell Cycle|Innate Immune System|Immune System|Signaling by Rho GTPases|RHO GTPase Effectors|Fcgamma receptor (FCGR) dependent phagocytosis|Regulation of actin dynamics for phagocytic cup formation|Generic Transcription Pathway|Signaling by ROBO receptors|Axon guidance|Role of ABL in ROBO-SLIT signaling|Mitotic G1 phase and G1/S transition|Myogenesis|RHO G…
Abl2	2118.11	2121.15	2115.07	0.997211	-0.00402905	0.978799	0.993629	Down	5.44201	4.60224	4.64091	4.96115	4.18038	3.87464	11352	v-abl Abelson murine leukemia viral oncogene 2 (arg%2C Abelson-related gene)	protein_coding	mmu04012,mmu04014,mmu05208,mmu05416	ErbB signaling pathway|Ras signaling pathway|Chemical carcinogenesis - reactive oxygen species|Viral myocarditis	GO:0000166,GO:0000287,GO:0001784,GO:0001843,GO:0001891,GO:0002118,GO:0004672,GO:0004713,GO:0004715,GO:0005515,GO:0005524,GO:0005737,GO:0005856,GO:0006468,GO:0006909,GO:0006930,GO:0007015,GO:0007155,GO:0007173,GO:0007204,GO:0007249,GO:0007266,GO:0007612,GO:0007628,GO:0008104,GO:0008542,GO:0009791,GO:0010863,GO:0010976,GO:0015629,GO:0016301,GO:0016310,GO:0016322,GO:0016740,GO:0018108,GO:0021587,GO:…	nucleotide binding|magnesium ion binding|phosphotyrosine residue binding|neural tube closure|phagocytic cup|aggressive behavior|protein kinase activity|protein tyrosine kinase activity|non-membrane spanning protein tyrosine kinase activity|protein binding|ATP binding|cytoplasm|cytoskeleton|protein phosphorylation|phagocytosis|substrate-dependent cell migration, cell extension|actin filament organ…
Ablim1	2278.64	2572.89	1984.4	0.771215	-0.374795	0.0352754	0.181766	Down	4.64758	5.70667	6.99829	6.03492	6.59753	7.32471	226251	actin-binding LIM protein 1	protein_coding	mmu04360	Axon guidance	GO:0001725,GO:0003779,GO:0005515,GO:0005737,GO:0005856,GO:0006366,GO:0007010,GO:0007411,GO:0014069,GO:0015629,GO:0030027,GO:0030032,GO:0045944,GO:0046872,GO:0051015,GO:0060271	stress fiber|actin binding|protein binding|cytoplasm|cytoskeleton|transcription by RNA polymerase II|cytoskeleton organization|axon guidance|postsynaptic density|actin cytoskeleton|lamellipodium|lamellipodium assembly|positive regulation of transcription by RNA polymerase II|metal ion binding|actin filament binding|cilium assembly
Ablim2	179.434	197.572	161.296	0.816815	-0.291919	0.236631	0.552093	Down	1.22466	1.03859	0.979803	1.36515	0.934638	1.20736	231148	actin-binding LIM protein 2	protein_coding	mmu04360	Axon guidance	GO:0003779,GO:0005737,GO:0006366,GO:0007010,GO:0015629,GO:0030016,GO:0030032,GO:0045944,GO:0046872,GO:0051015	actin binding|cytoplasm|transcription by RNA polymerase II|cytoskeleton organization|actin cytoskeleton|myofibril|lamellipodium assembly|positive regulation of transcription by RNA polymerase II|metal ion binding|actin filament binding
Ablim3	24.4744	43.5541	5.39464	0.124411	-3.00681	0.000114671	0.00231043	Down	0.0374088	0.0556567	0.00560343	0.123838	0.213571	0.378838	319713	actin binding LIM protein family%2C member 3	protein_coding	mmu04360	Axon guidance	GO:0001725,GO:0003779,GO:0005737,GO:0006366,GO:0007010,GO:0015629,GO:0030027,GO:0030032,GO:0045202,GO:0045944,GO:0046872,GO:0051015,GO:0060271,GO:0098978	stress fiber|actin binding|cytoplasm|transcription by RNA polymerase II|cytoskeleton organization|actin cytoskeleton|lamellipodium|lamellipodium assembly|synapse|positive regulation of transcription by RNA polymerase II|metal ion binding|actin filament binding|cilium assembly|glutamatergic synapse
Abo	23.173	30.3438	16.0023	0.527845	-0.921814	0.223957	0.538053	Down	0.381136	0.12736	0.117538	0.36367	0.566575	0.117244	80908	ABO blood group (transferase A%2C alpha 1-3-N-acetylgalactosaminyltransferase%2C transferase B%2C alpha 1-3-galactosyltransferase)	protein_coding	mmu00601,mmu00603	Glycosphingolipid biosynthesis - lacto and neolacto series|Glycosphingolipid biosynthesis - globo and isoglobo series	GO:0000166,GO:0001962,GO:0003823,GO:0004380,GO:0004381,GO:0005576,GO:0005794,GO:0005975,GO:0009312,GO:0016020,GO:0016740,GO:0016757,GO:0016758,GO:0030145,GO:0030259,GO:0031982,GO:0046872	nucleotide binding|alpha-1,3-galactosyltransferase activity|antigen binding|glycoprotein-fucosylgalactoside alpha-N-acetylgalactosaminyltransferase activity|fucosylgalactoside 3-alpha-galactosyltransferase activity|extracellular region|Golgi apparatus|carbohydrate metabolic process|oligosaccharide biosynthetic process|membrane|transferase activity|glycosyltransferase activity|hexosyltransferase a…			R-MMU-1430728,R-MMU-71387,R-MMU-9033658,R-MMU-9033807	Metabolism|Metabolism of carbohydrates|Blood group systems biosynthesis|ABO blood group biosynthesis
Abr	1624.27	1385.18	1863.37	1.34524	0.427867	0.000515159	0.00778666	Up	6.28074	5.44556	5.88492	3.71913	3.66076	4.20568	109934	active BCR-related gene	protein_coding			GO:0002692,GO:0005085,GO:0005096,GO:0005829,GO:0005886,GO:0006909,GO:0007165,GO:0007420,GO:0016020,GO:0016477,GO:0030036,GO:0032496,GO:0035556,GO:0042472,GO:0042995,GO:0043114,GO:0043312,GO:0043314,GO:0043547,GO:0045202,GO:0050728,GO:0050766,GO:0050804,GO:0050885,GO:0051649,GO:0060313,GO:0090630,GO:0098685,GO:0098978,GO:0099092,GO:1905517,GO:1905522	negative regulation of cellular extravasation|guanyl-nucleotide exchange factor activity|GTPase activator activity|cytosol|plasma membrane|phagocytosis|signal transduction|brain development|membrane|cell migration|actin cytoskeleton organization|response to lipopolysaccharide|intracellular signal transduction|inner ear morphogenesis|cell projection|regulation of vascular permeability|neutrophil d…			R-MMU-162582,R-MMU-193648,R-MMU-193704,R-MMU-194315,R-MMU-204998,R-MMU-372790,R-MMU-388396,R-MMU-416482,R-MMU-73887,R-MMU-8980692,R-MMU-9012999,R-MMU-9013026,R-MMU-9013106,R-MMU-9013148,R-MMU-9013149,R-MMU-9013404,R-MMU-9013423,R-MMU-9716542	Signal Transduction|NRAGE signals death through JNK|p75 NTR receptor-mediated signalling|Signaling by Rho GTPases|Cell death signalling via NRAGE, NRIF and NADE|Signaling by GPCR|GPCR downstream signalling|G alpha (12/13) signalling events|Death Receptor Signaling|RHOA GTPase cycle|RHO GTPase cycle|RHOB GTPase cycle|RHOC GTPase cycle|CDC42 GTPase cycle|RAC1 GTPase cycle|RAC2 GTPase cycle|RAC3 GTP…
Abracl	1378.04	1088.9	1667.18	1.531	0.614475	1.43083e-05	0.000420138	Up	56.8903	56.7139	58.4629	29.3303	31.9977	38.3234	73112	ABRA C-terminal like	protein_coding			GO:0003674,GO:0005575,GO:0032970	molecular_function|cellular_component|regulation of actin filament-based process
Abraxas1	334.588	278.715	390.462	1.40068	0.486127	0.00521455	0.0472623	Up	3.83447	3.52599	4.11838	2.35899	2.74213	2.15904	70681	BRCA1 A complex subunit	protein_coding	mmu03440	Homologous recombination	GO:0005634,GO:0006281,GO:0006282,GO:0006302,GO:0006325,GO:0006974,GO:0007095,GO:0008017,GO:0008608,GO:0010212,GO:0016604,GO:0031593,GO:0044818,GO:0045739,GO:0070531,GO:0070536,GO:0090307	nucleus|DNA repair|regulation of DNA repair|double-strand break repair|chromatin organization|DNA damage response|mitotic G2 DNA damage checkpoint signaling|microtubule binding|attachment of spindle microtubules to kinetochore|response to ionizing radiation|nuclear body|polyubiquitin modification-dependent protein binding|mitotic G2/M transition checkpoint|positive regulation of DNA repair|BRCA1-…			R-MMU-1640170,R-MMU-392499,R-MMU-5688426,R-MMU-5689901,R-MMU-5693532,R-MMU-5693538,R-MMU-5693565,R-MMU-5693567,R-MMU-5693571,R-MMU-5693606,R-MMU-5693607,R-MMU-597592,R-MMU-69473,R-MMU-69481,R-MMU-69620,R-MMU-73894	Cell Cycle|Metabolism of proteins|Deubiquitination|Metalloprotease DUBs|DNA Double-Strand Break Repair|Homology Directed Repair|Recruitment and ATM-mediated phosphorylation of repair and signaling proteins at DNA double strand breaks|HDR through Homologous Recombination (HRR) or Single Strand Annealing (SSA)|Nonhomologous End-Joining (NHEJ)|DNA Double Strand Break Response|Processing of DNA doubl…
Abraxas2	1888.37	2100.5	1676.23	0.79804	-0.325467	0.0103041	0.0773756	Down	19.6579	16.4702	16.6399	18.5874	21.419	18.5798	109359	BRISC complex subunit	protein_coding			GO:0000278,GO:0002931,GO:0005515,GO:0005634,GO:0005737,GO:0005813,GO:0005856,GO:0005874,GO:0007049,GO:0007059,GO:0008017,GO:0008608,GO:0030496,GO:0031593,GO:0031616,GO:0036449,GO:0043066,GO:0051301,GO:0070536,GO:0070552,GO:0071497,GO:0090307	mitotic cell cycle|response to ischemia|protein binding|nucleus|cytoplasm|centrosome|cytoskeleton|microtubule|cell cycle|chromosome segregation|microtubule binding|attachment of spindle microtubules to kinetochore|midbody|polyubiquitin modification-dependent protein binding|spindle pole centrosome|microtubule minus-end|negative regulation of apoptotic process|cell division|protein K63-linked deub…			R-MMU-392499,R-MMU-5688426,R-MMU-5689901,R-MMU-597592	Metabolism of proteins|Deubiquitination|Metalloprotease DUBs|Post-translational protein modification
Abt1	706.123	673.277	738.969	1.0978	0.134614	0.380646	0.688735	Up	5.49456	5.02334	4.57924	4.2054	3.70436	4.26602	30946	activator of basal transcription 1	protein_coding			GO:0000447,GO:0000472,GO:0000480,GO:0003676,GO:0003677,GO:0003723,GO:0005634,GO:0005667,GO:0005730,GO:0006357,GO:0021522,GO:0034462	endonucleolytic cleavage in ITS1 to separate SSU-rRNA from 5.8S rRNA and LSU-rRNA from tricistronic rRNA transcript (SSU-rRNA, 5.8S rRNA, LSU-rRNA)|endonucleolytic cleavage to generate mature 5'-end of SSU-rRNA from (SSU-rRNA, 5.8S rRNA, LSU-rRNA)|endonucleolytic cleavage in 5'-ETS of tricistronic rRNA transcript (SSU-rRNA, 5.8S rRNA, LSU-rRNA)|nucleic acid binding|DNA binding|RNA binding|nucleus…
Abtb1	1016.16	999.214	1033.11	1.03401	0.0482537	0.751341	0.903682	Up	16.8468	12.9333	13.3018	11.9123	11.7172	13.2196	80283	ankyrin repeat and BTB (POZ) domain containing 1	protein_coding			GO:0000151,GO:0003746,GO:0005730,GO:0005737,GO:0005829,GO:0005886,GO:0006412,GO:0006414	ubiquitin ligase complex|translation elongation factor activity|nucleolus|cytoplasm|cytosol|plasma membrane|translation|translational elongation
Abtb2	271.12	373.821	168.419	0.450409	-1.15069	0.000283119	0.00491142	Down	0.686596	1.24549	1.42168	2.22611	1.6751	2.70214	99382	ankyrin repeat and BTB (POZ) domain containing 2	protein_coding			GO:0046982,GO:0097237	protein heterodimerization activity|cellular response to toxic substance
Abtb3	109.542	90.6228	128.461	1.41768	0.503528	0.187898	0.491913	Up	0.569944	0.552384	0.374826	0.293059	0.463788	0.184201	74007	ankyrin repeat and BTB domain containing 3	protein_coding			GO:0016020,GO:0046982,GO:0060395	membrane|protein heterodimerization activity|SMAD protein signal transduction
Acaa1a	2671.94	2325.42	3018.45	1.29803	0.376329	0.0371547	0.18734	Up	42.4423	48.0826	47.4686	30.8993	25.2077	38.0754	113868	acetyl-Coenzyme A acyltransferase 1A	protein_coding	mmu00071,mmu00592,mmu01040,mmu00280,mmu04146,mmu03320	Fatty acid degradation|alpha-Linolenic acid metabolism|Biosynthesis of unsaturated fatty acids|Valine, leucine and isoleucine degradation|Peroxisome|PPAR signaling pathway	GO:0000038,GO:0003985,GO:0003988,GO:0005739,GO:0005777,GO:0005782,GO:0006629,GO:0006631,GO:0006635,GO:0007584,GO:0008206,GO:0008775,GO:0010124,GO:0016401,GO:0016740,GO:0016746,GO:0016747,GO:0048545,GO:0050633	very long-chain fatty acid metabolic process|acetyl-CoA C-acetyltransferase activity|acetyl-CoA C-acyltransferase activity|mitochondrion|peroxisome|peroxisomal matrix|lipid metabolic process|fatty acid metabolic process|fatty acid beta-oxidation|response to nutrient|bile acid metabolic process|acetate CoA-transferase activity|phenylacetate catabolic process|palmitoyl-CoA oxidase activity|transfer…	WP4347,WP662,WP4348,WP2316	Eicosanoid metabolism via cyclooxygenases (COX)|Amino acid metabolism|Eicosanoid metabolism via lipoxygenases (LOX)|PPAR signaling pathway
Acaa1b	147.691	127.951	167.432	1.30844	0.387844	0.208639	0.518145	Up	1.79627	2.6455	2.33891	1.26506	1.26957	2.07383	235674	acetyl-Coenzyme A acyltransferase 1B	protein_coding	mmu00071,mmu00592,mmu01040,mmu00280,mmu04146,mmu03320	Fatty acid degradation|alpha-Linolenic acid metabolism|Biosynthesis of unsaturated fatty acids|Valine, leucine and isoleucine degradation|Peroxisome|PPAR signaling pathway	GO:0000038,GO:0003985,GO:0003988,GO:0005739,GO:0005777,GO:0006629,GO:0006631,GO:0006635,GO:0008206,GO:0008775,GO:0010124,GO:0016401,GO:0016740,GO:0016746,GO:0016747,GO:0050633	very long-chain fatty acid metabolic process|acetyl-CoA C-acetyltransferase activity|acetyl-CoA C-acyltransferase activity|mitochondrion|peroxisome|lipid metabolic process|fatty acid metabolic process|fatty acid beta-oxidation|bile acid metabolic process|acetate CoA-transferase activity|phenylacetate catabolic process|palmitoyl-CoA oxidase activity|transferase activity|acyltransferase activity|ac…	WP2316	PPAR signaling pathway	R-MMU-1430728,R-MMU-168249,R-MMU-168256,R-MMU-2046104,R-MMU-2046106,R-MMU-390247,R-MMU-390918,R-MMU-556833,R-MMU-6798695,R-MMU-8978868,R-MMU-9033241,R-MMU-9609507	Metabolism|Innate Immune System|Immune System|alpha-linolenic (omega3) and linoleic (omega6) acid metabolism|alpha-linolenic acid (ALA) metabolism|Beta-oxidation of very long chain fatty acids|Peroxisomal lipid metabolism|Metabolism of lipids|Neutrophil degranulation|Fatty acid metabolism|Peroxisomal protein import|Protein localization
Acaa2	1472.6	1123.18	1822.03	1.62213	0.697891	0.00554336	0.0493906	Up	24.3698	40.3858	45.5346	18.14	17.5576	24.6939	52538	acetyl-Coenzyme A acyltransferase 2 (mitochondrial 3-oxoacyl-Coenzyme A thiolase)	protein_coding	mmu00062,mmu00071,mmu00280	Fatty acid elongation|Fatty acid degradation|Valine, leucine and isoleucine degradation	GO:0003985,GO:0003986,GO:0003988,GO:0005739,GO:0005743,GO:0005759,GO:0006084,GO:0006629,GO:0006631,GO:0006635,GO:0016290,GO:0016740,GO:0016746,GO:0016747,GO:0016787,GO:0047617,GO:0071456,GO:0102991,GO:1901029,GO:1902109	acetyl-CoA C-acetyltransferase activity|acetyl-CoA hydrolase activity|acetyl-CoA C-acyltransferase activity|mitochondrion|mitochondrial inner membrane|mitochondrial matrix|acetyl-CoA metabolic process|lipid metabolic process|fatty acid metabolic process|fatty acid beta-oxidation|palmitoyl-CoA hydrolase activity|transferase activity|acyltransferase activity|acyltransferase activity, transferring g…	WP336,WP2318	Fatty acid biosynthesis|Fatty acid oxidation	R-MMU-1430728,R-MMU-556833,R-MMU-77289,R-MMU-8978868	Metabolism|Metabolism of lipids|Mitochondrial Fatty Acid Beta-Oxidation|Fatty acid metabolism
Acaca	975.474	974.738	976.21	1.00146	0.00210605	0.989953	0.997346	Up	2.47404	2.63692	3.23614	2.65482	2.20567	2.5107	107476	acetyl-Coenzyme A carboxylase alpha	protein_coding	mmu00620,mmu00640,mmu00061,mmu04152,mmu04910,mmu04922,mmu04936	Pyruvate metabolism|Propanoate metabolism|Fatty acid biosynthesis|AMPK signaling pathway|Insulin signaling pathway|Glucagon signaling pathway|Alcoholic liver disease	GO:0000166,GO:0001650,GO:0001894,GO:0003824,GO:0003989,GO:0005515,GO:0005524,GO:0005737,GO:0005739,GO:0005829,GO:0006084,GO:0006629,GO:0006631,GO:0006633,GO:0008152,GO:0008610,GO:0009374,GO:0014070,GO:0015629,GO:0016874,GO:0019538,GO:0019900,GO:0042802,GO:0046872,GO:0051289,GO:0055088,GO:0071380	nucleotide binding|fibrillar center|tissue homeostasis|catalytic activity|acetyl-CoA carboxylase activity|protein binding|ATP binding|cytoplasm|mitochondrion|cytosol|acetyl-CoA metabolic process|lipid metabolic process|fatty acid metabolic process|fatty acid biosynthetic process|metabolic process|lipid biosynthetic process|biotin binding|response to organic cyclic compound|actin cytoskeleton|liga…	WP683,WP336,WP2841,WP3855	Leptin and adiponectin|Fatty acid biosynthesis|Focal adhesion: PI3K-Akt-mTOR signaling pathway|Dysregulated miRNA targeting in insulin/PI3K-AKT signaling	R-MMU-1430728,R-MMU-163685,R-MMU-163765,R-MMU-196780,R-MMU-196849,R-MMU-196854,R-MMU-200425,R-MMU-556833,R-MMU-75105,R-MMU-8978868	Metabolism|Integration of energy metabolism|ChREBP activates metabolic gene expression|Biotin transport and metabolism|Metabolism of water-soluble vitamins and cofactors|Metabolism of vitamins and cofactors|Carnitine metabolism|Metabolism of lipids|Fatty acyl-CoA biosynthesis|Fatty acid metabolism
Acacb	251.841	289.241	214.44	0.741605	-0.431277	0.123871	0.389871	Down	0.766626	0.632646	0.524116	0.867237	0.919362	0.511669	100705	acetyl-Coenzyme A carboxylase beta	protein_coding	mmu00620,mmu00640,mmu00061,mmu04152,mmu04910,mmu04922,mmu04920,mmu04936,mmu04931	Pyruvate metabolism|Propanoate metabolism|Fatty acid biosynthesis|AMPK signaling pathway|Insulin signaling pathway|Glucagon signaling pathway|Adipocytokine signaling pathway|Alcoholic liver disease|Insulin resistance	GO:0000166,GO:0003824,GO:0003989,GO:0005524,GO:0005634,GO:0005739,GO:0006084,GO:0006629,GO:0006631,GO:0006633,GO:0008152,GO:0009374,GO:0010629,GO:0010884,GO:0010906,GO:0014070,GO:0016874,GO:0031667,GO:0031999,GO:0042802,GO:0043086,GO:0046322,GO:0046872,GO:0050995,GO:0051289,GO:0060421,GO:0097009,GO:2001295	nucleotide binding|catalytic activity|acetyl-CoA carboxylase activity|ATP binding|nucleus|mitochondrion|acetyl-CoA metabolic process|lipid metabolic process|fatty acid metabolic process|fatty acid biosynthetic process|metabolic process|biotin binding|negative regulation of gene expression|positive regulation of lipid storage|regulation of glucose metabolic process|response to organic cyclic compo…	WP336	Fatty acid biosynthesis	R-MMU-1430728,R-MMU-163685,R-MMU-163765,R-MMU-196780,R-MMU-196849,R-MMU-196854,R-MMU-200425,R-MMU-556833,R-MMU-8978868	Metabolism|Integration of energy metabolism|ChREBP activates metabolic gene expression|Biotin transport and metabolism|Metabolism of water-soluble vitamins and cofactors|Metabolism of vitamins and cofactors|Carnitine metabolism|Metabolism of lipids|Fatty acid metabolism
Acad10	329.52	255.204	403.835	1.58301	0.662668	0.000613294	0.00895805	Up	3.54562	3.10116	2.7971	1.90146	1.54795	1.82868	71985	acyl-Coenzyme A dehydrogenase family%2C member 10	protein_coding			GO:0003995,GO:0005737,GO:0005739,GO:0016491,GO:0016627,GO:0033539,GO:0050660	acyl-CoA dehydrogenase activity|cytoplasm|mitochondrion|oxidoreductase activity|oxidoreductase activity, acting on the CH-CH group of donors|fatty acid beta-oxidation using acyl-CoA dehydrogenase|flavin adenine dinucleotide binding			R-MMU-1430728,R-MMU-556833,R-MMU-77289,R-MMU-8978868	Metabolism|Metabolism of lipids|Mitochondrial Fatty Acid Beta-Oxidation|Fatty acid metabolism
Acad11	1410.76	1352.55	1468.97	1.08603	0.119065	0.357307	0.667941	Up	12.1523	13.55	14.345	10.7199	10.7453	11.2282	102632	acyl-Coenzyme A dehydrogenase family%2C member 11	protein_coding			GO:0003995,GO:0004466,GO:0005634,GO:0005737,GO:0005739,GO:0005777,GO:0006629,GO:0006631,GO:0016020,GO:0016491,GO:0016627,GO:0017099,GO:0031966,GO:0033539,GO:0050660,GO:0070991	acyl-CoA dehydrogenase activity|long-chain-acyl-CoA dehydrogenase activity|nucleus|cytoplasm|mitochondrion|peroxisome|lipid metabolic process|fatty acid metabolic process|membrane|oxidoreductase activity|oxidoreductase activity, acting on the CH-CH group of donors|very-long-chain-acyl-CoA dehydrogenase activity|mitochondrial membrane|fatty acid beta-oxidation using acyl-CoA dehydrogenase|flavin a…			R-MMU-1430728,R-MMU-556833,R-MMU-77289,R-MMU-8978868	Metabolism|Metabolism of lipids|Mitochondrial Fatty Acid Beta-Oxidation|Fatty acid metabolism
Acad12	138.274	155.547	121.001	0.777431	-0.363214	0.251279	0.568263	Down	1.34752	1.04945	2.17633	1.91384	1.66052	1.60386	338350	acyl-Coenzyme A dehydrogenase family%2C member 12	protein_coding			GO:0003995,GO:0005737,GO:0005739,GO:0033539	acyl-CoA dehydrogenase activity|cytoplasm|mitochondrion|fatty acid beta-oxidation using acyl-CoA dehydrogenase
Acad8	763.424	783.354	743.495	0.949243	-0.0751505	0.580994	0.818707	Down	8.38119	7.33724	7.52031	7.59929	7.33811	6.73091	66948	acyl-Coenzyme A dehydrogenase family%2C member 8	protein_coding	mmu00280	Valine, leucine and isoleucine degradation	GO:0003995,GO:0005739,GO:0006629,GO:0009083,GO:0016491,GO:0016627,GO:0050660	acyl-CoA dehydrogenase activity|mitochondrion|lipid metabolic process|branched-chain amino acid catabolic process|oxidoreductase activity|oxidoreductase activity, acting on the CH-CH group of donors|flavin adenine dinucleotide binding			R-MMU-1430728,R-MMU-70895,R-MMU-71291	Metabolism|Branched-chain amino acid catabolism|Metabolism of amino acids and derivatives
Acad9	883.848	847.574	920.122	1.08568	0.118597	0.443073	0.735399	Up	7.82132	6.76584	6.72189	5.97943	6.44312	4.96414	229211	acyl-Coenzyme A dehydrogenase family%2C member 9	protein_coding			GO:0001676,GO:0003995,GO:0004466,GO:0005634,GO:0005739,GO:0005743,GO:0016020,GO:0016491,GO:0016627,GO:0030425,GO:0031966,GO:0032981,GO:0050660,GO:0051791,GO:0070991	long-chain fatty acid metabolic process|acyl-CoA dehydrogenase activity|long-chain-acyl-CoA dehydrogenase activity|nucleus|mitochondrion|mitochondrial inner membrane|membrane|oxidoreductase activity|oxidoreductase activity, acting on the CH-CH group of donors|dendrite|mitochondrial membrane|mitochondrial respiratory chain complex I assembly|flavin adenine dinucleotide binding|medium-chain fatty a…			R-MMU-1428517,R-MMU-1430728,R-MMU-163200,R-MMU-611105,R-MMU-6799198	The citric acid (TCA) cycle and respiratory electron transport|Metabolism|Respiratory electron transport, ATP synthesis by chemiosmotic coupling, and heat production by uncoupling proteins.|Respiratory electron transport|Complex I biogenesis
Acadl	2324.59	2473.48	2175.71	0.879604	-0.185074	0.0680986	0.274359	Down	33.4535	32.8746	35.374	34.1931	34.4499	33.7779	11363	acyl-Coenzyme A dehydrogenase%2C long-chain	protein_coding	mmu00071,mmu03320	Fatty acid degradation|PPAR signaling pathway	GO:0000062,GO:0001659,GO:0003995,GO:0004466,GO:0005737,GO:0005739,GO:0005759,GO:0006629,GO:0006631,GO:0009062,GO:0009409,GO:0016401,GO:0016491,GO:0016627,GO:0019254,GO:0031966,GO:0033539,GO:0042413,GO:0042758,GO:0042802,GO:0044242,GO:0045717,GO:0046322,GO:0050660,GO:0090181,GO:0120162	fatty-acyl-CoA binding|temperature homeostasis|acyl-CoA dehydrogenase activity|long-chain-acyl-CoA dehydrogenase activity|cytoplasm|mitochondrion|mitochondrial matrix|lipid metabolic process|fatty acid metabolic process|fatty acid catabolic process|response to cold|palmitoyl-CoA oxidase activity|oxidoreductase activity|oxidoreductase activity, acting on the CH-CH group of donors|carnitine metabol…	WP401,WP1269,WP2316	Mitochondrial long chain fatty acid beta-oxidation|Fatty acid beta-oxidation|PPAR signaling pathway	R-MMU-1430728,R-MMU-556833,R-MMU-77285,R-MMU-77286,R-MMU-77289,R-MMU-77310,R-MMU-8978868	Metabolism|Metabolism of lipids|Beta oxidation of myristoyl-CoA to lauroyl-CoA|mitochondrial fatty acid beta-oxidation of saturated fatty acids|Mitochondrial Fatty Acid Beta-Oxidation|Beta oxidation of lauroyl-CoA to decanoyl-CoA-CoA|Fatty acid metabolism
Acadm	6244.88	6724.18	5765.57	0.857437	-0.221897	0.0668947	0.271225	Down	84.3792	84.3564	85.7724	81.2148	83.2745	98.6067	11364	acyl-Coenzyme A dehydrogenase%2C medium chain	protein_coding	mmu00071,mmu00280,mmu03320,mmu04936	Fatty acid degradation|Valine, leucine and isoleucine degradation|PPAR signaling pathway|Alcoholic liver disease	GO:0000062,GO:0001889,GO:0003995,GO:0005737,GO:0005739,GO:0005759,GO:0005978,GO:0006082,GO:0006111,GO:0006629,GO:0006631,GO:0006635,GO:0007507,GO:0009409,GO:0009437,GO:0009791,GO:0016491,GO:0016627,GO:0016853,GO:0019254,GO:0030424,GO:0031966,GO:0033539,GO:0042594,GO:0042802,GO:0045329,GO:0050660,GO:0051791,GO:0051793,GO:0055007,GO:0070991	fatty-acyl-CoA binding|liver development|acyl-CoA dehydrogenase activity|cytoplasm|mitochondrion|mitochondrial matrix|glycogen biosynthetic process|organic acid metabolic process|regulation of gluconeogenesis|lipid metabolic process|fatty acid metabolic process|fatty acid beta-oxidation|heart development|response to cold|carnitine metabolic process|post-embryonic development|oxidoreductase activi…	WP401,WP1269,WP662,WP2318,WP2316	Mitochondrial long chain fatty acid beta-oxidation|Fatty acid beta-oxidation|Amino acid metabolism|Fatty acid oxidation|PPAR signaling pathway	R-MMU-1430728,R-MMU-556833,R-MMU-77286,R-MMU-77288,R-MMU-77289,R-MMU-77346,R-MMU-77348,R-MMU-8978868	Metabolism|Metabolism of lipids|mitochondrial fatty acid beta-oxidation of saturated fatty acids|mitochondrial fatty acid beta-oxidation of unsaturated fatty acids|Mitochondrial Fatty Acid Beta-Oxidation|Beta oxidation of decanoyl-CoA to octanoyl-CoA-CoA|Beta oxidation of octanoyl-CoA to hexanoyl-CoA|Fatty acid metabolism
Acads	2061.78	1881.71	2241.86	1.19142	0.252681	0.170356	0.46589	Up	34.3988	37.9207	36.7021	26.3642	21.5056	33.193	11409	acyl-Coenzyme A dehydrogenase%2C short chain	protein_coding	mmu00640,mmu00650,mmu00071,mmu00280,mmu00410	Propanoate metabolism|Butanoate metabolism|Fatty acid degradation|Valine, leucine and isoleucine degradation|beta-Alanine metabolism	GO:0000062,GO:0003995,GO:0004085,GO:0005654,GO:0005739,GO:0005759,GO:0005813,GO:0006629,GO:0006631,GO:0016491,GO:0016627,GO:0016937,GO:0031966,GO:0033539,GO:0042802,GO:0046359,GO:0050660	fatty-acyl-CoA binding|acyl-CoA dehydrogenase activity|butyryl-CoA dehydrogenase activity|nucleoplasm|mitochondrion|mitochondrial matrix|centrosome|lipid metabolic process|fatty acid metabolic process|oxidoreductase activity|oxidoreductase activity, acting on the CH-CH group of donors|short-chain-acyl-CoA dehydrogenase activity|mitochondrial membrane|fatty acid beta-oxidation using acyl-CoA dehyd…	WP401,WP1269,WP2318	Mitochondrial long chain fatty acid beta-oxidation|Fatty acid beta-oxidation|Fatty acid oxidation	R-MMU-1430728,R-MMU-556833,R-MMU-77286,R-MMU-77289,R-MMU-77350,R-MMU-77352,R-MMU-8978868	Metabolism|Metabolism of lipids|mitochondrial fatty acid beta-oxidation of saturated fatty acids|Mitochondrial Fatty Acid Beta-Oxidation|Beta oxidation of hexanoyl-CoA to butanoyl-CoA|Beta oxidation of butanoyl-CoA to acetyl-CoA|Fatty acid metabolism
Acadsb	2101.89	2326.45	1877.32	0.806957	-0.309436	0.0132091	0.0929996	Down	17.8622	15.6547	17.5923	19.7948	19.4165	16.8235	66885	acyl-Coenzyme A dehydrogenase%2C short/branched chain	protein_coding	mmu00071,mmu00280	Fatty acid degradation|Valine, leucine and isoleucine degradation	GO:0003853,GO:0003995,GO:0005739,GO:0006550,GO:0006629,GO:0006631,GO:0006637,GO:0009055,GO:0016491,GO:0016627,GO:0016937,GO:0042802,GO:0050660,GO:0102035	2-methylacyl-CoA dehydrogenase activity|acyl-CoA dehydrogenase activity|mitochondrion|isoleucine catabolic process|lipid metabolic process|fatty acid metabolic process|acyl-CoA metabolic process|electron transfer activity|oxidoreductase activity|oxidoreductase activity, acting on the CH-CH group of donors|short-chain-acyl-CoA dehydrogenase activity|identical protein binding|flavin adenine dinucle…			R-MMU-1430728,R-MMU-70895,R-MMU-71291	Metabolism|Branched-chain amino acid catabolism|Metabolism of amino acids and derivatives
Acadvl	2340.04	2363.25	2316.83	0.980421	-0.0285267	0.82511	0.934114	Down	36.0701	31.4421	28.9229	28.1029	28.6367	30.3941	11370	acyl-Coenzyme A dehydrogenase%2C very long chain	protein_coding	mmu00071,mmu04936	Fatty acid degradation|Alcoholic liver disease	GO:0000062,GO:0001659,GO:0003995,GO:0004466,GO:0005654,GO:0005730,GO:0005739,GO:0005743,GO:0006629,GO:0006631,GO:0006635,GO:0009062,GO:0009409,GO:0016020,GO:0016491,GO:0016627,GO:0017099,GO:0031966,GO:0033539,GO:0042645,GO:0042802,GO:0045717,GO:0046322,GO:0050660,GO:0090181	fatty-acyl-CoA binding|temperature homeostasis|acyl-CoA dehydrogenase activity|long-chain-acyl-CoA dehydrogenase activity|nucleoplasm|nucleolus|mitochondrion|mitochondrial inner membrane|lipid metabolic process|fatty acid metabolic process|fatty acid beta-oxidation|fatty acid catabolic process|response to cold|membrane|oxidoreductase activity|oxidoreductase activity, acting on the CH-CH group of …	WP401,WP1269,WP2318	Mitochondrial long chain fatty acid beta-oxidation|Fatty acid beta-oxidation|Fatty acid oxidation	R-MMU-1430728,R-MMU-556833,R-MMU-77286,R-MMU-77289,R-MMU-77305,R-MMU-8978868	Metabolism|Metabolism of lipids|mitochondrial fatty acid beta-oxidation of saturated fatty acids|Mitochondrial Fatty Acid Beta-Oxidation|Beta oxidation of palmitoyl-CoA to myristoyl-CoA|Fatty acid metabolism
Acan	58.4825	75.0816	41.8834	0.557742	-0.84233	0.333943	0.64936	Down	0.214444	0.151468	0.128486	0.0276071	0.692163	0.0791139	11595	aggrecan	protein_coding			GO:0001501,GO:0001502,GO:0002052,GO:0002063,GO:0005509,GO:0005515,GO:0005540,GO:0005576,GO:0005604,GO:0005615,GO:0007155,GO:0007417,GO:0007507,GO:0010001,GO:0030166,GO:0030199,GO:0030246,GO:0030336,GO:0031012,GO:0043025,GO:0045202,GO:0046872,GO:0072534,GO:0098966,GO:0098978,GO:0098982	skeletal system development|cartilage condensation|positive regulation of neuroblast proliferation|chondrocyte development|calcium ion binding|protein binding|hyaluronic acid binding|extracellular region|basement membrane|extracellular space|cell adhesion|central nervous system development|heart development|glial cell differentiation|proteoglycan biosynthetic process|collagen fibril organization|…	WP1270,WP2432	Endochondral ossification|Spinal cord injury	R-MMU-1430728,R-MMU-1474228,R-MMU-1474244,R-MMU-1630316,R-MMU-1638074,R-MMU-2022854,R-MMU-2022857,R-MMU-3000178,R-MMU-71387	Metabolism|Degradation of the extracellular matrix|Extracellular matrix organization|Glycosaminoglycan metabolism|Keratan sulfate/keratin metabolism|Keratan sulfate biosynthesis|Keratan sulfate degradation|ECM proteoglycans|Metabolism of carbohydrates
Acap1	44.3269	45.2136	43.4402	0.960015	-0.0588717	0.890549	0.962208	Down	0.399671	0.444621	0.660027	0.416767	0.364077	0.603803	216859	ArfGAP with coiled-coil%2C ankyrin repeat and PH domains 1	protein_coding	mmu04144	Endocytosis	GO:0003674,GO:0005096,GO:0005737,GO:0005768,GO:0006629,GO:0007165,GO:0008150,GO:0016020,GO:0016042,GO:0046872	molecular_function|GTPase activator activity|cytoplasm|endosome|lipid metabolic process|signal transduction|biological_process|membrane|lipid catabolic process|metal ion binding
Acap2	2080.02	2279.28	1880.76	0.825198	-0.277187	0.0403272	0.197132	Down	4.18524	3.49508	3.53158	4.12569	4.31884	3.58432	78618	ArfGAP with coiled-coil%2C ankyrin repeat and PH domains 2	protein_coding	mmu04144	Endocytosis	GO:0001726,GO:0005096,GO:0005515,GO:0005737,GO:0005768,GO:0010008,GO:0016020,GO:0030029,GO:0031267,GO:0032456,GO:0046872,GO:0080025,GO:1990090	ruffle|GTPase activator activity|protein binding|cytoplasm|endosome|endosome membrane|membrane|actin filament-based process|small GTPase binding|endocytic recycling|metal ion binding|phosphatidylinositol-3,5-bisphosphate binding|cellular response to nerve growth factor stimulus
Acap3	422.191	373.761	470.621	1.25892	0.332188	0.0611998	0.25543	Up	3.40525	2.84114	3.31852	1.86747	2.30095	2.561	140500	ArfGAP with coiled-coil%2C ankyrin repeat and PH domains 3	protein_coding	mmu04144	Endocytosis	GO:0001764,GO:0005096,GO:0010975,GO:0030426	neuron migration|GTPase activator activity|regulation of neuron projection development|growth cone
Acat1	3716.16	3330.27	4102.04	1.23172	0.300676	0.0096671	0.0740687	Up	34.906	37.6029	38.1285	24.7882	26.3658	28.5231	110446	acetyl-Coenzyme A acetyltransferase 1	protein_coding	mmu00620,mmu00630,mmu00650,mmu00071,mmu00280,mmu00310,mmu00380,mmu00900,mmu04975	Pyruvate metabolism|Glyoxylate and dicarboxylate metabolism|Butanoate metabolism|Fatty acid degradation|Valine, leucine and isoleucine degradation|Lysine degradation|Tryptophan metabolism|Terpenoid backbone biosynthesis|Fat digestion and absorption	GO:0003985,GO:0005739,GO:0005743,GO:0005759,GO:0005783,GO:0006085,GO:0006550,GO:0006629,GO:0006631,GO:0006635,GO:0015936,GO:0015937,GO:0016453,GO:0016740,GO:0016746,GO:0016747,GO:0019899,GO:0030955,GO:0034736,GO:0042802,GO:0046356,GO:0046872,GO:0046952,GO:0120225,GO:1902860	acetyl-CoA C-acetyltransferase activity|mitochondrion|mitochondrial inner membrane|mitochondrial matrix|endoplasmic reticulum|acetyl-CoA biosynthetic process|isoleucine catabolic process|lipid metabolic process|fatty acid metabolic process|fatty acid beta-oxidation|coenzyme A metabolic process|coenzyme A biosynthetic process|C-acetyltransferase activity|transferase activity|acyltransferase activi…	WP543,WP79,WP4346,WP1269	Synthesis and degradation of ketone bodies|Tryptophan metabolism|Cholesterol metabolism with Bloch and Kandutsch-Russell pathways|Fatty acid beta-oxidation	R-MMU-1430728,R-MMU-556833,R-MMU-70895,R-MMU-71291,R-MMU-74182,R-MMU-77108,R-MMU-77111	Metabolism|Metabolism of lipids|Branched-chain amino acid catabolism|Metabolism of amino acids and derivatives|Ketone body metabolism|Utilization of Ketone Bodies|Synthesis of Ketone Bodies
Acat2	681.856	600.166	763.546	1.27207	0.347179	0.303511	0.62101	Up	5.87786	11.5619	15.9788	6.35532	6.71531	10.2608	110460	acetyl-Coenzyme A acetyltransferase 2	protein_coding	mmu00620,mmu00630,mmu00650,mmu00071,mmu00280,mmu00310,mmu00380,mmu00900,mmu04975	Pyruvate metabolism|Glyoxylate and dicarboxylate metabolism|Butanoate metabolism|Fatty acid degradation|Valine, leucine and isoleucine degradation|Lysine degradation|Tryptophan metabolism|Terpenoid backbone biosynthesis|Fat digestion and absorption	GO:0003985,GO:0005737,GO:0005739,GO:0006635,GO:0016740,GO:0016746,GO:0016747,GO:0045797	acetyl-CoA C-acetyltransferase activity|cytoplasm|mitochondrion|fatty acid beta-oxidation|transferase activity|acyltransferase activity|acyltransferase activity, transferring groups other than amino-acyl groups|positive regulation of intestinal cholesterol absorption	WP4346	Cholesterol metabolism with Bloch and Kandutsch-Russell pathways	R-MMU-1430728,R-MMU-191273,R-MMU-556833,R-MMU-8957322	Metabolism|Cholesterol biosynthesis|Metabolism of lipids|Metabolism of steroids
Acat3	37.0647	21.9616	52.1678	2.37334	1.24692	0.146093	0.428599	Up	0.086305	0.665368	1.47374	0.128567	0.231871	0.472825	224530	acetyl-Coenzyme A acetyltransferase 3	protein_coding	mmu00620,mmu00630,mmu00650,mmu00071,mmu00280,mmu00310,mmu00380,mmu00900,mmu04975	Pyruvate metabolism|Glyoxylate and dicarboxylate metabolism|Butanoate metabolism|Fatty acid degradation|Valine, leucine and isoleucine degradation|Lysine degradation|Tryptophan metabolism|Terpenoid backbone biosynthesis|Fat digestion and absorption	GO:0003985,GO:0005737,GO:0005739,GO:0006635	acetyl-CoA C-acetyltransferase activity|cytoplasm|mitochondrion|fatty acid beta-oxidation
Acbd3	3621.92	3809.26	3434.58	0.901675	-0.149321	0.143561	0.424099	Down	32.0187	29.2028	28.8932	29.5837	30.1276	28.8183	170760	acyl-Coenzyme A binding domain containing 3	protein_coding	mmu05132	Salmonella infection	GO:0000062,GO:0000139,GO:0005739,GO:0005794,GO:0006629,GO:0006694,GO:0016020,GO:0034237	fatty-acyl-CoA binding|Golgi membrane|mitochondrion|Golgi apparatus|lipid metabolic process|steroid biosynthetic process|membrane|protein kinase A regulatory subunit binding			R-MMU-199991,R-MMU-199992,R-MMU-432722,R-MMU-5653656	Membrane Trafficking|trans-Golgi Network Vesicle Budding|Golgi Associated Vesicle Biogenesis|Vesicle-mediated transport
Acbd5	2271.2	2613.31	1929.09	0.738136	-0.438042	0.00151288	0.0184418	Down	14.179	13.7397	17.5254	18.8933	17.4969	18.0574	74159	acyl-Coenzyme A binding domain containing 5	protein_coding			GO:0000062,GO:0005654,GO:0005737,GO:0005777,GO:0006631,GO:0006914,GO:0008289,GO:0016020,GO:0030242	fatty-acyl-CoA binding|nucleoplasm|cytoplasm|peroxisome|fatty acid metabolic process|autophagy|lipid binding|membrane|autophagy of peroxisome			R-MMU-1430728,R-MMU-162582,R-MMU-194315,R-MMU-390918,R-MMU-556833,R-MMU-8978868,R-MMU-8980692,R-MMU-9012999,R-MMU-9013106,R-MMU-9603798,R-MMU-9609507,R-MMU-9716542	Metabolism|Signal Transduction|Signaling by Rho GTPases|Peroxisomal lipid metabolism|Metabolism of lipids|Fatty acid metabolism|RHOA GTPase cycle|RHO GTPase cycle|RHOC GTPase cycle|Class I peroxisomal membrane protein import|Protein localization|Signaling by Rho GTPases, Miro GTPases and RHOBTB3
Acbd6	670.093	711.27	628.917	0.884364	-0.177288	0.183105	0.484824	Down	6.19896	6.05562	5.61304	5.9742	6.00275	5.93487	72482	acyl-Coenzyme A binding domain containing 6	protein_coding			GO:0000062,GO:0003674,GO:0005737,GO:0008150,GO:0008289	fatty-acyl-CoA binding|molecular_function|cytoplasm|biological_process|lipid binding			R-MMU-1430728,R-MMU-556833,R-MMU-77289,R-MMU-8978868	Metabolism|Metabolism of lipids|Mitochondrial Fatty Acid Beta-Oxidation|Fatty acid metabolism
Acbd7	15.4553	17.0455	13.8651	0.812565	-0.299446	0.667635	0.865067	Down	0.610096	0.334416	0.606032	0.297634	0.490655	0.895581	78245	acyl-Coenzyme A binding domain containing 7	protein_coding			GO:0000062,GO:0005575,GO:0006631,GO:0008289	fatty-acyl-CoA binding|cellular_component|fatty acid metabolic process|lipid binding			R-MMU-1430728,R-MMU-556833,R-MMU-77289,R-MMU-8978868	Metabolism|Metabolism of lipids|Mitochondrial Fatty Acid Beta-Oxidation|Fatty acid metabolism
Accs	120.342	96.0101	144.675	1.50636	0.591065	0.0139208	0.0962785	Up	0.739852	0.636798	0.731675	0.360423	0.449636	0.429896	329470	1-aminocyclopropane-1-carboxylate synthase (non-functional)	protein_coding			GO:0003824,GO:0005575,GO:0006520,GO:0008483,GO:0009058,GO:0030170,GO:0042802	catalytic activity|cellular_component|amino acid metabolic process|transaminase activity|biosynthetic process|pyridoxal phosphate binding|identical protein binding
Accsl	7.9723	4.95353	10.9911	2.21979	1.15042	0.20817	0.517496	Up	0.0697801	0.123875	0.137186	0.0505312	0.020505	0.0608193	381411	1-aminocyclopropane-1-carboxylate synthase (non-functional)-like	protein_coding			GO:0003824,GO:0005575,GO:0006520,GO:0008483,GO:0009058,GO:0030170	catalytic activity|cellular_component|amino acid metabolic process|transaminase activity|biosynthetic process|pyridoxal phosphate binding
Acd	467.673	459.496	475.849	1.03568	0.0505802	0.751296	0.903682	Up	10.1324	8.41343	8.49239	7.10468	7.63146	8.38351	497652	adrenocortical dysplasia	protein_coding			GO:0000723,GO:0000781,GO:0000783,GO:0001501,GO:0001655,GO:0003677,GO:0005515,GO:0005634,GO:0005654,GO:0005694,GO:0005697,GO:0006886,GO:0007004,GO:0016233,GO:0016604,GO:0030326,GO:0031848,GO:0032202,GO:0032206,GO:0032211,GO:0032212,GO:0035282,GO:0042162,GO:0044877,GO:0051973,GO:0060381,GO:0070182,GO:0070187,GO:0070198,GO:0070200	telomere maintenance|chromosome, telomeric region|nuclear telomere cap complex|skeletal system development|urogenital system development|DNA binding|protein binding|nucleus|nucleoplasm|chromosome|telomerase holoenzyme complex|intracellular protein transport|telomere maintenance via telomerase|telomere capping|nuclear body|embryonic limb morphogenesis|protection from non-homologous end joining at …			R-MMU-157579,R-MMU-1640170,R-MMU-171319,R-MMU-174411,R-MMU-174414,R-MMU-174417,R-MMU-174430,R-MMU-174437,R-MMU-180786,R-MMU-73886	Telomere Maintenance|Cell Cycle|Telomere Extension By Telomerase|Polymerase switching on the C-strand of the telomere|Processive synthesis on the C-strand of the telomere|Telomere C-strand (Lagging Strand) Synthesis|Telomere C-strand synthesis initiation|Removal of the Flap Intermediate from the C-strand|Extension of Telomeres|Chromosome Maintenance
Ace	2892.98	4351.28	1434.68	0.329699	-1.60078	8.06892e-28	8.47959e-25	Down	7.94456	7.672	9.03203	22.3399	19.1716	24.6027	11421	angiotensin I converting enzyme (peptidyl-dipeptidase A) 1	protein_coding	mmu04924,mmu04614,mmu05171,mmu05142,mmu05410,mmu05415	Renin secretion|Renin-angiotensin system|Coronavirus disease - COVID-19|Chagas disease|Hypertrophic cardiomyopathy|Diabetic cardiomyopathy	GO:0001822,GO:0002003,GO:0002446,GO:0003081,GO:0003084,GO:0003779,GO:0004175,GO:0004180,GO:0004222,GO:0005515,GO:0005516,GO:0005576,GO:0005615,GO:0005737,GO:0005764,GO:0005768,GO:0005886,GO:0006508,GO:0006518,GO:0007283,GO:0008217,GO:0008233,GO:0008237,GO:0008238,GO:0008240,GO:0008241,GO:0008270,GO:0008584,GO:0009792,GO:0009897,GO:0009925,GO:0010608,GO:0010629,GO:0010814,GO:0010815,GO:0014910,GO:…	kidney development|angiotensin maturation|neutrophil mediated immunity|regulation of systemic arterial blood pressure by renin-angiotensin|positive regulation of systemic arterial blood pressure|actin binding|endopeptidase activity|carboxypeptidase activity|metalloendopeptidase activity|protein binding|calmodulin binding|extracellular region|extracellular space|cytoplasm|lysosome|endosome|plasma …	WP396,WP4965	ACE inhibitor pathway|Deregulation of renin-angiotensin system by SARS-CoV infection	R-MMU-2022377,R-MMU-2980736,R-MMU-392499	Metabolism of Angiotensinogen to Angiotensins|Peptide hormone metabolism|Metabolism of proteins
Ace2	2928.15	4179.56	1676.75	0.401172	-1.31771	5.98492e-16	1.78359e-13	Down	13.1239	14.2084	14.5173	31.3982	36.2879	24.9021	70008	angiotensin I converting enzyme (peptidyl-dipeptidase A) 2	protein_coding	mmu04614,mmu04974,mmu05171	Renin-angiotensin system|Protein digestion and absorption|Coronavirus disease - COVID-19	GO:0001618,GO:0003051,GO:0003081,GO:0004175,GO:0004180,GO:0004181,GO:0005515,GO:0005576,GO:0005615,GO:0005737,GO:0005886,GO:0006508,GO:0008233,GO:0008237,GO:0008241,GO:0009986,GO:0015827,GO:0016020,GO:0016324,GO:0016787,GO:0022898,GO:0031526,GO:0042802,GO:0042995,GO:0046718,GO:0046813,GO:0046872,GO:0048662,GO:0051957,GO:0060452,GO:0070373,GO:0098670,GO:1903598,GO:1903779,GO:1905737,GO:2000272	virus receptor activity|angiotensin-mediated drinking behavior|regulation of systemic arterial blood pressure by renin-angiotensin|endopeptidase activity|carboxypeptidase activity|metallocarboxypeptidase activity|protein binding|extracellular region|extracellular space|cytoplasm|plasma membrane|proteolysis|peptidase activity|metallopeptidase activity|peptidyl-dipeptidase activity|cell surface|try…	WP4965	Deregulation of renin-angiotensin system by SARS-CoV infection	R-MMU-2022377,R-MMU-2980736,R-MMU-392499	Metabolism of Angiotensinogen to Angiotensins|Peptide hormone metabolism|Metabolism of proteins
Ace3	27.0697	20.903	33.2364	1.58933	0.66842	0.155478	0.443364	Up	0.221101	0.215315	0.291443	0.139067	0.133654	0.132143	217246	angiotensin I converting enzyme (peptidyl-dipeptidase A) 3	protein_coding	mmu04924,mmu04614,mmu05171,mmu05142,mmu05410,mmu05415	Renin secretion|Renin-angiotensin system|Coronavirus disease - COVID-19|Chagas disease|Hypertrophic cardiomyopathy|Diabetic cardiomyopathy	GO:0001669,GO:0003081,GO:0003084,GO:0005515,GO:0005886,GO:0006508,GO:0008237,GO:0008241,GO:0016020,GO:0031410,GO:0046872	acrosomal vesicle|regulation of systemic arterial blood pressure by renin-angiotensin|positive regulation of systemic arterial blood pressure|protein binding|plasma membrane|proteolysis|metallopeptidase activity|peptidyl-dipeptidase activity|membrane|cytoplasmic vesicle|metal ion binding
Acer1	4.49523	8.99046	0	0.0176805	-5.8217	0.0387965	0.192778	Down	0	0	0	0	0.305422	0	171168	alkaline ceramidase 1	protein_coding	mmu00600,mmu04071	Sphingolipid metabolism|Sphingolipid signaling pathway	GO:0005783,GO:0006629,GO:0006665,GO:0006672,GO:0010446,GO:0016020,GO:0016787,GO:0016811,GO:0017040,GO:0019216,GO:0030148,GO:0030154,GO:0046512,GO:0046514,GO:0046872,GO:0048733,GO:0071277,GO:0071633,GO:0102121	endoplasmic reticulum|lipid metabolic process|sphingolipid metabolic process|ceramide metabolic process|response to alkaline pH|membrane|hydrolase activity|hydrolase activity, acting on carbon-nitrogen (but not peptide) bonds, in linear amides|N-acylsphingosine amidohydrolase activity|regulation of lipid metabolic process|sphingolipid biosynthetic process|cell differentiation|sphingosine biosynth…			R-MMU-1430728,R-MMU-1660661,R-MMU-428157,R-MMU-556833	Metabolism|Sphingolipid de novo biosynthesis|Sphingolipid metabolism|Metabolism of lipids
Acer2	3392.63	4724.29	2060.96	0.436247	-1.19678	1.52576e-12	2.72008e-10	Down	10.1039	7.68042	8.83757	17.6162	21.6431	14.7703	230379	alkaline ceramidase 2	protein_coding	mmu00600,mmu04071	Sphingolipid metabolism|Sphingolipid signaling pathway	GO:0000139,GO:0001953,GO:0005794,GO:0006629,GO:0006665,GO:0006672,GO:0006919,GO:0006974,GO:0008284,GO:0010506,GO:0016020,GO:0016787,GO:0016811,GO:0017040,GO:0030330,GO:0032526,GO:0033629,GO:0042981,GO:0046512,GO:0046514,GO:0046872,GO:0060049,GO:0071633,GO:0102121	Golgi membrane|negative regulation of cell-matrix adhesion|Golgi apparatus|lipid metabolic process|sphingolipid metabolic process|ceramide metabolic process|activation of cysteine-type endopeptidase activity involved in apoptotic process|DNA damage response|positive regulation of cell population proliferation|regulation of autophagy|membrane|hydrolase activity|hydrolase activity, acting on carbon…			R-MMU-1430728,R-MMU-1660661,R-MMU-428157,R-MMU-556833	Metabolism|Sphingolipid de novo biosynthesis|Sphingolipid metabolism|Metabolism of lipids
Acer3	813.85	907.627	720.073	0.793402	-0.333875	0.058557	0.248609	Down	6.3746	4.349	4.90154	5.68422	6.44964	5.28003	66190	alkaline ceramidase 3	protein_coding	mmu00600	Sphingolipid metabolism	GO:0000139,GO:0005509,GO:0005783,GO:0005789,GO:0005794,GO:0006629,GO:0006665,GO:0006672,GO:0006954,GO:0008270,GO:0008284,GO:0016020,GO:0016787,GO:0016811,GO:0017040,GO:0042552,GO:0043067,GO:0046512,GO:0046514,GO:0046872,GO:0070774,GO:0071602,GO:0071633,GO:0102121	Golgi membrane|calcium ion binding|endoplasmic reticulum|endoplasmic reticulum membrane|Golgi apparatus|lipid metabolic process|sphingolipid metabolic process|ceramide metabolic process|inflammatory response|zinc ion binding|positive regulation of cell population proliferation|membrane|hydrolase activity|hydrolase activity, acting on carbon-nitrogen (but not peptide) bonds, in linear amides|N-acy…			R-MMU-1430728,R-MMU-1660661,R-MMU-428157,R-MMU-556833	Metabolism|Sphingolipid de novo biosynthesis|Sphingolipid metabolism|Metabolism of lipids
Ache	79.652	125.175	34.1292	0.272441	-1.87598	7.8525e-07	3.46882e-05	Down	0.244582	0.15989	0.28698	0.910871	0.814535	0.507557	11423	acetylcholinesterase	protein_coding	mmu00564,mmu04725	Glycerophospholipid metabolism|Cholinergic synapse	GO:0001919,GO:0003990,GO:0004104,GO:0005515,GO:0005518,GO:0005576,GO:0005604,GO:0005615,GO:0005635,GO:0005788,GO:0005794,GO:0005886,GO:0006581,GO:0007155,GO:0007416,GO:0008291,GO:0009986,GO:0016020,GO:0016787,GO:0017171,GO:0019695,GO:0030424,GO:0030425,GO:0031594,GO:0031623,GO:0032868,GO:0033265,GO:0042135,GO:0042166,GO:0042734,GO:0042802,GO:0042803,GO:0043025,GO:0043083,GO:0043236,GO:0043621,GO:…	regulation of receptor recycling|acetylcholinesterase activity|cholinesterase activity|protein binding|collagen binding|extracellular region|basement membrane|extracellular space|nuclear envelope|endoplasmic reticulum lumen|Golgi apparatus|plasma membrane|acetylcholine catabolic process|cell adhesion|synapse assembly|acetylcholine metabolic process|cell surface|membrane|hydrolase activity|serine …	WP522,WP175	Biogenic amine synthesis|Acetylcholine synthesis
Acin1	3691.13	3399.25	3983	1.17167	0.228571	0.0547999	0.239167	Up	24.2635	21.8358	25.0088	16.0081	20.0363	17.7563	56215	apoptotic chromatin condensation inducer 1	protein_coding	mmu03040,mmu03013,mmu03015	Spliceosome|Nucleocytoplasmic transport|mRNA surveillance pathway	GO:0003676,GO:0005634,GO:0005654,GO:0005730,GO:0005829,GO:0005886,GO:0006397,GO:0006915,GO:0008380,GO:0016607,GO:0030263,GO:0035145,GO:0043065,GO:0048025,GO:0061574	nucleic acid binding|nucleus|nucleoplasm|nucleolus|cytosol|plasma membrane|mRNA processing|apoptotic process|RNA splicing|nuclear speck|apoptotic chromosome condensation|exon-exon junction complex|positive regulation of apoptotic process|negative regulation of mRNA splicing, via spliceosome|ASAP complex	WP310	mRNA processing	R-MMU-109581,R-MMU-111465,R-MMU-5357801,R-MMU-72163,R-MMU-72172,R-MMU-72203,R-MMU-75153,R-MMU-8953854	Apoptosis|Apoptotic cleavage of cellular proteins|Programmed Cell Death|mRNA Splicing - Major Pathway|mRNA Splicing|Processing of Capped Intron-Containing Pre-mRNA|Apoptotic execution phase|Metabolism of RNA
Ackr1	2.93084	4.14796	1.71371	0.413661	-1.27348	0.374049	0.683379	Down	0.0678376	0.0428182	0.0237098	0.0261998	0.159473	0.105113	13349	atypical chemokine receptor 1 (Duffy blood group)	protein_coding	mmu05144	Malaria	GO:0004930,GO:0005768,GO:0006954,GO:0007165,GO:0007186,GO:0016020,GO:0019956,GO:0019957,GO:0032642,GO:0070098	G protein-coupled receptor activity|endosome|inflammatory response|signal transduction|G protein-coupled receptor signaling pathway|membrane|chemokine binding|C-C chemokine binding|regulation of chemokine production|chemokine-mediated signaling pathway	WP1396,WP41	GPCRs, non-odorant |GPCRs, other
Ackr2	307.952	268.403	347.5	1.2948	0.372726	0.207304	0.516645	Up	2.60331	4.08177	3.24252	2.64166	2.70912	1.47413	59289	atypical chemokine receptor 2	protein_coding			GO:0004930,GO:0004950,GO:0005044,GO:0005515,GO:0005654,GO:0005768,GO:0005829,GO:0005884,GO:0005886,GO:0006935,GO:0006954,GO:0006955,GO:0007165,GO:0007186,GO:0007204,GO:0009897,GO:0016020,GO:0016493,GO:0019722,GO:0019957,GO:0031965,GO:0043231,GO:0060326	G protein-coupled receptor activity|chemokine receptor activity|scavenger receptor activity|protein binding|nucleoplasm|endosome|cytosol|actin filament|plasma membrane|chemotaxis|inflammatory response|immune response|signal transduction|G protein-coupled receptor signaling pathway|positive regulation of cytosolic calcium ion concentration|external side of plasma membrane|membrane|C-C chemokine re…	WP1396,WP189	GPCRs, non-odorant |GPCRs, class A rhodopsin-like	R-MMU-162582,R-MMU-372790,R-MMU-373076,R-MMU-375276,R-MMU-380108,R-MMU-500792	Signal Transduction|Signaling by GPCR|Class A/1 (Rhodopsin-like receptors)|Peptide ligand-binding receptors|Chemokine receptors bind chemokines|GPCR ligand binding
Ackr3	1082.5	1027.08	1137.92	1.10803	0.147992	0.340544	0.654126	Up	15.1903	14.7983	14.4257	12.3083	10.0475	13.1185	12778	atypical chemokine receptor 3	protein_coding	mmu04060,mmu04061	Cytokine-cytokine receptor interaction|Viral protein interaction with cytokine and cytokine receptor	GO:0001525,GO:0001570,GO:0004930,GO:0005044,GO:0005768,GO:0005886,GO:0005905,GO:0006935,GO:0006955,GO:0007155,GO:0007165,GO:0007186,GO:0007204,GO:0007275,GO:0008285,GO:0009897,GO:0009986,GO:0015026,GO:0016020,GO:0016493,GO:0016494,GO:0019722,GO:0019956,GO:0019957,GO:0019958,GO:0021557,GO:0031623,GO:0043231,GO:0060326,GO:0070098,GO:0070374,GO:1902230,GO:1905322	angiogenesis|vasculogenesis|G protein-coupled receptor activity|scavenger receptor activity|endosome|plasma membrane|clathrin-coated pit|chemotaxis|immune response|cell adhesion|signal transduction|G protein-coupled receptor signaling pathway|positive regulation of cytosolic calcium ion concentration|multicellular organism development|negative regulation of cell population proliferation|external …	WP1396,WP385,WP189	GPCRs, non-odorant |Myometrial relaxation and contraction pathways|GPCRs, class A rhodopsin-like	R-MMU-162582,R-MMU-372790,R-MMU-373076,R-MMU-375276,R-MMU-380108,R-MMU-388396,R-MMU-418594,R-MMU-500792	Signal Transduction|Signaling by GPCR|Class A/1 (Rhodopsin-like receptors)|Peptide ligand-binding receptors|Chemokine receptors bind chemokines|GPCR downstream signalling|G alpha (i) signalling events|GPCR ligand binding
Ackr4	94.4191	101.375	87.463	0.862882	-0.212765	0.434245	0.728258	Down	1.08814	0.911709	0.918812	0.970677	1.1545	0.872872	252837	atypical chemokine receptor 4	protein_coding	mmu04060,mmu04061	Cytokine-cytokine receptor interaction|Viral protein interaction with cytokine and cytokine receptor	GO:0004930,GO:0004950,GO:0005044,GO:0005768,GO:0005886,GO:0006935,GO:0006955,GO:0007165,GO:0007186,GO:0007204,GO:0009897,GO:0016020,GO:0016493,GO:0019722,GO:0019956,GO:0019957,GO:0060326	G protein-coupled receptor activity|chemokine receptor activity|scavenger receptor activity|endosome|plasma membrane|chemotaxis|immune response|signal transduction|G protein-coupled receptor signaling pathway|positive regulation of cytosolic calcium ion concentration|external side of plasma membrane|membrane|C-C chemokine receptor activity|calcium-mediated signaling|chemokine binding|C-C chemokin…			R-MMU-162582,R-MMU-372790,R-MMU-373076,R-MMU-375276,R-MMU-380108,R-MMU-500792	Signal Transduction|Signaling by GPCR|Class A/1 (Rhodopsin-like receptors)|Peptide ligand-binding receptors|Chemokine receptors bind chemokines|GPCR ligand binding
Acly	6456.87	6590.39	6323.35	0.959484	-0.0596694	0.640523	0.850554	Down	22.1208	25.7901	25.3193	23.6931	22.3073	21.6813	104112	ATP citrate lyase	protein_coding	mmu00020	Citrate cycle (TCA cycle)	GO:0000166,GO:0003824,GO:0003878,GO:0005515,GO:0005524,GO:0005654,GO:0005737,GO:0005739,GO:0005829,GO:0006084,GO:0006085,GO:0006099,GO:0006101,GO:0006107,GO:0006629,GO:0006633,GO:0008610,GO:0016740,GO:0046872,GO:0046912	nucleotide binding|catalytic activity|ATP citrate synthase activity|protein binding|ATP binding|nucleoplasm|cytoplasm|mitochondrion|cytosol|acetyl-CoA metabolic process|acetyl-CoA biosynthetic process|tricarboxylic acid cycle|citrate metabolic process|oxaloacetate metabolic process|lipid metabolic process|fatty acid biosynthetic process|lipid biosynthetic process|transferase activity|metal ion bi…	WP336,WP662	Fatty acid biosynthesis|Amino acid metabolism	R-MMU-1430728,R-MMU-168249,R-MMU-168256,R-MMU-556833,R-MMU-6798695,R-MMU-75105,R-MMU-8978868	Metabolism|Innate Immune System|Immune System|Metabolism of lipids|Neutrophil degranulation|Fatty acyl-CoA biosynthesis|Fatty acid metabolism
Acmsd	12.2865	12.105	12.4679	1.02783	0.0396069	0.958227	0.987553	Up	0.0964724	0.127873	0.192192	0.0558883	0.136073	0.168168	266645	amino carboxymuconate semialdehyde decarboxylase	protein_coding	mmu00380	Tryptophan metabolism	GO:0001760,GO:0005737,GO:0005829,GO:0006569,GO:0008270,GO:0016787,GO:0016829,GO:0016831,GO:0019748,GO:0046872,GO:0046874,GO:1904985	aminocarboxymuconate-semialdehyde decarboxylase activity|cytoplasm|cytosol|tryptophan catabolic process|zinc ion binding|hydrolase activity|lyase activity|carboxy-lyase activity|secondary metabolic process|metal ion binding|quinolinate metabolic process|negative regulation of quinolinate biosynthetic process	WP79	Tryptophan metabolism
Acnat1	692.52	838.494	546.546	0.6518	-0.617498	0.587848	0.822218	Down	0.214009	2.72757	4.82014	3.03273	1.53347	5.98799	230161	acyl-coenzyme A amino acid N-acyltransferase 1	protein_coding	mmu00120,mmu01040,mmu00430,mmu04146,mmu04976	Primary bile acid biosynthesis|Biosynthesis of unsaturated fatty acids|Taurine and hypotaurine metabolism|Peroxisome|Bile secretion	GO:0005777,GO:0006629,GO:0006631,GO:0006637,GO:0016410,GO:0016740,GO:0016746,GO:0016790,GO:0047617	peroxisome|lipid metabolic process|fatty acid metabolic process|acyl-CoA metabolic process|N-acyltransferase activity|transferase activity|acyltransferase activity|thiolester hydrolase activity|acyl-CoA hydrolase activity
Acnat2	9.49696	14.4001	4.5938	0.319092	-1.64795	0.269956	0.588515	Down	0	0.0982847	0.0362822	0.0300694	0.0101682	0.341809	209186	acyl-coenzyme A amino acid N-acyltransferase 2	protein_coding	mmu00120,mmu01040,mmu00430,mmu04146,mmu04976	Primary bile acid biosynthesis|Biosynthesis of unsaturated fatty acids|Taurine and hypotaurine metabolism|Peroxisome|Bile secretion	GO:0005777,GO:0006629,GO:0006631,GO:0006637,GO:0016740,GO:0016746,GO:0016790,GO:0047617	peroxisome|lipid metabolic process|fatty acid metabolic process|acyl-CoA metabolic process|transferase activity|acyltransferase activity|thiolester hydrolase activity|acyl-CoA hydrolase activity
Aco1	5138.38	4824.08	5452.68	1.13035	0.176768	0.249549	0.566221	Up	44.308	35.5261	32.9242	32.2541	27.8251	28.1068	11428	aconitase 1	protein_coding	mmu00020,mmu00630	Citrate cycle (TCA cycle)|Glyoxylate and dicarboxylate metabolism	GO:0003723,GO:0003994,GO:0005737,GO:0005739,GO:0005783,GO:0005794,GO:0005829,GO:0006099,GO:0006101,GO:0006417,GO:0006879,GO:0009791,GO:0010040,GO:0010468,GO:0016829,GO:0030350,GO:0046872,GO:0047780,GO:0048027,GO:0050892,GO:0051536,GO:0051538,GO:0051539	RNA binding|aconitate hydratase activity|cytoplasm|mitochondrion|endoplasmic reticulum|Golgi apparatus|cytosol|tricarboxylic acid cycle|citrate metabolic process|regulation of translation|intracellular iron ion homeostasis|post-embryonic development|response to iron(II) ion|regulation of gene expression|lyase activity|iron-responsive element binding|metal ion binding|citrate dehydratase activity|…	WP310	mRNA processing	R-MMU-382551,R-MMU-917937	Transport of small molecules|Iron uptake and transport
Aco2	5752.87	5135	6370.74	1.24065	0.311102	0.00913307	0.0713237	Up	64.2638	74.6784	70.2511	49.184	50.9009	49.5855	11429	aconitase 2%2C mitochondrial	protein_coding	mmu00020,mmu00630	Citrate cycle (TCA cycle)|Glyoxylate and dicarboxylate metabolism	GO:0003994,GO:0005506,GO:0005739,GO:0005759,GO:0005829,GO:0006099,GO:0006101,GO:0006102,GO:0016829,GO:0043209,GO:0046872,GO:0047780,GO:0051536,GO:0051538,GO:0051539	aconitate hydratase activity|iron ion binding|mitochondrion|mitochondrial matrix|cytosol|tricarboxylic acid cycle|citrate metabolic process|isocitrate metabolic process|lyase activity|myelin sheath|metal ion binding|citrate dehydratase activity|iron-sulfur cluster binding|3 iron, 4 sulfur cluster binding|4 iron, 4 sulfur cluster binding	WP434,WP662	TCA cycle|Amino acid metabolism	R-MMU-1428517,R-MMU-1430728,R-MMU-71403,R-MMU-71406	The citric acid (TCA) cycle and respiratory electron transport|Metabolism|Citric acid cycle (TCA cycle)|Pyruvate metabolism and Citric Acid (TCA) cycle
Acod1	7.34716	1.50219	13.1921	8.72914	3.12584	0.00760461	0.0627013	Up	0.172748	0.173175	0.117202	0	0.0358322	0.011809	16365	aconitate decarboxylase 1	protein_coding			GO:0002376,GO:0002760,GO:0005739,GO:0006952,GO:0006954,GO:0007566,GO:0009617,GO:0016829,GO:0032088,GO:0032480,GO:0032496,GO:0034136,GO:0034144,GO:0035458,GO:0042803,GO:0045087,GO:0045824,GO:0047613,GO:0050728,GO:0051607,GO:0071219,GO:0071222,GO:0071346,GO:0071347,GO:0071356,GO:0071393,GO:0072573,GO:2000379	immune system process|positive regulation of antimicrobial humoral response|mitochondrion|defense response|inflammatory response|embryo implantation|response to bacterium|lyase activity|negative regulation of NF-kappaB transcription factor activity|negative regulation of type I interferon production|response to lipopolysaccharide|negative regulation of toll-like receptor 2 signaling pathway|negat…
Acot1	303.236	270.831	335.642	1.23901	0.309194	0.355871	0.666491	Up	3.81233	6.54811	9.21507	4.12395	3.84656	6.03785	26897	acyl-CoA thioesterase 1	protein_coding	mmu00062,mmu01040,mmu04913	Fatty acid elongation|Biosynthesis of unsaturated fatty acids|Ovarian steroidogenesis	GO:0000038,GO:0001676,GO:0005737,GO:0005739,GO:0005829,GO:0006629,GO:0006631,GO:0006637,GO:0010667,GO:0016290,GO:0016787,GO:0016790,GO:0047617,GO:0052689,GO:0102991	very long-chain fatty acid metabolic process|long-chain fatty acid metabolic process|cytoplasm|mitochondrion|cytosol|lipid metabolic process|fatty acid metabolic process|acyl-CoA metabolic process|negative regulation of cardiac muscle cell apoptotic process|palmitoyl-CoA hydrolase activity|hydrolase activity|thiolester hydrolase activity|acyl-CoA hydrolase activity|carboxylic ester hydrolase acti…	WP4350,WP4351,WP4346	Omega-3 / omega-6 fatty acid synthesis|Omega-9 fatty acid synthesis|Cholesterol metabolism with Bloch and Kandutsch-Russell pathways	R-MMU-1430728,R-MMU-556833,R-MMU-77289,R-MMU-8978868,R-MMU-9033241,R-MMU-9609507	Metabolism|Metabolism of lipids|Mitochondrial Fatty Acid Beta-Oxidation|Fatty acid metabolism|Peroxisomal protein import|Protein localization
Acot10	1.5835	1.13979	2.0272	1.77705	0.829487	0.675196	0.869056	Up	0.0684408	0	0.0538213	0.0198245	0.0201114	0.019884	64833	acyl-CoA thioesterase 10	protein_coding			GO:0005739,GO:0006637,GO:0016787,GO:0047617,GO:0052689	mitochondrion|acyl-CoA metabolic process|hydrolase activity|acyl-CoA hydrolase activity|carboxylic ester hydrolase activity
Acot11	132.382	120.917	143.847	1.18913	0.249907	0.449296	0.73958	Up	0.487836	0.703403	1.03709	0.580782	0.489236	0.587725	329910	acyl-CoA thioesterase 11	protein_coding			GO:0005737,GO:0005739,GO:0005759,GO:0005829,GO:0006629,GO:0006631,GO:0006637,GO:0008289,GO:0009266,GO:0009409,GO:0016290,GO:0016787,GO:0016790,GO:0035556,GO:0047617,GO:0052689,GO:0052816,GO:0102991,GO:0120163	cytoplasm|mitochondrion|mitochondrial matrix|cytosol|lipid metabolic process|fatty acid metabolic process|acyl-CoA metabolic process|lipid binding|response to temperature stimulus|response to cold|palmitoyl-CoA hydrolase activity|hydrolase activity|thiolester hydrolase activity|intracellular signal transduction|acyl-CoA hydrolase activity|carboxylic ester hydrolase activity|long-chain acyl-CoA hy…			R-MMU-1430728,R-MMU-556833,R-MMU-77289,R-MMU-8978868	Metabolism|Metabolism of lipids|Mitochondrial Fatty Acid Beta-Oxidation|Fatty acid metabolism
Acot12	23.8224	11.3613	36.2835	3.19017	1.67363	0.118655	0.379374	Up	0.00859986	0.227981	0.847613	0.0697489	0.131408	0.0999402	74156	acyl-CoA thioesterase 12	protein_coding	mmu00620	Pyruvate metabolism	GO:0003986,GO:0005524,GO:0005654,GO:0005737,GO:0005829,GO:0006084,GO:0006629,GO:0006631,GO:0006637,GO:0008289,GO:0016787,GO:0016790,GO:0042802,GO:0045171,GO:0047617,GO:0052689	acetyl-CoA hydrolase activity|ATP binding|nucleoplasm|cytoplasm|cytosol|acetyl-CoA metabolic process|lipid metabolic process|fatty acid metabolic process|acyl-CoA metabolic process|lipid binding|hydrolase activity|thiolester hydrolase activity|identical protein binding|intercellular bridge|acyl-CoA hydrolase activity|carboxylic ester hydrolase activity			R-MMU-1430728,R-MMU-556833,R-MMU-77289,R-MMU-8978868	Metabolism|Metabolism of lipids|Mitochondrial Fatty Acid Beta-Oxidation|Fatty acid metabolism
Acot13	358.182	301.033	415.332	1.3794	0.464044	0.110508	0.365378	Up	11.1174	20.3618	23.4745	10.3048	11.6706	13.4543	66834	acyl-CoA thioesterase 13	protein_coding			GO:0005634,GO:0005737,GO:0005739,GO:0005759,GO:0005856,GO:0006629,GO:0016290,GO:0016787,GO:0047617,GO:0051289,GO:0102991,GO:0120163	nucleus|cytoplasm|mitochondrion|mitochondrial matrix|cytoskeleton|lipid metabolic process|palmitoyl-CoA hydrolase activity|hydrolase activity|acyl-CoA hydrolase activity|protein homotetramerization|myristoyl-CoA hydrolase activity|negative regulation of cold-induced thermogenesis			R-MMU-1430728,R-MMU-556833,R-MMU-77289,R-MMU-8978868	Metabolism|Metabolism of lipids|Mitochondrial Fatty Acid Beta-Oxidation|Fatty acid metabolism
Acot2	523.605	563.452	483.757	0.85856	-0.220009	0.151465	0.437228	Down	7.42331	5.77199	6.86855	6.75887	6.68808	7.20978	171210	acyl-CoA thioesterase 2	protein_coding	mmu00062,mmu01040,mmu04913	Fatty acid elongation|Biosynthesis of unsaturated fatty acids|Ovarian steroidogenesis	GO:0000038,GO:0001666,GO:0001676,GO:0005739,GO:0006629,GO:0006631,GO:0006637,GO:0016290,GO:0016787,GO:0016790,GO:0042760,GO:0047617,GO:0052689,GO:0102991	very long-chain fatty acid metabolic process|response to hypoxia|long-chain fatty acid metabolic process|mitochondrion|lipid metabolic process|fatty acid metabolic process|acyl-CoA metabolic process|palmitoyl-CoA hydrolase activity|hydrolase activity|thiolester hydrolase activity|very long-chain fatty acid catabolic process|acyl-CoA hydrolase activity|carboxylic ester hydrolase activity|myristoyl…	WP4350,WP4351,WP4346	Omega-3 / omega-6 fatty acid synthesis|Omega-9 fatty acid synthesis|Cholesterol metabolism with Bloch and Kandutsch-Russell pathways	R-MMU-1430728,R-MMU-556833,R-MMU-77289,R-MMU-8978868,R-MMU-9033241,R-MMU-9609507	Metabolism|Metabolism of lipids|Mitochondrial Fatty Acid Beta-Oxidation|Fatty acid metabolism|Peroxisomal protein import|Protein localization
Acot3	2.89845	3.79861	1.99829	0.527057	-0.923969	0.583457	0.819872	Down	0	0.0434787	0.00802516	0.0354718	0.0449815	0.00889456	171281	acyl-CoA thioesterase 3	protein_coding	mmu00062,mmu01040,mmu04913	Fatty acid elongation|Biosynthesis of unsaturated fatty acids|Ovarian steroidogenesis	GO:0000038,GO:0001676,GO:0005777,GO:0005829,GO:0006629,GO:0006631,GO:0006637,GO:0016290,GO:0016787,GO:0016790,GO:0032788,GO:0032789,GO:0047617,GO:0052689,GO:0102991	very long-chain fatty acid metabolic process|long-chain fatty acid metabolic process|peroxisome|cytosol|lipid metabolic process|fatty acid metabolic process|acyl-CoA metabolic process|palmitoyl-CoA hydrolase activity|hydrolase activity|thiolester hydrolase activity|saturated monocarboxylic acid metabolic process|unsaturated monocarboxylic acid metabolic process|acyl-CoA hydrolase activity|carboxy…			R-MMU-1430728,R-MMU-556833,R-MMU-77289,R-MMU-8978868,R-MMU-9033241,R-MMU-9609507	Metabolism|Metabolism of lipids|Mitochondrial Fatty Acid Beta-Oxidation|Fatty acid metabolism|Peroxisomal protein import|Protein localization
Acot4	82.1434	69.7699	94.5168	1.35445	0.437705	0.515351	0.783106	Up	0.146723	0.820258	1.31133	0.60714	0.229946	0.649558	171282	acyl-CoA thioesterase 4	protein_coding	mmu00062,mmu01040,mmu04913	Fatty acid elongation|Biosynthesis of unsaturated fatty acids|Ovarian steroidogenesis	GO:0000038,GO:0001676,GO:0004778,GO:0005777,GO:0006104,GO:0006629,GO:0006631,GO:0006637,GO:0016787,GO:0016790,GO:0032788,GO:0032789,GO:0043648,GO:0043649,GO:0044466,GO:0046459,GO:0047617,GO:0052689	very long-chain fatty acid metabolic process|long-chain fatty acid metabolic process|succinyl-CoA hydrolase activity|peroxisome|succinyl-CoA metabolic process|lipid metabolic process|fatty acid metabolic process|acyl-CoA metabolic process|hydrolase activity|thiolester hydrolase activity|saturated monocarboxylic acid metabolic process|unsaturated monocarboxylic acid metabolic process|dicarboxylic …			R-MMU-1430728,R-MMU-390247,R-MMU-390918,R-MMU-556833,R-MMU-8978868,R-MMU-9033241,R-MMU-9609507	Metabolism|Beta-oxidation of very long chain fatty acids|Peroxisomal lipid metabolism|Metabolism of lipids|Fatty acid metabolism|Peroxisomal protein import|Protein localization
Acot6	51.721	57.8716	45.5703	0.78754	-0.344575	0.465915	0.750881	Down	0.288377	0.515723	0.453555	0.510468	0.263636	0.642326	217700	acyl-CoA thioesterase 6	protein_coding			GO:0005777,GO:0005829,GO:0006629,GO:0006631,GO:0006637,GO:0016787,GO:0016790,GO:0047617,GO:0052689	peroxisome|cytosol|lipid metabolic process|fatty acid metabolic process|acyl-CoA metabolic process|hydrolase activity|thiolester hydrolase activity|acyl-CoA hydrolase activity|carboxylic ester hydrolase activity			R-MMU-1430728,R-MMU-390247,R-MMU-390918,R-MMU-556833,R-MMU-8978868	Metabolism|Beta-oxidation of very long chain fatty acids|Peroxisomal lipid metabolism|Metabolism of lipids|Fatty acid metabolism
Acot7	449.91	304.462	595.358	1.95514	0.967269	7.72676e-10	7.80848e-08	Up	4.62353	4.23466	4.66909	1.80846	2.05047	2.27117	70025	acyl-CoA thioesterase 7	protein_coding	mmu00062,mmu01040	Fatty acid elongation|Biosynthesis of unsaturated fatty acids	GO:0000062,GO:0005654,GO:0005737,GO:0005759,GO:0005829,GO:0006629,GO:0006631,GO:0006637,GO:0009062,GO:0015937,GO:0016290,GO:0016787,GO:0016790,GO:0036042,GO:0036114,GO:0036116,GO:0042802,GO:0042803,GO:0043005,GO:0043025,GO:0047617,GO:0051792,GO:0052689,GO:0102991,GO:1900535	fatty-acyl-CoA binding|nucleoplasm|cytoplasm|mitochondrial matrix|cytosol|lipid metabolic process|fatty acid metabolic process|acyl-CoA metabolic process|fatty acid catabolic process|coenzyme A biosynthetic process|palmitoyl-CoA hydrolase activity|hydrolase activity|thiolester hydrolase activity|long-chain fatty acyl-CoA binding|medium-chain fatty-acyl-CoA catabolic process|long-chain fatty-acyl-…			R-MMU-1430728,R-MMU-556833,R-MMU-77289,R-MMU-8978868	Metabolism|Metabolism of lipids|Mitochondrial Fatty Acid Beta-Oxidation|Fatty acid metabolism
Acot8	391.521	389.243	393.798	1.0119	0.017068	0.913644	0.970626	Up	3.91559	3.4424	3.54421	3.27757	2.98687	3.26883	170789	acyl-CoA thioesterase 8	protein_coding	mmu00120,mmu04146	Primary bile acid biosynthesis|Peroxisome	GO:0003986,GO:0004778,GO:0005739,GO:0005777,GO:0005782,GO:0006629,GO:0006631,GO:0006637,GO:0007031,GO:0009062,GO:0016290,GO:0016559,GO:0016787,GO:0033882,GO:0043649,GO:0044466,GO:0045225,GO:0047603,GO:0047617,GO:0047994,GO:0052689,GO:0052815,GO:0102991	acetyl-CoA hydrolase activity|succinyl-CoA hydrolase activity|mitochondrion|peroxisome|peroxisomal matrix|lipid metabolic process|fatty acid metabolic process|acyl-CoA metabolic process|peroxisome organization|fatty acid catabolic process|palmitoyl-CoA hydrolase activity|peroxisome fission|hydrolase activity|choloyl-CoA hydrolase activity|dicarboxylic acid catabolic process|glutaryl-CoA hydrolase…			R-MMU-1430728,R-MMU-192105,R-MMU-193368,R-MMU-194068,R-MMU-2046104,R-MMU-2046106,R-MMU-389887,R-MMU-390247,R-MMU-390918,R-MMU-556833,R-MMU-8957322,R-MMU-8978868,R-MMU-9033241,R-MMU-9609507	Metabolism|Synthesis of bile acids and bile salts|Synthesis of bile acids and bile salts via 7alpha-hydroxycholesterol|Bile acid and bile salt metabolism|alpha-linolenic (omega3) and linoleic (omega6) acid metabolism|alpha-linolenic acid (ALA) metabolism|Beta-oxidation of pristanoyl-CoA|Beta-oxidation of very long chain fatty acids|Peroxisomal lipid metabolism|Metabolism of lipids|Metabolism of s…
Acot9	2498.57	2475.76	2521.38	1.01846	0.0263877	0.868548	0.954027	Up	49.4944	37.4425	37.4971	32.9271	34.2566	40.9143	56360	acyl-CoA thioesterase 9	protein_coding			GO:0001676,GO:0003986,GO:0005515,GO:0005739,GO:0005759,GO:0006637,GO:0016290,GO:0016787,GO:0046459,GO:0047617,GO:0052689,GO:0102991	long-chain fatty acid metabolic process|acetyl-CoA hydrolase activity|protein binding|mitochondrion|mitochondrial matrix|acyl-CoA metabolic process|palmitoyl-CoA hydrolase activity|hydrolase activity|short-chain fatty acid metabolic process|acyl-CoA hydrolase activity|carboxylic ester hydrolase activity|myristoyl-CoA hydrolase activity			R-MMU-1430728,R-MMU-556833,R-MMU-77289,R-MMU-8978868	Metabolism|Metabolism of lipids|Mitochondrial Fatty Acid Beta-Oxidation|Fatty acid metabolism
Acox1	5470.91	5759.78	5182.04	0.899693	-0.152495	0.169699	0.464789	Down	40.1047	40.0484	41.3617	38.0526	38.1096	43.5201	11430	acyl-Coenzyme A oxidase 1%2C palmitoyl	protein_coding	mmu00640,mmu00071,mmu00592,mmu01040,mmu00410,mmu04024,mmu04146,mmu03320,mmu04936	Propanoate metabolism|Fatty acid degradation|alpha-Linolenic acid metabolism|Biosynthesis of unsaturated fatty acids|beta-Alanine metabolism|cAMP signaling pathway|Peroxisome|PPAR signaling pathway|Alcoholic liver disease	GO:0000038,GO:0003997,GO:0005504,GO:0005737,GO:0005739,GO:0005777,GO:0005778,GO:0005829,GO:0006091,GO:0006629,GO:0006631,GO:0006635,GO:0006693,GO:0007283,GO:0009062,GO:0016401,GO:0016491,GO:0016559,GO:0016627,GO:0019395,GO:0030165,GO:0033540,GO:0042632,GO:0042803,GO:0050660,GO:0050665,GO:0055088,GO:0071949,GO:0140493	very long-chain fatty acid metabolic process|acyl-CoA oxidase activity|fatty acid binding|cytoplasm|mitochondrion|peroxisome|peroxisomal membrane|cytosol|generation of precursor metabolites and energy|lipid metabolic process|fatty acid metabolic process|fatty acid beta-oxidation|prostaglandin metabolic process|spermatogenesis|fatty acid catabolic process|palmitoyl-CoA oxidase activity|oxidoreduct…	WP4350,WP4347,WP4348,WP2316	Omega-3 / omega-6 fatty acid synthesis|Eicosanoid metabolism via cyclooxygenases (COX)|Eicosanoid metabolism via lipoxygenases (LOX)|PPAR signaling pathway	R-MMU-1430728,R-MMU-2046104,R-MMU-2046106,R-MMU-390247,R-MMU-390918,R-MMU-556833,R-MMU-8978868,R-MMU-9033241,R-MMU-9609507	Metabolism|alpha-linolenic (omega3) and linoleic (omega6) acid metabolism|alpha-linolenic acid (ALA) metabolism|Beta-oxidation of very long chain fatty acids|Peroxisomal lipid metabolism|Metabolism of lipids|Fatty acid metabolism|Peroxisomal protein import|Protein localization
Acox2	869.228	1042.98	695.474	0.666798	-0.584678	0.560143	0.809406	Down	0.907958	7.92862	10.5657	6.69708	4.24982	14.9417	93732	acyl-Coenzyme A oxidase 2%2C branched chain	protein_coding	mmu00120,mmu04146,mmu03320	Primary bile acid biosynthesis|Peroxisome|PPAR signaling pathway	GO:0000038,GO:0003997,GO:0005504,GO:0005777,GO:0005829,GO:0006629,GO:0006631,GO:0006635,GO:0006699,GO:0016401,GO:0016491,GO:0016627,GO:0033540,GO:0033791,GO:0043231,GO:0050660,GO:0055088,GO:0071949	very long-chain fatty acid metabolic process|acyl-CoA oxidase activity|fatty acid binding|peroxisome|cytosol|lipid metabolic process|fatty acid metabolic process|fatty acid beta-oxidation|bile acid biosynthetic process|palmitoyl-CoA oxidase activity|oxidoreductase activity|oxidoreductase activity, acting on the CH-CH group of donors|fatty acid beta-oxidation using acyl-CoA oxidase|3alpha,7alpha,1…	WP4347,WP4348,WP2316	Eicosanoid metabolism via cyclooxygenases (COX)|Eicosanoid metabolism via lipoxygenases (LOX)|PPAR signaling pathway	R-MMU-1430728,R-MMU-192105,R-MMU-193368,R-MMU-194068,R-MMU-389887,R-MMU-390918,R-MMU-556833,R-MMU-8957322,R-MMU-8978868,R-MMU-9033241,R-MMU-9609507	Metabolism|Synthesis of bile acids and bile salts|Synthesis of bile acids and bile salts via 7alpha-hydroxycholesterol|Bile acid and bile salt metabolism|Beta-oxidation of pristanoyl-CoA|Peroxisomal lipid metabolism|Metabolism of lipids|Metabolism of steroids|Fatty acid metabolism|Peroxisomal protein import|Protein localization
Acox3	1213.58	1142.01	1285.14	1.12534	0.170361	0.304381	0.621629	Up	5.56891	4.32758	5.18995	3.82986	3.42398	4.58838	80911	acyl-Coenzyme A oxidase 3%2C pristanoyl	protein_coding	mmu00640,mmu00071,mmu00592,mmu01040,mmu00410,mmu04024,mmu04146,mmu03320,mmu04936	Propanoate metabolism|Fatty acid degradation|alpha-Linolenic acid metabolism|Biosynthesis of unsaturated fatty acids|beta-Alanine metabolism|cAMP signaling pathway|Peroxisome|PPAR signaling pathway|Alcoholic liver disease	GO:0003997,GO:0005504,GO:0005739,GO:0005777,GO:0005782,GO:0006629,GO:0006631,GO:0006635,GO:0016402,GO:0016491,GO:0016627,GO:0033540,GO:0050660,GO:0055088,GO:0071949	acyl-CoA oxidase activity|fatty acid binding|mitochondrion|peroxisome|peroxisomal matrix|lipid metabolic process|fatty acid metabolic process|fatty acid beta-oxidation|pristanoyl-CoA oxidase activity|oxidoreductase activity|oxidoreductase activity, acting on the CH-CH group of donors|fatty acid beta-oxidation using acyl-CoA oxidase|flavin adenine dinucleotide binding|lipid homeostasis|FAD binding	WP4350,WP4347,WP4348,WP2316	Omega-3 / omega-6 fatty acid synthesis|Eicosanoid metabolism via cyclooxygenases (COX)|Eicosanoid metabolism via lipoxygenases (LOX)|PPAR signaling pathway	R-MMU-1430728,R-MMU-389887,R-MMU-390918,R-MMU-556833,R-MMU-8978868,R-MMU-9033241,R-MMU-9609507	Metabolism|Beta-oxidation of pristanoyl-CoA|Peroxisomal lipid metabolism|Metabolism of lipids|Fatty acid metabolism|Peroxisomal protein import|Protein localization
Acp1	733.458	684.422	782.493	1.14344	0.193384	0.155792	0.443946	Up	7.35636	7.67603	7.06269	5.75162	5.49896	5.88273	11431	acid phosphatase 1%2C soluble	protein_coding	mmu00730,mmu00740,mmu04520,mmu05208	Thiamine metabolism|Riboflavin metabolism|Adherens junction|Chemical carcinogenesis - reactive oxygen species	GO:0003993,GO:0004721,GO:0004725,GO:0004726,GO:0005737,GO:0005829,GO:0006470,GO:0009898,GO:0016787,GO:0016791,GO:0017124,GO:0042383	acid phosphatase activity|phosphoprotein phosphatase activity|protein tyrosine phosphatase activity|non-membrane spanning protein tyrosine phosphatase activity|cytoplasm|cytosol|protein dephosphorylation|cytoplasmic side of plasma membrane|hydrolase activity|phosphatase activity|SH3 domain binding|sarcolemma
Acp2	1958.06	1866.9	2049.22	1.09772	0.134515	0.285358	0.60453	Up	14.3729	12.8286	12.2709	10.769	11.3171	9.77354	11432	acid phosphatase 2%2C lysosomal	protein_coding	mmu00740,mmu04142	Riboflavin metabolism|Lysosome	GO:0001501,GO:0001784,GO:0003993,GO:0004721,GO:0005764,GO:0007040,GO:0010033,GO:0016020,GO:0016311,GO:0016787,GO:0048102	skeletal system development|phosphotyrosine residue binding|acid phosphatase activity|phosphoprotein phosphatase activity|lysosome|lysosome organization|response to organic substance|membrane|dephosphorylation|hydrolase activity|autophagic cell death
Acp5	1181.44	1143.13	1219.76	1.06695	0.093492	0.649162	0.854895	Up	11.1129	13.6338	13.7489	8.0831	10.6472	13.3495	11433	acid phosphatase 5%2C tartrate resistant	protein_coding	mmu00740,mmu04142,mmu04380,mmu05323	Riboflavin metabolism|Lysosome|Osteoclast differentiation|Rheumatoid arthritis	GO:0003993,GO:0005615,GO:0005764,GO:0006809,GO:0007162,GO:0008198,GO:0008199,GO:0010934,GO:0010936,GO:0016311,GO:0016787,GO:0030335,GO:0032496,GO:0032611,GO:0032615,GO:0032640,GO:0032691,GO:0032695,GO:0032720,GO:0032929,GO:0034097,GO:0042554,GO:0045019,GO:0045453,GO:0046872,GO:0050728,GO:0050830,GO:0060349	acid phosphatase activity|extracellular space|lysosome|nitric oxide biosynthetic process|negative regulation of cell adhesion|ferrous iron binding|ferric iron binding|macrophage cytokine production|negative regulation of macrophage cytokine production|dephosphorylation|hydrolase activity|positive regulation of cell migration|response to lipopolysaccharide|interleukin-1 beta production|interleukin…	WP454	Osteoclast signaling	R-MMU-1430728,R-MMU-196843,R-MMU-196849,R-MMU-196854	Metabolism|Vitamin B2 (riboflavin) metabolism|Metabolism of water-soluble vitamins and cofactors|Metabolism of vitamins and cofactors
Acp6	547.833	563.78	531.887	0.943601	-0.0837509	0.550438	0.803184	Down	9.73459	9.24488	8.58954	8.50254	8.696	8.70208	66659	acid phosphatase 6%2C lysophosphatidic	protein_coding			GO:0002244,GO:0003993,GO:0005737,GO:0005739,GO:0006629,GO:0006644,GO:0016311,GO:0016787,GO:0052642,GO:2001311	hematopoietic progenitor cell differentiation|acid phosphatase activity|cytoplasm|mitochondrion|lipid metabolic process|phospholipid metabolic process|dephosphorylation|hydrolase activity|lysophosphatidic acid phosphatase activity|lysobisphosphatidic acid metabolic process			R-MMU-1430728,R-MMU-1483166,R-MMU-1483206,R-MMU-1483257,R-MMU-556833	Metabolism|Synthesis of PA|Glycerophospholipid biosynthesis|Phospholipid metabolism|Metabolism of lipids
Acp7	230.541	317.845	143.238	0.450812	-1.1494	1.53896e-07	8.3501e-06	Down	1.00525	0.677834	0.755817	1.70447	1.53894	1.53293	101744	acid phosphatase 7%2C tartrate resistant	protein_coding			GO:0003674,GO:0003993,GO:0005575,GO:0005576,GO:0008150,GO:0016787,GO:0046872	molecular_function|acid phosphatase activity|cellular_component|extracellular region|biological_process|hydrolase activity|metal ion binding
Acpp	639.588	1025.44	253.731	0.247501	-2.0145	1.09644e-21	6.84143e-19	Down	1.48334	1.26647	1.12946	4.94625	5.42776	3.51944	56318	acid phosphatase%2C prostate	protein_coding			GO:0003993,GO:0004725,GO:0005576,GO:0005615,GO:0005764,GO:0005771,GO:0005886,GO:0006144,GO:0006629,GO:0006772,GO:0007040,GO:0008253,GO:0009117,GO:0012506,GO:0016020,GO:0016311,GO:0016787,GO:0016791,GO:0030141,GO:0030175,GO:0031985,GO:0033265,GO:0042131,GO:0042802,GO:0042803,GO:0045177,GO:0046085,GO:0051930,GO:0052642,GO:0060090,GO:0060168,GO:0106411	acid phosphatase activity|protein tyrosine phosphatase activity|extracellular region|extracellular space|lysosome|multivesicular body|plasma membrane|purine nucleobase metabolic process|lipid metabolic process|thiamine metabolic process|lysosome organization|5'-nucleotidase activity|nucleotide metabolic process|vesicle membrane|membrane|dephosphorylation|hydrolase activity|phosphatase activity|se…			R-MMU-168249,R-MMU-168256,R-MMU-6798695	Innate Immune System|Immune System|Neutrophil degranulation
Acrbp	55.7645	48.9307	62.5983	1.27833	0.354259	0.443071	0.735399	Up	0.866845	0.589526	1.20334	0.594129	0.88974	0.354709	54137	proacrosin binding protein	protein_coding			GO:0001669,GO:0001675,GO:0005515,GO:0005576,GO:0007286,GO:0009566,GO:0016504	acrosomal vesicle|acrosome assembly|protein binding|extracellular region|spermatid development|fertilization|peptidase activator activity
Acsbg1	147.03	199.783	94.2766	0.471837	-1.08364	0.000601293	0.00882795	Down	1.02856	0.619703	0.906894	1.36326	1.25477	2.15517	94180	acyl-CoA synthetase bubblegum family member 1	protein_coding	mmu00061,mmu00071,mmu04920,mmu03320	Fatty acid biosynthesis|Fatty acid degradation|Adipocytokine signaling pathway|PPAR signaling pathway	GO:0000038,GO:0000166,GO:0001676,GO:0004467,GO:0005524,GO:0005737,GO:0005777,GO:0005783,GO:0005794,GO:0005886,GO:0006629,GO:0006631,GO:0016020,GO:0016874,GO:0031410,GO:0031957,GO:0042759,GO:0043231,GO:0051384	very long-chain fatty acid metabolic process|nucleotide binding|long-chain fatty acid metabolic process|long-chain fatty acid-CoA ligase activity|ATP binding|cytoplasm|peroxisome|endoplasmic reticulum|Golgi apparatus|plasma membrane|lipid metabolic process|fatty acid metabolic process|membrane|ligase activity|cytoplasmic vesicle|very long-chain fatty acid-CoA ligase activity|long-chain fatty acid…	WP2316	PPAR signaling pathway	R-MMU-1430728,R-MMU-556833,R-MMU-75105,R-MMU-75876,R-MMU-8978868	Metabolism|Metabolism of lipids|Fatty acyl-CoA biosynthesis|Synthesis of very long-chain fatty acyl-CoAs|Fatty acid metabolism
Acsf2	623.752	451.344	796.16	1.76359	0.818518	3.65176e-05	0.000908027	Up	6.5296	8.14545	8.91296	3.37566	4.78425	3.73432	264895	acyl-CoA synthetase family member 2	protein_coding			GO:0000166,GO:0005524,GO:0005739,GO:0006629,GO:0006631,GO:0016874,GO:0031956,GO:0047760	nucleotide binding|ATP binding|mitochondrion|lipid metabolic process|fatty acid metabolic process|ligase activity|medium-chain fatty acid-CoA ligase activity|butyrate-CoA ligase activity			R-MMU-1430728,R-MMU-556833,R-MMU-77289,R-MMU-8978868	Metabolism|Metabolism of lipids|Mitochondrial Fatty Acid Beta-Oxidation|Fatty acid metabolism
Acsf3	289.965	290.676	289.254	0.99494	-0.00731785	0.978059	0.993629	Down	2.7855	3.39353	4.0696	2.75277	2.35927	4.01063	257633	acyl-CoA synthetase family member 3	protein_coding	mmu00061,mmu00280	Fatty acid biosynthesis|Valine, leucine and isoleucine degradation	GO:0000166,GO:0005524,GO:0005654,GO:0005739,GO:0006629,GO:0006631,GO:0006633,GO:0016874,GO:0016878,GO:0031957,GO:0090409,GO:0090410	nucleotide binding|ATP binding|nucleoplasm|mitochondrion|lipid metabolic process|fatty acid metabolic process|fatty acid biosynthetic process|ligase activity|acid-thiol ligase activity|very long-chain fatty acid-CoA ligase activity|malonyl-CoA synthetase activity|malonate catabolic process			R-MMU-1430728,R-MMU-556833,R-MMU-75105,R-MMU-75876,R-MMU-8978868	Metabolism|Metabolism of lipids|Fatty acyl-CoA biosynthesis|Synthesis of very long-chain fatty acyl-CoAs|Fatty acid metabolism
Acsl1	1694.75	1941.09	1448.41	0.746159	-0.422444	0.178229	0.477358	Down	3.46159	7.2095	7.99993	7.06859	5.43968	9.71371	14081	acyl-CoA synthetase long-chain family member 1	protein_coding	mmu00061,mmu00071,mmu04146,mmu04216,mmu04920,mmu03320,mmu04714	Fatty acid biosynthesis|Fatty acid degradation|Peroxisome|Ferroptosis|Adipocytokine signaling pathway|PPAR signaling pathway|Thermogenesis	GO:0000038,GO:0000166,GO:0001676,GO:0004467,GO:0005524,GO:0005739,GO:0005741,GO:0005777,GO:0005778,GO:0005783,GO:0006629,GO:0006631,GO:0008610,GO:0010033,GO:0010747,GO:0015908,GO:0016020,GO:0016874,GO:0019432,GO:0033211,GO:0035338,GO:0042178,GO:0043231,GO:0043539,GO:0043758,GO:0044539,GO:0047676,GO:0050197,GO:0090434,GO:0120162	very long-chain fatty acid metabolic process|nucleotide binding|long-chain fatty acid metabolic process|long-chain fatty acid-CoA ligase activity|ATP binding|mitochondrion|mitochondrial outer membrane|peroxisome|peroxisomal membrane|endoplasmic reticulum|lipid metabolic process|fatty acid metabolic process|lipid biosynthetic process|response to organic substance|positive regulation of long-chain …	WP4350,WP4351,WP401,WP336,WP4346,WP1269,WP2316	Omega-3 / omega-6 fatty acid synthesis|Omega-9 fatty acid synthesis|Mitochondrial long chain fatty acid beta-oxidation|Fatty acid biosynthesis|Cholesterol metabolism with Bloch and Kandutsch-Russell pathways|Fatty acid beta-oxidation|PPAR signaling pathway	R-MMU-1430728,R-MMU-2046104,R-MMU-2046105,R-MMU-2046106,R-MMU-556833,R-MMU-75105,R-MMU-75876,R-MMU-8978868	Metabolism|alpha-linolenic (omega3) and linoleic (omega6) acid metabolism|Linoleic acid (LA) metabolism|alpha-linolenic acid (ALA) metabolism|Metabolism of lipids|Fatty acyl-CoA biosynthesis|Synthesis of very long-chain fatty acyl-CoAs|Fatty acid metabolism
Acsl3	2408.77	2481.25	2336.28	0.941606	-0.0868045	0.559442	0.809151	Down	19.2935	14.3082	15.5154	14.7577	14.4585	16.8934	74205	acyl-CoA synthetase long-chain family member 3	protein_coding	mmu00061,mmu00071,mmu04146,mmu04216,mmu04920,mmu03320,mmu04714	Fatty acid biosynthesis|Fatty acid degradation|Peroxisome|Ferroptosis|Adipocytokine signaling pathway|PPAR signaling pathway|Thermogenesis	GO:0000166,GO:0001676,GO:0004467,GO:0005524,GO:0005739,GO:0005741,GO:0005777,GO:0005783,GO:0005794,GO:0005811,GO:0005886,GO:0006629,GO:0006631,GO:0006633,GO:0016020,GO:0016874,GO:0019901,GO:0019904,GO:0030182,GO:0031956,GO:0034379,GO:0035336,GO:0042998,GO:0043231,GO:0044539,GO:0047676,GO:0047760,GO:0048471,GO:0051047,GO:2001247	nucleotide binding|long-chain fatty acid metabolic process|long-chain fatty acid-CoA ligase activity|ATP binding|mitochondrion|mitochondrial outer membrane|peroxisome|endoplasmic reticulum|Golgi apparatus|lipid droplet|plasma membrane|lipid metabolic process|fatty acid metabolic process|fatty acid biosynthetic process|membrane|ligase activity|protein kinase binding|protein domain specific binding…	WP4350,WP4351,WP401,WP336,WP4346,WP1269,WP2316	Omega-3 / omega-6 fatty acid synthesis|Omega-9 fatty acid synthesis|Mitochondrial long chain fatty acid beta-oxidation|Fatty acid biosynthesis|Cholesterol metabolism with Bloch and Kandutsch-Russell pathways|Fatty acid beta-oxidation|PPAR signaling pathway	R-MMU-1430728,R-MMU-163685,R-MMU-400451,R-MMU-422356,R-MMU-434313,R-MMU-556833,R-MMU-75105,R-MMU-75876,R-MMU-8978868	Metabolism|Integration of energy metabolism|Free fatty acids regulate insulin secretion|Regulation of insulin secretion|Intracellular metabolism of fatty acids regulates insulin secretion|Metabolism of lipids|Fatty acyl-CoA biosynthesis|Synthesis of very long-chain fatty acyl-CoAs|Fatty acid metabolism
Acsl4	3756.98	3652	3861.97	1.05752	0.0806848	0.542363	0.80016	Up	24.1309	18.3878	21.0302	18.7218	17.4263	16.9426	50790	acyl-CoA synthetase long-chain family member 4	protein_coding	mmu00061,mmu00071,mmu04146,mmu04216,mmu04920,mmu03320,mmu04714	Fatty acid biosynthesis|Fatty acid degradation|Peroxisome|Ferroptosis|Adipocytokine signaling pathway|PPAR signaling pathway|Thermogenesis	GO:0000166,GO:0001676,GO:0004467,GO:0005524,GO:0005737,GO:0005739,GO:0005741,GO:0005777,GO:0005783,GO:0005811,GO:0005886,GO:0006629,GO:0006631,GO:0008610,GO:0015908,GO:0016020,GO:0016874,GO:0019217,GO:0019432,GO:0030182,GO:0030307,GO:0031957,GO:0031966,GO:0032024,GO:0032307,GO:0035336,GO:0035338,GO:0043025,GO:0043231,GO:0044233,GO:0047676,GO:0060136,GO:0060996	nucleotide binding|long-chain fatty acid metabolic process|long-chain fatty acid-CoA ligase activity|ATP binding|cytoplasm|mitochondrion|mitochondrial outer membrane|peroxisome|endoplasmic reticulum|lipid droplet|plasma membrane|lipid metabolic process|fatty acid metabolic process|lipid biosynthetic process|fatty acid transport|membrane|ligase activity|regulation of fatty acid metabolic process|t…	WP4350,WP4351,WP401,WP336,WP4346,WP1269,WP2316	Omega-3 / omega-6 fatty acid synthesis|Omega-9 fatty acid synthesis|Mitochondrial long chain fatty acid beta-oxidation|Fatty acid biosynthesis|Cholesterol metabolism with Bloch and Kandutsch-Russell pathways|Fatty acid beta-oxidation|PPAR signaling pathway	R-MMU-1430728,R-MMU-163685,R-MMU-400451,R-MMU-422356,R-MMU-434313,R-MMU-556833,R-MMU-75105,R-MMU-75876,R-MMU-8978868	Metabolism|Integration of energy metabolism|Free fatty acids regulate insulin secretion|Regulation of insulin secretion|Intracellular metabolism of fatty acids regulates insulin secretion|Metabolism of lipids|Fatty acyl-CoA biosynthesis|Synthesis of very long-chain fatty acyl-CoAs|Fatty acid metabolism
Acsl5	1862.37	1788.75	1935.99	1.0823	0.114097	0.493325	0.769067	Up	14.1583	19.6332	18.4869	14.3288	14.5638	14.0264	433256	acyl-CoA synthetase long-chain family member 5	protein_coding	mmu00061,mmu00071,mmu04146,mmu04216,mmu04920,mmu03320,mmu04714	Fatty acid biosynthesis|Fatty acid degradation|Peroxisome|Ferroptosis|Adipocytokine signaling pathway|PPAR signaling pathway|Thermogenesis	GO:0000166,GO:0001676,GO:0004467,GO:0005524,GO:0005654,GO:0005730,GO:0005739,GO:0005741,GO:0005743,GO:0005783,GO:0005886,GO:0006629,GO:0006631,GO:0008654,GO:0010747,GO:0010867,GO:0015908,GO:0016020,GO:0016874,GO:0032000,GO:0035338,GO:0047676,GO:2001236	nucleotide binding|long-chain fatty acid metabolic process|long-chain fatty acid-CoA ligase activity|ATP binding|nucleoplasm|nucleolus|mitochondrion|mitochondrial outer membrane|mitochondrial inner membrane|endoplasmic reticulum|plasma membrane|lipid metabolic process|fatty acid metabolic process|phospholipid biosynthetic process|positive regulation of long-chain fatty acid import across plasma m…	WP336,WP1269,WP2316	Fatty acid biosynthesis|Fatty acid beta-oxidation|PPAR signaling pathway	R-MMU-1430728,R-MMU-556833,R-MMU-75105,R-MMU-75876,R-MMU-8978868	Metabolism|Metabolism of lipids|Fatty acyl-CoA biosynthesis|Synthesis of very long-chain fatty acyl-CoAs|Fatty acid metabolism
Acsl6	3.3704	1.89741	4.8434	2.55552	1.35362	0.362667	0.673615	Up	0.0260675	0.0282059	0.00780925	0.00862937	0.0131314	0	216739	acyl-CoA synthetase long-chain family member 6	protein_coding	mmu00061,mmu00071,mmu04146,mmu04216,mmu04920,mmu03320,mmu04714	Fatty acid biosynthesis|Fatty acid degradation|Peroxisome|Ferroptosis|Adipocytokine signaling pathway|PPAR signaling pathway|Thermogenesis	GO:0000038,GO:0000166,GO:0001676,GO:0004467,GO:0005515,GO:0005524,GO:0005739,GO:0005741,GO:0005777,GO:0005783,GO:0006629,GO:0006631,GO:0007405,GO:0008654,GO:0010747,GO:0010976,GO:0015908,GO:0016020,GO:0016874,GO:0019432,GO:0019899,GO:0035338,GO:0042803,GO:0043231,GO:0047676	very long-chain fatty acid metabolic process|nucleotide binding|long-chain fatty acid metabolic process|long-chain fatty acid-CoA ligase activity|protein binding|ATP binding|mitochondrion|mitochondrial outer membrane|peroxisome|endoplasmic reticulum|lipid metabolic process|fatty acid metabolic process|neuroblast proliferation|phospholipid biosynthetic process|positive regulation of long-chain fat…	WP336,WP1269,WP2316	Fatty acid biosynthesis|Fatty acid beta-oxidation|PPAR signaling pathway	R-MMU-1430728,R-MMU-556833,R-MMU-75105,R-MMU-75876,R-MMU-8978868	Metabolism|Metabolism of lipids|Fatty acyl-CoA biosynthesis|Synthesis of very long-chain fatty acyl-CoAs|Fatty acid metabolism
Acsm1	236.312	221.233	251.391	1.13625	0.184281	0.871314	0.955095	Up	0.212184	3.73423	6.8838	2.61753	1.98055	3.85829	117147	acyl-CoA synthetase medium-chain family member 1	protein_coding	mmu00650,mmu00785	Butanoate metabolism|Lipoic acid metabolism	GO:0000166,GO:0004321,GO:0004467,GO:0005524,GO:0005525,GO:0005739,GO:0005759,GO:0006629,GO:0006631,GO:0006633,GO:0006637,GO:0015645,GO:0016874,GO:0018858,GO:0031956,GO:0046872,GO:0047760,GO:0102391	nucleotide binding|fatty-acyl-CoA synthase activity|long-chain fatty acid-CoA ligase activity|ATP binding|GTP binding|mitochondrion|mitochondrial matrix|lipid metabolic process|fatty acid metabolic process|fatty acid biosynthetic process|acyl-CoA metabolic process|fatty acid ligase activity|ligase activity|benzoate-CoA ligase activity|medium-chain fatty acid-CoA ligase activity|metal ion binding|…			R-MMU-1430728,R-MMU-156580,R-MMU-156587,R-MMU-159424,R-MMU-177135,R-MMU-177162,R-MMU-211859	Metabolism|Phase II - Conjugation of compounds|Amino Acid conjugation|Conjugation of carboxylic acids|Conjugation of benzoate with glycine|Conjugation of phenylacetate with glutamine|Biological oxidations
Acsm3	27.2284	24.3337	30.1231	1.23945	0.309697	0.662845	0.863781	Up	0.51678	0.271821	0.0688072	0.209091	0.17355	0.228784	20216	acyl-CoA synthetase medium-chain family member 3	protein_coding	mmu00650	Butanoate metabolism	GO:0000166,GO:0004321,GO:0005524,GO:0005739,GO:0005759,GO:0006629,GO:0006631,GO:0006633,GO:0006637,GO:0015645,GO:0016874,GO:0018729,GO:0031956,GO:0046872,GO:0047760,GO:0050218	nucleotide binding|fatty-acyl-CoA synthase activity|ATP binding|mitochondrion|mitochondrial matrix|lipid metabolic process|fatty acid metabolic process|fatty acid biosynthetic process|acyl-CoA metabolic process|fatty acid ligase activity|ligase activity|propionate CoA-transferase activity|medium-chain fatty acid-CoA ligase activity|metal ion binding|butyrate-CoA ligase activity|propionate-CoA lig…
Acss1	1025.08	984.495	1065.67	1.08237	0.114198	0.722001	0.889724	Up	4.81858	9.29656	12.6844	6.72152	5.90334	9.33853	68738	acyl-CoA synthetase short-chain family member 1	protein_coding	mmu00010,mmu00620,mmu00630,mmu00640	Glycolysis / Gluconeogenesis|Pyruvate metabolism|Glyoxylate and dicarboxylate metabolism|Propanoate metabolism	GO:0000166,GO:0003987,GO:0005524,GO:0005739,GO:0005759,GO:0006085,GO:0006629,GO:0016208,GO:0016874,GO:0019413,GO:0019427,GO:0019542,GO:0050218	nucleotide binding|acetate-CoA ligase activity|ATP binding|mitochondrion|mitochondrial matrix|acetyl-CoA biosynthetic process|lipid metabolic process|AMP binding|ligase activity|acetate biosynthetic process|acetyl-CoA biosynthetic process from acetate|propionate biosynthetic process|propionate-CoA ligase activity	WP662	Amino acid metabolism	R-MMU-1430728,R-MMU-211859,R-MMU-211945,R-MMU-71384	Metabolism|Biological oxidations|Phase I - Functionalization of compounds|Ethanol oxidation
Acss2	441.719	389.435	494.004	1.2689	0.343574	0.106625	0.357993	Up	6.6651	4.92175	4.31186	3.97953	3.30608	3.7865	60525	acyl-CoA synthetase short-chain family member 2	protein_coding	mmu00010,mmu00620,mmu00630,mmu00640	Glycolysis / Gluconeogenesis|Pyruvate metabolism|Glyoxylate and dicarboxylate metabolism|Propanoate metabolism	GO:0000166,GO:0003987,GO:0005524,GO:0005737,GO:0005829,GO:0006085,GO:0006629,GO:0008610,GO:0016874,GO:0019413,GO:0019542,GO:0050218	nucleotide binding|acetate-CoA ligase activity|ATP binding|cytoplasm|cytosol|acetyl-CoA biosynthetic process|lipid metabolic process|lipid biosynthetic process|ligase activity|acetate biosynthetic process|propionate biosynthetic process|propionate-CoA ligase activity	WP336,WP1269,WP1252	Fatty acid biosynthesis|Fatty acid beta-oxidation|Amino acid conjugation of benzoic acid	R-MMU-1430728,R-MMU-1592230,R-MMU-1852241,R-MMU-211859,R-MMU-211945,R-MMU-2151201,R-MMU-71384	Metabolism|Mitochondrial biogenesis|Organelle biogenesis and maintenance|Biological oxidations|Phase I - Functionalization of compounds|Transcriptional activation of mitochondrial biogenesis|Ethanol oxidation
Acss3	31.2635	20.0865	42.4405	2.10989	1.07717	0.113002	0.370617	Up	0.150903	0.0952484	0.431525	0.0582809	0.085999	0.138168	380660	acyl-CoA synthetase short-chain family member 3	protein_coding	mmu00640	Propanoate metabolism	GO:0000166,GO:0003674,GO:0003987,GO:0005524,GO:0005739,GO:0005759,GO:0006629,GO:0008150,GO:0016874,GO:0043231,GO:0047760,GO:0050218	nucleotide binding|molecular_function|acetate-CoA ligase activity|ATP binding|mitochondrion|mitochondrial matrix|lipid metabolic process|biological_process|ligase activity|intracellular membrane-bounded organelle|butyrate-CoA ligase activity|propionate-CoA ligase activity			R-MMU-1430728,R-MMU-556833,R-MMU-74182,R-MMU-77111	Metabolism|Metabolism of lipids|Ketone body metabolism|Synthesis of Ketone Bodies
Acta1	181.67	209.253	154.087	0.736234	-0.441763	0.265889	0.583984	Down	2.84578	3.09056	2.98387	1.59043	3.56139	5.64156	11459	actin alpha 1%2C skeletal muscle	protein_coding	mmu04814	Motor proteins	GO:0000166,GO:0001725,GO:0005515,GO:0005524,GO:0005737,GO:0005856,GO:0005865,GO:0005884,GO:0015629,GO:0016787,GO:0030017,GO:0030240,GO:0032991,GO:0048741	nucleotide binding|stress fiber|protein binding|ATP binding|cytoplasm|cytoskeleton|striated muscle thin filament|actin filament|actin cytoskeleton|hydrolase activity|sarcomere|skeletal muscle thin filament assembly|protein-containing complex|skeletal muscle fiber development	WP385,WP5056,WP5242	Myometrial relaxation and contraction pathways|Burn wound healing|Comprehensive IL-17A signaling	R-MMU-390522,R-MMU-397014	Striated Muscle Contraction|Muscle contraction
Acta2	4447.47	4897.91	3997.04	0.816045	-0.293279	0.291242	0.611095	Down	24.0341	44.7897	59.3133	40.3511	48.2757	50.9649	11475	actin alpha 2%2C smooth muscle%2C aorta	protein_coding	mmu04371,mmu04814,mmu04926,mmu04270	Apelin signaling pathway|Motor proteins|Relaxin signaling pathway|Vascular smooth muscle contraction	GO:0000166,GO:0001725,GO:0005515,GO:0005524,GO:0005604,GO:0005737,GO:0005856,GO:0006936,GO:0008217,GO:0014829,GO:0015629,GO:0016787,GO:0019901,GO:0030485,GO:0031514,GO:0061870,GO:0061874,GO:0070374,GO:2000491	nucleotide binding|stress fiber|protein binding|ATP binding|basement membrane|cytoplasm|cytoskeleton|muscle contraction|regulation of blood pressure|vascular associated smooth muscle contraction|actin cytoskeleton|hydrolase activity|protein kinase binding|smooth muscle contractile fiber|motile cilium|positive regulation of hepatic stellate cell migration|positive regulation of hepatic stellate ce…	WP5242	Comprehensive IL-17A signaling	R-MMU-397014,R-MMU-445355	Muscle contraction|Smooth Muscle Contraction
[truncated: 19,041 more rows]
