# Supplementary material for: Pre-conditioning with PQQ during pregnancy alleviates LPS-induced placental damage and improves the fetal survival and growth in mice
Source: Front Endocrinol (Lausanne). 2025 Jul 10;16:1617026. doi: 10.3389/fendo.2025.1617026 (PMC12286791; doi:10.3389/fendo.2025.1617026)
Supplement: Supplementary file 3 [file Table2.xlsx]

## Sheet: Sheet1
gene_id	BaseMean_DESeq2	BaseMean_control_Rescue	BaseMean_case_Case	FoldChange	log2FoldChange	p-value	q-value	Regulation	FPKM_LP1	FPKM_LP2	FPKM_LP3	FPKM_P1	FPKM_P2	FPKM_P3	gene_Dbxref	description	coding_type	pathway	pathway_description	GO_ID	GO_term	wiki_ID	wiki_term	Reactome_ID	Reactome_term	TF_family
0610005C13Rik	117.697	64.5932	170.801	2.64435	1.40291	0.0598746	0.222345	Up	0.375021	5.28156	6.95506	0.903515	1.68929	1.71822	71661	RIKEN cDNA 0610005C13 gene	non_coding			GO:0003674,GO:0005575,GO:0008150	molecular_function|cellular_component|biological_process
0610009B22Rik	512.812	552.89	472.734	0.85497	-0.226054	0.171785	0.427497	Down	8.3493	9.99959	10.4085	8.98943	10.0226	11.1678	66050	RIKEN cDNA 0610009B22 gene	protein_coding			GO:0001222,GO:0005634,GO:0005640,GO:0005654,GO:0005737,GO:0005783,GO:0006888,GO:0030008,GO:0043231,GO:0044325,GO:0048471,GO:0140416	transcription corepressor binding|nucleus|nuclear outer membrane|nucleoplasm|cytoplasm|endoplasmic reticulum|endoplasmic reticulum to Golgi vesicle-mediated transport|TRAPP complex|intracellular membrane-bounded organelle|transmembrane transporter binding|perinuclear region of cytoplasm|transcription regulator inhibitor activity			R-MMU-199977,R-MMU-199991,R-MMU-204005,R-MMU-392499,R-MMU-446203,R-MMU-5653656,R-MMU-597592,R-MMU-8876198,R-MMU-9007101,R-MMU-948021	ER to Golgi Anterograde Transport|Membrane Trafficking|COPII-mediated vesicle transport|Metabolism of proteins|Asparagine N-linked glycosylation|Vesicle-mediated transport|Post-translational protein modification|RAB GEFs exchange GTP for GDP on RABs|Rab regulation of trafficking|Transport to the Golgi and subsequent modification
0610009E02Rik	21.2342	18.0825	24.3859	1.34213	0.424527	0.494597	0.744698	Up	0.38404	0.347793	0.560243	0.376769	0.120342	0.3639	100125929	RIKEN cDNA 0610009E02 gene	non_coding			GO:0003674,GO:0005575,GO:0008150	molecular_function|cellular_component|biological_process
0610009L18Rik	22.059	18.4489	25.6692	1.39016	0.475248	0.440724	0.7066	Up	0.89219	1.00561	1.55914	1.15838	0.524917	0.505045	66838	RIKEN cDNA 0610009L18 gene	non_coding			GO:0003674,GO:0005575,GO:0008150	molecular_function|cellular_component|biological_process
0610010K14Rik	784.989	821.251	748.727	0.911841	-0.133146	0.408857	0.680054	Down	18.2829	23.0206	22.1214	19.0041	21.4739	21.856	104457	RIKEN cDNA 0610010K14 gene	protein_coding	mmu03082	ATP-dependent chromatin remodeling	GO:0003674,GO:0003677,GO:0005634,GO:0005654,GO:0005829,GO:0006325,GO:0008150,GO:0016589,GO:0042802,GO:0071339	molecular_function|DNA binding|nucleus|nucleoplasm|cytosol|chromatin organization|biological_process|NURF complex|identical protein binding|MLL1 complex
0610025J13Rik	7.22971	10.7185	3.74089	0.349603	-1.51621	0.204133	0.471371	Down	0.121752	0.025616	0.0141844	0.267096	0.0557139	0.0804071	78687	RIKEN cDNA 0610025J13 gene	non_coding			GO:0003674,GO:0005575,GO:0008150	molecular_function|cellular_component|biological_process
0610030E20Rik	1761.06	1820.79	1701.34	0.93444	-0.097826	0.466999	0.725743	Down	10.2225	8.58699	9.57048	7.70567	9.33819	10.1632	68364	RIKEN cDNA 0610030E20 gene	protein_coding			GO:0003674,GO:0005575,GO:0008150	molecular_function|cellular_component|biological_process
0610038B21Rik	15.7149	16.194	15.2359	0.937421	-0.0932317	0.883772	0.952345	Down	0.224477	0.212531	0.398318	0.194817	0.231123	0.376324	70345	RIKEN cDNA 0610038B21 gene	non_coding			GO:0003674,GO:0005575,GO:0008150	molecular_function|cellular_component|biological_process
0610039K10Rik	2.30504	2.35753	2.25255	0.945267	-0.0812063	0.963189	0.986415	Down	0.0276534	0.0261817	0.144976	0.103998	0	0.0821826	68386	RIKEN cDNA 0610039K10 gene	non_coding			GO:0003674,GO:0005575,GO:0008150	molecular_function|cellular_component|biological_process
0610040B10Rik	31.9878	31.8124	32.1633	1.01211	0.0173654	0.966831	0.987432	Up	2.15168	1.81082	2.13075	1.85441	1.84616	1.65785	67672	RIKEN cDNA 0610040B10 gene	non_coding			GO:0003674,GO:0005575,GO:0008150	molecular_function|cellular_component|biological_process
0610040F04Rik	11.3037	12.0246	10.5828	0.879871	-0.184637	0.838134	0.931227	Down	0.0989073	0.0312145	0.241982	0.123989	0.158411	0.0870937	75394	RIKEN cDNA 0610040F04 gene	non_coding			GO:0003674,GO:0005575,GO:0008150	molecular_function|cellular_component|biological_process
0610040J01Rik	76.644	53.1171	100.171	1.88516	0.914685	0.126241	0.357888	Up	0.292204	1.60459	1.78928	0.48352	0.577642	0.706296	76261	RIKEN cDNA 0610040J01 gene	protein_coding			GO:0003674,GO:0008150	molecular_function|biological_process
0610043K17Rik	5.80014	9.73207	1.86822	0.192776	-2.375	0.0624508	0.229123	Down	0	0.201446	0.0446189	0.520115	0.306697	0.337241	68400	RIKEN cDNA 0610043K17 gene	non_coding			GO:0003674,GO:0005575,GO:0008150	molecular_function|cellular_component|biological_process
1110002E22Rik	37.3365	45.3302	29.3428	0.649666	-0.622229	0.290884	0.571534	Down	0.0908406	0.113832	0.0420214	0.0954554	0.173306	0.0688153	102634333	RIKEN cDNA 1110002E22 gene	protein_coding			GO:0003674,GO:0005575,GO:0008150	molecular_function|cellular_component|biological_process
1110002J07Rik	6.39607	5.13303	7.65912	1.48432	0.569801	0.617476	0.819569	Up	0.0102448	0.0872961	0.150387	0.0481602	0.0316443	0.0710414	68488	RIKEN cDNA 1110002J07 gene	non_coding			GO:0003674,GO:0005575,GO:0008150	molecular_function|cellular_component|biological_process
1110002L01Rik	745.936	950.092	541.78	0.570286	-0.810242	1.55281e-08	7.71844e-07	Down	4.73371	4.12716	4.82135	6.23381	7.49129	7.73662	100043040	RIKEN cDNA 1110002L01 gene	non_coding			GO:0003674,GO:0005575,GO:0008150	molecular_function|cellular_component|biological_process
1110004F10Rik	3208.44	3244.74	3172.15	0.977686	-0.032557	0.756118	0.890089	Down	49.6376	49.5366	46.3884	41.2955	43.804	48.3246	56372	RIKEN cDNA 1110004F10 gene	protein_coding			GO:0003674,GO:0005575,GO:0008150	molecular_function|cellular_component|biological_process
1110006O24Rik	16.642	14.708	18.576	1.26472	0.338823	0.617318	0.8195	Up	0.993037	0.421464	0.610372	0.676087	0.423077	0.305296	66123	RIKEN cDNA 1110006O24 gene	non_coding
1110017D15Rik	27.9286	38.2542	17.6029	0.459488	-1.1219	0.0694614	0.244895	Down	0.11229	0.308311	0.200156	0.263935	0.300598	0.678551	73721	RIKEN cDNA 1110017D15 gene	protein_coding			GO:0002177,GO:0005634,GO:0005654,GO:0005737,GO:0005739,GO:0005829,GO:0005856,GO:0007283,GO:0030154,GO:0043014,GO:0048471,GO:0065003,GO:0097225	manchette|nucleus|nucleoplasm|cytoplasm|mitochondrion|cytosol|cytoskeleton|spermatogenesis|cell differentiation|alpha-tubulin binding|perinuclear region of cytoplasm|protein-containing complex assembly|sperm midpiece
1110018N20Rik	12.4928	12.0446	12.9409	1.07875	0.109364	0.877576	0.948709	Up	0.0485737	0.0270521	0.0419429	0.0214911	0.0470699	0.028305	68941	RIKEN cDNA 1110018N20 gene	non_coding			GO:0003674,GO:0005575,GO:0008150	molecular_function|cellular_component|biological_process
1110019D14Rik	131.044	132.983	129.105	0.969618	-0.0445119	0.848965	0.9358	Down	2.24712	2.24388	2.6875	2.19525	1.89792	2.5391	76311	RIKEN cDNA 1110019D14 gene	non_coding			GO:0003674,GO:0005575,GO:0008150	molecular_function|cellular_component|biological_process
1110020A21Rik	12.6035	13.0399	12.1672	0.93734	-0.0933553	0.90126	0.960176	Down	0.280228	0.408177	0.135612	0.182401	0.355108	0.256248	68531	RIKEN cDNA 1110020A21 gene	non_coding			GO:0003674,GO:0005575,GO:0008150	molecular_function|cellular_component|biological_process
1110025M09Rik	26.3361	25.7989	26.8733	1.04145	0.0585912	0.900283	0.959733	Up	0.280391	0.309714	0.404246	0.241653	0.300721	0.312484	68635	RIKEN cDNA 1110025M09 gene	protein_coding			GO:0003674,GO:0005575,GO:0008150	molecular_function|cellular_component|biological_process
1110028F11Rik	4.93384	0.722745	9.14493	12.9823	3.69848	0.00981018	0.0624767	Up	0.077777	0.101252	0.101939	0.00914065	0.01001	0	68690	RIKEN cDNA 1110028F11 gene	non_coding			GO:0003674,GO:0005575,GO:0008150	molecular_function|cellular_component|biological_process
1110032F04Rik	9.81868	5.25735	14.38	2.73714	1.45267	0.173452	0.429701	Up	0.0373955	0.123919	0.264668	0.00878971	0.0673795	0.0648288	68725	RIKEN cDNA 1110032F04 gene	protein_coding			GO:0003674,GO:0005575,GO:0008150,GO:0016020	molecular_function|cellular_component|biological_process|membrane
1110038B12Rik	279.833	275.259	284.407	1.03379	0.0479395	0.807567	0.915782	Up	13.372	11.9008	14.9089	9.89018	12.9419	11.8779	68763	RIKEN cDNA 1110038B12 gene	non_coding			GO:0003674,GO:0005575,GO:0008150	molecular_function|cellular_component|biological_process
1110038F14Rik	547.557	552.182	542.933	0.983708	-0.023698	0.872681	0.946474	Down	9.54978	9.40996	8.89115	7.45422	8.89767	9.01055	117171	RIKEN cDNA 1110038F14 gene	protein_coding			GO:0003674,GO:0005575,GO:0008150	molecular_function|cellular_component|biological_process
1110046J04Rik	71.9724	64.4191	79.5257	1.23763	0.307583	0.372336	0.648119	Up	3.41845	2.65972	2.4487	2.10023	2.40452	1.60938	68808	RIKEN cDNA 1110046J04 gene	non_coding			GO:0003674,GO:0005575,GO:0008150	molecular_function|cellular_component|biological_process
1110058D11Rik	1.95434	3.28953	0.619152	0.188291	-2.40896	0.272021	0.553025	Down	0.0394278	0.0373295	0	0.0741393	0	0.312467	68771	RIKEN cDNA 1110058D11 gene	non_coding			GO:0003674,GO:0005575,GO:0008150	molecular_function|cellular_component|biological_process
1110059E24Rik	404.504	331.631	477.377	1.43892	0.524983	0.0288886	0.135246	Up	10.6262	10.1478	7.00948	5.9909	4.45594	6.93258	66206	RIKEN cDNA 1110059E24 gene	protein_coding			GO:0003674,GO:0005575,GO:0008150	molecular_function|cellular_component|biological_process
1110059G10Rik	591.757	625.049	558.465	0.893394	-0.162632	0.280842	0.561762	Down	4.5539	4.11893	5.17688	4.12704	4.68066	5.06156	66202	RIKEN cDNA 1110059G10 gene	protein_coding			GO:0003674,GO:0005575,GO:0008150	molecular_function|cellular_component|biological_process
1110065P20Rik	418.304	400.191	436.416	1.08994	0.124244	0.440428	0.706395	Up	12.5801	13.9808	14.7922	11.1236	10.1153	12.7886	68920	RIKEN cDNA 1110065P20 gene	protein_coding			GO:0003674,GO:0005575,GO:0008150	molecular_function|cellular_component|biological_process
1300002E11Rik	200.234	212.255	188.213	0.886704	-0.173475	0.407398	0.678834	Down	1.46766	1.35812	1.12805	1.26749	1.21026	1.52627	100043489	RIKEN cDNA 1300002E11 gene	non_coding			GO:0003674,GO:0005575,GO:0008150	molecular_function|cellular_component|biological_process
1500002C15Rik	4.80762	4.94374	4.67151	0.950978	-0.0725161	0.947675	0.979671	Down	0.52076	1.10935	0.273015	0.489613	0.804266	0.515879	102636313	RIKEN cDNA 1500002C15 gene	non_coding			GO:0003674,GO:0005575,GO:0008150	molecular_function|cellular_component|biological_process
1500002F19Rik	8.83466	8.88273	8.78658	0.985769	-0.0206792	0.979627	0.993218	Down	0.049165	0.0512033	0.0360855	0.0277347	0.0303724	0.0681859	76683	RIKEN cDNA 1500002F19 gene	non_coding			GO:0003674,GO:0005575,GO:0009617	molecular_function|cellular_component|response to bacterium
1500004A13Rik	10.7613	10.6014	10.9213	1.03426	0.0485959	0.956995	0.983732	Up	0.0292448	0.072682	0.0229979	0.0549913	0.0376382	0.0144853	319830	RIKEN cDNA 1500004A13 gene	non_coding			GO:0003674,GO:0005575,GO:0008150	molecular_function|cellular_component|biological_process
1500009L16Rik	691.016	661.162	720.871	1.09088	0.125489	0.583421	0.799607	Up	15.069	17.3725	11.4506	11.9364	13.5087	10.4361	69784	RIKEN cDNA 1500009L16 gene	protein_coding			GO:0003674,GO:0005575,GO:0008150	molecular_function|cellular_component|biological_process
1500011B03Rik	300.415	308.126	292.703	0.949878	-0.0741859	0.690019	0.85963	Down	4.55193	5.19739	4.23369	4.42186	3.93931	4.85383	66236	RIKEN cDNA 1500011B03 gene	non_coding			GO:0003674,GO:0005575,GO:0008150	molecular_function|cellular_component|biological_process
1500015A07Rik	93.7074	97.2911	90.1237	0.926726	-0.109785	0.69747	0.862773	Down	1.63572	1.06804	1.33067	1.28599	1.29214	1.2991	68982	RIKEN cDNA 1500015A07 gene	non_coding			GO:0003674,GO:0005575,GO:0008150	molecular_function|cellular_component|biological_process
1500015L24Rik	1.2557	0.324733	2.18667	5.84477	2.54715	0.274859	0.555931	Up	0.13521	0.0640072	0.0354428	0	0	0.0334857	68994	RIKEN cDNA 1500015L24 gene	non_coding			GO:0003674,GO:0005575,GO:0008150	molecular_function|cellular_component|biological_process
1500026H17Rik	14.1784	17.041	11.3158	0.664484	-0.589694	0.37791	0.652854	Down	0.112645	0.10665	0.0908549	0.073321	0.160588	0.188844	69002	RIKEN cDNA 1500026H17 gene	non_coding			GO:0003674,GO:0005575,GO:0008150	molecular_function|cellular_component|biological_process
1600002D24Rik	4.36216	6.55856	2.16577	0.331637	-1.59232	0.24108	0.516735	Down	0.0356186	0.0449639	0	0.12279	0.0366731	0.0588079	69776	RIKEN cDNA 1600002D24 gene	non_coding			GO:0003674,GO:0005575,GO:0008150	molecular_function|cellular_component|biological_process
1600010M07Rik	1.84569	2.74556	0.945831	0.343599	-1.5412	0.440352	0.706395	Down	0.0426921	0.0404201	0.0447637	0.280971	0	0.042292	69781	RIKEN cDNA 1600010M07 gene	non_coding			GO:0003674,GO:0005575,GO:0008150	molecular_function|cellular_component|biological_process
1600012H06Rik	2104.85	2074.91	2134.79	1.029	0.0412465	0.713935	0.870844	Up	22.9109	20.6888	20.901	16.992	19.1091	19.9927	67912	RIKEN cDNA 1600012H06 gene	protein_coding			GO:0003674,GO:0005576,GO:0006915,GO:0008150	molecular_function|extracellular region|apoptotic process|biological_process			R-MMU-168249,R-MMU-168256,R-MMU-6798695	Innate Immune System|Immune System|Neutrophil degranulation
1600012P17Rik	125750	165610	85889.6	0.518626	-0.947233	0.000629602	0.00722606	Down	1004.46	1115.15	762.712	2084.12	1749.02	1078.5	72025	RIKEN cDNA 1600012P17 gene	non_coding			GO:0003674,GO:0005575,GO:0008150	molecular_function|cellular_component|biological_process
1600014C10Rik	2044.25	1716.12	2372.38	1.38218	0.466941	0.000503564	0.00608113	Up	17.5322	20.1685	19.4211	11.7505	11.0331	14.3651	72244	RIKEN cDNA 1600014C10 gene	protein_coding			GO:0003674,GO:0005737,GO:0005739,GO:0005783,GO:0005829,GO:0006914,GO:0006915,GO:0006979,GO:0016020,GO:0031966,GO:0051560	molecular_function|cytoplasm|mitochondrion|endoplasmic reticulum|cytosol|autophagy|apoptotic process|response to oxidative stress|membrane|mitochondrial membrane|mitochondrial calcium ion homeostasis
1600014C23Rik	1.86487	3.72974	0	0.0465161	-4.42613	0.0565826	0.21419	Down	0	0	0	0.204343	0.0447553	0.215305	72240	RIKEN cDNA 1600014C23 gene	protein_coding			GO:0003674,GO:0005575,GO:0008150	molecular_function|cellular_component|biological_process
1600015H23Rik	22.974	22.6947	23.2532	1.02826	0.0402035	0.949472	0.980548	Up	1.18005	1.03745	0.883797	0.356617	1.43195	0.918496	105243551	RIKEN cDNA 1600015H23 gene	non_coding			GO:0003674,GO:0005575,GO:0008150	molecular_function|cellular_component|biological_process
1600019K03Rik	60.6446	110.888	10.4016	0.0938346	-3.41374	6.53512e-14	1.0278e-11	Down	0.551328	0.626385	0.635889	3.62847	7.03887	6.71779	69768	RIKEN cDNA 1600019K03 gene	non_coding			GO:0003674,GO:0005575,GO:0008150	molecular_function|cellular_component|biological_process
1600020E01Rik	155.21	147.68	162.739	1.10056	0.138236	0.688886	0.859218	Up	5.02025	4.89932	10.0418	5.2646	4.29414	6.69469	72012	RIKEN cDNA 1600020E01 gene	non_coding			GO:0003674,GO:0005575,GO:0008150	molecular_function|cellular_component|biological_process
1600023N17Rik	5.4432	5.23739	5.64901	1.08065	0.1119	0.911951	0.964905	Up	0.0782689	0.247012	0.136778	0.122646	0.13431	0.129226	69788	RIKEN cDNA 1600023N17 gene	non_coding			GO:0003674,GO:0005575,GO:0008150	molecular_function|cellular_component|biological_process
1600025M17Rik	1523.55	1796.53	1250.56	0.696197	-0.522432	0.0164797	0.0913419	Down	74.8566	69.1431	46.0247	66.7181	86.0819	92.4914	72030	RIKEN cDNA 1600025M17 gene	non_coding			GO:0003674,GO:0005575,GO:0008150	molecular_function|cellular_component|biological_process
1600029I14Rik	6.44213	3.43609	9.44817	2.73646	1.45231	0.135384	0.372213	Up	0.182628	0.403453	0.319149	0.11447	0.0626781	0.120611	69797	RIKEN cDNA 1600029I14 gene	non_coding			GO:0003674,GO:0005575,GO:0008150	molecular_function|cellular_component|biological_process
1700001C19Rik	24.7326	31.8211	17.6441	0.553328	-0.853793	0.15739	0.405892	Down	0.252358	0.238928	0.250677	0.187314	0.341881	0.697349	75462	RIKEN cDNA 1700001C19 gene	protein_coding			GO:0003674,GO:0005575,GO:0008150	molecular_function|cellular_component|biological_process
1700001G11Rik	8.81318	8.68459	8.94177	1.02646	0.0376775	0.965725	0.986919	Up	0.204657	0.193765	0.572233	0.384832	0.210716	0.236528	69303	RIKEN cDNA 1700001G11 gene	non_coding			GO:0003674,GO:0005575,GO:0008150	molecular_function|cellular_component|biological_process
1700001G17Rik	2.544	3.52048	1.56752	0.446437	-1.16347	0.513544	0.758524	Down	0.0887459	0.0280076	0.0310174	0.222501	0.0609155	0	67503	RIKEN cDNA 1700001G17 gene	non_coding			GO:0003674,GO:0005575,GO:0008150	molecular_function|cellular_component|biological_process
1700001J03Rik	7.20632	7.78421	6.62843	0.846588	-0.240268	0.807587	0.915782	Down	0.0997662	0.0377827	0.0732251	0.0937992	0.020544	0.108714	69282	RIKEN cDNA 1700001J03 gene	protein_coding			GO:0003674,GO:0005575,GO:0008150	molecular_function|cellular_component|biological_process
1700001L05Rik	318.46	402.982	233.939	0.580213	-0.785347	0.0109813	0.0678076	Down	0.692177	1.04937	1.50206	1.29332	1.58772	2.16123	69291	RIKEN cDNA 1700001L05 gene	non_coding			GO:0003674,GO:0005575,GO:0008150	molecular_function|cellular_component|biological_process
1700001O22Rik	53.029	24.4489	81.609	3.34278	1.74105	0.000382237	0.00482737	Up	1.3993	0.869738	0.492801	0.271157	0.241955	0.222214	73598	RIKEN cDNA 1700001O22 gene	protein_coding			GO:0003674,GO:0005575,GO:0008150	molecular_function|cellular_component|biological_process
1700001P01Rik	7.15161	7.45834	6.84488	0.915512	-0.127349	0.90044	0.959748	Down	0.421448	0.399019	0.0883797	0.198121	0.17357	0.542748	72215	RIKEN cDNA 1700001P01 gene	protein_coding			GO:0003674,GO:0005575,GO:0008150	molecular_function|cellular_component|biological_process
1700003E16Rik	2.05566	3.80302	0.308308	0.0889893	-3.49022	0.0836289	0.276897	Down	0	0.0121457	0	0.0723672	0.0264165	0.0381247	71837	RIKEN cDNA 1700003E16 gene	protein_coding			GO:0003674,GO:0005575,GO:0008150	molecular_function|cellular_component|biological_process
1700003F12Rik	2.02926	1.85348	2.20504	1.20725	0.27172	0.881656	0.951098	Up	0.135909	0.032169	0.0712518	0.031945	0.139933	0	75480	RIKEN cDNA 1700003F12 gene	protein_coding			GO:0003674,GO:0005575,GO:0008150	molecular_function|cellular_component|biological_process
1700003G18Rik	5.33851	7.5838	3.09323	0.409373	-1.28851	0.292879	0.573368	Down	0.169667	0.240956	0	0.239279	0.262035	0.420192	69350	RIKEN cDNA 1700003G18 gene	non_coding			GO:0003674,GO:0005575,GO:0008150	molecular_function|cellular_component|biological_process
1700003M07Rik	5.66814	3.82412	7.51216	1.96506	0.974572	0.449004	0.712004	Up	0.01136	0.182842	0.0714673	0.0747638	0.0233926	0.022507	72225	RIKEN cDNA 1700003M07 gene	non_coding			GO:0003674,GO:0005575,GO:0008150	molecular_function|cellular_component|biological_process
1700007L15Rik	23.7482	24.4812	23.0152	0.940883	-0.087912	0.875626	0.947948	Down	1.19698	0.533307	0.849013	1.02609	0.761199	0.627757	100502742	RIKEN cDNA 1700007L15 gene	non_coding
1700008J07Rik	56.2251	54.3422	58.1079	1.06919	0.0965218	0.792772	0.908637	Up	0.475793	0.726897	0.782335	0.467669	0.578948	0.621303	629159	RIKEN cDNA 1700008J07 gene	non_coding			GO:0003674,GO:0005575,GO:0008150	molecular_function|cellular_component|biological_process
1700008O03Rik	1.92754	1.66586	2.18921	1.30165	0.380341	0.835542	0.929863	Up	0.0501494	0.0094961	0.0105166	0.01886	0	0.0298077	69349	RIKEN cDNA 1700008O03 gene	protein_coding			GO:0003674,GO:0005575,GO:0008150	molecular_function|cellular_component|biological_process
1700009N14Rik	3.95077	6.62903	1.27251	0.192361	-2.37811	0.153119	0.399021	Down	0.0208057	0.0196984	0.0436305	0.0978064	0.278481	0	75471	RIKEN cDNA 1700009N14 gene	protein_coding	mmu03013,mmu03008,mmu03250,mmu05166	Nucleocytoplasmic transport|Ribosome biogenesis in eukaryotes|Viral life cycle - HIV-1|Human T-cell leukemia virus 1 infection	GO:0000054,GO:0003924,GO:0005634,GO:0005737,GO:0006606,GO:0019904	ribosomal subunit export from nucleus|GTPase activity|nucleus|cytoplasm|protein import into nucleus|protein domain specific binding
1700010G06Rik	1.75844	0.995298	2.52158	2.49855	1.32109	0.53763	0.771861	Up	0	0.0434231	0.0288536	0.00862416	0	0.0181736	115488511	RIKEN cDNA 1700010G06 gene	non_coding			GO:0003674,GO:0005575,GO:0008150	molecular_function|cellular_component|biological_process
1700010I14Rik	26.3685	18.3656	34.3715	1.86145	0.896427	0.246936	0.523656	Up	0.476115	0.503809	0.543267	0.250151	0.0288359	0.471653	66931	RIKEN cDNA 1700010I14 gene	protein_coding			GO:0003674,GO:0005575,GO:0008150	molecular_function|cellular_component|biological_process
1700012D01Rik	24.8608	25.6624	24.0592	0.940298	-0.0888095	0.884071	0.952345	Down	0.870306	0.788163	1.22994	1.03171	1.24671	0.412332	72243	RIKEN cDNA 1700012D01 gene	non_coding			GO:0003674,GO:0005575,GO:0008150	molecular_function|cellular_component|biological_process
1700013H16Rik	4.14443	8.28885	0	0.0209715	-5.57542	0.00936276	0.0603914	Down	0	0	0	0.38123	0.0198803	0.0382554	75514	RIKEN cDNA 1700013H16 gene	protein_coding			GO:0000785,GO:0000795,GO:0001741,GO:0005515,GO:0005634,GO:0005730,GO:0007286,GO:0051321	chromatin|synaptonemal complex|XY body|protein binding|nucleus|nucleolus|spermatid development|meiotic cell cycle
1700016A09Rik	2.05649	1.29893	2.81405	2.13298	1.09287	0.600063	0.809374	Up	0.031495	0.178913	0.0660466	0	0	0.1248	74227	RIKEN cDNA 1700016A09 gene	non_coding			GO:0003674,GO:0005575,GO:0008150	molecular_function|cellular_component|biological_process
1700016C15Rik	3.93497	5.29071	2.57922	0.485744	-1.04173	0.472358	0.729332	Down	0.0258842	0.0245067	0.162841	0.243361	0.106602	0.0256416	69428	RIKEN cDNA 1700016C15 gene	protein_coding			GO:0003674,GO:0005575,GO:0008150	molecular_function|cellular_component|biological_process
1700016G22Rik	4.63187	4.14771	5.11602	1.22981	0.298432	0.831793	0.928051	Up	0.310436	0	0.418499	0.0833911	0.182644	0.263594	71867	RIKEN cDNA 1700016G22 gene	non_coding			GO:0003674,GO:0005575,GO:0008150	molecular_function|cellular_component|biological_process
1700017B05Rik	1969.19	1671.79	2266.6	1.35603	0.43939	0.00424585	0.0330779	Up	11.5558	10.6029	8.67592	6.55437	6.88547	6.88895	74211	RIKEN cDNA 1700017B05 gene	protein_coding			GO:0003674,GO:0005829,GO:0008150	molecular_function|cytosol|biological_process
1700017M07Rik	10.9092	13.8775	7.94083	0.571024	-0.808377	0.340517	0.622273	Down	0.13944	0.21123	0.350895	0.1311	0.430704	0.552532	76398	RIKEN cDNA 1700017M07 gene	non_coding			GO:0003674,GO:0005575,GO:0008150	molecular_function|cellular_component|biological_process
1700018G05Rik	10.3974	11.7315	9.06322	0.772802	-0.371829	0.63015	0.827606	Down	0.790928	0.748836	0.345545	0.495749	0.67862	1.04469	69388	RIKEN cDNA 1700018G05 gene	non_coding			GO:0003674,GO:0005575,GO:0008150	molecular_function|cellular_component|biological_process
1700018L02Rik	4.27322	3.11135	5.43509	1.73826	0.79764	0.495461	0.745277	Up	0.0843572	0.0599008	0.221126	0.0793118	0.0434273	0.062675	67329	RIKEN cDNA 1700018L02 gene	non_coding			GO:0003674,GO:0005575,GO:0008150	molecular_function|cellular_component|biological_process
1700019D03Rik	374.947	409.104	340.79	0.832912	-0.263764	0.500623	0.749091	Down	0.928753	2.30823	3.3443	2.25195	2.44095	2.37276	67080	RIKEN cDNA 1700019D03 gene	protein_coding			GO:0003674,GO:0005886,GO:0008150,GO:0016020,GO:0034237	molecular_function|plasma membrane|biological_process|membrane|protein kinase A regulatory subunit binding
1700020G03Rik	5.84639	2.08497	9.60781	4.59814	2.20105	0.106001	0.321171	Up	0.103278	0.00888925	0.177201	0.0353095	0.00966689	0.00930093	105243207	RIKEN cDNA 1700020G03 gene	non_coding			GO:0003674,GO:0005575,GO:0008150	molecular_function|cellular_component|biological_process
1700020L13Rik	8.34902	9.7537	6.94434	0.708536	-0.497086	0.643218	0.835018	Down	0.288749	0.0420588	0.163025	0.229713	0.0457381	0.352053	108167416	RIKEN cDNA 1700020L13 gene	non_coding			GO:0003674,GO:0005575,GO:0008150	molecular_function|cellular_component|biological_process
1700020L24Rik	2.72891	3.28953	2.1683	0.656429	-0.607289	0.752263	0.888148	Down	0.0976727	0.069356	0	0.0459154	0	0.193515	66330	RIKEN cDNA 1700020L24 gene	protein_coding			GO:0003674,GO:0005575,GO:0008150	molecular_function|cellular_component|biological_process
1700022N22Rik	20.1382	28.9575	11.3189	0.389946	-1.35865	0.0909404	0.292074	Down	0.119849	0.291783	0.197473	0.547308	0.105769	0.7802	69431	RIKEN cDNA 1700022N22 gene	non_coding			GO:0003674,GO:0005575,GO:0008150	molecular_function|cellular_component|biological_process
1700023D09Rik	10.7263	9.43842	12.0141	1.27352	0.348821	0.634536	0.830225	Up	0.381136	0.561325	0.66605	0.477787	0.348817	0.293661	102640359	RIKEN cDNA 1700023D09 gene	non_coding			GO:0003674,GO:0005575,GO:0008150	molecular_function|cellular_component|biological_process
1700024G13Rik	5.26705	5.86575	4.66835	0.796794	-0.327721	0.775328	0.89999	Down	0.660763	0.250239	0.0692826	0.248497	0.340163	0.523656	67085	RIKEN cDNA 1700024G13 gene	protein_coding			GO:0003674,GO:0005575,GO:0008150	molecular_function|cellular_component|biological_process
1700024N05Rik	3.76658	6.29485	1.2383	0.198491	-2.33285	0.0917254	0.293146	Down	0.0533977	0.0505559	0	0.100408	0.192425	0.18514	75520	RIKEN cDNA 1700024N05 gene	non_coding			GO:0003674,GO:0005575,GO:0008150	molecular_function|cellular_component|biological_process
1700025G04Rik	7813.63	8951.73	6675.53	0.745768	-0.423201	0.00285278	0.0241199	Down	17.9219	17.0241	15.0253	20.2916	20.6476	18.79	69399	RIKEN cDNA 1700025G04 gene	protein_coding			GO:0003674,GO:0005575,GO:0008150	molecular_function|cellular_component|biological_process
1700028E10Rik	10.1806	11.4379	8.9234	0.777692	-0.36273	0.653959	0.841522	Down	0.0580538	0.0641249	0.152177	0.0636785	0.109583	0.143774	625175	RIKEN cDNA 1700028E10 gene	non_coding			GO:0003674,GO:0005575,GO:0008150	molecular_function|cellular_component|biological_process
1700028J19Rik	8.20113	7.51052	8.89174	1.17644	0.234424	0.785402	0.90464	Up	0.177093	0.14671	0.301741	0.104063	0.11396	0.26315	70004	RIKEN cDNA 1700028J19 gene	non_coding			GO:0003674,GO:0005575,GO:0005886,GO:0008150	molecular_function|cellular_component|plasma membrane|biological_process
1700028K03Rik	11.6785	14.2678	9.0892	0.637907	-0.648582	0.379556	0.654328	Down	0.12134	0.0612705	0.050891	0.136899	0.0916169	0.096162	76421	RIKEN cDNA 1700028K03 gene	protein_coding			GO:0005515,GO:0005694,GO:0007130,GO:0007131,GO:0051321	protein binding|chromosome|synaptonemal complex assembly|reciprocal meiotic recombination|meiotic cell cycle
1700029J07Rik	60.3655	64.4323	56.2986	0.871673	-0.198142	0.578797	0.797029	Down	0.575037	0.444621	0.693381	0.513612	0.473649	0.778519	69479	RIKEN cDNA 1700029J07 gene	protein_coding			GO:0003674,GO:0005737,GO:0005813,GO:0005856,GO:0005881,GO:0008150,GO:0097731	molecular_function|cytoplasm|centrosome|cytoskeleton|cytoplasmic microtubule|biological_process|9+0 non-motile cilium
1700030C10Rik	76.6992	78.4759	74.9225	0.953503	-0.0686912	0.906527	0.962159	Down	2.13189	0.735286	0.766401	1.10241	0.45468	1.90072	69513	RIKEN cDNA 1700030C10 gene	non_coding			GO:0003674,GO:0005575,GO:0008150	molecular_function|cellular_component|biological_process
1700030J22Rik	172.871	149.576	196.167	1.31298	0.392843	0.121103	0.348353	Up	1.71651	1.55067	1.16987	0.847269	1.11931	1.06276	69528	RIKEN cDNA 1700030J22 gene	protein_coding			GO:0003674,GO:0005654,GO:0005829,GO:0008150	molecular_function|nucleoplasm|cytosol|biological_process
1700030K09Rik	167.753	188.405	147.1	0.780686	-0.357185	0.0745375	0.256937	Down	1.49513	1.56555	1.54691	1.78738	1.63114	1.86365	72254	RIKEN cDNA 1700030K09 gene	protein_coding			GO:0003674,GO:0005575,GO:0008150	molecular_function|cellular_component|biological_process
1700031F05Rik	19.8541	25.6341	14.0741	0.548498	-0.866441	0.170877	0.426092	Down	0.405779	0.292712	0.162084	0.472345	0.278529	0.669961	73300	RIKEN cDNA 1700031F05 gene	protein_coding			GO:0003674,GO:0005575,GO:0008150	molecular_function|cellular_component|biological_process
1700034H15Rik	42.625	32.0244	53.2255	1.65864	0.729997	0.117181	0.341633	Up	0.482318	0.222616	0.316076	0.20973	0.124149	0.215009	98736	RIKEN cDNA 1700034H15 gene	non_coding			GO:0003674,GO:0005575,GO:0008150	molecular_function|cellular_component|biological_process
1700034P13Rik	18.2797	24.0104	12.549	0.521912	-0.938122	0.115606	0.338857	Down	0.228834	0.28332	0.184568	0.430296	0.253733	0.52313	73331	RIKEN cDNA 1700034P13 gene	non_coding			GO:0003674,GO:0005575,GO:0008150	molecular_function|cellular_component|biological_process
1700036A12Rik	3.18284	1.38333	4.98235	3.59685	1.84674	0.302831	0.582318	Up	0.0578495	0.0985874	0.0242626	0.0435116	0	0	100040447	RIKEN cDNA 1700036A12 gene	non_coding			GO:0003674,GO:0005575,GO:0008150	molecular_function|cellular_component|biological_process
1700037C18Rik	27.5603	21.8177	33.3028	1.53161	0.615046	0.222391	0.494013	Up	0.671244	1.08946	0.754087	0.405705	0.617068	0.451218	73261	RIKEN cDNA 1700037C18 gene	protein_coding			GO:0003674,GO:0005575,GO:0008150	molecular_function|cellular_component|biological_process
1700040K01Rik	46.83	37.9468	55.7133	1.47413	0.559862	0.311291	0.59118	Up	1.46235	1.81577	0.930041	0.81141	1.30818	0.403721	102631675	RIKEN cDNA 1700040K01 gene	non_coding			GO:0003674,GO:0005575,GO:0008150	molecular_function|cellular_component|biological_process
1700042O10Rik	1.82002	3.33173	0.308308	0.10128	-3.30358	0.183248	0.444375	Down	0	0.0231617	0	0.0920017	0	0.145406	73321	RIKEN cDNA 1700042O10 gene	non_coding			GO:0003674,GO:0005575,GO:0008150	molecular_function|cellular_component|biological_process
1700045H11Rik	3.79787	4.45248	3.14327	0.703697	-0.506974	0.669134	0.849327	Down	0.088696	0.209939	0.1395	0.250173	0.0913219	0.219662	73348	RIKEN cDNA 1700045H11 gene	non_coding			GO:0003674,GO:0005575,GO:0008150	molecular_function|cellular_component|biological_process
1700047M11Rik	2.49128	4.67172	0.310844	0.0722144	-3.79157	0.0693441	0.244692	Down	0.0383358	0	0	0.0360429	0.0789415	0.417742	67330	RIKEN cDNA 1700047M11 gene	non_coding			GO:0003674,GO:0005575,GO:0008150	molecular_function|cellular_component|biological_process
1700048M11Rik	1.67099	3.0153	0.326679	0.112821	-3.14789	0.325919	0.606832	Down	0	0	0.05709	0	0.44848	0	100503166	RIKEN cDNA 1700048M11 gene	non_coding			GO:0003674,GO:0005575,GO:0008150	molecular_function|cellular_component|biological_process
1700048O20Rik	11.0365	9.08147	12.9916	1.43062	0.516641	0.483001	0.736279	Up	0.113846	0.202101	0.268582	0.107037	0.131868	0.126876	69430	RIKEN cDNA 1700048O20 gene	non_coding			GO:0003674,GO:0005575,GO:0008150	molecular_function|cellular_component|biological_process
1700049E15Rik	1.20984	2.41969	0	0.0718302	-3.79926	0.139455	0.378148	Down	0	0	0	0.0536926	0.058799	0.0848596	100039727	RIKEN cDNA 1700049E15 gene	non_coding			GO:0003674,GO:0005575,GO:0008150	molecular_function|cellular_component|biological_process
1700052H01Rik	1.46602	2.93204	0	0.0595904	-4.06878	0.119744	0.346184	Down	0	0	0	0.0228516	0.150149	0.0240775	73462	RIKEN cDNA 1700052H01 gene	non_coding			GO:0003674,GO:0005575,GO:0008150	molecular_function|cellular_component|biological_process
1700052K11Rik	592.082	572.301	611.864	1.06964	0.0971236	0.561524	0.786861	Up	6.56914	6.93123	7.59611	5.86897	6.29253	5.40679	73431	RIKEN cDNA 1700052K11 gene	non_coding			GO:0003674,GO:0005575,GO:0008150	molecular_function|cellular_component|biological_process
1700054A03Rik	1.97806	1.06858	2.88753	2.71611	1.44154	0.435964	0.703111	Up	0.0337159	0.063843	0.212111	0.0633986	0.034714	0	78457	RIKEN cDNA 1700054A03 gene	non_coding			GO:0003674,GO:0005575,GO:0008150	molecular_function|cellular_component|biological_process
1700055D16Rik	6.79574	8.27546	5.31602	0.642491	-0.638252	0.633885	0.829943	Down	0.176341	0	0.0246531	0.0884236	0.0726248	0.116459	105242798	RIKEN cDNA 1700055D16 gene	non_coding			GO:0003674,GO:0005575,GO:0008150	molecular_function|cellular_component|biological_process
1700055D18Rik	14.7244	16.7896	12.6592	0.754135	-0.407106	0.530505	0.767764	Down	0.221711	0.177618	0.286116	0.160347	0.333633	0.321003	73405	RIKEN cDNA 1700055D18 gene	non_coding			GO:0003674,GO:0005575,GO:0008150	molecular_function|cellular_component|biological_process
1700055K11Rik	6.95895	4.96537	8.95254	1.78358	0.834775	0.494306	0.744681	Up	0.0347862	0.0878264	0.206687	0.0218038	0.0119387	0.137841	102640035	RIKEN cDNA 1700055K11 gene	non_coding			GO:0003674,GO:0005575,GO:0008150	molecular_function|cellular_component|biological_process
1700056E22Rik	12.5932	13.7515	11.4348	0.832092	-0.265184	0.774465	0.89964	Down	0.0543917	0.411976	0.513279	0.178985	0.504018	0.377173	73363	RIKEN cDNA 1700056E22 gene	protein_coding			GO:0003674,GO:0005575,GO:0008150	molecular_function|cellular_component|biological_process
1700060C16Rik	2.40074	1.02638	3.7751	3.65669	1.87054	0.289314	0.570384	Up	0.326181	0.0386028	0.128253	0	0.0419798	0.0807811	73425	RIKEN cDNA 1700060C16 gene	non_coding			GO:0003674,GO:0005575,GO:0008150	molecular_function|cellular_component|biological_process
1700063D05Rik	1.45669	2.29423	0.619152	0.269369	-1.89234	0.424703	0.692564	Down	0.0370922	0.0351182	0	0.0348737	0	0.220467	78500	RIKEN cDNA 1700063D05 gene	non_coding			GO:0003674,GO:0005575,GO:0008150	molecular_function|cellular_component|biological_process
1700063K16Rik	2.05986	3.79304	0.326679	0.0892001	-3.48681	0.103096	0.315992	Down	0	0	0.0212766	0.152626	0.0208927	0.0402035	76610	RIKEN cDNA 1700063K16 gene	non_coding
1700066M21Rik	236.309	223.166	249.452	1.11862	0.161715	0.399724	0.673264	Up	2.3239	1.84463	2.01824	1.60373	1.70792	1.62001	73467	RIKEN cDNA 1700066M21 gene	protein_coding			GO:0003674,GO:0005739,GO:0006119,GO:0070469	molecular_function|mitochondrion|oxidative phosphorylation|respirasome
1700067K01Rik	4.24568	3.04805	5.44332	1.77394	0.826957	0.593462	0.805575	Up	0	0.0656095	0.13321	0.0108588	0.023783	0.068648	73453	RIKEN cDNA 1700067K01 gene	protein_coding			GO:0001701,GO:0003674,GO:0005575	in utero embryonic development|molecular_function|cellular_component
1700082M22Rik	2.01774	1.8013	2.23418	1.24971	0.321595	0.841566	0.932854	Up	0.0070866	0.0134189	0.0297219	0.00666275	0.0218892	0.00702018	105243269	RIKEN cDNA 1700082M22 gene	non_coding			GO:0003674,GO:0005575,GO:0008150	molecular_function|cellular_component|biological_process
1700084E18Rik	3.60754	1.85348	5.36161	2.95355	1.56245	0.284636	0.565392	Up	0.241824	0.40067	0.380337	0.0568401	0.248983	0	67350	RIKEN cDNA 1700084E18 gene	non_coding			GO:0003674,GO:0005575,GO:0008150	molecular_function|cellular_component|biological_process
1700086L19Rik	197.315	191.517	203.113	1.06021	0.0843559	0.771453	0.898111	Up	6.96429	5.42727	3.76974	4.23122	3.72761	5.77824	74284	RIKEN cDNA 1700086L19 gene	non_coding			GO:0003674,GO:0005575,GO:0008150	molecular_function|cellular_component|biological_process
1700086O06Rik	43.4392	50.417	36.4613	0.721425	-0.471078	0.384827	0.659316	Down	0.490285	0.606029	0.471236	0.409744	0.364578	1.22772	73516	RIKEN cDNA 1700086O06 gene	non_coding			GO:0003674,GO:0005575,GO:0008150	molecular_function|cellular_component|biological_process
1700086P04Rik	33.4134	34.1633	32.6636	0.952662	-0.0699644	0.897293	0.958576	Down	0.114918	0.0884021	0.169446	0.145186	0.0554628	0.149417	67349	RIKEN cDNA 1700086P04 gene	non_coding			GO:0003674,GO:0005575,GO:0008150	molecular_function|cellular_component|biological_process
1700088E04Rik	194.554	201.913	187.196	0.927855	-0.108029	0.7224	0.87406	Down	4.00737	4.50549	2.86855	4.51036	3.53091	2.86285	27660	RIKEN cDNA 1700088E04 gene	protein_coding			GO:0003674,GO:0005575,GO:0008150	molecular_function|cellular_component|biological_process
1700095J03Rik	4.12357	4.16881	4.07833	0.979178	-0.030357	0.977901	0.992504	Down	0.0869367	0.0548734	0.0455776	0.0408685	0.0596737	0.0717683	74293	RIKEN cDNA 1700095J03 gene	non_coding			GO:0003674,GO:0005575,GO:0008150	molecular_function|cellular_component|biological_process
1700096K18Rik	61.0271	71.9656	50.0885	0.694757	-0.52542	0.20311	0.470086	Down	0.671525	1.18566	1.00859	1.10915	0.859586	1.77994	73571	RIKEN cDNA 1700096K18 gene	non_coding			GO:0003674,GO:0005575,GO:0008150	molecular_function|cellular_component|biological_process
1700101I11Rik	10.3059	11.5012	9.11073	0.793218	-0.33421	0.637543	0.831898	Down	0.226927	0.286467	0.211501	0.237061	0.285567	0.299734	100504641	RIKEN cDNA 1700101I11 gene	non_coding			GO:0003674,GO:0005575,GO:0008150	molecular_function|cellular_component|biological_process
1700102H20Rik	2.4321	1.72916	3.13504	1.81084	0.856658	0.663591	0.846587	Up	0.280267	0.0884504	0.0979555	0.219587	0	0	68230	RIKEN cDNA 1700102H20 gene	non_coding			GO:0003674,GO:0005575,GO:0008150	molecular_function|cellular_component|biological_process
1700102P08Rik	11.7413	10.7468	12.7359	1.18915	0.249935	0.77878	0.901842	Up	0.0952346	0.154571	0.299567	0.166286	0.196108	0.0404323	112418	RIKEN cDNA 1700102P08 gene	protein_coding			GO:0003674,GO:0005575,GO:0007283,GO:0030154	molecular_function|cellular_component|spermatogenesis|cell differentiation
1700105F02Rik	5.32102	9.05869	1.58335	0.175347	-2.51171	0.0439673	0.180745	Down	0.0158091	0.00748386	0.0165762	0.0371588	0.130217	0.0313218	102640957	RIKEN cDNA 1700105F02 gene	non_coding			GO:0003674,GO:0005575,GO:0008150	molecular_function|cellular_component|biological_process
1700105P06Rik	2.91744	2.07499	3.75988	1.81004	0.856022	0.650431	0.839539	Up	0.0940907	0.311792	0.147985	0.26539	0	0	654802	RIKEN cDNA 1700105P06 gene	non_coding			GO:0003674,GO:0005575,GO:0008150	molecular_function|cellular_component|biological_process
1700108F19Rik	7.27342	6.46304	8.0838	1.24788	0.319476	0.762689	0.893279	Up	0.151488	0.516334	0.0953035	0.113942	0.124779	0.330151	73272	RIKEN cDNA 1700108F19 gene	non_coding			GO:0003674,GO:0005575,GO:0008150	molecular_function|cellular_component|biological_process
1700109H08Rik	10.1304	8.93491	11.3259	1.26406	0.338065	0.661854	0.845707	Up	0.625276	0.313411	0.385657	0.207486	0.265089	0.473671	77036	RIKEN cDNA 1700109H08 gene	protein_coding			GO:0003674,GO:0005509,GO:0005575,GO:0008150	molecular_function|calcium ion binding|cellular_component|biological_process
1700110C19Rik	2.14023	2.40971	1.87076	0.776393	-0.365141	0.817056	0.92064	Down	0.0364243	0.137943	0.0381918	0.136983	0.0375027	0.0721659	76634	RIKEN cDNA 1700110C19 gene	non_coding			GO:0003674,GO:0005575,GO:0008150	molecular_function|cellular_component|biological_process
1700110I01Rik	4.7207	4.35643	5.08497	1.17648	0.234481	0.847704	0.935281	Up	0.0309029	0.0877748	0.12961	0.0290546	0.127271	0.0306133	73549	RIKEN cDNA 1700110I01 gene	non_coding			GO:0003674,GO:0005575,GO:0008150	molecular_function|cellular_component|biological_process
1700110K17Rik	2.97178	1.77022	4.17334	2.36309	1.24067	0.456731	0.718447	Up	0	0.140671	0.350523	0.0698459	0.0764886	0.0367965	73558	RIKEN cDNA 1700110K17 gene	non_coding			GO:0003674,GO:0005575,GO:0008150	molecular_function|cellular_component|biological_process
1700112D23Rik	1.77944	1.0164	2.54248	2.47212	1.30575	0.478995	0.733688	Up	0.0221181	0.0628228	0.0927652	0.0415903	0	0.0219108	73611	RIKEN cDNA 1700112D23 gene	non_coding			GO:0003674,GO:0005575,GO:0008150	molecular_function|cellular_component|biological_process
1700112J16Rik	17.7936	17.3347	18.2525	1.05252	0.0738505	0.901606	0.960241	Up	0.242917	0.179991	0.188259	0.099299	0.184863	0.24064	76628	RIKEN cDNA 1700112J16 gene	non_coding			GO:0003674,GO:0005575,GO:0008150	molecular_function|cellular_component|biological_process
1700113A16Rik	16.1261	14.9372	17.3149	1.15894	0.212811	0.706838	0.867069	Up	0.481557	0.506588	0.476873	0.352143	0.358088	0.424039	76642	RIKEN cDNA 1700113A16 gene	non_coding			GO:0003674,GO:0005575,GO:0008150	molecular_function|cellular_component|biological_process
1700122E12Rik	2.12556	1.06858	3.18254	3.00015	1.58503	0.356916	0.634949	Up	0.0421899	0.0266297	0.0737285	0.0264443	0.0144797	0	73619	RIKEN cDNA 1700122E12 gene	non_coding			GO:0003674,GO:0005575,GO:0008150	molecular_function|cellular_component|biological_process
1700122H20Rik	5.98717	10.391	1.58335	0.152546	-2.71269	0.0301216	0.139237	Down	0.124933	0.059142	0.130995	0.822224	0.836105	0.123762	73617	RIKEN cDNA 1700122H20 gene	non_coding			GO:0003674,GO:0005575,GO:0008150	molecular_function|cellular_component|biological_process
1700123M08Rik	12.4355	14.0774	10.7935	0.767193	-0.382339	0.608136	0.813818	Down	0.345382	0.116786	0.388008	0.278335	0.406408	0.293267	100503636	RIKEN cDNA 1700123M08 gene	non_coding			GO:0009611	response to wounding
1700123O12Rik	1.42315	0.324733	2.52158	6.73144	2.75091	0.300314	0.580249	Up	0	0.219179	0.14564	0	0	0.045866	73624	RIKEN cDNA 1700123O12 gene	non_coding			GO:0003674,GO:0005575,GO:0008150	molecular_function|cellular_component|biological_process
1700123O20Rik	1268.84	1270.18	1267.49	0.998006	-0.00287953	0.980101	0.993256	Down	18.2879	18.1046	19.4086	15.2066	17.0108	17.8272	58248	RIKEN cDNA 1700123O20 gene	protein_coding			GO:0003674,GO:0005739,GO:0005829,GO:0008150	molecular_function|mitochondrion|cytosol|biological_process
1810006J02Rik	2.85431	0.995298	4.71332	4.6279	2.21036	0.149903	0.394665	Up	0.093533	0.073796	0.0653811	0.0146565	0	0.0308855	69030	RIKEN cDNA 1810006J02 gene	non_coding			GO:0003674,GO:0005575,GO:0008150	molecular_function|cellular_component|biological_process
1810010H24Rik	218.018	198.752	237.283	1.19384	0.255606	0.785546	0.90473	Up	0.261675	1.8144	3.70403	1.62087	1.55314	1.11313	69066	RIKEN cDNA 1810010H24 gene	protein_coding			GO:0003674,GO:0005575,GO:0008150	molecular_function|cellular_component|biological_process
1810012K16Rik	4.52923	4.93262	4.12584	0.837521	-0.255803	0.829135	0.926832	Down	0.145563	0.183755	0.305252	0.0456189	0.349702	0.288397	69108	RIKEN cDNA 1810012K16 gene	non_coding			GO:0003674,GO:0005575,GO:0008150	molecular_function|cellular_component|biological_process
1810013A23Rik	1.42706	0.345832	2.50828	6.70091	2.74436	0.21284	0.482129	Up	0.126131	0.238837	0.132252	0.0592937	0	0	69050	RIKEN cDNA 1810013A23 gene	non_coding			GO:0003674,GO:0005575,GO:0008150	molecular_function|cellular_component|biological_process	WP723,WP509,WP431,WP4347,WP447,WP2316	Wnt signaling pathway and pluripotency|Nuclear Receptors|Nuclear receptors in lipid metabolism and toxicity|Eicosanoid metabolism via cyclooxygenases (COX)|Adipogenesis genes|PPAR signaling pathway
1810019D21Rik	106.112	81.3929	130.832	1.6034	0.681133	0.0236634	0.117799	Up	1.96399	2.29788	2.34391	1.11092	0.904209	1.70832	69771	RIKEN cDNA 1810019D21 gene	non_coding			GO:0003674,GO:0005575,GO:0008150	molecular_function|cellular_component|biological_process
1810019N24Rik	8.63965	9.73924	7.54005	0.779443	-0.359485	0.705405	0.866413	Down	0.207074	0.0980267	0.108561	0.0648962	0.302039	0.102567	69086	RIKEN cDNA 1810019N24 gene	non_coding			GO:0003674,GO:0005575,GO:0008150	molecular_function|cellular_component|biological_process
1810021B22Rik	8.32646	7.86633	8.78658	1.1134	0.154971	0.855926	0.93877	Up	0.402116	0.418787	0.29514	0.151226	0.248412	0.517851	69120	RIKEN cDNA 1810021B22 gene	non_coding			GO:0003674,GO:0005575,GO:0008150	molecular_function|cellular_component|biological_process
1810021M19Rik	4.8597	4.67118	5.04823	1.08855	0.122413	0.915176	0.966125	Up	0.00976183	0.0369692	0.0307065	0.0183559	0.0351779	0.00967034	105244357	RIKEN cDNA 1810021M19 gene	non_coding			GO:0003674,GO:0005575,GO:0008150	molecular_function|cellular_component|biological_process
1810024B03Rik	11.2446	10.1301	12.3591	1.21972	0.286549	0.70032	0.863691	Up	0.125629	0.171807	0.248814	0.183735	0.114976	0.0967958	329509	RIKEN cDNA 1810024B03 gene	protein_coding			GO:0004674,GO:0005634,GO:0005737,GO:0005829,GO:0006468,GO:0035556,GO:0045719	protein serine/threonine kinase activity|nucleus|cytoplasm|cytosol|protein phosphorylation|intracellular signal transduction|negative regulation of glycogen biosynthetic process
1810030O07Rik	1491.93	1424.08	1559.78	1.09531	0.131346	0.36277	0.64027	Up	14.2113	11.8687	10.862	9.83111	9.3722	10.9957	69155	RIKEN cDNA 1810030O07 gene	protein_coding			GO:0003674,GO:0005575,GO:0008150	molecular_function|cellular_component|biological_process
1810034E14Rik	78.0426	82.9839	73.1013	0.880026	-0.184382	0.584779	0.800715	Down	0.788075	1.13302	1.4537	1.15257	1.0368	1.24332	66503	RIKEN cDNA 1810034E14 gene	non_coding			GO:0003674,GO:0005575,GO:0008150	molecular_function|cellular_component|biological_process
1810037I17Rik	1841.86	2016.08	1667.65	0.827102	-0.273863	0.0565179	0.214176	Down	42.2229	50.4353	49.3854	45.8282	48.4944	60.1382	67704	RIKEN cDNA 1810037I17 gene	protein_coding	mmu04020	Calcium signaling pathway	GO:0005515,GO:0005789,GO:0016020,GO:1901877,GO:1901895	protein binding|endoplasmic reticulum membrane|membrane|negative regulation of calcium ion binding|negative regulation of ATPase-coupled calcium transmembrane transporter activity
1810041H14Rik	20.5329	13.4695	27.5963	2.04552	1.03247	0.193159	0.457417	Up	0.275376	1.23842	1.47978	0.194179	0.460733	0.681987	78312	RIKEN cDNA 1810041H14 gene	non_coding			GO:0003674,GO:0005575,GO:0008150	molecular_function|cellular_component|biological_process
1810044D09Rik	15.8901	15.9847	15.7955	0.987578	-0.0180335	0.980562	0.993266	Down	0.270559	1.2808	1.13475	0.763132	0.779994	0.91128	69798	RIKEN cDNA 1810044D09 gene	non_coding			GO:0003674,GO:0005575,GO:0008150	molecular_function|cellular_component|biological_process
1810053B23Rik	3.59061	4.32535	2.85586	0.664228	-0.59025	0.637331	0.831898	Down	0.030544	0.019279	0.0427015	0.0287171	0.0733793	0.0201718	69857	RIKEN cDNA 1810053B23 gene	non_coding			GO:0003674,GO:0005575,GO:0008150	molecular_function|cellular_component|biological_process
1810055G02Rik	1019.27	1090.93	947.625	0.868814	-0.202881	0.393543	0.66805	Down	9.42491	11.5841	13.2362	12.889	13.1386	8.8839	72056	RIKEN cDNA 1810055G02 gene	protein_coding			GO:0003674,GO:0005654,GO:0005794,GO:0005886,GO:0008150,GO:0016020,GO:0043231	molecular_function|nucleoplasm|Golgi apparatus|plasma membrane|biological_process|membrane|intracellular membrane-bounded organelle
1810062G17Rik	48.9001	34.0649	63.7353	1.86759	0.90118	0.0423138	0.176758	Up	2.82902	1.53055	1.48315	0.787089	0.743056	1.28687	72282	RIKEN cDNA 1810062G17 gene	protein_coding			GO:0003674,GO:0005575,GO:0008150	molecular_function|cellular_component|biological_process
1810062O18Rik	19.732	14.7596	24.7044	1.66616	0.736525	0.203277	0.470366	Up	0.94548	0.629929	1.17494	0.428004	0.360545	0.693792	75602	RIKEN cDNA 1810062O18 gene	non_coding			GO:0003674,GO:0005575,GO:0008150	molecular_function|cellular_component|biological_process
1810073O08Rik	2.88985	4.50466	1.27505	0.281539	-1.82859	0.224395	0.496625	Down	0.028293	0	0.0296659	0.0798025	0.043696	0.0560557	72285	RIKEN cDNA 1810073O08 gene	non_coding			GO:0003674,GO:0005575,GO:0008150	molecular_function|cellular_component|biological_process
2010001A14Rik	87.0207	111.139	62.9029	0.565322	-0.822856	0.013081	0.0773148	Down	1.58341	2.44425	2.81519	3.13923	3.29602	4.46701	76516	RIKEN cDNA 2010001A14 gene	non_coding			GO:0003674,GO:0005575,GO:0008150	molecular_function|cellular_component|biological_process
2010003K11Rik	522.738	770.491	274.986	0.356902	-1.4864	0.067343	0.240156	Down	1.37464	8.83299	9.286	15.4031	22.1581	10.9387	69861	RIKEN cDNA 2010003K11 gene	protein_coding			GO:0003674,GO:0005575,GO:0008150	molecular_function|cellular_component|biological_process
2010109A12Rik	4.32422	4.16995	4.4785	1.07135	0.0994298	0.946536	0.979274	Up	0.287938	0	0.402547	0.360956	0.098821	0.0950799	75610	RIKEN cDNA 2010109A12 gene	protein_coding			GO:0003674,GO:0005575,GO:0008150	molecular_function|cellular_component|biological_process
2010109P13Rik	3.41756	4.66174	2.17337	0.465232	-1.10398	0.508081	0.755404	Down	0.1389	0.0219179	0	0.0652961	0.0238353	0.22933	108169160	RIKEN cDNA 2010109P13 gene	non_coding			GO:0003674,GO:0005575,GO:0008150	molecular_function|cellular_component|biological_process
2010110K18Rik	2.09067	0.753825	3.42751	4.69617	2.23148	0.281789	0.562154	Up	0.203863	0.0827202	0.0305365	0	0.0599711	0	100503082	RIKEN cDNA 2010110K18 gene	non_coding			GO:0003674,GO:0005575,GO:0008150	molecular_function|cellular_component|biological_process
2010204K13Rik	1953.82	2287.53	1620.12	0.708127	-0.497919	0.000162072	0.0023995	Down	45.9526	45.639	51.0098	52.6135	56.3865	71.987	68355	RIKEN cDNA 2010204K13 gene	non_coding			GO:0003674,GO:0005575,GO:0008150	molecular_function|cellular_component|biological_process
2010315B03Rik	262.332	252.834	271.83	1.07446	0.103611	0.659054	0.844393	Up	2.18052	2.65432	3.28597	2.49385	1.89519	2.3658	630836	RIKEN cDNA 2010315B03 gene	protein_coding			GO:0000978,GO:0003700,GO:0006357	RNA polymerase II cis-regulatory region sequence-specific DNA binding|DNA-binding transcription factor activity|regulation of transcription by RNA polymerase II					zf-C2H2
2010320M18Rik	205.255	221.249	189.26	0.85487	-0.226224	0.277161	0.558512	Down	6.31867	7.11871	7.69864	6.3722	6.97822	8.88212	72093	RIKEN cDNA 2010320M18 gene	non_coding			GO:0003674,GO:0005575,GO:0008150	molecular_function|cellular_component|biological_process
2200002D01Rik	924.699	809.347	1040.05	1.2853	0.362106	0.0931433	0.296219	Up	44.6087	55.5434	70.595	36.186	44.9146	37.3051	72275	RIKEN cDNA 2200002D01 gene	protein_coding			GO:0003674,GO:0005634,GO:0005654,GO:0005730,GO:0005829,GO:0005886,GO:0008150	molecular_function|nucleus|nucleoplasm|nucleolus|cytosol|plasma membrane|biological_process
2210011K15Rik	10.711	15.3786	6.04348	0.392194	-1.35036	0.119594	0.346023	Down	0.0535336	0.0126711	0.0631476	0.138412	0.0826777	0.0662898	72365	RIKEN cDNA 2210011K15 gene	non_coding			GO:0003674,GO:0005575,GO:0008150	molecular_function|cellular_component|biological_process
2210016L21Rik	1087.67	1184.82	990.52	0.836115	-0.258226	0.269889	0.551028	Down	14.6839	20.8447	23.7999	17.4575	25.2432	20.7026	72357	RIKEN cDNA 2210016L21 gene	protein_coding			GO:0005575,GO:0005634,GO:0007275,GO:0016055,GO:0030178,GO:0060061	cellular_component|nucleus|multicellular organism development|Wnt signaling pathway|negative regulation of Wnt signaling pathway|Spemann organizer formation
2210039B01Rik	24.2228	26.3306	22.115	0.839204	-0.252907	0.690624	0.859853	Down	0.556847	0.527212	0.690025	0.214176	0.729696	0.977886	73644	RIKEN cDNA 2210039B01 gene	non_coding			GO:0003674,GO:0005575,GO:0008150	molecular_function|cellular_component|biological_process
2210404E10Rik	1.50319	0.753825	2.25255	3.05912	1.61311	0.484823	0.737493	Up	0.0449545	0.042562	0.235679	0	0.0925708	0	72305	RIKEN cDNA 2210404E10 gene	non_coding			GO:0003674,GO:0005575,GO:0008150	molecular_function|cellular_component|biological_process
2210406O10Rik	4.27065	5.027	3.51429	0.700632	-0.51327	0.716146	0.871576	Down	0.0771213	0	0.0970362	0.0435052	0.127047	0.0458391	76710	RIKEN cDNA 2210406O10 gene	non_coding			GO:0003674,GO:0005575,GO:0008150	molecular_function|cellular_component|biological_process
2210408F21Rik	13.9714	10.16	17.7829	1.75148	0.808573	0.272659	0.553538	Up	0.580482	0.191162	0.661575	0.189831	0.285841	0.250018	73652	RIKEN cDNA 2210408F21 gene	non_coding			GO:0003674,GO:0005575,GO:0008150	molecular_function|cellular_component|biological_process
2210408I21Rik	188.058	177.541	198.575	1.11901	0.162223	0.59138	0.803962	Up	0.377593	0.212075	0.217418	0.166072	0.235899	0.243452	72371	RIKEN cDNA 2210408I21 gene	protein_coding			GO:0003674,GO:0005575,GO:0008150	molecular_function|cellular_component|biological_process
2210418O10Rik	29.2741	36.5219	22.0263	0.601932	-0.732328	0.23684	0.511294	Down	0.106877	0.202378	0.154086	0.326575	0.0894083	0.277922	100504263	RIKEN cDNA 2210418O10 gene	protein_coding			GO:0003674,GO:0005575,GO:0008150	molecular_function|cellular_component|biological_process					zf-C2H2
2300009A05Rik	85.7089	82.3444	89.0735	1.07938	0.110205	0.719384	0.873386	Up	4.13386	3.53913	4.74945	2.93563	2.80731	4.61789	69478	RIKEN cDNA 2300009A05 gene	protein_coding			GO:0003674,GO:0005575,GO:0005576,GO:0008150	molecular_function|cellular_component|extracellular region|biological_process
2310001H17Rik	8.25898	7.93961	8.57835	1.07652	0.106376	0.900282	0.959733	Up	0.205189	0.259025	0.466148	0.160764	0.246474	0.372654	76432	RIKEN cDNA 2310001H17 gene	non_coding			GO:0003674,GO:0005575,GO:0008150	molecular_function|cellular_component|biological_process
2310008N11Rik	1.65071	2.68226	0.619152	0.2312	-2.11279	0.338955	0.620432	Down	0.0464635	0.0439908	0	0.174738	0	0.184112	72316	RIKEN cDNA 2310008N11 gene	non_coding			GO:0003674,GO:0005575,GO:0008150	molecular_function|cellular_component|biological_process
2310009B15Rik	105.888	87.202	124.575	1.42658	0.512562	0.0800064	0.268345	Up	5.94131	4.97104	7.29202	2.98784	3.55652	4.9275	69549	RIKEN cDNA 2310009B15 gene	protein_coding			GO:0003674,GO:0005575,GO:0008150	molecular_function|cellular_component|biological_process
2310010J17Rik	36.8508	35.0719	38.6297	1.09751	0.134228	0.804451	0.914702	Up	1.17316	2.12889	2.66519	1.37874	0.956249	2.61487	78329	RIKEN cDNA 2310010J17 gene	non_coding			GO:0003674,GO:0005575,GO:0008150	molecular_function|cellular_component|biological_process
2310011J03Rik	1178.97	1221.93	1136.01	0.929856	-0.104921	0.437951	0.704353	Down	17.9919	20.6965	18.2168	17.5567	18.2145	19.0482	66374	RIKEN cDNA 2310011J03 gene	protein_coding			GO:0003674,GO:0005575,GO:0008150	molecular_function|cellular_component|biological_process
2310015A10Rik	280.335	273.133	287.538	1.0514	0.0723107	0.741276	0.882682	Up	1.5741	1.53144	1.8383	1.34217	1.07861	1.81207	69548	RIKEN cDNA 2310015A10 gene	non_coding			GO:0003674,GO:0005575,GO:0008150	molecular_function|cellular_component|biological_process
2310016G11Rik	19.8775	19.0878	20.6672	1.08036	0.111514	0.910982	0.964803	Up	0.0250461	0.711394	0.892887	0.541605	0.206301	0.620283	69578	RIKEN cDNA 2310016G11 gene	non_coding			GO:0003674,GO:0005575,GO:0008150	molecular_function|cellular_component|biological_process
2310022A10Rik	575.281	588.937	561.625	0.953064	-0.0693554	0.669018	0.849327	Down	5.08117	5.34621	5.27213	4.76896	4.0943	5.95272	66367	RIKEN cDNA 2310022A10 gene	protein_coding			GO:0003674,GO:0005634,GO:0005654,GO:0008150	molecular_function|nucleus|nucleoplasm|biological_process
2310022B05Rik	3232.16	2927.83	3536.48	1.20793	0.272539	0.0221323	0.11254	Up	27.9206	29.8906	31.1682	22.5348	21.2636	21.9948	69551	RIKEN cDNA 2310022B05 gene	protein_coding			GO:0003674,GO:0005737,GO:0005829,GO:0008150	molecular_function|cytoplasm|cytosol|biological_process
2310030G06Rik	2402.05	2553.31	2250.78	0.881627	-0.18176	0.225612	0.498058	Down	52.4492	54.8053	42.6211	49.9264	50.5089	51.7072	66952	RIKEN cDNA 2310030G06 gene	protein_coding			GO:0003674,GO:0008150	molecular_function|biological_process
2310033P09Rik	357.129	317.108	397.15	1.2513	0.323428	0.181686	0.442142	Up	9.90156	7.69198	9.05099	5.03262	5.1627	9.05424	67862	RIKEN cDNA 2310033P09 gene	protein_coding			GO:0003674,GO:0005575,GO:0008150	molecular_function|cellular_component|biological_process			R-MMU-168249,R-MMU-168256,R-MMU-6798695	Innate Immune System|Immune System|Neutrophil degranulation
2310034C09Rik	1.29893	2.59786	0	0.06677	-3.90466	0.321953	0.603018	Down	0	0	0	0	0	0.221013	117172	RIKEN cDNA 2310034C09 gene	protein_coding			GO:0003674,GO:0005575,GO:0008150	molecular_function|cellular_component|biological_process			R-MMU-1266738,R-MMU-6805567	Developmental Biology|Keratinization
2310034G01Rik	1.75824	1.04748	2.469	2.36706	1.24309	0.537564	0.771857	Up	0.0333736	0.221182	0	0.0313775	0.0343616	0.0330608	75579	RIKEN cDNA 2310034G01 gene	non_coding			GO:0003674,GO:0005575,GO:0008150	molecular_function|cellular_component|biological_process
2310034O05Rik	45.0739	67.506	22.6418	0.335209	-1.57687	0.0056039	0.040963	Down	0.33259	0.404858	0.971458	1.45181	2.07908	0.941351	69571	RIKEN cDNA 2310034O05 gene	non_coding			GO:0003674,GO:0005575,GO:0008150	molecular_function|cellular_component|biological_process
2310039H08Rik	136.964	133.106	140.823	1.05733	0.0804195	0.78421	0.904591	Up	3.5382	5.08927	6.52798	4.2222	3.99324	4.61722	67101	RIKEN cDNA 2310039H08 gene	protein_coding			GO:0003674,GO:0005575,GO:0008150	molecular_function|cellular_component|biological_process
2310040G24Rik	10.734	8.1922	13.2758	1.61018	0.687222	0.354221	0.633145	Up	0.441134	0.417657	0.569279	0.287134	0.139752	0.369769	381792	RIKEN cDNA 2310040G24 gene	non_coding			GO:0009611	response to wounding
2310043M15Rik	2.43757	4.56682	0.308308	0.0742781	-3.75092	0.0466998	0.18791	Down	0	0.0157587	0	0.0625961	0.0856866	0.0659542	102633000	RIKEN cDNA 2310043M15 gene	non_coding			GO:0003674,GO:0005575,GO:0008150	molecular_function|cellular_component|biological_process
2310047D07Rik	15.1421	16.3106	13.9735	0.854811	-0.226323	0.735185	0.879809	Down	0.0772345	0.0365621	0.101228	0.090769	0.0596409	0.0717288	69657	RIKEN cDNA 2310047D07 gene	non_coding			GO:0003674,GO:0005575,GO:0008150	molecular_function|cellular_component|biological_process
2310057M21Rik	509.555	495.33	523.781	1.05801	0.0813575	0.588105	0.802055	Up	4.54691	4.2613	3.92195	3.31454	3.71675	3.73583	68277	RIKEN cDNA 2310057M21 gene	protein_coding			GO:0005737,GO:0005739,GO:0008150,GO:0016787,GO:0016887,GO:0042802	cytoplasm|mitochondrion|biological_process|hydrolase activity|ATP hydrolysis activity|identical protein binding
2310058N22Rik	203.585	170.842	236.328	1.38246	0.46724	0.210373	0.479237	Up	1.16051	0.518344	1.2249	0.804728	0.436661	0.618737	71921	RIKEN cDNA 2310058N22 gene	non_coding
2310061I04Rik	421.877	425.37	418.383	0.983417	-0.0241248	0.865012	0.9429	Down	5.38314	5.43565	5.52784	4.89866	4.62723	5.35715	69662	RIKEN cDNA 2310061I04 gene	protein_coding			GO:0003674,GO:0005739,GO:0008150	molecular_function|mitochondrion|biological_process
2310068J16Rik	7.76701	3.48827	12.0458	3.45358	1.78809	0.052772	0.203912	Up	0.164218	0.310957	0.418168	0.0882264	0.0724628	0.0697196	70281	RIKEN cDNA 2310068J16 gene	non_coding			GO:0003674,GO:0005575,GO:0008150	molecular_function|cellular_component|biological_process
2310069B03Rik	11.199	5.10195	17.2961	3.36179	1.74923	0.0601127	0.22309	Up	0.129266	0.149583	0.512033	0.0810228	0.0295761	0.0995976	69652	RIKEN cDNA 2310069B03 gene	non_coding			GO:0003674,GO:0005575,GO:0008150	molecular_function|cellular_component|biological_process
2400006E01Rik	9.13279	9.26192	9.00366	0.971943	-0.0410564	0.970931	0.989261	Down	0.0744293	0.540257	0.0780409	0.373215	0.0766329	0.196618	78648	RIKEN cDNA 2400006E01 gene	non_coding			GO:0003674,GO:0005575,GO:0008150	molecular_function|cellular_component|biological_process
2410002F23Rik	955.442	787.122	1123.76	1.42785	0.513843	0.000554254	0.00654027	Up	12.124	10.8945	14.2479	7.51402	7.92706	7.83422	668661	RIKEN cDNA 2410002F23 gene	protein_coding			GO:0003674,GO:0005575,GO:0008150	molecular_function|cellular_component|biological_process
2410003I16Rik	21.2393	35.1785	7.30015	0.206641	-2.2748	0.00115244	0.011879	Down	0.0714629	0.0202979	0.0749306	0.268755	0.125084	0.325649	102633190	RIKEN cDNA 2410003I16 gene	non_coding			GO:0003674,GO:0005575,GO:0008150	molecular_function|cellular_component|biological_process
2410003L11Rik	80.8631	73.364	88.3623	1.2071	0.271542	0.374303	0.649464	Up	4.68386	3.78364	3.55945	2.82808	3.40674	2.63924	69729	RIKEN cDNA 2410003L11 gene	non_coding			GO:0003674,GO:0005575,GO:0008150	molecular_function|cellular_component|biological_process
2410004B18Rik	1076.9	1152.98	1000.82	0.868197	-0.203905	0.119657	0.346095	Down	18.2193	17.7062	16.7155	15.8481	18.6047	19.9094	66421	RIKEN cDNA 2410004B18 gene	protein_coding			GO:0003674,GO:0005654,GO:0008150	molecular_function|nucleoplasm|biological_process
2410004P03Rik	3.31367	5.99235	0.634987	0.105673	-3.24232	0.0519314	0.202045	Down	0	0.0132511	0.0146751	0.131588	0.0720515	0.0277295	73667	RIKEN cDNA 2410004P03 gene	protein_coding			GO:0003674,GO:0005575,GO:0008150	molecular_function|cellular_component|biological_process
2410006H16Rik	821.388	1005.26	637.516	0.634146	-0.657113	0.000154232	0.002305	Down	39.4761	40.2917	35.2307	44.0875	51.6283	67.8141	69221	RIKEN cDNA 2410006H16 gene	non_coding			GO:0003674,GO:0005575,GO:0008150	molecular_function|cellular_component|biological_process
2410018L13Rik	5.80995	5.61316	6.00674	1.07133	0.0993971	0.937433	0.974564	Up	0.149529	0.0707855	0.137186	0	0.153956	0.148127	69732	RIKEN cDNA 2410018L13 gene	non_coding			GO:0003674,GO:0005575,GO:0008150	molecular_function|cellular_component|biological_process
2410022M11Rik	75.5048	68.8282	82.1815	1.19402	0.255829	0.44758	0.710949	Up	0.922025	1.43321	1.21206	0.698679	0.920985	1.07698	100503842	RIKEN cDNA 2410022M11 gene	non_coding			GO:0003674,GO:0005575,GO:0008150	molecular_function|cellular_component|biological_process
2410124H12Rik	3.97112	0.701645	7.24059	10.3722	3.37465	0.0474895	0.189949	Up	0.0370399	0.490962	0.310698	0	0.0381365	0.0366928	76785	RIKEN cDNA 2410124H12 gene	non_coding			GO:0003674,GO:0005575,GO:0008150	molecular_function|cellular_component|biological_process
2500002B13Rik	58.414	81.1942	35.6339	0.437971	-1.19109	0.00264785	0.0227115	Down	0.903824	1.18697	1.19224	1.97365	1.56098	3.26371	78353	RIKEN cDNA 2500002B13 gene	non_coding			GO:0003674,GO:0005575,GO:0008150	molecular_function|cellular_component|biological_process
2500004C02Rik	100.675	82.4593	118.891	1.43998	0.526053	0.151376	0.396325	Up	1.41329	1.19378	2.6296	1.00309	0.970091	1.27652	72326	RIKEN cDNA 2500004C02 gene	non_coding			GO:0003674,GO:0005575,GO:0008150	molecular_function|cellular_component|biological_process
2510002D24Rik	422.992	381.151	464.833	1.21905	0.285752	0.0794742	0.267317	Up	4.28724	3.98132	3.81496	2.63316	2.71446	3.56363	72307	RIKEN cDNA 2510002D24 gene	protein_coding			GO:0003674,GO:0005575,GO:0008150	molecular_function|cellular_component|biological_process
2510003B16Rik	3.27247	2.45077	4.09417	1.67491	0.744084	0.551621	0.780591	Up	0.239949	0.181743	0.201273	0.0451195	0.148231	0.14262	76786	RIKEN cDNA 2510003B16 gene	non_coding			GO:0003674,GO:0005575,GO:0008150	molecular_function|cellular_component|biological_process
2510009E07Rik	720.05	747.669	692.431	0.926106	-0.11075	0.449796	0.712643	Down	3.36114	3.63549	4.165	3.53358	3.5393	3.69792	72190	RIKEN cDNA 2510009E07 gene	protein_coding			GO:0003674,GO:0005575,GO:0007399	molecular_function|cellular_component|nervous system development
2510022D24Rik	109.149	68.8835	149.415	2.16449	1.11403	0.0837759	0.277247	Up	3.20668	1.49257	3.83187	0.421074	0.516454	2.71522	66567	RIKEN cDNA 2510022D24 gene	protein_coding			GO:0003674,GO:0005575,GO:0008150	molecular_function|cellular_component|biological_process
2510039O18Rik	2738.68	2832.66	2644.69	0.933783	-0.0988413	0.516095	0.759461	Down	17.9747	16.5709	15.5052	16.7254	16.5429	14.4298	77034	RIKEN cDNA 2510039O18 gene	protein_coding			GO:0003674,GO:0008150,GO:0016020	molecular_function|biological_process|membrane
2600006K01Rik	9.44808	5.73862	13.1575	2.30107	1.20231	0.340469	0.62224	Up	0.015272	0.173511	0.448365	0.0143586	0.157241	0.0756443	70319	RIKEN cDNA 2600006K01 gene	non_coding			GO:0003674,GO:0005575,GO:0008150	molecular_function|cellular_component|biological_process
2600014E21Rik	4.01094	4.90267	3.11921	0.638626	-0.646956	0.608627	0.81405	Down	0.0120351	0.00325559	0.00180272	0.0113153	0.00708079	0.00510955	102635707	RIKEN cDNA 2600014E21 gene	non_coding
2610008E11Rik	659.028	579.86	738.197	1.27258	0.347755	0.0931953	0.296291	Up	3.97989	4.32152	6.24647	3.34428	3.04768	3.84403	72128	RIKEN cDNA 2610008E11 gene	protein_coding	mmu05168	Herpes simplex virus 1 infection	GO:0000122,GO:0000977,GO:0001227	negative regulation of transcription by RNA polymerase II|RNA polymerase II transcription regulatory region sequence-specific DNA binding|DNA-binding transcription repressor activity, RNA polymerase II-specific			R-MMU-212436,R-MMU-73857,R-MMU-74160	Generic Transcription Pathway|RNA Polymerase II Transcription|Gene expression (Transcription)	zf-C2H2
2610020C07Rik	25.1216	29.2084	21.0349	0.718224	-0.477495	0.439033	0.70523	Down	0.317142	0.277166	0.217424	0.412856	0.125589	0.483338	69918	RIKEN cDNA 2610020C07 gene	non_coding			GO:0003674,GO:0005575,GO:0008150	molecular_function|cellular_component|biological_process
2610027K06Rik	17.0464	18.7285	15.3644	0.818749	-0.288506	0.711647	0.86994	Down	0.327882	0.107046	0.118549	0.0956703	0.151333	0.36961	69909	RIKEN cDNA 2610027K06 gene	non_coding			GO:0003674,GO:0005575,GO:0008150	molecular_function|cellular_component|biological_process
2610035D17Rik	16.231	20.5271	11.9349	0.584587	-0.77451	0.290133	0.571104	Down	0.19923	0.188627	0.149212	0.187314	0.483517	0.140973	72386	RIKEN cDNA 2610035D17 gene	non_coding			GO:0003674,GO:0005575,GO:0008150	molecular_function|cellular_component|biological_process
2610037D02Rik	2.40442	1.88456	2.92427	1.56306	0.644376	0.797666	0.911802	Up	0.00724273	0	0.0607534	0	0.0372858	0	70040	RIKEN cDNA 2610037D02 gene	non_coding			GO:0003674,GO:0005575,GO:0008150	molecular_function|cellular_component|biological_process
2610042L04Rik	14.859	14.5187	15.1992	1.04942	0.0695982	0.922747	0.968955	Up	0.0623752	0.0681412	0.100618	0.0902224	0.0741022	0.0285188	554327	RIKEN cDNA 2610042L04 gene	protein_coding			GO:0001933,GO:0005515,GO:0005575,GO:0007416,GO:0010821,GO:0060025	negative regulation of protein phosphorylation|protein binding|cellular_component|synapse assembly|regulation of mitochondrion organization|regulation of synaptic activity
2610044O15Rik8	251.95	256.688	247.213	0.962708	-0.0548293	0.816912	0.920529	Down	4.88652	3.05627	3.6797	3.81463	3.00347	3.96059	72139	RIKEN cDNA 2610044O15 gene	protein_coding			GO:0000122,GO:0000978,GO:0001227,GO:0001817,GO:0002682,GO:0005654	negative regulation of transcription by RNA polymerase II|RNA polymerase II cis-regulatory region sequence-specific DNA binding|DNA-binding transcription repressor activity, RNA polymerase II-specific|regulation of cytokine production|regulation of immune system process|nucleoplasm					zf-C2H2
2610203C22Rik	33.3963	41.5849	25.2076	0.605732	-0.723248	0.0947322	0.299381	Down	0.696506	0.439625	0.55326	0.694535	0.78232	1.02451	72481	RIKEN cDNA 2610203C22 gene	non_coding			GO:0003674,GO:0005575,GO:0008150	molecular_function|cellular_component|biological_process
2610206C17Rik	13.0971	11.1553	15.0389	1.35061	0.43361	0.51498	0.759269	Up	0.229747	0.319029	0.176656	0.129603	0.173469	0.182075	72495	RIKEN cDNA 2610206C17 gene	non_coding			GO:0003674,GO:0005575,GO:0008150	molecular_function|cellular_component|biological_process
2610306M01Rik	97.0556	88.128	105.983	1.19991	0.262927	0.35682	0.634849	Up	2.7977	2.67289	3.06679	1.93691	1.64976	2.82187	67170	RIKEN cDNA 2610306M01 gene	non_coding			GO:0003674,GO:0005575,GO:0008150	molecular_function|cellular_component|biological_process
2610307P16Rik	20.9637	21.2427	20.6848	0.977959	-0.0321541	0.956815	0.983702	Down	0.232386	0.247521	0.152289	0.218487	0.239266	0.115104	72518	RIKEN cDNA 2610307P16 gene	non_coding			GO:0003674,GO:0005575,GO:0008150	molecular_function|cellular_component|biological_process
2610318N02Rik	10.6123	3.85406	17.3706	4.52018	2.17638	0.0147758	0.0841211	Up	0.17343	0.343329	0.347161	0.0148234	0.0811659	0.0780932	70458	RIKEN cDNA 2610318N02 gene	protein_coding			GO:0003674,GO:0005575,GO:0008150	molecular_function|cellular_component|biological_process
2610507I01Rik	9.97622	8.95828	10.9942	1.22513	0.29294	0.741022	0.882572	Up	0.135792	0.0942811	0.0854286	0.144693	0.0279624	0.0538077	72203	RIKEN cDNA 2610507I01 gene	non_coding			GO:0003674,GO:0005575,GO:0008150	molecular_function|cellular_component|biological_process
2610524H06Rik	263.718	253.393	274.042	1.08064	0.111888	0.657899	0.843641	Up	6.345	9.40621	8.31611	6.01784	5.41539	8.71153	330173	RIKEN cDNA 2610524H06 gene	protein_coding			GO:0003674,GO:0005575,GO:0008150	molecular_function|cellular_component|biological_process
2610528J11Rik	1176.89	1168.44	1185.34	1.01458	0.0208763	0.904772	0.961362	Up	23.1562	31.1504	30.9646	23.9334	26.0454	25.2173	66451	RIKEN cDNA 2610528J11 gene	protein_coding			GO:0003674,GO:0005768,GO:0005886,GO:0016020	molecular_function|endosome|plasma membrane|membrane
2700003A03Rik	9.05749	7.37341	10.7416	1.4601	0.546071	0.500634	0.749091	Up	0.0421702	0.0648796	0.0718517	0.019824	0.048846	0.0417749	102638195	RIKEN cDNA 2700003A03 gene	non_coding			GO:0003674,GO:0005575,GO:0008150	molecular_function|cellular_component|biological_process
2700012I20Rik	7.57604	5.75141	9.40066	1.62323	0.698871	0.447147	0.71074	Up	0.322899	0.475557	0.263331	0.202391	0.0738798	0.319873	72588	RIKEN cDNA 2700012I20 gene	non_coding			GO:0003674,GO:0005575,GO:0008150	molecular_function|cellular_component|biological_process
2700038G22Rik	49.6582	59.5214	39.7951	0.66791	-0.582274	0.2303	0.503471	Down	1.22854	0.672449	0.523311	0.97458	0.711511	1.59734	67194	RIKEN cDNA 2700038G22 gene	non_coding			GO:0003674,GO:0005575,GO:0008150	molecular_function|cellular_component|biological_process
2700046A07Rik	11.6284	14.1201	9.13671	0.645676	-0.631118	0.365019	0.64218	Down	0.147951	0.093385	0.116348	0.127511	0.139637	0.232061	78449	RIKEN cDNA 2700046A07 gene	non_coding			GO:0003674,GO:0005575,GO:0008150	molecular_function|cellular_component|biological_process
2700049A03Rik	357.849	382.115	333.584	0.87257	-0.196656	0.255826	0.53468	Down	1.43999	1.59814	1.55092	1.40295	1.43335	1.89625	76967	RIKEN cDNA 2700049A03 gene	protein_coding			GO:0005515,GO:0005737,GO:0005813,GO:0005814,GO:0005856,GO:0007224,GO:0030030,GO:0036064,GO:0042995,GO:0060271,GO:0070201	protein binding|cytoplasm|centrosome|centriole|cytoskeleton|smoothened signaling pathway|cell projection organization|ciliary basal body|cell projection|cilium assembly|regulation of establishment of protein localization
2700054A10Rik	13.3341	10.3599	16.3083	1.58268	0.662372	0.434629	0.702209	Up	0.133064	0.103077	0.0761025	0.0852994	0.0747294	0.0119834	72578	RIKEN cDNA 2700054A10 gene	non_coding			GO:0003674,GO:0005575,GO:0008150	molecular_function|cellular_component|biological_process
2700062C07Rik	375.951	368.369	383.533	1.04182	0.0591092	0.709052	0.868138	Up	10.6009	10.6399	9.67244	8.57724	8.99941	8.96165	68046	RIKEN cDNA 2700062C07 gene	protein_coding			GO:0003674,GO:0005575,GO:0008150	molecular_function|cellular_component|biological_process
2700068H02Rik	2.31086	3.67589	0.945831	0.259161	-1.94808	0.292323	0.57267	Down	0.0205296	0.019437	0.0215257	0.0579051	0.147961	0	72563	RIKEN cDNA 2700068H02 gene	non_coding			GO:0003674,GO:0005575,GO:0008150	molecular_function|cellular_component|biological_process
2700097O09Rik	223.1	238.416	207.785	0.871687	-0.198118	0.311352	0.59118	Down	4.24694	4.07892	5.11669	4.30008	4.79312	4.67235	72658	RIKEN cDNA 2700097O09 gene	protein_coding			GO:0008168	methyltransferase activity
2810001A02Rik	235.639	300.455	170.822	0.568357	-0.81513	2.99969e-06	7.92477e-05	Down	7.11745	7.11938	7.50498	11.1151	10.5989	12.5479	72146	RIKEN cDNA 2810001A02 gene	non_coding			GO:0003674,GO:0005575,GO:0008150	molecular_function|cellular_component|biological_process
2810001G20Rik	89.3901	99.2705	79.5098	0.800604	-0.32084	0.298947	0.578789	Down	2.13072	2.98454	2.20351	2.33259	2.46427	3.46973	66456	RIKEN cDNA 2810001G20 gene	non_coding			GO:0003674,GO:0005575,GO:0008150	molecular_function|cellular_component|biological_process
2810002D19Rik	65.1125	82.4727	47.7524	0.57902	-0.788314	0.0171615	0.093829	Down	1.081	0.855686	0.743247	1.49952	1.14949	1.49219	66457	RIKEN cDNA 2810002D19 gene	non_coding			GO:0003674,GO:0005575,GO:0008150	molecular_function|cellular_component|biological_process
2810004N23Rik	869.265	797.155	941.375	1.18102	0.240028	0.0597616	0.222008	Up	18.9531	19.5659	18.1369	13.0605	14.0675	15.9101	66523	RIKEN cDNA 2810004N23 gene	protein_coding			GO:0003674,GO:0005634,GO:0005694,GO:0008150,GO:0032040,GO:0042274	molecular_function|nucleus|chromosome|biological_process|small-subunit processome|ribosomal small subunit biogenesis
2810013P06Rik	545.984	626.565	465.402	0.742524	-0.42949	0.0295813	0.13757	Down	6.48382	6.13875	6.48571	5.91314	7.14308	10.1741	100503178	RIKEN cDNA 2810013P06 gene	non_coding			GO:0003674,GO:0005575,GO:0008150	molecular_function|cellular_component|biological_process
2810021J22Rik	479.019	467.522	490.516	1.04949	0.0696889	0.646997	0.837763	Up	2.67818	2.32968	2.504	2.21802	2.07557	2.08798	69944	RIKEN cDNA 2810021J22 gene	protein_coding	mmu05168	Herpes simplex virus 1 infection	GO:0000122,GO:0000977,GO:0001227	negative regulation of transcription by RNA polymerase II|RNA polymerase II transcription regulatory region sequence-specific DNA binding|DNA-binding transcription repressor activity, RNA polymerase II-specific			R-MMU-212436,R-MMU-73857,R-MMU-74160	Generic Transcription Pathway|RNA Polymerase II Transcription|Gene expression (Transcription)	zf-C2H2
2810025M15Rik	328.744	259.532	397.956	1.53277	0.616139	0.000839973	0.00915511	Up	8.63397	9.57164	9.51481	4.49366	5.23851	6.5457	69953	RIKEN cDNA 2810025M15 gene	non_coding			GO:0003674,GO:0005575,GO:0008150	molecular_function|cellular_component|biological_process
2810029C07Rik	118.406	129.359	107.453	0.829171	-0.270258	0.40129	0.674683	Down	1.58813	1.4399	1.5523	1.36661	1.15015	2.4932	100504687	RIKEN cDNA 2810029C07 gene	non_coding			GO:0003674,GO:0005575,GO:0008150	molecular_function|cellular_component|biological_process
2810030D12Rik	16.5196	16.5093	16.5299	0.995722	-0.00618554	0.993808	0.998425	Down	0.342093	0.728745	1.16575	0.442244	0.308193	1.31319	78335	RIKEN cDNA 2810030D12 gene	non_coding			GO:0003674,GO:0005575,GO:0008150	molecular_function|cellular_component|biological_process
2810032G03Rik	46.275	54.8673	37.6827	0.684894	-0.546048	0.221722	0.493245	Down	0.47698	0.402774	0.662328	0.472693	0.530921	1.03441	72669	RIKEN cDNA 2810032G03 gene	non_coding			GO:0003674,GO:0005575,GO:0008150	molecular_function|cellular_component|biological_process
2810039B14Rik	14.8632	9.95077	19.7757	2.00094	1.00068	0.139952	0.37924	Up	0.360896	0.356546	0.263241	0.162279	0.193868	0.0777205	72665	RIKEN cDNA 2810039B14 gene	protein_coding			GO:0003674,GO:0005575,GO:0008150	molecular_function|cellular_component|biological_process
2810047C21Rik1	28.7967	39.9296	17.6637	0.442554	-1.17607	0.0711986	0.249322	Down	0.0428173	0.243231	0.188559	0.314	0.352679	0.296912	105242405	RIKEN cDNA 2810047C21 gene 1	non_coding			GO:0003674,GO:0005575,GO:0008150	molecular_function|cellular_component|biological_process
2810403D21Rik	43.4163	46.3094	40.5232	0.875876	-0.191201	0.6049	0.812085	Down	1.30838	1.11487	0.932868	1.08251	1.13157	1.21835	69964	RIKEN cDNA 2810403D21 gene	non_coding			GO:0003674,GO:0005575,GO:0009611	molecular_function|cellular_component|response to wounding
2810408A11Rik	15.6033	10.4015	20.8051	1.99789	0.99848	0.104744	0.319067	Up	0.35165	0.202139	0.276535	0.10627	0.116377	0.149295	70419	RIKEN cDNA 2810408A11 gene	protein_coding			GO:0004864,GO:0043666	protein phosphatase inhibitor activity|regulation of phosphoprotein phosphatase activity
2810408B13Rik	23.4542	21.9876	24.9208	1.12949	0.175671	0.725902	0.875438	Up	0.0441275	0.0386843	0.0462688	0.030732	0.0252411	0.046952	76371	RIKEN cDNA 2810408B13 gene	protein_coding			GO:0003674,GO:0005575,GO:0008150	molecular_function|cellular_component|biological_process
2810408I11Rik	34.8876	28.0966	41.6786	1.48209	0.56763	0.27984	0.560903	Up	0.922103	1.99051	1.93369	1.31777	0.721546	0.876922	69941	RIKEN cDNA 2810408I11 gene	non_coding			GO:0003674,GO:0005575,GO:0008150	molecular_function|cellular_component|biological_process
2810414N06Rik	23.9029	29.5825	18.2234	0.615159	-0.700969	0.181395	0.441823	Down	0.465775	0.288337	0.281755	0.488446	0.368896	0.656621	102640772	RIKEN cDNA 2810414N06 gene	non_coding			GO:0003674,GO:0005575,GO:0008150	molecular_function|cellular_component|biological_process
2810429I04Rik	2.19036	2.17822	2.20251	1.02388	0.0340475	0.98227	0.994088	Up	0.045342	0.0286193	0.0316948	0.01421	0.0622459	0.0149724	76937	RIKEN cDNA 2810429I04 gene	non_coding			GO:0005575,GO:0035198,GO:0060038	cellular_component|miRNA binding|cardiac muscle cell proliferation
2810433D01Rik	18.2595	21.3698	15.1491	0.709587	-0.494949	0.39031	0.665087	Down	0.295709	0.298636	0.351399	0.50044	0.385654	0.292937	77132	RIKEN cDNA 2810433D01 gene	non_coding			GO:0003674,GO:0005575,GO:0008150	molecular_function|cellular_component|biological_process
2810454H06Rik	12.8933	8.41204	17.3745	2.06846	1.04855	0.18067	0.440857	Up	0.251347	0.0793236	0.185457	0.105029	0.0670933	0.0461096	72813	RIKEN cDNA 2810454H06 gene	non_coding			GO:0003674,GO:0005575,GO:0008150	molecular_function|cellular_component|biological_process
2810459M11Rik	503.104	521.65	484.557	0.928886	-0.106426	0.916852	0.967044	Down	0.339487	5.13523	6.57284	3.46646	4.45457	3.69935	72792	RIKEN cDNA 2810459M11 gene	protein_coding			GO:0005515,GO:0005575,GO:0008150	protein binding|cellular_component|biological_process
2900005J15Rik	12.0458	7.29128	16.8003	2.30044	1.20191	0.120937	0.34806	Up	0.284586	0.110226	0.298396	0.121621	0.0665936	0.0768871	67261	RIKEN cDNA 2900005J15 gene	non_coding			GO:0003674,GO:0005575,GO:0008150	molecular_function|cellular_component|biological_process
2900009J06Rik	9.11561	10.2955	7.93576	0.772488	-0.372415	0.676916	0.853559	Down	0.170033	0.536612	0.713133	0.373013	0.816977	0.449171	100502745	RIKEN cDNA 2900009J06 gene	non_coding			GO:0003674,GO:0005575,GO:0008150	molecular_function|cellular_component|biological_process
2900024J01Rik	2.30983	2.41969	2.19997	0.908172	-0.138963	0.92078	0.968362	Down	0.0399975	0.0568033	0.0419384	0.0376053	0.0411817	0.059434	102634584	RIKEN cDNA 2900024J01 gene	non_coding			GO:0003674,GO:0005575,GO:0008150	molecular_function|cellular_component|biological_process
2900026A02Rik	4056.28	4257.64	3854.93	0.905405	-0.143365	0.466141	0.725185	Down	10.5364	7.81736	7.00518	9.34207	6.82749	8.8581	243219	RIKEN cDNA 2900026A02 gene	protein_coding			GO:0003674,GO:0005575,GO:0008150	molecular_function|cellular_component|biological_process
2900041M22Rik	7.93661	5.3956	10.4776	1.92356	0.943781	0.333171	0.614572	Up	0.21524	0.129681	0.307751	0.128778	0.0201465	0.155071	78403	RIKEN cDNA 2900041M22 gene	non_coding			GO:0003674,GO:0005575,GO:0008150	molecular_function|cellular_component|biological_process
2900052L18Rik	21.3363	13.1148	29.5577	2.2458	1.16723	0.0476488	0.190321	Up	0.102641	0.105629	0.210564	0.0503488	0.0459477	0.0707331	102640779	RIKEN cDNA 2900052L18 gene	non_coding			GO:0003674,GO:0005575,GO:0008150	molecular_function|cellular_component|biological_process
2900060B14Rik	7.5204	9.95077	5.09004	0.51209	-0.965532	0.296756	0.577364	Down	0.176203	0.166826	0.369507	0.455578	0.54426	0.21819	68204	RIKEN cDNA 2900060B14 gene	non_coding			GO:0003674,GO:0005575,GO:0008150	molecular_function|cellular_component|biological_process
2900076A07Rik	124.168	127.623	120.713	0.944304	-0.0826769	0.808387	0.916049	Down	4.19786	2.54248	5.11357	3.80168	2.66956	4.77007	100504421	RIKEN cDNA 2900076A07 gene	non_coding			GO:0003674,GO:0005575,GO:0008150	molecular_function|cellular_component|biological_process
2900089D17Rik	29.1228	23.2426	35.0029	1.50335	0.588181	0.287054	0.568124	Up	0.105671	0.0774557	0.196578	0.0512777	0.0772123	0.0979268	67277	RIKEN cDNA 2900089D17 gene	non_coding			GO:0003674,GO:0005575,GO:0008150	molecular_function|cellular_component|biological_process
2900093K20Rik	42.8646	42.7894	42.9397	1.00155	0.00222856	0.995657	0.998783	Up	1.60193	2.1065	2.33287	1.38061	1.60354	2.46854	108168734	RIKEN cDNA 2900093K20 gene	non_coding			GO:0003674,GO:0005575,GO:0008150	molecular_function|cellular_component|biological_process
3010001F23Rik	6.05806	6.76781	5.34831	0.785631	-0.348076	0.726059	0.875438	Down	0.137209	0.129907	0.119889	0.172003	0.0470903	0.226538	75693	RIKEN cDNA 3010001F23 gene	non_coding			GO:0003674,GO:0005575,GO:0008150	molecular_function|cellular_component|biological_process
3010003L21Rik	36.469	32.3652	40.5727	1.2572	0.330211	0.523456	0.763533	Up	0.583743	0.481821	0.863173	0.450321	0.631847	0.266895	109163	RIKEN cDNA 3010003L21 gene	non_coding			GO:0003674,GO:0005575,GO:0008150	molecular_function|cellular_component|biological_process
3110009E18Rik	68.4503	71.3616	65.539	0.919537	-0.12102	0.695917	0.862389	Down	0.344308	0.321393	0.340677	0.259884	0.374474	0.345885	73103	RIKEN cDNA 3110009E18 gene	protein_coding			GO:0003674,GO:0005575,GO:0008150	molecular_function|cellular_component|biological_process
3110021A11Rik	6.99319	8.95715	5.02924	0.560748	-0.834576	0.378418	0.653396	Down	0.282778	0.089243	0.131778	0.354487	0.16175	0.280128	67289	RIKEN cDNA 3110021A11 gene	non_coding			GO:0003674,GO:0005575,GO:0008150	molecular_function|cellular_component|biological_process
3110040N11Rik	392.167	371.498	412.837	1.11144	0.152427	0.368721	0.64551	Up	8.06763	9.38416	9.90923	6.69853	7.50819	7.84671	67290	RIKEN cDNA 3110040N11 gene	protein_coding			GO:0003674,GO:0005737,GO:0008150	molecular_function|cytoplasm|biological_process
3110045C21Rik	13.1834	15.681	10.6859	0.678545	-0.559483	0.542908	0.775291	Down	0.347555	0.219373	0.218652	0.108923	0.143138	0.826316	67303	RIKEN cDNA 3110045C21 gene	non_coding			GO:0003674,GO:0005575,GO:0008150	molecular_function|cellular_component|biological_process
3110053B16Rik	137.433	140.732	134.135	0.951531	-0.0716779	0.812632	0.918426	Down	1.56538	1.64168	1.90648	1.24533	1.25218	2.37378	382686	RIKEN cDNA 3110053B16 gene	non_coding			GO:0003674,GO:0005575,GO:0008150	molecular_function|cellular_component|biological_process
3110056K07Rik	205.5	227.639	183.361	0.804782	-0.31333	0.250336	0.527421	Down	3.77346	2.4131	3.45332	2.81643	3.10132	4.86936	73204	RIKEN cDNA 3110056K07 gene	non_coding			GO:0003674,GO:0005575,GO:0008150	molecular_function|cellular_component|biological_process
3110070M22Rik	26.9354	27.7168	26.1541	0.940528	-0.0884574	0.862426	0.941448	Down	0.629482	0.640128	0.660027	0.438395	0.456083	0.970017	67304	RIKEN cDNA 3110070M22 gene	non_coding			GO:0003674,GO:0005575,GO:0008150	molecular_function|cellular_component|biological_process
3110082I17Rik	232.24	244.272	220.209	0.901815	-0.149097	0.400876	0.67447	Down	3.08582	3.26071	3.25	2.94012	3.21973	3.37078	73212	RIKEN cDNA 3110082I17 gene	protein_coding			GO:0003674,GO:0005575,GO:0008150	molecular_function|cellular_component|biological_process
3110083C13Rik	20.7064	14.5503	26.8625	1.84246	0.881634	0.0938494	0.297525	Up	0.809642	0.738162	1.00614	0.451092	0.33962	0.445585	73208	RIKEN cDNA 3110083C13 gene	non_coding			GO:0003674,GO:0005575,GO:0008150	molecular_function|cellular_component|biological_process
3300002I08Rik	422.89	503.729	342.051	0.679133	-0.558235	0.193258	0.457504	Down	0.759861	0.365942	0.173148	0.511903	0.518697	0.685171	69277	RIKEN cDNA 3300002I08 gene	protein_coding			GO:0003674,GO:0005575,GO:0008150	molecular_function|cellular_component|biological_process
3300005D01Rik	77.9925	98.6921	57.2929	0.581376	-0.782456	0.124632	0.355288	Down	0.636416	1.76877	1.29154	1.40902	2.91695	1.34225	78512	RIKEN cDNA 3300005D01 gene	non_coding			GO:0009611	response to wounding
3425401B19Rik	24.086	27.3288	20.8431	0.763335	-0.389612	0.459036	0.719759	Down	0.0518267	0.0946322	0.0970385	0.097454	0.102911	0.084346	100504518	RIKEN cDNA 3425401B19 gene	protein_coding			GO:0003674,GO:0005737,GO:0030018,GO:0070886	molecular_function|cytoplasm|Z disc|positive regulation of calcineurin-NFAT signaling cascade
3632454L22Rik	123.096	119.607	126.585	1.05735	0.0804517	0.822735	0.923575	Up	0.80679	0.649987	0.551699	0.739691	0.325047	0.635412	320606	RIKEN cDNA 3632454L22 gene	non_coding			GO:0003674,GO:0005575,GO:0008150	molecular_function|cellular_component|biological_process
3830403N18Rik	76.9239	96.01	57.8377	0.601489	-0.73339	0.0729591	0.253318	Down	0.829054	0.930966	1.779	2.15713	1.34988	1.71897	70691	RIKEN cDNA 3830403N18 gene	protein_coding			GO:0000795,GO:0002244,GO:0003674,GO:0007286,GO:0051321	synaptonemal complex|hematopoietic progenitor cell differentiation|molecular_function|spermatid development|meiotic cell cycle
3830406C13Rik	513.385	483.889	542.88	1.12141	0.16532	0.249157	0.526133	Up	1.87211	1.75067	2.0354	1.38584	1.41262	1.72419	218734	RIKEN cDNA 3830406C13 gene	protein_coding			GO:0003674,GO:0005575,GO:0008150,GO:0042995	molecular_function|cellular_component|biological_process|cell projection
3830408C21Rik	24.9148	18.6575	31.1721	1.6614	0.732396	0.254808	0.533467	Up	0.415675	0.262369	0.697352	0.234488	0.114128	0.398053	100040322	RIKEN cDNA 3830408C21 gene	non_coding			GO:0003674,GO:0005575,GO:0008150	molecular_function|cellular_component|biological_process
3830432H09Rik	27.1425	42.0784	12.2065	0.29079	-1.78195	0.000413521	0.00513202	Down	0.152517	0.175344	0.0913818	0.440429	0.403799	0.453264	320069	RIKEN cDNA 3830432H09 gene	non_coding			GO:0003674,GO:0005575,GO:0008150	molecular_function|cellular_component|biological_process
3930402G23Rik	90.7117	162.272	19.1516	0.117794	-3.08566	2.66729e-07	9.55431e-06	Down	0.0341094	0.169544	0.31294	0.954063	1.74718	1.19954	665306	RIKEN cDNA 3930402G23 gene	non_coding			GO:0003674,GO:0005575,GO:0008150	molecular_function|cellular_component|biological_process
4631405J19Rik	2.2466	0.701645	3.79155	5.42267	2.439	0.2449	0.521315	Up	0	0.141585	0.112	0	0.0219959	0.0211632	433456	RIKEN cDNA 4631405J19 gene	non_coding			GO:0003674,GO:0005575,GO:0008150	molecular_function|cellular_component|biological_process
4632404H12Rik	47.8296	46.6164	49.0428	1.0486	0.0684634	0.870144	0.945376	Up	0.472319	0.345934	0.569991	0.393798	0.256914	0.538518	74034	RIKEN cDNA 4632404H12 gene	non_coding			GO:0003674,GO:0005575,GO:0008150	molecular_function|cellular_component|biological_process
4632427E13Rik	16.0425	16.6675	15.4175	0.924783	-0.112813	0.859898	0.940453	Down	0.825509	0.521051	0.577044	0.887012	0.445211	0.50624	666737	RIKEN cDNA 4632427E13 gene	non_coding			GO:0003674,GO:0005575,GO:0008150	molecular_function|cellular_component|biological_process
4632428C04Rik	33.2085	44.0657	22.3513	0.506799	-0.980515	0.102839	0.315347	Down	0.227457	0.102549	0.442918	0.417522	0.557598	0.364812	100043102	RIKEN cDNA 4632428C04 gene	non_coding			GO:0003674,GO:0005575,GO:0008150	molecular_function|cellular_component|biological_process
4732416N19Rik	10.8294	9.57386	12.085	1.26566	0.33989	0.671962	0.85077	Up	0.381827	0.497072	0.950844	0.493612	0.540556	0.236406	320737	RIKEN cDNA 4732416N19 gene	non_coding			GO:0003674,GO:0005575,GO:0008150	molecular_function|cellular_component|biological_process
4732419C18Rik	77.6107	108.3	46.9212	0.433463	-1.20602	0.00376195	0.030112	Down	0.596707	0.294757	0.398973	0.528496	1.06848	1.07086	100042484	RIKEN cDNA 4732419C18 gene	non_coding			GO:0003674,GO:0005575,GO:0008150	molecular_function|cellular_component|biological_process
4732465J04Rik	2.07217	2.90096	1.24338	0.432162	-1.21036	0.562807	0.78753	Down	0.17445	0	0	0.0820082	0.224519	0.0432038	414105	RIKEN cDNA 4732465J04 gene	non_coding			GO:0003674,GO:0005575,GO:0008150	molecular_function|cellular_component|biological_process
4732471J01Rik	8.09721	8.26434	7.93007	0.955765	-0.0652725	0.938516	0.975186	Down	0.0486107	0.0345177	0.070083	0.0285645	0.0437936	0.0722326	654804	RIKEN cDNA 4732471J01 gene	non_coding			GO:0003674,GO:0005575,GO:0008150	molecular_function|cellular_component|biological_process
4732491K20Rik	80.1871	87.5629	72.8113	0.830383	-0.268151	0.429426	0.696566	Down	0.82027	0.462832	0.634195	0.66215	0.537444	0.870038	224523	RIKEN cDNA 4732491K20 gene	non_coding			GO:0003674,GO:0005575,GO:0008150	molecular_function|cellular_component|biological_process
4831440E17Rik	56.3473	43.6798	69.0148	1.57537	0.655689	0.179449	0.43895	Up	0.455456	0.266183	0.512931	0.137452	0.173682	0.401056	320965	RIKEN cDNA 4831440E17 gene	non_coding			GO:0003674,GO:0005575,GO:0008150	molecular_function|cellular_component|biological_process
4833407H14Rik	13.1138	10.9355	15.2921	1.39534	0.480617	0.542013	0.774581	Up	0.324939	0.533252	0.18171	0.122202	0.178431	0.386272	73899	RIKEN cDNA 4833407H14 gene	non_coding			GO:0003674,GO:0005575,GO:0008150	molecular_function|cellular_component|biological_process
4833411C07Rik	8.97745	13.7948	4.16004	0.300711	-1.73355	0.0601253	0.22309	Down	0.0437577	0.0621434	0.183524	0.287984	0.360425	0.195064	71624	RIKEN cDNA 4833411C07 gene	non_coding
4833412C05Rik	15.2481	17.5445	12.9517	0.739233	-0.435898	0.466889	0.725681	Down	0.33996	0.275887	0.381918	0.342458	0.475034	0.384885	73904	RIKEN cDNA 4833412C05 gene	non_coding			GO:0003674,GO:0005575,GO:0008150	molecular_function|cellular_component|biological_process
4833417C18Rik	8.33643	11.3119	5.36099	0.474889	-1.07434	0.284581	0.56537	Down	0.219319	0.018877	0.104528	0.168711	0.287398	0.177761	73906	RIKEN cDNA 4833417C18 gene	non_coding			GO:0003674,GO:0005575,GO:0008150	molecular_function|cellular_component|biological_process
4833418N02Rik	34.5351	27.5081	41.5621	1.51141	0.595893	0.159742	0.409903	Up	0.635973	0.862507	0.756946	0.500973	0.407039	0.425685	74597	RIKEN cDNA 4833418N02 gene	non_coding			GO:0003674,GO:0005575,GO:0008150	molecular_function|cellular_component|biological_process
4833419F23Rik	45.6698	51.2125	40.127	0.78137	-0.355921	0.452878	0.715105	Down	1.49253	0.876121	1.43976	1.03841	1.01423	2.36567	73915	RIKEN cDNA 4833419F23 gene	non_coding			GO:0003674,GO:0005575,GO:0008150	molecular_function|cellular_component|biological_process
4833420G17Rik	1063.54	1108.19	1018.88	0.919106	-0.121698	0.460541	0.721157	Down	9.30571	7.68709	10.3971	7.84872	8.0716	10.8305	67392	RIKEN cDNA 4833420G17 gene	protein_coding			GO:0003674,GO:0005575,GO:0008150	molecular_function|cellular_component|biological_process
4833422C13Rik	80.9206	156.222	5.61926	0.0361264	-4.7908	5.95134e-12	6.01889e-10	Down	0.060865	0.0132983	0.00981822	0.721911	1.00267	0.301473	373852	RIKEN cDNA 4833422C13 gene	non_coding			GO:0003674,GO:0005575,GO:0008150	molecular_function|cellular_component|biological_process
4833438C02Rik	66.9818	58.0159	75.9477	1.31207	0.391841	0.308174	0.587429	Up	1.10312	0.960859	1.48051	0.691428	1.0752	0.626528	100503392	RIKEN cDNA 4833438C02 gene	non_coding			GO:0003674,GO:0005575,GO:0008150	molecular_function|cellular_component|biological_process
4833439F03Rik	27.825	22.1319	33.5182	1.51197	0.596431	0.271038	0.551919	Up	0.288505	0.399221	0.488661	0.125192	0.239922	0.340763	105246973	RIKEN cDNA 4833439F03 gene	non_coding			GO:0003674,GO:0005575,GO:0008150	molecular_function|cellular_component|biological_process
4833439L19Rik	2794.5	3030.4	2558.6	0.844353	-0.244081	0.114136	0.336212	Down	15.735	17.2953	17.8295	14.4749	19.52	20.0509	97820	RIKEN cDNA 4833439L19 gene	protein_coding			GO:0003674,GO:0005737,GO:0008150,GO:0016491	molecular_function|cytoplasm|biological_process|oxidoreductase activity
4833447I15Rik	14.2359	12.0901	16.3817	1.34672	0.429447	0.604295	0.811564	Up	0.579723	0.349282	0.442076	0.34685	0.0542624	0.522082	74844	RIKEN cDNA 4833447I15 gene	non_coding			GO:0003674,GO:0005575,GO:0008150	molecular_function|cellular_component|biological_process
4921507P07Rik	41.6287	32.1838	51.0736	1.5823	0.662025	0.188362	0.451827	Up	0.585173	0.342195	0.469199	0.355995	0.124044	0.306894	70821	RIKEN cDNA 4921507P07 gene	protein_coding			GO:0003674,GO:0005737,GO:0005813,GO:0005856,GO:0008150	molecular_function|cytoplasm|centrosome|cytoskeleton|biological_process
4921515G04Rik	6.11794	6.02283	6.21305	1.02778	0.0395322	0.97548	0.991343	Up	0.0191854	0.0635752	0.0100582	0.00450948	0.014815	0.0665195	115488525	RIKEN cDNA 4921515G04 gene	non_coding			GO:0003674,GO:0005575,GO:0008150	molecular_function|cellular_component|biological_process
4921517D16Rik	1.27544	0.345832	2.20504	5.88698	2.55753	0.271629	0.552508	Up	0.0125215	0.00296379	0.00656457	0.00294316	0	0	70876	RIKEN cDNA 4921517D16 gene	non_coding			GO:0003674,GO:0005575,GO:0008150	molecular_function|cellular_component|biological_process
4921524J17Rik	936.002	834.543	1037.46	1.243	0.313832	0.012776	0.0758684	Up	19.4229	16.6877	18.0833	11.8124	12.5114	14.7491	66714	RIKEN cDNA 4921524J17 gene	protein_coding			GO:0003674,GO:0005575,GO:0008150	molecular_function|cellular_component|biological_process
4921525O09Rik	3.70511	5.20517	2.20504	0.423572	-1.23932	0.360887	0.638399	Down	0.0321496	0.00760965	0.0168548	0.00755668	0.0496521	0.0636966	74050	RIKEN cDNA 4921525O09 gene	non_coding			GO:0003674,GO:0005575,GO:0008150	molecular_function|cellular_component|biological_process
4921531C22Rik	78.0546	86.7254	69.3838	0.800026	-0.321881	0.337389	0.618782	Down	1.27005	0.731933	1.04218	1.29792	1.02338	1.05302	66730	RIKEN cDNA 4921531C22 gene	non_coding			GO:0003674,GO:0005575,GO:0008150	molecular_function|cellular_component|biological_process
4921536K21Rik	23.9836	24.8569	23.1103	0.93005	-0.104619	0.8418	0.93296	Down	0.281266	0.15217	0.305447	0.245555	0.248223	0.208972	67430	RIKEN cDNA 4921536K21 gene	protein_coding			GO:0003674,GO:0005575,GO:0008150	molecular_function|cellular_component|biological_process
4930405A21Rik	60.1856	56.5866	63.7846	1.12727	0.172835	0.588407	0.802195	Up	1.95586	1.85177	1.52422	1.41643	1.27901	1.54479	74846	RIKEN cDNA 4930405A21 gene	non_coding			GO:0003674,GO:0005575,GO:0008150	molecular_function|cellular_component|biological_process
4930405D11Rik	53.6903	66.4291	40.9515	0.616428	-0.697995	0.659394	0.84458	Down	0	1.1598	2.21361	1.64183	2.03949	1.16188	73922	RIKEN cDNA 4930405D11 gene	non_coding			GO:0003674,GO:0005575,GO:0008150	molecular_function|cellular_component|biological_process
4930412C18Rik	14.4001	16.3405	12.4597	0.764225	-0.387931	0.58944	0.802843	Down	0.0927632	0.13174	0.0347373	0.087215	0.102332	0.118149	320152	RIKEN cDNA 4930412C18 gene	non_coding			GO:0003674,GO:0005575,GO:0008150	molecular_function|cellular_component|biological_process
4930412M03Rik	5.8181	7.78193	3.85427	0.492738	-1.02111	0.494608	0.744698	Down	0.0261588	0.00825557	0.0731418	0	0.0538666	0.146844	100504140	RIKEN cDNA 4930412M03 gene	non_coding			GO:0003674,GO:0005575,GO:0008150	molecular_function|cellular_component|biological_process
4930413G21Rik	5.38668	2.51407	8.25928	3.31575	1.72933	0.165496	0.418458	Up	0.16882	0.0887974	0.236015	0.0705434	0.0579393	0	73951	RIKEN cDNA 4930413G21 gene	non_coding			GO:0003674,GO:0005575,GO:0008150	molecular_function|cellular_component|biological_process
4930417H01Rik	8.11981	6.78891	9.4507	1.38332	0.468136	0.604026	0.811496	Up	0.0568701	0.0999951	0.0851853	0.0687455	0.0167297	0.0724335	414106	RIKEN cDNA 4930417H01 gene	non_coding			GO:0003674,GO:0005575,GO:0008150	molecular_function|cellular_component|biological_process
4930426I24Rik	7.84059	6.92435	8.75683	1.26483	0.338945	0.73581	0.880168	Up	0.232318	0.0439908	0.0487181	0.0873691	0.0597989	0.0805492	100504512	RIKEN cDNA 4930426I24 gene	non_coding			GO:0003674,GO:0005575,GO:0008150	molecular_function|cellular_component|biological_process
4930426L09Rik	11.1606	15.7504	6.57078	0.41937	-1.2537	0.164052	0.416251	Down	0.159277	0.134045	0.0742247	0.0831947	0.473756	0.22791	74629	RIKEN cDNA 4930426L09 gene	non_coding			GO:0003674,GO:0005575,GO:0008150	molecular_function|cellular_component|biological_process
4930429B21Rik	13.0832	11.7415	14.4248	1.22767	0.295927	0.675278	0.85261	Up	0.215781	0.242604	0.155548	0.0760783	0.152742	0.227119	67576	RIKEN cDNA 4930429B21 gene	non_coding			GO:0003674,GO:0005575,GO:0008150	molecular_function|cellular_component|biological_process
4930431P22Rik	15.7219	21.3898	10.054	0.471181	-1.08565	0.0781123	0.264359	Down	0.331957	0.488896	0.348065	0.797596	0.797498	0.621153	73883	RIKEN cDNA 4930431P22 gene	non_coding			GO:0003674,GO:0005575,GO:0008150	molecular_function|cellular_component|biological_process
4930438A08Rik	2.09593	3.86518	0.326679	0.0877655	-3.5102	0.074191	0.256225	Down	0	0	0.0112779	0.0404507	0.0442977	0.0319655	73988	RIKEN cDNA 4930438A08 gene	protein_coding	mmu00250,mmu00270,mmu00280,mmu00350,mmu00360,mmu00380,mmu00400	Alanine, aspartate and glutamate metabolism|Cysteine and methionine metabolism|Valine, leucine and isoleucine degradation|Tyrosine metabolism|Phenylalanine metabolism|Tryptophan metabolism|Phenylalanine, tyrosine and tryptophan biosynthesis	GO:0001716,GO:0005575,GO:0009063,GO:0046592	L-amino-acid oxidase activity|cellular_component|amino acid catabolic process|polyamine oxidase activity
4930444M15Rik	15.2951	22.017	8.57328	0.388791	-1.36293	0.0497895	0.196067	Down	0.063446	0.150174	0.216205	0.253518	0.375615	0.361395	75789	RIKEN cDNA 4930444M15 gene	non_coding			GO:0003674,GO:0005575,GO:0008150	molecular_function|cellular_component|biological_process
4930444P10Rik	3.83766	1.07856	6.59676	6.22102	2.63715	0.0752421	0.25879	Up	0.170676	0.0538643	0.0745659	0	0.0292882	0.0140897	75799	RIKEN cDNA 4930444P10 gene	protein_coding			GO:0003674,GO:0005575,GO:0008150	molecular_function|cellular_component|biological_process
4930445E18Rik	143.595	119.818	167.373	1.39668	0.482002	0.104386	0.318382	Up	0.509622	0.440254	0.293031	0.289251	0.217621	0.29081	78115	RIKEN cDNA 4930445E18 gene	non_coding			GO:0003674,GO:0005575,GO:0008150	molecular_function|cellular_component|biological_process
4930445K14Rik	64.7274	55.7361	73.7186	1.32048	0.401058	0.244708	0.521128	Up	1.11347	0.901627	1.41329	0.619858	0.724063	0.986924	105244413	RIKEN cDNA 4930445K14 gene	non_coding			GO:0003674,GO:0005575,GO:0008150	molecular_function|cellular_component|biological_process
4930447C04Rik	61.6631	71.9912	51.3351	0.711465	-0.491135	0.292431	0.572825	Down	0.551473	0.399751	0.451744	0.607605	0.266156	0.913353	75801	RIKEN cDNA 4930447C04 gene	protein_coding			GO:0000801,GO:0003674,GO:0005694,GO:0006310,GO:0007129,GO:0007130,GO:0007275,GO:0007283,GO:0010705,GO:0030154,GO:0048477,GO:0051090,GO:0051321	central element|molecular_function|chromosome|DNA recombination|homologous chromosome pairing at meiosis|synaptonemal complex assembly|multicellular organism development|spermatogenesis|meiotic DNA double-strand break processing involved in reciprocal meiotic recombination|cell differentiation|oogenesis|regulation of DNA-binding transcription factor activity|meiotic cell cycle
4930447F24Rik	140.524	126.766	154.283	1.21921	0.285949	0.344293	0.625917	Up	3.18035	2.64131	3.27617	1.69616	2.98727	1.95297	76873	RIKEN cDNA 4930447F24 gene	non_coding			GO:0003674,GO:0005575,GO:0008150	molecular_function|cellular_component|biological_process
4930448E22Rik	3.90081	3.41499	4.38664	1.27889	0.354894	0.755826	0.890019	Up	0.0734591	0.0579581	0.0385118	0.0345328	0.0252113	0.0606422	102633321	RIKEN cDNA 4930448E22 gene	non_coding			GO:0003674,GO:0005575,GO:0008150	molecular_function|cellular_component|biological_process
4930453N24Rik	1074.07	1159.29	988.847	0.853079	-0.229248	0.0963741	0.302574	Down	5.25967	4.32024	4.22978	4.53058	4.71634	5.24095	67609	RIKEN cDNA 4930453N24 gene	protein_coding			GO:0003674,GO:0005634,GO:0006915,GO:0043065	molecular_function|nucleus|apoptotic process|positive regulation of apoptotic process
4930471E19Rik	9.69729	4.97482	14.4198	2.92423	1.54805	0.0629107	0.22993	Up	0.216066	0.306851	0.178004	0.0435307	0.111232	0.0611547	74912	RIKEN cDNA 4930471E19 gene	non_coding			GO:0003674,GO:0005575,GO:0008150	molecular_function|cellular_component|biological_process
4930473A02Rik	3.69495	5.5299	1.85999	0.337662	-1.56635	0.307051	0.586178	Down	0.0746582	0.0353425	0	0.0175482	0.115303	0.166407	321014	RIKEN cDNA 4930473A02 gene	non_coding			GO:0003674,GO:0005575,GO:0008150	molecular_function|cellular_component|biological_process
4930480K23Rik	29.3317	27.8106	30.8528	1.10942	0.149811	0.769708	0.897324	Up	0.343174	0.139248	0.205615	0.164617	0.180273	0.208138	75016	RIKEN cDNA 4930480K23 gene	non_coding			GO:0003674,GO:0005575,GO:0008150	molecular_function|cellular_component|biological_process
4930481A15Rik	30.6305	56.7742	4.48672	0.0783011	-3.67482	7.65043e-09	3.95915e-07	Down	0.0242941	0.0345018	0.114628	0.63955	0.63784	0.67386	74931	RIKEN cDNA 4930481A15 gene	non_coding			GO:0003674,GO:0005575,GO:0008150	molecular_function|cellular_component|biological_process
4930481B07Rik	43.8962	36.1604	51.632	1.42336	0.509301	0.291646	0.572001	Up	0.269242	0.14468	0.183118	0.0957821	0.0824146	0.201841	108168883	RIKEN cDNA 4930481B07 gene	non_coding			GO:0003674,GO:0005575,GO:0008150	molecular_function|cellular_component|biological_process
4930483J18Rik	1.92843	2.31533	1.54154	0.664268	-0.590162	0.814178	0.919146	Down	0	0.113797	0	0.0452019	0	0.119067	67638	RIKEN cDNA 4930483J18 gene	non_coding			GO:0003674,GO:0005575,GO:0008150	molecular_function|cellular_component|biological_process
4930486L24Rik	2014.15	720.878	3307.43	4.58791	2.19784	3.35598e-19	1.18525e-16	Up	68.8393	52.0463	80.2531	8.46392	14.1597	16.8113	214639	RIKEN cDNA 4930486L24 gene	protein_coding			GO:0004197,GO:0005576,GO:0005615,GO:0005764,GO:0006508,GO:0006955,GO:0008234,GO:0008656,GO:0010952,GO:0030054,GO:0051603,GO:2001235	cysteine-type endopeptidase activity|extracellular region|extracellular space|lysosome|proteolysis|immune response|cysteine-type peptidase activity|cysteine-type endopeptidase activator activity involved in apoptotic process|positive regulation of peptidase activity|cell junction|proteolysis involved in protein catabolic process|positive regulation of apoptotic signaling pathway
4930500F10Rik	25.3236	30.0028	20.6444	0.685928	-0.543871	0.324095	0.60476	Down	0.246547	0.155617	0.369301	0.397373	0.229671	0.37217	102636338	RIKEN cDNA 4930500F10 gene	non_coding			GO:0003674,GO:0005575,GO:0008150	molecular_function|cellular_component|biological_process
4930500G05Rik	15.3027	23.3603	7.24504	0.309097	-1.69387	0.0223513	0.113253	Down	0.212084	0.120478	0.155662	0.358918	0.240199	0.840384	75037	RIKEN cDNA 4930500G05 gene	non_coding			GO:0003674,GO:0005575,GO:0008150	molecular_function|cellular_component|biological_process
4930500H12Rik	1.27257	2.54515	0	0.0685229	-3.86727	0.225224	0.497693	Down	0	0	0	0.021157	0.0308921	0	74991	RIKEN cDNA 4930500H12 gene	non_coding			GO:0003674,GO:0005575,GO:0008150	molecular_function|cellular_component|biological_process
4930503L19Rik	293.661	252.647	334.675	1.32353	0.404394	0.211793	0.480623	Up	2.77933	1.57486	3.12025	1.95323	1.06949	2.02325	269033	RIKEN cDNA 4930503L19 gene	protein_coding			GO:0005576,GO:0008285	extracellular region|negative regulation of cell population proliferation
4930506C21Rik	3.91032	4.64064	3.18001	0.678008	-0.560627	0.677622	0.853692	Down	0.0539454	0.0766117	0.141408	0.0507189	0.0277712	0.293919	75060	RIKEN cDNA 4930506C21 gene	non_coding			GO:0003674,GO:0005575,GO:0008150	molecular_function|cellular_component|biological_process
4930507D05Rik	6.25461	5.6143	6.89492	1.23298	0.302153	0.738696	0.881185	Up	0.0958919	0.102137	0.0628406	0.0563479	0.0740482	0.0593708	74706	RIKEN cDNA 4930507D05 gene	non_coding			GO:0003674,GO:0005575,GO:0008150	molecular_function|cellular_component|biological_process
4930509E16Rik	2.35218	0.649466	4.05489	6.05036	2.59702	0.176196	0.434148	Up	0.0883236	0.14634	0.0463047	0	0	0.0437479	75115	RIKEN cDNA 4930509E16 gene	non_coding			GO:0003674,GO:0005575,GO:0008150	molecular_function|cellular_component|biological_process
4930509G22Rik	10.4724	8.59135	12.3535	1.43238	0.518419	0.541539	0.774215	Up	0.148399	0.0903221	0.177828	0.149489	0.0327412	0.0735039	105246071	RIKEN cDNA 4930509G22 gene	non_coding			GO:0003674,GO:0005575,GO:0008150	molecular_function|cellular_component|biological_process
4930511M06Rik	2.39162	2.8599	1.92333	0.672834	-0.571677	0.771429	0.898111	Down	0	0.0145098	0.0321381	0.0360219	0.0236687	0	75084	RIKEN cDNA 4930511M06 gene	non_coding			GO:0003674,GO:0005575,GO:0008150	molecular_function|cellular_component|biological_process
4930512B01Rik	1.64393	3.28785	0	0.0530485	-4.23655	0.158259	0.407458	Down	0	0	0	0	0.133384	0.036667	74724	RIKEN cDNA 4930512B01 gene	non_coding			GO:0003674,GO:0005575,GO:0008150	molecular_function|cellular_component|biological_process
4930512H18Rik	16.8184	15.5939	18.043	1.15912	0.213031	0.813894	0.919083	Up	0.026038	0.172566	0.170634	0.0306008	0.154151	0.103176	75111	RIKEN cDNA 4930512H18 gene	non_coding			GO:0003674,GO:0005575,GO:0008150	molecular_function|cellular_component|biological_process
4930512J16Rik	2.23923	2.55513	1.92333	0.756557	-0.402479	0.823517	0.923867	Down	0	0.0267873	0.0593318	0.0133004	0.0728267	0.0140139	75131	RIKEN cDNA 4930512J16 gene	non_coding			GO:0003674,GO:0005575,GO:0008150	molecular_function|cellular_component|biological_process
4930513N10Rik	31.2326	25.9483	36.517	1.40554	0.491127	0.298734	0.578789	Up	0.272084	0.444145	0.363987	0.273453	0.17388	0.241652	319960	RIKEN cDNA 4930513N10 gene	non_coding			GO:0003674,GO:0005575,GO:0008150	molecular_function|cellular_component|biological_process
4930515G01Rik	2.27365	1.36223	3.18508	2.31724	1.21241	0.485297	0.7377	Up	0.0840875	0.0199031	0.11021	0.0592937	0	0.0208249	67642	RIKEN cDNA 4930515G01 gene	non_coding			GO:0003674,GO:0005575,GO:0008150	molecular_function|cellular_component|biological_process
4930519F16Rik	2.80136	0.324733	5.27798	14.102	3.81783	0.110937	0.330212	Up	0	0.157057	0.0231913	0	0	0.0109554	75106	RIKEN cDNA 4930519F16 gene	protein_coding
4930520E11Rik	28.7968	23.5441	34.0495	1.45058	0.536633	0.380491	0.65514	Up	0.155988	0.142216	0.327114	0.0869085	0.202244	0.0915708	102634716	RIKEN cDNA 4930520E11 gene	non_coding			GO:0003674,GO:0005575,GO:0008150	molecular_function|cellular_component|biological_process
4930521O11Rik	9.34584	8.04511	10.6466	1.32703	0.408206	0.60237	0.810706	Up	0.218632	0.192212	0.114621	0.146826	0.112553	0.0928215	74715	RIKEN cDNA 4930521O11 gene	non_coding			GO:0003674,GO:0005575,GO:0008150	molecular_function|cellular_component|biological_process
4930522L14Rik	281.436	380.856	182.017	0.477774	-1.0656	7.21068e-10	4.7907e-08	Down	1.28728	1.37715	1.52514	2.44109	2.54595	2.86744	100041734	RIKEN cDNA 4930522L14 gene	protein_coding			GO:0000978,GO:0000981,GO:0005634,GO:0006357	RNA polymerase II cis-regulatory region sequence-specific DNA binding|DNA-binding transcription factor activity, RNA polymerase II-specific|nucleus|regulation of transcription by RNA polymerase II					zf-C2H2
4930522P08Rik	5.81187	5.6981	5.92565	1.03508	0.049746	0.967325	0.987686	Up	0.390183	0.81272	0.24547	0.0733693	0.241041	1.00497	78183	RIKEN cDNA 4930522P08 gene	non_coding			GO:0003674,GO:0005575,GO:0008150	molecular_function|cellular_component|biological_process
4930523C07Rik	682.284	967.059	397.51	0.410899	-1.28314	8.75183e-10	5.70172e-08	Down	3.05022	2.46828	2.69253	5.32501	4.61684	8.09643	67647	RIKEN cDNA 4930523C07 gene	protein_coding			GO:0003674,GO:0005575,GO:0008150	molecular_function|cellular_component|biological_process
4930524J08Rik	13.03	11.2736	14.7863	1.30749	0.386798	0.652015	0.840368	Up	0.324671	0.922177	0.638298	0.724975	0.125356	0.442239	75129	RIKEN cDNA 4930524J08 gene	protein_coding			GO:0003674,GO:0005575,GO:0008150	molecular_function|cellular_component|biological_process
4930525G20Rik	13.0553	14.7396	11.3709	0.768385	-0.380099	0.572175	0.792979	Down	0.114456	0.0833572	0.120009	0.140721	0.0725195	0.156992	320163	RIKEN cDNA 4930525G20 gene	non_coding			GO:0003674,GO:0005575,GO:0008150	molecular_function|cellular_component|biological_process
4930526I15Rik	216.876	239.065	194.687	0.814097	-0.296727	0.141034	0.380278	Down	3.4462	2.87126	3.13164	2.90888	3.34322	4.17255	75135	RIKEN cDNA 4930526I15 gene	non_coding			GO:0003674,GO:0005575,GO:0008150	molecular_function|cellular_component|biological_process
4930528A17Rik	7.81735	4.619	11.0157	2.40398	1.26542	0.148067	0.391583	Up	0.111539	0.176005	0.14294	0.0466078	0.0765607	0.0368311	67735	RIKEN cDNA 4930528A17 gene	non_coding			GO:0003674,GO:0005575,GO:0008150	molecular_function|cellular_component|biological_process
4930533K18Rik	2.47884	1.7802	3.17747	1.79454	0.843617	0.611652	0.81582	Up	0.0181744	0.0688287	0.0952815	0	0.0561374	0.0360082	75189	RIKEN cDNA 4930533K18 gene	non_coding			GO:0003674,GO:0005575,GO:0008150	molecular_function|cellular_component|biological_process
4930539J05Rik	4.60231	6.31708	2.88753	0.455362	-1.13491	0.357877	0.635952	Down	0.0525967	0.0995951	0.330894	0.494509	0.27077	0.156311	319587	RIKEN cDNA 4930539J05 gene	non_coding			GO:0003674,GO:0005575,GO:0008150	molecular_function|cellular_component|biological_process
4930539M17Rik	6.86405	4.56796	9.16015	2.00897	1.00645	0.357551	0.635797	Up	0.434171	0.146809	0.325171	0.262416	0.0957911	0.0307216	75149	RIKEN cDNA 4930539M17 gene	non_coding			GO:0003674,GO:0005575,GO:0008150	molecular_function|cellular_component|biological_process
4930544F09Rik	4.01282	1.09966	6.92597	6.45747	2.69097	0.0723605	0.252197	Up	0.0211323	0.00461716	0.0102267	0.00152834	0.00334738	0	75198	RIKEN cDNA 4930544F09 gene	non_coding			GO:0003674,GO:0005575,GO:0008150	molecular_function|cellular_component|biological_process
4930546K05Rik	3.4999	6.37811	0.621689	0.0984015	-3.34518	0.0531324	0.204933	Down	0.014862	0	0	0.0209597	0.0688592	0.0441682	78194	RIKEN cDNA 4930546K05 gene	non_coding			GO:0003674,GO:0005575,GO:0008150	molecular_function|cellular_component|biological_process
4930550C14Rik	15.8335	17.8721	13.7949	0.77078	-0.375609	0.554139	0.782476	Down	0.0894164	0.0752513	0.0520863	0.10275	0.0511465	0.0984205	75311	RIKEN cDNA 4930550C14 gene	protein_coding			GO:0005515,GO:0005737,GO:0005739,GO:0005741,GO:0005829,GO:0016020,GO:0090258,GO:1903215	protein binding|cytoplasm|mitochondrion|mitochondrial outer membrane|cytosol|membrane|negative regulation of mitochondrial fission|negative regulation of protein targeting to mitochondrion
4930552P12Rik	2.54275	2.84878	2.23671	0.786764	-0.345998	0.808976	0.916393	Down	0.0210724	0.00997548	0.0441898	0.0198121	0.0433925	0.0208749	77594	RIKEN cDNA 4930552P12 gene	non_coding			GO:0003674,GO:0005575,GO:0008150	molecular_function|cellular_component|biological_process
4930553P18Rik	2.48432	3.69866	1.26997	0.341263	-1.55104	0.421083	0.690002	Down	0	0.029571	0.0327488	0.0880955	0	0.0773512	75355	RIKEN cDNA 4930553P18 gene	non_coding			GO:0003674,GO:0005575,GO:0008150	molecular_function|cellular_component|biological_process
4930555A03Rik	1.97425	1.42439	2.52411	1.78678	0.837363	0.601666	0.810388	Up	0.0124874	0.0472911	0.0392799	0.0117405	0.0257141	0.0123703	100504653	RIKEN cDNA 4930555A03 gene	non_coding			GO:0003674,GO:0005575,GO:0008150	molecular_function|cellular_component|biological_process
4930556A17Rik	6.38144	11.817	0.945831	0.079987	-3.64409	0.00290687	0.0245256	Down	0.0224389	0.0212447	0.0235277	0.358646	0.184826	0.200057	102640520	RIKEN cDNA 4930556A17 gene	non_coding			GO:0003674,GO:0005575,GO:0008150	molecular_function|cellular_component|biological_process
4930556M19Rik	221.447	228.172	214.723	0.942193	-0.0859058	0.723433	0.874749	Down	1.42676	1.35083	1.33118	1.37553	1.469	1.02411	75259	RIKEN cDNA 4930556M19 gene	non_coding			GO:0003674,GO:0005575,GO:0008150	molecular_function|cellular_component|biological_process
4930556N13Rik	1.99928	2.74442	1.25414	0.456323	-1.13187	0.466893	0.725681	Down	0.0254336	0.0481601	0.0266678	0.0478249	0.0523732	0.100781	75285	RIKEN cDNA 4930556N13 gene	non_coding			GO:0003674,GO:0005575,GO:0008150	molecular_function|cellular_component|biological_process
4930558J18Rik	3.22135	1.07856	5.36414	5.05577	2.33793	0.116021	0.339667	Up	0.0640798	0.0728035	0.0806271	0	0.0263908	0.0126959	75323	RIKEN cDNA 4930558J18 gene	non_coding			GO:0003674,GO:0005575,GO:0008150	molecular_function|cellular_component|biological_process
4930562F17Rik	17.1008	20.1219	14.0798	0.7027	-0.509019	0.423878	0.692231	Down	0.250312	0.296238	0.147632	0.323593	0.354368	0.201472	75256	RIKEN cDNA 4930562F17 gene	non_coding			GO:0003674,GO:0005575,GO:0008150	molecular_function|cellular_component|biological_process
4930563E18Rik	3.17904	2.00058	4.35751	2.15918	1.11048	0.502401	0.750508	Up	0.152405	0.0641308	0.0177556	0	0.0174353	0.083876	75370	RIKEN cDNA 4930563E18 gene	non_coding			GO:0003674,GO:0005575,GO:0008150	molecular_function|cellular_component|biological_process
4930563E22Rik	20.8314	19.5135	22.1492	1.13909	0.187881	0.744637	0.88433	Up	0.166697	0.157825	0.233047	0.1418	0.196151	0.0943624	75304	RIKEN cDNA 4930563E22 gene	protein_coding			GO:0003674,GO:0005575,GO:0008150	molecular_function|cellular_component|biological_process
4930567H12Rik	2.36913	2.8599	1.87836	0.660673	-0.597992	0.733153	0.879461	Down	0.11015	0.026072	0.0288738	0.129453	0.0850585	0	75930	RIKEN cDNA 4930567H12 gene	non_coding			GO:0003674,GO:0005575,GO:0008150	molecular_function|cellular_component|biological_process
4930568A12Rik	1.37874	2.43081	0.326679	0.139292	-2.84381	0.226919	0.499355	Down	0	0	0.0179055	0.0802775	0.0175824	0.0169168	75883	RIKEN cDNA 4930568A12 gene	non_coding			GO:0003674,GO:0005575,GO:0008150	molecular_function|cellular_component|biological_process
4930577N17Rik	55.246	45.1898	65.3022	1.44436	0.530431	0.104856	0.319067	Up	1.00595	1.08847	1.20544	0.705584	0.624726	0.7118	67746	RIKEN cDNA 4930577N17 gene	non_coding			GO:0003674,GO:0005575,GO:0008150	molecular_function|cellular_component|biological_process
4930578G10Rik	1.98383	1.77022	2.19743	1.2494	0.32124	0.837978	0.931227	Up	0.0414801	0.15709	0.0869857	0.0779983	0.0854162	0.0410913	102638670	RIKEN cDNA 4930578G10 gene	non_coding			GO:0003674,GO:0005575,GO:0008150	molecular_function|cellular_component|biological_process
4930578L24Rik	13.0596	11.1231	14.996	1.34573	0.428391	0.590186	0.803315	Up	0.0881957	0.0759109	0.218578	0.0376913	0.099062	0.11914	105246496	RIKEN cDNA 4930578L24 gene	non_coding			GO:0003674,GO:0005575,GO:0008150	molecular_function|cellular_component|biological_process
4930578M01Rik	1.43909	0.701645	2.17653	3.11676	1.64005	0.492721	0.743431	Up	0	0.164711	0.0304018	0	0.0298533	0.0287232	75951	RIKEN cDNA 4930578M01 gene	non_coding			GO:0003674,GO:0005575,GO:0008150	molecular_function|cellular_component|biological_process
4930579G18Rik	11.6313	8.8428	14.4198	1.62334	0.698969	0.407202	0.678791	Up	0.252003	0.357888	0.207611	0.236931	0.0370663	0.178316	75913	RIKEN cDNA 4930579G18 gene	non_coding			GO:0003674,GO:0005575,GO:0008150	molecular_function|cellular_component|biological_process
4930579G24Rik	100.842	94.3984	107.285	1.13568	0.183555	0.488457	0.74048	Up	1.34829	1.50404	1.67966	1.00408	1.15455	1.42823	75939	RIKEN cDNA 4930579G24 gene	protein_coding			GO:0003674,GO:0005575,GO:0005737,GO:0005829,GO:0008150	molecular_function|cellular_component|cytoplasm|cytosol|biological_process
4930579K19Rik	17.5934	17.9964	17.1903	0.952452	-0.0702815	0.913805	0.965594	Down	0.410912	0.194522	0.646277	0.386335	0.32906	0.45229	75881	RIKEN cDNA 4930579K19 gene	non_coding			GO:0003674,GO:0005575,GO:0008150	molecular_function|cellular_component|biological_process
4930581F22Rik	86.7258	87.7706	85.681	0.975504	-0.0357798	0.921331	0.968362	Down	1.00726	0.60122	1.37758	0.936726	0.867995	0.911057	78934	RIKEN cDNA 4930581F22 gene	non_coding			GO:0003674,GO:0005575,GO:0008150	molecular_function|cellular_component|biological_process
4930590J08Rik	16.6432	18.3317	14.9547	0.818787	-0.28844	0.696854	0.862659	Down	0.0600115	0.075757	0.0209745	0.0752296	0.0617882	0.0330273	381798	RIKEN cDNA 4930590J08 gene	protein_coding			GO:0003674,GO:0005737,GO:0008150,GO:0016020	molecular_function|cytoplasm|biological_process|membrane
4930590L20Rik	3.21985	1.88456	4.55513	2.43785	1.28561	0.593737	0.805751	Up	0	0.0451884	0.650577	0	0.245707	0	75910	RIKEN cDNA 4930590L20 gene	non_coding			GO:0003674,GO:0005575,GO:0008150	molecular_function|cellular_component|biological_process
4930592C13Rik	3.48691	4.49468	2.47915	0.553075	-0.854453	0.565808	0.789511	Down	0.198929	0.113005	0	0.299249	0.0819272	0.118239	381498	RIKEN cDNA 4930592C13 gene	non_coding			GO:0003674,GO:0005575,GO:0008150	molecular_function|cellular_component|biological_process
4930594M22Rik	16.8697	16.653	17.0864	1.02527	0.0359971	0.964591	0.986646	Up	0.0434444	0.171385	0.174618	0.040846	0.134192	0.172149	105245866	RIKEN cDNA 4930594M22 gene	non_coding			GO:0003674,GO:0005575,GO:0008150	molecular_function|cellular_component|biological_process
4930597A21Rik	2.2989	3.98119	0.616616	0.155416	-2.68579	0.254191	0.532755	Down	0	0.0713432	0	0.141693	0	0.298589	75389	RIKEN cDNA 4930597A21 gene	non_coding			GO:0003674,GO:0005575,GO:0008150	molecular_function|cellular_component|biological_process
4930597O21Rik	2.93555	4.32702	1.54408	0.356819	-1.48673	0.437466	0.703933	Down	0.0197881	0.0749399	0	0.0930228	0	0.156821	75373	RIKEN cDNA 4930597O21 gene	non_coding			GO:0003674,GO:0005575,GO:0008150	molecular_function|cellular_component|biological_process
4930599N23Rik	12.9451	16.0158	9.87431	0.614929	-0.701509	0.321644	0.602888	Down	0.268961	0.169764	0.501354	0.39336	0.461539	0.503275	75379	RIKEN cDNA 4930599N23 gene	non_coding			GO:0003674,GO:0005575,GO:0008150	molecular_function|cellular_component|biological_process
4931406C07Rik	2472.03	1800.31	3143.76	1.746	0.804051	6.78919e-11	5.53333e-09	Up	29.5888	27.02	25.6587	13.9445	12.4702	15.831	70984	RIKEN cDNA 4931406C07 gene	protein_coding			GO:0005634,GO:0005654,GO:0008270,GO:0016604,GO:0016787,GO:0016788,GO:0046872	nucleus|nucleoplasm|zinc ion binding|nuclear body|hydrolase activity|hydrolase activity, acting on ester bonds|metal ion binding
4931408C20Rik	59.1325	15.7766	102.488	6.50969	2.70259	2.26162e-07	8.23302e-06	Up	0.376472	0.845099	0.738545	0.131306	0.0812746	0.0541369	210940	RIKEN cDNA 4931408C20 gene	protein_coding			GO:0003674,GO:0005575,GO:0008150	molecular_function|cellular_component|biological_process
4931408D14Rik	23.1875	21.7827	24.5924	1.1303	0.176706	0.853258	0.937657	Up	0.0243278	0.214976	0.391127	0.0533698	0.292227	0.152632	77059	RIKEN cDNA 4931408D14 gene	non_coding			GO:0003674,GO:0005575,GO:0008150	molecular_function|cellular_component|biological_process
4931414P19Rik	457.412	333.619	581.206	1.74318	0.801725	1.93227e-06	5.38761e-05	Up	2.8838	2.69733	2.42995	1.42938	1.35901	1.31187	74359	RIKEN cDNA 4931414P19 gene	protein_coding			GO:0005575,GO:0005576,GO:0010628,GO:0030154	cellular_component|extracellular region|positive regulation of gene expression|cell differentiation
4931415C17Rik	14.1445	20.7514	7.53752	0.364233	-1.45707	0.0369377	0.159951	Down	0.128513	0.0774285	0.0734992	0.28559	0.240577	0.150455	70966	RIKEN cDNA 4931415C17 gene	non_coding			GO:0003674,GO:0005575,GO:0008150	molecular_function|cellular_component|biological_process
4931440J10Rik	3.20309	2.32531	4.08087	1.73683	0.796456	0.61041	0.81516	Up	0.206609	0.0838343	0.0928433	0	0.0303894	0.175434	71000	RIKEN cDNA 4931440J10 gene	non_coding			GO:0003674,GO:0005575,GO:0008150	molecular_function|cellular_component|biological_process
4931440P22Rik	7.64075	7.80417	7.47733	0.955391	-0.0658364	0.944972	0.9787	Down	0.127182	0.160551	0.044451	0.0797167	0.0581987	0.181985	71004	RIKEN cDNA 4931440P22 gene	non_coding			GO:0003674,GO:0005575,GO:0008150	molecular_function|cellular_component|biological_process
4932415M13Rik	6.54268	0	13.0854	67.9885	6.08722	0.000456542	0.00558702	Up	0.137373	0.0243867	0.198054	0	0	0	211496	RIKEN cDNA 4932415M13 gene	non_coding			GO:0003674,GO:0005575,GO:0008150	molecular_function|cellular_component|biological_process
4932431P20Rik	1.77326	3.23567	0.310844	0.105004	-3.25149	0.198419	0.463761	Down	0.002798	0	0	0	0.017285	0.00831532	114675	RIKEN cDNA 4932431P20 gene	protein_coding
4932438H23Rik	11.6491	20.6847	2.61343	0.125257	-2.99704	0.0257619	0.125087	Down	0	0	0.0330233	0.0296113	0.105389	0.0974996	74387	RIKEN cDNA 4932438H23 gene	protein_coding			GO:0003674,GO:0005575,GO:0008150	molecular_function|cellular_component|biological_process
4933402J15Rik	1.63388	1.07856	2.18921	2.05468	1.03891	0.597369	0.808174	Up	0.0792119	0.0149993	0.0166111	0	0.0326228	0.0156939	74425	RIKEN cDNA 4933402J15 gene	non_coding			GO:0003674,GO:0005575,GO:0008150	molecular_function|cellular_component|biological_process
4933404O12Rik	161.395	170.075	152.715	0.899345	-0.153053	0.679405	0.854339	Down	0.940647	1.29825	0.951562	0.934211	1.52777	0.682468	66752	RIKEN cDNA 4933404O12 gene	non_coding			GO:0003674,GO:0005575,GO:0008150	molecular_function|cellular_component|biological_process
4933405D12Rik	13.2012	13.514	12.8884	0.953213	-0.0691291	0.918105	0.967663	Down	0.616368	0.389044	0.394947	0.579503	0.317308	0.407061	74057	RIKEN cDNA 4933405D12 gene	non_coding			GO:0003674,GO:0005575,GO:0008150	molecular_function|cellular_component|biological_process
4933406C10Rik	13.9407	13.1248	14.7566	1.12316	0.167558	0.791439	0.907832	Up	0.289878	0.259204	0.202629	0.151411	0.182392	0.271208	74076	RIKEN cDNA 4933406C10 gene	non_coding			GO:0003674,GO:0005575,GO:0008150	molecular_function|cellular_component|biological_process
4933407K13Rik	29.4973	25.3088	33.6859	1.32992	0.411335	0.362367	0.639727	Up	0.334961	0.236007	0.261369	0.212393	0.152388	0.19292	74396	RIKEN cDNA 4933407K13 gene	non_coding			GO:0003674,GO:0005575,GO:0008150	molecular_function|cellular_component|biological_process
4933407O12Rik	3.51516	4.23211	2.79822	0.665296	-0.587933	0.655202	0.84205	Down	0.0458559	0.130246	0.0240405	0.12934	0.094427	0.0454262	102635879	RIKEN cDNA 4933407O12 gene	protein_coding			GO:0003674,GO:0005575,GO:0008150	molecular_function|cellular_component|biological_process
4933411K16Rik	12.1217	10.3294	13.914	1.34278	0.425227	0.575726	0.794857	Up	0.131398	0.337671	0.354276	0.22943	0.115961	0.204547	66765	RIKEN cDNA 4933411K16 gene	protein_coding			GO:0003674,GO:0005575,GO:0008150	molecular_function|cellular_component|biological_process
4933412E12Rik	86.418	95.2144	77.6215	0.81601	-0.293342	0.28826	0.569308	Down	1.18983	1.18428	1.37552	1.27643	1.50777	1.31468	71086	RIKEN cDNA 4933412E12 gene	non_coding			GO:0003674,GO:0005575,GO:0008150	molecular_function|cellular_component|biological_process
4933412O06Rik	6.94908	10.099	3.79916	0.375565	-1.41287	0.132208	0.366848	Down	0.0702539	0.0886867	0.122771	0.33026	0.168779	0.162389	71071	RIKEN cDNA 4933412O06 gene	non_coding			GO:0003674,GO:0005575,GO:0008150	molecular_function|cellular_component|biological_process
4933413J09Rik	24.1842	33.5415	14.8269	0.442165	-1.17734	0.0436056	0.179956	Down	0.186348	0.0588102	0.122119	0.277404	0.239831	0.215369	71106	RIKEN cDNA 4933413J09 gene	non_coding			GO:0003674,GO:0005575,GO:0008150	molecular_function|cellular_component|biological_process
4933417D19Rik	3.48767	5.71866	1.25668	0.221112	-2.17715	0.107864	0.324888	Down	0.0427964	0.0202594	0.0224365	0.100592	0.176254	0.0635929	71186	RIKEN cDNA 4933417D19 gene	non_coding			GO:0003674,GO:0005575,GO:0008150	molecular_function|cellular_component|biological_process
4933417E11Rik	21.2218	33.6647	8.77898	0.261578	-1.93469	0.000981283	0.0104244	Down	0.168425	0.318923	0.176598	0.656028	0.89183	0.738892	71134	RIKEN cDNA 4933417E11 gene	non_coding			GO:0003674,GO:0005575,GO:0008150	molecular_function|cellular_component|biological_process
4933417O13Rik	27.2223	42.8966	11.5481	0.26956	-1.89132	0.00117829	0.0121207	Down	0.206802	0.310011	0.108419	0.648112	0.496825	0.973105	71153	RIKEN cDNA 4933417O13 gene	non_coding			GO:0003674,GO:0005575,GO:0008150	molecular_function|cellular_component|biological_process
4933421O10Rik	121.106	133.712	108.5	0.811011	-0.302206	0.204014	0.471202	Down	0.689905	0.801935	0.852302	0.802775	0.815825	0.974409	100504166	RIKEN cDNA 4933421O10 gene	non_coding			GO:0003674,GO:0005575,GO:0008150	molecular_function|cellular_component|biological_process
4933422A05Rik	3.36071	2.49297	4.22845	1.69755	0.763451	0.662711	0.846234	Up	0	0.0183619	0.244022	0.0547023	0.0599048	0.0192123	71133	RIKEN cDNA 4933422A05 gene	non_coding			GO:0003674,GO:0005575,GO:0008150	molecular_function|cellular_component|biological_process
4933424G05Rik	11.6108	17.2648	5.9567	0.345151	-1.5347	0.0511562	0.199811	Down	0.150707	0.0713432	0.0632079	0.340064	0.155169	0.238871	74456	RIKEN cDNA 4933424G05 gene	non_coding			GO:0003674,GO:0005575,GO:0008150	molecular_function|cellular_component|biological_process
4933424G06Rik	2.74031	1.70806	3.77256	2.19646	1.13518	0.48558	0.7377	Up	0.103304	0.0279448	0.0464217	0.0555005	0	0.0146195	71166	RIKEN cDNA 4933424G06 gene	protein_coding			GO:0003674,GO:0005575,GO:0008150	molecular_function|cellular_component|biological_process
4933425B07Rik	2.35752	3.75084	0.964202	0.254237	-1.97576	0.255005	0.533553	Down	0.0136544	0	0.0286339	0.0770264	0.0140586	0.0541057	74458	RIKEN cDNA 4933425B07 gene	non_coding			GO:0003674,GO:0005575,GO:0008150	molecular_function|cellular_component|biological_process
4933426B08Rik	11.6415	16.0064	7.27671	0.452371	-1.14442	0.127671	0.359914	Down	0.026148	0.0185673	0.0308439	0.0399492	0.0302874	0.0809467	115488815	RIKEN cDNA 4933426B08 gene	non_coding			GO:0003674,GO:0005575,GO:0008150	molecular_function|cellular_component|biological_process
4933427D14Rik	416.358	425.681	407.034	0.9558	-0.0652199	0.686299	0.857917	Down	2.16491	1.90569	2.47197	1.92579	1.93668	2.26014	74477	RIKEN cDNA 4933427D14 gene	protein_coding			GO:0003674,GO:0005737,GO:0005813,GO:0005829,GO:0005856,GO:0007099,GO:0034451,GO:0060271,GO:0061824,GO:0071539	molecular_function|cytoplasm|centrosome|cytosol|cytoskeleton|centriole replication|centriolar satellite|cilium assembly|cytosolic ciliogenesis|protein localization to centrosome
4933427E11Rik	3.05695	2.34641	3.76749	1.58843	0.667597	0.622322	0.822068	Up	0.108313	0.0820388	0.0681412	0.0203669	0.0223039	0.107298	66769	RIKEN cDNA 4933427E11 gene	non_coding			GO:0003674,GO:0005575,GO:0008150	molecular_function|cellular_component|biological_process
4933430I17Rik	22.1793	29.1517	15.2068	0.520546	-0.941901	0.0709095	0.24864	Down	0.0449737	0.0319352	0.058945	0.0713539	0.0723518	0.0891044	214106	RIKEN cDNA 4933430I17 gene	protein_coding			GO:0003674,GO:0005575,GO:0008150	molecular_function|cellular_component|biological_process
4933431E20Rik	113.634	81.4617	145.805	1.78795	0.838307	0.00999035	0.0633236	Up	0.734428	0.520356	0.999555	0.301809	0.360559	0.467363	329735	RIKEN cDNA 4933431E20 gene	non_coding			GO:0003674,GO:0005575,GO:0008150	molecular_function|cellular_component|biological_process
4933432I09Rik	1.64063	1.09966	2.1816	2.023	1.0165	0.592614	0.804879	Up	0.0342427	0.0648406	0.0179521	0.0160973	0.0352564	0	66779	RIKEN cDNA 4933432I09 gene	non_coding			GO:0003674,GO:0005575,GO:0008150	molecular_function|cellular_component|biological_process
4933433G15Rik	5.2572	6.67343	3.84097	0.571521	-0.807121	0.577456	0.796349	Down	0.114043	0	0.167408	0.128667	0.0234839	0.293733	71274	RIKEN cDNA 4933433G15 gene	non_coding			GO:0003674,GO:0005575,GO:0008150	molecular_function|cellular_component|biological_process
4933433H22Rik	3.73403	1.44549	6.02257	4.23091	2.08097	0.136628	0.374238	Up	0.1029	0.0556708	0.123307	0.0276417	0.0302705	0	74473	RIKEN cDNA 4933433H22 gene	non_coding			GO:0003674,GO:0005575,GO:0008150	molecular_function|cellular_component|biological_process
4933434E20Rik	2372.48	2512.09	2232.86	0.888911	-0.169889	0.0822612	0.273674	Down	34.3506	33.2525	33.2929	33.0747	32.9128	35.542	99650	RIKEN cDNA 4933434E20 gene	protein_coding			GO:0001701,GO:0003674,GO:0005739,GO:0005794,GO:0005829,GO:0006909	in utero embryonic development|molecular_function|mitochondrion|Golgi apparatus|cytosol|phagocytosis
4933439C10Rik	176.743	165.73	187.756	1.13122	0.177886	0.506763	0.754449	Up	2.1788	1.52304	2.36993	1.53158	1.23696	2.04744	74476	RIKEN cDNA 4933439C10 gene	non_coding			GO:0003674,GO:0005575,GO:0008150	molecular_function|cellular_component|biological_process
4933439K11Rik	3.479	2.50295	4.45505	1.7928	0.842215	0.511898	0.758071	Up	0.111789	0.0793798	0.205124	0.0262757	0.115099	0.0553707	71319	RIKEN cDNA 4933439K11 gene	non_coding			GO:0003674,GO:0005575,GO:0008150	molecular_function|cellular_component|biological_process
4933440N22Rik	26.9226	26.1331	27.7121	1.0636	0.0889543	0.868138	0.944777	Up	0.233709	0.465833	0.374022	0.26599	0.392603	0.243703	74471	RIKEN cDNA 4933440N22 gene	protein_coding			GO:0003674,GO:0005575,GO:0008150	molecular_function|cellular_component|biological_process
5031425E22Rik	207.588	193.385	221.792	1.14579	0.19634	0.508295	0.7555	Up	1.26223	0.926441	1.89415	1.09419	0.870373	1.21598	269630	RIKEN cDNA 5031425E22 gene	non_coding			GO:0003674,GO:0005575,GO:0008150	molecular_function|cellular_component|biological_process
5031425F14Rik	2.07416	1.04748	3.10083	2.97095	1.57092	0.401209	0.674683	Up	0.112524	0.0456579	0	0.0151134	0.0165507	0.0159241	319684	RIKEN cDNA 5031425F14 gene	non_coding			GO:0003674,GO:0005575,GO:0008150	molecular_function|cellular_component|biological_process
5031434O11Rik	20.2905	26.7044	13.8766	0.519196	-0.945649	0.120593	0.347652	Down	0.159315	0.16161	0.178977	0.43866	0.187465	0.22546	100039684	RIKEN cDNA 5031434O11 gene	non_coding			GO:0003674,GO:0005575,GO:0008150	molecular_function|cellular_component|biological_process
5031439G07Rik	3931.48	4096.53	3766.44	0.919533	-0.121027	0.418546	0.687536	Down	15.9984	14.0638	13.2446	14.0069	14.9763	12.945	223739	RIKEN cDNA 5031439G07 gene	protein_coding			GO:0003674,GO:0005575,GO:0008150	molecular_function|cellular_component|biological_process
5033403F01Rik	27.5346	30.0039	25.0653	0.833158	-0.263338	0.634092	0.829943	Down	0.499093	0.327137	0.704457	0.739959	0.335991	0.551464	75958	RIKEN cDNA 5033403F01 gene	non_coding			GO:0003674,GO:0005575,GO:0008150	molecular_function|cellular_component|biological_process
5033406O09Rik	116.048	116.457	115.639	0.99261	-0.0107005	0.971552	0.989542	Down	1.44497	1.64168	2.48792	1.45864	1.75397	1.80811	77675	RIKEN cDNA 5033406O09 gene	non_coding
5033417F24Rik	26.6427	24.1558	29.1296	1.20361	0.26737	0.6611	0.845573	Up	0.162336	0.512321	0.567376	0.292534	0.250713	0.388634	75995	RIKEN cDNA 5033417F24 gene	non_coding			GO:0003674,GO:0005575,GO:0008150	molecular_function|cellular_component|biological_process
5033421B08Rik	134.424	155.304	113.545	0.731394	-0.451278	0.117339	0.341896	Down	0.921121	0.621963	1.0332	0.886169	1.22041	1.02567	75990	RIKEN cDNA 5033421B08 gene	non_coding			GO:0003674,GO:0005575,GO:0008150	molecular_function|cellular_component|biological_process
5033430I15Rik	22.7997	26.5883	19.011	0.711977	-0.490098	0.41577	0.685269	Down	0.728583	0.459872	0.909448	0.97858	0.428659	1.23729	76000	RIKEN cDNA 5033430I15 gene	non_coding			GO:0003674,GO:0005575,GO:0008150	molecular_function|cellular_component|biological_process
5330438D12Rik	19.3736	22.7314	16.0158	0.703653	-0.507064	0.357918	0.635952	Down	0.403408	0.309189	0.261847	0.397341	0.316458	0.532836	327824	RIKEN cDNA 5330438D12 gene	protein_coding
5330439K02Rik	3.4278	3.03807	3.81753	1.24295	0.313764	0.804069	0.914603	Up	0.199734	0.189105	0.418853	0.187788	0.0685492	0.329771	108168267	RIKEN cDNA 5330439K02 gene	non_coding			GO:0003674,GO:0005575,GO:0008150	molecular_function|cellular_component|biological_process
5430400D12Rik	3.0802	3.00699	3.15341	1.04019	0.0568457	0.97115	0.989315	Up	0.0284871	0.00449518	0.0149347	0.0178555	0	0.0235168	71339	RIKEN cDNA 5430400D12 gene	non_coding			GO:0003674,GO:0005575,GO:0008150	molecular_function|cellular_component|biological_process
5430401H09Rik	11.2928	8.57742	14.0082	1.64423	0.717413	0.433992	0.701573	Up	0.136026	0.091224	0.0237711	0.0266438	0.0758621	0.0336878	100504461	RIKEN cDNA 5430401H09 gene	non_coding			GO:0003674,GO:0005575,GO:0008150	molecular_function|cellular_component|biological_process
5430402O13Rik	11.629	15.9548	7.30331	0.456445	-1.13149	0.13842	0.376648	Down	0.104462	0.197806	0.301211	0.515625	0.295776	0.362191	73183	RIKEN cDNA 5430402O13 gene	non_coding			GO:0003674,GO:0005575,GO:0008150	molecular_function|cellular_component|biological_process
5430403G16Rik	192.776	233.453	152.1	0.65153	-0.618096	0.0559988	0.2127	Down	1.1321	0.968639	1.95202	1.63207	2.22763	1.65317	77200	RIKEN cDNA 5430403G16 gene	protein_coding			GO:0000978,GO:0000981,GO:0001227,GO:0005634,GO:0005654,GO:0006357	RNA polymerase II cis-regulatory region sequence-specific DNA binding|DNA-binding transcription factor activity, RNA polymerase II-specific|DNA-binding transcription repressor activity, RNA polymerase II-specific|nucleus|nucleoplasm|regulation of transcription by RNA polymerase II					zf-C2H2
5430403N17Rik	22.385	31.6203	13.1498	0.417744	-1.25931	0.0376449	0.162379	Down	0.144214	0.185302	0.0972073	0.242122	0.445449	0.224497	330737	RIKEN cDNA 5430403N17 gene	non_coding
5430405H02Rik	81.0724	82.8145	79.3303	0.956139	-0.0647077	0.839561	0.931972	Down	1.49878	1.17151	1.71769	1.1142	1.18428	1.83002	74487	RIKEN cDNA 5430405H02 gene	non_coding			GO:0003674,GO:0005575,GO:0008150	molecular_function|cellular_component|biological_process
5430416N02Rik	57.5339	62.2658	52.802	0.846558	-0.240319	0.506006	0.753767	Down	2.60463	1.67053	2.77507	2.64634	1.98968	2.7883	100503199	RIKEN cDNA 5430416N02 gene	non_coding			GO:0003674,GO:0005575,GO:0009611	molecular_function|cellular_component|response to wounding
5430421F17Rik	18.5913	21.9143	15.2682	0.694492	-0.525971	0.492936	0.743431	Down	0.0458359	0.206134	0.300375	0.204699	0.165175	0.351899	74489	RIKEN cDNA 5430421F17 gene	non_coding			GO:0003674,GO:0005575,GO:0008150	molecular_function|cellular_component|biological_process
5430437J10Rik	1.57887	0.649466	2.50828	3.75748	1.90977	0.370212	0.646771	Up	0.0451087	0.0854161	0.0472975	0	0	0.0446859	71432	RIKEN cDNA 5430437J10 gene	non_coding			GO:0003674,GO:0005575,GO:0008150	molecular_function|cellular_component|biological_process
5530601H04Rik	139.914	142.859	136.97	0.958177	-0.0616353	0.849213	0.935919	Down	1.02177	0.793932	1.24868	0.602898	0.993982	1.28445	71445	RIKEN cDNA 5530601H04 gene	non_coding			GO:0003674,GO:0005575,GO:0008150	molecular_function|cellular_component|biological_process
5730405A17Rik	10.2701	7.43784	13.1024	1.76379	0.818683	0.483583	0.736505	Up	0.00593375	0.0842694	0.155542	0.0669462	0.0427659	0.0117563	102638389	RIKEN cDNA 5730405A17 gene	non_coding			GO:0003674,GO:0005575,GO:0008150	molecular_function|cellular_component|biological_process
5730405O15Rik	12.8622	15.555	10.1693	0.650287	-0.620851	0.460098	0.720965	Down	0.326135	0.168425	0.46631	0.195128	0.274738	0.881124	70489	RIKEN cDNA 5730405O15 gene	non_coding			GO:0003674,GO:0005575,GO:0008150	molecular_function|cellular_component|biological_process
5730408K05Rik	16.6513	12.5569	20.7456	1.66432	0.734937	0.294447	0.575208	Up	1.30122	1.81554	1.36436	0.450725	1.41026	0.542748	67531	RIKEN cDNA 5730408K05 gene	non_coding			GO:0003674,GO:0005575,GO:0008150	molecular_function|cellular_component|biological_process
5730409E04Rik	199.791	221.369	178.212	0.805239	-0.312511	0.135057	0.371695	Down	1.72629	1.75613	1.69452	1.54534	2.0043	2.2286	230757	RIKEN cDNA 5730409E04Rik gene	protein_coding			GO:0003674,GO:0005575,GO:0008150	molecular_function|cellular_component|biological_process
5730419F03Rik	9.73744	16.6792	2.79568	0.16809	-2.5727	0.0193924	0.10199	Down	0.0106514	0.0705919	0.0111683	0.240345	0.0548338	0.211032	70537	RIKEN cDNA 5730419F03 gene	non_coding			GO:0003674,GO:0005575,GO:0008150	molecular_function|cellular_component|biological_process
5730420D15Rik	2.60686	3.28785	1.92587	0.587746	-0.766734	0.666018	0.847832	Down	0.022249	0.021065	0.0933146	0	0.160354	0.044081	70523	RIKEN cDNA 5730420D15 gene	non_coding			GO:0003674,GO:0005575,GO:0008150	molecular_function|cellular_component|biological_process
5730455P16Rik	429.87	454.802	404.938	0.8906	-0.167151	0.250675	0.52773	Down	2.41805	2.35906	2.48194	2.19356	2.49546	2.60856	70591	RIKEN cDNA 5730455P16 gene	protein_coding			GO:0003674,GO:0005794,GO:0005802,GO:0005829,GO:0006886,GO:0031410,GO:0099041	molecular_function|Golgi apparatus|trans-Golgi network|cytosol|intracellular protein transport|cytoplasmic vesicle|vesicle tethering to Golgi
5730460C07Rik	22.8454	11.7737	33.917	2.87638	1.52425	0.0316863	0.144105	Up	0.157733	0.638082	0.736722	0.134817	0.147639	0.198869	70594	RIKEN cDNA 5730460C07 gene	non_coding			GO:0003674,GO:0005575,GO:0008150	molecular_function|cellular_component|biological_process
5730480H06Rik	19.097	16.4271	21.7668	1.31766	0.397979	0.606167	0.812581	Up	0.424412	0.258316	0.36554	0.242267	0.0468189	0.43545	70592	RIKEN cDNA 5730480H06 gene	non_coding			GO:0003674,GO:0005575,GO:0008150	molecular_function|cellular_component|biological_process
5730507C01Rik	53.9785	31.7711	76.186	2.39664	1.26101	0.561925	0.787217	Up	1.67215	0.00654198	0.01449	0.0194893	0.0284571	0.616046	236366	RIKEN cDNA 5730507C01 gene	protein_coding			GO:0000122,GO:0000978,GO:0001227,GO:0001817,GO:0002682,GO:0005654	negative regulation of transcription by RNA polymerase II|RNA polymerase II cis-regulatory region sequence-specific DNA binding|DNA-binding transcription repressor activity, RNA polymerase II-specific|regulation of cytokine production|regulation of immune system process|nucleoplasm					zf-C2H2
5730552O08Rik	22.0792	12.4514	31.7069	2.55266	1.352	0.171929	0.427666	Up	0.0333736	0.303335	0.328934	0.012551	0.137446	0.085958	115488900	RIKEN cDNA 5730552O08 gene	non_coding			GO:0003674,GO:0005575,GO:0008150	molecular_function|cellular_component|biological_process
5830408C22Rik	2.4685	3.99117	0.945831	0.235156	-2.08831	0.204573	0.472014	Down	0.0749241	0.0709367	0.0785597	0.140886	0.0771423	0.667997	74744	RIKEN cDNA 5830408C22 gene	non_coding			GO:0003674,GO:0005575,GO:0008150	molecular_function|cellular_component|biological_process
5830428M24Rik	2.7874	3.66477	1.91003	0.523933	-0.932546	0.5861	0.80138	Down	0.0507201	0.0240104	0.0797718	0	0.208887	0.0502447	76062	RIKEN cDNA 5830428M24 gene	non_coding			GO:0003674,GO:0005575,GO:0008150	molecular_function|cellular_component|biological_process
5830432E09Rik	5.83692	6.37811	5.29573	0.835729	-0.258893	0.806095	0.915043	Down	0.123219	0.133327	0.0369136	0.0496495	0.163114	0.104626	67765	RIKEN cDNA 5830432E09 gene	non_coding			GO:0003674,GO:0005575,GO:0008150	molecular_function|cellular_component|biological_process
5830433I10Rik	9.91111	9.02044	10.8018	1.19471	0.256664	0.75977	0.891468	Up	0.0284984	0.0215854	0.0478101	0.0401909	0.0146711	0.0169388	108168347	RIKEN cDNA 5830433I10 gene	non_coding			GO:0003674,GO:0005575,GO:0008150	molecular_function|cellular_component|biological_process
5830444B04Rik	67.8398	61.875	73.8047	1.1953	0.257376	0.740146	0.882015	Up	0.656638	0.994708	0.249582	0.416721	0.895804	0.0813105	641454	RIKEN cDNA 5830444B04 gene	non_coding			GO:0003674,GO:0005575,GO:0008150	molecular_function|cellular_component|biological_process
5830448L01Rik	75.5993	68.2325	82.966	1.21472	0.280619	0.390618	0.665147	Up	1.05317	1.49569	1.51026	0.815445	0.940836	1.2581	115488304	RIKEN cDNA 5830448L01 gene	non_coding			GO:0003674,GO:0005575,GO:0008150	molecular_function|cellular_component|biological_process
5830454E08Rik	8.27411	8.39094	8.15729	0.974065	-0.0379097	0.965068	0.986833	Down	0.176974	0.469156	0.259786	0.366057	0.255099	0.210379	76100	RIKEN cDNA 5830454E08 gene	non_coding			GO:0003674,GO:0005575,GO:0008150	molecular_function|cellular_component|biological_process
5930403L14Rik	5.45825	4.90154	6.01496	1.22828	0.296641	0.773199	0.89899	Up	0.0185298	0.0307013	0.0388578	0.00871075	0.0286175	0.0275342	320939	RIKEN cDNA 5930403L14 gene	non_coding			GO:0003674,GO:0005575,GO:0008150	molecular_function|cellular_component|biological_process
5930403N24Rik	5.54557	5.7403	5.35084	0.925996	-0.110923	0.915077	0.966091	Down	0.0594986	0.0402372	0.0445612	0.0239743	0.0262543	0.0926215	100040846	RIKEN cDNA 5930403N24 gene	non_coding			GO:0003674,GO:0005575,GO:0008150	molecular_function|cellular_component|biological_process
5930430L01Rik	107.592	143.853	71.3307	0.495927	-1.0118	0.0132129	0.0778426	Down	0.323286	0.474739	0.691783	1.05452	1.01216	0.581691	319982	RIKEN cDNA 5930430L01 gene	non_coding			GO:0003674,GO:0005575,GO:0008150	molecular_function|cellular_component|biological_process
5930438M14Rik	3.13257	3.15355	3.1116	0.99075	-0.0134077	0.992392	0.997848	Down	0.0431297	0.051043	0.0113056	0.0608252	0.0222033	0.0106814	328324	RIKEN cDNA 5930438M14 gene	non_coding
6030407O03Rik	5.80794	7.52994	4.08594	0.545392	-0.874636	0.457769	0.718735	Down	0.131419	0.013825	0.0459319	0.054915	0.180413	0.0723262	109198	RIKEN cDNA 6030407O03 gene	non_coding			GO:0003674,GO:0005575,GO:0008150	molecular_function|cellular_component|biological_process
6030426L16Rik	47.6182	47.6588	47.5776	1.00014	0.00019795	0.999667	0.999887	Up	0.482595	0.260266	0.179346	0.241224	0.314483	0.266268	628850	RIKEN cDNA 6030426L16 gene	protein_coding			GO:0003674,GO:0005575,GO:0008150	molecular_function|cellular_component|biological_process
6030440G07Rik	20.6679	10.16	31.1757	3.07804	1.62201	0.00291054	0.024536	Up	0.794004	0.797308	0.782075	0.180973	0.272504	0.238352	77878	RIKEN cDNA 6030440G07 gene	non_coding			GO:0003674,GO:0005575,GO:0008150	molecular_function|cellular_component|biological_process
6030443J06Rik	15.6926	17.0849	14.3002	0.833066	-0.263498	0.706268	0.866997	Down	0.0973112	0.0460662	0.133919	0.0743365	0.0688822	0.156649	320719	RIKEN cDNA 6030443J06 gene	non_coding			GO:0003674,GO:0005575,GO:0008150	molecular_function|cellular_component|biological_process
6030458C11Rik	984.204	922.906	1045.5	1.13297	0.180116	0.176148	0.434139	Up	3.17601	2.81786	3.46177	2.3824	2.52965	2.53565	77877	RIKEN cDNA 6030458C11 gene	protein_coding			GO:0003674,GO:0005575,GO:0008150	molecular_function|cellular_component|biological_process
6030466F02Rik	13.662	16.9484	10.3756	0.614066	-0.703534	0.324115	0.60476	Down	0.128374	0.277811	0.192291	0.344846	0.339878	0.181673	234863	RIKEN cDNA 6030466F02 gene	non_coding			GO:0003674,GO:0005575,GO:0008150	molecular_function|cellular_component|biological_process
6030468B19Rik	3.41437	3.28785	3.54089	1.08228	0.114073	0.945578	0.978968	Up	0.0214681	0.0406511	0.180078	0	0.154725	0.0425337	77727	RIKEN cDNA 6030468B19 gene	protein_coding			GO:0002250,GO:0002313,GO:0002376,GO:0004888,GO:0005125,GO:0005576,GO:0005615,GO:0007166,GO:0050776,GO:2000558	adaptive immune response|mature B cell differentiation involved in immune response|immune system process|transmembrane signaling receptor activity|cytokine activity|extracellular region|extracellular space|cell surface receptor signaling pathway|regulation of immune response|positive regulation of immunoglobulin production in mucosal tissue
6230400D17Rik	14.5842	15.8609	13.3075	0.834032	-0.261826	0.729082	0.877409	Down	0.265884	0.297504	0.456195	0.36361	0.124435	0.622564	76133	RIKEN cDNA 6230400D17 gene	non_coding			GO:0003674,GO:0005575,GO:0008150	molecular_function|cellular_component|biological_process
6330403K07Rik	443.579	257.361	629.798	2.44887	1.29212	0.00189162	0.0175939	Up	5.87517	11.0315	15.8752	3.32664	5.96438	2.52694	103712	RIKEN cDNA 6330403K07 gene	protein_coding			GO:0003674,GO:0005575,GO:0008150	molecular_function|cellular_component|biological_process
6330415G19Rik	8.67649	2.41969	14.9333	6.1459	2.61962	0.00719998	0.0495531	Up	0.0948116	0.179532	0.28581	0.0222852	0.0244046	0.0352211	320020	RIKEN cDNA 6330415G19 gene	non_coding			GO:0003674,GO:0005575,GO:0008150	molecular_function|cellular_component|biological_process
6330418K02Rik	42.8489	45.8309	39.8668	0.867519	-0.205033	0.615313	0.818222	Down	1.41961	1.20966	1.86063	1.70175	1.09623	1.8282	69004	RIKEN cDNA 6330418K02 gene	non_coding			GO:0003674,GO:0005575,GO:0008150	molecular_function|cellular_component|biological_process
6330537M06Rik	3.94966	3.8552	4.04413	1.05347	0.0751516	0.952449	0.981658	Up	0.10709	0.0724223	0.016041	0.0863018	0.0472547	0.0303105	115486873	RIKEN cDNA 6330537M06 gene	non_coding
6430411K18Rik	9.72132	8.59021	10.8524	1.25907	0.332362	0.751768	0.88796	Up	0.0199988	0.246148	0.419384	0.188026	0.102954	0.198113	76880	RIKEN cDNA 6430411K18 gen	non_coding			GO:0003674,GO:0005575,GO:0008150	molecular_function|cellular_component|biological_process
6430548M08Rik	794.073	890.874	697.272	0.78292	-0.353063	0.0117408	0.0713414	Down	3.32593	2.94602	2.82616	3.10764	3.57292	3.72345	234797	RIKEN cDNA 6430548M08 gene	protein_coding			GO:0003674,GO:0005575,GO:0008150	molecular_function|cellular_component|biological_process
6430550D23Rik	18.3309	19.3398	17.3219	0.89457	-0.160734	0.81628	0.920178	Down	0.221061	0.0822236	0.13245	0.222685	0.0812878	0.125137	320095	RIKEN cDNA 6430550D23 gene	protein_coding			GO:0003836,GO:0006486,GO:0010706,GO:0016020,GO:0097503	beta-galactoside (CMP) alpha-2,3-sialyltransferase activity|protein glycosylation|ganglioside biosynthetic process via lactosylceramide|membrane|sialylation
6430571L13Rik	336.495	272.768	400.222	1.46766	0.553522	0.00523643	0.0388201	Up	5.21433	4.2246	3.61969	2.59656	2.54642	2.81753	235599	RIKEN cDNA 6430571L13 gene	protein_coding			GO:0003674,GO:0005575,GO:0008150,GO:0016020	molecular_function|cellular_component|biological_process|membrane
6430573P05Rik	17.2955	11.8176	22.7734	1.91301	0.935842	0.191513	0.455661	Up	0.211161	0.166603	0.258309	0.11581	0.0271766	0.156887	115489693	RIKEN cDNA 6430573P05 gene	non_coding			GO:0003674,GO:0005575,GO:0008150	molecular_function|cellular_component|biological_process
6430584L05Rik	2.02194	3.11135	0.932533	0.30078	-1.73322	0.380333	0.655016	Down	0.0250381	0	0	0.0313874	0.0171863	0.0248035	330324	RIKEN cDNA 6430584L05 gene	non_coding
6430590A07Rik	5.15482	7.19804	3.1116	0.432706	-1.20854	0.314814	0.595416	Down	0.0998988	0.118228	0.0261866	0.305253	0.0514282	0.148444	619719	RIKEN cDNA 6430590A07 gene	non_coding			GO:0003674,GO:0005575,GO:0008150	molecular_function|cellular_component|biological_process
6430710C18Rik	31.6243	36.3975	26.8511	0.739181	-0.436	0.395846	0.669645	Down	0.473038	0.21788	0.402156	0.372625	0.579186	0.35462	76218	RIKEN cDNA 6430710C18 gene	non_coding			GO:0003674,GO:0005575,GO:0008150	molecular_function|cellular_component|biological_process
6530402F18Rik	31.5603	31.0896	32.031	1.03178	0.0451383	0.924518	0.969591	Up	0.300238	0.162434	0.160615	0.184346	0.182952	0.169956	76220	RIKEN cDNA 6530402F18 gene	non_coding			GO:0003674,GO:0005575,GO:0008150	molecular_function|cellular_component|biological_process
6720468P15Rik	5.1187	7.11251	3.12489	0.438453	-1.18951	0.298083	0.578325	Down	0.029466	0.0836934	0.0308958	0.0554072	0.0606766	0.189734	78073	RIKEN cDNA 6720468P15 gene	non_coding			GO:0003674,GO:0005575,GO:0008150	molecular_function|cellular_component|biological_process
6720483E21Rik	2.11904	2.34641	1.89166	0.798343	-0.324919	0.83411	0.929426	Down	0.0469614	0.0444621	0.0492401	0.0220763	0.0241758	0.116303	77741	RIKEN cDNA 6720483E21 gene	non_coding			GO:0003674,GO:0005575,GO:0008150	molecular_function|cellular_component|biological_process
6720489N17Rik	41.7374	42.4459	41.0289	0.96621	-0.0495919	0.90956	0.963956	Down	0.229733	0.179348	0.114101	0.159152	0.128641	0.199631	211378	RIKEN cDNA 6720489N17 gene	protein_coding			GO:0003674,GO:0005575,GO:0008150	molecular_function|cellular_component|biological_process
6820408C15Rik	4.76787	1.66586	7.86989	4.63353	2.21211	0.0792849	0.266815	Up	0.0350411	0.0608232	0.0489886	0.0109818	0	0.0173564	228778	RIKEN cDNA 6820408C15 gene	protein_coding			GO:0003674,GO:0005575,GO:0008150	molecular_function|cellular_component|biological_process
8030431J09Rik	2.32625	3.06915	1.58335	0.512526	-0.964304	0.509868	0.756776	Down	0.00090542	0.000428617	0.000949354	0.000851267	0.000932225	0.00224234	105244251	RIKEN cDNA 8030431J09 gene	non_coding			GO:0003674,GO:0005575,GO:0008150	molecular_function|cellular_component|biological_process
8030453O22Rik	32.5307	25.8195	39.242	1.52447	0.608307	0.21712	0.487683	Up	0.683882	0.456183	0.798551	0.379942	0.480088	0.261751	77209	RIKEN cDNA 8030453O22 gene	non_coding			GO:0003674,GO:0005575,GO:0008150	molecular_function|cellular_component|biological_process
8030455M16Rik	1.56983	2.82882	0.310844	0.119905	-3.06003	0.243455	0.519807	Down	0.0291556	0	0	0.164471	0.0600376	0	77171	RIKEN cDNA 8030455M16 gene	non_coding			GO:0003674,GO:0005575,GO:0008150	molecular_function|cellular_component|biological_process
8030474K03Rik	47.3218	62.4401	32.2034	0.51513	-0.956993	0.15354	0.399582	Down	0.492307	0.0650382	0.624237	0.570505	0.648338	0.816603	382231	RIKEN cDNA 8030474K03 gene	protein_coding			GO:0003674,GO:0005575,GO:0008150	molecular_function|cellular_component|biological_process
8430423G03Rik	2.29185	2.31533	2.26838	0.968766	-0.0457803	0.982414	0.994118	Down	0	0.0389652	0.258915	0.077388	0	0.203849	71473	RIKEN cDNA 8430423G03 gene	non_coding			GO:0003674,GO:0005575,GO:0008150	molecular_function|cellular_component|biological_process
8430426J06Rik	30.3332	52.4805	8.1858	0.156156	-2.67894	1.62144e-07	6.14712e-06	Down	0.193212	0.18293	0.180078	1.21104	1.06097	0.893208	78102	RIKEN cDNA 8430426J06 gene	non_coding			GO:0003674,GO:0005575,GO:0008150	molecular_function|cellular_component|biological_process
8430429K09Rik	101.303	111.307	91.2984	0.821236	-0.284132	0.321805	0.602904	Down	1.10976	1.06998	0.757951	1.1104	1.05876	1.02876	71523	RIKEN cDNA 8430429K09 gene	non_coding			GO:0003674,GO:0005575,GO:0008150	molecular_function|cellular_component|biological_process
8430432A02Rik	6.61261	5.12305	8.10217	1.57696	0.657144	0.53441	0.769763	Up	0.0884871	0.284845	0.0742247	0.116473	0.0364427	0.105189	108167597	RIKEN cDNA 8430432A02 gene	non_coding			GO:0003674,GO:0005575,GO:0008150	molecular_function|cellular_component|biological_process
9030404E10Rik	1.82653	1.44549	2.20758	1.53939	0.622363	0.768244	0.896436	Up	0.108761	0	0.0456153	0.0409023	0.0447923	0	71528	RIKEN cDNA 9030404E10 gene	non_coding			GO:0003674,GO:0005575,GO:0008150	molecular_function|cellular_component|biological_process
9030607J07Rik	3.74114	5.30069	2.1816	0.414182	-1.27166	0.324836	0.605657	Down	0.0252021	0.0477217	0.0132125	0.094779	0.0648705	0.0249659	105244793	RIKEN cDNA 9030607J07 gene	non_coding			GO:0003674,GO:0005575,GO:0008150	molecular_function|cellular_component|biological_process
9030607L20Rik	1.42989	0.670565	2.18921	3.21732	1.68586	0.417182	0.68623	Up	0.0150517	0.00285014	0.00315642	0.0028303	0	0.00298213	105244333	RIKEN cDNA 9030607L20 gene	non_coding			GO:0003674,GO:0005575,GO:0008150	molecular_function|cellular_component|biological_process
9030616G12Rik	3.49987	2.0117	4.98804	2.46316	1.30051	0.483906	0.736654	Up	0	0.504181	0.128853	0.11554	0	0.121738	77699	RIKEN cDNA 9030616G12 gene	non_coding			GO:0003674,GO:0005575,GO:0008150	molecular_function|cellular_component|biological_process
9030622O22Rik	92.008	109.471	74.5447	0.680314	-0.555728	0.461281	0.721807	Down	0.0162726	0.102711	0.309016	0.200592	0.121004	0.243593	100043820	RIKEN cDNA 9030622O22 gene	non_coding			GO:0003674,GO:0005575,GO:0008150	molecular_function|cellular_component|biological_process
9030624G23Rik	67.7973	67.3671	68.2276	1.01181	0.016938	0.977561	0.992385	Up	0.583945	0.16586	0.157443	0.211764	0.158897	0.442118	66808	RIKEN cDNA 9030624G23 gene	protein_coding			GO:0003674,GO:0005575,GO:0008150	molecular_function|cellular_component|biological_process
9130001E16Rik	2.29224	1.69694	2.88753	1.68234	0.750468	0.634339	0.830021	Up	0.00981649	0.0185881	0.0617569	0.00922936	0.0101071	0.0291735	71575	RIKEN cDNA 9130001E16 gene	non_coding			GO:0003674,GO:0005575,GO:0008150	molecular_function|cellular_component|biological_process
9130008F23Rik	55.8619	47.7865	63.9373	1.33643	0.418385	0.197999	0.463103	Up	0.840476	0.807279	0.8174	0.480996	0.501657	0.675732	71583	RIKEN cDNA 9130008F23 gene	protein_coding			GO:0001835,GO:0003674,GO:0005575	blastocyst hatching|molecular_function|cellular_component
9130015G15Rik	3.20412	2.86988	3.53835	1.2363	0.306028	0.849749	0.936048	Up	0	0.0297951	0.0879919	0.0295877	0.0432022	0.0103917	108167511	RIKEN cDNA 9130015G15 gene	non_coding			GO:0003674,GO:0005575,GO:0008150	molecular_function|cellular_component|biological_process
9130019O22Rik	87.2861	89.0517	85.5205	0.958603	-0.0609949	0.8344	0.929517	Down	0.549295	0.603529	0.682607	0.599328	0.439878	0.678505	78921	RIKEN cDNA 9130019O22 gene	protein_coding	mmu05168	Herpes simplex virus 1 infection	GO:0000978,GO:0000981,GO:0003712,GO:0005634,GO:0006357,GO:0071385,GO:0140297	RNA polymerase II cis-regulatory region sequence-specific DNA binding|DNA-binding transcription factor activity, RNA polymerase II-specific|transcription coregulator activity|nucleus|regulation of transcription by RNA polymerase II|cellular response to glucocorticoid stimulus|DNA-binding transcription factor binding			R-MMU-212436,R-MMU-73857,R-MMU-74160	Generic Transcription Pathway|RNA Polymerase II Transcription|Gene expression (Transcription)	zf-C2H2
9130019P16Rik	2.33475	2.39859	2.27092	0.939219	-0.090466	0.959766	0.984772	Down	0.00586232	0	0.0368807	0.00551169	0.0120718	0.0232295	100042056	RIKEN cDNA 9130019P16 gene	non_coding			GO:0003674,GO:0005575,GO:0008150	molecular_function|cellular_component|biological_process
9130023H24Rik	157.045	144.567	169.523	1.17446	0.232	0.323411	0.604511	Up	1.32189	1.27936	1.33984	0.863078	1.17956	0.95303	100043133	RIKEN cDNA 9130023H24 gene	protein_coding			GO:0000977,GO:0000981,GO:0003674,GO:0005575,GO:0005634,GO:0006357,GO:0008150	RNA polymerase II transcription regulatory region sequence-specific DNA binding|DNA-binding transcription factor activity, RNA polymerase II-specific|molecular_function|cellular_component|nucleus|regulation of transcription by RNA polymerase II|biological_process					zf-C2H2
9130024F11Rik	6.79042	8.56744	5.0134	0.588626	-0.764578	0.450736	0.713429	Down	0.0705428	0.0200366	0.0221898	0.0464266	0.0871576	0.0349409	329160	RIKEN cDNA 9130024F11 gene	non_coding			GO:0003674,GO:0005575,GO:0008150	molecular_function|cellular_component|biological_process
9130204K15Rik	78.8	48.0509	109.549	2.28477	1.19205	0.00846626	0.0560455	Up	1.19639	1.38443	1.25444	0.708227	0.536064	0.230451	105242790	RIKEN cDNA 9130204K15 gene	non_coding			GO:0003674,GO:0005575,GO:0008150	molecular_function|cellular_component|biological_process
9130214F15Rik	1.63135	0.722745	2.53995	3.55763	1.83092	0.412319	0.682711	Up	0	0.0445616	0.0493503	0.0110628	0.012115	0	102632957	RIKEN cDNA 9130214F15 gene	non_coding			GO:0003674,GO:0005575,GO:0008150	molecular_function|cellular_component|biological_process
9130230L23Rik	47.8758	48.4409	47.3107	0.977704	-0.032531	0.949681	0.980576	Down	0.488346	0.873341	1.34648	0.578174	1.15459	0.734613	231253	RIKEN cDNA 9130230L23 gene	non_coding			GO:0003674,GO:0005575,GO:0008150	molecular_function|cellular_component|biological_process
9130401M01Rik	642.468	610.657	674.278	1.10457	0.143489	0.304691	0.584039	Up	14.5254	13.1627	15.2302	10.8988	12.1009	11.6826	75758	RIKEN cDNA 9130401M01 gene	protein_coding			GO:0003674,GO:0005575,GO:0008150	molecular_function|cellular_component|biological_process
9230009I02Rik	25.2994	37.6997	12.8991	0.34136	-1.55063	0.0108757	0.067366	Down	0.343022	0.303116	0.287734	0.51601	0.517994	1.4725	619293	RIKEN cDNA 9230009I02 gene	non_coding			GO:0003674,GO:0005575,GO:0008150	molecular_function|cellular_component|biological_process
9230110K08Rik	2.08905	2.27313	1.90496	0.831244	-0.266657	0.914266	0.965889	Down	0	0.0581295	0.0643762	0	0	0.141917	102631977	RIKEN cDNA 9230110K08 gene	non_coding			GO:0003674,GO:0005575,GO:0008150	molecular_function|cellular_component|biological_process
9230114K14Rik	47.7076	54.6054	40.8099	0.747104	-0.42062	0.288189	0.569225	Down	0.69533	0.493744	0.416611	0.525329	0.575289	0.836416	414108	RIKEN cDNA 9230114K14 gene	non_coding			GO:0003674,GO:0005575,GO:0008150	molecular_function|cellular_component|biological_process
9230116L04Rik	1.71804	3.43609	0	0.0505495	-4.30616	0.0603088	0.223452	Down	0	0	0	0.0618523	0.0338674	0.0651705	321017	RIKEN cDNA 9230116L04 gene	non_coding			GO:0003674,GO:0005575,GO:0008150	molecular_function|cellular_component|biological_process
9230116N13Rik	10.4803	9.11255	11.8481	1.30511	0.384176	0.631923	0.828911	Up	0.200655	0.20185	0.0657474	0.0825361	0.129122	0.111811	320054	RIKEN cDNA 9230116N13 gene	non_coding			GO:0003674,GO:0005575,GO:0008150	molecular_function|cellular_component|biological_process
9330020H09Rik	27.8425	26.1425	29.5424	1.12938	0.175537	0.774337	0.899543	Up	0.130418	0.225164	0.361975	0.0937663	0.229064	0.250791	100048895	RIKEN cDNA 9330020H09 gene	non_coding			GO:0003674,GO:0005575,GO:0008150	molecular_function|cellular_component|biological_process
9330102E08Rik	84.5404	76.9022	92.1786	1.19612	0.258367	0.501164	0.749257	Up	0.861345	0.54367	0.594926	0.501322	0.295615	0.71106	330427	RIKEN cDNA 9330102E08 gene	non_coding			GO:0003674,GO:0005575,GO:0008150	molecular_function|cellular_component|biological_process
9330104G04Rik	44.6259	40.8106	48.4413	1.1867	0.24696	0.578354	0.796746	Up	0.352998	0.646143	0.801942	0.46464	0.448254	0.442941	320950	RIKEN cDNA 9330104G04 gene	non_coding			GO:0003674,GO:0005575,GO:0008150	molecular_function|cellular_component|biological_process
9330133O14Rik	89.6089	82.4411	96.7767	1.17372	0.231091	0.434589	0.702209	Up	0.7924	1.04149	1.01657	0.82389	0.64309	0.701859	100689703	RIKEN cDNA 9330133O14 gene	non_coding			GO:0003674,GO:0005575,GO:0008150	molecular_function|cellular_component|biological_process
9330136K24Rik	6.36935	5.38281	7.35588	1.37264	0.456952	0.681782	0.855421	Up	0.0318639	0.0603363	0.155914	0.0199721	0.0984219	0.0420871	319870	RIKEN cDNA 9330136K24 gene	non_coding			GO:0003674,GO:0005575,GO:0008150	molecular_function|cellular_component|biological_process
9330151L19Rik	87.6153	90.0481	85.1825	0.943663	-0.0836566	0.804827	0.914797	Down	0.939965	0.841043	1.00724	0.864323	0.56366	1.23813	414085	RIKEN cDNA 9330151L19 gene	non_coding			GO:0003674,GO:0005575,GO:0008150	molecular_function|cellular_component|biological_process
9330159F19Rik	2.00581	2.43081	1.58082	0.64913	-0.62342	0.701692	0.864164	Down	0.00410143	0.00776631	0.00860089	0.0192806	0.00422286	0.00406299	212448	RIKEN cDNA 9330159F19 gene	protein_coding			GO:0003674,GO:0005575,GO:0008150	molecular_function|cellular_component|biological_process
9330159M07Rik	10.7821	8.90436	12.6598	1.41101	0.496732	0.64933	0.838949	Up	0.0559937	0.150206	0.166347	0.0350965	0.00960857	0.203386	319673	RIKEN cDNA 9330159M07 gene	non_coding			GO:0003674,GO:0005575,GO:0008150	molecular_function|cellular_component|biological_process
9330162012Rik	18.6782	16.3322	21.0241	1.28197	0.358367	0.573565	0.793569	Up	0.519518	0.373143	0.300539	0.303173	0.129114	0.40817	493800	cDNA RIKEN 9330162012 gene	non_coding			GO:0003674,GO:0005575,GO:0008150	molecular_function|cellular_component|biological_process
9330188P03Rik	3.18052	1.62366	4.73738	2.87066	1.52138	0.417742	0.686631	Up	0.0243053	0.184095	0.152908	0	0	0.120388	380930	RIKEN cDNA 9330188P03 gene	non_coding			GO:0003674,GO:0005575,GO:0008150	molecular_function|cellular_component|biological_process
9330198N18Rik	8.94642	9.71211	8.18073	0.841878	-0.248317	0.775259	0.89999	Down	0.068409	0.101779	0.0819754	0.1562	0.0503102	0.0580867	77516	RIKEN cDNA 9330198N18 gene	non_coding			GO:0003674,GO:0005575,GO:0008150	molecular_function|cellular_component|biological_process
9430015G10Rik	678.454	651.813	705.095	1.08108	0.112478	0.57845	0.796801	Up	7.76098	6.42127	7.91988	5.30761	4.88607	8.2465	230996	RIKEN cDNA 9430015G10 gene	protein_coding			GO:0003674,GO:0005575,GO:0008150	molecular_function|cellular_component|biological_process
9430037G07Rik	6.62496	6.61074	6.63919	1.00333	0.00479326	0.99594	0.998801	Up	0.0579441	0.0470232	0.0694352	0.0856091	0.0340912	0.0328006	320692	RIKEN cDNA 9430037G07 gene	non_coding			GO:0003674,GO:0005575,GO:0008150	molecular_function|cellular_component|biological_process
9430038I01Rik	317.726	376.383	259.069	0.688189	-0.539124	0.014484	0.0830706	Down	2.34725	2.7278	2.46114	2.47514	3.21284	4.20368	77252	RIKEN cDNA 9430038I01 gene	protein_coding			GO:0003674,GO:0005575,GO:0008150	molecular_function|cellular_component|biological_process
9430060I03Rik	4.65689	5.20631	4.10747	0.787748	-0.344194	0.738705	0.881185	Down	0.0467111	0.0737087	0.0816296	0.0878347	0.0641254	0.0771223	100037260	RIKEN cDNA 9430060I03 gene	non_coding			GO:0003674,GO:0005575,GO:0008150	molecular_function|cellular_component|biological_process
9430062P05Rik	1.90876	0	3.81753	19.8324	4.30979	0.0524311	0.203174	Up	0.0259865	0.0246035	0.054495	0	0	0	115487189	RIKEN cDNA 9430062P05 gene	non_coding			GO:0003674,GO:0005575,GO:0008150	molecular_function|cellular_component|biological_process
9430078K24Rik	1.98558	0.722745	3.24842	4.53843	2.18219	0.340604	0.622318	Up	0	0.0171243	0.170681	0.0170051	0.0186224	0	77290	RIKEN cDNA 9430078K24 gene	non_coding			GO:0003674,GO:0005575,GO:0008150	molecular_function|cellular_component|biological_process
9430083A17Rik	74.2055	80.4992	67.9119	0.842245	-0.247688	0.440752	0.7066	Down	0.668453	0.507969	0.719334	0.545779	0.597685	0.880014	77428	RIKEN cDNA 9430083A17 gene	non_coding			GO:0003674,GO:0005575,GO:0008150	molecular_function|cellular_component|biological_process
9430085M18Rik	23.3421	21.0551	25.6291	1.22041	0.287362	0.643395	0.835139	Up	0.418516	0.239589	0.132668	0.22877	0.200422	0.144626	77361	RIKEN cDNA 9430085M18 gene	non_coding			GO:0003674,GO:0005575,GO:0008150	molecular_function|cellular_component|biological_process
9430091E24Rik	80.7067	78.8823	82.531	1.04522	0.0638036	0.843539	0.933548	Up	0.748287	0.941512	0.87751	0.888673	0.547419	0.760782	434350	RIKEN cDNA 9430091E24 gene	non_coding			GO:0003674,GO:0005575,GO:0008150	molecular_function|cellular_component|biological_process
9530018F02Rik	34.1639	38.9576	29.3702	0.752138	-0.41093	0.347034	0.627874	Down	0.241146	0.152209	0.231777	0.239319	0.193111	0.31188	77402	RIKEN cDNA 9530018F02 gene	non_coding			GO:0003674,GO:0005575,GO:0008150	molecular_function|cellular_component|biological_process
9530026P05Rik	11.936	13.7526	10.1193	0.737326	-0.439625	0.533386	0.769123	Down	0.343597	0.175167	0.332556	0.298197	0.435408	0.288011	330385	RIKEN cDNA 9530026P05 gene	non_coding			GO:0003674,GO:0005575,GO:0008150	molecular_function|cellular_component|biological_process
9530027J09Rik	12.5967	17.9459	7.24758	0.402372	-1.3134	0.106231	0.321584	Down	0.171783	0.0739275	0.114621	0.293652	0.0964737	0.417697	100500713	RIKEN cDNA 9530027J09 gene	non_coding
9530036M11Rik	5.13858	4.21215	6.065	1.43943	0.525499	0.720365	0.873736	Up	0.00412103	0.0117051	0.0237655	0.0193728	0.00424304	0	78616	RIKEN cDNA 9530036M11 gene	non_coding			GO:0003674,GO:0005575,GO:0008150	molecular_function|cellular_component|biological_process
9530036O11Rik	2.05659	1.32003	2.79314	2.09505	1.06698	0.624953	0.823899	Up	0	0.068076	0.00942395	0.00845026	0	0.0267108	654796	RIKEN cDNA 9530036O11Rik	non_coding			GO:0003674,GO:0005575,GO:0008150	molecular_function|cellular_component|biological_process
9530051G07Rik	14.9105	9.99464	19.8263	1.97864	0.984509	0.163988	0.41614	Up	0.0834112	0.163585	0.124941	0.084024	0.0306717	0.053119	319781	RIKEN cDNA 9530051G07 gene	non_coding			GO:0003674,GO:0005575,GO:0008150	molecular_function|cellular_component|biological_process
9530052C20Rik	21.9563	17.725	26.1876	1.47653	0.56221	0.297785	0.578227	Up	0.280222	0.176872	0.249301	0.183625	0.113658	0.12618	320229	RIKEN cDNA 9530052C20 gene	non_coding			GO:0003674,GO:0005575,GO:0008150	molecular_function|cellular_component|biological_process
9530052E02Rik	4.61069	2.68226	6.53911	2.4168	1.2731	0.350445	0.630573	Up	0.303231	0.208795	0.0578081	0.103671	0	0.109232	619321	RIKEN cDNA 9530052E02 gene	non_coding			GO:0003674,GO:0005575,GO:0008150	molecular_function|cellular_component|biological_process
9530057J20Rik	3.50842	4.21101	2.80582	0.669699	-0.578416	0.642334	0.834607	Down	0.050769	0.0288403	0.0106465	0.0477326	0.0418177	0.0301759	78672	RIKEN cDNA 9530057J20 gene	protein_coding			GO:0003674,GO:0005575,GO:0008150	molecular_function|cellular_component|biological_process
9530062K07Rik	29.7085	35.6242	23.7927	0.665809	-0.586821	0.300382	0.580283	Down	0.837527	0.539209	1.15918	0.661445	0.931309	1.85848	78739	RIKEN cDNA 9530062K07 gene	non_coding			GO:0003674,GO:0005575,GO:0008150	molecular_function|cellular_component|biological_process
9530068E07Rik	4092.56	4168.48	4016.64	0.963649	-0.0534205	0.65676	0.843338	Down	42.6189	47.7084	45.0446	38.7269	43.277	43.7718	213673	RIKEN cDNA 9530068E07 gene	protein_coding			GO:0003674,GO:0005575,GO:0008150,GO:0016020	molecular_function|cellular_component|biological_process|membrane
9530080O11Rik	4.97219	4.62014	5.32425	1.15681	0.210157	0.882174	0.951309	Up	0.167312	0.0432021	0.0478446	0.128704	0.0626419	0	319247	RIKEN cDNA 9530080O11 gene	non_coding			GO:0003674,GO:0005575,GO:0008150	molecular_function|cellular_component|biological_process
9530082P21Rik	215.45	217.197	213.703	0.983004	-0.0247309	0.937695	0.974686	Down	2.36203	1.40951	1.87492	1.25895	1.35299	2.58706	638247	RIKEN cDNA 9530082P21 gene	non_coding			GO:0003674,GO:0005575,GO:0008150	molecular_function|cellular_component|biological_process
9830107B12Rik	31.8821	35.5532	28.2109	0.794472	-0.331932	0.508404	0.755607	Down	0.276695	0.15136	0.122496	0.237022	0.189925	0.188826	328829	RIKEN cDNA 9830107B12 gene	protein_coding			GO:0009986,GO:0038023	cell surface|signaling receptor activity
9830132P13Rik	1.95443	2.34641	1.56245	0.661794	-0.595546	0.719973	0.873623	Down	0.00627946	0.0178358	0.00658416	0.00590388	0.00646537	0.031103	329753	RIKEN cDNA 9830132P13 gene	non_coding
9930012K11Rik	1151.36	1164.41	1138.32	0.977514	-0.0328107	0.853248	0.937657	Down	19.6377	13.9539	14.2038	13.3587	13.2385	17.263	268759	RIKEN cDNA 9930012K11 gene	protein_coding			GO:0003674,GO:0008150	molecular_function|biological_process
9930014A18Rik	21.6687	15.4296	27.9078	1.80954	0.855623	0.356405	0.634709	Up	0.0102528	0.213557	0.225756	0.0819362	0.0791724	0.0609401	320469	RIKEN cDNA 9930014A18 gene	non_coding			GO:0003674,GO:0005575,GO:0008150	molecular_function|cellular_component|biological_process
9930021J03Rik	1611.05	1800.78	1421.32	0.789216	-0.341507	0.0428948	0.178331	Down	2.66808	1.8883	2.07425	2.58732	2.14738	2.77858	240613	RIKEN cDNA 9930021J03 gene	protein_coding			GO:0003674,GO:0005575,GO:0008150	molecular_function|cellular_component|biological_process
9930038B18Rik	13.243	5.24851	21.2374	4.05747	2.02058	0.0152567	0.0862487	Up	1.49423	0.929662	0.447637	0.32111	0.175824	0.126876	319503	RIKEN cDNA 9930038B18 gene	non_coding			GO:0003674,GO:0005575,GO:0008150	molecular_function|cellular_component|biological_process
9930104L06Rik	254.002	210.098	297.905	1.4161	0.501921	0.0297672	0.138234	Up	2.91923	2.31654	2.73356	1.43577	1.36384	2.27338	194268	RIKEN cDNA 9930104L06 gene	protein_coding			GO:0003674,GO:0005634,GO:0005654,GO:0005730,GO:0005737,GO:0005829,GO:0008150,GO:0042254,GO:0042273	molecular_function|nucleus|nucleoplasm|nucleolus|cytoplasm|cytosol|biological_process|ribosome biogenesis|ribosomal large subunit biogenesis
9930111J21Rik1	53.5404	64.0714	43.0095	0.670479	-0.576736	0.163456	0.415472	Down	0.33358	0.225591	0.371181	0.262424	0.420558	0.566492	667214	RIKEN cDNA 9930111J21 gene 1	protein_coding			GO:0003924,GO:0005789,GO:0006952,GO:0035458	GTPase activity|endoplasmic reticulum membrane|defense response|cellular response to interferon-beta
9930111J21Rik2	15.4439	15.4518	15.4359	0.99339	-0.00956813	0.990007	0.997009	Down	0.229823	0.1347	0.172125	0.123473	0.0563399	0.314401	245240	RIKEN cDNA 9930111J21 gene 2	protein_coding			GO:0003674,GO:0005575,GO:0008150	molecular_function|cellular_component|biological_process
A030001D20Rik	50.2822	50.4783	50.0862	0.993449	-0.00948267	0.983199	0.994213	Down	0.784309	0.621333	1.14124	0.87284	0.88993	0.491545	100126243	RIKEN cDNA A030001D20 gene	non_coding			GO:0003674,GO:0005575,GO:0008150	molecular_function|cellular_component|biological_process
A130010J15Rik	282.302	306.194	258.41	0.843652	-0.245281	0.222807	0.494251	Down	1.89981	1.69845	1.49563	1.59878	1.60332	2.23373	319266	RIKEN cDNA A130010J15 gene	protein_coding			GO:0003674,GO:0005575,GO:0008150	molecular_function|cellular_component|biological_process
A130051J06Rik	13.6795	17.2548	10.1041	0.584394	-0.774986	0.283956	0.564464	Down	0.0265832	0.0467414	0.0477825	0.0928321	0.0351903	0.0564301	791370	RIKEN cDNA A130051J0 gene	non_coding			GO:0003674,GO:0005575,GO:0008150	molecular_function|cellular_component|biological_process
A1cf	96.9401	12.0879	181.792	15.0585	3.91251	0.00396977	0.0313763	Up	0.0193598	0.865152	1.33569	0.0546057	0.0558123	0.0191784	69865	APOBEC1 complementation factor	protein_coding			GO:0000792,GO:0003676,GO:0003723,GO:0003727,GO:0003729,GO:0005515,GO:0005634,GO:0005654,GO:0005737,GO:0005783,GO:0006397,GO:0007566,GO:0010609,GO:0016554,GO:0016556,GO:0030895,GO:0045293,GO:0050714,GO:0050821,GO:0140767,GO:1901537,GO:2000623	heterochromatin|nucleic acid binding|RNA binding|single-stranded RNA binding|mRNA binding|protein binding|nucleus|nucleoplasm|cytoplasm|endoplasmic reticulum|mRNA processing|embryo implantation|mRNA localization resulting in post-transcriptional regulation of gene expression|cytidine to uridine editing|mRNA modification|apolipoprotein B mRNA editing enzyme complex|mRNA editing complex|positive re…			R-MMU-72200,R-MMU-75072,R-MMU-75094,R-MMU-8953854	mRNA Editing: C to U Conversion|mRNA Editing|Formation of the Editosome|Metabolism of RNA
A230001M10Rik	34.848	58.4912	11.2049	0.192347	-2.37822	0.000198743	0.00284356	Down	0.282171	0.17365	0.0443795	0.848943	0.900628	0.559054	319951	RIKEN cDNA A230001M10 gene	non_coding			GO:0003674,GO:0005575,GO:0008150	molecular_function|cellular_component|biological_process
A230028O05Rik	1.81764	1.41441	2.22088	1.57482	0.655183	0.720871	0.873787	Up	0.0282474	0.00891471	0.0296181	0.026558	0.00969458	0	319487	RIKEN cDNA A230028O05 gene	non_coding			GO:0003674,GO:0005575,GO:0008150	molecular_function|cellular_component|biological_process
A230045G11Rik	171.207	178.397	164.018	0.919313	-0.121372	0.664394	0.846851	Down	0.572247	0.476659	0.577064	0.343981	0.576311	0.672207	624086	RIKEN cDNA A230045G11 gene	non_coding			GO:0003674,GO:0005575,GO:0008150	molecular_function|cellular_component|biological_process
A230056P14Rik	13.8779	15.1364	12.6193	0.830034	-0.268758	0.809843	0.916875	Down	0.355636	0.141772	0.255137	0.0351964	0.0578156	0.760233	320845	RIKEN cDNA A230056P14 gene	non_coding			GO:0003674,GO:0005575,GO:0008150	molecular_function|cellular_component|biological_process
A230057D06Rik	2.84951	0.324733	5.37429	14.3425	3.84223	0.0421178	0.176308	Up	0.118106	0.0248491	0.0825583	0	0	0.0129999	319893	RIKEN cDNA A230057D06 gene	non_coding			GO:0003674,GO:0005575,GO:0008150	molecular_function|cellular_component|biological_process
A230072C01Rik	71.6457	65.9744	77.317	1.16866	0.224856	0.556921	0.783884	Up	1.12315	0.757937	1.05236	0.674024	0.479782	1.11262	320742	RIKEN cDNA A230072C01 gene	non_coding			GO:0003674,GO:0005575,GO:0008150	molecular_function|cellular_component|biological_process
A230087F16Rik	1.62694	0.753825	2.50005	3.40971	1.76965	0.436633	0.70319	Up	0.0215149	0.00339498	0.00375981	0	0.00738395	0	100503323	RIKEN cDNA A230087F16 gene	non_coding			GO:0003674,GO:0005575,GO:0008150	molecular_function|cellular_component|biological_process
A230103J11Rik	4.29335	3.47828	5.10841	1.46446	0.550366	0.6452	0.836521	Up	0.0493403	0.0350358	0.116403	0.0695839	0.0254005	0.0244389	320466	RIKEN cDNA A230103J11 gene	non_coding			GO:0003674,GO:0005575,GO:0008150	molecular_function|cellular_component|biological_process
A230107N01Rik	7.1632	3.92734	10.3991	2.67396	1.41898	0.13066	0.364208	Up	0.100803	0.137855	0.129182	0.0210609	0.0691915	0.0332861	320919	RIKEN cDNA A230107N01 gene	non_coding			GO:0003674,GO:0005575,GO:0008150	molecular_function|cellular_component|biological_process
A2m	22443.5	10533.6	34353.3	3.26143	1.70551	2.11501e-27	1.70309e-24	Up	144.996	133.016	165.601	38.0996	45.7086	37.1403	232345	alpha-2-macroglobulin	protein_coding	mmu04610	Complement and coagulation cascades	GO:0001869,GO:0002020,GO:0004866,GO:0004867,GO:0005102,GO:0005515,GO:0005576,GO:0005615,GO:0007565,GO:0010466,GO:0010951,GO:0019838,GO:0019899,GO:0019959,GO:0019966,GO:0030414,GO:0042802,GO:0043120,GO:0048306,GO:0048403,GO:0048406,GO:0048863	negative regulation of complement activation, lectin pathway|protease binding|endopeptidase inhibitor activity|serine-type endopeptidase inhibitor activity|signaling receptor binding|protein binding|extracellular region|extracellular space|female pregnancy|negative regulation of peptidase activity|negative regulation of endopeptidase activity|growth factor binding|enzyme binding|interleukin-8 bin…			R-MMU-109582,R-MMU-114608,R-MMU-140837,R-MMU-140877,R-MMU-1474228,R-MMU-1474244,R-MMU-174824,R-MMU-382551,R-MMU-76002,R-MMU-76005,R-MMU-8963896,R-MMU-8963898	Hemostasis|Platelet degranulation |Intrinsic Pathway of Fibrin Clot Formation|Formation of Fibrin Clot (Clotting Cascade)|Degradation of the extracellular matrix|Extracellular matrix organization|Plasma lipoprotein assembly, remodeling, and clearance|Transport of small molecules|Platelet activation, signaling and aggregation|Response to elevated platelet cytosolic Ca2+|HDL assembly|Plasma lipopro…
A2ml1	10.0743	11.0005	9.14809	0.832642	-0.264232	0.842541	0.933529	Down	0.0111956	0.0847979	0.0645635	0.115785	0.0518716	0	232400	alpha-2-macroglobulin like 1	protein_coding			GO:0004866,GO:0004867,GO:0005575,GO:0005576,GO:0005615,GO:0010466,GO:0030414	endopeptidase inhibitor activity|serine-type endopeptidase inhibitor activity|cellular_component|extracellular region|extracellular space|negative regulation of peptidase activity|peptidase inhibitor activity
A330001L22Rik	4.68644	2.7755	6.59738	2.37654	1.24886	0.268031	0.549068	Up	0.0167676	0.0317506	0.0210975	0.00315295	0.0103584	0.0132884	102632594	RIKEN cDNA A330001L22 gene	non_coding			GO:0003674,GO:0005575,GO:0008150	molecular_function|cellular_component|biological_process
A330009N23Rik	40.8455	43.338	38.3529	0.885918	-0.174755	0.696629	0.862659	Down	0.56269	0.68696	0.543416	0.821398	0.533611	0.440066	380977	RIKEN cDNA A330009N23 gene	non_coding			GO:0003674,GO:0005575,GO:0008150	molecular_function|cellular_component|biological_process
A330015K06Rik	19.2089	28.983	9.43487	0.326512	-1.61479	0.00839611	0.0557319	Down	0.095761	0.14733	0.112959	0.337626	0.406709	0.225301	102637797	RIKEN cDNA A330015K06 gene	non_coding			GO:0003674,GO:0005575,GO:0008150	molecular_function|cellular_component|biological_process
A330023F24Rik	134.218	112.399	156.038	1.38641	0.47135	0.270465	0.55142	Up	1.18963	0.508041	0.817414	0.642529	0.27103	0.712102	320977	RIKEN cDNA A330023F24 gene	non_coding
A330035P11Rik	63.0208	66.4119	59.6296	0.898512	-0.15439	0.637969	0.831898	Down	0.717845	0.63372	0.478052	0.611068	0.569305	0.64385	319727	RIKEN cDNA A330035P11 gene	non_coding			GO:0003674,GO:0005575,GO:0008150	molecular_function|cellular_component|biological_process
A330040F15Rik	1.42472	0.649466	2.19997	3.29778	1.72149	0.430853	0.698069	Up	0.0475558	0.0675374	0.0498634	0	0	0.0471101	74333	RIKEN cDNA A330040F15 gene	non_coding			GO:0003674,GO:0005575,GO:0008150	molecular_function|cellular_component|biological_process
A330041J22Rik	4.14467	4.21101	4.07833	0.971968	-0.0410186	0.97022	0.988924	Down	0.0856159	0.0540397	0.0448852	0.0670794	0.0587671	0.0424068	319556	RIKEN cDNA A330041J22 gene	non_coding			GO:0003674,GO:0005575,GO:0008150	molecular_function|cellular_component|biological_process
A330049N07Rik	3.29788	2.44079	4.15497	1.69961	0.765207	0.61956	0.8205	Up	0	0.0625912	0.110908	0.0372933	0.0272267	0.026196	327768	RIKEN cDNA A330049N07 gene	non_coding			GO:0003674,GO:0005575,GO:0008150	molecular_function|cellular_component|biological_process
A330069E16Rik	13.2352	15.031	11.4393	0.757465	-0.400748	0.596608	0.80764	Down	0.324307	0.223308	0.525522	0.221753	0.333909	0.730154	606735	RIKEN cDNA A330069E16 gene	non_coding			GO:0003674,GO:0005575,GO:0009611	molecular_function|cellular_component|response to wounding
A330074K22Rik	2.14746	2.09496	2.19997	1.0522	0.0734071	0.959333	0.984463	Up	0.0211317	0.0300106	0.0221571	0.0198678	0.0217573	0.0209336	434353	RIKEN cDNA A330074K22 gene	non_coding			GO:0003674,GO:0005575,GO:0008150	molecular_function|cellular_component|biological_process
A330076C08Rik	65.851	87.2011	44.5008	0.511213	-0.968003	0.101071	0.311974	Down	0.909649	0.578444	0.42707	1.3786	1.52369	0.36314	100503592	RIKEN cDNA A330076C08 gene	non_coding			GO:0003674,GO:0005575,GO:0008150	molecular_function|cellular_component|biological_process
A330076H08Rik	1.61834	0.691664	2.54502	3.66291	1.87299	0.378591	0.653489	Up	0.0277702	0.0262923	0.0582354	0.0261093	0	0	320026	RIKEN cDNA A330076H08 gene	non_coding			GO:0003674,GO:0005575,GO:0008150	molecular_function|cellular_component|biological_process
A3galt2	2.738	3.26843	2.20758	0.670696	-0.57627	0.776711	0.900794	Down	0.0387881	0	0.0162681	0.00729365	0	0.0691643	215493	alpha 1%2C3-galactosyltransferase 2 (isoglobotriaosylceramide synthase)	protein_coding	mmu00603	Glycosphingolipid biosynthesis - globo and isoglobo series	GO:0001962,GO:0005794,GO:0005975,GO:0006629,GO:0006688,GO:0016020,GO:0016740,GO:0016757,GO:0016758,GO:0030259,GO:0031982,GO:0046872,GO:0047276,GO:0071287	alpha-1,3-galactosyltransferase activity|Golgi apparatus|carbohydrate metabolic process|lipid metabolic process|glycosphingolipid biosynthetic process|membrane|transferase activity|glycosyltransferase activity|hexosyltransferase activity|lipid glycosylation|vesicle|metal ion binding|N-acetyllactosaminide 3-alpha-galactosyltransferase activity|cellular response to manganese ion
A430005L14Rik	498.902	544.76	453.045	0.83186	-0.265587	0.101335	0.312353	Down	10.1792	11.9278	12.2051	11.4395	12.8233	12.6463	97159	RIKEN cDNA A430005L14 gene	protein_coding			GO:0003674,GO:0005634,GO:0005654,GO:0008150	molecular_function|nucleus|nucleoplasm|biological_process
A430018G15Rik	21.9569	18.7408	25.1729	1.33673	0.418709	0.532885	0.769006	Up	0.172335	0.0848451	0.296344	0.110179	0.070975	0.191207	115489452	RIKEN cDNA A430018G15 gene	non_coding			GO:0003674,GO:0005575,GO:0008150	molecular_function|cellular_component|biological_process
A430033K04Rik	113.408	95.0246	131.792	1.39023	0.475327	0.0932907	0.296407	Up	1.27573	1.14468	1.05787	0.713385	0.892835	0.619497	243308	RIKEN cDNA A430033K04 gene	protein_coding	mmu05168	Herpes simplex virus 1 infection	GO:0000122,GO:0000977,GO:0001227,GO:0005634,GO:0006355,GO:0045667,GO:0045892,GO:0046872	negative regulation of transcription by RNA polymerase II|RNA polymerase II transcription regulatory region sequence-specific DNA binding|DNA-binding transcription repressor activity, RNA polymerase II-specific|nucleus|regulation of DNA-templated transcription|regulation of osteoblast differentiation|negative regulation of DNA-templated transcription|metal ion binding			R-MMU-212436,R-MMU-73857,R-MMU-74160	Generic Transcription Pathway|RNA Polymerase II Transcription|Gene expression (Transcription)	zf-C2H2
A430035B10Rik	9.02866	7.95073	10.1066	1.26801	0.342561	0.653997	0.841522	Up	0.108671	0.154331	0.170916	0.102171	0.0839162	0.121109	320312	RIKEN cDNA A430035B10 gene	non_coding			GO:0003674,GO:0005575,GO:0008150	molecular_function|cellular_component|biological_process
A430046D13Rik	54.115	46.5736	61.6564	1.32101	0.401642	0.308478	0.587788	Up	0.933598	0.516572	0.928048	0.547175	0.411959	0.648595	654440	Riken cDNA A430046D13 gene	non_coding			GO:0003674,GO:0005575,GO:0008150	molecular_function|cellular_component|biological_process
A430057M04Rik	5.486	5.65536	5.31664	0.945264	-0.0812112	0.939169	0.975714	Down	0.0447727	0.0317924	0.0176045	0.0105237	0.0460982	0.0332648	319486	RIKEN cDNA A430057M04 gene	protein_coding			GO:0003674,GO:0005575,GO:0008150	molecular_function|cellular_component|biological_process
A430078I02Rik	13.4043	18.0486	8.75999	0.486181	-1.04043	0.129931	0.36298	Down	0.133349	0.0811623	0.0499356	0.161195	0.147104	0.179278	320486	RIKEN cDNA A430078I02 gene	non_coding			GO:0003674,GO:0005575,GO:0008150	molecular_function|cellular_component|biological_process
A430093F15Rik	1.56661	2.51407	0.619152	0.248892	-2.00641	0.373708	0.649036	Down	0.0124342	0.0117725	0	0.0467621	0.038407	0	403202	RIKEN cDNA A430093F15 gene	non_coding			GO:0003674,GO:0005575,GO:0008150	molecular_function|cellular_component|biological_process
A430105J06Rik	12.107	9.78479	14.4293	1.46636	0.552239	0.511144	0.757436	Up	0.10965	0.0456782	0.0459881	0.0412366	0.0135475	0.0695181	77189	RIKEN cDNA A430105J06 gene	non_coding			GO:0003674,GO:0005575,GO:0008150	molecular_function|cellular_component|biological_process
A430108G06Rik	3.58063	5.59374	1.56752	0.27886	-1.84239	0.248607	0.525781	Down	0.0512972	0.0161891	0.0179288	0.0160764	0.0176053	0.254082	319650	RIKEN cDNA A430108G06 gene	non_coding			GO:0003674,GO:0005575,GO:0008150	molecular_function|cellular_component|biological_process
A4galt	1799.48	1757.11	1841.85	1.04847	0.0682905	0.722041	0.874036	Up	23.2485	18.1445	20.2272	14.6845	21.2856	16.319	239559	alpha 1%2C4-galactosyltransferase	protein_coding	mmu00601,mmu00603	Glycosphingolipid biosynthesis - lacto and neolacto series|Glycosphingolipid biosynthesis - globo and isoglobo series	GO:0001576,GO:0005794,GO:0006493,GO:0006629,GO:0007009,GO:0008375,GO:0008378,GO:0015643,GO:0016020,GO:0016740,GO:0016757,GO:0050512	globoside biosynthetic process|Golgi apparatus|protein O-linked glycosylation|lipid metabolic process|plasma membrane organization|acetylglucosaminyltransferase activity|galactosyltransferase activity|toxic substance binding|membrane|transferase activity|glycosyltransferase activity|lactosylceramide 4-alpha-galactosyltransferase activity
A530013C23Rik	6.14838	10.4209	1.87583	0.181451	-2.46235	0.0302607	0.13972	Down	0.0356507	0.0225023	0.0124602	0.0893826	0.195766	0.058861	329562	RIKEN cDNA A530013C23 gene	non_coding			GO:0003674,GO:0005575,GO:0008150	molecular_function|cellular_component|biological_process
A530016L24Rik	61.2416	46.4713	76.012	1.63535	0.709599	0.349763	0.630469	Up	0.76639	0.725603	0.577854	0.874378	0.115259	0.110895	319942	RIKEN cDNA A530016L24 gene	protein_coding			GO:0003674,GO:0005886,GO:0008150,GO:0016020	molecular_function|plasma membrane|biological_process|membrane
A530020G20Rik	32.276	16.3656	48.1864	2.93223	1.552	0.0320833	0.145368	Up	0.325475	0.28174	0.819044	0.236063	0.0382984	0.156606	319839	RIKEN cDNA A530020G20 gene	non_coding			GO:0003674,GO:0005575,GO:0008150	molecular_function|cellular_component|biological_process
A530032D15Rik	10.702	11.9197	9.48429	0.798738	-0.324205	0.752917	0.888352	Down	0.124637	0.0544633	0.110579	0.13521	0.167812	0.00949759	381287	RIKEN cDNA A530032D15Rik gene	protein_coding			GO:0000981,GO:0001650,GO:0005634,GO:0005739,GO:0006357	DNA-binding transcription factor activity, RNA polymerase II-specific|fibrillar center|nucleus|mitochondrion|regulation of transcription by RNA polymerase II
A530040E14Rik	1.97053	1.41441	2.52665	1.79391	0.843104	0.627735	0.825836	Up	0.0280366	0.0398168	0.0440956	0.0395397	0.0144333	0	621875	RIKEN cDNA A530040E14 gene	non_coding			GO:0003674,GO:0005575,GO:0008150	molecular_function|cellular_component|biological_process
A530046M15Rik	39.5491	46.6302	32.4679	0.697998	-0.518704	0.335179	0.616603	Down	0.837854	0.356159	0.573721	0.691284	1.07392	0.457348	328190	RIKEN cDNA A530046M15 gene	non_coding
A530064D06Rik	5.91129	8.98762	2.83496	0.313735	-1.67238	0.165604	0.418604	Down	0.0276825	0.0524185	0.0435386	0.0390402	0.0427531	0.287942	328830	RIKEN cDNA A530064D06 gene	protein_coding			GO:0005515,GO:0009986,GO:0038023	protein binding|cell surface|signaling receptor activity
A530072M11Rik	35.4928	41.3767	29.6089	0.714389	-0.485217	0.412911	0.683304	Down	0.738399	0.201664	0.402004	0.427222	0.39475	0.872148	100415915	RIKEN cDNA gene A530072M11	non_coding
A630001G21Rik	15.2829	13.575	16.9908	1.25233	0.324616	0.580647	0.798286	Up	0.209154	0.198023	0.184676	0.113847	0.147342	0.163574	319997	RIKEN cDNA A630001G21 gene	protein_coding			GO:0000981,GO:0005634,GO:0006357	DNA-binding transcription factor activity, RNA polymerase II-specific|nucleus|regulation of transcription by RNA polymerase II
A630023A22Rik	14.0677	4.09667	24.0388	5.82749	2.54287	0.00332307	0.0272381	Up	0.609304	0.632705	0.247305	0.129356	0.0202369	0.0778831	105518	RIKEN cDNA A630023A22 gene	protein_coding			GO:0003674,GO:0005575,GO:0008150	molecular_function|cellular_component|biological_process
A630026N12Rik	157.089	145.753	168.425	1.15388	0.206487	0.515871	0.759317	Up	0.853716	0.743247	1.02375	0.839559	0.409185	0.782529	320961	RIKEN cDNA A630026N12 gene	non_coding			GO:0003674,GO:0005575,GO:0008150	molecular_function|cellular_component|biological_process
A630034I12Rik	67.1501	59.6801	74.6201	1.24625	0.317599	0.486951	0.739054	Up	0.161769	0.14695	0.208585	0.108932	0.0607712	0.207895	329790	RIKEN cDNA A630034I12 gene	non_coding			GO:0003674,GO:0005575,GO:0008150	molecular_function|cellular_component|biological_process
A630066F11Rik	25.1909	36.8293	13.5525	0.367322	-1.44488	0.00543652	0.0400448	Down	0.314825	0.278199	0.308095	0.532791	0.626681	1.06037	320642	RIKEN cDNA A630066F11 gene	non_coding			GO:0003674,GO:0005575,GO:0008150	molecular_function|cellular_component|biological_process
A630072L19Rik	2.80075	5.60151	0	0.0311399	-5.00509	0.0694799	0.244913	Down	0	0	0	0	0.0902135	0.00619988	100038467	RIKEN cDNA A630072L19 gene	non_coding			GO:0003674,GO:0005575,GO:0008150	molecular_function|cellular_component|biological_process
A630072M18Rik	131.444	132.399	130.489	0.985164	-0.0215643	0.944917	0.9787	Down	0.884714	0.469441	0.662603	0.475314	0.590588	0.770481	320770	RIKEN cDNA A630072M18 gene	non_coding
A630077J23Rik	4.0187	2.69224	5.34515	1.96884	0.977344	0.479942	0.734274	Up	0.32976	0.0260175	0.115254	0.0516729	0.0282936	0.136112	319973	RIKEN cDNA A630077J23 gene	non_coding			GO:0003674,GO:0005575,GO:0008150	molecular_function|cellular_component|biological_process
A630089N07Rik	28.2132	29.0069	27.4196	0.945892	-0.0802524	0.881694	0.951098	Down	0.222135	0.455679	0.388191	0.440905	0.304949	0.256729	320586	RIKEN cDNA A630089N07 gene	non_coding									zf-C2H2
A730017L22Rik	79.8985	61.5703	98.2266	1.59871	0.676905	0.0361718	0.157517	Up	1.08515	1.03789	1.32357	0.666286	0.741053	0.504584	613258	RIKEN cDNA A730017L22 gene	non_coding			GO:0003674,GO:0005575,GO:0008150	molecular_function|cellular_component|biological_process
A730020E08Rik	41.6161	45.994	37.2382	0.808462	-0.306748	0.447702	0.710949	Down	0.538317	0.62959	0.697247	0.50612	0.652064	0.925383	100504262	RIKEN cDNA A730020E08 gene	non_coding			GO:0003674,GO:0005575,GO:0008150	molecular_function|cellular_component|biological_process
A730020M07Rik	3.08576	4.90154	1.26997	0.258608	-1.95116	0.198565	0.463942	Down	0	0.0180491	0.0199887	0.0179235	0.0588843	0.0566551	100503044	RIKEN cDNA A730020M07 gene	non_coding			GO:0003674,GO:0005575,GO:0008150	molecular_function|cellular_component|biological_process
A730036I17Rik	52.3399	87.3857	17.294	0.197664	-2.33888	2.17595e-06	5.98417e-05	Down	0.130228	0.159561	0.128515	0.50416	0.370701	1.06241	329513	RIKEN cDNA A730036I17 gene	non_coding			GO:0003674,GO:0005575,GO:0008150	molecular_function|cellular_component|biological_process
A730049H05Rik	20.7598	24.5655	16.954	0.688258	-0.538978	0.351963	0.63155	Down	0.219442	0.229633	0.16954	0.260611	0.15459	0.400446	74516	RIKEN cDNA A730049H05 gene	non_coding			GO:0003674,GO:0005575,GO:0008150	molecular_function|cellular_component|biological_process
A730056A06Rik	7.31293	11.8359	2.78999	0.237045	-2.07677	0.0630632	0.230229	Down	0.0530744	0.0251249	0	0.0665334	0.109291	0.12268	319783	RIKEN cDNA A730056A06 gene	non_coding			GO:0003674,GO:0005575,GO:0008150	molecular_function|cellular_component|biological_process
A730063M14Rik	11.5697	10.6618	12.4776	1.16725	0.22311	0.835032	0.929655	Up	0.399671	0.756802	2.01151	0.0751534	0.905308	1.50452	100504703	RIKEN cDNA A730063M14 gene	non_coding
A730081D07Rik	4.79974	1.9695	7.62999	3.79485	1.92404	0.161424	0.41307	Up	0.0585384	0.110846	0.184137	0.0137593	0	0.0724872	102633880	RIKEN cDNA A730081D07 gene	non_coding			GO:0003674,GO:0005575,GO:0008150	molecular_function|cellular_component|biological_process
A730085K08Rik	26.4039	25.3066	27.5011	1.09117	0.125878	0.8478	0.935324	Up	1.39391	1.84761	0.77949	1.31054	1.48301	0.460281	654800	RIKEN cDNA A730085K08 gene	non_coding			GO:0003674,GO:0005575,GO:0008150	molecular_function|cellular_component|biological_process
A730090N16Rik	7.10607	6.89046	7.32168	1.06887	0.0960882	0.929456	0.971943	Up	0.0760618	0.126024	0.239258	0.0357563	0.254519	0.0753489	319798	RIKEN cDNA A730090N16 gene	non_coding			GO:0003674,GO:0005575,GO:0008150	molecular_function|cellular_component|biological_process
A830005F24Rik	2.42684	0.753825	4.09986	5.57526	2.47904	0.29056	0.571386	Up	0	0.26004	0.17999	0	0.070697	0	442803	RIKEN cDNA A830005F24 gene	non_coding			GO:0003674,GO:0005575,GO:0008150	molecular_function|cellular_component|biological_process
A830018L16Rik	1.95011	0.722745	3.17747	4.4686	2.15982	0.250557	0.527662	Up	0.00259276	0.0098191	0.0135929	0.00243769	0.00266952	0	320492	RIKEN cDNA A830018L16 gene	protein_coding			GO:0003674,GO:0005575,GO:0008150	molecular_function|cellular_component|biological_process
A830035A12Rik	2.50855	3.45718	1.55991	0.451964	-1.14572	0.485995	0.737993	Down	0	0.220343	0.0610055	0.273512	0.11981	0.172911	442842	RIKEN cDNA A830035A12 gene	non_coding			GO:0003674,GO:0005575,GO:0008150	molecular_function|cellular_component|biological_process
A830035O19Rik	9.02469	7.84523	10.2041	1.29426	0.372132	0.712197	0.870076	Up	0.0391928	0.136059	0.246568	0.0368487	0.0807063	0.181186	100101457	RIKEN cDNA A830035O19 gene	non_coding			GO:0003674,GO:0005575,GO:0008150	molecular_function|cellular_component|biological_process
A830049F12Rik	36.8668	33.7847	39.949	1.18025	0.239088	0.574012	0.793644	Up	0.601335	0.569332	0.518422	0.515114	0.288931	0.476559	319915	RIKEN cDNA A830049F12 gene	protein_coding			GO:0003674,GO:0005575,GO:0008150	molecular_function|cellular_component|biological_process
A830052D11Rik	4.42548	5.43613	3.41483	0.632546	-0.660757	0.669489	0.84935	Down	0.0465458	0.176275	0.0244022	0.153167	0.191695	0	402767	RIKEN cDNA A830052D11 gene	non_coding			GO:0003674,GO:0005575,GO:0008150	molecular_function|cellular_component|biological_process
A830082K12Rik	2.6014	1.41441	3.7884	2.69151	1.42842	0.379207	0.65399	Up	0.0684556	0.0216042	0.0478516	0.0321806	0.0117471	0	320174	RIKEN cDNA A830082K12 gene	non_coding			GO:0003674,GO:0005575,GO:0030182	molecular_function|cellular_component|neuron differentiation
A830082N09Rik	38.8708	41.0859	36.6557	0.890221	-0.167765	0.689657	0.85963	Down	0.110695	0.123859	0.154755	0.154534	0.0932497	0.142887	414093	RIKEN cDNA A830082N09 gene	non_coding			GO:0003674,GO:0005575,GO:0008150	molecular_function|cellular_component|biological_process
A930001A20Rik	9.74734	8.54801	10.9467	1.27699	0.352743	0.667132	0.848367	Up	0.299412	0.173236	0.104647	0.125113	0.0856324	0.197737	77127	RIKEN cDNA A930001A20 gene	non_coding			GO:0003674,GO:0005575,GO:0008150	molecular_function|cellular_component|biological_process
A930001C03Rik	19.3527	16.7613	21.9441	1.30347	0.382358	0.573529	0.793569	Up	0.242483	0.480027	0.808974	0.373058	0.204269	0.480421	319314	RIKEN cDNA A930001C03 gene	non_coding			GO:0003674,GO:0005575,GO:0008150	molecular_function|cellular_component|biological_process
A930004D18Rik	121.952	91.6291	152.275	1.65905	0.73036	0.00595948	0.0427756	Up	1.13996	0.997318	1.34657	0.685123	0.490282	0.700435	77940	RIKEN cDNA A930004D18 gene	non_coding			GO:0003674,GO:0005575,GO:0008150	molecular_function|cellular_component|biological_process
A930005H10Rik	59.1424	51.8427	66.4422	1.28252	0.358977	0.355774	0.634084	Up	1.19708	1.73548	0.9806	1.05514	0.808842	0.870867	68161	RIKEN cDNA A930005H10 gene	non_coding			GO:0003674,GO:0005575,GO:0008150	molecular_function|cellular_component|biological_process
A930006K02Rik	20.3386	20.3545	20.3228	0.993359	-0.00961333	0.9886	0.996463	Down	0.777458	0.384043	1.02784	0.603835	0.31323	1.07154	100503120	RIKEN cDNA A930006K02 gene	non_coding			GO:0003674,GO:0005575,GO:0008150	molecular_function|cellular_component|biological_process
A930007A09Rik	114.044	114.731	113.357	0.988052	-0.0173405	0.940935	0.976742	Down	0.853671	0.751851	0.770198	0.647068	0.701793	0.806337	432999	RIKEN cDNA A930007A09 gene	protein_coding			GO:0003674,GO:0005575,GO:0008150	molecular_function|cellular_component|biological_process
A930007I19Rik	20.4033	18.5415	22.2651	1.1957	0.257853	0.671819	0.850751	Up	0.181603	0.204176	0.416533	0.192084	0.140235	0.269851	77779	RIKEN cDNA A930007I19 gene	non_coding			GO:0003674,GO:0005575,GO:0008150	molecular_function|cellular_component|biological_process
A930012L18Rik	3.06991	3.93732	2.20251	0.56225	-0.830718	0.594859	0.806754	Down	0.0333736	0.021065	0.0233287	0	0.0801771	0.044081	626275	RIKEN cDNA A930012L18 gene	non_coding			GO:0003674,GO:0005575,GO:0008150	molecular_function|cellular_component|biological_process
A930013F10Rik	31.6251	27.7484	35.5017	1.27712	0.352894	0.445014	0.709365	Up	0.301908	0.357301	0.553977	0.273714	0.255338	0.320442	68074	RIKEN cDNA A930013F10 gene	non_coding			GO:0003674,GO:0005575,GO:0008150	molecular_function|cellular_component|biological_process
A930015D03Rik	519.938	555.639	484.237	0.871779	-0.197965	0.282525	0.563131	Down	19.4193	17.2328	13.77	17.608	16.4698	17.6396	77810	RIKEN cDNA A930015D03 gene	non_coding			GO:0003674,GO:0005575,GO:0008150	molecular_function|cellular_component|biological_process
A930017K11Rik	102.99	107.626	98.353	0.913433	-0.13063	0.653967	0.841522	Down	1.12064	0.930552	0.809031	1.07089	0.728231	1.00095	100034748	RIKEN cDNA A930017K11 gene	protein_coding			GO:0003674,GO:0005575,GO:0008150	molecular_function|cellular_component|biological_process
A930018O16Rik	2.24347	1.69694	2.78999	1.63816	0.712075	0.68669	0.858033	Up	0.138778	0.065696	0	0.0217462	0.0238144	0.0687385	105245580	RIKEN cDNA A930018O16 gene	protein_coding			GO:0003674,GO:0005575,GO:0008150	molecular_function|cellular_component|biological_process
A930018P22Rik	3.3145	3.39389	3.23512	0.945259	-0.0812177	0.959297	0.984463	Down	0.0642207	0	0.269348	0.0603796	0.066122	0.190856	68243	RIKEN cDNA A930018P22 gene	protein_coding			GO:0003674,GO:0008150	molecular_function|biological_process
A930024E05Rik	11.8222	8.20332	15.4411	1.87244	0.904916	0.353552	0.632767	Up	0.0970931	0.0919259	0.494479	0.15649	0.0428433	0.123664	109202	RIKEN cDNA A930024E05 gene	non_coding			GO:0003674,GO:0005575,GO:0008150	molecular_function|cellular_component|biological_process
A930033H14Rik	23.3829	20.3405	26.4252	1.2959	0.373957	0.575478	0.794632	Up	0.159438	0.184498	0.399361	0.0749509	0.173278	0.272014	320700	RIKEN cDNA A930033H14 gene	protein_coding			GO:0003674,GO:0005575,GO:0008150	molecular_function|cellular_component|biological_process
A930037H05Rik	5.98492	5.93903	6.0308	1.01482	0.0212219	0.982471	0.99412	Up	0.0272052	0.0601005	0.0855759	0.0426301	0.0560213	0.0539005	78439	RIKEN cDNA A930037H05 gene	non_coding			GO:0003674,GO:0005575,GO:0008150	molecular_function|cellular_component|biological_process
A930038B10Rik	10.9212	11.5434	10.299	0.895204	-0.159711	0.832514	0.928443	Down	0.0782331	0.0854649	0.0315497	0.067896	0.0681571	0.0596153	320323	RIKEN cDNA A930038B10 gene	non_coding			GO:0003674,GO:0005575,GO:0008150	molecular_function|cellular_component|biological_process
AA386476	51.5775	34.1205	69.0345	2.01766	1.01268	0.016758	0.0925019	Up	0.218908	0.188697	0.308324	0.135162	0.0672803	0.113283	546058	expressed sequence AA386476	non_coding			GO:0003674,GO:0005575,GO:0008150	molecular_function|cellular_component|biological_process
AA414768	845.815	829.826	861.805	1.03884	0.0549782	0.726583	0.875619	Up	13.0468	14.799	15.1007	10.7257	13.4655	12.8152	245350	expressed sequence AA414768	protein_coding	mmu04120	Ubiquitin mediated proteolysis
AA465934	5.14431	3.01697	7.27164	2.37809	1.2498	0.260198	0.539616	Up	0.413063	0.521441	0.64966	0.129453	0.0708821	0.409192	613254	expressed sequence AA465934	non_coding			GO:0003674,GO:0005575,GO:0008150	molecular_function|cellular_component|biological_process
AA467197	645.129	585.275	704.983	1.20537	0.269478	0.121327	0.34867	Up	32.0922	31.9016	27.6176	20.2826	25.5962	22.022	433470	expressed sequence AA467197	protein_coding			GO:0005634,GO:0005739,GO:0005751,GO:0009617	nucleus|mitochondrion|mitochondrial respiratory chain complex IV|response to bacterium
AA543186	20.2775	11.9091	28.6459	2.41187	1.27015	0.021842	0.111317	Up	0.573726	0.396384	0.43898	0.131208	0.207547	0.184329	100272219	expressed sequence AA543186	non_coding
AA986860	1142.17	1535.29	749.043	0.487946	-1.03521	0.000597062	0.00693163	Down	4.74618	8.1655	8.46476	12.1885	17.0709	9.60042	212439	expressed sequence AA986860	protein_coding			GO:0003674,GO:0005737,GO:0005829,GO:0005886,GO:0008150	molecular_function|cytoplasm|cytosol|plasma membrane|biological_process
AAdacl4fm3	34.4594	25.8878	43.031	1.65519	0.726996	0.191898	0.455985	Up	0.831492	0.714009	1.09487	0.636317	0.179186	0.612986	546849	AADACL4 family member 3	protein_coding			GO:0005575	cellular_component
AB010352	271.089	290.77	251.408	0.864381	-0.21026	0.323205	0.604294	Down	0.830556	0.548506	0.666582	0.723037	0.622883	0.766904	105246961	cDNA sequence AB010352	protein_coding	mmu05168	Herpes simplex virus 1 infection	GO:0003674,GO:0005575,GO:0008150	molecular_function|cellular_component|biological_process
AB124611	57.9106	56.7448	59.0765	1.03924	0.0555342	0.868576	0.944896	Up	0.714701	0.789443	0.971421	0.734173	0.585963	0.812893	382062	cDNA sequence AB124611	protein_coding			GO:0003674,GO:0005575,GO:0008150,GO:0016020	molecular_function|cellular_component|biological_process|membrane
AI182371	20.6278	14.6336	26.6219	1.81884	0.86302	0.322554	0.603413	Up	0.0266537	0.353294	0.363312	0.125298	0.118919	0.123218	98870	expressed sequence AI182371	protein_coding			GO:0003674,GO:0005575,GO:0008150	molecular_function|cellular_component|biological_process
AI225912	20.8662	20.2707	21.4616	1.05505	0.0773123	0.88525	0.952789	Up	0.0847092	0.0802011	0.0968942	0.0832629	0.047573	0.091544	102015	expressed sequence AI225912	non_coding
AI314278	62.6651	26.8436	98.4865	3.67257	1.87679	0.0221474	0.11256	Up	0.0997409	1.32206	2.0219	0.166712	0.399365	0.274462	101521	expressed sequence AI314278	non_coding			GO:0003674,GO:0005575,GO:0008150	molecular_function|cellular_component|biological_process
AI429214	217.01	223.112	210.907	0.944483	-0.0824035	0.664152	0.846851	Down	3.02049	2.82161	3.12482	2.90294	2.41882	3.17836	621080	expressed sequence AI429214	protein_coding			GO:0003674,GO:0005575,GO:0008150	molecular_function|cellular_component|biological_process
AI450353	11.4839	9.74259	13.2252	1.3486	0.431465	0.621645	0.821582	Up	0.385709	0.132794	0.220596	0.131869	0.0541539	0.312623	103729	expressed sequence AI450353	non_coding			GO:0003674,GO:0005575,GO:0008150	molecular_function|cellular_component|biological_process
AI463170	1.4425	0	2.885	14.9869	3.90563	0.205052	0.472625	Up	0	0.138327	0.306383	0	0	0	100504549	expressed sequence AI463170	non_coding			GO:0003674,GO:0005575,GO:0008150	molecular_function|cellular_component|biological_process
AI463229	1.58531	0.670565	2.50005	3.6733	1.87708	0.359805	0.637945	Up	0.0790532	0.0124743	0.0138149	0.0123875	0	0.0130521	100042802	expressed sequence AI463229	non_coding			GO:0003674,GO:0005575,GO:0008150	molecular_function|cellular_component|biological_process
AI467606	295.618	394.412	196.825	0.4992	-1.00231	0.0132513	0.0780007	Down	1.2432	3.9159	2.21849	3.23679	5.4277	4.68934	101602	expressed sequence AI467606	protein_coding			GO:0003674,GO:0005575,GO:0008150,GO:0016020	molecular_function|cellular_component|biological_process|membrane
AI504432	16.354	14.9062	17.8018	1.19115	0.25235	0.686489	0.858033	Up	0.0758972	0.0583846	0.134291	0.0668979	0.0586081	0.0751859	229694	expressed sequence AI504432	non_coding			GO:0003674,GO:0005575,GO:0008150	molecular_function|cellular_component|biological_process
AI506816	301.327	284.441	318.213	1.11914	0.16239	0.637018	0.831739	Up	4.59748	3.24222	1.68621	2.70379	2.43498	2.45525	433855	expressed sequence AI506816	non_coding			GO:0009611	response to wounding
AI593442	1.58747	0	3.17493	16.5018	4.04455	0.174213	0.430633	Up	0	0.0145624	0.0161273	0	0	0	330941	expressed sequence AI593442	protein_coding			GO:0003674,GO:0005575,GO:0008150,GO:0016020	molecular_function|cellular_component|biological_process|membrane
AI597479	1360.75	1450.2	1271.3	0.876489	-0.190192	0.239747	0.514888	Down	11.7913	9.5144	9.33241	10.4352	8.67841	12.2535	98404	expressed sequence AI597479	protein_coding			GO:0003674,GO:0005634,GO:0005654,GO:0008150,GO:0048598,GO:0072669	molecular_function|nucleus|nucleoplasm|biological_process|embryonic morphogenesis|tRNA-splicing ligase complex
AI606473	1.80319	1.37221	2.23418	1.61519	0.691703	0.67504	0.852452	Up	0.0121527	0.0230118	0.0509694	0.0114258	0.0125125	0.0240775	99686	expressed sequence AI606473	non_coding			GO:0003674,GO:0005575,GO:0008150	molecular_function|cellular_component|biological_process
AI661453	4362.48	4549.66	4175.31	0.917715	-0.123882	0.422973	0.69159	Down	26.7844	22.6573	19.6342	22.8976	19.7804	24.7524	224833	expressed sequence AI661453	protein_coding			GO:0003674,GO:0005575,GO:0008150	molecular_function|cellular_component|biological_process
AI662270	147.339	170.382	124.297	0.728276	-0.457443	0.16429	0.416644	Down	2.09192	2.22816	3.03554	2.65167	2.01923	4.47767	100043636	expressed sequence AI662270	non_coding			GO:0003674,GO:0005575,GO:0008150	molecular_function|cellular_component|biological_process
AI837181	769.001	755.946	782.056	1.03483	0.0493976	0.687959	0.859051	Up	13.9997	14.076	14.0191	11.3871	12.2775	12.7395	107242	expressed sequence AI837181	protein_coding			GO:0003674,GO:0005575,GO:0008150	molecular_function|cellular_component|biological_process
AI839979	18.1664	12.6319	23.7009	1.88068	0.911251	0.108352	0.325801	Up	0.560494	0.466985	0.658214	0.210788	0.323169	0.266516	100740	expressed sequence AI839979	non_coding			GO:0003674,GO:0005575,GO:0008150	molecular_function|cellular_component|biological_process
AI854703	43.0044	21.5907	64.4181	2.96959	1.57027	0.00113351	0.0117019	Up	0.428667	0.315664	0.649231	0.153535	0.0840682	0.181993	243373	expressed sequence AI854703	protein_coding			GO:0000978,GO:0003700,GO:0006357	RNA polymerase II cis-regulatory region sequence-specific DNA binding|DNA-binding transcription factor activity|regulation of transcription by RNA polymerase II
AI987944	365.85	359.694	372.006	1.03372	0.0478391	0.821603	0.922922	Up	3.19743	2.14566	2.74237	2.50409	1.90335	2.57738	233168	expressed sequence AI987944	protein_coding	mmu05168	Herpes simplex virus 1 infection	GO:0000122,GO:0000977,GO:0001227	negative regulation of transcription by RNA polymerase II|RNA polymerase II transcription regulatory region sequence-specific DNA binding|DNA-binding transcription repressor activity, RNA polymerase II-specific					zf-C2H2
ATP6	1492.42	1220.8	1764.04	1.445	0.531066	0.00344697	0.0280594	Up	73.5273	57.7315	84.9504	48.5795	42.4245	41.9279	17705		protein_coding	mmu00190,mmu04714,mmu05208,mmu05010,mmu05012,mmu05014,mmu05016,mmu05020,mmu05022,mmu05415	Oxidative phosphorylation|Thermogenesis|Chemical carcinogenesis - reactive oxygen species|Alzheimer disease|Parkinson disease|Amyotrophic lateral sclerosis|Huntington disease|Prion disease|Pathways of neurodegeneration - multiple diseases|Diabetic cardiomyopathy	GO:0005739,GO:0005753,GO:0015986,GO:0042776,GO:0046933	mitochondrion|mitochondrial proton-transporting ATP synthase complex|proton motive force-driven ATP synthesis|proton motive force-driven mitochondrial ATP synthesis|proton-transporting ATP synthase activity, rotational mechanism	WP295,WP1248	Electron transport chain|Oxidative phosphorylation	R-MMU-1428517,R-MMU-1430728,R-MMU-1592230,R-MMU-163200,R-MMU-163210,R-MMU-1852241,R-MMU-8949613	The citric acid (TCA) cycle and respiratory electron transport|Metabolism|Mitochondrial biogenesis|Respiratory electron transport, ATP synthesis by chemiosmotic coupling, and heat production by uncoupling proteins.|Formation of ATP by chemiosmotic coupling|Organelle biogenesis and maintenance|Cristae formation
ATP8	55.9469	37.7653	74.1285	1.95986	0.970753	0.0416653	0.174888	Up	9.15286	5.73649	15.5444	5.81776	3.45098	4.46969	17706		protein_coding	mmu00190,mmu04714,mmu05208,mmu05010,mmu05012,mmu05014,mmu05016,mmu05020,mmu05022,mmu05415	Oxidative phosphorylation|Thermogenesis|Chemical carcinogenesis - reactive oxygen species|Alzheimer disease|Parkinson disease|Amyotrophic lateral sclerosis|Huntington disease|Prion disease|Pathways of neurodegeneration - multiple diseases|Diabetic cardiomyopathy	GO:0000276,GO:0005739,GO:0005753,GO:0006754,GO:0006811,GO:0015078,GO:0015986,GO:0016020,GO:0042776,GO:0045263,GO:0046933,GO:1902600	mitochondrial proton-transporting ATP synthase complex, coupling factor F(o)|mitochondrion|mitochondrial proton-transporting ATP synthase complex|ATP biosynthetic process|monoatomic ion transport|proton transmembrane transporter activity|proton motive force-driven ATP synthesis|membrane|proton motive force-driven mitochondrial ATP synthesis|proton-transporting ATP synthase complex, coupling facto…	WP295,WP1248	Electron transport chain|Oxidative phosphorylation	R-MMU-1428517,R-MMU-1430728,R-MMU-1592230,R-MMU-163200,R-MMU-163210,R-MMU-1852241,R-MMU-8949613	The citric acid (TCA) cycle and respiratory electron transport|Metabolism|Mitochondrial biogenesis|Respiratory electron transport, ATP synthesis by chemiosmotic coupling, and heat production by uncoupling proteins.|Formation of ATP by chemiosmotic coupling|Organelle biogenesis and maintenance|Cristae formation
AU015791	82.1145	100.152	64.0772	0.640163	-0.643489	0.205742	0.473564	Down	2.81092	1.27949	1.41698	3.98962	2.11495	1.41907	104932	expressed sequence AU015791	non_coding			GO:0003674,GO:0005575,GO:0008150	molecular_function|cellular_component|biological_process
AU015836	8297.01	10917.7	5676.32	0.5199	-0.943695	1.51875e-08	7.60544e-07	Down	56.8921	50.5611	50.1028	91.1793	69.2448	112.318	385493	expressed sequence AU015836	non_coding			GO:0005758,GO:0015035,GO:0022417,GO:0045041	mitochondrial intermembrane space|protein-disulfide reductase activity|protein maturation by protein folding|protein import into mitochondrial intermembrane space
AU018091	3232.21	2382.61	4081.8	1.71299	0.776518	0.00516311	0.0384025	Up	42.6005	29.5696	26.4872	20.0944	10.2608	21.4141	245128	expressed sequence AU018091	protein_coding			GO:0000064,GO:0005886,GO:0015189,GO:0097638,GO:1903352	L-ornithine transmembrane transporter activity|plasma membrane|L-lysine transmembrane transporter activity|L-arginine import across plasma membrane|L-ornithine transmembrane transport
AU020206	204.023	225.209	182.837	0.812177	-0.300134	0.305348	0.584458	Down	3.00338	3.02127	4.86145	3.58263	4.85105	3.45871	108167440	expressed sequence AU020206	non_coding			GO:0003674,GO:0005575,GO:0008150	molecular_function|cellular_component|biological_process
AU021063	1.40329	2.80658	0	0.0620096	-4.01137	0.193066	0.457301	Down	0	0	0	0	0.185777	0.178744	105968	expressed sequence AU021063	non_coding			GO:0003674,GO:0005575,GO:0008150	molecular_function|cellular_component|biological_process
AU021092	333.717	410.299	257.136	0.626202	-0.6753	0.000943646	0.0100831	Down	5.56348	4.69212	5.21625	7.39086	5.66954	9.14168	239691	expressed sequence AU021092	protein_coding			GO:0003674,GO:0005576,GO:0005829,GO:0008150,GO:0016020,GO:0042803	molecular_function|extracellular region|cytosol|biological_process|membrane|protein homodimerization activity
AU022252	566.153	550.157	582.15	1.05805	0.0814029	0.668091	0.848753	Up	3.00883	3.0675	2.42791	2.00759	2.25562	2.98521	230696	expressed sequence AU022252	protein_coding			GO:0003674,GO:0005575,GO:0008150,GO:0042802	molecular_function|cellular_component|biological_process|identical protein binding
AU022754	21.5955	24.0509	19.1401	0.79685	-0.32762	0.554593	0.782734	Down	0.265104	0.142231	0.129719	0.216015	0.191067	0.192588	105975	expressed sequence AU022754	non_coding			GO:0003674,GO:0005575,GO:0008150	molecular_function|cellular_component|biological_process
AU022793	2.33913	1.8224	2.85586	1.58577	0.665187	0.682288	0.855558	Up	0.0422351	0.0266582	0.059046	0.0264727	0.0434855	0	105976	expressed sequence AU022793	non_coding			GO:0003674,GO:0005575,GO:0008150	molecular_function|cellular_component|biological_process
AU040320	2487.53	2689.44	2285.62	0.849859	-0.234704	0.111888	0.33202	Down	12.9767	11.7872	9.87457	11.3899	11.2549	13.9513	100317	expressed sequence AU040320	protein_coding			GO:0001675,GO:0001764,GO:0003674,GO:0005730,GO:0005794,GO:0005802,GO:0005886,GO:0007283,GO:0010996,GO:0016020,GO:0019065,GO:0030317,GO:0031410,GO:0120211	acrosome assembly|neuron migration|molecular_function|nucleolus|Golgi apparatus|trans-Golgi network|plasma membrane|spermatogenesis|response to auditory stimulus|membrane|receptor-mediated endocytosis of virus by host cell|flagellated sperm motility|cytoplasmic vesicle|proacrosomal vesicle fusion
AU041133	215.53	220.21	210.85	0.957448	-0.062734	0.76993	0.897531	Down	1.08832	1.16881	1.35687	1.24722	1.04807	1.06739	216177	expressed sequence AU041133	protein_coding	mmu05168	Herpes simplex virus 1 infection	GO:0000122,GO:0000977,GO:0001227	negative regulation of transcription by RNA polymerase II|RNA polymerase II transcription regulatory region sequence-specific DNA binding|DNA-binding transcription repressor activity, RNA polymerase II-specific					zf-C2H2
AV039307	5.68311	4.337	7.02921	1.60227	0.680118	0.566668	0.789802	Up	0.0592305	0.112157	0.26912	0.055688	0.020328	0.176026	100502700	expressed sequence AV039307	non_coding			GO:0003674,GO:0005575,GO:0008150	molecular_function|cellular_component|biological_process
AV051173	14.451	13.1787	15.7233	1.18619	0.246341	0.731122	0.878228	Up	0.838863	0.635376	0.615698	0.473215	0.215925	0.914102	100502959	expressed sequence AV051173	non_coding
AV099323	17.8691	20.0092	15.729	0.784894	-0.349431	0.552051	0.780814	Down	0.12266	0.154843	0.128612	0.199895	0.101033	0.162014	102633666	expressed sequence AV099323	non_coding			GO:0003674,GO:0005575,GO:0008150	molecular_function|cellular_component|biological_process
AW011738	98.0975	100.833	95.3615	0.945366	-0.0810555	0.829114	0.926832	Down	1.04427	1.09754	0.743355	1.25204	0.581982	0.892123	100382	expressed sequence AW011738	non_coding			GO:0003674,GO:0005575,GO:0008150	molecular_function|cellular_component|biological_process
AW046200	4.43508	5.9801	2.89007	0.481773	-1.05357	0.404684	0.676636	Down	0.0351113	0.0166214	0.110445	0.0330113	0.144603	0.121738	100502619	expressed sequence AW046200	non_coding			GO:0003674,GO:0005575,GO:0008150	molecular_function|cellular_component|biological_process
AW047730	7.31086	6.4625	8.15921	1.27256	0.347736	0.721414	0.873864	Up	0.187536	0.095607	0.0907552	0.0949414	0.133677	0.0285813	99870	expressed sequence AW047730	non_coding			GO:0003674,GO:0005575,GO:0008150	molecular_function|cellular_component|biological_process
AW112010	89.2639	95.382	83.1457	0.870905	-0.199413	0.519547	0.760961	Down	3.29154	2.73083	2.91756	2.23327	2.86492	4.1683	107350	expressed sequence AW112010	non_coding			GO:0003674,GO:0005575,GO:0008150	molecular_function|cellular_component|biological_process
AW121686	2.41576	3.56154	1.26997	0.356986	-1.48606	0.376893	0.651993	Down	0	0.0159352	0.0176477	0.0395607	0.0346585	0.00833661	106026	expressed sequence AW121686	non_coding			GO:0003674,GO:0005575,GO:0008150	molecular_function|cellular_component|biological_process
AW146154	127.604	136.719	118.49	0.865736	-0.208001	0.473428	0.730088	Down	0.863505	0.890546	1.13984	1.21779	0.746184	1.0158	101835	expressed sequence AW146154	protein_coding	mmu05168	Herpes simplex virus 1 infection							zf-C2H2
AW209491	558.304	529.393	587.215	1.10987	0.15039	0.480905	0.734788	Up	9.97076	7.28625	6.93792	6.47775	7.14735	5.74352	105351	expressed sequence AW209491	protein_coding			GO:0003674,GO:0005575,GO:0008150	molecular_function|cellular_component|biological_process
AW551984	99.9296	69.1621	130.697	1.89035	0.918653	0.0931022	0.296184	Up	0.289487	0.765535	1.0048	0.492726	0.292918	0.173053	244810	expressed sequence AW551984	protein_coding			GO:0003674,GO:0005654,GO:0055007,GO:0060923	molecular_function|nucleoplasm|cardiac muscle cell differentiation|cardiac muscle cell fate commitment
AW554918	250.653	229.944	271.362	1.17988	0.238636	0.186415	0.449428	Up	0.369198	0.389271	0.442834	0.28006	0.298055	0.333874	225289	expressed sequence AW554918	protein_coding			GO:0003674,GO:0005575,GO:0008150	molecular_function|cellular_component|biological_process
AW822252	162.407	163.799	161.014	0.98139	-0.0271017	0.923006	0.968974	Down	3.94111	3.38587	5.10166	3.27081	2.98072	5.15736	331578	expressed sequence AW822252	non_coding			GO:0003674,GO:0005575,GO:0008150	molecular_function|cellular_component|biological_process
AY036118	2.96085	2.72332	3.19838	1.16404	0.219146	0.875146	0.947727	Up	0.0373291	0.0353425	0.117421	0.0175482	0.0384343	0.0924482	101056014	cDNA sequence AY036118	non_coding			GO:0008284,GO:0030097	positive regulation of cell population proliferation|hemopoiesis
AY358078	4.31625	5.18407	3.44842	0.66534	-0.587836	0.70418	0.865542	Down	0.144002	0.0170423	0.0377474	0	0.111199	0.160484	278676	cDNA sequence AY358078	protein_coding			GO:0003674,GO:0005575,GO:0008150	molecular_function|cellular_component|biological_process
Aaas	606.721	579.621	633.822	1.09341	0.128839	0.339246	0.62085	Up	10.2384	9.63868	9.17124	7.48844	7.4402	8.89437	223921	achalasia%2C adrenocortical insufficiency%2C alacrimia	protein_coding	mmu03013	Nucleocytoplasmic transport	GO:0000922,GO:0001578,GO:0003674,GO:0005634,GO:0005635,GO:0005643,GO:0005654,GO:0005737,GO:0005813,GO:0005829,GO:0005856,GO:0006913,GO:0007612,GO:0009566,GO:0015031,GO:0031965,GO:0051028,GO:0072686,GO:0090307	spindle pole|microtubule bundle formation|molecular_function|nucleus|nuclear envelope|nuclear pore|nucleoplasm|cytoplasm|centrosome|cytosol|cytoskeleton|nucleocytoplasmic transport|learning|fertilization|protein transport|nuclear membrane|mRNA transport|mitotic spindle|mitotic spindle assembly			R-MMU-1430728,R-MMU-159227,R-MMU-159230,R-MMU-159231,R-MMU-159234,R-MMU-159236,R-MMU-162582,R-MMU-1640170,R-MMU-170822,R-MMU-191859,R-MMU-194315,R-MMU-194441,R-MMU-211000,R-MMU-2262752,R-MMU-2980766,R-MMU-2990846,R-MMU-3108214,R-MMU-3108232,R-MMU-3232142,R-MMU-3301854,R-MMU-3371453,R-MMU-3371556,R-MMU-392499,R-MMU-4085377,R-MMU-4551638,R-MMU-4570464,R-MMU-4615885,R-MMU-5578749,R-MMU-597592,R-MMU-…	Metabolism|Transport of the SLBP independent Mature mRNA|Transport of the SLBP Dependant Mature mRNA|Transport of Mature mRNA Derived from an Intronless Transcript|Transport of Mature mRNAs Derived from Intronless Transcripts|Transport of Mature mRNA derived from an Intron-Containing Transcript|Signal Transduction|Cell Cycle|Regulation of Glucokinase by Glucokinase Regulatory Protein|snRNP Assemb…
Aacs	1641.15	1625	1657.31	1.01974	0.0282058	0.834968	0.929655	Up	15.6134	12.6102	15.3027	13.1921	11.3595	13.5716	78894	acetoacetyl-CoA synthetase	protein_coding	mmu00650,mmu00280	Butanoate metabolism|Valine, leucine and isoleucine degradation	GO:0000166,GO:0001889,GO:0005524,GO:0005737,GO:0006629,GO:0006631,GO:0007584,GO:0009410,GO:0010243,GO:0014070,GO:0016874,GO:0030729,GO:0032024,GO:0034201,GO:0045471,GO:0047760,GO:0071333	nucleotide binding|liver development|ATP binding|cytoplasm|lipid metabolic process|fatty acid metabolic process|response to nutrient|response to xenobiotic stimulus|response to organonitrogen compound|response to organic cyclic compound|ligase activity|acetoacetate-CoA ligase activity|positive regulation of insulin secretion|response to oleic acid|response to ethanol|butyrate-CoA ligase activity|…			R-MMU-1430728,R-MMU-556833,R-MMU-74182,R-MMU-77111	Metabolism|Metabolism of lipids|Ketone body metabolism|Synthesis of Ketone Bodies
Aadac	16.5544	0.345832	32.763	87.4301	6.45006	2.17299e-05	0.000437009	Up	0.12194	0.827394	1.15071	0.0191078	0	0	67758	arylacetamide deacetylase	protein_coding			GO:0004806,GO:0005783,GO:0005789,GO:0006629,GO:0010898,GO:0016020,GO:0016298,GO:0016787,GO:0017171,GO:0019213,GO:0043231,GO:0052689	triglyceride lipase activity|endoplasmic reticulum|endoplasmic reticulum membrane|lipid metabolic process|positive regulation of triglyceride catabolic process|membrane|lipase activity|hydrolase activity|serine hydrolase activity|deacetylase activity|intracellular membrane-bounded organelle|carboxylic ester hydrolase activity			R-MMU-1430728,R-MMU-211859,R-MMU-211945	Metabolism|Biological oxidations|Phase I - Functionalization of compounds
Aadacl3	3.72377	1.0375	6.41005	6.15075	2.62076	0.137071	0.374916	Up	0.0166815	0.0394843	0.113691	0.0235257	0	0	230883	arylacetamide deacetylase like 3	protein_coding			GO:0005575,GO:0016020,GO:0016787,GO:0052689	cellular_component|membrane|hydrolase activity|carboxylic ester hydrolase activity
Aadacl4fm5	9.17245	3.10137	15.2435	4.88956	2.2897	0.0190864	0.100953	Up	0.293836	0.173874	0.42363	0.103598	0.0189085	0.0363853	329993	AADACL4 family member 5	protein_coding			GO:0005575	cellular_component
Aadat	12.4741	0.670565	24.2775	35.3439	5.14339	0.000642608	0.00734185	Up	0.0247049	0.537973	0.375603	0.0116137	0	0.0122367	23923	aminoadipate aminotransferase	protein_coding	mmu00310,mmu00380	Lysine degradation|Tryptophan metabolism	GO:0003824,GO:0005739,GO:0006103,GO:0006536,GO:0008483,GO:0009058,GO:0016212,GO:0016740,GO:0030170,GO:0042803,GO:0047315,GO:0047536,GO:0047958,GO:0050094,GO:0070189,GO:1901605	catalytic activity|mitochondrion|2-oxoglutarate metabolic process|glutamate metabolic process|transaminase activity|biosynthetic process|kynurenine-oxoglutarate transaminase activity|transferase activity|pyridoxal phosphate binding|protein homodimerization activity|kynurenine-glyoxylate transaminase activity|2-aminoadipate transaminase activity|glycine:2-oxoglutarate aminotransferase activity|met…	WP79	Tryptophan metabolism	R-MMU-1430728,R-MMU-71064,R-MMU-71240,R-MMU-71291	Metabolism|Lysine catabolism|Tryptophan catabolism|Metabolism of amino acids and derivatives
Aagab	1413.52	1358.41	1468.64	1.08122	0.112664	0.384511	0.65898	Up	8.26095	7.12734	7.65438	5.48989	6.49133	7.11398	66939	alpha- and gamma-adaptin binding protein	protein_coding			GO:0003674,GO:0005737,GO:0005829,GO:0008150,GO:0015031,GO:0016607	molecular_function|cytoplasm|cytosol|biological_process|protein transport|nuclear speck
Aak1	3185.4	3218.38	3152.42	0.97938	-0.0300594	0.814532	0.919325	Down	6.01846	4.901	5.91146	4.97929	4.53739	5.87865	269774	AP2 associated kinase 1	protein_coding			GO:0000166,GO:0004672,GO:0004674,GO:0005112,GO:0005524,GO:0005829,GO:0005886,GO:0005905,GO:0006468,GO:0006897,GO:0016020,GO:0016301,GO:0016310,GO:0016740,GO:0031252,GO:0032880,GO:0035612,GO:0042995,GO:0043195,GO:0043231,GO:0044305,GO:0045202,GO:0045747,GO:0050821,GO:0071439,GO:0098793,GO:0140238,GO:2000369	nucleotide binding|protein kinase activity|protein serine/threonine kinase activity|Notch binding|ATP binding|cytosol|plasma membrane|clathrin-coated pit|protein phosphorylation|endocytosis|membrane|kinase activity|phosphorylation|transferase activity|cell leading edge|regulation of protein localization|AP-2 adaptor complex binding|cell projection|terminal bouton|intracellular membrane-bounded or…			R-MMU-199991,R-MMU-5653656,R-MMU-8856825,R-MMU-8856828	Membrane Trafficking|Vesicle-mediated transport|Cargo recognition for clathrin-mediated endocytosis|Clathrin-mediated endocytosis
Aamdc	665.028	672	658.056	0.979305	-0.0301702	0.839876	0.932164	Down	20.6705	17.0557	17.0962	14.9095	16.3816	18.8876	66273	adipogenesis associated Mth938 domain containing	protein_coding			GO:0003674,GO:0005737,GO:0006366,GO:0043066,GO:0045600,GO:0045944	molecular_function|cytoplasm|transcription by RNA polymerase II|negative regulation of apoptotic process|positive regulation of fat cell differentiation|positive regulation of transcription by RNA polymerase II
Aamp	8524.76	7945.16	9104.35	1.14587	0.196438	0.0753672	0.258999	Up	105.78	104.28	97.1033	75.4598	73.2373	92.0162	227290	angio-associated migratory protein	protein_coding			GO:0005829,GO:0008201,GO:0009986,GO:0015630,GO:0045171	cytosol|heparin binding|cell surface|microtubule cytoskeleton|intercellular bridge			R-MMU-109582,R-MMU-162582,R-MMU-168249,R-MMU-168256,R-MMU-168638,R-MMU-168643,R-MMU-177929,R-MMU-392518,R-MMU-428930,R-MMU-76002,R-MMU-9006934	Hemostasis|Signal Transduction|Innate Immune System|Immune System|NOD1/2 Signaling Pathway|Nucleotide-binding domain, leucine rich repeat containing receptor (NLR) signaling pathways|Signaling by EGFR|Signal amplification|Thromboxane signalling through TP receptor|Platelet activation, signaling and aggregation|Signaling by Receptor Tyrosine Kinases
Aanat	2.53161	3.49825	1.56498	0.449162	-1.15469	0.412015	0.682574	Down	0.0169176	0.0160172	0.00886924	0.0159057	0.0348369	0.033518	11298	arylalkylamine N-acetyltransferase	protein_coding	mmu00380	Tryptophan metabolism	GO:0004059,GO:0004060,GO:0005737,GO:0005829,GO:0006474,GO:0007623,GO:0009416,GO:0009648,GO:0010043,GO:0014070,GO:0016740,GO:0016746,GO:0016747,GO:0030187,GO:0032868,GO:0034695,GO:0046688,GO:0048471,GO:0048511,GO:0071320,GO:0071889	aralkylamine N-acetyltransferase activity|arylamine N-acetyltransferase activity|cytoplasm|cytosol|N-terminal protein amino acid acetylation|circadian rhythm|response to light stimulus|photoperiodism|response to zinc ion|response to organic cyclic compound|transferase activity|acyltransferase activity|acyltransferase activity, transferring groups other than amino-acyl groups|melatonin biosyntheti…	WP522,WP79	Biogenic amine synthesis|Tryptophan metabolism	R-MMU-1430728,R-MMU-209776,R-MMU-209931,R-MMU-71291	Metabolism|Metabolism of amine-derived hormones|Serotonin and melatonin biosynthesis|Metabolism of amino acids and derivatives
Aar2	1216.31	1165.22	1267.4	1.08797	0.121643	0.32832	0.609387	Up	10.0533	9.92378	9.12553	7.3296	8.1612	8.46345	68295	AAR2 splicing factor homolog	protein_coding			GO:0000244,GO:0003674,GO:0005575,GO:0005681,GO:0006397,GO:0008380	spliceosomal tri-snRNP complex assembly|molecular_function|cellular_component|spliceosomal complex|mRNA processing|RNA splicing
Aard	237.322	160.96	313.684	1.94522	0.959934	0.00135252	0.0135596	Up	6.26244	5.98457	7.13909	3.06317	1.72746	4.21314	239435	alanine and arginine rich domain containing protein	protein_coding			GO:0003674,GO:0005575,GO:0008150	molecular_function|cellular_component|biological_process
Aars	3575.33	3733.54	3417.12	0.915356	-0.127595	0.317472	0.598523	Down	14.467	15.9492	14.3478	14.1667	15.083	14.4587	234734	alanyl-tRNA synthetase	protein_coding	mmu00970	Aminoacyl-tRNA biosynthesis	GO:0000049,GO:0000166,GO:0002161,GO:0002196,GO:0003676,GO:0003723,GO:0004812,GO:0004813,GO:0005515,GO:0005524,GO:0005737,GO:0005739,GO:0005829,GO:0006400,GO:0006412,GO:0006419,GO:0016597,GO:0016874,GO:0021680,GO:0043039,GO:0043524,GO:0046872,GO:0050885,GO:0050905,GO:0051402,GO:0140018	tRNA binding|nucleotide binding|aminoacyl-tRNA editing activity|Ser-tRNA(Ala) hydrolase activity|nucleic acid binding|RNA binding|aminoacyl-tRNA ligase activity|alanine-tRNA ligase activity|protein binding|ATP binding|cytoplasm|mitochondrion|cytosol|tRNA modification|translation|alanyl-tRNA aminoacylation|amino acid binding|ligase activity|cerebellar Purkinje cell layer development|tRNA aminoacyl…
Aars2	299.855	285.997	313.713	1.09708	0.133663	0.463358	0.723438	Up	2.58503	2.26471	1.9949	1.7499	1.77437	2.06913	224805	alanyl-tRNA synthetase 2%2C mitochondrial	protein_coding	mmu00970	Aminoacyl-tRNA biosynthesis	GO:0000049,GO:0000166,GO:0002161,GO:0003676,GO:0003723,GO:0004812,GO:0004813,GO:0005524,GO:0005737,GO:0005739,GO:0006412,GO:0006419,GO:0016874,GO:0043039,GO:0046872,GO:0070143	tRNA binding|nucleotide binding|aminoacyl-tRNA editing activity|nucleic acid binding|RNA binding|aminoacyl-tRNA ligase activity|alanine-tRNA ligase activity|ATP binding|cytoplasm|mitochondrion|translation|alanyl-tRNA aminoacylation|ligase activity|tRNA aminoacylation|metal ion binding|mitochondrial alanyl-tRNA aminoacylation
Aarsd1	419.235	338.259	500.211	1.4797	0.565305	0.00651937	0.0457926	Up	6.41532	8.68301	8.31118	4.54113	5.17132	4.41781	69684	alanyl-tRNA synthetase domain containing 1	protein_coding			GO:0000166,GO:0002161,GO:0002196,GO:0003676,GO:0004812,GO:0004813,GO:0005515,GO:0005524,GO:0005737,GO:0006412,GO:0006419,GO:0006450,GO:0043039,GO:0046872	nucleotide binding|aminoacyl-tRNA editing activity|Ser-tRNA(Ala) hydrolase activity|nucleic acid binding|aminoacyl-tRNA ligase activity|alanine-tRNA ligase activity|protein binding|ATP binding|cytoplasm|translation|alanyl-tRNA aminoacylation|regulation of translational fidelity|tRNA aminoacylation|metal ion binding
Aasdh	284.645	264.654	304.636	1.14977	0.201349	0.386899	0.661626	Up	1.13808	0.880181	1.17943	0.880275	0.606327	1.00616	231326	aminoadipate-semialdehyde dehydrogenase	protein_coding			GO:0000166,GO:0003674,GO:0005524,GO:0005575,GO:0006629,GO:0006631,GO:0016874,GO:0019482,GO:0043041	nucleotide binding|molecular_function|ATP binding|cellular_component|lipid metabolic process|fatty acid metabolic process|ligase activity|beta-alanine metabolic process|amino acid activation for nonribosomal peptide biosynthetic process
Aasdhppt	878.692	867.196	890.189	1.02606	0.0371085	0.805072	0.914809	Up	7.52001	8.17915	8.7307	6.89084	6.09053	8.41188	67618	aminoadipate-semialdehyde dehydrogenase-phosphopantetheinyl transferase	protein_coding	mmu00770	Pantothenate and CoA biosynthesis	GO:0000287,GO:0005737,GO:0005829,GO:0008897,GO:0009258,GO:0016740,GO:0019878,GO:0046872,GO:0051604	magnesium ion binding|cytoplasm|cytosol|holo-[acyl-carrier-protein] synthase activity|10-formyltetrahydrofolate catabolic process|transferase activity|lysine biosynthetic process via aminoadipic acid|metal ion binding|protein maturation			R-MMU-1430728,R-MMU-196849,R-MMU-196854,R-MMU-199220	Metabolism|Metabolism of water-soluble vitamins and cofactors|Metabolism of vitamins and cofactors|Vitamin B5 (pantothenate) metabolism
Aass	258.101	206.751	309.452	1.49683	0.581913	0.500707	0.749115	Up	0.362393	3.14178	3.41235	1.15577	1.70466	1.28113	30956	aminoadipate-semialdehyde synthase	protein_coding	mmu00310	Lysine degradation	GO:0003824,GO:0004753,GO:0005737,GO:0005739,GO:0006091,GO:0006554,GO:0008152,GO:0016491,GO:0019477,GO:0019878,GO:0043231,GO:0047130,GO:0047131	catalytic activity|saccharopine dehydrogenase activity|cytoplasm|mitochondrion|generation of precursor metabolites and energy|lysine catabolic process|metabolic process|oxidoreductase activity|L-lysine catabolic process|lysine biosynthetic process via aminoadipic acid|intracellular membrane-bounded organelle|saccharopine dehydrogenase (NADP+, L-lysine-forming) activity|saccharopine dehydrogenase …			R-MMU-1430728,R-MMU-71064,R-MMU-71291	Metabolism|Lysine catabolism|Metabolism of amino acids and derivatives
Aatf	794.529	830.858	758.2	0.912168	-0.132629	0.393059	0.667566	Down	7.98069	8.33193	8.26052	7.27219	6.99338	9.99654	56321	apoptosis antagonizing transcription factor	protein_coding			GO:0005515,GO:0005634,GO:0005654,GO:0005667,GO:0005730,GO:0005737,GO:0005829,GO:0006357,GO:0007155,GO:0007346,GO:0019901,GO:0032040,GO:0032929,GO:0040016,GO:0042254,GO:0042274,GO:0042985,GO:0043066,GO:0043522,GO:0045893,GO:0045944,GO:0048156,GO:2000378,GO:2001234	protein binding|nucleus|nucleoplasm|transcription regulator complex|nucleolus|cytoplasm|cytosol|regulation of transcription by RNA polymerase II|cell adhesion|regulation of mitotic cell cycle|protein kinase binding|small-subunit processome|negative regulation of superoxide anion generation|embryonic cleavage|ribosome biogenesis|ribosomal small subunit biogenesis|negative regulation of amyloid pre…
Aatk	109.121	120.996	97.2459	0.803605	-0.315441	0.521979	0.762496	Down	0.659116	0.163854	0.320454	0.546993	0.314672	0.393952	11302	apoptosis-associated tyrosine kinase	protein_coding			GO:0000166,GO:0004672,GO:0004674,GO:0004713,GO:0005524,GO:0005737,GO:0006468,GO:0006915,GO:0007420,GO:0016020,GO:0016301,GO:0016310,GO:0016740,GO:0038083,GO:0042995,GO:0051402	nucleotide binding|protein kinase activity|protein serine/threonine kinase activity|protein tyrosine kinase activity|ATP binding|cytoplasm|protein phosphorylation|apoptotic process|brain development|membrane|kinase activity|phosphorylation|transferase activity|peptidyl-tyrosine autophosphorylation|cell projection|neuron apoptotic process
Abat	1116.27	936.825	1295.71	1.38309	0.467895	0.542896	0.775291	Up	1.59968	9.74254	11.8125	4.73069	5.4259	4.84399	268860	4-aminobutyrate aminotransferase	protein_coding	mmu00640,mmu00650,mmu00250,mmu00280,mmu00410,mmu04727	Propanoate metabolism|Butanoate metabolism|Alanine, aspartate and glutamate metabolism|Valine, leucine and isoleucine degradation|beta-Alanine metabolism|GABAergic synapse	GO:0001666,GO:0003824,GO:0003867,GO:0005739,GO:0005759,GO:0007620,GO:0007626,GO:0008483,GO:0009410,GO:0009448,GO:0009449,GO:0009450,GO:0010039,GO:0014053,GO:0016740,GO:0030170,GO:0031652,GO:0032024,GO:0032144,GO:0033602,GO:0034386,GO:0035094,GO:0035640,GO:0042135,GO:0042220,GO:0042802,GO:0045471,GO:0045776,GO:0045964,GO:0046872,GO:0047298,GO:0048148,GO:0051536,GO:0070474,GO:0097151,GO:1902722,GO:…	response to hypoxia|catalytic activity|4-aminobutyrate transaminase activity|mitochondrion|mitochondrial matrix|copulation|locomotory behavior|transaminase activity|response to xenobiotic stimulus|gamma-aminobutyric acid metabolic process|gamma-aminobutyric acid biosynthetic process|gamma-aminobutyric acid catabolic process|response to iron ion|negative regulation of gamma-aminobutyric acid secre…	WP240	Alanine and aspartate metabolism	R-MMU-112310,R-MMU-112315,R-MMU-112316,R-MMU-888590,R-MMU-916853	Neurotransmitter release cycle|Transmission across Chemical Synapses|Neuronal System|GABA synthesis, release, reuptake and degradation|Degradation of GABA
Abca1	11130.6	13451.7	8809.44	0.654877	-0.610705	6.33459e-06	0.000150747	Down	26.3236	20.636	23.4483	31.4117	27.6817	37.2873	11303	ATP-binding cassette%2C sub-family A (ABC1)%2C member 1	protein_coding	mmu02010,mmu04975,mmu04979,mmu05417	ABC transporters|Fat digestion and absorption|Cholesterol metabolism|Lipid and atherosclerosis	GO:0000166,GO:0002790,GO:0005102,GO:0005515,GO:0005524,GO:0005548,GO:0005768,GO:0005794,GO:0005886,GO:0006497,GO:0006911,GO:0007040,GO:0007186,GO:0007189,GO:0008035,GO:0008203,GO:0008320,GO:0009306,GO:0009897,GO:0009986,GO:0010875,GO:0015914,GO:0015918,GO:0016020,GO:0016197,GO:0016323,GO:0016887,GO:0019905,GO:0023061,GO:0030139,GO:0030301,GO:0031210,GO:0031267,GO:0032367,GO:0032489,GO:0033344,GO:…	nucleotide binding|peptide secretion|signaling receptor binding|protein binding|ATP binding|phospholipid transporter activity|endosome|Golgi apparatus|plasma membrane|protein lipidation|phagocytosis, engulfment|lysosome organization|G protein-coupled receptor signaling pathway|adenylate cyclase-activating G protein-coupled receptor signaling pathway|high-density lipoprotein particle binding|chole…	WP431,WP1,WP4346	Nuclear receptors in lipid metabolism and toxicity|Statin pathway|Cholesterol metabolism with Bloch and Kandutsch-Russell pathways	R-MMU-162582,R-MMU-174824,R-MMU-382551,R-MMU-8963896,R-MMU-8963898,R-MMU-9006931,R-MMU-9024446,R-MMU-9029569	Signal Transduction|Plasma lipoprotein assembly, remodeling, and clearance|Transport of small molecules|HDL assembly|Plasma lipoprotein assembly|Signaling by Nuclear Receptors|NR1H2 and NR1H3-mediated signaling|NR1H3 & NR1H2 regulate gene expression linked to cholesterol transport and efflux
Abca12	6.44245	10.3399	2.54502	0.244119	-2.03434	0.0833625	0.276379	Down	0.00631944	0.00598313	0.0132522	0.0237659	0.00650654	0.0657323	74591	ATP-binding cassette%2C sub-family A (ABC1)%2C member 12	protein_coding	mmu02010	ABC transporters	GO:0000139,GO:0000166,GO:0003336,GO:0005102,GO:0005319,GO:0005515,GO:0005524,GO:0005737,GO:0005743,GO:0005794,GO:0005829,GO:0005886,GO:0006672,GO:0006869,GO:0006886,GO:0010875,GO:0016020,GO:0016887,GO:0030216,GO:0031410,GO:0031424,GO:0032379,GO:0032940,GO:0033344,GO:0033700,GO:0034191,GO:0035627,GO:0042626,GO:0043129,GO:0043231,GO:0043589,GO:0045055,GO:0045616,GO:0048286,GO:0051649,GO:0055085,GO:…	Golgi membrane|nucleotide binding|corneocyte desquamation|signaling receptor binding|lipid transporter activity|protein binding|ATP binding|cytoplasm|mitochondrial inner membrane|Golgi apparatus|cytosol|plasma membrane|ceramide metabolic process|lipid transport|intracellular protein transport|positive regulation of cholesterol efflux|membrane|ATP hydrolysis activity|keratinocyte differentiation|c…			R-MMU-1369062,R-MMU-382551,R-MMU-382556	ABC transporters in lipid homeostasis|Transport of small molecules|ABC-family proteins mediated transport
Abca13	68.9497	63.1877	74.7117	1.18521	0.245137	0.554561	0.782734	Up	0.167697	0.110841	0.0962112	0.0624718	0.130311	0.0893315	268379	ATP-binding cassette%2C sub-family A (ABC1)%2C member 13	protein_coding	mmu02010	ABC transporters	GO:0000166,GO:0005319,GO:0005524,GO:0006869,GO:0016020,GO:0016887,GO:0031410,GO:0032376,GO:0035627,GO:0042626,GO:0043231,GO:0055085,GO:0097708,GO:0140359,GO:1900244	nucleotide binding|lipid transporter activity|ATP binding|lipid transport|membrane|ATP hydrolysis activity|cytoplasmic vesicle|positive regulation of cholesterol transport|ceramide transport|ATPase-coupled transmembrane transporter activity|intracellular membrane-bounded organelle|transmembrane transport|intracellular vesicle|ABC-type transporter activity|positive regulation of synaptic vesicle e…			R-MMU-168249,R-MMU-168256,R-MMU-6798695	Innate Immune System|Immune System|Neutrophil degranulation
Abca14	3.3039	4.06278	2.54502	0.631444	-0.663274	0.654965	0.841992	Down	0.00895873	0.00848196	0.0187869	0.00421146	0.0415078	0.00443739	67928	ATP-binding cassette%2C sub-family A (ABC1)%2C member 14	protein_coding	mmu02010	ABC transporters	GO:0005319,GO:0006869,GO:0042626,GO:0043231	lipid transporter activity|lipid transport|ATPase-coupled transmembrane transporter activity|intracellular membrane-bounded organelle
Abca16	4.97446	5.55214	4.39679	0.792034	-0.336366	0.776545	0.900705	Down	0.0493125	0.00466881	0.0155116	0.0324542	0.020309	0.0244252	233810	ATP-binding cassette%2C sub-family A (ABC1)%2C member 16	protein_coding	mmu02010	ABC transporters	GO:0005319,GO:0006869,GO:0042626,GO:0043231	lipid transporter activity|lipid transport|ATPase-coupled transmembrane transporter activity|intracellular membrane-bounded organelle
Abca17	17.1812	15.6933	18.6691	1.18917	0.249953	0.701378	0.863997	Up	0.0521241	0.0658002	0.0874455	0.0784106	0.039356	0.0344238	381072	ATP-binding cassette%2C sub-family A (ABC1)%2C member 17	protein_coding	mmu02010	ABC transporters	GO:0000166,GO:0005319,GO:0005524,GO:0005737,GO:0005783,GO:0006629,GO:0006638,GO:0006869,GO:0016020,GO:0016887,GO:0042626,GO:0043231,GO:0055085,GO:0140359	nucleotide binding|lipid transporter activity|ATP binding|cytoplasm|endoplasmic reticulum|lipid metabolic process|neutral lipid metabolic process|lipid transport|membrane|ATP hydrolysis activity|ATPase-coupled transmembrane transporter activity|intracellular membrane-bounded organelle|transmembrane transport|ABC-type transporter activity
Abca2	400.882	340.038	461.726	1.35759	0.441049	0.0651969	0.234916	Up	1.1543	1.11113	1.25832	0.514311	0.80886	1.01935	11305	ATP-binding cassette%2C sub-family A (ABC1)%2C member 2	protein_coding	mmu02010,mmu04142	ABC transporters|Lysosome	GO:0000166,GO:0001573,GO:0005319,GO:0005524,GO:0005764,GO:0005765,GO:0005768,GO:0005815,GO:0005886,GO:0006684,GO:0006687,GO:0006869,GO:0007626,GO:0008203,GO:0010008,GO:0016020,GO:0016887,GO:0019218,GO:0031410,GO:0032289,GO:0032383,GO:0032384,GO:0032805,GO:0042626,GO:0042986,GO:0043231,GO:0045939,GO:0046512,GO:0055085,GO:0060049,GO:0061135,GO:0071072,GO:0090155,GO:0090156,GO:0090370,GO:0099038,GO:…	nucleotide binding|ganglioside metabolic process|lipid transporter activity|ATP binding|lysosome|lysosomal membrane|endosome|microtubule organizing center|plasma membrane|sphingomyelin metabolic process|glycosphingolipid metabolic process|lipid transport|locomotory behavior|cholesterol metabolic process|endosome membrane|membrane|ATP hydrolysis activity|regulation of steroid metabolic process|cyt…
Abca3	3632.33	3868.38	3396.28	0.87797	-0.187756	0.163079	0.415142	Down	12.5655	14.8265	15.5478	14.4639	14.3576	14.9151	27410	ATP-binding cassette%2C sub-family A (ABC1)%2C member 3	protein_coding	mmu02010	ABC transporters	GO:0000166,GO:0005319,GO:0005524,GO:0005764,GO:0005768,GO:0005770,GO:0005886,GO:0006810,GO:0006855,GO:0006869,GO:0008559,GO:0010875,GO:0015914,GO:0016020,GO:0016887,GO:0030324,GO:0030659,GO:0031410,GO:0032368,GO:0032464,GO:0042599,GO:0042626,GO:0042908,GO:0043129,GO:0043231,GO:0046470,GO:0046471,GO:0046618,GO:0046890,GO:0055085,GO:0055091,GO:0070925,GO:0097208,GO:0097232,GO:0097233,GO:0120019,GO:…	nucleotide binding|lipid transporter activity|ATP binding|lysosome|endosome|late endosome|plasma membrane|transport|xenobiotic transmembrane transport|lipid transport|ABC-type xenobiotic transporter activity|positive regulation of cholesterol efflux|phospholipid transport|membrane|ATP hydrolysis activity|lung development|cytoplasmic vesicle membrane|cytoplasmic vesicle|regulation of lipid transpo…			R-MMU-1369062,R-MMU-382551,R-MMU-382556,R-MMU-392499,R-MMU-5683826	ABC transporters in lipid homeostasis|Transport of small molecules|ABC-family proteins mediated transport|Metabolism of proteins|Surfactant metabolism
Abca4	114.88	158.948	70.8113	0.445055	-1.16795	9.96911e-05	0.00161267	Down	0.210653	0.212563	0.197625	0.463863	0.282527	0.507968	11304	ATP-binding cassette%2C sub-family A (ABC1)%2C member 4	protein_coding	mmu02010	ABC transporters	GO:0000166,GO:0001750,GO:0005502,GO:0005503,GO:0005524,GO:0005548,GO:0005783,GO:0005886,GO:0006649,GO:0006869,GO:0007601,GO:0016020,GO:0016887,GO:0031410,GO:0042574,GO:0042626,GO:0042995,GO:0043231,GO:0045332,GO:0045494,GO:0050896,GO:0055085,GO:0090555,GO:0140326,GO:0140327,GO:0140347,GO:0140359	nucleotide binding|photoreceptor outer segment|11-cis retinal binding|all-trans retinal binding|ATP binding|phospholipid transporter activity|endoplasmic reticulum|plasma membrane|phospholipid transfer to membrane|lipid transport|visual perception|membrane|ATP hydrolysis activity|cytoplasmic vesicle|retinal metabolic process|ATPase-coupled transmembrane transporter activity|cell projection|intrac…			R-MMU-2187338,R-MMU-2453902,R-MMU-382551,R-MMU-382556,R-MMU-9709957	Visual phototransduction|The canonical retinoid cycle in rods (twilight vision)|Transport of small molecules|ABC-family proteins mediated transport|Sensory Perception
Abca5	1531.15	1534.35	1527.95	0.995638	-0.00630693	0.973632	0.990624	Down	4.21079	4.90508	6.2692	3.98287	4.24704	5.67414	217265	ATP-binding cassette%2C sub-family A (ABC1)%2C member 5	protein_coding	mmu02010	ABC transporters	GO:0000166,GO:0005319,GO:0005524,GO:0005764,GO:0005768,GO:0005770,GO:0005794,GO:0005886,GO:0006869,GO:0008203,GO:0010745,GO:0010874,GO:0016020,GO:0016887,GO:0033344,GO:0034375,GO:0042626,GO:0042632,GO:0043691,GO:0055085,GO:0140359,GO:1903064	nucleotide binding|lipid transporter activity|ATP binding|lysosome|endosome|late endosome|Golgi apparatus|plasma membrane|lipid transport|cholesterol metabolic process|negative regulation of macrophage derived foam cell differentiation|regulation of cholesterol efflux|membrane|ATP hydrolysis activity|cholesterol efflux|high-density lipoprotein particle remodeling|ATPase-coupled transmembrane tran…			R-MMU-1369062,R-MMU-382551,R-MMU-382556	ABC transporters in lipid homeostasis|Transport of small molecules|ABC-family proteins mediated transport
Abca6	10.1855	9.37626	10.9948	1.17261	0.229717	0.772642	0.898667	Up	0.0253692	0.0510406	0.0332503	0.0417408	0.0195902	0.02199	76184	ATP-binding cassette%2C sub-family A (ABC1)%2C member 6	protein_coding	mmu02010	ABC transporters	GO:0000139,GO:0000166,GO:0005319,GO:0005524,GO:0005654,GO:0005794,GO:0005886,GO:0006869,GO:0016020,GO:0042626,GO:0043231,GO:0140359	Golgi membrane|nucleotide binding|lipid transporter activity|ATP binding|nucleoplasm|Golgi apparatus|plasma membrane|lipid transport|membrane|ATPase-coupled transmembrane transporter activity|intracellular membrane-bounded organelle|ABC-type transporter activity			R-MMU-1369062,R-MMU-382551,R-MMU-382556	ABC transporters in lipid homeostasis|Transport of small molecules|ABC-family proteins mediated transport
Abca7	790.111	795.86	784.363	0.985342	-0.0213042	0.8728	0.946474	Down	3.54167	3.03824	3.14316	2.79265	2.69561	3.35728	27403	ATP-binding cassette%2C sub-family A (ABC1)%2C member 7	protein_coding	mmu02010	ABC transporters	GO:0000166,GO:0001891,GO:0005515,GO:0005524,GO:0005548,GO:0005622,GO:0005737,GO:0005768,GO:0005794,GO:0005886,GO:0006869,GO:0006909,GO:0007613,GO:0008542,GO:0009986,GO:0010875,GO:0016020,GO:0016324,GO:0016887,GO:0018149,GO:0019216,GO:0030054,GO:0032587,GO:0033344,GO:0033700,GO:0034188,GO:0034205,GO:0034380,GO:0034504,GO:0038027,GO:0042626,GO:0042985,GO:0042995,GO:0043231,GO:0043409,GO:0044857,GO:…	nucleotide binding|phagocytic cup|protein binding|ATP binding|phospholipid transporter activity|intracellular anatomical structure|cytoplasm|endosome|Golgi apparatus|plasma membrane|lipid transport|phagocytosis|memory|visual learning|cell surface|positive regulation of cholesterol efflux|membrane|apical plasma membrane|ATP hydrolysis activity|peptide cross-linking|regulation of lipid metabolic pr…			R-MMU-1369062,R-MMU-382551,R-MMU-382556	ABC transporters in lipid homeostasis|Transport of small molecules|ABC-family proteins mediated transport
Abca8a	47.0528	58.0976	36.0079	0.620509	-0.688476	0.107685	0.324569	Down	0.176607	0.178609	0.101005	0.271708	0.185968	0.198809	217258	ATP-binding cassette%2C sub-family A (ABC1)%2C member 8a	protein_coding	mmu02010	ABC transporters	GO:0000166,GO:0005319,GO:0005524,GO:0005783,GO:0005886,GO:0006686,GO:0006869,GO:0008559,GO:0010874,GO:0010875,GO:0016020,GO:0016887,GO:0030301,GO:0033344,GO:0042626,GO:0042908,GO:0043231,GO:0055085,GO:0140359	nucleotide binding|lipid transporter activity|ATP binding|endoplasmic reticulum|plasma membrane|sphingomyelin biosynthetic process|lipid transport|ABC-type xenobiotic transporter activity|regulation of cholesterol efflux|positive regulation of cholesterol efflux|membrane|ATP hydrolysis activity|cholesterol transport|cholesterol efflux|ATPase-coupled transmembrane transporter activity|xenobiotic t…
Abca8b	103.269	168.237	38.3007	0.227614	-2.13534	0.00518738	0.0385483	Down	0.0229852	0.133681	0.241005	0.497041	0.875631	0.14963	27404	ATP-binding cassette%2C sub-family A (ABC1)%2C member 8b	protein_coding	mmu02010	ABC transporters	GO:0000166,GO:0005319,GO:0005524,GO:0005743,GO:0005783,GO:0005886,GO:0006686,GO:0006810,GO:0006869,GO:0008559,GO:0010874,GO:0010875,GO:0016020,GO:0016323,GO:0016887,GO:0030301,GO:0033344,GO:0042626,GO:0042908,GO:0043231,GO:0055085,GO:0140359	nucleotide binding|lipid transporter activity|ATP binding|mitochondrial inner membrane|endoplasmic reticulum|plasma membrane|sphingomyelin biosynthetic process|transport|lipid transport|ABC-type xenobiotic transporter activity|regulation of cholesterol efflux|positive regulation of cholesterol efflux|membrane|basolateral plasma membrane|ATP hydrolysis activity|cholesterol transport|cholesterol ef…			R-MMU-382551,R-MMU-382556	Transport of small molecules|ABC-family proteins mediated transport
Abca9	342.627	368.452	316.803	0.85936	-0.218666	0.413611	0.683669	Down	0.860144	1.10714	1.59879	1.37011	1.02467	1.31333	217262	ATP-binding cassette%2C sub-family A (ABC1)%2C member 9	protein_coding	mmu02010	ABC transporters	GO:0000166,GO:0005319,GO:0005524,GO:0005739,GO:0006869,GO:0016020,GO:0016887,GO:0042626,GO:0043231,GO:0055085,GO:0140359	nucleotide binding|lipid transporter activity|ATP binding|mitochondrion|lipid transport|membrane|ATP hydrolysis activity|ATPase-coupled transmembrane transporter activity|intracellular membrane-bounded organelle|transmembrane transport|ABC-type transporter activity			R-MMU-1369062,R-MMU-382551,R-MMU-382556	ABC transporters in lipid homeostasis|Transport of small molecules|ABC-family proteins mediated transport
Abcb10	1878.87	2119.66	1638.08	0.772953	-0.371548	0.00384359	0.0306073	Down	9.99676	10.0722	10.1638	11.6965	12.0642	11.1164	56199	ATP-binding cassette%2C sub-family B (MDR/TAP)%2C member 10	protein_coding	mmu02010	ABC transporters	GO:0000166,GO:0005515,GO:0005524,GO:0005739,GO:0005743,GO:0006783,GO:0016020,GO:0016887,GO:0031966,GO:0034514,GO:0042802,GO:0042803,GO:0045648,GO:0046985,GO:0048821,GO:0055085,GO:0140359	nucleotide binding|protein binding|ATP binding|mitochondrion|mitochondrial inner membrane|heme biosynthetic process|membrane|ATP hydrolysis activity|mitochondrial membrane|mitochondrial unfolded protein response|identical protein binding|protein homodimerization activity|positive regulation of erythrocyte differentiation|positive regulation of hemoglobin biosynthetic process|erythrocyte developme…
Abcb11	34.5712	53.7744	15.3681	0.286663	-1.80257	0.000130338	0.00200907	Down	0.0718167	0.089243	0.0564761	0.181464	0.281907	0.217877	27413	ATP-binding cassette%2C sub-family B (MDR/TAP)%2C member 11	protein_coding	mmu02010,mmu04976,mmu04979,mmu01522	ABC transporters|Bile secretion|Cholesterol metabolism|Endocrine resistance	GO:0000139,GO:0000166,GO:0005524,GO:0005768,GO:0005886,GO:0006631,GO:0006805,GO:0006855,GO:0006869,GO:0008206,GO:0008559,GO:0009410,GO:0009986,GO:0015125,GO:0015126,GO:0015144,GO:0015432,GO:0015721,GO:0015722,GO:0016020,GO:0016324,GO:0016567,GO:0016887,GO:0031998,GO:0042632,GO:0045177,GO:0046581,GO:0046618,GO:0046691,GO:0055037,GO:0055038,GO:0055085,GO:0055088,GO:0055091,GO:0120189,GO:0140359,GO:…	Golgi membrane|nucleotide binding|ATP binding|endosome|plasma membrane|fatty acid metabolic process|xenobiotic metabolic process|xenobiotic transmembrane transport|lipid transport|bile acid metabolic process|ABC-type xenobiotic transporter activity|response to xenobiotic stimulus|cell surface|bile acid transmembrane transporter activity|canalicular bile acid transmembrane transporter activity|car…	WP431	Nuclear receptors in lipid metabolism and toxicity	R-MMU-1430728,R-MMU-159418,R-MMU-192105,R-MMU-193368,R-MMU-194068,R-MMU-556833,R-MMU-8957322	Metabolism|Recycling of bile acids and salts|Synthesis of bile acids and bile salts|Synthesis of bile acids and bile salts via 7alpha-hydroxycholesterol|Bile acid and bile salt metabolism|Metabolism of lipids|Metabolism of steroids
Abcb1a	1621.95	1193.42	2050.48	1.71772	0.780499	0.00664865	0.0465383	Up	14.6096	8.4551	10.0188	5.54974	3.56702	8.28306	18671	ATP-binding cassette%2C sub-family B (MDR/TAP)%2C member 1A	protein_coding	mmu02010,mmu04976,mmu05206,mmu05226	ABC transporters|Bile secretion|MicroRNAs in cancer|Gastric cancer	GO:0000086,GO:0000166,GO:0005524,GO:0005737,GO:0005886,GO:0008559,GO:0009986,GO:0015562,GO:0016020,GO:0016324,GO:0016887,GO:0022857,GO:0031625,GO:0042626,GO:0042910,GO:0045332,GO:0046581,GO:0046865,GO:0046943,GO:0047484,GO:0055085,GO:0070633,GO:0072089,GO:0090554,GO:0090555,GO:0099038,GO:0099040,GO:0140115,GO:0140326,GO:0140328,GO:0140359,GO:1901529,GO:1905039,GO:1990961,GO:1990962,GO:2001225	G2/M transition of mitotic cell cycle|nucleotide binding|ATP binding|cytoplasm|plasma membrane|ABC-type xenobiotic transporter activity|cell surface|efflux transmembrane transporter activity|membrane|apical plasma membrane|ATP hydrolysis activity|transmembrane transporter activity|ubiquitin protein ligase binding|ATPase-coupled transmembrane transporter activity|xenobiotic transmembrane transport…	WP431	Nuclear receptors in lipid metabolism and toxicity	R-MMU-382551,R-MMU-382556,R-MMU-9748784,R-MMU-9754706,R-MMU-9757110	Transport of small molecules|ABC-family proteins mediated transport|Drug ADME|Atorvastatin ADME|Prednisone ADME
Abcb1b	3099.61	2402.17	3797.06	1.58043	0.660317	0.00636857	0.0450002	Up	18.3988	17.9938	27.1045	9.95067	9.25731	17.1398	18669	ATP-binding cassette%2C sub-family B (MDR/TAP)%2C member 1B	protein_coding	mmu02010,mmu04976,mmu05206,mmu05226	ABC transporters|Bile secretion|MicroRNAs in cancer|Gastric cancer	GO:0000086,GO:0000139,GO:0000166,GO:0005524,GO:0005737,GO:0005739,GO:0005886,GO:0006869,GO:0008559,GO:0009410,GO:0009986,GO:0014045,GO:0015562,GO:0016020,GO:0016324,GO:0016887,GO:0031625,GO:0042626,GO:0042910,GO:0045332,GO:0046581,GO:0046943,GO:0047484,GO:0055085,GO:0061843,GO:0070633,GO:0072089,GO:0090554,GO:0090555,GO:0098591,GO:0099038,GO:0099040,GO:0140115,GO:0140326,GO:0140328,GO:0140359,GO:…	G2/M transition of mitotic cell cycle|Golgi membrane|nucleotide binding|ATP binding|cytoplasm|mitochondrion|plasma membrane|lipid transport|ABC-type xenobiotic transporter activity|response to xenobiotic stimulus|cell surface|establishment of endothelial blood-brain barrier|efflux transmembrane transporter activity|membrane|apical plasma membrane|ATP hydrolysis activity|ubiquitin protein ligase b…
Abcb4	15.568	19.8171	11.3189	0.570201	-0.810457	0.307655	0.586942	Down	0.0440193	0.107168	0.0725297	0.0413865	0.103594	0.218034	18670	ATP-binding cassette%2C sub-family B (MDR/TAP)%2C member 4	protein_coding	mmu02010,mmu04976	ABC transporters|Bile secretion	GO:0000139,GO:0000166,GO:0005524,GO:0005654,GO:0005737,GO:0005829,GO:0005886,GO:0005925,GO:0006855,GO:0006869,GO:0016020,GO:0016324,GO:0016887,GO:0031410,GO:0032376,GO:0032782,GO:0042626,GO:0045332,GO:0046581,GO:0055085,GO:0055088,GO:0061092,GO:0090554,GO:0140326,GO:0140359,GO:1901557,GO:1903413,GO:2001140	Golgi membrane|nucleotide binding|ATP binding|nucleoplasm|cytoplasm|cytosol|plasma membrane|focal adhesion|xenobiotic transmembrane transport|lipid transport|membrane|apical plasma membrane|ATP hydrolysis activity|cytoplasmic vesicle|positive regulation of cholesterol transport|bile acid secretion|ATPase-coupled transmembrane transporter activity|phospholipid translocation|intercellular canalicul…	WP431,WP310	Nuclear receptors in lipid metabolism and toxicity|mRNA processing	R-MMU-382551,R-MMU-382556	Transport of small molecules|ABC-family proteins mediated transport
Abcb5	2.23017	1.34113	3.11921	2.3016	1.20264	0.49222	0.743074	Up	0.0429612	0.0116214	0.00643511	0.0115405	0	0.0121596	77706	ATP-binding cassette%2C sub-family B (MDR/TAP)%2C member 5	protein_coding	mmu02010	ABC transporters	GO:0000166,GO:0001654,GO:0005524,GO:0005886,GO:0008559,GO:0015562,GO:0016020,GO:0016887,GO:0030154,GO:0042391,GO:0042626,GO:0055085,GO:0140359	nucleotide binding|eye development|ATP binding|plasma membrane|ABC-type xenobiotic transporter activity|efflux transmembrane transporter activity|membrane|ATP hydrolysis activity|cell differentiation|regulation of membrane potential|ATPase-coupled transmembrane transporter activity|transmembrane transport|ABC-type transporter activity			R-MMU-382551,R-MMU-382556	Transport of small molecules|ABC-family proteins mediated transport
Abcb6	249.297	220.25	278.344	1.26473	0.33883	0.13169	0.366098	Up	2.44755	2.46314	2.62913	2.01955	1.8063	1.46664	74104	ATP-binding cassette%2C sub-family B (MDR/TAP)%2C member 6	protein_coding	mmu02010	ABC transporters	GO:0000166,GO:0005524,GO:0005576,GO:0005654,GO:0005739,GO:0005740,GO:0005741,GO:0005764,GO:0005765,GO:0005768,GO:0005774,GO:0005783,GO:0005789,GO:0005794,GO:0005829,GO:0005886,GO:0006778,GO:0006779,GO:0006810,GO:0006878,GO:0007420,GO:0015439,GO:0015562,GO:0015886,GO:0016020,GO:0016887,GO:0020037,GO:0031901,GO:0031902,GO:0032585,GO:0033013,GO:0033162,GO:0035351,GO:0036020,GO:0042168,GO:0043588,GO:…	nucleotide binding|ATP binding|extracellular region|nucleoplasm|mitochondrion|mitochondrial envelope|mitochondrial outer membrane|lysosome|lysosomal membrane|endosome|vacuolar membrane|endoplasmic reticulum|endoplasmic reticulum membrane|Golgi apparatus|cytosol|plasma membrane|porphyrin-containing compound metabolic process|porphyrin-containing compound biosynthetic process|transport|intracellula…			R-MMU-1369007,R-MMU-382551,R-MMU-382556	Mitochondrial ABC transporters|Transport of small molecules|ABC-family proteins mediated transport
Abcb7	635.496	575.871	695.121	1.20648	0.270799	0.0908335	0.29187	Up	3.3107	2.92266	3.83045	2.27548	2.28031	2.9223	11306	ATP-binding cassette%2C sub-family B (MDR/TAP)%2C member 7	protein_coding	mmu02010	ABC transporters	GO:0000166,GO:0005515,GO:0005524,GO:0005739,GO:0005743,GO:0006879,GO:0016020,GO:0016226,GO:0016887,GO:0034755,GO:0042626,GO:0042803,GO:0055085,GO:0070455,GO:0140359,GO:0140466,GO:0140481,GO:1903331,GO:1903427	nucleotide binding|protein binding|ATP binding|mitochondrion|mitochondrial inner membrane|intracellular iron ion homeostasis|membrane|iron-sulfur cluster assembly|ATP hydrolysis activity|iron ion transmembrane transport|ATPase-coupled transmembrane transporter activity|protein homodimerization activity|transmembrane transport|positive regulation of heme biosynthetic process|ABC-type transporter a…			R-MMU-1369007,R-MMU-382551,R-MMU-382556	Mitochondrial ABC transporters|Transport of small molecules|ABC-family proteins mediated transport
Abcb8	1253.26	1097.24	1409.27	1.28445	0.36115	0.00638266	0.0450613	Up	7.30561	6.61927	6.39456	4.96308	4.36589	4.8007	74610	ATP-binding cassette%2C sub-family B (MDR/TAP)%2C member 8	protein_coding	mmu02010	ABC transporters	GO:0000166,GO:0005524,GO:0005654,GO:0005730,GO:0005739,GO:0005743,GO:0006811,GO:0006813,GO:0006884,GO:0015440,GO:0016020,GO:0016887,GO:0031966,GO:0055085,GO:0062157,GO:0071805,GO:0140141,GO:0140359	nucleotide binding|ATP binding|nucleoplasm|nucleolus|mitochondrion|mitochondrial inner membrane|monoatomic ion transport|potassium ion transport|cell volume homeostasis|ABC-type peptide transporter activity|membrane|ATP hydrolysis activity|mitochondrial membrane|transmembrane transport|mitochondrial ATP-gated potassium channel complex|potassium ion transmembrane transport|mitochondrial potassium …			R-MMU-1369007,R-MMU-382551,R-MMU-382556	Mitochondrial ABC transporters|Transport of small molecules|ABC-family proteins mediated transport
Abcb9	281.231	318.526	243.936	0.765993	-0.384597	0.0968902	0.303552	Down	1.75988	1.15392	1.15123	1.37803	1.57399	1.80063	56325	ATP-binding cassette%2C sub-family B (MDR/TAP)%2C member 9	protein_coding	mmu02010,mmu04142	ABC transporters|Lysosome	GO:0000166,GO:0005524,GO:0005764,GO:0005765,GO:0005789,GO:0006518,GO:0015031,GO:0015421,GO:0015440,GO:0015833,GO:0016020,GO:0016887,GO:0022857,GO:0042626,GO:0042803,GO:0043231,GO:0055085,GO:0140359	nucleotide binding|ATP binding|lysosome|lysosomal membrane|endoplasmic reticulum membrane|peptide metabolic process|protein transport|ABC-type oligopeptide transporter activity|ABC-type peptide transporter activity|peptide transport|membrane|ATP hydrolysis activity|transmembrane transporter activity|ATPase-coupled transmembrane transporter activity|protein homodimerization activity|intracellular …			R-MMU-382551,R-MMU-382556	Transport of small molecules|ABC-family proteins mediated transport
Abcc1	1329.67	1259.49	1399.85	1.11128	0.152226	0.562404	0.787402	Up	6.42192	4.36451	3.94269	4.59936	2.61065	4.67514	17250	ATP-binding cassette%2C sub-family C (CFTR/MRP)%2C member 1	protein_coding	mmu02010,mmu04071,mmu04977,mmu05206,mmu01523	ABC transporters|Sphingolipid signaling pathway|Vitamin digestion and absorption|MicroRNAs in cancer|Antifolate resistance	GO:0000166,GO:0005324,GO:0005524,GO:0005886,GO:0006869,GO:0006979,GO:0008559,GO:0009410,GO:0009925,GO:0010001,GO:0015420,GO:0015431,GO:0015562,GO:0015889,GO:0015911,GO:0016020,GO:0016323,GO:0016324,GO:0016328,GO:0016787,GO:0016887,GO:0022857,GO:0030335,GO:0033700,GO:0034040,GO:0034634,GO:0034775,GO:0042887,GO:0042908,GO:0042910,GO:0045332,GO:0046943,GO:0048708,GO:0050729,GO:0055085,GO:0060326,GO:…	nucleotide binding|long-chain fatty acid transporter activity|ATP binding|plasma membrane|lipid transport|response to oxidative stress|ABC-type xenobiotic transporter activity|response to xenobiotic stimulus|basal plasma membrane|glial cell differentiation|ABC-type vitamin B12 transporter activity|ABC-type glutathione S-conjugate transporter activity|efflux transmembrane transporter activity|coba…			R-MMU-1430728,R-MMU-189445,R-MMU-189483,R-MMU-196741,R-MMU-196849,R-MMU-196854,R-MMU-2142691,R-MMU-2142753,R-MMU-2262752,R-MMU-382551,R-MMU-382556,R-MMU-556833,R-MMU-8953897,R-MMU-8978868,R-MMU-9707564,R-MMU-9711123,R-MMU-9748784,R-MMU-9753281,R-MMU-9758890	Metabolism|Metabolism of porphyrins|Heme degradation|Cobalamin (Cbl, vitamin B12) transport and metabolism|Metabolism of water-soluble vitamins and cofactors|Metabolism of vitamins and cofactors|Synthesis of Leukotrienes (LT) and Eoxins (EX)|Arachidonic acid metabolism|Cellular responses to stress|Transport of small molecules|ABC-family proteins mediated transport|Metabolism of lipids|Cellular re…
Abcc10	493.995	571.813	416.178	0.728138	-0.457717	0.189258	0.452856	Down	1.2958	1.44807	1.92294	1.44465	2.94172	1.26963	224814	ATP-binding cassette%2C sub-family C (CFTR/MRP)%2C member 10	protein_coding	mmu02010	ABC transporters	GO:0000166,GO:0005524,GO:0005886,GO:0006691,GO:0006869,GO:0008559,GO:0009925,GO:0015431,GO:0016020,GO:0016323,GO:0016887,GO:0042626,GO:0055085,GO:0071716,GO:0140359	nucleotide binding|ATP binding|plasma membrane|leukotriene metabolic process|lipid transport|ABC-type xenobiotic transporter activity|basal plasma membrane|ABC-type glutathione S-conjugate transporter activity|membrane|basolateral plasma membrane|ATP hydrolysis activity|ATPase-coupled transmembrane transporter activity|transmembrane transport|leukotriene transport|ABC-type transporter activity			R-MMU-382551,R-MMU-382556	Transport of small molecules|ABC-family proteins mediated transport
Abcc12	305.06	323.436	286.684	0.885726	-0.175067	0.572272	0.792979	Down	1.95555	1.41137	1.49021	1.86873	0.918702	2.14894	244562	ATP-binding cassette%2C sub-family C (CFTR/MRP)%2C member 12	protein_coding	mmu02010	ABC transporters	GO:0000166,GO:0005524,GO:0005739,GO:0005783,GO:0016020,GO:0016887,GO:0042626,GO:0055085,GO:0140359	nucleotide binding|ATP binding|mitochondrion|endoplasmic reticulum|membrane|ATP hydrolysis activity|ATPase-coupled transmembrane transporter activity|transmembrane transport|ABC-type transporter activity
Abcc2	582.928	802.434	363.421	0.4529	-1.14273	0.200593	0.466728	Down	0.354061	1.87017	3.12625	3.21059	5.26669	1.91986	12780	ATP-binding cassette%2C sub-family C (CFTR/MRP)%2C member 2	protein_coding	mmu02010,mmu04976,mmu01524,mmu01523	ABC transporters|Bile secretion|Platinum drug resistance|Antifolate resistance	GO:0005515,GO:0005886,GO:0006855,GO:0008559,GO:0009410,GO:0009986,GO:0010629,GO:0015127,GO:0015431,GO:0015694,GO:0015711,GO:0015721,GO:0015722,GO:0015723,GO:0015732,GO:0016020,GO:0016324,GO:0016999,GO:0019904,GO:0030644,GO:0031526,GO:0042178,GO:0042626,GO:0042910,GO:0043627,GO:0046581,GO:0046618,GO:0046691,GO:0050787,GO:0055085,GO:0070327,GO:0070633,GO:0071716,GO:1901086,GO:1990961,GO:1990962	protein binding|plasma membrane|xenobiotic transmembrane transport|ABC-type xenobiotic transporter activity|response to xenobiotic stimulus|cell surface|negative regulation of gene expression|bilirubin transmembrane transporter activity|ABC-type glutathione S-conjugate transporter activity|mercury ion transport|organic anion transport|bile acid and bile salt transport|canalicular bile acid transp…	WP4466,WP431	Oxidative stress and redox pathway|Nuclear receptors in lipid metabolism and toxicity	R-MMU-1430728,R-MMU-189445,R-MMU-189483,R-MMU-382551,R-MMU-382556,R-MMU-9748784,R-MMU-9749641,R-MMU-9753281,R-MMU-9754706	Metabolism|Metabolism of porphyrins|Heme degradation|Transport of small molecules|ABC-family proteins mediated transport|Drug ADME|Aspirin ADME|Paracetamol ADME|Atorvastatin ADME
Abcc3	231.868	245.826	217.91	0.88675	-0.1734	0.52035	0.761107	Down	1.51429	1.2303	0.868055	1.37938	1.06819	1.18866	76408	ATP-binding cassette%2C sub-family C (CFTR/MRP)%2C member 3	protein_coding	mmu02010,mmu04976,mmu01523	ABC transporters|Bile secretion|Antifolate resistance	GO:0000166,GO:0005524,GO:0005886,GO:0006855,GO:0006869,GO:0008559,GO:0009925,GO:0015164,GO:0015431,GO:0015432,GO:0015721,GO:0015722,GO:0016020,GO:0016323,GO:0016887,GO:0022857,GO:0042626,GO:0042908,GO:0042910,GO:0055085,GO:0071714,GO:0071716,GO:0098656,GO:0140359	nucleotide binding|ATP binding|plasma membrane|xenobiotic transmembrane transport|lipid transport|ABC-type xenobiotic transporter activity|basal plasma membrane|glucuronoside transmembrane transporter activity|ABC-type glutathione S-conjugate transporter activity|ABC-type bile acid transporter activity|bile acid and bile salt transport|canalicular bile acid transport|membrane|basolateral plasma m…	WP431	Nuclear receptors in lipid metabolism and toxicity	R-MMU-1430728,R-MMU-159418,R-MMU-194068,R-MMU-382551,R-MMU-382556,R-MMU-556833,R-MMU-8957322,R-MMU-9748784,R-MMU-9749641,R-MMU-9753281	Metabolism|Recycling of bile acids and salts|Bile acid and bile salt metabolism|Transport of small molecules|ABC-family proteins mediated transport|Metabolism of lipids|Metabolism of steroids|Drug ADME|Aspirin ADME|Paracetamol ADME
Abcc4	519.383	477.942	560.825	1.17348	0.230788	0.498452	0.747505	Up	0.896371	1.81231	2.41637	1.03306	1.52131	1.35773	239273	ATP-binding cassette%2C sub-family C (CFTR/MRP)%2C member 4	protein_coding	mmu02010,mmu04024,mmu04976,mmu01523	ABC transporters|cAMP signaling pathway|Bile secretion|Antifolate resistance	GO:0000166,GO:0001409,GO:0005524,GO:0005730,GO:0005794,GO:0005886,GO:0005929,GO:0006855,GO:0006869,GO:0008559,GO:0015132,GO:0015143,GO:0015216,GO:0015431,GO:0015432,GO:0015562,GO:0015665,GO:0015721,GO:0015732,GO:0015747,GO:0015850,GO:0016020,GO:0016323,GO:0016324,GO:0016887,GO:0031088,GO:0032310,GO:0034634,GO:0042626,GO:0042910,GO:0048661,GO:0055085,GO:0060271,GO:0070730,GO:0071716,GO:0098591,GO:…	nucleotide binding|guanine nucleotide transmembrane transporter activity|ATP binding|nucleolus|Golgi apparatus|plasma membrane|cilium|xenobiotic transmembrane transport|lipid transport|ABC-type xenobiotic transporter activity|prostaglandin transmembrane transporter activity|urate transmembrane transporter activity|purine nucleotide transmembrane transporter activity|ABC-type glutathione S-conjuga…	WP3625	Tyrobp causal network in microglia	R-MMU-109582,R-MMU-114608,R-MMU-382551,R-MMU-382556,R-MMU-76002,R-MMU-76005,R-MMU-9748784,R-MMU-9748787,R-MMU-9753281	Hemostasis|Platelet degranulation |Transport of small molecules|ABC-family proteins mediated transport|Platelet activation, signaling and aggregation|Response to elevated platelet cytosolic Ca2+|Drug ADME|Azathioprine ADME|Paracetamol ADME
Abcc5	4305.41	3403.76	5207.06	1.52979	0.61333	0.00566418	0.0412786	Up	11.7345	10.144	18.0019	6.43139	8.32201	8.53503	27416	ATP-binding cassette%2C sub-family C (CFTR/MRP)%2C member 5	protein_coding	mmu02010,mmu01523	ABC transporters|Antifolate resistance	GO:0000166,GO:0005524,GO:0005768,GO:0005794,GO:0005886,GO:0008559,GO:0015216,GO:0015232,GO:0015562,GO:0015865,GO:0016020,GO:0016323,GO:0016324,GO:0016887,GO:0022884,GO:0030213,GO:0034634,GO:0034775,GO:0035351,GO:0042626,GO:0042908,GO:0042910,GO:0048471,GO:0055085,GO:0070730,GO:0070731,GO:0098838,GO:0140115,GO:0140359,GO:1901505	nucleotide binding|ATP binding|endosome|Golgi apparatus|plasma membrane|ABC-type xenobiotic transporter activity|purine nucleotide transmembrane transporter activity|heme transmembrane transporter activity|efflux transmembrane transporter activity|purine nucleotide transport|membrane|basolateral plasma membrane|apical plasma membrane|ATP hydrolysis activity|macromolecule transmembrane transporter…	WP4466,WP5240	Oxidative stress and redox pathway|Lac-Phe pathway	R-MMU-1430728,R-MMU-1630316,R-MMU-2142845,R-MMU-2142850,R-MMU-382551,R-MMU-382556,R-MMU-71387,R-MMU-9748784,R-MMU-9748787,R-MMU-9753281	Metabolism|Glycosaminoglycan metabolism|Hyaluronan metabolism|Hyaluronan biosynthesis and export|Transport of small molecules|ABC-family proteins mediated transport|Metabolism of carbohydrates|Drug ADME|Azathioprine ADME|Paracetamol ADME
Abcc6	165.223	105.695	224.75	2.12659	1.08854	0.346857	0.627761	Up	0.0624778	1.08295	2.27268	0.43378	0.623482	0.366593	27421	ATP-binding cassette%2C sub-family C (CFTR/MRP)%2C member 6	protein_coding	mmu02010	ABC transporters	GO:0000166,GO:0005524,GO:0005576,GO:0005654,GO:0005886,GO:0006855,GO:0008559,GO:0009925,GO:0010467,GO:0015431,GO:0015867,GO:0016020,GO:0016323,GO:0016324,GO:0016328,GO:0016887,GO:0030504,GO:0030505,GO:0030643,GO:0032026,GO:0042626,GO:0046034,GO:0055062,GO:0055074,GO:0055085,GO:0071716,GO:0140359,GO:0140928,GO:1904383	nucleotide binding|ATP binding|extracellular region|nucleoplasm|plasma membrane|xenobiotic transmembrane transport|ABC-type xenobiotic transporter activity|basal plasma membrane|gene expression|ABC-type glutathione S-conjugate transporter activity|ATP transport|membrane|basolateral plasma membrane|apical plasma membrane|lateral plasma membrane|ATP hydrolysis activity|inorganic diphosphate transme…			R-MMU-382551,R-MMU-382556	Transport of small molecules|ABC-family proteins mediated transport
Abcc8	147.404	197.082	97.7266	0.495942	-1.01176	0.0317925	0.144473	Down	0.204831	0.577062	0.759555	0.831384	1.22937	0.697819	20927	ATP-binding cassette%2C sub-family C (CFTR/MRP)%2C member 8	protein_coding	mmu02010,mmu04911,mmu04930	ABC transporters|Insulin secretion|Type II diabetes mellitus	GO:0001678,GO:0005267,GO:0005524,GO:0005886,GO:0007613,GO:0008270,GO:0008282,GO:0008542,GO:0009268,GO:0010043,GO:0010989,GO:0016020,GO:0016525,GO:0019829,GO:0030672,GO:0032760,GO:0032991,GO:0035774,GO:0042383,GO:0042626,GO:0043268,GO:0043531,GO:0044325,GO:0044877,GO:0046676,GO:0050768,GO:0050905,GO:0055085,GO:0060253,GO:0061535,GO:0061855,GO:0071310,GO:1900721,GO:1903818,GO:1905075,GO:1905604	intracellular glucose homeostasis|potassium channel activity|ATP binding|plasma membrane|memory|zinc ion binding|inward rectifying potassium channel|visual learning|response to pH|response to zinc ion|negative regulation of low-density lipoprotein particle clearance|membrane|negative regulation of angiogenesis|ATPase-coupled monoatomic cation transmembrane transporter activity|synaptic vesicle me…			R-MMU-112316,R-MMU-1296025,R-MMU-1296065,R-MMU-1296071,R-MMU-1430728,R-MMU-163685,R-MMU-422356	Neuronal System|ATP sensitive Potassium channels|Inwardly rectifying K+ channels|Potassium Channels|Metabolism|Integration of energy metabolism|Regulation of insulin secretion
Abcc9	159.384	246.67	72.0982	0.292274	-1.77461	8.84856e-07	2.69209e-05	Down	0.345945	0.228656	0.1711	0.770178	0.487237	1.04751	20928	ATP-binding cassette%2C sub-family C (CFTR/MRP)%2C member 9	protein_coding	mmu02010	ABC transporters	GO:0000166,GO:0001508,GO:0001568,GO:0001669,GO:0001816,GO:0003007,GO:0005261,GO:0005267,GO:0005524,GO:0005886,GO:0006813,GO:0008217,GO:0008281,GO:0008282,GO:0009410,GO:0015459,GO:0016020,GO:0016887,GO:0019829,GO:0019905,GO:0022857,GO:0030017,GO:0030315,GO:0033198,GO:0042626,GO:0042802,GO:0044325,GO:0045776,GO:0048144,GO:0051607,GO:0055085,GO:0060976,GO:0061337,GO:0071805,GO:0072359,GO:0086003,GO:…	nucleotide binding|action potential|blood vessel development|acrosomal vesicle|cytokine production|heart morphogenesis|monoatomic cation channel activity|potassium channel activity|ATP binding|plasma membrane|potassium ion transport|regulation of blood pressure|sulfonylurea receptor activity|inward rectifying potassium channel|response to xenobiotic stimulus|potassium channel regulator activity|m…			R-MMU-112316,R-MMU-1296025,R-MMU-1296065,R-MMU-1296071,R-MMU-382551,R-MMU-382556,R-MMU-397014,R-MMU-5576891,R-MMU-5578775	Neuronal System|ATP sensitive Potassium channels|Inwardly rectifying K+ channels|Potassium Channels|Transport of small molecules|ABC-family proteins mediated transport|Muscle contraction|Cardiac conduction|Ion homeostasis
Abcd1	2035.49	2173.08	1897.9	0.873433	-0.195231	0.16324	0.41529	Down	16.2418	13.9714	13.1069	15.528	13.8131	14.9398	11666	ATP-binding cassette%2C sub-family D (ALD)%2C member 1	protein_coding	mmu02010,mmu04146	ABC transporters|Peroxisome	GO:0000038,GO:0000166,GO:0002082,GO:0005324,GO:0005515,GO:0005524,GO:0005737,GO:0005739,GO:0005764,GO:0005765,GO:0005777,GO:0005778,GO:0005783,GO:0005789,GO:0006635,GO:0007031,GO:0015607,GO:0015910,GO:0016020,GO:0016787,GO:0016887,GO:0019899,GO:0030497,GO:0031966,GO:0031998,GO:0032000,GO:0036113,GO:0042626,GO:0042758,GO:0042760,GO:0042802,GO:0042803,GO:0043217,GO:0043531,GO:0046982,GO:0047617,GO:…	very long-chain fatty acid metabolic process|nucleotide binding|regulation of oxidative phosphorylation|long-chain fatty acid transporter activity|protein binding|ATP binding|cytoplasm|mitochondrion|lysosome|lysosomal membrane|peroxisome|peroxisomal membrane|endoplasmic reticulum|endoplasmic reticulum membrane|fatty acid beta-oxidation|peroxisome organization|ABC-type fatty-acyl-CoA transporter a…			R-MMU-1369062,R-MMU-1430728,R-MMU-2046104,R-MMU-2046105,R-MMU-2046106,R-MMU-382551,R-MMU-382556,R-MMU-390247,R-MMU-390918,R-MMU-556833,R-MMU-8978868,R-MMU-9603798,R-MMU-9609507	ABC transporters in lipid homeostasis|Metabolism|alpha-linolenic (omega3) and linoleic (omega6) acid metabolism|Linoleic acid (LA) metabolism|alpha-linolenic acid (ALA) metabolism|Transport of small molecules|ABC-family proteins mediated transport|Beta-oxidation of very long chain fatty acids|Peroxisomal lipid metabolism|Metabolism of lipids|Fatty acid metabolism|Class I peroxisomal membrane prot…
Abcd2	33.5479	43.334	23.7617	0.54722	-0.869808	0.0520187	0.202199	Down	0.0915841	0.0997165	0.153645	0.154992	0.179161	0.231351	26874	ATP-binding cassette%2C sub-family D (ALD)%2C member 2	protein_coding	mmu02010,mmu04146	ABC transporters|Peroxisome	GO:0000038,GO:0000166,GO:0005324,GO:0005515,GO:0005524,GO:0005739,GO:0005777,GO:0005778,GO:0006629,GO:0006635,GO:0007031,GO:0009617,GO:0015910,GO:0016020,GO:0016787,GO:0016887,GO:0032000,GO:0042626,GO:0042760,GO:0042803,GO:0043217,GO:0046982,GO:0047617,GO:0055085,GO:0140359,GO:1900016,GO:1903427,GO:1990535,GO:2001280	very long-chain fatty acid metabolic process|nucleotide binding|long-chain fatty acid transporter activity|protein binding|ATP binding|mitochondrion|peroxisome|peroxisomal membrane|lipid metabolic process|fatty acid beta-oxidation|peroxisome organization|response to bacterium|long-chain fatty acid import into peroxisome|membrane|hydrolase activity|ATP hydrolysis activity|positive regulation of fa…	WP431	Nuclear receptors in lipid metabolism and toxicity	R-MMU-1369062,R-MMU-382551,R-MMU-382556,R-MMU-9603798,R-MMU-9609507	ABC transporters in lipid homeostasis|Transport of small molecules|ABC-family proteins mediated transport|Class I peroxisomal membrane protein import|Protein localization
Abcd3	2379.2	2162.16	2596.25	1.20057	0.26372	0.0462794	0.186891	Up	11.9114	10.0509	10.83	7.46224	7.27716	9.79365	19299	ATP-binding cassette%2C sub-family D (ALD)%2C member 3	protein_coding	mmu02010,mmu04146	ABC transporters|Peroxisome	GO:0000038,GO:0000166,GO:0005324,GO:0005515,GO:0005524,GO:0005739,GO:0005743,GO:0005777,GO:0005778,GO:0005782,GO:0006633,GO:0006635,GO:0006699,GO:0006869,GO:0007031,GO:0015721,GO:0015910,GO:0016020,GO:0016787,GO:0016887,GO:0042626,GO:0042760,GO:0042803,GO:0043231,GO:0043621,GO:0047617,GO:0055085,GO:0140359,GO:1903512	very long-chain fatty acid metabolic process|nucleotide binding|long-chain fatty acid transporter activity|protein binding|ATP binding|mitochondrion|mitochondrial inner membrane|peroxisome|peroxisomal membrane|peroxisomal matrix|fatty acid biosynthetic process|fatty acid beta-oxidation|bile acid biosynthetic process|lipid transport|peroxisome organization|bile acid and bile salt transport|long-ch…	WP431	Nuclear receptors in lipid metabolism and toxicity	R-MMU-1369062,R-MMU-162582,R-MMU-194315,R-MMU-382551,R-MMU-382556,R-MMU-8980692,R-MMU-9012999,R-MMU-9013106,R-MMU-9603798,R-MMU-9609507,R-MMU-9716542	ABC transporters in lipid homeostasis|Signal Transduction|Signaling by Rho GTPases|Transport of small molecules|ABC-family proteins mediated transport|RHOA GTPase cycle|RHO GTPase cycle|RHOC GTPase cycle|Class I peroxisomal membrane protein import|Protein localization|Signaling by Rho GTPases, Miro GTPases and RHOBTB3
Abcd4	2057.86	1601.06	2514.66	1.57044	0.651167	9.49894e-07	2.82457e-05	Up	19.2268	20.1216	21.0269	12.3271	10.0699	11.9812	19300	ATP-binding cassette%2C sub-family D (ALD)%2C member 4	protein_coding	mmu02010,mmu04146	ABC transporters|Peroxisome	GO:0000166,GO:0005324,GO:0005524,GO:0005764,GO:0005765,GO:0005777,GO:0005778,GO:0005783,GO:0005789,GO:0006635,GO:0007031,GO:0009235,GO:0015420,GO:0015889,GO:0015910,GO:0016020,GO:0016887,GO:0042626,GO:0042760,GO:0042802,GO:0055085,GO:0140359,GO:1990830	nucleotide binding|long-chain fatty acid transporter activity|ATP binding|lysosome|lysosomal membrane|peroxisome|peroxisomal membrane|endoplasmic reticulum|endoplasmic reticulum membrane|fatty acid beta-oxidation|peroxisome organization|cobalamin metabolic process|ABC-type vitamin B12 transporter activity|cobalamin transport|long-chain fatty acid import into peroxisome|membrane|ATP hydrolysis act…			R-MMU-1430728,R-MMU-196741,R-MMU-196849,R-MMU-196854,R-MMU-9758881,R-MMU-9758890	Metabolism|Cobalamin (Cbl, vitamin B12) transport and metabolism|Metabolism of water-soluble vitamins and cofactors|Metabolism of vitamins and cofactors|Uptake of dietary cobalamins into enterocytes|Transport of RCbl within the body
Abce1	4321.98	4165.91	4478.05	1.07493	0.104242	0.403259	0.675826	Up	35.9473	31.5332	30.308	28.1817	24.7193	28.4227	24015	ATP-binding cassette%2C sub-family E (OABP)%2C member 1	protein_coding			GO:0000054,GO:0000166,GO:0003924,GO:0005506,GO:0005524,GO:0005737,GO:0005739,GO:0005829,GO:0006413,GO:0006415,GO:0006417,GO:0016787,GO:0016887,GO:0017111,GO:0022626,GO:0032790,GO:0043024,GO:0043273,GO:0046872,GO:0051536,GO:0051539,GO:0060698,GO:0060702,GO:0072344	ribosomal subunit export from nucleus|nucleotide binding|GTPase activity|iron ion binding|ATP binding|cytoplasm|mitochondrion|cytosol|translational initiation|translational termination|regulation of translation|hydrolase activity|ATP hydrolysis activity|ribonucleoside triphosphate phosphatase activity|cytosolic ribosome|ribosome disassembly|ribosomal small subunit binding|CTPase activity|metal io…			R-MMU-1169410,R-MMU-1280215,R-MMU-168256,R-MMU-8983711,R-MMU-909733,R-MMU-913531	Antiviral mechanism by IFN-stimulated genes|Cytokine Signaling in Immune system|Immune System|OAS antiviral response|Interferon alpha/beta signaling|Interferon Signaling
Abcf1	6122.13	6892.5	5351.76	0.776516	-0.364913	0.00761493	0.0515454	Down	52.8138	46.2485	42.3771	53.2029	56.1567	53.1293	224742	ATP-binding cassette%2C sub-family F (GCN20)%2C member 1	protein_coding			GO:0000166,GO:0005524,GO:0005634,GO:0005635,GO:0005654,GO:0005737,GO:0005829,GO:0005840,GO:0006413,GO:0008494,GO:0016887,GO:0042788,GO:0043022,GO:0045727	nucleotide binding|ATP binding|nucleus|nuclear envelope|nucleoplasm|cytoplasm|cytosol|ribosome|translational initiation|translation activator activity|ATP hydrolysis activity|polysomal ribosome|ribosome binding|positive regulation of translation			R-MMU-382551,R-MMU-382556	Transport of small molecules|ABC-family proteins mediated transport
Abcf2	1980.08	1904.23	2055.93	1.0797	0.110627	0.342383	0.624039	Up	19.4499	19.2069	17.4364	15.424	14.502	16.6018	27407	ATP-binding cassette%2C sub-family F (GCN20)%2C member 2	protein_coding			GO:0000166,GO:0005515,GO:0005524,GO:0005739,GO:0008150,GO:0016887	nucleotide binding|protein binding|ATP binding|mitochondrion|biological_process|ATP hydrolysis activity
Abcf3	1372.71	1281.28	1464.15	1.14293	0.192741	0.125703	0.356899	Up	12.6933	12.9492	11.3887	9.04645	9.65975	10.3241	27406	ATP-binding cassette%2C sub-family F (GCN20)%2C member 3	protein_coding			GO:0000166,GO:0005515,GO:0005524,GO:0016887,GO:0051607	nucleotide binding|protein binding|ATP binding|ATP hydrolysis activity|defense response to virus
Abcg1	3043.51	4594.69	1492.34	0.32484	-1.6222	2.60809e-18	7.95506e-16	Down	7.54932	7.05772	6.73137	18.371	23.365	16.6175	11307	ATP binding cassette subfamily G member 1	protein_coding	mmu02010,mmu05417	ABC transporters|Lipid and atherosclerosis	GO:0000166,GO:0005524,GO:0005739,GO:0005768,GO:0005783,GO:0005794,GO:0005886,GO:0006869,GO:0008203,GO:0009897,GO:0010745,GO:0010875,GO:0010888,GO:0016020,GO:0016887,GO:0019534,GO:0030301,GO:0032367,GO:0033344,GO:0033700,GO:0033993,GO:0034041,GO:0034374,GO:0034375,GO:0034436,GO:0035774,GO:0042632,GO:0042803,GO:0042987,GO:0043531,GO:0043691,GO:0045542,GO:0046982,GO:0050714,GO:0055037,GO:0055085,GO:…	nucleotide binding|ATP binding|mitochondrion|endosome|endoplasmic reticulum|Golgi apparatus|plasma membrane|lipid transport|cholesterol metabolic process|external side of plasma membrane|negative regulation of macrophage derived foam cell differentiation|positive regulation of cholesterol efflux|negative regulation of lipid storage|membrane|ATP hydrolysis activity|toxin transmembrane transporter …	WP431,WP4346	Nuclear receptors in lipid metabolism and toxicity|Cholesterol metabolism with Bloch and Kandutsch-Russell pathways	R-MMU-1369062,R-MMU-174824,R-MMU-382551,R-MMU-382556,R-MMU-8963899,R-MMU-8964058	ABC transporters in lipid homeostasis|Plasma lipoprotein assembly, remodeling, and clearance|Transport of small molecules|ABC-family proteins mediated transport|Plasma lipoprotein remodeling|HDL remodeling
Abcg2	3078.83	3476.16	2681.5	0.771441	-0.374373	0.0566059	0.214198	Down	16.3307	20.0254	23.9665	20.9354	26.9305	21.8261	26357	ATP binding cassette subfamily G member 2 (Junior blood group)	protein_coding	mmu02010,mmu04976,mmu01523	ABC transporters|Bile secretion|Antifolate resistance	GO:0000166,GO:0005524,GO:0005654,GO:0005739,GO:0005886,GO:0006869,GO:0008092,GO:0008514,GO:0008559,GO:0015143,GO:0015225,GO:0015562,GO:0015711,GO:0015747,GO:0015878,GO:0016020,GO:0016324,GO:0019389,GO:0031526,GO:0032217,GO:0032218,GO:0042626,GO:0042802,GO:0042803,GO:0042887,GO:0042910,GO:0045121,GO:0046415,GO:0055085,GO:0060136,GO:0065003,GO:0070633,GO:0097744,GO:0098591,GO:0140115,GO:0140359,GO:…	nucleotide binding|ATP binding|nucleoplasm|mitochondrion|plasma membrane|lipid transport|cytoskeletal protein binding|organic anion transmembrane transporter activity|ABC-type xenobiotic transporter activity|urate transmembrane transporter activity|biotin transmembrane transporter activity|efflux transmembrane transporter activity|organic anion transport|urate transport|biotin transport|membrane|…			R-MMU-1430728,R-MMU-189445,R-MMU-189451,R-MMU-189483,R-MMU-382551,R-MMU-917937,R-MMU-9748784,R-MMU-9753281,R-MMU-9793528	Metabolism|Metabolism of porphyrins|Heme biosynthesis|Heme degradation|Transport of small molecules|Iron uptake and transport|Drug ADME|Paracetamol ADME|Ciprofloxacin ADME
Abcg3	16.5424	14.8029	18.2818	1.23124	0.30011	0.734408	0.879772	Up	0.0276607	0.0982072	0.275527	0.130031	0.0569591	0.102755	27405	ATP binding cassette subfamily G member 3	protein_coding	mmu02010	ABC transporters	GO:0005524,GO:0005654,GO:0005886,GO:0008559,GO:0015143,GO:0015562,GO:0016020,GO:0031526,GO:0032217,GO:0032218,GO:0042626,GO:0042802,GO:0042803,GO:0045121,GO:0046415,GO:0055085,GO:0070633,GO:0097744,GO:0140359,GO:1990748,GO:1990962	ATP binding|nucleoplasm|plasma membrane|ABC-type xenobiotic transporter activity|urate transmembrane transporter activity|efflux transmembrane transporter activity|membrane|brush border membrane|riboflavin transmembrane transporter activity|riboflavin transport|ATPase-coupled transmembrane transporter activity|identical protein binding|protein homodimerization activity|membrane raft|urate metabol…
Abcg4	16.0831	13.3047	18.8615	1.42002	0.505908	0.452492	0.714899	Up	0.0968989	0.105503	0.0863607	0.0956586	0.0498838	0.0335968	192663	ATP binding cassette subfamily G member 4	protein_coding	mmu02010	ABC transporters	GO:0000166,GO:0005524,GO:0005768,GO:0005886,GO:0006355,GO:0010008,GO:0010875,GO:0015918,GO:0016020,GO:0016887,GO:0031410,GO:0033344,GO:0034041,GO:0042632,GO:0042802,GO:0042803,GO:0045542,GO:0046982,GO:0055085,GO:0071403,GO:0140359,GO:1990830	nucleotide binding|ATP binding|endosome|plasma membrane|regulation of DNA-templated transcription|endosome membrane|positive regulation of cholesterol efflux|sterol transport|membrane|ATP hydrolysis activity|cytoplasmic vesicle|cholesterol efflux|ABC-type sterol transporter activity|cholesterol homeostasis|identical protein binding|protein homodimerization activity|positive regulation of choleste…			R-MMU-1369062,R-MMU-382551,R-MMU-382556	ABC transporters in lipid homeostasis|Transport of small molecules|ABC-family proteins mediated transport
Abcg5	7.70301	3.10137	12.3046	3.95467	1.98356	0.0987527	0.307398	Up	0.0218153	0.227198	0.171554	0.0615316	0.0112306	0.0216109	27409	ATP binding cassette subfamily G member 5	protein_coding	mmu02010,mmu04976,mmu04975,mmu04979	ABC transporters|Bile secretion|Fat digestion and absorption|Cholesterol metabolism	GO:0000166,GO:0005515,GO:0005524,GO:0005886,GO:0006869,GO:0010949,GO:0015918,GO:0016020,GO:0016324,GO:0016887,GO:0030299,GO:0033344,GO:0042626,GO:0042632,GO:0043190,GO:0043235,GO:0045177,GO:0045796,GO:0046872,GO:0046982,GO:0055085,GO:0120020,GO:0140359	nucleotide binding|protein binding|ATP binding|plasma membrane|lipid transport|negative regulation of intestinal phytosterol absorption|sterol transport|membrane|apical plasma membrane|ATP hydrolysis activity|intestinal cholesterol absorption|cholesterol efflux|ATPase-coupled transmembrane transporter activity|cholesterol homeostasis|ATP-binding cassette (ABC) transporter complex|receptor complex…	WP1259,WP431	Retinol metabolism|Nuclear receptors in lipid metabolism and toxicity	R-MMU-1369062,R-MMU-382551,R-MMU-382556	ABC transporters in lipid homeostasis|Transport of small molecules|ABC-family proteins mediated transport
Abcg8	2.2209	0.995298	3.4465	3.41463	1.77173	0.390584	0.665147	Up	0	0.0531316	0.0220655	0.00659522	0	0.0138981	67470	ATP binding cassette subfamily G member 8	protein_coding	mmu02010,mmu04976,mmu04975,mmu04979	ABC transporters|Bile secretion|Fat digestion and absorption|Cholesterol metabolism	GO:0005515,GO:0005524,GO:0005886,GO:0006869,GO:0010949,GO:0015914,GO:0015918,GO:0016020,GO:0016324,GO:0016887,GO:0030299,GO:0033344,GO:0042626,GO:0042632,GO:0043190,GO:0043235,GO:0045796,GO:0046872,GO:0046982,GO:0055085,GO:0055092,GO:0120020,GO:0140359	protein binding|ATP binding|plasma membrane|lipid transport|negative regulation of intestinal phytosterol absorption|phospholipid transport|sterol transport|membrane|apical plasma membrane|ATP hydrolysis activity|intestinal cholesterol absorption|cholesterol efflux|ATPase-coupled transmembrane transporter activity|cholesterol homeostasis|ATP-binding cassette (ABC) transporter complex|receptor com…	WP1259	Retinol metabolism	R-MMU-1369062,R-MMU-382551,R-MMU-382556	ABC transporters in lipid homeostasis|Transport of small molecules|ABC-family proteins mediated transport
Abhd10	313.79	288.215	339.365	1.17732	0.235506	0.258043	0.537026	Up	1.16097	1.44082	1.608	1.15422	0.985351	1.05296	213012	abhydrolase domain containing 10	protein_coding			GO:0002084,GO:0004553,GO:0005739,GO:0005829,GO:0008474,GO:0016787,GO:0019391,GO:0102390	protein depalmitoylation|hydrolase activity, hydrolyzing O-glycosyl compounds|mitochondrion|cytosol|palmitoyl-(protein) hydrolase activity|hydrolase activity|glucuronoside catabolic process|mycophenolic acid acyl-glucuronide esterase activity			R-MMU-1430728,R-MMU-156580,R-MMU-156588,R-MMU-211859	Metabolism|Phase II - Conjugation of compounds|Glucuronidation|Biological oxidations
Abhd11	638.207	674.178	602.236	0.892851	-0.163508	0.262694	0.54286	Down	10.357	10.2669	10.3149	9.85966	8.95879	12.3184	68758	abhydrolase domain containing 11	protein_coding			GO:0003824,GO:0005739,GO:0016787,GO:0044255,GO:0052689	catalytic activity|mitochondrion|hydrolase activity|cellular lipid metabolic process|carboxylic ester hydrolase activity
Abhd11os	73.8562	74.2067	73.5057	0.99056	-0.0136842	0.970435	0.988982	Down	2.62984	4.92996	4.63251	4.10443	3.4117	3.49095	69812	abhydrolase domain containing 11%2C opposite strand	non_coding			GO:0003674,GO:0005575,GO:0008150	molecular_function|cellular_component|biological_process
Abhd12	2646.97	2790.71	2503.22	0.896968	-0.156871	0.297144	0.577729	Down	25.3351	31.1108	28.2029	24.2726	27.65	33.0076	76192	abhydrolase domain containing 12	protein_coding			GO:0002084,GO:0004620,GO:0004622,GO:0005737,GO:0005739,GO:0005783,GO:0005789,GO:0006629,GO:0006660,GO:0007628,GO:0008474,GO:0009395,GO:0010996,GO:0016020,GO:0016787,GO:0032281,GO:0032839,GO:0046464,GO:0046475,GO:0047372,GO:0050727,GO:0052651	protein depalmitoylation|phospholipase activity|lysophospholipase activity|cytoplasm|mitochondrion|endoplasmic reticulum|endoplasmic reticulum membrane|lipid metabolic process|phosphatidylserine catabolic process|adult walking behavior|palmitoyl-(protein) hydrolase activity|phospholipid catabolic process|response to auditory stimulus|membrane|hydrolase activity|AMPA glutamate receptor complex|den…			R-MMU-109582,R-MMU-114508,R-MMU-162582,R-MMU-372790,R-MMU-388396,R-MMU-416476,R-MMU-426048,R-MMU-76002	Hemostasis|Effects of PIP2 hydrolysis|Signal Transduction|Signaling by GPCR|GPCR downstream signalling|G alpha (q) signalling events|Arachidonate production from DAG|Platelet activation, signaling and aggregation
Abhd12b	53.4105	49.9738	56.8473	1.13742	0.185769	0.711839	0.869974	Up	0.612593	0.51464	0.425197	0.673298	0.248738	0.282058	100504285	abhydrolase domain containing 12B	protein_coding			GO:0004622,GO:0005789,GO:0006660,GO:0047372,GO:0052651	lysophospholipase activity|endoplasmic reticulum membrane|phosphatidylserine catabolic process|acylglycerol lipase activity|monoacylglycerol catabolic process
Abhd13	1629.22	1696.41	1562.03	0.920965	-0.118781	0.320518	0.601505	Down	9.0453	7.95358	8.11108	8.03184	8.15287	8.15096	68904	abhydrolase domain containing 13	protein_coding			GO:0002084,GO:0005737,GO:0008474,GO:0016020,GO:0016787,GO:0032839	protein depalmitoylation|cytoplasm|palmitoyl-(protein) hydrolase activity|membrane|hydrolase activity|dendrite cytoplasm
Abhd14a	239.865	185.785	293.945	1.57994	0.65987	0.00804549	0.053755	Up	4.13048	4.68435	5.00079	2.13729	2.11108	3.66493	68644	abhydrolase domain containing 14A	protein_coding			GO:0005737,GO:0016020,GO:0016787	cytoplasm|membrane|hydrolase activity
Abhd14b	724.368	601.777	846.96	1.40752	0.493158	0.528286	0.766592	Up	2.80955	13.5517	17.4364	6.17542	10.333	4.76406	76491	abhydrolase domain containing 14b	protein_coding			GO:0005634,GO:0005654,GO:0005730,GO:0005737,GO:0005829,GO:0016740,GO:0016746,GO:0016787,GO:0045944	nucleus|nucleoplasm|nucleolus|cytoplasm|cytosol|transferase activity|acyltransferase activity|hydrolase activity|positive regulation of transcription by RNA polymerase II
Abhd15	197.643	178.367	216.919	1.21585	0.281968	0.264865	0.545306	Up	1.99929	2.04616	1.50221	1.5677	1.08341	1.4353	67477	abhydrolase domain containing 15	protein_coding			GO:0005515,GO:0005576,GO:0016042,GO:0034338,GO:0044255,GO:0047372,GO:0060612	protein binding|extracellular region|lipid catabolic process|short-chain carboxylesterase activity|cellular lipid metabolic process|acylglycerol lipase activity|adipose tissue development
Abhd16a	2497.48	2283.66	2711.31	1.18723	0.247597	0.0237513	0.118	Up	36.2197	35.4476	33.0126	25.0467	24.6771	29.3522	193742	abhydrolase domain containing 16A	protein_coding	mmu00561	Glycerolipid metabolism	GO:0004620,GO:0006629,GO:0006660,GO:0016020,GO:0016787,GO:0047372,GO:0052651,GO:1905344	phospholipase activity|lipid metabolic process|phosphatidylserine catabolic process|membrane|hydrolase activity|acylglycerol lipase activity|monoacylglycerol catabolic process|prostaglandin catabolic process
Abhd17a	2511.15	2425.1	2597.2	1.07082	0.0987217	0.35398	0.632981	Up	15.6901	15.5563	15.5793	12.6038	11.8315	14.7925	216169	abhydrolase domain containing 17A	protein_coding			GO:0002084,GO:0005768,GO:0005886,GO:0008474,GO:0010008,GO:0014069,GO:0016020,GO:0016607,GO:0016787,GO:0042995,GO:0043231,GO:0045202,GO:0045211,GO:0055038,GO:0072657,GO:0098839,GO:0098944,GO:0098978,GO:0099175,GO:1902817,GO:1905668	protein depalmitoylation|endosome|plasma membrane|palmitoyl-(protein) hydrolase activity|endosome membrane|postsynaptic density|membrane|nuclear speck|hydrolase activity|cell projection|intracellular membrane-bounded organelle|synapse|postsynaptic membrane|recycling endosome membrane|protein localization to membrane|postsynaptic density membrane|postsynaptic recycling endosome membrane|glutamater…			R-MMU-162582,R-MMU-5673001,R-MMU-5683057,R-MMU-5684996,R-MMU-9648002	Signal Transduction|RAF/MAP kinase cascade|MAPK family signaling cascades|MAPK1/MAPK3 signaling|RAS processing
Abhd17b	814.612	923.847	705.376	0.763644	-0.389028	0.00818242	0.0545793	Down	7.39671	6.44354	7.46579	7.10667	8.88171	8.97039	226016	abhydrolase domain containing 17B	protein_coding			GO:0002084,GO:0005768,GO:0005886,GO:0006508,GO:0008236,GO:0008474,GO:0010008,GO:0014069,GO:0016020,GO:0016787,GO:0042995,GO:0045202,GO:0045211,GO:0055038,GO:0098839,GO:0098944,GO:0098978,GO:0099175,GO:1902473,GO:1902817,GO:1902950,GO:1905668	protein depalmitoylation|endosome|plasma membrane|proteolysis|serine-type peptidase activity|palmitoyl-(protein) hydrolase activity|endosome membrane|postsynaptic density|membrane|hydrolase activity|cell projection|synapse|postsynaptic membrane|recycling endosome membrane|postsynaptic density membrane|postsynaptic recycling endosome membrane|glutamatergic synapse|regulation of postsynapse organiz…			R-MMU-162582,R-MMU-5673001,R-MMU-5683057,R-MMU-5684996,R-MMU-9648002	Signal Transduction|RAF/MAP kinase cascade|MAPK family signaling cascades|MAPK1/MAPK3 signaling|RAS processing
Abhd17c	2030.09	2437.37	1622.81	0.665838	-0.586756	0.0496891	0.195713	Down	11.8213	23.0742	25.2951	25.068	33.0053	22.3851	70178	abhydrolase domain containing 17C	protein_coding			GO:0002084,GO:0005768,GO:0005886,GO:0008474,GO:0010008,GO:0014069,GO:0016020,GO:0016787,GO:0042995,GO:0045202,GO:0045211,GO:0098978,GO:0099175,GO:1902817,GO:1905668	protein depalmitoylation|endosome|plasma membrane|palmitoyl-(protein) hydrolase activity|endosome membrane|postsynaptic density|membrane|hydrolase activity|cell projection|synapse|postsynaptic membrane|glutamatergic synapse|regulation of postsynapse organization|negative regulation of protein localization to microtubule|positive regulation of protein localization to endosome			R-MMU-162582,R-MMU-5673001,R-MMU-5683057,R-MMU-5684996,R-MMU-9648002	Signal Transduction|RAF/MAP kinase cascade|MAPK family signaling cascades|MAPK1/MAPK3 signaling|RAS processing
Abhd18	634.766	765.846	503.686	0.65787	-0.604125	0.000127222	0.0019716	Down	2.83459	2.79838	3.14527	3.45163	4.37493	4.10026	269423	abhydrolase domain containing 18	protein_coding			GO:0003674,GO:0005575,GO:0005576,GO:0008150	molecular_function|cellular_component|extracellular region|biological_process
Abhd2	13379.8	15040.6	11719.1	0.779175	-0.359981	0.005613	0.0410146	Down	52.3702	45.9557	41.7001	54.8773	50.5045	55.2149	54608	abhydrolase domain containing 2	protein_coding			GO:0001669,GO:0003707,GO:0005886,GO:0006629,GO:0007340,GO:0008126,GO:0009611,GO:0014909,GO:0014912,GO:0016020,GO:0016042,GO:0016787,GO:0031410,GO:0032570,GO:0033878,GO:0036126,GO:0042562,GO:0043401,GO:0046464,GO:0047372,GO:0048240,GO:0051792,GO:0051793,GO:0052689,GO:0097524	acrosomal vesicle|nuclear steroid receptor activity|plasma membrane|lipid metabolic process|acrosome reaction|acetylesterase activity|response to wounding|smooth muscle cell migration|negative regulation of smooth muscle cell migration|membrane|lipid catabolic process|hydrolase activity|cytoplasmic vesicle|response to progesterone|hormone-sensitive lipase activity|sperm flagellum|hormone binding|…
Abhd3	815.364	642.442	988.287	1.53788	0.620943	9.41239e-06	0.000210068	Up	7.25495	6.5672	6.95277	3.49476	3.82713	4.81322	106861	abhydrolase domain containing 3	protein_coding			GO:0004623,GO:0005575,GO:0006629,GO:0008126,GO:0008970,GO:0016020,GO:0016787,GO:0046470,GO:0047372,GO:0051792,GO:0051793,GO:0052689,GO:0052739,GO:0052740	phospholipase A2 activity|cellular_component|lipid metabolic process|acetylesterase activity|phospholipase A1 activity|membrane|hydrolase activity|phosphatidylcholine metabolic process|acylglycerol lipase activity|medium-chain fatty acid biosynthetic process|medium-chain fatty acid catabolic process|carboxylic ester hydrolase activity|phosphatidylserine 1-acylhydrolase activity|1-acyl-2-lysophosp…			R-MMU-1430728,R-MMU-1483191,R-MMU-1483206,R-MMU-1483257,R-MMU-556833	Metabolism|Synthesis of PC|Glycerophospholipid biosynthesis|Phospholipid metabolism|Metabolism of lipids
Abhd4	2551.49	3050.13	2052.85	0.673095	-0.571118	0.00011093	0.00176109	Down	19.0155	20.1407	21.1849	22.3062	29.6307	28.3157	105501	abhydrolase domain containing 4	protein_coding			GO:0004622,GO:0005739,GO:0005811,GO:0006629,GO:0006654,GO:0016042,GO:0016787,GO:0042171,GO:0055088,GO:0070291,GO:0070292	lysophospholipase activity|mitochondrion|lipid droplet|lipid metabolic process|phosphatidic acid biosynthetic process|lipid catabolic process|hydrolase activity|lysophosphatidic acid acyltransferase activity|lipid homeostasis|N-acylethanolamine metabolic process|N-acylphosphatidylethanolamine metabolic process			R-MMU-1430728,R-MMU-1482839,R-MMU-1483206,R-MMU-1483257,R-MMU-556833	Metabolism|Acyl chain remodelling of PE|Glycerophospholipid biosynthesis|Phospholipid metabolism|Metabolism of lipids
Abhd5	3953	4793	3112.99	0.649501	-0.622597	4.43818e-05	0.00080202	Down	25.2546	23.2406	20.5082	26.2469	31.4623	37.8426	67469	abhydrolase domain containing 5	protein_coding	mmu04923	Regulation of lipolysis in adipocytes	GO:0003841,GO:0004806,GO:0005515,GO:0005654,GO:0005737,GO:0005739,GO:0005811,GO:0005829,GO:0006629,GO:0006631,GO:0006654,GO:0008654,GO:0010891,GO:0010898,GO:0016740,GO:0016746,GO:0030154,GO:0042171,GO:0043231,GO:0050996,GO:0052689,GO:0055088,GO:0060229	1-acylglycerol-3-phosphate O-acyltransferase activity|triglyceride lipase activity|protein binding|nucleoplasm|cytoplasm|mitochondrion|lipid droplet|cytosol|lipid metabolic process|fatty acid metabolic process|phosphatidic acid biosynthetic process|phospholipid biosynthetic process|negative regulation of sequestering of triglyceride|positive regulation of triglyceride catabolic process|transferas…
Abhd6	4458.64	5010.09	3907.18	0.779859	-0.358715	0.0338192	0.15089	Down	9.40559	6.98732	6.46818	8.36045	7.86093	10.0601	66082	abhydrolase domain containing 6	protein_coding	mmu04723	Retrograde endocannabinoid signaling	GO:0003824,GO:0004620,GO:0005739,GO:0005764,GO:0005765,GO:0005768,GO:0006629,GO:0009395,GO:0016020,GO:0016787,GO:0030336,GO:0031902,GO:0032281,GO:0045211,GO:0046464,GO:0046889,GO:0047372,GO:0052651,GO:0060292,GO:0098978,GO:0098982,GO:0099178,GO:0120163,GO:2000124,GO:2001311	catalytic activity|phospholipase activity|mitochondrion|lysosome|lysosomal membrane|endosome|lipid metabolic process|phospholipid catabolic process|membrane|hydrolase activity|negative regulation of cell migration|late endosome membrane|AMPA glutamate receptor complex|postsynaptic membrane|acylglycerol catabolic process|positive regulation of lipid biosynthetic process|acylglycerol lipase activit…			R-MMU-109582,R-MMU-114508,R-MMU-162582,R-MMU-372790,R-MMU-388396,R-MMU-416476,R-MMU-426048,R-MMU-76002	Hemostasis|Effects of PIP2 hydrolysis|Signal Transduction|Signaling by GPCR|GPCR downstream signalling|G alpha (q) signalling events|Arachidonate production from DAG|Platelet activation, signaling and aggregation
Abhd8	368.576	386.382	350.771	0.908301	-0.138757	0.567396	0.790302	Down	3.31431	4.44378	3.63702	2.75803	4.44041	4.07858	64296	abhydrolase domain containing 8	protein_coding			GO:0003824,GO:0016787	catalytic activity|hydrolase activity
Abi1	4282.22	4716.58	3847.86	0.81577	-0.293766	0.00187084	0.017428	Down	28.7143	27.5629	30.3014	30.8784	29.74	34.3792	11308	abl interactor 1	protein_coding	mmu05132	Salmonella infection	GO:0001756,GO:0005515,GO:0005622,GO:0005634,GO:0005737,GO:0005856,GO:0014069,GO:0017124,GO:0030027,GO:0030296,GO:0031209,GO:0031252,GO:0032433,GO:0035591,GO:0035855,GO:0042995,GO:0043005,GO:0045202,GO:0048813,GO:0061098,GO:0072673,GO:0098978,GO:0099527	somitogenesis|protein binding|intracellular anatomical structure|nucleus|cytoplasm|cytoskeleton|postsynaptic density|SH3 domain binding|lamellipodium|protein tyrosine kinase activator activity|SCAR complex|cell leading edge|filopodium tip|signaling adaptor activity|megakaryocyte development|cell projection|neuron projection|synapse|dendrite morphogenesis|positive regulation of protein tyrosine ki…	WP572,WP88	EGFR1 signaling pathway|Toll-like receptor signaling	R-MMU-162582,R-MMU-168249,R-MMU-168256,R-MMU-194138,R-MMU-194315,R-MMU-195258,R-MMU-2029480,R-MMU-2029482,R-MMU-4420097,R-MMU-5663213,R-MMU-9006934,R-MMU-9012999,R-MMU-9013149,R-MMU-9013404,R-MMU-9013423,R-MMU-9716542	Signal Transduction|Innate Immune System|Immune System|Signaling by VEGF|Signaling by Rho GTPases|RHO GTPase Effectors|Fcgamma receptor (FCGR) dependent phagocytosis|Regulation of actin dynamics for phagocytic cup formation|VEGFA-VEGFR2 Pathway|RHO GTPases Activate WASPs and WAVEs|Signaling by Receptor Tyrosine Kinases|RHO GTPase cycle|RAC1 GTPase cycle|RAC2 GTPase cycle|RAC3 GTPase cycle|Signali…
Abi2	1346.49	1094.23	1598.75	1.46055	0.546512	0.000526419	0.0062967	Up	4.09698	4.06986	4.27773	2.20111	2.21801	3.26197	329165	abl interactor 2	protein_coding	mmu04810	Regulation of actin cytoskeleton	GO:0001764,GO:0005737,GO:0005829,GO:0005856,GO:0005884,GO:0005912,GO:0007399,GO:0007611,GO:0010592,GO:0016358,GO:0016477,GO:0016601,GO:0017124,GO:0030027,GO:0030425,GO:0031209,GO:0031267,GO:0031625,GO:0032433,GO:0035591,GO:0042802,GO:0042995,GO:0043010,GO:0043197,GO:0045186,GO:0045202,GO:0061001,GO:0061098,GO:0070064,GO:0070161,GO:0070309,GO:0098871,GO:0098974,GO:0098978,GO:0099173,GO:2000601	neuron migration|cytoplasm|cytosol|cytoskeleton|actin filament|adherens junction|nervous system development|learning or memory|positive regulation of lamellipodium assembly|dendrite development|cell migration|Rac protein signal transduction|SH3 domain binding|lamellipodium|dendrite|SCAR complex|small GTPase binding|ubiquitin protein ligase binding|filopodium tip|signaling adaptor activity|identic…	WP523	Regulation of actin cytoskeleton	R-MMU-162582,R-MMU-168249,R-MMU-168256,R-MMU-194138,R-MMU-194315,R-MMU-195258,R-MMU-2029480,R-MMU-2029482,R-MMU-4420097,R-MMU-5663213,R-MMU-9006934,R-MMU-9012999,R-MMU-9013149,R-MMU-9013404,R-MMU-9013423,R-MMU-9716542	Signal Transduction|Innate Immune System|Immune System|Signaling by VEGF|Signaling by Rho GTPases|RHO GTPase Effectors|Fcgamma receptor (FCGR) dependent phagocytosis|Regulation of actin dynamics for phagocytic cup formation|VEGFA-VEGFR2 Pathway|RHO GTPases Activate WASPs and WAVEs|Signaling by Receptor Tyrosine Kinases|RHO GTPase cycle|RAC1 GTPase cycle|RAC2 GTPase cycle|RAC3 GTPase cycle|Signali…
Abi3	268.459	233.771	303.148	1.29521	0.37319	0.208496	0.476769	Up	1.12003	0.83821	0.897136	0.603333	0.416004	0.977093	66610	ABI family member 3	protein_coding			GO:0002357,GO:0005515,GO:0005622,GO:0005737,GO:0010593,GO:0017124,GO:0018108,GO:0030027,GO:0030334,GO:0031209,GO:0042802,GO:0061098,GO:1903077,GO:2000774	defense response to tumor cell|protein binding|intracellular anatomical structure|cytoplasm|negative regulation of lamellipodium assembly|SH3 domain binding|peptidyl-tyrosine phosphorylation|lamellipodium|regulation of cell migration|SCAR complex|identical protein binding|positive regulation of protein tyrosine kinase activity|negative regulation of protein localization to plasma membrane|positiv…
Abi3bp	162.324	147.256	177.392	1.20469	0.26866	0.788108	0.906226	Up	0.100487	0.903825	1.33899	0.834548	0.581976	0.294489	320712	ABI family member 3 binding protein	protein_coding			GO:0005201,GO:0005518,GO:0005539,GO:0005614,GO:0008201,GO:0008285,GO:0010811,GO:0014069,GO:0030027,GO:0030036,GO:0030198,GO:0031012,GO:0043197,GO:0043198,GO:0051015,GO:0061001,GO:0062023,GO:0099151,GO:1904597,GO:1905209	extracellular matrix structural constituent|collagen binding|glycosaminoglycan binding|interstitial matrix|heparin binding|negative regulation of cell population proliferation|positive regulation of cell-substrate adhesion|postsynaptic density|lamellipodium|actin cytoskeleton organization|extracellular matrix organization|extracellular matrix|dendritic spine|dendritic shaft|actin filament binding…
Abitram	552.934	471.63	634.239	1.34486	0.427454	0.00591422	0.0425667	Up	4.20909	3.73936	3.37803	2.52506	2.32951	2.68288	230234	actin binding transcription modulator	protein_coding			GO:0003779,GO:0003785,GO:0005634,GO:0016607,GO:0030027,GO:0030425,GO:0030426,GO:0030833,GO:0032433,GO:0042995,GO:0048813,GO:0051015,GO:0051489	actin binding|actin monomer binding|nucleus|nuclear speck|lamellipodium|dendrite|growth cone|regulation of actin filament polymerization|filopodium tip|cell projection|dendrite morphogenesis|actin filament binding|regulation of filopodium assembly
Abl1	3229.34	3074.4	3384.29	1.10074	0.138478	0.229743	0.502794	Up	11.7896	9.81956	10.6102	8.771	7.98419	9.42011	11350	c-abl oncogene 1%2C non-receptor tyrosine kinase	protein_coding	mmu04012,mmu04014,mmu04110,mmu04722,mmu04360,mmu05200,mmu05206,mmu05208,mmu05220,mmu05416	ErbB signaling pathway|Ras signaling pathway|Cell cycle|Neurotrophin signaling pathway|Axon guidance|Pathways in cancer|MicroRNAs in cancer|Chemical carcinogenesis - reactive oxygen species|Chronic myeloid leukemia|Viral myocarditis	GO:0000166,GO:0000287,GO:0000400,GO:0000405,GO:0001726,GO:0001784,GO:0001843,GO:0001922,GO:0001934,GO:0002322,GO:0002333,GO:0003677,GO:0004672,GO:0004713,GO:0004715,GO:0005080,GO:0005515,GO:0005524,GO:0005634,GO:0005654,GO:0005730,GO:0005737,GO:0005739,GO:0005829,GO:0005856,GO:0006281,GO:0006468,GO:0006897,GO:0006909,GO:0006914,GO:0006915,GO:0006974,GO:0006979,GO:0007155,GO:0007173,GO:0007204,GO:…	nucleotide binding|magnesium ion binding|four-way junction DNA binding|bubble DNA binding|ruffle|phosphotyrosine residue binding|neural tube closure|B-1 B cell homeostasis|positive regulation of protein phosphorylation|B cell proliferation involved in immune response|transitional one stage B cell differentiation|DNA binding|protein kinase activity|protein tyrosine kinase activity|non-membrane spa…	WP488,WP407,WP1261	Alpha 6 beta 4 integrin signaling pathway|Kit receptor signaling pathway|ErbB signaling pathway	R-MMU-1266738,R-MMU-162582,R-MMU-1640170,R-MMU-168249,R-MMU-168256,R-MMU-194315,R-MMU-195258,R-MMU-2029480,R-MMU-2029482,R-MMU-212436,R-MMU-376176,R-MMU-422475,R-MMU-428890,R-MMU-453279,R-MMU-525793,R-MMU-5663213,R-MMU-5685938,R-MMU-5693532,R-MMU-5693538,R-MMU-5693565,R-MMU-5693567,R-MMU-5693606,R-MMU-69231,R-MMU-69236,R-MMU-69278,R-MMU-73857,R-MMU-73894,R-MMU-74160,R-MMU-8878171,R-MMU-8939236,R-…	Developmental Biology|Signal Transduction|Cell Cycle|Innate Immune System|Immune System|Signaling by Rho GTPases|RHO GTPase Effectors|Fcgamma receptor (FCGR) dependent phagocytosis|Regulation of actin dynamics for phagocytic cup formation|Generic Transcription Pathway|Signaling by ROBO receptors|Axon guidance|Role of ABL in ROBO-SLIT signaling|Mitotic G1 phase and G1/S transition|Myogenesis|RHO G…
Abl2	2392.63	2471.41	2313.84	0.936415	-0.0947794	0.599515	0.80935	Down	5.44201	4.60224	4.64091	4.76236	5.22972	3.92218	11352	v-abl Abelson murine leukemia viral oncogene 2 (arg%2C Abelson-related gene)	protein_coding	mmu04012,mmu04014,mmu05208,mmu05416	ErbB signaling pathway|Ras signaling pathway|Chemical carcinogenesis - reactive oxygen species|Viral myocarditis	GO:0000166,GO:0000287,GO:0001784,GO:0001843,GO:0001891,GO:0002118,GO:0004672,GO:0004713,GO:0004715,GO:0005515,GO:0005524,GO:0005737,GO:0005856,GO:0006468,GO:0006909,GO:0006930,GO:0007015,GO:0007155,GO:0007173,GO:0007204,GO:0007249,GO:0007266,GO:0007612,GO:0007628,GO:0008104,GO:0008542,GO:0009791,GO:0010863,GO:0010976,GO:0015629,GO:0016301,GO:0016310,GO:0016322,GO:0016740,GO:0018108,GO:0021587,GO:…	nucleotide binding|magnesium ion binding|phosphotyrosine residue binding|neural tube closure|phagocytic cup|aggressive behavior|protein kinase activity|protein tyrosine kinase activity|non-membrane spanning protein tyrosine kinase activity|protein binding|ATP binding|cytoplasm|cytoskeleton|protein phosphorylation|phagocytosis|substrate-dependent cell migration, cell extension|actin filament organ…
Ablim1	2598.23	3026.75	2169.72	0.71683	-0.480296	0.0069376	0.0481423	Down	4.64758	5.70667	6.99829	7.27317	7.17125	7.16515	226251	actin-binding LIM protein 1	protein_coding	mmu04360	Axon guidance	GO:0001725,GO:0003779,GO:0005515,GO:0005737,GO:0005856,GO:0006366,GO:0007010,GO:0007411,GO:0014069,GO:0015629,GO:0030027,GO:0030032,GO:0045944,GO:0046872,GO:0051015,GO:0060271	stress fiber|actin binding|protein binding|cytoplasm|cytoskeleton|transcription by RNA polymerase II|cytoskeleton organization|axon guidance|postsynaptic density|actin cytoskeleton|lamellipodium|lamellipodium assembly|positive regulation of transcription by RNA polymerase II|metal ion binding|actin filament binding|cilium assembly
Ablim2	172.839	169.224	176.454	1.04154	0.0587177	0.827257	0.925642	Up	1.22466	1.03859	0.979803	0.758517	0.746992	1.31093	231148	actin-binding LIM protein 2	protein_coding	mmu04360	Axon guidance	GO:0003779,GO:0005737,GO:0006366,GO:0007010,GO:0015629,GO:0030016,GO:0030032,GO:0045944,GO:0046872,GO:0051015	actin binding|cytoplasm|transcription by RNA polymerase II|cytoskeleton organization|actin cytoskeleton|myofibril|lamellipodium assembly|positive regulation of transcription by RNA polymerase II|metal ion binding|actin filament binding
Ablim3	16.0105	26.1271	5.89398	0.226624	-2.14163	0.0100904	0.0638649	Down	0.0374088	0.0556567	0.00560343	0.185906	0.104544	0.100586	319713	actin binding LIM protein family%2C member 3	protein_coding	mmu04360	Axon guidance	GO:0001725,GO:0003779,GO:0005737,GO:0006366,GO:0007010,GO:0015629,GO:0030027,GO:0030032,GO:0045202,GO:0045944,GO:0046872,GO:0051015,GO:0060271,GO:0098978	stress fiber|actin binding|cytoplasm|transcription by RNA polymerase II|cytoskeleton organization|actin cytoskeleton|lamellipodium|lamellipodium assembly|synapse|positive regulation of transcription by RNA polymerase II|metal ion binding|actin filament binding|cilium assembly|glutamatergic synapse
Abo	28.8956	40.256	17.5352	0.43531	-1.19989	0.0664304	0.23804	Down	0.381136	0.12736	0.117538	0.316182	0.288544	0.699603	80908	ABO blood group (transferase A%2C alpha 1-3-N-acetylgalactosaminyltransferase%2C transferase B%2C alpha 1-3-galactosyltransferase)	protein_coding	mmu00601,mmu00603	Glycosphingolipid biosynthesis - lacto and neolacto series|Glycosphingolipid biosynthesis - globo and isoglobo series	GO:0000166,GO:0001962,GO:0003823,GO:0004380,GO:0004381,GO:0005576,GO:0005794,GO:0005975,GO:0009312,GO:0016020,GO:0016740,GO:0016757,GO:0016758,GO:0030145,GO:0030259,GO:0031982,GO:0046872	nucleotide binding|alpha-1,3-galactosyltransferase activity|antigen binding|glycoprotein-fucosylgalactoside alpha-N-acetylgalactosaminyltransferase activity|fucosylgalactoside 3-alpha-galactosyltransferase activity|extracellular region|Golgi apparatus|carbohydrate metabolic process|oligosaccharide biosynthetic process|membrane|transferase activity|glycosyltransferase activity|hexosyltransferase a…			R-MMU-1430728,R-MMU-71387,R-MMU-9033658,R-MMU-9033807	Metabolism|Metabolism of carbohydrates|Blood group systems biosynthesis|ABO blood group biosynthesis
Abr	1703.24	1368.08	2038.4	1.49023	0.57553	2.10935e-05	0.000426339	Up	6.28074	5.44556	5.88492	2.99741	3.75702	3.82282	109934	active BCR-related gene	protein_coding			GO:0002692,GO:0005085,GO:0005096,GO:0005829,GO:0005886,GO:0006909,GO:0007165,GO:0007420,GO:0016020,GO:0016477,GO:0030036,GO:0032496,GO:0035556,GO:0042472,GO:0042995,GO:0043114,GO:0043312,GO:0043314,GO:0043547,GO:0045202,GO:0050728,GO:0050766,GO:0050804,GO:0050885,GO:0051649,GO:0060313,GO:0090630,GO:0098685,GO:0098978,GO:0099092,GO:1905517,GO:1905522	negative regulation of cellular extravasation|guanyl-nucleotide exchange factor activity|GTPase activator activity|cytosol|plasma membrane|phagocytosis|signal transduction|brain development|membrane|cell migration|actin cytoskeleton organization|response to lipopolysaccharide|intracellular signal transduction|inner ear morphogenesis|cell projection|regulation of vascular permeability|neutrophil d…			R-MMU-162582,R-MMU-193648,R-MMU-193704,R-MMU-194315,R-MMU-204998,R-MMU-372790,R-MMU-388396,R-MMU-416482,R-MMU-73887,R-MMU-8980692,R-MMU-9012999,R-MMU-9013026,R-MMU-9013106,R-MMU-9013148,R-MMU-9013149,R-MMU-9013404,R-MMU-9013423,R-MMU-9716542	Signal Transduction|NRAGE signals death through JNK|p75 NTR receptor-mediated signalling|Signaling by Rho GTPases|Cell death signalling via NRAGE, NRIF and NADE|Signaling by GPCR|GPCR downstream signalling|G alpha (12/13) signalling events|Death Receptor Signaling|RHOA GTPase cycle|RHO GTPase cycle|RHOB GTPase cycle|RHOC GTPase cycle|CDC42 GTPase cycle|RAC1 GTPase cycle|RAC2 GTPase cycle|RAC3 GTP…
Abracl	1469.58	1115.78	1823.37	1.63459	0.708925	1.64045e-08	8.10251e-07	Up	56.8903	56.7139	58.4629	32.1263	31.4363	30.3348	73112	ABRA C-terminal like	protein_coding			GO:0003674,GO:0005575,GO:0032970	molecular_function|cellular_component|regulation of actin filament-based process
Abraxas1	387.827	348.552	427.101	1.22516	0.29297	0.0499368	0.196459	Up	3.83447	3.52599	4.11838	2.62409	2.71643	3.04219	70681	BRCA1 A complex subunit	protein_coding	mmu03440	Homologous recombination	GO:0005634,GO:0006281,GO:0006282,GO:0006302,GO:0006325,GO:0006974,GO:0007095,GO:0008017,GO:0008608,GO:0010212,GO:0016604,GO:0031593,GO:0044818,GO:0045739,GO:0070531,GO:0070536,GO:0090307	nucleus|DNA repair|regulation of DNA repair|double-strand break repair|chromatin organization|DNA damage response|mitotic G2 DNA damage checkpoint signaling|microtubule binding|attachment of spindle microtubules to kinetochore|response to ionizing radiation|nuclear body|polyubiquitin modification-dependent protein binding|mitotic G2/M transition checkpoint|positive regulation of DNA repair|BRCA1-…			R-MMU-1640170,R-MMU-392499,R-MMU-5688426,R-MMU-5689901,R-MMU-5693532,R-MMU-5693538,R-MMU-5693565,R-MMU-5693567,R-MMU-5693571,R-MMU-5693606,R-MMU-5693607,R-MMU-597592,R-MMU-69473,R-MMU-69481,R-MMU-69620,R-MMU-73894	Cell Cycle|Metabolism of proteins|Deubiquitination|Metalloprotease DUBs|DNA Double-Strand Break Repair|Homology Directed Repair|Recruitment and ATM-mediated phosphorylation of repair and signaling proteins at DNA double strand breaks|HDR through Homologous Recombination (HRR) or Single Strand Annealing (SSA)|Nonhomologous End-Joining (NHEJ)|DNA Double Strand Break Response|Processing of DNA doubl…
Abraxas2	2193.88	2553.97	1833.78	0.717952	-0.47804	0.000330823	0.00428834	Down	19.6579	16.4702	16.6399	21.7874	19.155	24.936	109359	BRISC complex subunit	protein_coding			GO:0000278,GO:0002931,GO:0005515,GO:0005634,GO:0005737,GO:0005813,GO:0005856,GO:0005874,GO:0007049,GO:0007059,GO:0008017,GO:0008608,GO:0030496,GO:0031593,GO:0031616,GO:0036449,GO:0043066,GO:0051301,GO:0070536,GO:0070552,GO:0071497,GO:0090307	mitotic cell cycle|response to ischemia|protein binding|nucleus|cytoplasm|centrosome|cytoskeleton|microtubule|cell cycle|chromosome segregation|microtubule binding|attachment of spindle microtubules to kinetochore|midbody|polyubiquitin modification-dependent protein binding|spindle pole centrosome|microtubule minus-end|negative regulation of apoptotic process|cell division|protein K63-linked deub…			R-MMU-392499,R-MMU-5688426,R-MMU-5689901,R-MMU-597592	Metabolism of proteins|Deubiquitination|Metalloprotease DUBs|Post-translational protein modification
Abt1	796.046	783.785	808.307	1.03131	0.0444829	0.74773	0.886045	Up	5.49456	5.02334	4.57924	4.32252	4.04696	4.74149	30946	activator of basal transcription 1	protein_coding			GO:0000447,GO:0000472,GO:0000480,GO:0003676,GO:0003677,GO:0003723,GO:0005634,GO:0005667,GO:0005730,GO:0006357,GO:0021522,GO:0034462	endonucleolytic cleavage in ITS1 to separate SSU-rRNA from 5.8S rRNA and LSU-rRNA from tricistronic rRNA transcript (SSU-rRNA, 5.8S rRNA, LSU-rRNA)|endonucleolytic cleavage to generate mature 5'-end of SSU-rRNA from (SSU-rRNA, 5.8S rRNA, LSU-rRNA)|endonucleolytic cleavage in 5'-ETS of tricistronic rRNA transcript (SSU-rRNA, 5.8S rRNA, LSU-rRNA)|nucleic acid binding|DNA binding|RNA binding|nucleus…
Abtb1	1067.14	1003.91	1130.38	1.12564	0.170743	0.359511	0.637592	Up	16.8468	12.9333	13.3018	10.4125	9.37231	14.6758	80283	ankyrin repeat and BTB (POZ) domain containing 1	protein_coding			GO:0000151,GO:0003746,GO:0005730,GO:0005737,GO:0005829,GO:0005886,GO:0006412,GO:0006414	ubiquitin ligase complex|translation elongation factor activity|nucleolus|cytoplasm|cytosol|plasma membrane|translation|translational elongation
Abtb2	402.468	620.883	184.054	0.296348	-1.75463	7.39196e-09	3.84516e-07	Down	0.686596	1.24549	1.42168	2.47906	3.52274	4.21243	99382	ankyrin repeat and BTB (POZ) domain containing 2	protein_coding			GO:0046982,GO:0097237	protein heterodimerization activity|cellular response to toxic substance
Abtb3	150.225	159.953	140.498	0.87991	-0.184572	0.585468	0.801281	Down	0.569944	0.552384	0.374826	0.481953	0.663208	0.364152	74007	ankyrin repeat and BTB domain containing 3	protein_coding			GO:0016020,GO:0046982,GO:0060395	membrane|protein heterodimerization activity|SMAD protein signal transduction
Acaa1a	2855.18	2409.79	3300.57	1.36955	0.453706	0.00325991	0.0267968	Up	42.4423	48.0826	47.4686	24.6757	29.1326	36.9756	113868	acetyl-Coenzyme A acyltransferase 1A	protein_coding	mmu00071,mmu00592,mmu01040,mmu00280,mmu04146,mmu03320	Fatty acid degradation|alpha-Linolenic acid metabolism|Biosynthesis of unsaturated fatty acids|Valine, leucine and isoleucine degradation|Peroxisome|PPAR signaling pathway	GO:0000038,GO:0003985,GO:0003988,GO:0005739,GO:0005777,GO:0005782,GO:0006629,GO:0006631,GO:0006635,GO:0007584,GO:0008206,GO:0008775,GO:0010124,GO:0016401,GO:0016740,GO:0016746,GO:0016747,GO:0048545,GO:0050633	very long-chain fatty acid metabolic process|acetyl-CoA C-acetyltransferase activity|acetyl-CoA C-acyltransferase activity|mitochondrion|peroxisome|peroxisomal matrix|lipid metabolic process|fatty acid metabolic process|fatty acid beta-oxidation|response to nutrient|bile acid metabolic process|acetate CoA-transferase activity|phenylacetate catabolic process|palmitoyl-CoA oxidase activity|transfer…	WP4347,WP662,WP4348,WP2316	Eicosanoid metabolism via cyclooxygenases (COX)|Amino acid metabolism|Eicosanoid metabolism via lipoxygenases (LOX)|PPAR signaling pathway
Acaa1b	135.795	88.5851	183.005	2.06534	1.04638	0.00226721	0.0201063	Up	1.79627	2.6455	2.33891	1.35769	0.737363	0.825752	235674	acetyl-Coenzyme A acyltransferase 1B	protein_coding	mmu00071,mmu00592,mmu01040,mmu00280,mmu04146,mmu03320	Fatty acid degradation|alpha-Linolenic acid metabolism|Biosynthesis of unsaturated fatty acids|Valine, leucine and isoleucine degradation|Peroxisome|PPAR signaling pathway	GO:0000038,GO:0003985,GO:0003988,GO:0005739,GO:0005777,GO:0006629,GO:0006631,GO:0006635,GO:0008206,GO:0008775,GO:0010124,GO:0016401,GO:0016740,GO:0016746,GO:0016747,GO:0050633	very long-chain fatty acid metabolic process|acetyl-CoA C-acetyltransferase activity|acetyl-CoA C-acyltransferase activity|mitochondrion|peroxisome|lipid metabolic process|fatty acid metabolic process|fatty acid beta-oxidation|bile acid metabolic process|acetate CoA-transferase activity|phenylacetate catabolic process|palmitoyl-CoA oxidase activity|transferase activity|acyltransferase activity|ac…	WP2316	PPAR signaling pathway	R-MMU-1430728,R-MMU-168249,R-MMU-168256,R-MMU-2046104,R-MMU-2046106,R-MMU-390247,R-MMU-390918,R-MMU-556833,R-MMU-6798695,R-MMU-8978868,R-MMU-9033241,R-MMU-9609507	Metabolism|Innate Immune System|Immune System|alpha-linolenic (omega3) and linoleic (omega6) acid metabolism|alpha-linolenic acid (ALA) metabolism|Beta-oxidation of very long chain fatty acids|Peroxisomal lipid metabolism|Metabolism of lipids|Neutrophil degranulation|Fatty acid metabolism|Peroxisomal protein import|Protein localization
Acaa2	1415.26	839.14	1991.37	2.37279	1.24659	2.13913e-07	7.87254e-06	Up	24.3698	40.3858	45.5346	12.8902	12.7262	16.2043	52538	acetyl-Coenzyme A acyltransferase 2 (mitochondrial 3-oxoacyl-Coenzyme A thiolase)	protein_coding	mmu00062,mmu00071,mmu00280	Fatty acid elongation|Fatty acid degradation|Valine, leucine and isoleucine degradation	GO:0003985,GO:0003986,GO:0003988,GO:0005739,GO:0005743,GO:0005759,GO:0006084,GO:0006629,GO:0006631,GO:0006635,GO:0016290,GO:0016740,GO:0016746,GO:0016747,GO:0016787,GO:0047617,GO:0071456,GO:0102991,GO:1901029,GO:1902109	acetyl-CoA C-acetyltransferase activity|acetyl-CoA hydrolase activity|acetyl-CoA C-acyltransferase activity|mitochondrion|mitochondrial inner membrane|mitochondrial matrix|acetyl-CoA metabolic process|lipid metabolic process|fatty acid metabolic process|fatty acid beta-oxidation|palmitoyl-CoA hydrolase activity|transferase activity|acyltransferase activity|acyltransferase activity, transferring g…	WP336,WP2318	Fatty acid biosynthesis|Fatty acid oxidation	R-MMU-1430728,R-MMU-556833,R-MMU-77289,R-MMU-8978868	Metabolism|Metabolism of lipids|Mitochondrial Fatty Acid Beta-Oxidation|Fatty acid metabolism
Acaca	932.48	797.375	1067.59	1.3392	0.421367	0.0153331	0.0865353	Up	2.47404	2.63692	3.23614	1.86178	1.96766	1.71951	107476	acetyl-Coenzyme A carboxylase alpha	protein_coding	mmu00620,mmu00640,mmu00061,mmu04152,mmu04910,mmu04922,mmu04936	Pyruvate metabolism|Propanoate metabolism|Fatty acid biosynthesis|AMPK signaling pathway|Insulin signaling pathway|Glucagon signaling pathway|Alcoholic liver disease	GO:0000166,GO:0001650,GO:0001894,GO:0003824,GO:0003989,GO:0005515,GO:0005524,GO:0005737,GO:0005739,GO:0005829,GO:0006084,GO:0006629,GO:0006631,GO:0006633,GO:0008152,GO:0008610,GO:0009374,GO:0014070,GO:0015629,GO:0016874,GO:0019538,GO:0019900,GO:0042802,GO:0046872,GO:0051289,GO:0055088,GO:0071380	nucleotide binding|fibrillar center|tissue homeostasis|catalytic activity|acetyl-CoA carboxylase activity|protein binding|ATP binding|cytoplasm|mitochondrion|cytosol|acetyl-CoA metabolic process|lipid metabolic process|fatty acid metabolic process|fatty acid biosynthetic process|metabolic process|lipid biosynthetic process|biotin binding|response to organic cyclic compound|actin cytoskeleton|liga…	WP683,WP336,WP2841,WP3855	Leptin and adiponectin|Fatty acid biosynthesis|Focal adhesion: PI3K-Akt-mTOR signaling pathway|Dysregulated miRNA targeting in insulin/PI3K-AKT signaling	R-MMU-1430728,R-MMU-163685,R-MMU-163765,R-MMU-196780,R-MMU-196849,R-MMU-196854,R-MMU-200425,R-MMU-556833,R-MMU-75105,R-MMU-8978868	Metabolism|Integration of energy metabolism|ChREBP activates metabolic gene expression|Biotin transport and metabolism|Metabolism of water-soluble vitamins and cofactors|Metabolism of vitamins and cofactors|Carnitine metabolism|Metabolism of lipids|Fatty acyl-CoA biosynthesis|Fatty acid metabolism
Acacb	347.649	460.695	234.602	0.509545	-0.972719	0.00112504	0.0116443	Down	0.766626	0.632646	0.524116	1.35876	1.21865	0.754309	100705	acetyl-Coenzyme A carboxylase beta	protein_coding	mmu00620,mmu00640,mmu00061,mmu04152,mmu04910,mmu04922,mmu04920,mmu04936,mmu04931	Pyruvate metabolism|Propanoate metabolism|Fatty acid biosynthesis|AMPK signaling pathway|Insulin signaling pathway|Glucagon signaling pathway|Adipocytokine signaling pathway|Alcoholic liver disease|Insulin resistance	GO:0000166,GO:0003824,GO:0003989,GO:0005524,GO:0005634,GO:0005739,GO:0006084,GO:0006629,GO:0006631,GO:0006633,GO:0008152,GO:0009374,GO:0010629,GO:0010884,GO:0010906,GO:0014070,GO:0016874,GO:0031667,GO:0031999,GO:0042802,GO:0043086,GO:0046322,GO:0046872,GO:0050995,GO:0051289,GO:0060421,GO:0097009,GO:2001295	nucleotide binding|catalytic activity|acetyl-CoA carboxylase activity|ATP binding|nucleus|mitochondrion|acetyl-CoA metabolic process|lipid metabolic process|fatty acid metabolic process|fatty acid biosynthetic process|metabolic process|biotin binding|negative regulation of gene expression|positive regulation of lipid storage|regulation of glucose metabolic process|response to organic cyclic compo…	WP336	Fatty acid biosynthesis	R-MMU-1430728,R-MMU-163685,R-MMU-163765,R-MMU-196780,R-MMU-196849,R-MMU-196854,R-MMU-200425,R-MMU-556833,R-MMU-8978868	Metabolism|Integration of energy metabolism|ChREBP activates metabolic gene expression|Biotin transport and metabolism|Metabolism of water-soluble vitamins and cofactors|Metabolism of vitamins and cofactors|Carnitine metabolism|Metabolism of lipids|Fatty acid metabolism
Acad10	378.101	314.44	441.761	1.4045	0.490056	0.00504545	0.0377163	Up	3.54562	3.10116	2.7971	1.92394	1.80096	2.30814	71985	acyl-Coenzyme A dehydrogenase family%2C member 10	protein_coding			GO:0003995,GO:0005737,GO:0005739,GO:0016491,GO:0016627,GO:0033539,GO:0050660	acyl-CoA dehydrogenase activity|cytoplasm|mitochondrion|oxidoreductase activity|oxidoreductase activity, acting on the CH-CH group of donors|fatty acid beta-oxidation using acyl-CoA dehydrogenase|flavin adenine dinucleotide binding			R-MMU-1430728,R-MMU-556833,R-MMU-77289,R-MMU-8978868	Metabolism|Metabolism of lipids|Mitochondrial Fatty Acid Beta-Oxidation|Fatty acid metabolism
Acad11	1489.32	1372.32	1606.32	1.17016	0.226706	0.143036	0.383264	Up	12.1523	13.55	14.345	10.2696	8.43061	12.054	102632	acyl-Coenzyme A dehydrogenase family%2C member 11	protein_coding			GO:0003995,GO:0004466,GO:0005634,GO:0005737,GO:0005739,GO:0005777,GO:0006629,GO:0006631,GO:0016020,GO:0016491,GO:0016627,GO:0017099,GO:0031966,GO:0033539,GO:0050660,GO:0070991	acyl-CoA dehydrogenase activity|long-chain-acyl-CoA dehydrogenase activity|nucleus|cytoplasm|mitochondrion|peroxisome|lipid metabolic process|fatty acid metabolic process|membrane|oxidoreductase activity|oxidoreductase activity, acting on the CH-CH group of donors|very-long-chain-acyl-CoA dehydrogenase activity|mitochondrial membrane|fatty acid beta-oxidation using acyl-CoA dehydrogenase|flavin a…			R-MMU-1430728,R-MMU-556833,R-MMU-77289,R-MMU-8978868	Metabolism|Metabolism of lipids|Mitochondrial Fatty Acid Beta-Oxidation|Fatty acid metabolism
Acad12	181.192	229.997	132.388	0.575363	-0.797456	0.0335497	0.149853	Down	1.34752	1.04945	2.17633	1.34866	2.76364	3.02503	338350	acyl-Coenzyme A dehydrogenase family%2C member 12	protein_coding			GO:0003995,GO:0005737,GO:0005739,GO:0033539	acyl-CoA dehydrogenase activity|cytoplasm|mitochondrion|fatty acid beta-oxidation using acyl-CoA dehydrogenase
Acad8	797.54	781.759	813.321	1.03993	0.0564902	0.705253	0.866332	Up	8.38119	7.33724	7.52031	6.36161	5.70334	8.00772	66948	acyl-Coenzyme A dehydrogenase family%2C member 8	protein_coding	mmu00280	Valine, leucine and isoleucine degradation	GO:0003995,GO:0005739,GO:0006629,GO:0009083,GO:0016491,GO:0016627,GO:0050660	acyl-CoA dehydrogenase activity|mitochondrion|lipid metabolic process|branched-chain amino acid catabolic process|oxidoreductase activity|oxidoreductase activity, acting on the CH-CH group of donors|flavin adenine dinucleotide binding			R-MMU-1430728,R-MMU-70895,R-MMU-71291	Metabolism|Branched-chain amino acid catabolism|Metabolism of amino acids and derivatives
Acad9	979.266	951.977	1006.55	1.05704	0.080024	0.59915	0.80919	Up	7.82132	6.76584	6.72189	5.40516	5.34106	7.3838	229211	acyl-Coenzyme A dehydrogenase family%2C member 9	protein_coding			GO:0001676,GO:0003995,GO:0004466,GO:0005634,GO:0005739,GO:0005743,GO:0016020,GO:0016491,GO:0016627,GO:0030425,GO:0031966,GO:0032981,GO:0050660,GO:0051791,GO:0070991	long-chain fatty acid metabolic process|acyl-CoA dehydrogenase activity|long-chain-acyl-CoA dehydrogenase activity|nucleus|mitochondrion|mitochondrial inner membrane|membrane|oxidoreductase activity|oxidoreductase activity, acting on the CH-CH group of donors|dendrite|mitochondrial membrane|mitochondrial respiratory chain complex I assembly|flavin adenine dinucleotide binding|medium-chain fatty a…			R-MMU-1428517,R-MMU-1430728,R-MMU-163200,R-MMU-611105,R-MMU-6799198	The citric acid (TCA) cycle and respiratory electron transport|Metabolism|Respiratory electron transport, ATP synthesis by chemiosmotic coupling, and heat production by uncoupling proteins.|Respiratory electron transport|Complex I biogenesis
Acadl	2594.36	2809.1	2379.61	0.847016	-0.239539	0.0484796	0.192456	Down	33.4535	32.8746	35.374	31.5034	33.9296	42.448	11363	acyl-Coenzyme A dehydrogenase%2C long-chain	protein_coding	mmu00071,mmu03320	Fatty acid degradation|PPAR signaling pathway	GO:0000062,GO:0001659,GO:0003995,GO:0004466,GO:0005737,GO:0005739,GO:0005759,GO:0006629,GO:0006631,GO:0009062,GO:0009409,GO:0016401,GO:0016491,GO:0016627,GO:0019254,GO:0031966,GO:0033539,GO:0042413,GO:0042758,GO:0042802,GO:0044242,GO:0045717,GO:0046322,GO:0050660,GO:0090181,GO:0120162	fatty-acyl-CoA binding|temperature homeostasis|acyl-CoA dehydrogenase activity|long-chain-acyl-CoA dehydrogenase activity|cytoplasm|mitochondrion|mitochondrial matrix|lipid metabolic process|fatty acid metabolic process|fatty acid catabolic process|response to cold|palmitoyl-CoA oxidase activity|oxidoreductase activity|oxidoreductase activity, acting on the CH-CH group of donors|carnitine metabol…	WP401,WP1269,WP2316	Mitochondrial long chain fatty acid beta-oxidation|Fatty acid beta-oxidation|PPAR signaling pathway	R-MMU-1430728,R-MMU-556833,R-MMU-77285,R-MMU-77286,R-MMU-77289,R-MMU-77310,R-MMU-8978868	Metabolism|Metabolism of lipids|Beta oxidation of myristoyl-CoA to lauroyl-CoA|mitochondrial fatty acid beta-oxidation of saturated fatty acids|Mitochondrial Fatty Acid Beta-Oxidation|Beta oxidation of lauroyl-CoA to decanoyl-CoA-CoA|Fatty acid metabolism
Acadm	6902.67	7499.64	6305.7	0.840811	-0.250147	0.011404	0.0698944	Down	84.3792	84.3564	85.7724	81.5389	90.0552	99.7224	11364	acyl-Coenzyme A dehydrogenase%2C medium chain	protein_coding	mmu00071,mmu00280,mmu03320,mmu04936	Fatty acid degradation|Valine, leucine and isoleucine degradation|PPAR signaling pathway|Alcoholic liver disease	GO:0000062,GO:0001889,GO:0003995,GO:0005737,GO:0005739,GO:0005759,GO:0005978,GO:0006082,GO:0006111,GO:0006629,GO:0006631,GO:0006635,GO:0007507,GO:0009409,GO:0009437,GO:0009791,GO:0016491,GO:0016627,GO:0016853,GO:0019254,GO:0030424,GO:0031966,GO:0033539,GO:0042594,GO:0042802,GO:0045329,GO:0050660,GO:0051791,GO:0051793,GO:0055007,GO:0070991	fatty-acyl-CoA binding|liver development|acyl-CoA dehydrogenase activity|cytoplasm|mitochondrion|mitochondrial matrix|glycogen biosynthetic process|organic acid metabolic process|regulation of gluconeogenesis|lipid metabolic process|fatty acid metabolic process|fatty acid beta-oxidation|heart development|response to cold|carnitine metabolic process|post-embryonic development|oxidoreductase activi…	WP401,WP1269,WP662,WP2318,WP2316	Mitochondrial long chain fatty acid beta-oxidation|Fatty acid beta-oxidation|Amino acid metabolism|Fatty acid oxidation|PPAR signaling pathway	R-MMU-1430728,R-MMU-556833,R-MMU-77286,R-MMU-77288,R-MMU-77289,R-MMU-77346,R-MMU-77348,R-MMU-8978868	Metabolism|Metabolism of lipids|mitochondrial fatty acid beta-oxidation of saturated fatty acids|mitochondrial fatty acid beta-oxidation of unsaturated fatty acids|Mitochondrial Fatty Acid Beta-Oxidation|Beta oxidation of decanoyl-CoA to octanoyl-CoA-CoA|Beta oxidation of octanoyl-CoA to hexanoyl-CoA|Fatty acid metabolism
Acads	2168.35	1885.21	2451.49	1.30043	0.378994	0.00796687	0.0533359	Up	34.3988	37.9207	36.7021	20.7456	25.9041	28.671	11409	acyl-Coenzyme A dehydrogenase%2C short chain	protein_coding	mmu00640,mmu00650,mmu00071,mmu00280,mmu00410	Propanoate metabolism|Butanoate metabolism|Fatty acid degradation|Valine, leucine and isoleucine degradation|beta-Alanine metabolism	GO:0000062,GO:0003995,GO:0004085,GO:0005654,GO:0005739,GO:0005759,GO:0005813,GO:0006629,GO:0006631,GO:0016491,GO:0016627,GO:0016937,GO:0031966,GO:0033539,GO:0042802,GO:0046359,GO:0050660	fatty-acyl-CoA binding|acyl-CoA dehydrogenase activity|butyryl-CoA dehydrogenase activity|nucleoplasm|mitochondrion|mitochondrial matrix|centrosome|lipid metabolic process|fatty acid metabolic process|oxidoreductase activity|oxidoreductase activity, acting on the CH-CH group of donors|short-chain-acyl-CoA dehydrogenase activity|mitochondrial membrane|fatty acid beta-oxidation using acyl-CoA dehyd…	WP401,WP1269,WP2318	Mitochondrial long chain fatty acid beta-oxidation|Fatty acid beta-oxidation|Fatty acid oxidation	R-MMU-1430728,R-MMU-556833,R-MMU-77286,R-MMU-77289,R-MMU-77350,R-MMU-77352,R-MMU-8978868	Metabolism|Metabolism of lipids|mitochondrial fatty acid beta-oxidation of saturated fatty acids|Mitochondrial Fatty Acid Beta-Oxidation|Beta oxidation of hexanoyl-CoA to butanoyl-CoA|Beta oxidation of butanoyl-CoA to acetyl-CoA|Fatty acid metabolism
Acadsb	2160.34	2267.05	2053.63	0.905699	-0.142896	0.224862	0.497344	Down	17.8622	15.6547	17.5923	16.6461	14.8891	19.0176	66885	acyl-Coenzyme A dehydrogenase%2C short/branched chain	protein_coding	mmu00071,mmu00280	Fatty acid degradation|Valine, leucine and isoleucine degradation	GO:0003853,GO:0003995,GO:0005739,GO:0006550,GO:0006629,GO:0006631,GO:0006637,GO:0009055,GO:0016491,GO:0016627,GO:0016937,GO:0042802,GO:0050660,GO:0102035	2-methylacyl-CoA dehydrogenase activity|acyl-CoA dehydrogenase activity|mitochondrion|isoleucine catabolic process|lipid metabolic process|fatty acid metabolic process|acyl-CoA metabolic process|electron transfer activity|oxidoreductase activity|oxidoreductase activity, acting on the CH-CH group of donors|short-chain-acyl-CoA dehydrogenase activity|identical protein binding|flavin adenine dinucle…			R-MMU-1430728,R-MMU-70895,R-MMU-71291	Metabolism|Branched-chain amino acid catabolism|Metabolism of amino acids and derivatives
Acadvl	2386.21	2237.99	2534.43	1.1326	0.179637	0.171296	0.426669	Up	36.0701	31.4421	28.9229	23.6632	25.7033	26.802	11370	acyl-Coenzyme A dehydrogenase%2C very long chain	protein_coding	mmu00071,mmu04936	Fatty acid degradation|Alcoholic liver disease	GO:0000062,GO:0001659,GO:0003995,GO:0004466,GO:0005654,GO:0005730,GO:0005739,GO:0005743,GO:0006629,GO:0006631,GO:0006635,GO:0009062,GO:0009409,GO:0016020,GO:0016491,GO:0016627,GO:0017099,GO:0031966,GO:0033539,GO:0042645,GO:0042802,GO:0045717,GO:0046322,GO:0050660,GO:0090181	fatty-acyl-CoA binding|temperature homeostasis|acyl-CoA dehydrogenase activity|long-chain-acyl-CoA dehydrogenase activity|nucleoplasm|nucleolus|mitochondrion|mitochondrial inner membrane|lipid metabolic process|fatty acid metabolic process|fatty acid beta-oxidation|fatty acid catabolic process|response to cold|membrane|oxidoreductase activity|oxidoreductase activity, acting on the CH-CH group of …	WP401,WP1269,WP2318	Mitochondrial long chain fatty acid beta-oxidation|Fatty acid beta-oxidation|Fatty acid oxidation	R-MMU-1430728,R-MMU-556833,R-MMU-77286,R-MMU-77289,R-MMU-77305,R-MMU-8978868	Metabolism|Metabolism of lipids|mitochondrial fatty acid beta-oxidation of saturated fatty acids|Mitochondrial Fatty Acid Beta-Oxidation|Beta oxidation of palmitoyl-CoA to myristoyl-CoA|Fatty acid metabolism
Acan	28.8822	11.9302	45.8341	3.85717	1.94754	0.000143377	0.00217507	Up	0.214444	0.151468	0.128486	0.0320029	0.0455605	0.0370918	11595	aggrecan	protein_coding			GO:0001501,GO:0001502,GO:0002052,GO:0002063,GO:0005509,GO:0005515,GO:0005540,GO:0005576,GO:0005604,GO:0005615,GO:0007155,GO:0007417,GO:0007507,GO:0010001,GO:0030166,GO:0030199,GO:0030246,GO:0030336,GO:0031012,GO:0043025,GO:0045202,GO:0046872,GO:0072534,GO:0098966,GO:0098978,GO:0098982	skeletal system development|cartilage condensation|positive regulation of neuroblast proliferation|chondrocyte development|calcium ion binding|protein binding|hyaluronic acid binding|extracellular region|basement membrane|extracellular space|cell adhesion|central nervous system development|heart development|glial cell differentiation|proteoglycan biosynthetic process|collagen fibril organization|…	WP1270,WP2432	Endochondral ossification|Spinal cord injury	R-MMU-1430728,R-MMU-1474228,R-MMU-1474244,R-MMU-1630316,R-MMU-1638074,R-MMU-2022854,R-MMU-2022857,R-MMU-3000178,R-MMU-71387	Metabolism|Degradation of the extracellular matrix|Extracellular matrix organization|Glycosaminoglycan metabolism|Keratan sulfate/keratin metabolism|Keratan sulfate biosynthesis|Keratan sulfate degradation|ECM proteoglycans|Metabolism of carbohydrates
Acap1	38.6109	29.7168	47.505	1.59484	0.673414	0.124933	0.355882	Up	0.399671	0.444621	0.660027	0.216066	0.25719	0.376129	216859	ArfGAP with coiled-coil%2C ankyrin repeat and PH domains 1	protein_coding	mmu04144	Endocytosis	GO:0003674,GO:0005096,GO:0005737,GO:0005768,GO:0006629,GO:0007165,GO:0008150,GO:0016020,GO:0016042,GO:0046872	molecular_function|GTPase activator activity|cytoplasm|endosome|lipid metabolic process|signal transduction|biological_process|membrane|lipid catabolic process|metal ion binding
Acap2	2294.77	2531.98	2057.55	0.812578	-0.299421	0.0168745	0.0928399	Down	4.18524	3.49508	3.53158	3.95271	3.75124	4.66235	78618	ArfGAP with coiled-coil%2C ankyrin repeat and PH domains 2	protein_coding	mmu04144	Endocytosis	GO:0001726,GO:0005096,GO:0005515,GO:0005737,GO:0005768,GO:0010008,GO:0016020,GO:0030029,GO:0031267,GO:0032456,GO:0046872,GO:0080025,GO:1990090	ruffle|GTPase activator activity|protein binding|cytoplasm|endosome|endosome membrane|membrane|actin filament-based process|small GTPase binding|endocytic recycling|metal ion binding|phosphatidylinositol-3,5-bisphosphate binding|cellular response to nerve growth factor stimulus
Acap3	491.843	468.825	514.861	1.09831	0.135287	0.347408	0.627967	Up	3.40525	2.84114	3.31852	2.49624	2.56468	2.71725	140500	ArfGAP with coiled-coil%2C ankyrin repeat and PH domains 3	protein_coding	mmu04144	Endocytosis	GO:0001764,GO:0005096,GO:0010975,GO:0030426	neuron migration|GTPase activator activity|regulation of neuron projection development|growth cone
Acat1	3472.14	2458.48	4485.8	1.82443	0.867448	1.32324e-14	2.42165e-12	Up	34.906	37.6029	38.1285	16.8893	16.89	20.6608	110446	acetyl-Coenzyme A acetyltransferase 1	protein_coding	mmu00620,mmu00630,mmu00650,mmu00071,mmu00280,mmu00310,mmu00380,mmu00900,mmu04975	Pyruvate metabolism|Glyoxylate and dicarboxylate metabolism|Butanoate metabolism|Fatty acid degradation|Valine, leucine and isoleucine degradation|Lysine degradation|Tryptophan metabolism|Terpenoid backbone biosynthesis|Fat digestion and absorption	GO:0003985,GO:0005739,GO:0005743,GO:0005759,GO:0005783,GO:0006085,GO:0006550,GO:0006629,GO:0006631,GO:0006635,GO:0015936,GO:0015937,GO:0016453,GO:0016740,GO:0016746,GO:0016747,GO:0019899,GO:0030955,GO:0034736,GO:0042802,GO:0046356,GO:0046872,GO:0046952,GO:0120225,GO:1902860	acetyl-CoA C-acetyltransferase activity|mitochondrion|mitochondrial inner membrane|mitochondrial matrix|endoplasmic reticulum|acetyl-CoA biosynthetic process|isoleucine catabolic process|lipid metabolic process|fatty acid metabolic process|fatty acid beta-oxidation|coenzyme A metabolic process|coenzyme A biosynthetic process|C-acetyltransferase activity|transferase activity|acyltransferase activi…	WP543,WP79,WP4346,WP1269	Synthesis and degradation of ketone bodies|Tryptophan metabolism|Cholesterol metabolism with Bloch and Kandutsch-Russell pathways|Fatty acid beta-oxidation	R-MMU-1430728,R-MMU-556833,R-MMU-70895,R-MMU-71291,R-MMU-74182,R-MMU-77108,R-MMU-77111	Metabolism|Metabolism of lipids|Branched-chain amino acid catabolism|Metabolism of amino acids and derivatives|Ketone body metabolism|Utilization of Ketone Bodies|Synthesis of Ketone Bodies
Acat2	682.633	530.83	834.435	1.57226	0.652837	0.0614503	0.226277	Up	5.87786	11.5619	15.9788	5.22855	8.04744	5.65964	110460	acetyl-Coenzyme A acetyltransferase 2	protein_coding	mmu00620,mmu00630,mmu00650,mmu00071,mmu00280,mmu00310,mmu00380,mmu00900,mmu04975	Pyruvate metabolism|Glyoxylate and dicarboxylate metabolism|Butanoate metabolism|Fatty acid degradation|Valine, leucine and isoleucine degradation|Lysine degradation|Tryptophan metabolism|Terpenoid backbone biosynthesis|Fat digestion and absorption	GO:0003985,GO:0005737,GO:0005739,GO:0006635,GO:0016740,GO:0016746,GO:0016747,GO:0045797	acetyl-CoA C-acetyltransferase activity|cytoplasm|mitochondrion|fatty acid beta-oxidation|transferase activity|acyltransferase activity|acyltransferase activity, transferring groups other than amino-acyl groups|positive regulation of intestinal cholesterol absorption	WP4346	Cholesterol metabolism with Bloch and Kandutsch-Russell pathways	R-MMU-1430728,R-MMU-191273,R-MMU-556833,R-MMU-8957322	Metabolism|Cholesterol biosynthesis|Metabolism of lipids|Metabolism of steroids
Acat3	48.8771	40.7633	56.9909	1.3981	0.483471	0.548397	0.778436	Up	0.086305	0.665368	1.47374	0.266613	0.634715	0.525191	224530	acetyl-Coenzyme A acetyltransferase 3	protein_coding	mmu00620,mmu00630,mmu00650,mmu00071,mmu00280,mmu00310,mmu00380,mmu00900,mmu04975	Pyruvate metabolism|Glyoxylate and dicarboxylate metabolism|Butanoate metabolism|Fatty acid degradation|Valine, leucine and isoleucine degradation|Lysine degradation|Tryptophan metabolism|Terpenoid backbone biosynthesis|Fat digestion and absorption	GO:0003985,GO:0005737,GO:0005739,GO:0006635	acetyl-CoA C-acetyltransferase activity|cytoplasm|mitochondrion|fatty acid beta-oxidation
Acbd3	3927.71	4098.55	3756.88	0.91673	-0.125432	0.282035	0.562533	Down	32.0187	29.2028	28.8932	29.4412	29.4562	28.7989	170760	acyl-Coenzyme A binding domain containing 3	protein_coding	mmu05132	Salmonella infection	GO:0000062,GO:0000139,GO:0005739,GO:0005794,GO:0006629,GO:0006694,GO:0016020,GO:0034237	fatty-acyl-CoA binding|Golgi membrane|mitochondrion|Golgi apparatus|lipid metabolic process|steroid biosynthetic process|membrane|protein kinase A regulatory subunit binding			R-MMU-199991,R-MMU-199992,R-MMU-432722,R-MMU-5653656	Membrane Trafficking|trans-Golgi Network Vesicle Budding|Golgi Associated Vesicle Biogenesis|Vesicle-mediated transport
Acbd5	2453.01	2796.05	2109.96	0.754536	-0.406339	0.00234557	0.0206195	Down	14.179	13.7397	17.5254	16.9289	17.1252	19.8571	74159	acyl-Coenzyme A binding domain containing 5	protein_coding			GO:0000062,GO:0005654,GO:0005737,GO:0005777,GO:0006631,GO:0006914,GO:0008289,GO:0016020,GO:0030242	fatty-acyl-CoA binding|nucleoplasm|cytoplasm|peroxisome|fatty acid metabolic process|autophagy|lipid binding|membrane|autophagy of peroxisome			R-MMU-1430728,R-MMU-162582,R-MMU-194315,R-MMU-390918,R-MMU-556833,R-MMU-8978868,R-MMU-8980692,R-MMU-9012999,R-MMU-9013106,R-MMU-9603798,R-MMU-9609507,R-MMU-9716542	Metabolism|Signal Transduction|Signaling by Rho GTPases|Peroxisomal lipid metabolism|Metabolism of lipids|Fatty acid metabolism|RHOA GTPase cycle|RHO GTPase cycle|RHOC GTPase cycle|Class I peroxisomal membrane protein import|Protein localization|Signaling by Rho GTPases, Miro GTPases and RHOBTB3
Acbd6	721.097	754.34	687.854	0.911574	-0.133569	0.368439	0.645301	Down	6.19896	6.05562	5.61304	5.82048	4.99609	6.78342	72482	acyl-Coenzyme A binding domain containing 6	protein_coding			GO:0000062,GO:0003674,GO:0005737,GO:0008150,GO:0008289	fatty-acyl-CoA binding|molecular_function|cytoplasm|biological_process|lipid binding			R-MMU-1430728,R-MMU-556833,R-MMU-77289,R-MMU-8978868	Metabolism|Metabolism of lipids|Mitochondrial Fatty Acid Beta-Oxidation|Fatty acid metabolism
Acbd7	18.5504	21.9232	15.1776	0.690164	-0.534989	0.410983	0.68207	Down	0.610096	0.334416	0.606032	0.362278	0.562037	1.11333	78245	acyl-Coenzyme A binding domain containing 7	protein_coding			GO:0000062,GO:0005575,GO:0006631,GO:0008289	fatty-acyl-CoA binding|cellular_component|fatty acid metabolic process|lipid binding			R-MMU-1430728,R-MMU-556833,R-MMU-77289,R-MMU-8978868	Metabolism|Metabolism of lipids|Mitochondrial Fatty Acid Beta-Oxidation|Fatty acid metabolism
Accs	144.626	130.986	158.267	1.20584	0.270036	0.382736	0.657355	Up	0.739852	0.636798	0.731675	0.48613	0.333268	0.762068	329470	1-aminocyclopropane-1-carboxylate synthase (non-functional)	protein_coding			GO:0003824,GO:0005575,GO:0006520,GO:0008483,GO:0009058,GO:0030170,GO:0042802	catalytic activity|cellular_component|amino acid metabolic process|transaminase activity|biosynthetic process|pyridoxal phosphate binding|identical protein binding
Accsl	11.3803	10.749	12.0116	1.1102	0.150817	0.86492	0.9429	Up	0.0697801	0.123875	0.137186	0.0984098	0.0179615	0.155534	381411	1-aminocyclopropane-1-carboxylate synthase (non-functional)-like	protein_coding			GO:0003824,GO:0005575,GO:0006520,GO:0008483,GO:0009058,GO:0030170	catalytic activity|cellular_component|amino acid metabolic process|transaminase activity|biosynthetic process|pyridoxal phosphate binding
Acd	499.127	477.67	520.584	1.09046	0.124937	0.429791	0.696907	Up	10.1324	8.41343	8.49239	6.96752	7.73145	7.43876	497652	adrenocortical dysplasia	protein_coding			GO:0000723,GO:0000781,GO:0000783,GO:0001501,GO:0001655,GO:0003677,GO:0005515,GO:0005634,GO:0005654,GO:0005694,GO:0005697,GO:0006886,GO:0007004,GO:0016233,GO:0016604,GO:0030326,GO:0031848,GO:0032202,GO:0032206,GO:0032211,GO:0032212,GO:0035282,GO:0042162,GO:0044877,GO:0051973,GO:0060381,GO:0070182,GO:0070187,GO:0070198,GO:0070200	telomere maintenance|chromosome, telomeric region|nuclear telomere cap complex|skeletal system development|urogenital system development|DNA binding|protein binding|nucleus|nucleoplasm|chromosome|telomerase holoenzyme complex|intracellular protein transport|telomere maintenance via telomerase|telomere capping|nuclear body|embryonic limb morphogenesis|protection from non-homologous end joining at …			R-MMU-157579,R-MMU-1640170,R-MMU-171319,R-MMU-174411,R-MMU-174414,R-MMU-174417,R-MMU-174430,R-MMU-174437,R-MMU-180786,R-MMU-73886	Telomere Maintenance|Cell Cycle|Telomere Extension By Telomerase|Polymerase switching on the C-strand of the telomere|Processive synthesis on the C-strand of the telomere|Telomere C-strand (Lagging Strand) Synthesis|Telomere C-strand synthesis initiation|Removal of the Flap Intermediate from the C-strand|Extension of Telomeres|Chromosome Maintenance
Ace	2707.55	3845.9	1569.19	0.408021	-1.29329	6.61513e-21	3.02657e-18	Down	7.94456	7.672	9.03203	15.5403	19.4384	19.0366	11421	angiotensin I converting enzyme (peptidyl-dipeptidase A) 1	protein_coding	mmu04924,mmu04614,mmu05171,mmu05142,mmu05410,mmu05415	Renin secretion|Renin-angiotensin system|Coronavirus disease - COVID-19|Chagas disease|Hypertrophic cardiomyopathy|Diabetic cardiomyopathy	GO:0001822,GO:0002003,GO:0002446,GO:0003081,GO:0003084,GO:0003779,GO:0004175,GO:0004180,GO:0004222,GO:0005515,GO:0005516,GO:0005576,GO:0005615,GO:0005737,GO:0005764,GO:0005768,GO:0005886,GO:0006508,GO:0006518,GO:0007283,GO:0008217,GO:0008233,GO:0008237,GO:0008238,GO:0008240,GO:0008241,GO:0008270,GO:0008584,GO:0009792,GO:0009897,GO:0009925,GO:0010608,GO:0010629,GO:0010814,GO:0010815,GO:0014910,GO:…	kidney development|angiotensin maturation|neutrophil mediated immunity|regulation of systemic arterial blood pressure by renin-angiotensin|positive regulation of systemic arterial blood pressure|actin binding|endopeptidase activity|carboxypeptidase activity|metalloendopeptidase activity|protein binding|calmodulin binding|extracellular region|extracellular space|cytoplasm|lysosome|endosome|plasma …	WP396,WP4965	ACE inhibitor pathway|Deregulation of renin-angiotensin system by SARS-CoV infection	R-MMU-2022377,R-MMU-2980736,R-MMU-392499	Metabolism of Angiotensinogen to Angiotensins|Peptide hormone metabolism|Metabolism of proteins
Ace2	2645.07	3456.55	1833.6	0.530417	-0.914801	9.0134e-10	5.85318e-08	Down	13.1239	14.2084	14.5173	25.3835	19.2844	26.059	70008	angiotensin I converting enzyme (peptidyl-dipeptidase A) 2	protein_coding	mmu04614,mmu04974,mmu05171	Renin-angiotensin system|Protein digestion and absorption|Coronavirus disease - COVID-19	GO:0001618,GO:0003051,GO:0003081,GO:0004175,GO:0004180,GO:0004181,GO:0005515,GO:0005576,GO:0005615,GO:0005737,GO:0005886,GO:0006508,GO:0008233,GO:0008237,GO:0008241,GO:0009986,GO:0015827,GO:0016020,GO:0016324,GO:0016787,GO:0022898,GO:0031526,GO:0042802,GO:0042995,GO:0046718,GO:0046813,GO:0046872,GO:0048662,GO:0051957,GO:0060452,GO:0070373,GO:0098670,GO:1903598,GO:1903779,GO:1905737,GO:2000272	virus receptor activity|angiotensin-mediated drinking behavior|regulation of systemic arterial blood pressure by renin-angiotensin|endopeptidase activity|carboxypeptidase activity|metallocarboxypeptidase activity|protein binding|extracellular region|extracellular space|cytoplasm|plasma membrane|proteolysis|peptidase activity|metallopeptidase activity|peptidyl-dipeptidase activity|cell surface|try…	WP4965	Deregulation of renin-angiotensin system by SARS-CoV infection	R-MMU-2022377,R-MMU-2980736,R-MMU-392499	Metabolism of Angiotensinogen to Angiotensins|Peptide hormone metabolism|Metabolism of proteins
Ace3	21.2671	6.18164	36.3525	5.84538	2.5473	0.000196987	0.00282044	Up	0.221101	0.215315	0.291443	0.0653327	0.0130084	0.0312898	217246	angiotensin I converting enzyme (peptidyl-dipeptidase A) 3	protein_coding	mmu04924,mmu04614,mmu05171,mmu05142,mmu05410,mmu05415	Renin secretion|Renin-angiotensin system|Coronavirus disease - COVID-19|Chagas disease|Hypertrophic cardiomyopathy|Diabetic cardiomyopathy	GO:0001669,GO:0003081,GO:0003084,GO:0005515,GO:0005886,GO:0006508,GO:0008237,GO:0008241,GO:0016020,GO:0031410,GO:0046872	acrosomal vesicle|regulation of systemic arterial blood pressure by renin-angiotensin|positive regulation of systemic arterial blood pressure|protein binding|plasma membrane|proteolysis|metallopeptidase activity|peptidyl-dipeptidase activity|membrane|cytoplasmic vesicle|metal ion binding
Acer2	3455.68	4656.33	2255.04	0.484251	-1.04617	5.46005e-06	0.00013354	Down	10.1039	7.68042	8.83757	15.1279	11.2386	23.356	230379	alkaline ceramidase 2	protein_coding	mmu00600,mmu04071	Sphingolipid metabolism|Sphingolipid signaling pathway	GO:0000139,GO:0001953,GO:0005794,GO:0006629,GO:0006665,GO:0006672,GO:0006919,GO:0006974,GO:0008284,GO:0010506,GO:0016020,GO:0016787,GO:0016811,GO:0017040,GO:0030330,GO:0032526,GO:0033629,GO:0042981,GO:0046512,GO:0046514,GO:0046872,GO:0060049,GO:0071633,GO:0102121	Golgi membrane|negative regulation of cell-matrix adhesion|Golgi apparatus|lipid metabolic process|sphingolipid metabolic process|ceramide metabolic process|activation of cysteine-type endopeptidase activity involved in apoptotic process|DNA damage response|positive regulation of cell population proliferation|regulation of autophagy|membrane|hydrolase activity|hydrolase activity, acting on carbon…			R-MMU-1430728,R-MMU-1660661,R-MMU-428157,R-MMU-556833	Metabolism|Sphingolipid de novo biosynthesis|Sphingolipid metabolism|Metabolism of lipids
Acer3	806.67	825.316	788.023	0.954464	-0.0672377	0.76486	0.894954	Down	6.3746	4.349	4.90154	4.82405	3.57122	6.33343	66190	alkaline ceramidase 3	protein_coding	mmu00600	Sphingolipid metabolism	GO:0000139,GO:0005509,GO:0005783,GO:0005789,GO:0005794,GO:0006629,GO:0006665,GO:0006672,GO:0006954,GO:0008270,GO:0008284,GO:0016020,GO:0016787,GO:0016811,GO:0017040,GO:0042552,GO:0043067,GO:0046512,GO:0046514,GO:0046872,GO:0070774,GO:0071602,GO:0071633,GO:0102121	Golgi membrane|calcium ion binding|endoplasmic reticulum|endoplasmic reticulum membrane|Golgi apparatus|lipid metabolic process|sphingolipid metabolic process|ceramide metabolic process|inflammatory response|zinc ion binding|positive regulation of cell population proliferation|membrane|hydrolase activity|hydrolase activity, acting on carbon-nitrogen (but not peptide) bonds, in linear amides|N-acy…			R-MMU-1430728,R-MMU-1660661,R-MMU-428157,R-MMU-556833	Metabolism|Sphingolipid de novo biosynthesis|Sphingolipid metabolism|Metabolism of lipids
Ache	122.164	206.977	37.3503	0.180169	-2.47258	1.89678e-12	2.20718e-10	Down	0.244582	0.15989	0.28698	0.782936	1.08524	1.58642	11423	acetylcholinesterase	protein_coding	mmu00564,mmu04725	Glycerophospholipid metabolism|Cholinergic synapse	GO:0001919,GO:0003990,GO:0004104,GO:0005515,GO:0005518,GO:0005576,GO:0005604,GO:0005615,GO:0005635,GO:0005788,GO:0005794,GO:0005886,GO:0006581,GO:0007155,GO:0007416,GO:0008291,GO:0009986,GO:0016020,GO:0016787,GO:0017171,GO:0019695,GO:0030424,GO:0030425,GO:0031594,GO:0031623,GO:0032868,GO:0033265,GO:0042135,GO:0042166,GO:0042734,GO:0042802,GO:0042803,GO:0043025,GO:0043083,GO:0043236,GO:0043621,GO:…	regulation of receptor recycling|acetylcholinesterase activity|cholinesterase activity|protein binding|collagen binding|extracellular region|basement membrane|extracellular space|nuclear envelope|endoplasmic reticulum lumen|Golgi apparatus|plasma membrane|acetylcholine catabolic process|cell adhesion|synapse assembly|acetylcholine metabolic process|cell surface|membrane|hydrolase activity|serine …	WP522,WP175	Biogenic amine synthesis|Acetylcholine synthesis
Acin1	3995.95	3635.01	4356.89	1.19848	0.261208	0.0131511	0.0776098	Up	24.2635	21.8358	25.0088	16.4675	16.6015	20.1067	56215	apoptotic chromatin condensation inducer 1	protein_coding	mmu03040,mmu03013,mmu03015	Spliceosome|Nucleocytoplasmic transport|mRNA surveillance pathway	GO:0003676,GO:0005634,GO:0005654,GO:0005730,GO:0005829,GO:0005886,GO:0006397,GO:0006915,GO:0008380,GO:0016607,GO:0030263,GO:0035145,GO:0043065,GO:0048025,GO:0061574	nucleic acid binding|nucleus|nucleoplasm|nucleolus|cytosol|plasma membrane|mRNA processing|apoptotic process|RNA splicing|nuclear speck|apoptotic chromosome condensation|exon-exon junction complex|positive regulation of apoptotic process|negative regulation of mRNA splicing, via spliceosome|ASAP complex	WP310	mRNA processing	R-MMU-109581,R-MMU-111465,R-MMU-5357801,R-MMU-72163,R-MMU-72172,R-MMU-72203,R-MMU-75153,R-MMU-8953854	Apoptosis|Apoptotic cleavage of cellular proteins|Programmed Cell Death|mRNA Splicing - Major Pathway|mRNA Splicing|Processing of Capped Intron-Containing Pre-mRNA|Apoptotic execution phase|Metabolism of RNA
Ackr1	2.68704	3.49825	1.87583	0.538475	-0.893048	0.515414	0.759317	Down	0.0678376	0.0428182	0.0237098	0.0425201	0.0931279	0.0896024	13349	atypical chemokine receptor 1 (Duffy blood group)	protein_coding	mmu05144	Malaria	GO:0004930,GO:0005768,GO:0006954,GO:0007165,GO:0007186,GO:0016020,GO:0019956,GO:0019957,GO:0032642,GO:0070098	G protein-coupled receptor activity|endosome|inflammatory response|signal transduction|G protein-coupled receptor signaling pathway|membrane|chemokine binding|C-C chemokine binding|regulation of chemokine production|chemokine-mediated signaling pathway	WP1396,WP41	GPCRs, non-odorant |GPCRs, other
Ackr2	524.671	669.565	379.777	0.567364	-0.817653	0.000592884	0.0068988	Down	2.60331	4.08177	3.24252	5.71367	5.32661	4.57469	59289	atypical chemokine receptor 2	protein_coding			GO:0004930,GO:0004950,GO:0005044,GO:0005515,GO:0005654,GO:0005768,GO:0005829,GO:0005884,GO:0005886,GO:0006935,GO:0006954,GO:0006955,GO:0007165,GO:0007186,GO:0007204,GO:0009897,GO:0016020,GO:0016493,GO:0019722,GO:0019957,GO:0031965,GO:0043231,GO:0060326	G protein-coupled receptor activity|chemokine receptor activity|scavenger receptor activity|protein binding|nucleoplasm|endosome|cytosol|actin filament|plasma membrane|chemotaxis|inflammatory response|immune response|signal transduction|G protein-coupled receptor signaling pathway|positive regulation of cytosolic calcium ion concentration|external side of plasma membrane|membrane|C-C chemokine re…	WP1396,WP189	GPCRs, non-odorant |GPCRs, class A rhodopsin-like	R-MMU-162582,R-MMU-372790,R-MMU-373076,R-MMU-375276,R-MMU-380108,R-MMU-500792	Signal Transduction|Signaling by GPCR|Class A/1 (Rhodopsin-like receptors)|Peptide ligand-binding receptors|Chemokine receptors bind chemokines|GPCR ligand binding
Ackr3	1222.42	1200.27	1244.57	1.0372	0.0526883	0.693558	0.860844	Up	15.1903	14.7983	14.4257	13.1579	12.8302	12.1993	12778	atypical chemokine receptor 3	protein_coding	mmu04060,mmu04061	Cytokine-cytokine receptor interaction|Viral protein interaction with cytokine and cytokine receptor	GO:0001525,GO:0001570,GO:0004930,GO:0005044,GO:0005768,GO:0005886,GO:0005905,GO:0006935,GO:0006955,GO:0007155,GO:0007165,GO:0007186,GO:0007204,GO:0007275,GO:0008285,GO:0009897,GO:0009986,GO:0015026,GO:0016020,GO:0016493,GO:0016494,GO:0019722,GO:0019956,GO:0019957,GO:0019958,GO:0021557,GO:0031623,GO:0043231,GO:0060326,GO:0070098,GO:0070374,GO:1902230,GO:1905322	angiogenesis|vasculogenesis|G protein-coupled receptor activity|scavenger receptor activity|endosome|plasma membrane|clathrin-coated pit|chemotaxis|immune response|cell adhesion|signal transduction|G protein-coupled receptor signaling pathway|positive regulation of cytosolic calcium ion concentration|multicellular organism development|negative regulation of cell population proliferation|external …	WP1396,WP385,WP189	GPCRs, non-odorant |Myometrial relaxation and contraction pathways|GPCRs, class A rhodopsin-like	R-MMU-162582,R-MMU-372790,R-MMU-373076,R-MMU-375276,R-MMU-380108,R-MMU-388396,R-MMU-418594,R-MMU-500792	Signal Transduction|Signaling by GPCR|Class A/1 (Rhodopsin-like receptors)|Peptide ligand-binding receptors|Chemokine receptors bind chemokines|GPCR downstream signalling|G alpha (i) signalling events|GPCR ligand binding
Ackr4	84.1255	72.567	95.684	1.31819	0.398553	0.25097	0.528149	Up	1.08814	0.911709	0.918812	0.896309	0.495733	0.57236	252837	atypical chemokine receptor 4	protein_coding	mmu04060,mmu04061	Cytokine-cytokine receptor interaction|Viral protein interaction with cytokine and cytokine receptor	GO:0004930,GO:0004950,GO:0005044,GO:0005768,GO:0005886,GO:0006935,GO:0006955,GO:0007165,GO:0007186,GO:0007204,GO:0009897,GO:0016020,GO:0016493,GO:0019722,GO:0019956,GO:0019957,GO:0060326	G protein-coupled receptor activity|chemokine receptor activity|scavenger receptor activity|endosome|plasma membrane|chemotaxis|immune response|signal transduction|G protein-coupled receptor signaling pathway|positive regulation of cytosolic calcium ion concentration|external side of plasma membrane|membrane|C-C chemokine receptor activity|calcium-mediated signaling|chemokine binding|C-C chemokin…			R-MMU-162582,R-MMU-372790,R-MMU-373076,R-MMU-375276,R-MMU-380108,R-MMU-500792	Signal Transduction|Signaling by GPCR|Class A/1 (Rhodopsin-like receptors)|Peptide ligand-binding receptors|Chemokine receptors bind chemokines|GPCR ligand binding
Acly	6889.26	6864.47	6914.06	1.00722	0.0103817	0.930405	0.972148	Up	22.1208	25.7901	25.3193	20.8576	20.92	23.387	104112	ATP citrate lyase	protein_coding	mmu00020	Citrate cycle (TCA cycle)	GO:0000166,GO:0003824,GO:0003878,GO:0005515,GO:0005524,GO:0005654,GO:0005737,GO:0005739,GO:0005829,GO:0006084,GO:0006085,GO:0006099,GO:0006101,GO:0006107,GO:0006629,GO:0006633,GO:0008610,GO:0016740,GO:0046872,GO:0046912	nucleotide binding|catalytic activity|ATP citrate synthase activity|protein binding|ATP binding|nucleoplasm|cytoplasm|mitochondrion|cytosol|acetyl-CoA metabolic process|acetyl-CoA biosynthetic process|tricarboxylic acid cycle|citrate metabolic process|oxaloacetate metabolic process|lipid metabolic process|fatty acid biosynthetic process|lipid biosynthetic process|transferase activity|metal ion bi…	WP336,WP662	Fatty acid biosynthesis|Amino acid metabolism	R-MMU-1430728,R-MMU-168249,R-MMU-168256,R-MMU-556833,R-MMU-6798695,R-MMU-75105,R-MMU-8978868	Metabolism|Innate Immune System|Immune System|Metabolism of lipids|Neutrophil degranulation|Fatty acyl-CoA biosynthesis|Fatty acid metabolism
Acmsd	13.5145	13.3974	13.6317	1.01328	0.0190284	0.97775	0.992441	Up	0.0964724	0.127873	0.192192	0.0907024	0.0993285	0.18158	266645	amino carboxymuconate semialdehyde decarboxylase	protein_coding	mmu00380	Tryptophan metabolism	GO:0001760,GO:0005737,GO:0005829,GO:0006569,GO:0008270,GO:0016787,GO:0016829,GO:0016831,GO:0019748,GO:0046872,GO:0046874,GO:1904985	aminocarboxymuconate-semialdehyde decarboxylase activity|cytoplasm|cytosol|tryptophan catabolic process|zinc ion binding|hydrolase activity|lyase activity|carboxy-lyase activity|secondary metabolic process|metal ion binding|quinolinate metabolic process|negative regulation of quinolinate biosynthetic process	WP79	Tryptophan metabolism
Acnat1	675.048	753.216	596.88	0.792446	-0.335616	0.75996	0.891594	Down	0.214009	2.72757	4.82014	3.29673	3.80094	1.51256	230161	acyl-coenzyme A amino acid N-acyltransferase 1	protein_coding	mmu00120,mmu01040,mmu00430,mmu04146,mmu04976	Primary bile acid biosynthesis|Biosynthesis of unsaturated fatty acids|Taurine and hypotaurine metabolism|Peroxisome|Bile secretion	GO:0005777,GO:0006629,GO:0006631,GO:0006637,GO:0016410,GO:0016740,GO:0016746,GO:0016790,GO:0047617	peroxisome|lipid metabolic process|fatty acid metabolic process|acyl-CoA metabolic process|N-acyltransferase activity|transferase activity|acyltransferase activity|thiolester hydrolase activity|acyl-CoA hydrolase activity
Acnat2	6.72892	8.45143	5.00641	0.594712	-0.749736	0.657307	0.843545	Down	0	0.0982847	0.0362822	0.0569336	0.14251	0	209186	acyl-coenzyme A amino acid N-acyltransferase 2	protein_coding	mmu00120,mmu01040,mmu00430,mmu04146,mmu04976	Primary bile acid biosynthesis|Biosynthesis of unsaturated fatty acids|Taurine and hypotaurine metabolism|Peroxisome|Bile secretion	GO:0005777,GO:0006629,GO:0006631,GO:0006637,GO:0016740,GO:0016746,GO:0016790,GO:0047617	peroxisome|lipid metabolic process|fatty acid metabolic process|acyl-CoA metabolic process|transferase activity|acyltransferase activity|thiolester hydrolase activity|acyl-CoA hydrolase activity
Aco1	4823.29	3680.93	5965.64	1.62058	0.696507	3.2578e-05	0.000618121	Up	44.308	35.5261	32.9242	21.1516	16.9884	24.3021	11428	aconitase 1	protein_coding	mmu00020,mmu00630	Citrate cycle (TCA cycle)|Glyoxylate and dicarboxylate metabolism	GO:0003723,GO:0003994,GO:0005737,GO:0005739,GO:0005783,GO:0005794,GO:0005829,GO:0006099,GO:0006101,GO:0006417,GO:0006879,GO:0009791,GO:0010040,GO:0010468,GO:0016829,GO:0030350,GO:0046872,GO:0047780,GO:0048027,GO:0050892,GO:0051536,GO:0051538,GO:0051539	RNA binding|aconitate hydratase activity|cytoplasm|mitochondrion|endoplasmic reticulum|Golgi apparatus|cytosol|tricarboxylic acid cycle|citrate metabolic process|regulation of translation|intracellular iron ion homeostasis|post-embryonic development|response to iron(II) ion|regulation of gene expression|lyase activity|iron-responsive element binding|metal ion binding|citrate dehydratase activity|…	WP310	mRNA processing	R-MMU-382551,R-MMU-917937	Transport of small molecules|Iron uptake and transport
Aco2	6506.39	6046.91	6965.86	1.15204	0.204196	0.188198	0.451584	Up	64.2638	74.6784	70.2511	55.6591	57.2451	48.8755	11429	aconitase 2%2C mitochondrial	protein_coding	mmu00020,mmu00630	Citrate cycle (TCA cycle)|Glyoxylate and dicarboxylate metabolism	GO:0003994,GO:0005506,GO:0005739,GO:0005759,GO:0005829,GO:0006099,GO:0006101,GO:0006102,GO:0016829,GO:0043209,GO:0046872,GO:0047780,GO:0051536,GO:0051538,GO:0051539	aconitate hydratase activity|iron ion binding|mitochondrion|mitochondrial matrix|cytosol|tricarboxylic acid cycle|citrate metabolic process|isocitrate metabolic process|lyase activity|myelin sheath|metal ion binding|citrate dehydratase activity|iron-sulfur cluster binding|3 iron, 4 sulfur cluster binding|4 iron, 4 sulfur cluster binding	WP434,WP662	TCA cycle|Amino acid metabolism	R-MMU-1428517,R-MMU-1430728,R-MMU-71403,R-MMU-71406	The citric acid (TCA) cycle and respiratory electron transport|Metabolism|Citric acid cycle (TCA cycle)|Pyruvate metabolism and Citric Acid (TCA) cycle
Acod1	27.3394	40.2514	14.4274	0.358228	-1.48105	0.0442289	0.181329	Down	0.172748	0.173175	0.117202	0.0955389	0.345263	0.754982	16365	aconitate decarboxylase 1	protein_coding			GO:0002376,GO:0002760,GO:0005739,GO:0006952,GO:0006954,GO:0007566,GO:0009617,GO:0016829,GO:0032088,GO:0032480,GO:0032496,GO:0034136,GO:0034144,GO:0035458,GO:0042803,GO:0045087,GO:0045824,GO:0047613,GO:0050728,GO:0051607,GO:0071219,GO:0071222,GO:0071346,GO:0071347,GO:0071356,GO:0071393,GO:0072573,GO:2000379	immune system process|positive regulation of antimicrobial humoral response|mitochondrion|defense response|inflammatory response|embryo implantation|response to bacterium|lyase activity|negative regulation of NF-kappaB transcription factor activity|negative regulation of type I interferon production|response to lipopolysaccharide|negative regulation of toll-like receptor 2 signaling pathway|negat…
Acot1	275.609	184.362	366.857	1.98861	0.991762	0.00243353	0.0212536	Up	3.81233	6.54811	9.21507	2.79133	2.51838	3.54266	26897	acyl-CoA thioesterase 1	protein_coding	mmu00062,mmu01040,mmu04913	Fatty acid elongation|Biosynthesis of unsaturated fatty acids|Ovarian steroidogenesis	GO:0000038,GO:0001676,GO:0005737,GO:0005739,GO:0005829,GO:0006629,GO:0006631,GO:0006637,GO:0010667,GO:0016290,GO:0016787,GO:0016790,GO:0047617,GO:0052689,GO:0102991	very long-chain fatty acid metabolic process|long-chain fatty acid metabolic process|cytoplasm|mitochondrion|cytosol|lipid metabolic process|fatty acid metabolic process|acyl-CoA metabolic process|negative regulation of cardiac muscle cell apoptotic process|palmitoyl-CoA hydrolase activity|hydrolase activity|thiolester hydrolase activity|acyl-CoA hydrolase activity|carboxylic ester hydrolase acti…	WP4350,WP4351,WP4346	Omega-3 / omega-6 fatty acid synthesis|Omega-9 fatty acid synthesis|Cholesterol metabolism with Bloch and Kandutsch-Russell pathways	R-MMU-1430728,R-MMU-556833,R-MMU-77289,R-MMU-8978868,R-MMU-9033241,R-MMU-9609507	Metabolism|Metabolism of lipids|Mitochondrial Fatty Acid Beta-Oxidation|Fatty acid metabolism|Peroxisomal protein import|Protein localization
Acot10	1.47308	0.722745	2.22341	3.11251	1.63808	0.473824	0.730241	Up	0.0684408	0	0.0538213	0.0160868	0.0176168	0	64833	acyl-CoA thioesterase 10	protein_coding			GO:0005739,GO:0006637,GO:0016787,GO:0047617,GO:0052689	mitochondrion|acyl-CoA metabolic process|hydrolase activity|acyl-CoA hydrolase activity|carboxylic ester hydrolase activity
Acot11	139.274	121.291	157.257	1.29798	0.376264	0.342785	0.624411	Up	0.487836	0.703403	1.03709	0.479698	0.691209	0.345822	329910	acyl-CoA thioesterase 11	protein_coding			GO:0005737,GO:0005739,GO:0005759,GO:0005829,GO:0006629,GO:0006631,GO:0006637,GO:0008289,GO:0009266,GO:0009409,GO:0016290,GO:0016787,GO:0016790,GO:0035556,GO:0047617,GO:0052689,GO:0052816,GO:0102991,GO:0120163	cytoplasm|mitochondrion|mitochondrial matrix|cytosol|lipid metabolic process|fatty acid metabolic process|acyl-CoA metabolic process|lipid binding|response to temperature stimulus|response to cold|palmitoyl-CoA hydrolase activity|hydrolase activity|thiolester hydrolase activity|intracellular signal transduction|acyl-CoA hydrolase activity|carboxylic ester hydrolase activity|long-chain acyl-CoA hy…			R-MMU-1430728,R-MMU-556833,R-MMU-77289,R-MMU-8978868	Metabolism|Metabolism of lipids|Mitochondrial Fatty Acid Beta-Oxidation|Fatty acid metabolism
Acot12	25.2365	10.8217	39.6513	3.66268	1.8729	0.0912952	0.292607	Up	0.00859986	0.227981	0.847613	0.129368	0.0708357	0.0596348	74156	acyl-CoA thioesterase 12	protein_coding	mmu00620	Pyruvate metabolism	GO:0003986,GO:0005524,GO:0005654,GO:0005737,GO:0005829,GO:0006084,GO:0006629,GO:0006631,GO:0006637,GO:0008289,GO:0016787,GO:0016790,GO:0042802,GO:0045171,GO:0047617,GO:0052689	acetyl-CoA hydrolase activity|ATP binding|nucleoplasm|cytoplasm|cytosol|acetyl-CoA metabolic process|lipid metabolic process|fatty acid metabolic process|acyl-CoA metabolic process|lipid binding|hydrolase activity|thiolester hydrolase activity|identical protein binding|intercellular bridge|acyl-CoA hydrolase activity|carboxylic ester hydrolase activity			R-MMU-1430728,R-MMU-556833,R-MMU-77289,R-MMU-8978868	Metabolism|Metabolism of lipids|Mitochondrial Fatty Acid Beta-Oxidation|Fatty acid metabolism
Acot13	484.981	516.077	453.886	0.879385	-0.185433	0.606419	0.812581	Down	11.1174	20.3618	23.4745	10.2722	20.5643	25.862	66834	acyl-CoA thioesterase 13	protein_coding			GO:0005634,GO:0005737,GO:0005739,GO:0005759,GO:0005856,GO:0006629,GO:0016290,GO:0016787,GO:0047617,GO:0051289,GO:0102991,GO:0120163	nucleus|cytoplasm|mitochondrion|mitochondrial matrix|cytoskeleton|lipid metabolic process|palmitoyl-CoA hydrolase activity|hydrolase activity|acyl-CoA hydrolase activity|protein homotetramerization|myristoyl-CoA hydrolase activity|negative regulation of cold-induced thermogenesis			R-MMU-1430728,R-MMU-556833,R-MMU-77289,R-MMU-8978868	Metabolism|Metabolism of lipids|Mitochondrial Fatty Acid Beta-Oxidation|Fatty acid metabolism
Acot2	496.64	463.989	529.291	1.13991	0.18892	0.308546	0.587848	Up	7.42331	5.77199	6.86855	5.00129	4.28308	6.52482	171210	acyl-CoA thioesterase 2	protein_coding	mmu00062,mmu01040,mmu04913	Fatty acid elongation|Biosynthesis of unsaturated fatty acids|Ovarian steroidogenesis	GO:0000038,GO:0001666,GO:0001676,GO:0005739,GO:0006629,GO:0006631,GO:0006637,GO:0016290,GO:0016787,GO:0016790,GO:0042760,GO:0047617,GO:0052689,GO:0102991	very long-chain fatty acid metabolic process|response to hypoxia|long-chain fatty acid metabolic process|mitochondrion|lipid metabolic process|fatty acid metabolic process|acyl-CoA metabolic process|palmitoyl-CoA hydrolase activity|hydrolase activity|thiolester hydrolase activity|very long-chain fatty acid catabolic process|acyl-CoA hydrolase activity|carboxylic ester hydrolase activity|myristoyl…	WP4350,WP4351,WP4346	Omega-3 / omega-6 fatty acid synthesis|Omega-9 fatty acid synthesis|Cholesterol metabolism with Bloch and Kandutsch-Russell pathways	R-MMU-1430728,R-MMU-556833,R-MMU-77289,R-MMU-8978868,R-MMU-9033241,R-MMU-9609507	Metabolism|Metabolism of lipids|Mitochondrial Fatty Acid Beta-Oxidation|Fatty acid metabolism|Peroxisomal protein import|Protein localization
Acot3	3.73305	5.28957	2.17653	0.41366	-1.27348	0.387989	0.662716	Down	0	0.0434787	0.00802516	0.03598	0.0472822	0.0303282	171281	acyl-CoA thioesterase 3	protein_coding	mmu00062,mmu01040,mmu04913	Fatty acid elongation|Biosynthesis of unsaturated fatty acids|Ovarian steroidogenesis	GO:0000038,GO:0001676,GO:0005777,GO:0005829,GO:0006629,GO:0006631,GO:0006637,GO:0016290,GO:0016787,GO:0016790,GO:0032788,GO:0032789,GO:0047617,GO:0052689,GO:0102991	very long-chain fatty acid metabolic process|long-chain fatty acid metabolic process|peroxisome|cytosol|lipid metabolic process|fatty acid metabolic process|acyl-CoA metabolic process|palmitoyl-CoA hydrolase activity|hydrolase activity|thiolester hydrolase activity|saturated monocarboxylic acid metabolic process|unsaturated monocarboxylic acid metabolic process|acyl-CoA hydrolase activity|carboxy…			R-MMU-1430728,R-MMU-556833,R-MMU-77289,R-MMU-8978868,R-MMU-9033241,R-MMU-9609507	Metabolism|Metabolism of lipids|Mitochondrial Fatty Acid Beta-Oxidation|Fatty acid metabolism|Peroxisomal protein import|Protein localization
Acot4	97.6813	92.1291	103.233	1.12092	0.16469	0.798866	0.912096	Up	0.146723	0.820258	1.31133	0.512377	0.834465	0.456808	171282	acyl-CoA thioesterase 4	protein_coding	mmu00062,mmu01040,mmu04913	Fatty acid elongation|Biosynthesis of unsaturated fatty acids|Ovarian steroidogenesis	GO:0000038,GO:0001676,GO:0004778,GO:0005777,GO:0006104,GO:0006629,GO:0006631,GO:0006637,GO:0016787,GO:0016790,GO:0032788,GO:0032789,GO:0043648,GO:0043649,GO:0044466,GO:0046459,GO:0047617,GO:0052689	very long-chain fatty acid metabolic process|long-chain fatty acid metabolic process|succinyl-CoA hydrolase activity|peroxisome|succinyl-CoA metabolic process|lipid metabolic process|fatty acid metabolic process|acyl-CoA metabolic process|hydrolase activity|thiolester hydrolase activity|saturated monocarboxylic acid metabolic process|unsaturated monocarboxylic acid metabolic process|dicarboxylic …			R-MMU-1430728,R-MMU-390247,R-MMU-390918,R-MMU-556833,R-MMU-8978868,R-MMU-9033241,R-MMU-9609507	Metabolism|Beta-oxidation of very long chain fatty acids|Peroxisomal lipid metabolism|Metabolism of lipids|Fatty acid metabolism|Peroxisomal protein import|Protein localization
Acot6	64.9289	80.0618	49.796	0.623202	-0.682229	0.135832	0.372844	Down	0.288377	0.515723	0.453555	0.504601	0.882496	0.404705	217700	acyl-CoA thioesterase 6	protein_coding			GO:0005777,GO:0005829,GO:0006629,GO:0006631,GO:0006637,GO:0016787,GO:0016790,GO:0047617,GO:0052689	peroxisome|cytosol|lipid metabolic process|fatty acid metabolic process|acyl-CoA metabolic process|hydrolase activity|thiolester hydrolase activity|acyl-CoA hydrolase activity|carboxylic ester hydrolase activity			R-MMU-1430728,R-MMU-390247,R-MMU-390918,R-MMU-556833,R-MMU-8978868	Metabolism|Beta-oxidation of very long chain fatty acids|Peroxisomal lipid metabolism|Metabolism of lipids|Fatty acid metabolism
Acot7	490.712	330.197	651.226	1.97313	0.980484	2.75224e-12	3.11116e-10	Up	4.62353	4.23466	4.66909	1.92994	2.07973	2.11793	70025	acyl-CoA thioesterase 7	protein_coding	mmu00062,mmu01040	Fatty acid elongation|Biosynthesis of unsaturated fatty acids	GO:0000062,GO:0005654,GO:0005737,GO:0005759,GO:0005829,GO:0006629,GO:0006631,GO:0006637,GO:0009062,GO:0015937,GO:0016290,GO:0016787,GO:0016790,GO:0036042,GO:0036114,GO:0036116,GO:0042802,GO:0042803,GO:0043005,GO:0043025,GO:0047617,GO:0051792,GO:0052689,GO:0102991,GO:1900535	fatty-acyl-CoA binding|nucleoplasm|cytoplasm|mitochondrial matrix|cytosol|lipid metabolic process|fatty acid metabolic process|acyl-CoA metabolic process|fatty acid catabolic process|coenzyme A biosynthetic process|palmitoyl-CoA hydrolase activity|hydrolase activity|thiolester hydrolase activity|long-chain fatty acyl-CoA binding|medium-chain fatty-acyl-CoA catabolic process|long-chain fatty-acyl-…			R-MMU-1430728,R-MMU-556833,R-MMU-77289,R-MMU-8978868	Metabolism|Metabolism of lipids|Mitochondrial Fatty Acid Beta-Oxidation|Fatty acid metabolism
Acot8	456.216	481.653	430.779	0.894426	-0.160966	0.271066	0.55192	Down	3.91559	3.4424	3.54421	3.27569	3.579	4.06888	170789	acyl-CoA thioesterase 8	protein_coding	mmu00120,mmu04146	Primary bile acid biosynthesis|Peroxisome	GO:0003986,GO:0004778,GO:0005739,GO:0005777,GO:0005782,GO:0006629,GO:0006631,GO:0006637,GO:0007031,GO:0009062,GO:0016290,GO:0016559,GO:0016787,GO:0033882,GO:0043649,GO:0044466,GO:0045225,GO:0047603,GO:0047617,GO:0047994,GO:0052689,GO:0052815,GO:0102991	acetyl-CoA hydrolase activity|succinyl-CoA hydrolase activity|mitochondrion|peroxisome|peroxisomal matrix|lipid metabolic process|fatty acid metabolic process|acyl-CoA metabolic process|peroxisome organization|fatty acid catabolic process|palmitoyl-CoA hydrolase activity|peroxisome fission|hydrolase activity|choloyl-CoA hydrolase activity|dicarboxylic acid catabolic process|glutaryl-CoA hydrolase…			R-MMU-1430728,R-MMU-192105,R-MMU-193368,R-MMU-194068,R-MMU-2046104,R-MMU-2046106,R-MMU-389887,R-MMU-390247,R-MMU-390918,R-MMU-556833,R-MMU-8957322,R-MMU-8978868,R-MMU-9033241,R-MMU-9609507	Metabolism|Synthesis of bile acids and bile salts|Synthesis of bile acids and bile salts via 7alpha-hydroxycholesterol|Bile acid and bile salt metabolism|alpha-linolenic (omega3) and linoleic (omega6) acid metabolism|alpha-linolenic acid (ALA) metabolism|Beta-oxidation of pristanoyl-CoA|Beta-oxidation of very long chain fatty acids|Peroxisomal lipid metabolism|Metabolism of lipids|Metabolism of s…
Acot9	2553.6	2348.36	2758.85	1.17476	0.232362	0.122684	0.351488	Up	49.4944	37.4425	37.4971	29.997	28.9964	35.9059	56360	acyl-CoA thioesterase 9	protein_coding			GO:0001676,GO:0003986,GO:0005515,GO:0005739,GO:0005759,GO:0006637,GO:0016290,GO:0016787,GO:0046459,GO:0047617,GO:0052689,GO:0102991	long-chain fatty acid metabolic process|acetyl-CoA hydrolase activity|protein binding|mitochondrion|mitochondrial matrix|acyl-CoA metabolic process|palmitoyl-CoA hydrolase activity|hydrolase activity|short-chain fatty acid metabolic process|acyl-CoA hydrolase activity|carboxylic ester hydrolase activity|myristoyl-CoA hydrolase activity			R-MMU-1430728,R-MMU-556833,R-MMU-77289,R-MMU-8978868	Metabolism|Metabolism of lipids|Mitochondrial Fatty Acid Beta-Oxidation|Fatty acid metabolism
Acox1	6084.24	6500.96	5667.52	0.871855	-0.197839	0.0733834	0.254353	Down	40.1047	40.0484	41.3617	37.9863	43.8379	42.7689	11430	acyl-Coenzyme A oxidase 1%2C palmitoyl	protein_coding	mmu00640,mmu00071,mmu00592,mmu01040,mmu00410,mmu04024,mmu04146,mmu03320,mmu04936	Propanoate metabolism|Fatty acid degradation|alpha-Linolenic acid metabolism|Biosynthesis of unsaturated fatty acids|beta-Alanine metabolism|cAMP signaling pathway|Peroxisome|PPAR signaling pathway|Alcoholic liver disease	GO:0000038,GO:0003997,GO:0005504,GO:0005737,GO:0005739,GO:0005777,GO:0005778,GO:0005829,GO:0006091,GO:0006629,GO:0006631,GO:0006635,GO:0006693,GO:0007283,GO:0009062,GO:0016401,GO:0016491,GO:0016559,GO:0016627,GO:0019395,GO:0030165,GO:0033540,GO:0042632,GO:0042803,GO:0050660,GO:0050665,GO:0055088,GO:0071949,GO:0140493	very long-chain fatty acid metabolic process|acyl-CoA oxidase activity|fatty acid binding|cytoplasm|mitochondrion|peroxisome|peroxisomal membrane|cytosol|generation of precursor metabolites and energy|lipid metabolic process|fatty acid metabolic process|fatty acid beta-oxidation|prostaglandin metabolic process|spermatogenesis|fatty acid catabolic process|palmitoyl-CoA oxidase activity|oxidoreduct…	WP4350,WP4347,WP4348,WP2316	Omega-3 / omega-6 fatty acid synthesis|Eicosanoid metabolism via cyclooxygenases (COX)|Eicosanoid metabolism via lipoxygenases (LOX)|PPAR signaling pathway	R-MMU-1430728,R-MMU-2046104,R-MMU-2046106,R-MMU-390247,R-MMU-390918,R-MMU-556833,R-MMU-8978868,R-MMU-9033241,R-MMU-9609507	Metabolism|alpha-linolenic (omega3) and linoleic (omega6) acid metabolism|alpha-linolenic acid (ALA) metabolism|Beta-oxidation of very long chain fatty acids|Peroxisomal lipid metabolism|Metabolism of lipids|Fatty acid metabolism|Peroxisomal protein import|Protein localization
Acox2	1089.99	1420.62	759.359	0.534527	-0.903666	0.329653	0.610678	Down	0.907958	7.92862	10.5657	9.71793	14.7988	7.70153	93732	acyl-Coenzyme A oxidase 2%2C branched chain	protein_coding	mmu00120,mmu04146,mmu03320	Primary bile acid biosynthesis|Peroxisome|PPAR signaling pathway	GO:0000038,GO:0003997,GO:0005504,GO:0005777,GO:0005829,GO:0006629,GO:0006631,GO:0006635,GO:0006699,GO:0016401,GO:0016491,GO:0016627,GO:0033540,GO:0033791,GO:0043231,GO:0050660,GO:0055088,GO:0071949	very long-chain fatty acid metabolic process|acyl-CoA oxidase activity|fatty acid binding|peroxisome|cytosol|lipid metabolic process|fatty acid metabolic process|fatty acid beta-oxidation|bile acid biosynthetic process|palmitoyl-CoA oxidase activity|oxidoreductase activity|oxidoreductase activity, acting on the CH-CH group of donors|fatty acid beta-oxidation using acyl-CoA oxidase|3alpha,7alpha,1…	WP4347,WP4348,WP2316	Eicosanoid metabolism via cyclooxygenases (COX)|Eicosanoid metabolism via lipoxygenases (LOX)|PPAR signaling pathway	R-MMU-1430728,R-MMU-192105,R-MMU-193368,R-MMU-194068,R-MMU-389887,R-MMU-390918,R-MMU-556833,R-MMU-8957322,R-MMU-8978868,R-MMU-9033241,R-MMU-9609507	Metabolism|Synthesis of bile acids and bile salts|Synthesis of bile acids and bile salts via 7alpha-hydroxycholesterol|Bile acid and bile salt metabolism|Beta-oxidation of pristanoyl-CoA|Peroxisomal lipid metabolism|Metabolism of lipids|Metabolism of steroids|Fatty acid metabolism|Peroxisomal protein import|Protein localization
Acox3	1289.36	1172.62	1406.11	1.19908	0.261932	0.151126	0.396145	Up	5.56891	4.32758	5.18995	2.85012	3.89799	4.55146	80911	acyl-Coenzyme A oxidase 3%2C pristanoyl	protein_coding	mmu00640,mmu00071,mmu00592,mmu01040,mmu00410,mmu04024,mmu04146,mmu03320,mmu04936	Propanoate metabolism|Fatty acid degradation|alpha-Linolenic acid metabolism|Biosynthesis of unsaturated fatty acids|beta-Alanine metabolism|cAMP signaling pathway|Peroxisome|PPAR signaling pathway|Alcoholic liver disease	GO:0003997,GO:0005504,GO:0005739,GO:0005777,GO:0005782,GO:0006629,GO:0006631,GO:0006635,GO:0016402,GO:0016491,GO:0016627,GO:0033540,GO:0050660,GO:0055088,GO:0071949	acyl-CoA oxidase activity|fatty acid binding|mitochondrion|peroxisome|peroxisomal matrix|lipid metabolic process|fatty acid metabolic process|fatty acid beta-oxidation|pristanoyl-CoA oxidase activity|oxidoreductase activity|oxidoreductase activity, acting on the CH-CH group of donors|fatty acid beta-oxidation using acyl-CoA oxidase|flavin adenine dinucleotide binding|lipid homeostasis|FAD binding	WP4350,WP4347,WP4348,WP2316	Omega-3 / omega-6 fatty acid synthesis|Eicosanoid metabolism via cyclooxygenases (COX)|Eicosanoid metabolism via lipoxygenases (LOX)|PPAR signaling pathway	R-MMU-1430728,R-MMU-389887,R-MMU-390918,R-MMU-556833,R-MMU-8978868,R-MMU-9033241,R-MMU-9609507	Metabolism|Beta-oxidation of pristanoyl-CoA|Peroxisomal lipid metabolism|Metabolism of lipids|Fatty acid metabolism|Peroxisomal protein import|Protein localization
Acp1	861.266	866.801	855.731	0.987042	-0.0188162	0.892321	0.956157	Down	7.35636	7.67603	7.06269	6.0643	6.17028	7.89402	11431	acid phosphatase 1%2C soluble	protein_coding	mmu00730,mmu00740,mmu04520,mmu05208	Thiamine metabolism|Riboflavin metabolism|Adherens junction|Chemical carcinogenesis - reactive oxygen species	GO:0003993,GO:0004721,GO:0004725,GO:0004726,GO:0005737,GO:0005829,GO:0006470,GO:0009898,GO:0016787,GO:0016791,GO:0017124,GO:0042383	acid phosphatase activity|phosphoprotein phosphatase activity|protein tyrosine phosphatase activity|non-membrane spanning protein tyrosine phosphatase activity|cytoplasm|cytosol|protein dephosphorylation|cytoplasmic side of plasma membrane|hydrolase activity|phosphatase activity|SH3 domain binding|sarcolemma
Acp2	2185.25	2128.9	2241.59	1.05303	0.0745487	0.541256	0.773937	Up	14.3729	12.8286	12.2709	11.3534	10.7208	11.4115	11432	acid phosphatase 2%2C lysosomal	protein_coding	mmu00740,mmu04142	Riboflavin metabolism|Lysosome	GO:0001501,GO:0001784,GO:0003993,GO:0004721,GO:0005764,GO:0007040,GO:0010033,GO:0016020,GO:0016311,GO:0016787,GO:0048102	skeletal system development|phosphotyrosine residue binding|acid phosphatase activity|phosphoprotein phosphatase activity|lysosome|lysosome organization|response to organic substance|membrane|dephosphorylation|hydrolase activity|autophagic cell death
Acp5	1163.54	993.46	1333.61	1.34288	0.425332	0.0636251	0.231616	Up	11.1129	13.6338	13.7489	8.30192	10.5017	6.63057	11433	acid phosphatase 5%2C tartrate resistant	protein_coding	mmu00740,mmu04142,mmu04380,mmu05323	Riboflavin metabolism|Lysosome|Osteoclast differentiation|Rheumatoid arthritis	GO:0003993,GO:0005615,GO:0005764,GO:0006809,GO:0007162,GO:0008198,GO:0008199,GO:0010934,GO:0010936,GO:0016311,GO:0016787,GO:0030335,GO:0032496,GO:0032611,GO:0032615,GO:0032640,GO:0032691,GO:0032695,GO:0032720,GO:0032929,GO:0034097,GO:0042554,GO:0045019,GO:0045453,GO:0046872,GO:0050728,GO:0050830,GO:0060349	acid phosphatase activity|extracellular space|lysosome|nitric oxide biosynthetic process|negative regulation of cell adhesion|ferrous iron binding|ferric iron binding|macrophage cytokine production|negative regulation of macrophage cytokine production|dephosphorylation|hydrolase activity|positive regulation of cell migration|response to lipopolysaccharide|interleukin-1 beta production|interleukin…	WP454	Osteoclast signaling	R-MMU-1430728,R-MMU-196843,R-MMU-196849,R-MMU-196854	Metabolism|Vitamin B2 (riboflavin) metabolism|Metabolism of water-soluble vitamins and cofactors|Metabolism of vitamins and cofactors
Acp6	570.497	559.235	581.759	1.03985	0.0563709	0.751473	0.887958	Up	9.73459	9.24488	8.58954	6.75867	7.00053	10.1478	66659	acid phosphatase 6%2C lysophosphatidic	protein_coding			GO:0002244,GO:0003993,GO:0005737,GO:0005739,GO:0006629,GO:0006644,GO:0016311,GO:0016787,GO:0052642,GO:2001311	hematopoietic progenitor cell differentiation|acid phosphatase activity|cytoplasm|mitochondrion|lipid metabolic process|phospholipid metabolic process|dephosphorylation|hydrolase activity|lysophosphatidic acid phosphatase activity|lysobisphosphatidic acid metabolic process			R-MMU-1430728,R-MMU-1483166,R-MMU-1483206,R-MMU-1483257,R-MMU-556833	Metabolism|Synthesis of PA|Glycerophospholipid biosynthesis|Phospholipid metabolism|Metabolism of lipids
Acp7	292.888	429.019	156.758	0.365668	-1.45139	2.6097e-07	9.41504e-06	Down	1.00525	0.677834	0.755817	1.65974	2.60015	1.65162	101744	acid phosphatase 7%2C tartrate resistant	protein_coding			GO:0003674,GO:0003993,GO:0005575,GO:0005576,GO:0008150,GO:0016787,GO:0046872	molecular_function|acid phosphatase activity|cellular_component|extracellular region|biological_process|hydrolase activity|metal ion binding
Acpp	579.064	880.557	277.571	0.31537	-1.66488	1.5982e-19	5.95805e-17	Down	1.48334	1.26647	1.12946	3.95143	3.58632	3.41994	56318	acid phosphatase%2C prostate	protein_coding			GO:0003993,GO:0004725,GO:0005576,GO:0005615,GO:0005764,GO:0005771,GO:0005886,GO:0006144,GO:0006629,GO:0006772,GO:0007040,GO:0008253,GO:0009117,GO:0012506,GO:0016020,GO:0016311,GO:0016787,GO:0016791,GO:0030141,GO:0030175,GO:0031985,GO:0033265,GO:0042131,GO:0042802,GO:0042803,GO:0045177,GO:0046085,GO:0051930,GO:0052642,GO:0060090,GO:0060168,GO:0106411	acid phosphatase activity|protein tyrosine phosphatase activity|extracellular region|extracellular space|lysosome|multivesicular body|plasma membrane|purine nucleobase metabolic process|lipid metabolic process|thiamine metabolic process|lysosome organization|5'-nucleotidase activity|nucleotide metabolic process|vesicle membrane|membrane|dephosphorylation|hydrolase activity|phosphatase activity|se…			R-MMU-168249,R-MMU-168256,R-MMU-6798695	Innate Immune System|Immune System|Neutrophil degranulation
Acrbp	63.1055	57.7095	68.5015	1.18379	0.24341	0.547709	0.778283	Up	0.866845	0.589526	1.20334	0.665774	0.46511	0.88291	54137	proacrosin binding protein	protein_coding			GO:0001669,GO:0001675,GO:0005515,GO:0005576,GO:0007286,GO:0009566,GO:0016504	acrosomal vesicle|acrosome assembly|protein binding|extracellular region|spermatid development|fertilization|peptidase activator activity
Acsbg1	147.03	190.87	103.191	0.540959	-0.886409	0.00174527	0.0164639	Down	1.02856	0.619703	0.906894	1.38463	1.57247	1.22733	94180	acyl-CoA synthetase bubblegum family member 1	protein_coding	mmu00061,mmu00071,mmu04920,mmu03320	Fatty acid biosynthesis|Fatty acid degradation|Adipocytokine signaling pathway|PPAR signaling pathway	GO:0000038,GO:0000166,GO:0001676,GO:0004467,GO:0005524,GO:0005737,GO:0005777,GO:0005783,GO:0005794,GO:0005886,GO:0006629,GO:0006631,GO:0016020,GO:0016874,GO:0031410,GO:0031957,GO:0042759,GO:0043231,GO:0051384	very long-chain fatty acid metabolic process|nucleotide binding|long-chain fatty acid metabolic process|long-chain fatty acid-CoA ligase activity|ATP binding|cytoplasm|peroxisome|endoplasmic reticulum|Golgi apparatus|plasma membrane|lipid metabolic process|fatty acid metabolic process|membrane|ligase activity|cytoplasmic vesicle|very long-chain fatty acid-CoA ligase activity|long-chain fatty acid…	WP2316	PPAR signaling pathway	R-MMU-1430728,R-MMU-556833,R-MMU-75105,R-MMU-75876,R-MMU-8978868	Metabolism|Metabolism of lipids|Fatty acyl-CoA biosynthesis|Synthesis of very long-chain fatty acyl-CoAs|Fatty acid metabolism
Acsf2	751.543	632.616	870.47	1.37565	0.460115	0.0107488	0.0667648	Up	6.5296	8.14545	8.91296	4.45526	4.89661	6.06944	264895	acyl-CoA synthetase family member 2	protein_coding			GO:0000166,GO:0005524,GO:0005739,GO:0006629,GO:0006631,GO:0016874,GO:0031956,GO:0047760	nucleotide binding|ATP binding|mitochondrion|lipid metabolic process|fatty acid metabolic process|ligase activity|medium-chain fatty acid-CoA ligase activity|butyrate-CoA ligase activity			R-MMU-1430728,R-MMU-556833,R-MMU-77289,R-MMU-8978868	Metabolism|Metabolism of lipids|Mitochondrial Fatty Acid Beta-Oxidation|Fatty acid metabolism
Acsf3	285.812	255.355	316.269	1.23772	0.307685	0.169998	0.425071	Up	2.7855	3.39353	4.0696	2.09897	2.30913	3.04345	257633	acyl-CoA synthetase family member 3	protein_coding	mmu00061,mmu00280	Fatty acid biosynthesis|Valine, leucine and isoleucine degradation	GO:0000166,GO:0005524,GO:0005654,GO:0005739,GO:0006629,GO:0006631,GO:0006633,GO:0016874,GO:0016878,GO:0031957,GO:0090409,GO:0090410	nucleotide binding|ATP binding|nucleoplasm|mitochondrion|lipid metabolic process|fatty acid metabolic process|fatty acid biosynthetic process|ligase activity|acid-thiol ligase activity|very long-chain fatty acid-CoA ligase activity|malonyl-CoA synthetase activity|malonate catabolic process			R-MMU-1430728,R-MMU-556833,R-MMU-75105,R-MMU-75876,R-MMU-8978868	Metabolism|Metabolism of lipids|Fatty acyl-CoA biosynthesis|Synthesis of very long-chain fatty acyl-CoAs|Fatty acid metabolism
Acsl1	1809.5	2036.38	1582.62	0.777215	-0.363614	0.241984	0.517697	Down	3.46159	7.2095	7.99993	6.34392	8.80626	6.26949	14081	acyl-CoA synthetase long-chain family member 1	protein_coding	mmu00061,mmu00071,mmu04146,mmu04216,mmu04920,mmu03320,mmu04714	Fatty acid biosynthesis|Fatty acid degradation|Peroxisome|Ferroptosis|Adipocytokine signaling pathway|PPAR signaling pathway|Thermogenesis	GO:0000038,GO:0000166,GO:0001676,GO:0004467,GO:0005524,GO:0005739,GO:0005741,GO:0005777,GO:0005778,GO:0005783,GO:0006629,GO:0006631,GO:0008610,GO:0010033,GO:0010747,GO:0015908,GO:0016020,GO:0016874,GO:0019432,GO:0033211,GO:0035338,GO:0042178,GO:0043231,GO:0043539,GO:0043758,GO:0044539,GO:0047676,GO:0050197,GO:0090434,GO:0120162	very long-chain fatty acid metabolic process|nucleotide binding|long-chain fatty acid metabolic process|long-chain fatty acid-CoA ligase activity|ATP binding|mitochondrion|mitochondrial outer membrane|peroxisome|peroxisomal membrane|endoplasmic reticulum|lipid metabolic process|fatty acid metabolic process|lipid biosynthetic process|response to organic substance|positive regulation of long-chain …	WP4350,WP4351,WP401,WP336,WP4346,WP1269,WP2316	Omega-3 / omega-6 fatty acid synthesis|Omega-9 fatty acid synthesis|Mitochondrial long chain fatty acid beta-oxidation|Fatty acid biosynthesis|Cholesterol metabolism with Bloch and Kandutsch-Russell pathways|Fatty acid beta-oxidation|PPAR signaling pathway	R-MMU-1430728,R-MMU-2046104,R-MMU-2046105,R-MMU-2046106,R-MMU-556833,R-MMU-75105,R-MMU-75876,R-MMU-8978868	Metabolism|alpha-linolenic (omega3) and linoleic (omega6) acid metabolism|Linoleic acid (LA) metabolism|alpha-linolenic acid (ALA) metabolism|Metabolism of lipids|Fatty acyl-CoA biosynthesis|Synthesis of very long-chain fatty acyl-CoAs|Fatty acid metabolism
Acsl3	2678.25	2800.09	2556.4	0.912861	-0.131533	0.449275	0.712265	Down	19.2935	14.3082	15.5154	15.0176	13.2203	20.1452	74205	acyl-CoA synthetase long-chain family member 3	protein_coding	mmu00061,mmu00071,mmu04146,mmu04216,mmu04920,mmu03320,mmu04714	Fatty acid biosynthesis|Fatty acid degradation|Peroxisome|Ferroptosis|Adipocytokine signaling pathway|PPAR signaling pathway|Thermogenesis	GO:0000166,GO:0001676,GO:0004467,GO:0005524,GO:0005739,GO:0005741,GO:0005777,GO:0005783,GO:0005794,GO:0005811,GO:0005886,GO:0006629,GO:0006631,GO:0006633,GO:0016020,GO:0016874,GO:0019901,GO:0019904,GO:0030182,GO:0031956,GO:0034379,GO:0035336,GO:0042998,GO:0043231,GO:0044539,GO:0047676,GO:0047760,GO:0048471,GO:0051047,GO:2001247	nucleotide binding|long-chain fatty acid metabolic process|long-chain fatty acid-CoA ligase activity|ATP binding|mitochondrion|mitochondrial outer membrane|peroxisome|endoplasmic reticulum|Golgi apparatus|lipid droplet|plasma membrane|lipid metabolic process|fatty acid metabolic process|fatty acid biosynthetic process|membrane|ligase activity|protein kinase binding|protein domain specific binding…	WP4350,WP4351,WP401,WP336,WP4346,WP1269,WP2316	Omega-3 / omega-6 fatty acid synthesis|Omega-9 fatty acid synthesis|Mitochondrial long chain fatty acid beta-oxidation|Fatty acid biosynthesis|Cholesterol metabolism with Bloch and Kandutsch-Russell pathways|Fatty acid beta-oxidation|PPAR signaling pathway	R-MMU-1430728,R-MMU-163685,R-MMU-400451,R-MMU-422356,R-MMU-434313,R-MMU-556833,R-MMU-75105,R-MMU-75876,R-MMU-8978868	Metabolism|Integration of energy metabolism|Free fatty acids regulate insulin secretion|Regulation of insulin secretion|Intracellular metabolism of fatty acids regulates insulin secretion|Metabolism of lipids|Fatty acyl-CoA biosynthesis|Synthesis of very long-chain fatty acyl-CoAs|Fatty acid metabolism
Acsl4	3833.19	3440.75	4225.62	1.22799	0.296298	0.0434547	0.179606	Up	24.1309	18.3878	21.0302	15.4194	13.0966	17.8534	50790	acyl-CoA synthetase long-chain family member 4	protein_coding	mmu00061,mmu00071,mmu04146,mmu04216,mmu04920,mmu03320,mmu04714	Fatty acid biosynthesis|Fatty acid degradation|Peroxisome|Ferroptosis|Adipocytokine signaling pathway|PPAR signaling pathway|Thermogenesis	GO:0000166,GO:0001676,GO:0004467,GO:0005524,GO:0005737,GO:0005739,GO:0005741,GO:0005777,GO:0005783,GO:0005811,GO:0005886,GO:0006629,GO:0006631,GO:0008610,GO:0015908,GO:0016020,GO:0016874,GO:0019217,GO:0019432,GO:0030182,GO:0030307,GO:0031957,GO:0031966,GO:0032024,GO:0032307,GO:0035336,GO:0035338,GO:0043025,GO:0043231,GO:0044233,GO:0047676,GO:0060136,GO:0060996	nucleotide binding|long-chain fatty acid metabolic process|long-chain fatty acid-CoA ligase activity|ATP binding|cytoplasm|mitochondrion|mitochondrial outer membrane|peroxisome|endoplasmic reticulum|lipid droplet|plasma membrane|lipid metabolic process|fatty acid metabolic process|lipid biosynthetic process|fatty acid transport|membrane|ligase activity|regulation of fatty acid metabolic process|t…	WP4350,WP4351,WP401,WP336,WP4346,WP1269,WP2316	Omega-3 / omega-6 fatty acid synthesis|Omega-9 fatty acid synthesis|Mitochondrial long chain fatty acid beta-oxidation|Fatty acid biosynthesis|Cholesterol metabolism with Bloch and Kandutsch-Russell pathways|Fatty acid beta-oxidation|PPAR signaling pathway	R-MMU-1430728,R-MMU-163685,R-MMU-400451,R-MMU-422356,R-MMU-434313,R-MMU-556833,R-MMU-75105,R-MMU-75876,R-MMU-8978868	Metabolism|Integration of energy metabolism|Free fatty acids regulate insulin secretion|Regulation of insulin secretion|Intracellular metabolism of fatty acids regulates insulin secretion|Metabolism of lipids|Fatty acyl-CoA biosynthesis|Synthesis of very long-chain fatty acyl-CoAs|Fatty acid metabolism
Acsl5	2101.39	2086.5	2116.29	1.01429	0.0204672	0.902515	0.960586	Up	14.1583	19.6332	18.4869	14.4955	15.1976	16.5517	433256	acyl-CoA synthetase long-chain family member 5	protein_coding	mmu00061,mmu00071,mmu04146,mmu04216,mmu04920,mmu03320,mmu04714	Fatty acid biosynthesis|Fatty acid degradation|Peroxisome|Ferroptosis|Adipocytokine signaling pathway|PPAR signaling pathway|Thermogenesis	GO:0000166,GO:0001676,GO:0004467,GO:0005524,GO:0005654,GO:0005730,GO:0005739,GO:0005741,GO:0005743,GO:0005783,GO:0005886,GO:0006629,GO:0006631,GO:0008654,GO:0010747,GO:0010867,GO:0015908,GO:0016020,GO:0016874,GO:0032000,GO:0035338,GO:0047676,GO:2001236	nucleotide binding|long-chain fatty acid metabolic process|long-chain fatty acid-CoA ligase activity|ATP binding|nucleoplasm|nucleolus|mitochondrion|mitochondrial outer membrane|mitochondrial inner membrane|endoplasmic reticulum|plasma membrane|lipid metabolic process|fatty acid metabolic process|phospholipid biosynthetic process|positive regulation of long-chain fatty acid import across plasma m…	WP336,WP1269,WP2316	Fatty acid biosynthesis|Fatty acid beta-oxidation|PPAR signaling pathway	R-MMU-1430728,R-MMU-556833,R-MMU-75105,R-MMU-75876,R-MMU-8978868	Metabolism|Metabolism of lipids|Fatty acyl-CoA biosynthesis|Synthesis of very long-chain fatty acyl-CoAs|Fatty acid metabolism
Acsl6	3.54852	1.8013	5.29573	2.98577	1.5781	0.243745	0.520206	Up	0.0260675	0.0282059	0.00780925	0.0035012	0.0115025	0.00368903	216739	acyl-CoA synthetase long-chain family member 6	protein_coding	mmu00061,mmu00071,mmu04146,mmu04216,mmu04920,mmu03320,mmu04714	Fatty acid biosynthesis|Fatty acid degradation|Peroxisome|Ferroptosis|Adipocytokine signaling pathway|PPAR signaling pathway|Thermogenesis	GO:0000038,GO:0000166,GO:0001676,GO:0004467,GO:0005515,GO:0005524,GO:0005739,GO:0005741,GO:0005777,GO:0005783,GO:0006629,GO:0006631,GO:0007405,GO:0008654,GO:0010747,GO:0010976,GO:0015908,GO:0016020,GO:0016874,GO:0019432,GO:0019899,GO:0035338,GO:0042803,GO:0043231,GO:0047676	very long-chain fatty acid metabolic process|nucleotide binding|long-chain fatty acid metabolic process|long-chain fatty acid-CoA ligase activity|protein binding|ATP binding|mitochondrion|mitochondrial outer membrane|peroxisome|endoplasmic reticulum|lipid metabolic process|fatty acid metabolic process|neuroblast proliferation|phospholipid biosynthetic process|positive regulation of long-chain fat…	WP336,WP1269,WP2316	Fatty acid biosynthesis|Fatty acid beta-oxidation|PPAR signaling pathway	R-MMU-1430728,R-MMU-556833,R-MMU-75105,R-MMU-75876,R-MMU-8978868	Metabolism|Metabolism of lipids|Fatty acyl-CoA biosynthesis|Synthesis of very long-chain fatty acyl-CoAs|Fatty acid metabolism
Acsm1	404.799	535.056	274.543	0.513107	-0.96267	0.406522	0.678075	Down	0.212184	3.73423	6.8838	5.90266	8.95711	3.74643	117147	acyl-CoA synthetase medium-chain family member 1	protein_coding	mmu00650,mmu00785	Butanoate metabolism|Lipoic acid metabolism	GO:0000166,GO:0004321,GO:0004467,GO:0005524,GO:0005525,GO:0005739,GO:0005759,GO:0006629,GO:0006631,GO:0006633,GO:0006637,GO:0015645,GO:0016874,GO:0018858,GO:0031956,GO:0046872,GO:0047760,GO:0102391	nucleotide binding|fatty-acyl-CoA synthase activity|long-chain fatty acid-CoA ligase activity|ATP binding|GTP binding|mitochondrion|mitochondrial matrix|lipid metabolic process|fatty acid metabolic process|fatty acid biosynthetic process|acyl-CoA metabolic process|fatty acid ligase activity|ligase activity|benzoate-CoA ligase activity|medium-chain fatty acid-CoA ligase activity|metal ion binding|…			R-MMU-1430728,R-MMU-156580,R-MMU-156587,R-MMU-159424,R-MMU-177135,R-MMU-177162,R-MMU-211859	Metabolism|Phase II - Conjugation of compounds|Amino Acid conjugation|Conjugation of carboxylic acids|Conjugation of benzoate with glycine|Conjugation of phenylacetate with glutamine|Biological oxidations
Acsm3	36.2378	39.4883	32.9874	0.83662	-0.257355	0.703629	0.865076	Down	0.51678	0.271821	0.0688072	0.23908	0.346274	0.333165	20216	acyl-CoA synthetase medium-chain family member 3	protein_coding	mmu00650	Butanoate metabolism	GO:0000166,GO:0004321,GO:0005524,GO:0005739,GO:0005759,GO:0006629,GO:0006631,GO:0006633,GO:0006637,GO:0015645,GO:0016874,GO:0018729,GO:0031956,GO:0046872,GO:0047760,GO:0050218	nucleotide binding|fatty-acyl-CoA synthase activity|ATP binding|mitochondrion|mitochondrial matrix|lipid metabolic process|fatty acid metabolic process|fatty acid biosynthetic process|acyl-CoA metabolic process|fatty acid ligase activity|ligase activity|propionate CoA-transferase activity|medium-chain fatty acid-CoA ligase activity|metal ion binding|butyrate-CoA ligase activity|propionate-CoA lig…
Acsm4	1.83945	2.41969	1.25921	0.519907	-0.943676	0.595928	0.807218	Down	0.0366443	0	0.0128075	0.0229684	0.0251528	0.0363008	233801	acyl-CoA synthetase medium-chain family member 4	protein_coding	mmu00650	Butanoate metabolism	GO:0000166,GO:0004321,GO:0005524,GO:0005739,GO:0005759,GO:0006629,GO:0006631,GO:0006633,GO:0006637,GO:0015645,GO:0016874,GO:0031956,GO:0046872,GO:0047760,GO:0102391	nucleotide binding|fatty-acyl-CoA synthase activity|ATP binding|mitochondrion|mitochondrial matrix|lipid metabolic process|fatty acid metabolic process|fatty acid biosynthetic process|acyl-CoA metabolic process|fatty acid ligase activity|ligase activity|medium-chain fatty acid-CoA ligase activity|metal ion binding|butyrate-CoA ligase activity|decanoate-CoA ligase activity			R-MMU-1430728,R-MMU-156580,R-MMU-156587,R-MMU-159424,R-MMU-177128,R-MMU-211859,R-MMU-9748784,R-MMU-9749641	Metabolism|Phase II - Conjugation of compounds|Amino Acid conjugation|Conjugation of carboxylic acids|Conjugation of salicylate with glycine|Biological oxidations|Drug ADME|Aspirin ADME
Acss1	981.453	798.279	1164.63	1.45913	0.545106	0.104008	0.317817	Up	4.81858	9.29656	12.6844	4.89993	6.79734	4.63642	68738	acyl-CoA synthetase short-chain family member 1	protein_coding	mmu00010,mmu00620,mmu00630,mmu00640	Glycolysis / Gluconeogenesis|Pyruvate metabolism|Glyoxylate and dicarboxylate metabolism|Propanoate metabolism	GO:0000166,GO:0003987,GO:0005524,GO:0005739,GO:0005759,GO:0006085,GO:0006629,GO:0016208,GO:0016874,GO:0019413,GO:0019427,GO:0019542,GO:0050218	nucleotide binding|acetate-CoA ligase activity|ATP binding|mitochondrion|mitochondrial matrix|acetyl-CoA biosynthetic process|lipid metabolic process|AMP binding|ligase activity|acetate biosynthetic process|acetyl-CoA biosynthetic process from acetate|propionate biosynthetic process|propionate-CoA ligase activity	WP662	Amino acid metabolism	R-MMU-1430728,R-MMU-211859,R-MMU-211945,R-MMU-71384	Metabolism|Biological oxidations|Phase I - Functionalization of compounds|Ethanol oxidation
Acss2	525.433	510.309	540.557	1.05889	0.0825523	0.806535	0.915188	Up	6.6651	4.92175	4.31186	2.74921	3.45033	7.51303	60525	acyl-CoA synthetase short-chain family member 2	protein_coding	mmu00010,mmu00620,mmu00630,mmu00640	Glycolysis / Gluconeogenesis|Pyruvate metabolism|Glyoxylate and dicarboxylate metabolism|Propanoate metabolism	GO:0000166,GO:0003987,GO:0005524,GO:0005737,GO:0005829,GO:0006085,GO:0006629,GO:0008610,GO:0016874,GO:0019413,GO:0019542,GO:0050218	nucleotide binding|acetate-CoA ligase activity|ATP binding|cytoplasm|cytosol|acetyl-CoA biosynthetic process|lipid metabolic process|lipid biosynthetic process|ligase activity|acetate biosynthetic process|propionate biosynthetic process|propionate-CoA ligase activity	WP336,WP1269,WP1252	Fatty acid biosynthesis|Fatty acid beta-oxidation|Amino acid conjugation of benzoic acid	R-MMU-1430728,R-MMU-1592230,R-MMU-1852241,R-MMU-211859,R-MMU-211945,R-MMU-2151201,R-MMU-71384	Metabolism|Mitochondrial biogenesis|Organelle biogenesis and maintenance|Biological oxidations|Phase I - Functionalization of compounds|Transcriptional activation of mitochondrial biogenesis|Ethanol oxidation
[truncated: 19,201 more rows]
