# Supplementary material for: Pre-conditioning with PQQ during pregnancy alleviates LPS-induced placental damage and improves the fetal survival and growth in mice
Source: Front Endocrinol (Lausanne). 2025 Jul 10;16:1617026. doi: 10.3389/fendo.2025.1617026 (PMC12286791; doi:10.3389/fendo.2025.1617026)
Supplement: Supplementary file 4 [file Table3.xlsx]

## Sheet: Sheet1
gene_id	BaseMean_DESeq2	BaseMean_control_Rescue	BaseMean_case_Control	FoldChange	log2FoldChange	p-value	q-value	Regulation	FPKM_C1	FPKM_C2	FPKM_C3	FPKM_P1	FPKM_P2	FPKM_P3	gene_Dbxref	description	coding_type	pathway	pathway_description	GO_ID	GO_term	wiki_ID	wiki_term	Reactome_ID	Reactome_term	TF_family
0610005C13Rik	65.0589	56.1959	73.9218	1.31579	0.395929	0.387552	0.874161	Up	1.84669	0.936705	2.77834	0.903515	1.68929	1.71822	71661	RIKEN cDNA 0610005C13 gene	non_coding			GO:0003674,GO:0005575,GO:0008150	molecular_function|cellular_component|biological_process
0610009B22Rik	442.901	481.17	404.632	0.840852	-0.250077	0.145987	0.683393	Down	8.67078	7.21338	9.14392	8.98943	10.0226	11.1678	66050	RIKEN cDNA 0610009B22 gene	protein_coding			GO:0001222,GO:0005634,GO:0005640,GO:0005654,GO:0005737,GO:0005783,GO:0006888,GO:0030008,GO:0043231,GO:0044325,GO:0048471,GO:0140416	transcription corepressor binding|nucleus|nuclear outer membrane|nucleoplasm|cytoplasm|endoplasmic reticulum|endoplasmic reticulum to Golgi vesicle-mediated transport|TRAPP complex|intracellular membrane-bounded organelle|transmembrane transporter binding|perinuclear region of cytoplasm|transcription regulator inhibitor activity			R-MMU-199977,R-MMU-199991,R-MMU-204005,R-MMU-392499,R-MMU-446203,R-MMU-5653656,R-MMU-597592,R-MMU-8876198,R-MMU-9007101,R-MMU-948021	ER to Golgi Anterograde Transport|Membrane Trafficking|COPII-mediated vesicle transport|Metabolism of proteins|Asparagine N-linked glycosylation|Vesicle-mediated transport|Post-translational protein modification|RAB GEFs exchange GTP for GDP on RABs|Rab regulation of trafficking|Transport to the Golgi and subsequent modification
0610009E02Rik	14.2184	15.7612	12.6756	0.801611	-0.319025	0.652609	0.951512	Down	0.251501	0.294393	0.13583	0.376769	0.120342	0.3639	100125929	RIKEN cDNA 0610009E02 gene	non_coding			GO:0003674,GO:0005575,GO:0008150	molecular_function|cellular_component|biological_process
0610009L18Rik	20.0027	16.0586	23.9467	1.49048	0.575776	0.335367	0.845218	Up	1.32908	0.898874	1.03683	1.15838	0.524917	0.505045	66838	RIKEN cDNA 0610009L18 gene	non_coding			GO:0003674,GO:0005575,GO:0008150	molecular_function|cellular_component|biological_process
0610010K14Rik	708.681	714.611	702.752	0.983566	-0.0239062	0.882645	0.989101	Down	18.6984	18.3703	23.5833	19.0041	21.4739	21.856	104457	RIKEN cDNA 0610010K14 gene	protein_coding	mmu03082	ATP-dependent chromatin remodeling	GO:0003674,GO:0003677,GO:0005634,GO:0005654,GO:0005829,GO:0006325,GO:0008150,GO:0016589,GO:0042802,GO:0071339	molecular_function|DNA binding|nucleus|nucleoplasm|cytosol|chromatin organization|biological_process|NURF complex|identical protein binding|MLL1 complex
0610025J13Rik	6.48116	9.33543	3.62689	0.387853	-1.36642	0.190815	0.736292	Down	0.0626961	0.0477026	0.0471631	0.267096	0.0557139	0.0804071	78687	RIKEN cDNA 0610025J13 gene	non_coding			GO:0003674,GO:0005575,GO:0008150	molecular_function|cellular_component|biological_process
0610030E20Rik	1565.42	1584.49	1546.35	0.975985	-0.0350698	0.792551	0.976053	Down	8.14209	9.05807	9.02292	7.70567	9.33819	10.1632	68364	RIKEN cDNA 0610030E20 gene	protein_coding			GO:0003674,GO:0005575,GO:0008150	molecular_function|cellular_component|biological_process
0610038B21Rik	15.5698	14.1025	17.0372	1.20654	0.270874	0.750181	0.968248	Up	0.300102	0.0405926	0.602003	0.194817	0.231123	0.376324	70345	RIKEN cDNA 0610038B21 gene	non_coding			GO:0003674,GO:0005575,GO:0008150	molecular_function|cellular_component|biological_process
0610039K10Rik	1.7458	2.05706	1.43454	0.695389	-0.524107	0.791497	0.975949	Down	0	0.0650079	0.0642728	0.103998	0	0.0821826	68386	RIKEN cDNA 0610039K10 gene	non_coding			GO:0003674,GO:0005575,GO:0008150	molecular_function|cellular_component|biological_process
0610040B10Rik	31.5619	27.6777	35.4461	1.28237	0.358813	0.383968	0.871855	Up	2.07752	2.5291	2.22267	1.85441	1.84616	1.65785	67672	RIKEN cDNA 0610040B10 gene	non_coding			GO:0003674,GO:0005575,GO:0008150	molecular_function|cellular_component|biological_process
0610040F04Rik	9.00602	10.4531	7.55892	0.725881	-0.462194	0.602135	0.941036	Down	0.0254662	0.0775042	0.166027	0.123989	0.158411	0.0870937	75394	RIKEN cDNA 0610040F04 gene	non_coding			GO:0003674,GO:0005575,GO:0008150	molecular_function|cellular_component|biological_process
0610040J01Rik	56.1953	46.2332	66.1575	1.43071	0.51673	0.176058	0.721351	Up	0.650033	0.65944	1.18172	0.48352	0.577642	0.706296	76261	RIKEN cDNA 0610040J01 gene	protein_coding			GO:0003674,GO:0008150	molecular_function|biological_process
0610043K17Rik	5.86374	8.47145	3.25603	0.384326	-1.3796	0.157081	0.699197	Down	0.147914	0.200073	0.0989052	0.520115	0.306697	0.337241	68400	RIKEN cDNA 0610043K17 gene	non_coding			GO:0003674,GO:0005575,GO:0008150	molecular_function|cellular_component|biological_process
1110002E22Rik	29.6006	39.3787	19.8225	0.504811	-0.986185	0.115789	0.626244	Down	0.0371476	0.103634	0.0310492	0.0954554	0.173306	0.0688153	102634333	RIKEN cDNA 1110002E22 gene	protein_coding			GO:0003674,GO:0005575,GO:0008150	molecular_function|cellular_component|biological_process
1110002J07Rik	4.04835	4.47262	3.62408	0.807926	-0.307704	0.815995	0.97967	Down	0.03561	0	0.0833393	0.0481602	0.0316443	0.0710414	68488	RIKEN cDNA 1110002J07 gene	non_coding			GO:0003674,GO:0005575,GO:0008150	molecular_function|cellular_component|biological_process
1110002L01Rik	736.746	826.722	646.77	0.782499	-0.353839	0.014449	0.223306	Down	5.03222	5.78884	5.7882	6.23381	7.49129	7.73662	100043040	RIKEN cDNA 1110002L01 gene	non_coding			GO:0003674,GO:0005575,GO:0008150	molecular_function|cellular_component|biological_process
1110004F10Rik	2745.21	2823.84	2666.59	0.944322	-0.082649	0.443485	0.900123	Down	39.798	41.2775	43.4742	41.2955	43.804	48.3246	56372	RIKEN cDNA 1110004F10 gene	protein_coding			GO:0003674,GO:0005575,GO:0008150	molecular_function|cellular_component|biological_process
1110006O24Rik	15.9595	12.7964	19.1227	1.49698	0.582057	0.387321	0.874143	Up	0.515774	1.12697	0.477527	0.676087	0.423077	0.305296	66123	RIKEN cDNA 1110006O24 gene	non_coding
1110017D15Rik	27.5231	33.3337	21.7124	0.649806	-0.621919	0.240625	0.780107	Down	0.260208	0.316768	0.20879	0.263935	0.300598	0.678551	73721	RIKEN cDNA 1110017D15 gene	protein_coding			GO:0002177,GO:0005634,GO:0005654,GO:0005737,GO:0005739,GO:0005829,GO:0005856,GO:0007283,GO:0030154,GO:0043014,GO:0048471,GO:0065003,GO:0097225	manchette|nucleus|nucleoplasm|cytoplasm|mitochondrion|cytosol|cytoskeleton|spermatogenesis|cell differentiation|alpha-tubulin binding|perinuclear region of cytoplasm|protein-containing complex assembly|sperm midpiece
1110018N20Rik	18.7704	10.4682	27.0727	2.5986	1.37773	0.0363623	0.361809	Up	0.0496583	0.0638108	0.13614	0.0214911	0.0470699	0.028305	68941	RIKEN cDNA 1110018N20 gene	non_coding			GO:0003674,GO:0005575,GO:0008150	molecular_function|cellular_component|biological_process
1110019D14Rik	105.004	115.775	94.2324	0.813819	-0.29722	0.303905	0.82754	Down	1.24078	1.96033	2.14218	2.19525	1.89792	2.5391	76311	RIKEN cDNA 1110019D14 gene	non_coding			GO:0003674,GO:0005575,GO:0008150	molecular_function|cellular_component|biological_process
1110020A21Rik	11.2651	11.3374	11.1928	0.990626	-0.0135877	0.984709	0.998006	Down	0.17483	0.253371	0.350708	0.182401	0.355108	0.256248	68531	RIKEN cDNA 1110020A21 gene	non_coding			GO:0003674,GO:0005575,GO:0008150	molecular_function|cellular_component|biological_process
1110025M09Rik	24.9543	22.4489	27.4597	1.22434	0.292009	0.535022	0.927456	Up	0.284263	0.439432	0.31227	0.241653	0.300721	0.312484	68635	RIKEN cDNA 1110025M09 gene	protein_coding			GO:0003674,GO:0005575,GO:0008150	molecular_function|cellular_component|biological_process
1110028F11Rik	3.75027	0.627426	6.87311	11.1942	3.48469	0.0247831	0.296663	Up	0.0563222	0.0342824	0.124281	0.00914065	0.01001	0	68690	RIKEN cDNA 1110028F11 gene	non_coding			GO:0003674,GO:0005575,GO:0008150	molecular_function|cellular_component|biological_process
1110028F18Rik	1.40639	0.30129	2.51149	7.71207	2.94712	0.235298	0.778061	Up	0	0.0691527	0.0911609	0.0184381	0	0	68692	RIKEN cDNA 1110028F18 gene	non_coding			GO:0003674,GO:0005575,GO:0008150	molecular_function|cellular_component|biological_process
1110032F04Rik	12.4955	4.57201	20.4191	4.47285	2.16119	0.0146855	0.225599	Up	0.357455	0.120876	0.130373	0.00878971	0.0673795	0.0648288	68725	RIKEN cDNA 1110032F04 gene	protein_coding			GO:0003674,GO:0005575,GO:0008150,GO:0016020	molecular_function|cellular_component|biological_process|membrane
1110038B12Rik	227.031	239.462	214.6	0.896667	-0.157356	0.485945	0.913589	Down	9.45096	8.85425	12.4837	9.89018	12.9419	11.8779	68763	RIKEN cDNA 1110038B12 gene	non_coding			GO:0003674,GO:0005575,GO:0008150	molecular_function|cellular_component|biological_process
1110038F14Rik	447.179	480.466	413.892	0.861707	-0.214731	0.180789	0.726309	Down	6.61255	7.12751	7.87595	7.45422	8.89767	9.01055	117171	RIKEN cDNA 1110038F14 gene	protein_coding			GO:0003674,GO:0005575,GO:0008150	molecular_function|cellular_component|biological_process
1110046J04Rik	63.8054	56.0189	71.5919	1.28088	0.357133	0.296285	0.821858	Up	2.19606	2.5461	3.06797	2.10023	2.40452	1.60938	68808	RIKEN cDNA 1110046J04 gene	non_coding			GO:0003674,GO:0005575,GO:0008150	molecular_function|cellular_component|biological_process
1110058D11Rik	1.79579	2.87431	0.717269	0.248886	-2.00644	0.346094	0.848936	Down	0	0.0463437	0.0458196	0.0741393	0	0.312467	68771	RIKEN cDNA 1110058D11 gene	non_coding			GO:0003674,GO:0005575,GO:0008150	molecular_function|cellular_component|biological_process
1110059E24Rik	297.126	288.795	305.457	1.05683	0.0797424	0.695991	0.959951	Up	5.73986	5.77963	6.59174	5.9909	4.45594	6.93258	66206	RIKEN cDNA 1110059E24 gene	protein_coding			GO:0003674,GO:0005575,GO:0008150	molecular_function|cellular_component|biological_process
1110059G10Rik	562.181	543.939	580.423	1.0672	0.0938337	0.5129	0.919634	Up	4.58732	4.85604	5.18303	4.12704	4.68066	5.06156	66202	RIKEN cDNA 1110059G10 gene	protein_coding			GO:0003674,GO:0005575,GO:0008150	molecular_function|cellular_component|biological_process
1110065P20Rik	341.824	348.372	335.276	0.962155	-0.0556584	0.753887	0.96859	Down	9.47426	10.5971	12.2873	11.1236	10.1153	12.7886	68920	RIKEN cDNA 1110065P20 gene	protein_coding			GO:0003674,GO:0005575,GO:0008150	molecular_function|cellular_component|biological_process
1300002E11Rik	170.235	184.768	155.703	0.842168	-0.24782	0.220345	0.770258	Down	1.13879	1.13966	1.04959	1.26749	1.21026	1.52627	100043489	RIKEN cDNA 1300002E11 gene	non_coding			GO:0003674,GO:0005575,GO:0008150	molecular_function|cellular_component|biological_process
1500002C15Rik	6.4833	4.29784	8.66877	2.02652	1.01901	0.281221	0.810334	Up	1.0559	1.98934	0.605182	0.489613	0.804266	0.515879	102636313	RIKEN cDNA 1500002C15 gene	non_coding			GO:0003674,GO:0005575,GO:0008150	molecular_function|cellular_component|biological_process
1500002F19Rik	8.02422	7.74008	8.30836	1.06954	0.0969891	0.905824	0.990571	Up	0.0341787	0.05201	0.0457083	0.0277347	0.0303724	0.0681859	76683	RIKEN cDNA 1500002F19 gene	non_coding			GO:0003674,GO:0005575,GO:0009617	molecular_function|cellular_component|response to bacterium
1500004A13Rik	8.00916	9.21786	6.80046	0.739875	-0.434647	0.72424	0.964875	Down	0	0.068749	0.0127447	0.0549913	0.0376382	0.0144853	319830	RIKEN cDNA 1500004A13 gene	non_coding			GO:0003674,GO:0005575,GO:0008150	molecular_function|cellular_component|biological_process
1500009L16Rik	440.309	575.067	305.552	0.531425	-0.912061	0.000273434	0.0170818	Down	7.39962	7.23455	4.32752	11.9364	13.5087	10.4361	69784	RIKEN cDNA 1500009L16 gene	protein_coding			GO:0003674,GO:0005575,GO:0008150	molecular_function|cellular_component|biological_process
1500011B03Rik	245.538	268.219	222.857	0.830628	-0.267725	0.137068	0.67343	Down	3.32913	3.67949	3.84877	4.42186	3.93931	4.85383	66236	RIKEN cDNA 1500011B03 gene	non_coding			GO:0003674,GO:0005575,GO:0008150	molecular_function|cellular_component|biological_process
1500015A07Rik	74.6821	84.6601	64.7042	0.76485	-0.386751	0.175802	0.720701	Down	0.833237	1.12706	0.983218	1.28599	1.29214	1.2991	68982	RIKEN cDNA 1500015A07 gene	non_coding			GO:0003674,GO:0005575,GO:0008150	molecular_function|cellular_component|biological_process
1500026H17Rik	14.0789	14.8293	13.3285	0.899677	-0.152521	0.83554	0.983729	Down	0.0501982	0.122219	0.201395	0.073321	0.160588	0.188844	69002	RIKEN cDNA 1500026H17 gene	non_coding			GO:0003674,GO:0005575,GO:0008150	molecular_function|cellular_component|biological_process
1600002D24Rik	4.66966	5.71243	3.62689	0.633415	-0.658777	0.542084	0.928556	Down	0.0550254	0.0418663	0.0413928	0.12279	0.0366731	0.0588079	69776	RIKEN cDNA 1600002D24 gene	non_coding			GO:0003674,GO:0005575,GO:0008150	molecular_function|cellular_component|biological_process
1600010M07Rik	5.19775	2.39299	8.0025	3.32859	1.73491	0.1816	0.727449	Up	0.544113	0.250903	0.297679	0.280971	0	0.042292	69781	RIKEN cDNA 1600010M07 gene	non_coding			GO:0003674,GO:0005575,GO:0008150	molecular_function|cellular_component|biological_process
1600012H06Rik	1792.5	1805.57	1779.44	0.985632	-0.0208793	0.862532	0.98672	Down	16.6946	19.0784	18.9403	16.992	19.1091	19.9927	67912	RIKEN cDNA 1600012H06 gene	protein_coding			GO:0003674,GO:0005576,GO:0006915,GO:0008150	molecular_function|extracellular region|apoptotic process|biological_process			R-MMU-168249,R-MMU-168256,R-MMU-6798695	Innate Immune System|Immune System|Neutrophil degranulation
1600012P17Rik	141777	144032	139523	0.968695	-0.0458854	0.864477	0.98672	Down	1708.01	1868.92	1198.42	2084.12	1749.02	1078.5	72025	RIKEN cDNA 1600012P17 gene	non_coding			GO:0003674,GO:0005575,GO:0008150	molecular_function|cellular_component|biological_process
1600014C10Rik	1590.33	1493.96	1686.7	1.12889	0.174908	0.313975	0.834307	Up	12.9364	11.7092	16.6926	11.7505	11.0331	14.3651	72244	RIKEN cDNA 1600014C10 gene	protein_coding			GO:0003674,GO:0005737,GO:0005739,GO:0005783,GO:0005829,GO:0006914,GO:0006915,GO:0006979,GO:0016020,GO:0031966,GO:0051560	molecular_function|cytoplasm|mitochondrion|endoplasmic reticulum|cytosol|autophagy|apoptotic process|response to oxidative stress|membrane|mitochondrial membrane|mitochondrial calcium ion homeostasis
1600014C23Rik	2.87777	3.25242	2.50312	0.768959	-0.379022	0.834942	0.983729	Down	0	0.357651	0	0.204343	0.0447553	0.215305	72240	RIKEN cDNA 1600014C23 gene	protein_coding			GO:0003674,GO:0005575,GO:0008150	molecular_function|cellular_component|biological_process
1600015H23Rik	22.1518	19.7214	24.5822	1.25026	0.322224	0.614548	0.943861	Up	1.02544	1.58519	0.734656	0.356617	1.43195	0.918496	105243551	RIKEN cDNA 1600015H23 gene	non_coding			GO:0003674,GO:0005575,GO:0008150	molecular_function|cellular_component|biological_process
1600019K03Rik	81.3249	96.459	66.1908	0.686769	-0.542103	0.284432	0.813106	Down	1.2137	5.05467	5.57415	3.62847	7.03887	6.71779	69768	RIKEN cDNA 1600019K03 gene	non_coding			GO:0003674,GO:0005575,GO:0008150	molecular_function|cellular_component|biological_process
1600020E01Rik	124.48	128.604	120.357	0.935012	-0.0969434	0.70708	0.961661	Down	4.1164	5.49231	5.38532	5.2646	4.29414	6.69469	72012	RIKEN cDNA 1600020E01 gene	non_coding			GO:0003674,GO:0005575,GO:0008150	molecular_function|cellular_component|biological_process
1600023N17Rik	4.61258	4.55696	4.6682	1.02725	0.038783	0.972267	0.996904	Up	0.0302285	0.245328	0.121277	0.122646	0.13431	0.129226	69788	RIKEN cDNA 1600023N17 gene	non_coding			GO:0003674,GO:0005575,GO:0008150	molecular_function|cellular_component|biological_process
1600025M17Rik	1346.17	1563.32	1129.03	0.722268	-0.469394	0.00256033	0.0778789	Down	51.3038	61.1444	62.5202	66.7181	86.0819	92.4914	72030	RIKEN cDNA 1600025M17 gene	non_coding			GO:0003674,GO:0005575,GO:0008150	molecular_function|cellular_component|biological_process
1600029I14Rik	5.64001	2.9933	8.28672	2.75984	1.46459	0.17478	0.71991	Up	0.176333	0.536654	0.106117	0.11447	0.0626781	0.120611	69797	RIKEN cDNA 1600029I14 gene	non_coding			GO:0003674,GO:0005575,GO:0008150	molecular_function|cellular_component|biological_process
1700001C19Rik	29.8291	27.723	31.9352	1.14893	0.20029	0.720418	0.963554	Up	0.554006	0.327847	0.478491	0.187314	0.341881	0.697349	75462	RIKEN cDNA 1700001C19 gene	protein_coding			GO:0003674,GO:0005575,GO:0008150	molecular_function|cellular_component|biological_process
1700001G11Rik	5.42936	7.56006	3.29866	0.434483	-1.20263	0.293863	0.82043	Down	0.276644	0.0400924	0.039639	0.384832	0.210716	0.236528	69303	RIKEN cDNA 1700001G11 gene	non_coding			GO:0003674,GO:0005575,GO:0008150	molecular_function|cellular_component|biological_process
1700001G17Rik	3.70547	3.06259	4.34834	1.42223	0.508157	0.723579	0.964748	Up	0.137099	0.0695417	0.206266	0.222501	0.0609155	0	67503	RIKEN cDNA 1700001G17 gene	non_coding			GO:0003674,GO:0005575,GO:0008150	molecular_function|cellular_component|biological_process
1700001J03Rik	4.83244	6.7888	2.87607	0.422924	-1.24153	0.29461	0.820682	Down	0.0115593	0.0586329	0.0231879	0.0937992	0.020544	0.108714	69282	RIKEN cDNA 1700001J03 gene	protein_coding			GO:0003674,GO:0005575,GO:0008150	molecular_function|cellular_component|biological_process
1700001L05Rik	312.752	350.82	274.684	0.782899	-0.353102	0.223253	0.771441	Down	0.974563	1.02986	1.87351	1.29332	1.58772	2.16123	69291	RIKEN cDNA 1700001L05 gene	non_coding			GO:0003674,GO:0005575,GO:0008150	molecular_function|cellular_component|biological_process
1700001O22Rik	28.2266	21.2731	35.18	1.65457	0.726455	0.109119	0.612454	Up	0.470297	0.326439	0.409641	0.271157	0.241955	0.222214	73598	RIKEN cDNA 1700001O22 gene	protein_coding			GO:0003674,GO:0005575,GO:0008150	molecular_function|cellular_component|biological_process
1700001P01Rik	8.71293	6.50255	10.9233	1.66799	0.738113	0.396837	0.878284	Up	0.78129	0.297224	0.391817	0.198121	0.17357	0.542748	72215	RIKEN cDNA 1700001P01 gene	protein_coding			GO:0003674,GO:0005575,GO:0008150	molecular_function|cellular_component|biological_process
1700003E16Rik	3.09608	3.31191	2.88026	0.869705	-0.201401	0.876191	0.987544	Down	0.0148636	0.045236	0.0596326	0.0723672	0.0264165	0.0381247	71837	RIKEN cDNA 1700003E16 gene	protein_coding			GO:0003674,GO:0005575,GO:0008150	molecular_function|cellular_component|biological_process
1700003F12Rik	4.05159	1.60583	6.49734	4.12383	2.04398	0.169959	0.715234	Up	0.118102	0.0798741	0.51331	0.031945	0.139933	0	75480	RIKEN cDNA 1700003F12 gene	protein_coding			GO:0003674,GO:0005575,GO:0008150	molecular_function|cellular_component|biological_process
1700003G18Rik	3.66529	6.60422	0.726359	0.109602	-3.18966	0.0332202	0.345522	Down	0.0491457	0.0498569	0	0.239279	0.262035	0.420192	69350	RIKEN cDNA 1700003G18 gene	non_coding			GO:0003674,GO:0005575,GO:0008150	molecular_function|cellular_component|biological_process
1700003M07Rik	2.93154	3.32923	2.53385	0.760807	-0.394398	0.772894	0.971651	Down	0.0263242	0.0133526	0.0528064	0.0747638	0.0233926	0.022507	72225	RIKEN cDNA 1700003M07 gene	non_coding			GO:0003674,GO:0005575,GO:0008150	molecular_function|cellular_component|biological_process
1700007L15Rik	19.6943	21.3002	18.0883	0.849955	-0.234542	0.693978	0.959674	Down	0.693434	0.993133	0.368213	1.02609	0.761199	0.627757	100502742	RIKEN cDNA 1700007L15 gene	non_coding
1700008J07Rik	42.0828	47.2885	36.8771	0.78025	-0.357991	0.347304	0.850005	Down	0.35081	0.394017	0.540359	0.467669	0.578948	0.621303	629159	RIKEN cDNA 1700008J07 gene	non_coding			GO:0003674,GO:0005575,GO:0008150	molecular_function|cellular_component|biological_process
1700009N14Rik	3.77476	5.74622	1.80331	0.315924	-1.66235	0.281864	0.810379	Down	0.0241063	0.0489102	0.0483571	0.0978064	0.278481	0	75471	RIKEN cDNA 1700009N14 gene	protein_coding	mmu03013,mmu03008,mmu03250,mmu05166	Nucleocytoplasmic transport|Ribosome biogenesis in eukaryotes|Viral life cycle - HIV-1|Human T-cell leukemia virus 1 infection	GO:0000054,GO:0003924,GO:0005634,GO:0005737,GO:0006606,GO:0019904	ribosomal subunit export from nucleus|GTPase activity|nucleus|cytoplasm|protein import into nucleus|protein domain specific binding
1700010G06Rik	2.25469	0.869222	3.64016	4.10493	2.03736	0.229026	0.774311	Up	0.0531397	0.0107817	0.0426393	0.00862416	0	0.0181736	115488511	RIKEN cDNA 1700010G06 gene	non_coding			GO:0003674,GO:0005575,GO:0008150	molecular_function|cellular_component|biological_process
1700010I14Rik	14.7717	16.0316	13.5117	0.838998	-0.253261	0.790264	0.975261	Down	0.389397	0.115218	0.0976412	0.250151	0.0288359	0.471653	66931	RIKEN cDNA 1700010I14 gene	protein_coding			GO:0003674,GO:0005575,GO:0008150	molecular_function|cellular_component|biological_process
1700012D01Rik	23.6717	22.2974	25.046	1.12674	0.172154	0.772247	0.971651	Up	1.27142	0.756103	1.01139	1.03171	1.24671	0.412332	72243	RIKEN cDNA 1700012D01 gene	non_coding			GO:0003674,GO:0005575,GO:0008150	molecular_function|cellular_component|biological_process
1700013H16Rik	7.03209	7.22115	6.84303	0.947463	-0.0778586	0.960965	0.995359	Down	0.0223717	0	0.403899	0.38123	0.0198803	0.0382554	75514	RIKEN cDNA 1700013H16 gene	protein_coding			GO:0000785,GO:0000795,GO:0001741,GO:0005515,GO:0005634,GO:0005730,GO:0007286,GO:0051321	chromatin|synaptonemal complex|XY body|protein binding|nucleus|nucleolus|spermatid development|meiotic cell cycle
1700016A09Rik	2.02065	1.13586	2.90543	2.52255	1.33488	0.550146	0.930151	Up	0.145966	0.148078	0	0	0	0.1248	74227	RIKEN cDNA 1700016A09 gene	non_coding			GO:0003674,GO:0005575,GO:0008150	molecular_function|cellular_component|biological_process
1700016C15Rik	3.38325	4.60141	2.16508	0.471826	-1.08367	0.444006	0.90028	Down	0.0299905	0.0304245	0.120322	0.243361	0.106602	0.0256416	69428	RIKEN cDNA 1700016C15 gene	protein_coding			GO:0003674,GO:0005575,GO:0008150	molecular_function|cellular_component|biological_process
1700016G22Rik	3.24664	3.61092	2.88235	0.798315	-0.324971	0.801024	0.97746	Down	0.0513833	0.104254	0.257687	0.0833911	0.182644	0.263594	71867	RIKEN cDNA 1700016G22 gene	non_coding			GO:0003674,GO:0005575,GO:0008150	molecular_function|cellular_component|biological_process
1700017B05Rik	1567.31	1454.71	1679.91	1.1549	0.207769	0.106674	0.606698	Up	8.20182	7.86051	7.18188	6.55437	6.88547	6.88895	74211	RIKEN cDNA 1700017B05 gene	protein_coding			GO:0003674,GO:0005829,GO:0008150	molecular_function|cytosol|biological_process
1700017M07Rik	16.6842	12.0778	21.2905	1.7628	0.817872	0.238242	0.778154	Up	0.387745	0.622815	0.907453	0.1311	0.430704	0.552532	76398	RIKEN cDNA 1700017M07 gene	non_coding			GO:0003674,GO:0005575,GO:0008150	molecular_function|cellular_component|biological_process
1700018G05Rik	11.6004	10.2151	12.9857	1.26986	0.344668	0.624528	0.94551	Up	0.610934	1.31702	0.842553	0.495749	0.67862	1.04469	69388	RIKEN cDNA 1700018G05 gene	non_coding			GO:0003674,GO:0005575,GO:0008150	molecular_function|cellular_component|biological_process
1700018L02Rik	2.09221	2.70933	1.47508	0.541205	-0.885752	0.636736	0.947168	Down	0.0977396	0	0	0.0793118	0.0434273	0.062675	67329	RIKEN cDNA 1700018L02 gene	non_coding			GO:0003674,GO:0005575,GO:0008150	molecular_function|cellular_component|biological_process
1700019D03Rik	412.794	355.961	469.627	1.31951	0.399999	0.119782	0.637085	Up	2.90969	2.1115	4.20365	2.25195	2.44095	2.37276	67080	RIKEN cDNA 1700019D03 gene	protein_coding			GO:0003674,GO:0005886,GO:0008150,GO:0016020,GO:0034237	molecular_function|plasma membrane|biological_process|membrane|protein kinase A regulatory subunit binding
1700020G03Rik	2.52446	1.81526	3.23366	1.78317	0.834447	0.579067	0.935682	Up	0.0108784	0.0662148	0.021822	0.0353095	0.00966689	0.00930093	105243207	RIKEN cDNA 1700020G03 gene	non_coding			GO:0003674,GO:0005575,GO:0008150	molecular_function|cellular_component|biological_process
1700020L13Rik	5.52434	8.50992	2.53876	0.296832	-1.75228	0.130857	0.658429	Down	0.0772052	0.0783225	0.0258123	0.229713	0.0457381	0.352053	108167416	RIKEN cDNA 1700020L13 gene	non_coding			GO:0003674,GO:0005575,GO:0008150	molecular_function|cellular_component|biological_process
1700020L24Rik	3.43394	2.87431	3.99357	1.37353	0.457889	0.751186	0.968248	Up	0.141459	0.114805	0.0567534	0.0459154	0	0.193515	66330	RIKEN cDNA 1700020L24 gene	protein_coding			GO:0003674,GO:0005575,GO:0008150	molecular_function|cellular_component|biological_process
1700022N22Rik	19.1751	25.2631	13.087	0.516209	-0.953974	0.220364	0.770258	Down	0.357074	0.241494	0.119382	0.547308	0.105769	0.7802	69431	RIKEN cDNA 1700022N22 gene	non_coding			GO:0003674,GO:0005575,GO:0008150	molecular_function|cellular_component|biological_process
1700023D09Rik	7.72223	8.21233	7.23213	0.881402	-0.182128	0.851979	0.98672	Down	0.343466	0.597319	0.0492137	0.477787	0.348817	0.293661	102640359	RIKEN cDNA 1700023D09 gene	non_coding			GO:0003674,GO:0005575,GO:0008150	molecular_function|cellular_component|biological_process
1700024G13Rik	5.8189	5.10757	6.53023	1.27543	0.350983	0.724304	0.964875	Up	0.612469	0.621332	0.153576	0.248497	0.340163	0.523656	67085	RIKEN cDNA 1700024G13 gene	protein_coding			GO:0003674,GO:0005575,GO:0008150	molecular_function|cellular_component|biological_process
1700024N05Rik	5.62869	5.47588	5.78151	1.05748	0.0806349	0.936167	0.993203	Up	0.154672	0.282438	0.0620542	0.100408	0.192425	0.18514	75520	RIKEN cDNA 1700024N05 gene	non_coding			GO:0003674,GO:0005575,GO:0008150	molecular_function|cellular_component|biological_process
1700025G04Rik	7012.89	7788.34	6237.44	0.80089	-0.320324	0.0396944	0.379654	Down	16.0851	18.0061	13.4467	20.2916	20.6476	18.79	69399	RIKEN cDNA 1700025G04 gene	protein_coding			GO:0003674,GO:0005575,GO:0008150	molecular_function|cellular_component|biological_process
1700028E10Rik	7.53249	9.95602	5.10897	0.511701	-0.966627	0.321065	0.838662	Down	0.100895	0.0454912	0.0112442	0.0636785	0.109583	0.143774	625175	RIKEN cDNA 1700028E10 gene	non_coding			GO:0003674,GO:0005575,GO:0008150	molecular_function|cellular_component|biological_process
1700028J19Rik	7.43073	6.54472	8.31673	1.2656	0.339825	0.701069	0.960764	Up	0.15389	0.130098	0.308704	0.104063	0.11396	0.26315	70004	RIKEN cDNA 1700028J19 gene	non_coding			GO:0003674,GO:0005575,GO:0005886,GO:0008150	molecular_function|cellular_component|plasma membrane|biological_process
1700028K03Rik	10.5614	12.4183	8.7044	0.700465	-0.513615	0.479059	0.91133	Down	0.093726	0.0855741	0.0470035	0.136899	0.0916169	0.096162	76421	RIKEN cDNA 1700028K03 gene	protein_coding			GO:0005515,GO:0005694,GO:0007130,GO:0007131,GO:0051321	protein binding|chromosome|synaptonemal complex assembly|reciprocal meiotic recombination|meiotic cell cycle
1700029J07Rik	51.3509	56.1133	46.5886	0.829436	-0.269797	0.4771	0.910876	Down	0.377548	0.642107	0.423231	0.513612	0.473649	0.778519	69479	RIKEN cDNA 1700029J07 gene	protein_coding			GO:0003674,GO:0005737,GO:0005813,GO:0005856,GO:0005881,GO:0008150,GO:0097731	molecular_function|cytoplasm|centrosome|cytoskeleton|cytoplasmic microtubule|biological_process|9+0 non-motile cilium
1700030C10Rik	75.1417	68.437	81.8464	1.1934	0.255072	0.626719	0.946452	Up	1.94078	0.698054	1.34493	1.10241	0.45468	1.90072	69513	RIKEN cDNA 1700030C10 gene	non_coding			GO:0003674,GO:0005575,GO:0008150	molecular_function|cellular_component|biological_process
1700030J22Rik	130.471	130.13	130.812	1.00574	0.00825776	0.972533	0.996904	Up	1.09385	0.933139	0.980767	0.847269	1.11931	1.06276	69528	RIKEN cDNA 1700030J22 gene	protein_coding			GO:0003674,GO:0005654,GO:0005829,GO:0008150	molecular_function|nucleoplasm|cytosol|biological_process
1700030K09Rik	147.297	163.983	130.61	0.796427	-0.328386	0.118178	0.633265	Down	1.29637	1.45479	1.41532	1.78738	1.63114	1.86365	72254	RIKEN cDNA 1700030K09 gene	protein_coding			GO:0003674,GO:0005575,GO:0008150	molecular_function|cellular_component|biological_process
1700031F05Rik	21.2829	22.3383	20.2275	0.903021	-0.147169	0.788627	0.974839	Down	0.313435	0.454244	0.494017	0.472345	0.278529	0.669961	73300	RIKEN cDNA 1700031F05 gene	protein_coding			GO:0003674,GO:0005575,GO:0008150	molecular_function|cellular_component|biological_process
1700034H15Rik	30.3825	27.8932	32.8717	1.17645	0.234438	0.606649	0.941917	Up	0.16765	0.2622	0.210191	0.20973	0.124149	0.215009	98736	RIKEN cDNA 1700034H15 gene	non_coding			GO:0003674,GO:0005575,GO:0008150	molecular_function|cellular_component|biological_process
1700034P13Rik	15.3359	20.9184	9.75337	0.465618	-1.10278	0.10394	0.601651	Down	0.122371	0.124142	0.306844	0.430296	0.253733	0.52313	73331	RIKEN cDNA 1700034P13 gene	non_coding			GO:0003674,GO:0005575,GO:0008150	molecular_function|cellular_component|biological_process
1700037C18Rik	17.8587	18.972	16.7453	0.883129	-0.179304	0.778034	0.97274	Down	0.694401	0.366314	0.222875	0.405705	0.617068	0.451218	73261	RIKEN cDNA 1700037C18 gene	protein_coding			GO:0003674,GO:0005575,GO:0008150	molecular_function|cellular_component|biological_process
1700040K01Rik	22.6151	32.9591	12.2712	0.37346	-1.42098	0.0376081	0.369548	Down	0.249984	0.535382	0.167156	0.81141	1.30818	0.403721	102631675	RIKEN cDNA 1700040K01 gene	non_coding			GO:0003674,GO:0005575,GO:0008150	molecular_function|cellular_component|biological_process
1700042O10Rik	2.71931	2.90896	2.52967	0.862916	-0.212707	0.887868	0.989145	Down	0.056689	0.086264	0.056859	0.0920017	0	0.145406	73321	RIKEN cDNA 1700042O10 gene	non_coding			GO:0003674,GO:0005575,GO:0008150	molecular_function|cellular_component|biological_process
1700045H11Rik	3.03051	3.87984	2.18117	0.559457	-0.837902	0.520774	0.922854	Down	0.15415	0.104254	0.0515374	0.250173	0.0913219	0.219662	73348	RIKEN cDNA 1700045H11 gene	non_coding			GO:0003674,GO:0005575,GO:0008150	molecular_function|cellular_component|biological_process
1700047M11Rik	2.58161	4.07719	1.08604	0.264811	-1.91697	0.235295	0.778061	Down	0.0444174	0.0450602	0.0445506	0.0360429	0.0789415	0.417742	67330	RIKEN cDNA 1700047M11 gene	non_coding			GO:0003674,GO:0005575,GO:0008150	molecular_function|cellular_component|biological_process
1700048M11Rik	1.30454	2.60909	0	0.0768008	-3.70273	0.297221	0.823154	Down	0	0	0	0	0.44848	0	100503166	RIKEN cDNA 1700048M11 gene	non_coding			GO:0003674,GO:0005575,GO:0008150	molecular_function|cellular_component|biological_process
1700048O20Rik	7.5541	7.90124	7.20696	0.914036	-0.129676	0.878545	0.987887	Down	0.0659531	0.183996	0.0826886	0.107037	0.131868	0.126876	69430	RIKEN cDNA 1700048O20 gene	non_coding			GO:0003674,GO:0005575,GO:0008150	molecular_function|cellular_component|biological_process
1700049E15Rik	1.77519	2.10675	1.44363	0.684911	-0.546011	0.730049	0.96572	Down	0.033084	0.0671255	0.0331832	0.0536926	0.058799	0.0848596	100039727	RIKEN cDNA 1700049E15 gene	non_coding			GO:0003674,GO:0005575,GO:0008150	molecular_function|cellular_component|biological_process
1700052H01Rik	1.27104	2.54207	0	0.0789327	-3.66323	0.150951	0.690788	Down	0	0	0	0.0228516	0.150149	0.0240775	73462	RIKEN cDNA 1700052H01 gene	non_coding			GO:0003674,GO:0005575,GO:0008150	molecular_function|cellular_component|biological_process
1700052K11Rik	487.319	497.869	476.769	0.957982	-0.0619295	0.719127	0.96315	Down	5.97036	5.32688	5.4059	5.86897	6.29253	5.40679	73431	RIKEN cDNA 1700052K11 gene	non_coding			GO:0003674,GO:0005575,GO:0008150	molecular_function|cellular_component|biological_process
1700055D16Rik	8.67042	7.2068	10.134	1.40259	0.488098	0.516323	0.921153	Up	0.12259	0.124364	0.136619	0.0884236	0.0726248	0.116459	105242798	RIKEN cDNA 1700055D16 gene	non_coding			GO:0003674,GO:0005575,GO:0008150	molecular_function|cellular_component|biological_process
1700055D18Rik	11.4461	14.6048	8.28737	0.568566	-0.814599	0.308119	0.82968	Down	0.0592808	0.120277	0.277473	0.160347	0.333633	0.321003	73405	RIKEN cDNA 1700055D18 gene	non_coding			GO:0003674,GO:0005575,GO:0008150	molecular_function|cellular_component|biological_process
1700055K11Rik	2.348	4.33631	0.359681	0.0892995	-3.4852	0.0862258	0.552836	Down	0	0	0.0134752	0.0218038	0.0119387	0.137841	102640035	RIKEN cDNA 1700055K11 gene	non_coding			GO:0003674,GO:0005575,GO:0008150	molecular_function|cellular_component|biological_process
1700056E22Rik	13.2232	11.955	14.4915	1.2155	0.281547	0.677094	0.956048	Up	0.441142	0.351628	0.47407	0.178985	0.504018	0.377173	73363	RIKEN cDNA 1700056E22 gene	protein_coding			GO:0003674,GO:0005575,GO:0008150	molecular_function|cellular_component|biological_process
1700063D05Rik	2.61483	2.00509	3.22457	1.59453	0.673135	0.717824	0.962887	Up	0	0.26159	0.129316	0.0348737	0	0.220467	78500	RIKEN cDNA 1700063D05 gene	non_coding			GO:0003674,GO:0005575,GO:0008150	molecular_function|cellular_component|biological_process
1700063K16Rik	2.72496	3.30439	2.14553	0.650078	-0.621316	0.74203	0.967786	Down	0	0.143108	0	0.152626	0.0208927	0.0402035	76610	RIKEN cDNA 1700063K16 gene	non_coding
1700066M21Rik	197.714	194.171	201.258	1.03707	0.0525097	0.793341	0.976089	Up	1.69531	1.867	1.50944	1.60373	1.70792	1.62001	73467	RIKEN cDNA 1700066M21 gene	protein_coding			GO:0003674,GO:0005739,GO:0006119,GO:0070469	molecular_function|mitochondrion|oxidative phosphorylation|respirasome
1700067K01Rik	3.13199	2.65736	3.60662	1.34921	0.432119	0.740244	0.967295	Up	0.0267636	0.0543018	0.0536877	0.0108588	0.023783	0.068648	73453	RIKEN cDNA 1700067K01 gene	protein_coding			GO:0001701,GO:0003674,GO:0005575	in utero embryonic development|molecular_function|cellular_component
1700084E18Rik	3.48692	1.60583	5.36801	3.38963	1.76113	0.33616	0.845218	Up	0	0.923785	0.140514	0.0568401	0.248983	0	67350	RIKEN cDNA 1700084E18 gene	non_coding			GO:0003674,GO:0005575,GO:0008150	molecular_function|cellular_component|biological_process
1700086L19Rik	145.27	166.775	123.765	0.741451	-0.431576	0.094245	0.578151	Down	3.32086	3.9895	2.71725	4.23122	3.72761	5.77824	74284	RIKEN cDNA 1700086L19 gene	non_coding			GO:0003674,GO:0005575,GO:0008150	molecular_function|cellular_component|biological_process
1700086O06Rik	40.7585	43.9617	37.5553	0.852228	-0.230688	0.662602	0.954101	Down	0.410268	0.672332	0.569768	0.409744	0.364578	1.22772	73516	RIKEN cDNA 1700086O06 gene	non_coding			GO:0003674,GO:0005575,GO:0008150	molecular_function|cellular_component|biological_process
1700086P04Rik	30.0794	29.7741	30.3847	1.01761	0.0251907	0.960175	0.995359	Up	0.108184	0.130855	0.112681	0.145186	0.0554628	0.149417	67349	RIKEN cDNA 1700086P04 gene	non_coding			GO:0003674,GO:0005575,GO:0008150	molecular_function|cellular_component|biological_process
1700088E04Rik	157.099	175.668	138.53	0.789005	-0.341893	0.237914	0.778154	Down	2.47781	2.55896	3.55994	4.51036	3.53091	2.86285	27660	RIKEN cDNA 1700088E04 gene	protein_coding			GO:0003674,GO:0005575,GO:0008150	molecular_function|cellular_component|biological_process
1700093K21Rik	1.87719	1.19536	2.55903	2.1281	1.08956	0.544564	0.928885	Up	0.0482889	0.0195951	0	0.00783691	0.00858223	0.0165147	67358	RIKEN cDNA 1700093K21 gene	protein_coding			GO:0003674,GO:0005575,GO:0008150,GO:0016020	molecular_function|cellular_component|biological_process|membrane
1700095J03Rik	4.17722	3.62825	4.7262	1.3006	0.379179	0.73036	0.96572	Up	0.100728	0.034062	0.084192	0.0408685	0.0596737	0.0717683	74293	RIKEN cDNA 1700095J03 gene	non_coding			GO:0003674,GO:0005575,GO:0008150	molecular_function|cellular_component|biological_process
1700096K18Rik	67.7093	62.6988	72.7199	1.15708	0.210491	0.538648	0.927616	Up	1.3248	1.51463	1.41314	1.10915	0.859586	1.77994	73571	RIKEN cDNA 1700096K18 gene	non_coding			GO:0003674,GO:0005575,GO:0008150	molecular_function|cellular_component|biological_process
1700101I11Rik	10.0619	10.008	10.1159	1.01174	0.0168439	0.981028	0.997617	Up	0.204499	0.266732	0.351621	0.237061	0.285567	0.299734	100504641	RIKEN cDNA 1700101I11 gene	non_coding			GO:0003674,GO:0005575,GO:0008150	molecular_function|cellular_component|biological_process
1700102P08Rik	9.71858	9.33457	10.1026	1.08844	0.122267	0.885974	0.989145	Up	0.0945794	0.175905	0.173916	0.166286	0.196108	0.0404323	112418	RIKEN cDNA 1700102P08 gene	protein_coding			GO:0003674,GO:0005575,GO:0007283,GO:0030154	molecular_function|cellular_component|spermatogenesis|cell differentiation
1700105F02Rik	4.83749	7.86049	1.81449	0.231767	-2.10925	0.0859441	0.551809	Down	0.018317	0.00929103	0.0183719	0.0371588	0.130217	0.0313218	102640957	RIKEN cDNA 1700105F02 gene	non_coding			GO:0003674,GO:0005575,GO:0008150	molecular_function|cellular_component|biological_process
1700108F19Rik	7.87633	5.63333	10.1193	1.78858	0.838816	0.399061	0.879716	Up	0.210624	0.106836	0.668977	0.113942	0.124779	0.330151	73272	RIKEN cDNA 1700108F19 gene	non_coding			GO:0003674,GO:0005575,GO:0008150	molecular_function|cellular_component|biological_process
1700109H08Rik	6.59295	7.78225	5.40365	0.69379	-0.52743	0.578	0.935041	Down	0.127847	0.389093	0.128231	0.207486	0.265089	0.473671	77036	RIKEN cDNA 1700109H08 gene	protein_coding			GO:0003674,GO:0005509,GO:0005575,GO:0008150	molecular_function|calcium ion binding|cellular_component|biological_process
1700110C19Rik	2.12902	2.09923	2.15881	1.02733	0.0388982	0.97995	0.997617	Up	0.0422027	0.171254	0.0423292	0.136983	0.0375027	0.0721659	76634	RIKEN cDNA 1700110C19 gene	non_coding			GO:0003674,GO:0005575,GO:0008150	molecular_function|cellular_component|biological_process
1700110I01Rik	3.35579	3.7796	2.93198	0.778341	-0.361526	0.811103	0.978788	Down	0.107416	0	0.0359127	0.0290546	0.127271	0.0306133	73549	RIKEN cDNA 1700110I01 gene	non_coding			GO:0003674,GO:0005575,GO:0008150	molecular_function|cellular_component|biological_process
1700112J16Rik	14.0734	15.0884	13.0584	0.864729	-0.209679	0.786668	0.974631	Down	0.195793	0.211041	0.0368213	0.099299	0.184863	0.24064	76628	RIKEN cDNA 1700112J16 gene	non_coding			GO:0003674,GO:0005575,GO:0008150	molecular_function|cellular_component|biological_process
1700113A16Rik	11.5463	13.0013	10.0914	0.77692	-0.364162	0.598219	0.939316	Down	0.154986	0.37735	0.341993	0.352143	0.358088	0.424039	76642	RIKEN cDNA 1700113A16 gene	non_coding			GO:0003674,GO:0005575,GO:0008150	molecular_function|cellular_component|biological_process
1700122H20Rik	5.04926	9.02576	1.07277	0.119784	-3.06149	0.0473891	0.414308	Down	0	0.22027	0	0.822224	0.836105	0.123762	73617	RIKEN cDNA 1700122H20 gene	non_coding			GO:0003674,GO:0005575,GO:0008150	molecular_function|cellular_component|biological_process
1700123M08Rik	9.92317	12.2413	7.60509	0.622387	-0.684116	0.380479	0.870925	Down	0.22867	0.289974	0.0860086	0.278335	0.406408	0.293267	100503636	RIKEN cDNA 1700123M08 gene	non_coding			GO:0009611	response to wounding
1700123O20Rik	1053.36	1105.3	1001.41	0.906106	-0.142248	0.383166	0.871652	Down	12.8746	14.1234	17.8748	15.2066	17.0108	17.8272	58248	RIKEN cDNA 1700123O20 gene	protein_coding			GO:0003674,GO:0005739,GO:0005829,GO:0008150	molecular_function|mitochondrion|cytosol|biological_process
1810010H24Rik	210.26	172.871	247.65	1.43327	0.519315	0.162836	0.706548	Up	1.53377	1.27553	3.32717	1.62087	1.55314	1.11313	69066	RIKEN cDNA 1810010H24 gene	protein_coding			GO:0003674,GO:0005575,GO:0008150	molecular_function|cellular_component|biological_process
1810012K16Rik	3.7619	4.28804	3.23576	0.757734	-0.400236	0.755526	0.968605	Down	0.0562183	0.285159	0.169161	0.0456189	0.349702	0.288397	69108	RIKEN cDNA 1810012K16 gene	non_coding			GO:0003674,GO:0005575,GO:0008150	molecular_function|cellular_component|biological_process
1810019D21Rik	81.9177	70.9013	92.9341	1.30828	0.38767	0.233839	0.777562	Up	1.35054	1.50146	1.92982	1.11092	0.904209	1.70832	69771	RIKEN cDNA 1810019D21 gene	non_coding			GO:0003674,GO:0005575,GO:0008150	molecular_function|cellular_component|biological_process
1810019N24Rik	5.12724	8.45327	1.80122	0.21446	-2.22122	0.0711659	0.506265	Down	0.0199936	0.060849	0.0200536	0.0648962	0.302039	0.102567	69086	RIKEN cDNA 1810019N24 gene	non_coding			GO:0003674,GO:0005575,GO:0008150	molecular_function|cellular_component|biological_process
1810021B22Rik	8.34854	6.85354	9.84354	1.43018	0.5162	0.593529	0.938657	Up	0.698861	0.0945299	0.467304	0.151226	0.248412	0.517851	69120	RIKEN cDNA 1810021B22 gene	non_coding			GO:0003674,GO:0005575,GO:0008150	molecular_function|cellular_component|biological_process
1810021M19Rik	3.83133	4.05604	3.60662	0.896423	-0.157748	0.893143	0.989286	Down	0.0113104	0.0229482	0.0226887	0.0183559	0.0351779	0.00967034	105244357	RIKEN cDNA 1810021M19 gene	non_coding			GO:0003674,GO:0005575,GO:0008150	molecular_function|cellular_component|biological_process
1810024B03Rik	10.5388	8.81491	12.2628	1.39323	0.478433	0.537912	0.927616	Up	0.0970392	0.164073	0.291991	0.183735	0.114976	0.0967958	329509	RIKEN cDNA 1810024B03 gene	protein_coding			GO:0004674,GO:0005634,GO:0005737,GO:0005829,GO:0006468,GO:0035556,GO:0045719	protein serine/threonine kinase activity|nucleus|cytoplasm|cytosol|protein phosphorylation|intracellular signal transduction|negative regulation of glycogen biosynthetic process
1810030O07Rik	1231.39	1239.52	1223.26	0.986818	-0.0191434	0.877753	0.987781	Down	9.0735	9.8378	10.561	9.83111	9.3722	10.9957	69155	RIKEN cDNA 1810030O07 gene	protein_coding			GO:0003674,GO:0005575,GO:0008150	molecular_function|cellular_component|biological_process
1810034E14Rik	88.3464	72.2328	104.46	1.44589	0.531962	0.0597701	0.468943	Up	1.31892	1.61246	1.98431	1.15257	1.0368	1.24332	66503	RIKEN cDNA 1810034E14 gene	non_coding			GO:0003674,GO:0005575,GO:0008150	molecular_function|cellular_component|biological_process
1810037I17Rik	1729.16	1754.9	1703.42	0.970632	-0.0430031	0.812277	0.979053	Down	43.0518	43.1048	61.6557	45.8282	48.4944	60.1382	67704	RIKEN cDNA 1810037I17 gene	protein_coding	mmu04020	Calcium signaling pathway	GO:0005515,GO:0005789,GO:0016020,GO:1901877,GO:1901895	protein binding|endoplasmic reticulum membrane|membrane|negative regulation of calcium ion binding|negative regulation of ATPase-coupled calcium transmembrane transporter activity
1810041H14Rik	15.7648	11.7268	19.8028	1.68805	0.75536	0.3702	0.865488	Up	0.199413	0.485517	1.52008	0.194179	0.460733	0.681987	78312	RIKEN cDNA 1810041H14 gene	non_coding			GO:0003674,GO:0005575,GO:0008150	molecular_function|cellular_component|biological_process
1810044D09Rik	14.3777	13.9127	14.8428	1.06645	0.0928113	0.874481	0.987502	Up	0.877746	0.954052	0.75461	0.763132	0.779994	0.91128	69798	RIKEN cDNA 1810044D09 gene	non_coding			GO:0003674,GO:0005575,GO:0008150	molecular_function|cellular_component|biological_process
1810053B23Rik	4.03723	3.75476	4.3197	1.16107	0.215451	0.856788	0.98672	Up	0.023593	0.0837704	0.0354956	0.0287171	0.0733793	0.0201718	69857	RIKEN cDNA 1810053B23 gene	non_coding			GO:0003674,GO:0005575,GO:0008150	molecular_function|cellular_component|biological_process
1810055G02Rik	804.03	948.755	659.305	0.695125	-0.524655	0.0137735	0.218747	Down	7.59773	8.02995	8.6295	12.889	13.1386	8.8839	72056	RIKEN cDNA 1810055G02 gene	protein_coding			GO:0003674,GO:0005654,GO:0005794,GO:0005886,GO:0008150,GO:0016020,GO:0043231	molecular_function|nucleoplasm|Golgi apparatus|plasma membrane|biological_process|membrane|intracellular membrane-bounded organelle
1810062G17Rik	31.6738	29.6693	33.6784	1.13226	0.179201	0.67605	0.956026	Up	1.07031	1.01793	1.03997	0.787089	0.743056	1.28687	72282	RIKEN cDNA 1810062G17 gene	protein_coding			GO:0003674,GO:0005575,GO:0008150	molecular_function|cellular_component|biological_process
1810062O18Rik	14.3358	12.8575	15.8142	1.22873	0.297172	0.692686	0.959264	Up	0.162292	0.946683	0.69181	0.428004	0.360545	0.693792	75602	RIKEN cDNA 1810062O18 gene	non_coding			GO:0003674,GO:0005575,GO:0008150	molecular_function|cellular_component|biological_process
1810073O08Rik	6.86041	3.92201	9.79881	2.49321	1.31801	0.140592	0.676127	Up	0.180298	0.0997674	0.164399	0.0798025	0.043696	0.0560557	72285	RIKEN cDNA 1810073O08 gene	non_coding			GO:0003674,GO:0005575,GO:0008150	molecular_function|cellular_component|biological_process
2010001A14Rik	94.8038	96.7553	92.8523	0.959343	-0.0598818	0.845274	0.985825	Down	2.55249	3.23678	4.52025	3.13923	3.29602	4.46701	76516	RIKEN cDNA 2010001A14 gene	non_coding			GO:0003674,GO:0005575,GO:0008150	molecular_function|cellular_component|biological_process
2010001M07Rik	3.39565	1.74597	5.04534	2.85771	1.51486	0.30568	0.829011	Up	0.153503	0.311449	0.615853	0	0.0682039	0.32811	115487174	RIKEN cDNA 2010001M07 gene	non_coding			GO:0003674,GO:0005575,GO:0008150	molecular_function|cellular_component|biological_process
2010003K11Rik	615.202	669.641	560.762	0.837663	-0.255558	0.462672	0.907844	Down	10.444	9.3502	20.8982	15.4031	22.1581	10.9387	69861	RIKEN cDNA 2010003K11 gene	protein_coding			GO:0003674,GO:0005575,GO:0008150	molecular_function|cellular_component|biological_process
2010109A12Rik	3.96848	3.63052	4.30643	1.18769	0.24816	0.851367	0.98672	Up	0.0556028	0.507667	0.111539	0.360956	0.098821	0.0950799	75610	RIKEN cDNA 2010109A12 gene	protein_coding			GO:0003674,GO:0005575,GO:0008150	molecular_function|cellular_component|biological_process
2010109P13Rik	3.64398	4.06967	3.2183	0.788934	-0.342023	0.848521	0.986458	Down	0	0.244896	0	0.0652961	0.0238353	0.22933	108169160	RIKEN cDNA 2010109P13 gene	non_coding			GO:0003674,GO:0005575,GO:0008150	molecular_function|cellular_component|biological_process
2010204K13Rik	2324	1991.27	2656.73	1.3341	0.415868	0.0106738	0.187967	Up	71.6664	72.2461	93.9143	52.6135	56.3865	71.987	68355	RIKEN cDNA 2010204K13 gene	non_coding			GO:0003674,GO:0005575,GO:0008150	molecular_function|cellular_component|biological_process
2010315B03Rik	222.494	220.102	224.886	1.02124	0.0303179	0.886968	0.989145	Up	2.39519	2.47423	1.96358	2.49385	1.89519	2.3658	630836	RIKEN cDNA 2010315B03 gene	protein_coding			GO:0000978,GO:0003700,GO:0006357	RNA polymerase II cis-regulatory region sequence-specific DNA binding|DNA-binding transcription factor activity|regulation of transcription by RNA polymerase II					zf-C2H2
2010320M18Rik	185.374	192.593	178.154	0.924918	-0.112602	0.636229	0.947168	Down	5.27607	6.76314	8.24551	6.3722	6.97822	8.88212	72093	RIKEN cDNA 2010320M18 gene	non_coding			GO:0003674,GO:0005575,GO:0008150	molecular_function|cellular_component|biological_process
2200002D01Rik	698.905	703.997	693.814	0.985784	-0.0206567	0.93217	0.992819	Down	30.891	31.6429	53.4076	36.186	44.9146	37.3051	72275	RIKEN cDNA 2200002D01 gene	protein_coding			GO:0003674,GO:0005634,GO:0005654,GO:0005730,GO:0005829,GO:0005886,GO:0008150	molecular_function|nucleus|nucleoplasm|nucleolus|cytosol|plasma membrane|biological_process
2210011K15Rik	9.39439	13.3817	5.40712	0.404784	-1.30478	0.146105	0.683463	Down	0.0155065	0.0235964	0.0777652	0.138412	0.0826777	0.0662898	72365	RIKEN cDNA 2210011K15 gene	non_coding			GO:0003674,GO:0005575,GO:0008150	molecular_function|cellular_component|biological_process
2210016L21Rik	998.918	1030.5	967.336	0.938845	-0.0910406	0.740423	0.967295	Down	15.784	14.3198	28.9103	17.4575	25.2432	20.7026	72357	RIKEN cDNA 2210016L21 gene	protein_coding			GO:0005575,GO:0005634,GO:0007275,GO:0016055,GO:0030178,GO:0060061	cellular_component|nucleus|multicellular organism development|Wnt signaling pathway|negative regulation of Wnt signaling pathway|Spemann organizer formation
2210039B01Rik	26.2679	22.9181	29.6178	1.29205	0.369657	0.532949	0.926993	Up	0.615858	0.952031	0.853022	0.214176	0.729696	0.977886	73644	RIKEN cDNA 2210039B01 gene	non_coding			GO:0003674,GO:0005575,GO:0008150	molecular_function|cellular_component|biological_process
2210406O10Rik	3.62501	4.36486	2.88516	0.665545	-0.587392	0.642762	0.947984	Down	0.0357423	0.0906489	0.0179248	0.0435052	0.127047	0.0458391	76710	RIKEN cDNA 2210406O10 gene	non_coding			GO:0003674,GO:0005575,GO:0008150	molecular_function|cellular_component|biological_process
2210408F21Rik	11.6452	8.83748	14.453	1.63925	0.713036	0.296009	0.821728	Up	0.292421	0.355984	0.527937	0.189831	0.285841	0.250018	73652	RIKEN cDNA 2210408F21 gene	non_coding			GO:0003674,GO:0005575,GO:0008150	molecular_function|cellular_component|biological_process
2210408I21Rik	164.498	154.478	174.517	1.12972	0.175961	0.498743	0.915648	Up	0.29364	0.20762	0.215684	0.166072	0.235899	0.243452	72371	RIKEN cDNA 2210408I21 gene	protein_coding			GO:0003674,GO:0005575,GO:0008150	molecular_function|cellular_component|biological_process
2210418O10Rik	25.3359	31.8334	18.8384	0.59034	-0.760382	0.198182	0.745203	Down	0.14705	0.141327	0.11644	0.326575	0.0894083	0.277922	100504263	RIKEN cDNA 2210418O10 gene	protein_coding			GO:0003674,GO:0005575,GO:0008150	molecular_function|cellular_component|biological_process					zf-C2H2
2300009A05Rik	75.0284	71.7124	78.3444	1.09043	0.1249	0.703592	0.961208	Up	4.33107	2.94639	3.78188	2.93563	2.80731	4.61789	69478	RIKEN cDNA 2300009A05 gene	protein_coding			GO:0003674,GO:0005575,GO:0005576,GO:0008150	molecular_function|cellular_component|extracellular region|biological_process
2310001H17Rik	6.55611	6.91303	6.19919	0.893644	-0.162228	0.864109	0.98672	Down	0.396233	0.12059	0.158969	0.160764	0.246474	0.372654	76432	RIKEN cDNA 2310001H17 gene	non_coding			GO:0003674,GO:0005575,GO:0008150	molecular_function|cellular_component|biological_process
2310008N11Rik	2.60714	2.34102	2.87326	1.22167	0.288856	0.872268	0.987502	Up	0	0.109227	0.323976	0.174738	0	0.184112	72316	RIKEN cDNA 2310008N11 gene	non_coding			GO:0003674,GO:0005575,GO:0008150	molecular_function|cellular_component|biological_process
2310009B15Rik	80.9781	75.9176	86.0386	1.13272	0.179787	0.597573	0.939302	Up	3.36187	3.57293	5.83402	2.98784	3.55652	4.9275	69549	RIKEN cDNA 2310009B15 gene	protein_coding			GO:0003674,GO:0005575,GO:0008150	molecular_function|cellular_component|biological_process
2310010J17Rik	29.3987	30.5695	28.2279	0.92024	-0.119917	0.809409	0.978788	Down	1.41591	1.49385	1.53377	1.37874	0.956249	2.61487	78329	RIKEN cDNA 2310010J17 gene	non_coding			GO:0003674,GO:0005575,GO:0008150	molecular_function|cellular_component|biological_process
2310011J03Rik	1035.58	1063.34	1007.83	0.947865	-0.0772462	0.626247	0.946452	Down	15.8321	15.2973	20.3008	17.5567	18.2145	19.0482	66374	RIKEN cDNA 2310011J03 gene	protein_coding			GO:0003674,GO:0005575,GO:0008150	molecular_function|cellular_component|biological_process
2310015A10Rik	228.573	237.88	219.267	0.92083	-0.118994	0.591155	0.938307	Down	1.21378	1.38447	1.23635	1.34217	1.07861	1.81207	69548	RIKEN cDNA 2310015A10 gene	non_coding			GO:0003674,GO:0005575,GO:0008150	molecular_function|cellular_component|biological_process
2310016G11Rik	13.922	16.6379	11.2061	0.671601	-0.574324	0.4142	0.886269	Down	0.232155	0.235514	0.436596	0.541605	0.206301	0.620283	69578	RIKEN cDNA 2310016G11 gene	non_coding			GO:0003674,GO:0005575,GO:0008150	molecular_function|cellular_component|biological_process
2310022A10Rik	532.971	512.799	553.142	1.07805	0.108422	0.555696	0.931125	Up	5.877	4.70524	5.12443	4.76896	4.0943	5.95272	66367	RIKEN cDNA 2310022A10 gene	protein_coding			GO:0003674,GO:0005634,GO:0005654,GO:0008150	molecular_function|nucleus|nucleoplasm|biological_process
2310022B05Rik	2729.88	2547.9	2911.86	1.14288	0.192672	0.176833	0.72186	Up	23.9285	22.4146	28.1774	22.5348	21.2636	21.9948	69551	RIKEN cDNA 2310022B05 gene	protein_coding			GO:0003674,GO:0005737,GO:0005829,GO:0008150	molecular_function|cytoplasm|cytosol|biological_process
2310030G06Rik	2050.15	2221.88	1878.42	0.845495	-0.242131	0.0405606	0.384585	Down	39.919	46.2678	41.3612	49.9264	50.5089	51.7072	66952	RIKEN cDNA 2310030G06 gene	protein_coding			GO:0003674,GO:0008150	molecular_function|biological_process
2310033P09Rik	282.855	276.194	289.516	1.04733	0.0667132	0.778196	0.97274	Up	6.29998	6.71444	6.71227	5.03262	5.1627	9.05424	67862	RIKEN cDNA 2310033P09 gene	protein_coding			GO:0003674,GO:0005575,GO:0008150	molecular_function|cellular_component|biological_process			R-MMU-168249,R-MMU-168256,R-MMU-6798695	Innate Immune System|Immune System|Neutrophil degranulation
2310034C09Rik	14.5454	2.27173	26.8191	11.7759	3.55777	0.344778	0.848824	Up	0	2.45848	0	0	0	0.221013	117172	RIKEN cDNA 2310034C09 gene	protein_coding			GO:0003674,GO:0005575,GO:0008150	molecular_function|cellular_component|biological_process			R-MMU-1266738,R-MMU-6805567	Developmental Biology|Keratinization
2310034O05Rik	56.0254	58.6641	53.3868	0.912156	-0.132647	0.779355	0.97274	Down	0.770704	1.34033	1.98775	1.45181	2.07908	0.941351	69571	RIKEN cDNA 2310034O05 gene	non_coding			GO:0003674,GO:0005575,GO:0008150	molecular_function|cellular_component|biological_process
2310039H08Rik	117.065	115.853	118.277	1.02084	0.0297581	0.896886	0.989467	Up	3.90241	4.55871	4.50716	4.2222	3.99324	4.61722	67101	RIKEN cDNA 2310039H08 gene	protein_coding			GO:0003674,GO:0005575,GO:0008150	molecular_function|cellular_component|biological_process
2310040G24Rik	11.3188	7.13978	15.4979	2.1615	1.11203	0.153089	0.69299	Up	0.353849	0.957252	0.394345	0.287134	0.139752	0.369769	381792	RIKEN cDNA 2310040G24 gene	non_coding			GO:0009611	response to wounding
2310043M15Rik	3.59709	3.9717	3.22248	0.814709	-0.295643	0.830694	0.983478	Down	0	0.136949	0.0386857	0.0625961	0.0856866	0.0659542	102633000	RIKEN cDNA 2310043M15 gene	non_coding			GO:0003674,GO:0005575,GO:0008150	molecular_function|cellular_component|biological_process
2310047D07Rik	12.1546	14.1989	10.1103	0.712149	-0.489749	0.510411	0.91942	Down	0.0447435	0.090782	0.0224388	0.090769	0.0596409	0.0717288	69657	RIKEN cDNA 2310047D07 gene	non_coding			GO:0003674,GO:0005575,GO:0008150	molecular_function|cellular_component|biological_process
2310057M21Rik	438.849	431.003	446.695	1.03682	0.0521669	0.764441	0.970214	Up	3.04347	4.22502	3.80236	3.31454	3.71675	3.73583	68277	RIKEN cDNA 2310057M21 gene	protein_coding			GO:0005737,GO:0005739,GO:0008150,GO:0016787,GO:0016887,GO:0042802	cytoplasm|mitochondrion|biological_process|hydrolase activity|ATP hydrolysis activity|identical protein binding
2310057N15Rik	1.60915	0	3.2183	19.239	4.26596	0.197503	0.74435	Up	0	0.271152	0	0	0	0	69696	RIKEN cDNA 2310057N15 gene	protein_coding			GO:0003674,GO:0005575,GO:0008150	molecular_function|cellular_component|biological_process			R-MMU-1266738,R-MMU-6805567	Developmental Biology|Keratinization
2310058N22Rik	163.69	148.764	178.615	1.2004	0.263518	0.446817	0.90184	Up	0.531589	1.10122	0.595911	0.804728	0.436661	0.618737	71921	RIKEN cDNA 2310058N22 gene	non_coding
2310061I04Rik	397.013	370.235	423.791	1.14447	0.194679	0.19267	0.739547	Up	5.45032	5.95006	5.45232	4.89866	4.62723	5.35715	69662	RIKEN cDNA 2310061I04 gene	protein_coding			GO:0003674,GO:0005739,GO:0008150	molecular_function|mitochondrion|biological_process
2310068J16Rik	2.06075	3.03547	1.08604	0.357923	-1.48228	0.337403	0.845447	Down	0.0271814	0.0275747	0.0272629	0.0882264	0.0724628	0.0697196	70281	RIKEN cDNA 2310068J16 gene	non_coding			GO:0003674,GO:0005575,GO:0008150	molecular_function|cellular_component|biological_process
2310069B03Rik	8.92029	4.44777	13.3928	2.99394	1.58204	0.109933	0.612795	Up	0.166414	0.0506465	0.40059	0.0810228	0.0295761	0.0995976	69652	RIKEN cDNA 2310069B03 gene	non_coding			GO:0003674,GO:0005575,GO:0008150	molecular_function|cellular_component|biological_process
2400006E01Rik	8.77068	8.07077	9.47058	1.169	0.225272	0.806937	0.978532	Up	0.402438	0.116646	0.230654	0.373215	0.0766329	0.196618	78648	RIKEN cDNA 2400006E01 gene	non_coding			GO:0003674,GO:0005575,GO:0008150	molecular_function|cellular_component|biological_process
2410002F23Rik	685.622	684.9	686.343	1.00241	0.00347617	0.979539	0.997617	Up	7.23579	8.2135	7.68297	7.51402	7.92706	7.83422	668661	RIKEN cDNA 2410002F23 gene	protein_coding			GO:0003674,GO:0005575,GO:0008150	molecular_function|cellular_component|biological_process
2410003I16Rik	29.827	30.6584	28.9956	0.942765	-0.0850296	0.866535	0.98672	Down	0.256679	0.243594	0.166096	0.268755	0.125084	0.325649	102633190	RIKEN cDNA 2410003I16 gene	non_coding			GO:0003674,GO:0005575,GO:0008150	molecular_function|cellular_component|biological_process
2410003L11Rik	57.9081	63.8087	52.0076	0.816531	-0.29242	0.41171	0.885772	Down	1.89195	3.18204	2.14731	2.82808	3.40674	2.63924	69729	RIKEN cDNA 2410003L11 gene	non_coding			GO:0003674,GO:0005575,GO:0008150	molecular_function|cellular_component|biological_process
2410004B18Rik	927.935	1003.33	852.536	0.849773	-0.23485	0.122103	0.641245	Down	14.0988	14.2442	17.29	15.8481	18.6047	19.9094	66421	RIKEN cDNA 2410004B18 gene	protein_coding			GO:0003674,GO:0005654,GO:0008150	molecular_function|nucleoplasm|biological_process
2410004P03Rik	4.23027	5.21151	3.24903	0.625333	-0.677304	0.561139	0.933099	Down	0.0324325	0.0493527	0.0650595	0.131588	0.0720515	0.0277295	73667	RIKEN cDNA 2410004P03 gene	protein_coding			GO:0003674,GO:0005575,GO:0008150	molecular_function|cellular_component|biological_process
2410006H16Rik	814.362	875.093	753.63	0.861101	-0.215745	0.277744	0.808764	Down	41.3101	40.5669	56.5491	44.0875	51.6283	67.8141	69221	RIKEN cDNA 2410006H16 gene	non_coding			GO:0003674,GO:0005575,GO:0008150	molecular_function|cellular_component|biological_process
2410018L13Rik	3.90535	4.88082	2.92989	0.599419	-0.738362	0.628839	0.946787	Down	0.129937	0.0219696	0.0217212	0	0.153956	0.148127	69732	RIKEN cDNA 2410018L13 gene	non_coding			GO:0003674,GO:0005575,GO:0008150	molecular_function|cellular_component|biological_process
2410022M11Rik	68.8654	59.9018	77.8289	1.29902	0.377422	0.210441	0.759753	Up	1.14802	1.21316	1.08749	0.698679	0.920985	1.07698	100503842	RIKEN cDNA 2410022M11 gene	non_coding			GO:0003674,GO:0005575,GO:0008150	molecular_function|cellular_component|biological_process
2410124H12Rik	2.10136	0.610102	3.59262	5.9139	2.56411	0.214236	0.762065	Up	0	0.087074	0.344357	0	0.0381365	0.0366928	76785	RIKEN cDNA 2410124H12 gene	non_coding			GO:0003674,GO:0005575,GO:0008150	molecular_function|cellular_component|biological_process
2500002B13Rik	77.0886	70.7401	83.4371	1.17738	0.235575	0.50269	0.917853	Up	2.02685	3.18708	2.64281	1.97365	1.56098	3.26371	78353	RIKEN cDNA 2500002B13 gene	non_coding			GO:0003674,GO:0005575,GO:0008150	molecular_function|cellular_component|biological_process
2500004C02Rik	76.5199	71.7854	81.2544	1.13163	0.178404	0.598201	0.939316	Up	0.834803	1.14004	1.65851	1.00309	0.970091	1.27652	72326	RIKEN cDNA 2500004C02 gene	non_coding			GO:0003674,GO:0005575,GO:0008150	molecular_function|cellular_component|biological_process
2510002D24Rik	308.384	331.807	284.96	0.858558	-0.220012	0.235251	0.778061	Down	2.18869	2.57755	2.77747	2.63316	2.71446	3.56363	72307	RIKEN cDNA 2510002D24 gene	protein_coding			GO:0003674,GO:0005575,GO:0008150	molecular_function|cellular_component|biological_process
2510003B16Rik	3.03777	2.1316	3.94394	1.85622	0.892369	0.554523	0.931109	Up	0	0.338445	0.278848	0.0451195	0.148231	0.14262	76786	RIKEN cDNA 2510003B16 gene	non_coding			GO:0003674,GO:0005575,GO:0008150	molecular_function|cellular_component|biological_process
2510009E07Rik	699.451	650.641	748.26	1.15017	0.201851	0.117362	0.631258	Up	4.06546	4.18416	4.01847	3.53358	3.5393	3.69792	72190	RIKEN cDNA 2510009E07 gene	protein_coding			GO:0003674,GO:0005575,GO:0007399	molecular_function|cellular_component|nervous system development
2510022D24Rik	61.1878	60.1109	62.2647	1.03366	0.0477642	0.937805	0.993403	Up	1.20387	1.28446	1.10339	0.421074	0.516454	2.71522	66567	RIKEN cDNA 2510022D24 gene	protein_coding			GO:0003674,GO:0005575,GO:0008150	molecular_function|cellular_component|biological_process
2510039O18Rik	2437.15	2464.41	2409.89	0.977978	-0.0321265	0.82628	0.982143	Down	15.8171	15.2448	15.3086	16.7254	16.5429	14.4298	77034	RIKEN cDNA 2510039O18 gene	protein_coding			GO:0003674,GO:0008150,GO:0016020	molecular_function|biological_process|membrane
2600006K01Rik	5.93688	4.98248	6.89128	1.39091	0.476032	0.664497	0.954101	Up	0.123863	0.0538524	0.15973	0.0143586	0.157241	0.0756443	70319	RIKEN cDNA 2600006K01 gene	non_coding			GO:0003674,GO:0005575,GO:0008150	molecular_function|cellular_component|biological_process
2600014E21Rik	6.8233	4.26547	9.38113	2.20493	1.14073	0.207917	0.757146	Up	0.0119523	0.0242505	0.0159842	0.0113153	0.00708079	0.00510955	102635707	RIKEN cDNA 2600014E21 gene	non_coding
2610008E11Rik	544.455	504.773	584.137	1.15701	0.210404	0.243612	0.781516	Up	3.65298	4.73646	3.32428	3.34428	3.04768	3.84403	72128	RIKEN cDNA 2610008E11 gene	protein_coding	mmu05168	Herpes simplex virus 1 infection	GO:0000122,GO:0000977,GO:0001227	negative regulation of transcription by RNA polymerase II|RNA polymerase II transcription regulatory region sequence-specific DNA binding|DNA-binding transcription repressor activity, RNA polymerase II-specific			R-MMU-212436,R-MMU-73857,R-MMU-74160	Generic Transcription Pathway|RNA Polymerase II Transcription|Gene expression (Transcription)	zf-C2H2
2610020C07Rik	25.6121	25.4664	25.7577	1.00781	0.0112306	0.98507	0.998064	Up	0.423984	0.358433	0.226803	0.412856	0.125589	0.483338	69918	RIKEN cDNA 2610020C07 gene	non_coding			GO:0003674,GO:0005575,GO:0008150	molecular_function|cellular_component|biological_process
2610027K06Rik	16.1179	16.3223	15.9135	0.971843	-0.0412042	0.951863	0.994876	Down	0.183398	0.2525	0.144531	0.0956703	0.151333	0.36961	69909	RIKEN cDNA 2610027K06 gene	non_coding			GO:0003674,GO:0005575,GO:0008150	molecular_function|cellular_component|biological_process
2610035D17Rik	18.2881	17.8202	18.7559	1.05759	0.080779	0.912167	0.990571	Up	0.148394	0.234176	0.479594	0.187314	0.483517	0.140973	72386	RIKEN cDNA 2610035D17 gene	non_coding			GO:0003674,GO:0005575,GO:0008150	molecular_function|cellular_component|biological_process
2610042L04Rik	15.6019	12.6216	18.5822	1.47494	0.560656	0.452273	0.904683	Up	0.161219	0.0676766	0.0557594	0.0902224	0.0741022	0.0285188	554327	RIKEN cDNA 2610042L04 gene	protein_coding			GO:0001933,GO:0005515,GO:0005575,GO:0007416,GO:0010821,GO:0060025	negative regulation of protein phosphorylation|protein binding|cellular_component|synapse assembly|regulation of mitochondrion organization|regulation of synaptic activity
2610044O15Rik8	208.008	223.473	192.544	0.86117	-0.21563	0.328696	0.842986	Down	2.86517	2.69777	3.61372	3.81463	3.00347	3.96059	72139	RIKEN cDNA 2610044O15 gene	protein_coding			GO:0000122,GO:0000978,GO:0001227,GO:0001817,GO:0002682,GO:0005654	negative regulation of transcription by RNA polymerase II|RNA polymerase II cis-regulatory region sequence-specific DNA binding|DNA-binding transcription repressor activity, RNA polymerase II-specific|regulation of cytokine production|regulation of immune system process|nucleoplasm					zf-C2H2
2610203C22Rik	23.7319	36.2004	11.2634	0.310548	-1.68711	0.00258716	0.0779743	Down	0.366818	0.272892	0.122639	0.694535	0.78232	1.02451	72481	RIKEN cDNA 2610203C22 gene	non_coding			GO:0003674,GO:0005575,GO:0008150	molecular_function|cellular_component|biological_process
2610206C17Rik	10.4749	9.7067	11.2432	1.15823	0.211919	0.768794	0.970381	Up	0.230701	0.216037	0.106797	0.129603	0.173469	0.182075	72495	RIKEN cDNA 2610206C17 gene	non_coding			GO:0003674,GO:0005575,GO:0008150	molecular_function|cellular_component|biological_process
2610306M01Rik	73.3268	76.7553	69.8983	0.909094	-0.137499	0.671005	0.955665	Down	1.91545	1.58443	2.21676	1.93691	1.64976	2.82187	67170	RIKEN cDNA 2610306M01 gene	non_coding			GO:0003674,GO:0005575,GO:0008150	molecular_function|cellular_component|biological_process
2610307P16Rik	14.1009	18.4658	9.73591	0.529154	-0.918239	0.185007	0.728985	Down	0.0560941	0.113812	0.13503	0.218487	0.239266	0.115104	72518	RIKEN cDNA 2610307P16 gene	non_coding			GO:0003674,GO:0005575,GO:0008150	molecular_function|cellular_component|biological_process
2610318N02Rik	5.29929	3.3518	7.24678	2.16644	1.11532	0.285943	0.815488	Up	0.127873	0.0926597	0.146579	0.0148234	0.0811659	0.0780932	70458	RIKEN cDNA 2610318N02 gene	protein_coding			GO:0003674,GO:0005575,GO:0008150	molecular_function|cellular_component|biological_process
2610507I01Rik	8.41838	7.80413	9.03263	1.15551	0.208525	0.817335	0.979957	Up	0.0734225	0.117048	0.0736427	0.144693	0.0279624	0.0538077	72203	RIKEN cDNA 2610507I01 gene	non_coding			GO:0003674,GO:0005575,GO:0008150	molecular_function|cellular_component|biological_process
2610524H06Rik	217.038	220.67	213.407	0.965999	-0.0499063	0.824678	0.98192	Down	6.83567	5.82244	6.43575	6.01784	5.41539	8.71153	330173	RIKEN cDNA 2610524H06 gene	protein_coding			GO:0003674,GO:0005575,GO:0008150	molecular_function|cellular_component|biological_process
2610528J11Rik	988.069	1016.65	959.485	0.943964	-0.0831966	0.63296	0.946787	Down	18.6251	24.1135	27.7304	23.9334	26.0454	25.2173	66451	RIKEN cDNA 2610528J11 gene	protein_coding			GO:0003674,GO:0005768,GO:0005886,GO:0016020	molecular_function|endosome|plasma membrane|membrane
2700003A03Rik	6.11009	6.41211	5.80806	0.906925	-0.140945	0.879143	0.988053	Down	0.0427525	0.0309794	0.0245033	0.019824	0.048846	0.0417749	102638195	RIKEN cDNA 2700003A03 gene	non_coding			GO:0003674,GO:0005575,GO:0008150	molecular_function|cellular_component|biological_process
2700012I20Rik	6.86005	5.01571	8.7044	1.72195	0.784043	0.398244	0.879389	Up	0.415693	0.379538	0.20847	0.202391	0.0738798	0.319873	72588	RIKEN cDNA 2700012I20 gene	non_coding			GO:0003674,GO:0005575,GO:0008150	molecular_function|cellular_component|biological_process
2700038G22Rik	52.4808	51.8637	53.0979	1.02219	0.031666	0.945331	0.994653	Up	0.934127	1.69222	0.669234	0.97458	0.711511	1.59734	67194	RIKEN cDNA 2700038G22 gene	non_coding			GO:0003674,GO:0005575,GO:0008150	molecular_function|cellular_component|biological_process
2700046A07Rik	17.347	12.297	22.3969	1.8177	0.862115	0.171766	0.717638	Up	0.257133	0.463742	0.171936	0.127511	0.139637	0.232061	78449	RIKEN cDNA 2700046A07 gene	non_coding			GO:0003674,GO:0005575,GO:0008150	molecular_function|cellular_component|biological_process
2700049A03Rik	313.331	332.651	294.012	0.883334	-0.17897	0.376427	0.869128	Down	1.54242	1.15054	1.4156	1.40295	1.43335	1.89625	76967	RIKEN cDNA 2700049A03 gene	protein_coding			GO:0005515,GO:0005737,GO:0005813,GO:0005814,GO:0005856,GO:0007224,GO:0030030,GO:0036064,GO:0042995,GO:0060271,GO:0070201	protein binding|cytoplasm|centrosome|centriole|cytoskeleton|smoothened signaling pathway|cell projection organization|ciliary basal body|cell projection|cilium assembly|regulation of establishment of protein localization
2700054A10Rik	5.40666	9.00091	1.8124	0.201805	-2.30897	0.0601726	0.469475	Down	0.0140158	0.0142186	0.00702891	0.0852994	0.0747294	0.0119834	72578	RIKEN cDNA 2700054A10 gene	non_coding			GO:0003674,GO:0005575,GO:0008150	molecular_function|cellular_component|biological_process
2700062C07Rik	308.999	320.534	297.463	0.928392	-0.107194	0.50833	0.919287	Down	7.79473	8.50659	8.11425	8.57724	8.99941	8.96165	68046	RIKEN cDNA 2700062C07 gene	protein_coding			GO:0003674,GO:0005575,GO:0008150	molecular_function|cellular_component|biological_process
2700068H02Rik	3.75081	3.18682	4.3148	1.36819	0.452269	0.756812	0.968681	Up	0.0237864	0.120653	0.143146	0.0579051	0.147961	0	72563	RIKEN cDNA 2700068H02 gene	non_coding			GO:0003674,GO:0005575,GO:0008150	molecular_function|cellular_component|biological_process
2700097O09Rik	194.176	207.444	180.909	0.872366	-0.196995	0.448979	0.903077	Down	3.47759	3.07193	5.33881	4.30008	4.79312	4.67235	72658	RIKEN cDNA 2700097O09 gene	protein_coding			GO:0008168	methyltransferase activity
2810001A02Rik	232.793	261.519	204.066	0.78017	-0.35814	0.0443974	0.401814	Down	8.33974	9.50025	8.5984	11.1151	10.5989	12.5479	72146	RIKEN cDNA 2810001A02 gene	non_coding			GO:0003674,GO:0005575,GO:0008150	molecular_function|cellular_component|biological_process
2810001G20Rik	91.4945	86.4287	96.5604	1.11621	0.158614	0.560737	0.933099	Up	2.67165	3.15631	3.2563	2.33259	2.46427	3.46973	66456	RIKEN cDNA 2810001G20 gene	non_coding			GO:0003674,GO:0005575,GO:0008150	molecular_function|cellular_component|biological_process
2810002D19Rik	58.5457	71.7998	45.2917	0.63016	-0.666211	0.0407578	0.385345	Down	0.923965	0.770699	0.885548	1.49952	1.14949	1.49219	66457	RIKEN cDNA 2810002D19 gene	non_coding			GO:0003674,GO:0005575,GO:0008150	molecular_function|cellular_component|biological_process
2810004N23Rik	722.521	693.775	751.266	1.08291	0.114911	0.398604	0.879396	Up	13.8902	16.2161	15.9664	13.0605	14.0675	15.9101	66523	RIKEN cDNA 2810004N23 gene	protein_coding			GO:0003674,GO:0005634,GO:0005694,GO:0008150,GO:0032040,GO:0042274	molecular_function|nucleus|chromosome|biological_process|small-subunit processome|ribosomal small subunit biogenesis
2810013P06Rik	529.628	545.51	513.747	0.941432	-0.0870715	0.656427	0.952662	Down	7.19688	7.24007	7.00749	5.91314	7.14308	10.1741	100503178	RIKEN cDNA 2810013P06 gene	non_coding			GO:0003674,GO:0005575,GO:0008150	molecular_function|cellular_component|biological_process
2810021J22Rik	378.076	406.837	349.315	0.858733	-0.219718	0.240661	0.780107	Down	1.84278	2.08537	1.51123	2.21802	2.07557	2.08798	69944	RIKEN cDNA 2810021J22 gene	protein_coding	mmu05168	Herpes simplex virus 1 infection	GO:0000122,GO:0000977,GO:0001227	negative regulation of transcription by RNA polymerase II|RNA polymerase II transcription regulatory region sequence-specific DNA binding|DNA-binding transcription repressor activity, RNA polymerase II-specific			R-MMU-212436,R-MMU-73857,R-MMU-74160	Generic Transcription Pathway|RNA Polymerase II Transcription|Gene expression (Transcription)	zf-C2H2
2810025M15Rik	238.405	225.907	250.903	1.11045	0.151149	0.457583	0.905682	Up	5.10391	6.60165	6.11746	4.49366	5.23851	6.5457	69953	RIKEN cDNA 2810025M15 gene	non_coding			GO:0003674,GO:0005575,GO:0008150	molecular_function|cellular_component|biological_process
2810029C07Rik	134.182	112.71	155.654	1.37837	0.462964	0.123834	0.64454	Up	2.19873	2.19891	2.34609	1.36661	1.15015	2.4932	100504687	RIKEN cDNA 2810029C07 gene	non_coding			GO:0003674,GO:0005575,GO:0008150	molecular_function|cellular_component|biological_process
2810030D12Rik	15.484	14.4001	16.5678	1.14612	0.196755	0.794316	0.976159	Up	0.396362	1.20629	0.695714	0.442244	0.308193	1.31319	78335	RIKEN cDNA 2810030D12 gene	non_coding			GO:0003674,GO:0005575,GO:0008150	molecular_function|cellular_component|biological_process
2810032G03Rik	35.2775	47.797	22.7579	0.475567	-1.07228	0.0235337	0.288918	Down	0.253919	0.40912	0.284643	0.472693	0.530921	1.03441	72669	RIKEN cDNA 2810032G03 gene	non_coding			GO:0003674,GO:0005575,GO:0008150	molecular_function|cellular_component|biological_process
2810039B14Rik	7.37729	8.64765	6.10693	0.709673	-0.494774	0.616218	0.944916	Down	0.0181804	0.147548	0.145879	0.162279	0.193868	0.0777205	72665	RIKEN cDNA 2810039B14 gene	protein_coding			GO:0003674,GO:0005575,GO:0008150	molecular_function|cellular_component|biological_process
2810047C21Rik1	28.353	34.7346	21.9715	0.633823	-0.657847	0.211148	0.759753	Down	0.109141	0.332163	0.169179	0.314	0.352679	0.296912	105242405	RIKEN cDNA 2810047C21 gene 1	non_coding			GO:0003674,GO:0005575,GO:0008150	molecular_function|cellular_component|biological_process
2810403D21Rik	45.8606	40.3009	51.4203	1.27598	0.351604	0.324024	0.840098	Up	1.42498	1.19954	1.70294	1.08251	1.13157	1.21835	69964	RIKEN cDNA 2810403D21 gene	non_coding			GO:0003674,GO:0005575,GO:0009611	molecular_function|cellular_component|response to wounding
2810408A11Rik	9.24155	9.05443	9.42867	1.04003	0.0566251	0.942224	0.994304	Up	0.160064	0.16238	0.0583796	0.10627	0.116377	0.149295	70419	RIKEN cDNA 2810408A11 gene	protein_coding			GO:0004864,GO:0043666	protein phosphatase inhibitor activity|regulation of phosphoprotein phosphatase activity
2810408B13Rik	15.5238	19.1529	11.8947	0.620493	-0.688512	0.276462	0.808112	Down	0.0113617	0.0268944	0.024691	0.030732	0.0252411	0.046952	76371	RIKEN cDNA 2810408B13 gene	protein_coding			GO:0003674,GO:0005575,GO:0008150	molecular_function|cellular_component|biological_process
2810408I11Rik	27.7286	24.4608	30.9964	1.26736	0.341824	0.519683	0.922674	Up	0.683766	1.6908	1.32877	1.31777	0.721546	0.876922	69941	RIKEN cDNA 2810408I11 gene	non_coding			GO:0003674,GO:0005575,GO:0008150	molecular_function|cellular_component|biological_process
2810414N06Rik	21.9287	25.7669	18.0904	0.700845	-0.512832	0.349931	0.851911	Down	0.352858	0.484305	0.208186	0.488446	0.368896	0.656621	102640772	RIKEN cDNA 2810414N06 gene	non_coding			GO:0003674,GO:0005575,GO:0008150	molecular_function|cellular_component|biological_process
2810429I04Rik	2.38748	1.8898	2.88516	1.54513	0.627731	0.680165	0.956621	Up	0.0350234	0.0888255	0.0175642	0.01421	0.0622459	0.0149724	76937	RIKEN cDNA 2810429I04 gene	non_coding			GO:0005575,GO:0035198,GO:0060038	cellular_component|miRNA binding|cardiac muscle cell proliferation
2810433D01Rik	28.0696	18.5909	37.5483	2.02392	1.01715	0.0376018	0.369548	Up	0.571033	0.950047	0.870573	0.50044	0.385654	0.292937	77132	RIKEN cDNA 2810433D01 gene	non_coding			GO:0003674,GO:0005575,GO:0008150	molecular_function|cellular_component|biological_process
2810442N19Rik	1.27392	0	2.54785	15.2152	3.92744	0.171264	0.716601	Up	0.132624	0.100907	0	0	0	0	72753	RIKEN cDNA 2810442N19 gene	non_coding			GO:0003674,GO:0005575,GO:0008150	molecular_function|cellular_component|biological_process
2810454H06Rik	7.08627	7.31826	6.85427	0.938397	-0.0917297	0.9252	0.991894	Down	0.0539298	0.131305	0.0216366	0.105029	0.0670933	0.0461096	72813	RIKEN cDNA 2810454H06 gene	non_coding			GO:0003674,GO:0005575,GO:0008150	molecular_function|cellular_component|biological_process
2810459M11Rik	391.995	453.741	330.249	0.72796	-0.458069	0.209451	0.758873	Down	2.20455	1.46622	4.71592	3.46646	4.45457	3.69935	72792	RIKEN cDNA 2810459M11 gene	protein_coding			GO:0005515,GO:0005575,GO:0008150	protein binding|cellular_component|biological_process
2900005J15Rik	7.6935	6.34738	9.03963	1.42358	0.509519	0.548386	0.929493	Up	0.119903	0.182457	0.0751641	0.121621	0.0665936	0.0768871	67261	RIKEN cDNA 2900005J15 gene	non_coding			GO:0003674,GO:0005575,GO:0008150	molecular_function|cellular_component|biological_process
2900009J06Rik	6.9981	8.94666	5.04953	0.566559	-0.819701	0.417428	0.887668	Down	0.131338	0.133238	0.658657	0.373013	0.816977	0.449171	100502745	RIKEN cDNA 2900009J06 gene	non_coding			GO:0003674,GO:0005575,GO:0008150	molecular_function|cellular_component|biological_process
2900024J01Rik	2.86682	2.10675	3.62689	1.7169	0.77981	0.537817	0.927616	Up	0.0926854	0.07052	0.0697225	0.0376053	0.0411817	0.059434	102634584	RIKEN cDNA 2900024J01 gene	non_coding			GO:0003674,GO:0005575,GO:0008150	molecular_function|cellular_component|biological_process
2900026A02Rik	3849.41	3706.69	3992.12	1.07695	0.106955	0.564304	0.933157	Up	9.51852	10.037	7.12471	9.34207	6.82749	8.8581	243219	RIKEN cDNA 2900026A02 gene	protein_coding			GO:0003674,GO:0005575,GO:0008150	molecular_function|cellular_component|biological_process
2900041M22Rik	3.62037	4.70689	2.53385	0.535552	-0.900901	0.491529	0.914073	Down	0.0453427	0.0229995	0.0909575	0.128778	0.0201465	0.155071	78403	RIKEN cDNA 2900041M22 gene	non_coding			GO:0003674,GO:0005575,GO:0008150	molecular_function|cellular_component|biological_process
2900052L18Rik	18.3249	11.4203	25.2296	2.20614	1.14153	0.0610552	0.472928	Up	0.0723883	0.188835	0.103722	0.0503488	0.0459477	0.0707331	102640779	RIKEN cDNA 2900052L18 gene	non_coding			GO:0003674,GO:0005575,GO:0008150	molecular_function|cellular_component|biological_process
2900060B14Rik	6.49591	8.64765	4.34416	0.504207	-0.987911	0.286949	0.81635	Down	0.204156	0.207111	0.204769	0.455578	0.54426	0.21819	68204	RIKEN cDNA 2900060B14 gene	non_coding			GO:0003674,GO:0005575,GO:0008150	molecular_function|cellular_component|biological_process
2900076A07Rik	111.483	111.163	111.802	1.00424	0.00609955	0.982733	0.997617	Up	3.39751	3.51924	4.19685	3.80168	2.66956	4.77007	100504421	RIKEN cDNA 2900076A07 gene	non_coding			GO:0003674,GO:0005575,GO:0008150	molecular_function|cellular_component|biological_process
2900089D17Rik	20.0636	20.2307	19.8965	0.983075	-0.0246262	0.963865	0.995359	Down	0.0631918	0.0600997	0.0950721	0.0512777	0.0772123	0.0979268	67277	RIKEN cDNA 2900089D17 gene	non_coding			GO:0003674,GO:0005575,GO:0008150	molecular_function|cellular_component|biological_process
2900093K20Rik	35.6439	37.2594	34.0283	0.911904	-0.133047	0.753528	0.96859	Down	1.54672	1.35989	1.96505	1.38061	1.60354	2.46854	108168734	RIKEN cDNA 2900093K20 gene	non_coding			GO:0003674,GO:0005575,GO:0008150	molecular_function|cellular_component|biological_process
3010001F23Rik	6.20611	5.90225	6.50996	1.09688	0.133408	0.893721	0.989286	Up	0.158976	0.241914	0.0797262	0.172003	0.0470903	0.226538	75693	RIKEN cDNA 3010001F23 gene	non_coding			GO:0003674,GO:0005575,GO:0008150	molecular_function|cellular_component|biological_process
3010003L21Rik	23.9922	28.1242	19.8601	0.70844	-0.497283	0.400807	0.881597	Down	0.208107	0.263898	0.487039	0.450321	0.631847	0.266895	109163	RIKEN cDNA 3010003L21 gene	non_coding			GO:0003674,GO:0005575,GO:0008150	molecular_function|cellular_component|biological_process
3110009E18Rik	59.3227	62.0793	56.566	0.912374	-0.132303	0.7522	0.968385	Down	0.146087	0.381902	0.360677	0.259884	0.374474	0.345885	73103	RIKEN cDNA 3110009E18 gene	protein_coding			GO:0003674,GO:0005575,GO:0008150	molecular_function|cellular_component|biological_process
3110021A11Rik	4.62169	7.80185	1.44154	0.184927	-2.43497	0.0599874	0.469475	Down	0.0364042	0.110793	0	0.354487	0.16175	0.280128	67289	RIKEN cDNA 3110021A11 gene	non_coding			GO:0003674,GO:0005575,GO:0008150	molecular_function|cellular_component|biological_process
3110040N11Rik	327.005	323.273	330.737	1.02347	0.0334755	0.851942	0.98672	Up	6.19118	8.10343	8.0605	6.69853	7.50819	7.84671	67290	RIKEN cDNA 3110040N11 gene	protein_coding			GO:0003674,GO:0005737,GO:0008150	molecular_function|cytoplasm|biological_process
3110045C21Rik	8.1089	13.686	2.53176	0.184362	-2.43939	0.027574	0.313921	Down	0.0536922	0.0544692	0.0807798	0.108923	0.143138	0.826316	67303	RIKEN cDNA 3110045C21 gene	non_coding			GO:0003674,GO:0005575,GO:0008150	molecular_function|cellular_component|biological_process
3110053B16Rik	114.434	122.591	106.278	0.865585	-0.208252	0.519126	0.922643	Down	1.61839	1.10397	1.38535	1.24533	1.25218	2.37378	382686	RIKEN cDNA 3110053B16 gene	non_coding			GO:0003674,GO:0005575,GO:0008150	molecular_function|cellular_component|biological_process
3110056K07Rik	185.086	198.228	171.944	0.866971	-0.205944	0.435814	0.896001	Down	2.3778	3.63776	3.17349	2.81643	3.10132	4.86936	73204	RIKEN cDNA 3110056K07 gene	non_coding			GO:0003674,GO:0005575,GO:0008150	molecular_function|cellular_component|biological_process
3110070M22Rik	24.3967	24.149	24.6444	1.01719	0.0245924	0.962642	0.995359	Up	0.70233	0.657687	0.487687	0.438395	0.456083	0.970017	67304	RIKEN cDNA 3110070M22 gene	non_coding			GO:0003674,GO:0005575,GO:0008150	molecular_function|cellular_component|biological_process
3110082I17Rik	171.213	212.565	129.862	0.611136	-0.710435	0.000836627	0.0371143	Down	1.70787	1.82974	2.22529	2.94012	3.21973	3.37078	73212	RIKEN cDNA 3110082I17 gene	protein_coding			GO:0003674,GO:0005575,GO:0008150	molecular_function|cellular_component|biological_process
3110083C13Rik	15.782	12.6676	18.8964	1.48873	0.574081	0.343765	0.848824	Up	0.833851	0.422959	0.557568	0.451092	0.33962	0.445585	73208	RIKEN cDNA 3110083C13 gene	non_coding			GO:0003674,GO:0005575,GO:0008150	molecular_function|cellular_component|biological_process
3300002I08Rik	411.576	438.523	384.63	0.876956	-0.189424	0.512684	0.919634	Down	0.551813	0.651223	0.279515	0.511903	0.518697	0.685171	69277	RIKEN cDNA 3300002I08 gene	protein_coding			GO:0003674,GO:0005575,GO:0008150	molecular_function|cellular_component|biological_process
3300005D01Rik	104.376	85.7427	123.009	1.43719	0.523247	0.225256	0.771668	Up	2.28349	1.78566	4.05581	1.40902	2.91695	1.34225	78512	RIKEN cDNA 3300005D01 gene	non_coding			GO:0009611	response to wounding
3425401B19Rik	24.2196	23.773	24.6661	1.03813	0.053989	0.930688	0.992819	Up	0.128675	0.134889	0.0301143	0.097454	0.102911	0.084346	100504518	RIKEN cDNA 3425401B19 gene	protein_coding			GO:0003674,GO:0005737,GO:0030018,GO:0070886	molecular_function|cytoplasm|Z disc|positive regulation of calcineurin-NFAT signaling cascade
3632454L22Rik	119.476	104.197	134.755	1.29198	0.369589	0.292334	0.81943	Up	0.59222	0.936527	0.652232	0.739691	0.325047	0.635412	320606	RIKEN cDNA 3632454L22 gene	non_coding			GO:0003674,GO:0005575,GO:0008150	molecular_function|cellular_component|biological_process
3830403N18Rik	102.267	83.5877	120.946	1.44561	0.531682	0.112379	0.617787	Up	3.3285	1.97161	2.17338	2.15713	1.34988	1.71897	70691	RIKEN cDNA 3830403N18 gene	protein_coding			GO:0000795,GO:0002244,GO:0003674,GO:0007286,GO:0051321	synaptonemal complex|hematopoietic progenitor cell differentiation|molecular_function|spermatid development|meiotic cell cycle
3830406C13Rik	417.842	421.195	414.489	0.983937	-0.0233623	0.888063	0.989145	Down	1.29231	1.4541	1.64795	1.38584	1.41262	1.72419	218734	RIKEN cDNA 3830406C13 gene	protein_coding			GO:0003674,GO:0005575,GO:0008150,GO:0042995	molecular_function|cellular_component|biological_process|cell projection
3830408C21Rik	15.7415	16.2673	15.2157	0.930923	-0.103267	0.873186	0.987502	Down	0.240809	0.211721	0.225429	0.234488	0.114128	0.398053	100040322	RIKEN cDNA 3830408C21 gene	non_coding			GO:0003674,GO:0005575,GO:0008150	molecular_function|cellular_component|biological_process
3830432H09Rik	32.4506	36.6229	28.2783	0.771698	-0.373891	0.379644	0.870876	Down	0.391292	0.35854	0.240544	0.440429	0.403799	0.453264	320069	RIKEN cDNA 3830432H09 gene	non_coding			GO:0003674,GO:0005575,GO:0008150	molecular_function|cellular_component|biological_process
3930402G23Rik	90.2625	141.078	39.4472	0.279807	-1.83749	2.59266e-05	0.0026879	Down	0.306284	0.190439	0.584676	0.954063	1.74718	1.19954	665306	RIKEN cDNA 3930402G23 gene	non_coding			GO:0003674,GO:0005575,GO:0008150	molecular_function|cellular_component|biological_process
4631405J19Rik	2.27843	0.610102	3.94675	6.50191	2.70086	0.152737	0.69299	Up	0.0247525	0.225996	0.0248267	0	0.0219959	0.0211632	433456	RIKEN cDNA 4631405J19 gene	non_coding			GO:0003674,GO:0005575,GO:0008150	molecular_function|cellular_component|biological_process
4632404H12Rik	36.2178	40.6144	31.8213	0.781723	-0.355271	0.406868	0.883987	Down	0.268461	0.335195	0.310692	0.393798	0.256914	0.538518	74034	RIKEN cDNA 4632404H12 gene	non_coding			GO:0003674,GO:0005575,GO:0008150	molecular_function|cellular_component|biological_process
4632427E13Rik	12.6726	14.51	10.8352	0.746842	-0.421125	0.545527	0.928885	Down	0.318822	0.415847	0.639557	0.887012	0.445211	0.50624	666737	RIKEN cDNA 4632427E13 gene	non_coding			GO:0003674,GO:0005575,GO:0008150	molecular_function|cellular_component|biological_process
4632428C04Rik	27.6486	38.3145	16.9827	0.444337	-1.17027	0.0169601	0.241374	Down	0.150595	0.190967	0.251744	0.417522	0.557598	0.364812	100043102	RIKEN cDNA 4632428C04 gene	non_coding			GO:0003674,GO:0005575,GO:0008150	molecular_function|cellular_component|biological_process
4732416N19Rik	9.24805	8.32152	10.1746	1.22666	0.29473	0.710777	0.961661	Up	0.7189	0.392702	0.443727	0.493612	0.540556	0.236406	320737	RIKEN cDNA 4732416N19 gene	non_coding			GO:0003674,GO:0005575,GO:0008150	molecular_function|cellular_component|biological_process
4732419C18Rik	67.2287	94.216	40.2415	0.427134	-1.22724	0.00126117	0.0489526	Down	0.420833	0.31511	0.381896	0.528496	1.06848	1.07086	100042484	RIKEN cDNA 4732419C18 gene	non_coding			GO:0003674,GO:0005575,GO:0008150	molecular_function|cellular_component|biological_process
4732465J04Rik	2.15922	2.51723	1.80122	0.722803	-0.468325	0.76395	0.969848	Down	0.0505312	0.153787	0.0506828	0.0820082	0.224519	0.0432038	414105	RIKEN cDNA 4732465J04 gene	non_coding			GO:0003674,GO:0005575,GO:0008150	molecular_function|cellular_component|biological_process
4732471J01Rik	7.76877	7.197	8.34054	1.15621	0.209408	0.821889	0.981214	Up	0.0704028	0.0785638	0.0141228	0.0285645	0.0437936	0.0722326	654804	RIKEN cDNA 4732471J01 gene	non_coding			GO:0003674,GO:0005575,GO:0008150	molecular_function|cellular_component|biological_process
4732491K20Rik	67.6929	76.2566	59.1292	0.775121	-0.367507	0.335085	0.845218	Down	0.297599	0.652506	0.635499	0.66215	0.537444	0.870038	224523	RIKEN cDNA 4732491K20 gene	non_coding			GO:0003674,GO:0005575,GO:0008150	molecular_function|cellular_component|biological_process
4831440E17Rik	31.117	38.0632	24.1708	0.634191	-0.657011	0.249444	0.788135	Down	0.104239	0.231322	0.104551	0.137452	0.173682	0.401056	320965	RIKEN cDNA 4831440E17 gene	non_coding			GO:0003674,GO:0005575,GO:0008150	molecular_function|cellular_component|biological_process
4833407H14Rik	16.684	9.52822	23.8397	2.49188	1.31723	0.0538942	0.444043	Up	0.376487	0.43286	0.855929	0.122202	0.178431	0.386272	73899	RIKEN cDNA 4833407H14 gene	non_coding			GO:0003674,GO:0005575,GO:0008150	molecular_function|cellular_component|biological_process
4833411C07Rik	8.69952	11.9919	5.40712	0.452462	-1.14413	0.205958	0.755018	Down	0.0506994	0.0771496	0.254257	0.287984	0.360425	0.195064	71624	RIKEN cDNA 4833411C07 gene	non_coding
4833412C05Rik	14.1348	15.2594	13.0101	0.854598	-0.226682	0.708253	0.961661	Down	0.281351	0.399592	0.338634	0.342458	0.475034	0.384885	73904	RIKEN cDNA 4833412C05 gene	non_coding			GO:0003674,GO:0005575,GO:0008150	molecular_function|cellular_component|biological_process
4833417C18Rik	6.38155	9.83321	2.92989	0.297206	-1.75046	0.103072	0.5999	Down	0.138606	0.0234354	0.0231704	0.168711	0.287398	0.177761	73906	RIKEN cDNA 4833417C18 gene	non_coding			GO:0003674,GO:0005575,GO:0008150	molecular_function|cellular_component|biological_process
4833418N02Rik	22.973	23.9403	22.0057	0.920023	-0.120258	0.819376	0.980456	Down	0.238983	0.424272	0.559299	0.500973	0.407039	0.425685	74597	RIKEN cDNA 4833418N02 gene	non_coding			GO:0003674,GO:0005575,GO:0008150	molecular_function|cellular_component|biological_process
4833419F23Rik	39.8262	44.6275	35.0249	0.783362	-0.352249	0.453778	0.905099	Down	0.795479	1.22803	1.3529	1.03841	1.01423	2.36567	73915	RIKEN cDNA 4833419F23 gene	non_coding			GO:0003674,GO:0005575,GO:0008150	molecular_function|cellular_component|biological_process
4833420G17Rik	999.662	964.763	1034.56	1.07215	0.100512	0.516552	0.921254	Up	8.30741	10.3602	9.60286	7.84872	8.0716	10.8305	67392	RIKEN cDNA 4833420G17 gene	protein_coding			GO:0003674,GO:0005575,GO:0008150	molecular_function|cellular_component|biological_process
4833422C13Rik	108.99	135.706	82.2745	0.606775	-0.720767	0.153137	0.693049	Down	0.499069	0.550316	0.190433	0.721911	1.00267	0.301473	373852	RIKEN cDNA 4833422C13 gene	non_coding			GO:0003674,GO:0005575,GO:0008150	molecular_function|cellular_component|biological_process
4833438C02Rik	54.4653	50.4307	58.5	1.16297	0.217817	0.603796	0.941202	Up	0.630538	0.864409	1.28195	0.691428	1.0752	0.626528	100503392	RIKEN cDNA 4833438C02 gene	non_coding			GO:0003674,GO:0005575,GO:0008150	molecular_function|cellular_component|biological_process
4833439F03Rik	18.8643	19.2673	18.4613	0.957207	-0.0630969	0.917047	0.991257	Down	0.23142	0.28694	0.141848	0.125192	0.239922	0.340763	105246973	RIKEN cDNA 4833439F03 gene	non_coding			GO:0003674,GO:0005575,GO:0008150	molecular_function|cellular_component|biological_process
4833439L19Rik	2322.88	2636.77	2008.99	0.761941	-0.39225	0.0194137	0.260712	Down	13.2366	12.0174	15.3648	14.4749	19.52	20.0509	97820	RIKEN cDNA 4833439L19 gene	protein_coding			GO:0003674,GO:0005737,GO:0008150,GO:0016491	molecular_function|cytoplasm|biological_process|oxidoreductase activity
4833447I15Rik	8.71978	10.5497	6.88991	0.649875	-0.621766	0.521437	0.923201	Down	0.244251	0.247786	0.0918689	0.34685	0.0542624	0.522082	74844	RIKEN cDNA 4833447I15 gene	non_coding			GO:0003674,GO:0005575,GO:0008150	molecular_function|cellular_component|biological_process
4921507P07Rik	29.1002	28.0454	30.155	1.07202	0.100329	0.854716	0.98672	Up	0.378885	0.212414	0.240013	0.355995	0.124044	0.306894	70821	RIKEN cDNA 4921507P07 gene	protein_coding			GO:0003674,GO:0005737,GO:0005813,GO:0005856,GO:0008150	molecular_function|cytoplasm|centrosome|cytoskeleton|biological_process
4921515G04Rik	4.06774	5.25522	2.88026	0.545987	-0.873063	0.513559	0.919927	Down	0.00555723	0.016913	0.0222956	0.00450948	0.014815	0.0665195	115488525	RIKEN cDNA 4921515G04 gene	non_coding			GO:0003674,GO:0005575,GO:0008150	molecular_function|cellular_component|biological_process
4921524J17Rik	759.78	726.367	793.193	1.09188	0.12682	0.334182	0.845218	Up	13.3917	14.8064	13.93	11.8124	12.5114	14.7491	66714	RIKEN cDNA 4921524J17 gene	protein_coding			GO:0003674,GO:0005575,GO:0008150	molecular_function|cellular_component|biological_process
4921525O09Rik	4.43036	4.52984	4.33088	0.956411	-0.064298	0.955923	0.995352	Down	0.0279373	0.0566833	0.0280211	0.00755668	0.0496521	0.0636966	74050	RIKEN cDNA 4921525O09 gene	non_coding			GO:0003674,GO:0005575,GO:0008150	molecular_function|cellular_component|biological_process
4921531C22Rik	78.8682	75.4762	82.2602	1.09052	0.125016	0.71913	0.96315	Up	0.831736	1.70377	1.13905	1.29792	1.02338	1.05302	66730	RIKEN cDNA 4921531C22 gene	non_coding			GO:0003674,GO:0005575,GO:0008150	molecular_function|cellular_component|biological_process
4921536K21Rik	17.2881	21.6241	12.9521	0.600412	-0.735975	0.255884	0.795371	Down	0.0581939	0.236144	0.128411	0.245555	0.248223	0.208972	67430	RIKEN cDNA 4921536K21 gene	protein_coding			GO:0003674,GO:0005575,GO:0008150	molecular_function|cellular_component|biological_process
4930405A21Rik	50.3988	49.2559	51.5417	1.04675	0.0659144	0.883069	0.989101	Up	0.918703	2.45426	1.04432	1.41643	1.27901	1.54479	74846	RIKEN cDNA 4930405A21 gene	non_coding			GO:0003674,GO:0005575,GO:0008150	molecular_function|cellular_component|biological_process
4930405D11Rik	50.489	57.7512	43.2268	0.749348	-0.416291	0.524156	0.924436	Down	0.362382	0.643347	2.63515	1.64183	2.03949	1.16188	73922	RIKEN cDNA 4930405D11 gene	non_coding			GO:0003674,GO:0005575,GO:0008150	molecular_function|cellular_component|biological_process
4930412C18Rik	14.1745	14.2215	14.1276	0.992984	-0.0101571	0.98633	0.9986	Down	0.107479	0.101246	0.0924012	0.087215	0.102332	0.118149	320152	RIKEN cDNA 4930412C18 gene	non_coding			GO:0003674,GO:0005575,GO:0008150	molecular_function|cellular_component|biological_process
4930412M03Rik	5.02573	6.78424	3.26721	0.479942	-1.05907	0.437627	0.896739	Down	0.0404116	0.0307473	0.0202664	0	0.0538666	0.146844	100504140	RIKEN cDNA 4930412M03 gene	non_coding			GO:0003674,GO:0005575,GO:0008150	molecular_function|cellular_component|biological_process
4930413G21Rik	2.36221	2.18357	2.54085	1.17071	0.227383	0.885194	0.989117	Up	0.0652004	0.044096	0.0435973	0.0705434	0.0579393	0	73951	RIKEN cDNA 4930413G21 gene	non_coding			GO:0003674,GO:0005575,GO:0008150	molecular_function|cellular_component|biological_process
4930417H01Rik	3.86144	5.91958	1.80331	0.303919	-1.71824	0.173871	0.719685	Down	0.00941314	0.0190987	0.0188827	0.0687455	0.0167297	0.0724335	414106	RIKEN cDNA 4930417H01 gene	non_coding			GO:0003674,GO:0005575,GO:0008150	molecular_function|cellular_component|biological_process
4930426I24Rik	7.3774	6.02876	8.72605	1.44415	0.530217	0.552173	0.930772	Up	0.148045	0.0409602	0.13499	0.0873691	0.0597989	0.0805492	100504512	RIKEN cDNA 4930426I24 gene	non_coding			GO:0003674,GO:0005575,GO:0008150	molecular_function|cellular_component|biological_process
4930426L09Rik	13.5156	13.6776	13.3537	0.980872	-0.0278631	0.971673	0.996904	Down	0.164039	0.270422	0.329063	0.0831947	0.473756	0.22791	74629	RIKEN cDNA 4930426L09 gene	non_coding			GO:0003674,GO:0005575,GO:0008150	molecular_function|cellular_component|biological_process
4930429B21Rik	11.5986	10.2227	12.9745	1.26849	0.343107	0.64672	0.949494	Up	0.109381	0.285335	0.172399	0.0760783	0.152742	0.227119	67576	RIKEN cDNA 4930429B21 gene	non_coding			GO:0003674,GO:0005575,GO:0008150	molecular_function|cellular_component|biological_process
4930431P22Rik	14.0215	18.606	9.43704	0.507385	-0.978848	0.12179	0.640746	Down	0.470089	0.303477	0.342908	0.797596	0.797498	0.621153	73883	RIKEN cDNA 4930431P22 gene	non_coding			GO:0003674,GO:0005575,GO:0008150	molecular_function|cellular_component|biological_process
4930438A08Rik	3.6664	3.3616	3.9712	1.1852	0.245126	0.832799	0.983669	Up	0.0373869	0.0758559	0.0249994	0.0404507	0.0442977	0.0319655	73988	RIKEN cDNA 4930438A08 gene	protein_coding	mmu00250,mmu00270,mmu00280,mmu00350,mmu00360,mmu00380,mmu00400	Alanine, aspartate and glutamate metabolism|Cysteine and methionine metabolism|Valine, leucine and isoleucine degradation|Tyrosine metabolism|Phenylalanine metabolism|Tryptophan metabolism|Phenylalanine, tyrosine and tryptophan biosynthesis	GO:0001716,GO:0005575,GO:0009063,GO:0046592	L-amino-acid oxidase activity|cellular_component|amino acid catabolic process|polyamine oxidase activity
4930444M15Rik	17.1462	19.1543	15.1381	0.791558	-0.337234	0.615364	0.944441	Down	0.110267	0.205081	0.460822	0.253518	0.375615	0.361395	75789	RIKEN cDNA 4930444M15 gene	non_coding			GO:0003674,GO:0005575,GO:0008150	molecular_function|cellular_component|biological_process
4930445E18Rik	104.578	104.317	104.838	1.00448	0.00645397	0.981501	0.997617	Up	0.23401	0.331251	0.229254	0.289251	0.217621	0.29081	78115	RIKEN cDNA 4930445E18 gene	non_coding			GO:0003674,GO:0005575,GO:0008150	molecular_function|cellular_component|biological_process
4930445K14Rik	46.013	48.5223	43.5038	0.895427	-0.159353	0.669069	0.955095	Down	0.76388	0.551064	0.732119	0.619858	0.724063	0.986924	105244413	RIKEN cDNA 4930445K14 gene	non_coding			GO:0003674,GO:0005575,GO:0008150	molecular_function|cellular_component|biological_process
4930447C04Rik	70.0578	62.7652	77.3504	1.22945	0.298018	0.486492	0.913589	Up	0.609007	0.850769	0.690943	0.607605	0.266156	0.913353	75801	RIKEN cDNA 4930447C04 gene	protein_coding			GO:0000801,GO:0003674,GO:0005694,GO:0006310,GO:0007129,GO:0007130,GO:0007275,GO:0007283,GO:0010705,GO:0030154,GO:0048477,GO:0051090,GO:0051321	central element|molecular_function|chromosome|DNA recombination|homologous chromosome pairing at meiosis|synaptonemal complex assembly|multicellular organism development|spermatogenesis|meiotic DNA double-strand break processing involved in reciprocal meiotic recombination|cell differentiation|oogenesis|regulation of DNA-binding transcription factor activity|meiotic cell cycle
4930447F24Rik	100.902	110.203	91.6014	0.832506	-0.264467	0.482917	0.912803	Down	1.0559	2.1205	2.33427	1.69616	2.98727	1.95297	76873	RIKEN cDNA 4930447F24 gene	non_coding			GO:0003674,GO:0005575,GO:0008150	molecular_function|cellular_component|biological_process
4930447K03Rik	2.3747	1.86495	2.88444	1.55935	0.640946	0.676462	0.956026	Up	0.0294969	0.0299238	0.177512	0.0478712	0.0786359	0.0252196	432745	RIKEN cDNA 4930447K03 gene	non_coding			GO:0003674,GO:0005575,GO:0008150	molecular_function|cellular_component|biological_process
4930448E22Rik	2.20316	2.97597	1.43035	0.481137	-1.05548	0.566906	0.933602	Down	0	0.0575629	0	0.0345328	0.0252113	0.0606422	102633321	RIKEN cDNA 4930448E22 gene	non_coding			GO:0003674,GO:0005575,GO:0008150	molecular_function|cellular_component|biological_process
4930453L07Rik	1.5523	0.567932	2.53666	4.37079	2.12789	0.376385	0.869128	Up	0.0635239	0.0859243	0	0	0	0.0362083	74688	RIKEN cDNA 4930453L07 gene	non_coding			GO:0003674,GO:0005575,GO:0008150	molecular_function|cellular_component|biological_process
4930453N24Rik	989.367	1008.92	969.809	0.961282	-0.056968	0.6514	0.951018	Down	4.22958	5.00592	4.54455	4.53058	4.71634	5.24095	67609	RIKEN cDNA 4930453N24 gene	protein_coding			GO:0003674,GO:0005634,GO:0006915,GO:0043065	molecular_function|nucleus|apoptotic process|positive regulation of apoptotic process
4930471E19Rik	6.30049	4.32269	8.27829	1.92641	0.945911	0.372577	0.866629	Up	0.0357633	0.108843	0.269029	0.0435307	0.111232	0.0611547	74912	RIKEN cDNA 4930471E19 gene	non_coding			GO:0003674,GO:0005575,GO:0008150	molecular_function|cellular_component|biological_process
4930473A02Rik	4.05728	4.8138	3.30075	0.683353	-0.549297	0.706904	0.961661	Down	0.151378	0	0.0433807	0.0175482	0.115303	0.166407	321014	RIKEN cDNA 4930473A02 gene	non_coding			GO:0003674,GO:0005575,GO:0008150	molecular_function|cellular_component|biological_process
4930480K23Rik	21.6605	24.2046	19.1164	0.790271	-0.33958	0.571109	0.934073	Down	0.10549	0.255193	0.0732504	0.164617	0.180273	0.208138	75016	RIKEN cDNA 4930480K23 gene	non_coding			GO:0003674,GO:0005575,GO:0008150	molecular_function|cellular_component|biological_process
4930481A15Rik	26.86	49.4073	4.31271	0.0876937	-3.51138	1.62361e-08	7.59154e-06	Down	0.0140741	0.0856663	0.0705813	0.63955	0.63784	0.67386	74931	RIKEN cDNA 4930481A15 gene	non_coding			GO:0003674,GO:0005575,GO:0008150	molecular_function|cellular_component|biological_process
4930481B07Rik	33.6661	31.5132	35.819	1.13287	0.17998	0.699824	0.960323	Up	0.130683	0.145404	0.14376	0.0957821	0.0824146	0.201841	108168883	RIKEN cDNA 4930481B07 gene	non_coding			GO:0003674,GO:0005575,GO:0008150	molecular_function|cellular_component|biological_process
4930483J18Rik	1.55527	2.02241	1.08813	0.5338	-0.905628	0.668141	0.955048	Down	0.0278522	0	0.0558715	0.0452019	0	0.119067	67638	RIKEN cDNA 4930483J18 gene	non_coding			GO:0003674,GO:0005575,GO:0008150	molecular_function|cellular_component|biological_process
4930486L24Rik	1328.13	627.366	2028.9	3.23403	1.69333	1.6536e-08	7.59154e-06	Up	25.6989	40.412	59.4095	8.46392	14.1597	16.8113	214639	RIKEN cDNA 4930486L24 gene	protein_coding			GO:0004197,GO:0005576,GO:0005615,GO:0005764,GO:0006508,GO:0006955,GO:0008234,GO:0008656,GO:0010952,GO:0030054,GO:0051603,GO:2001235	cysteine-type endopeptidase activity|extracellular region|extracellular space|lysosome|proteolysis|immune response|cysteine-type peptidase activity|cysteine-type endopeptidase activator activity involved in apoptotic process|positive regulation of peptidase activity|cell junction|proteolysis involved in protein catabolic process|positive regulation of apoptotic signaling pathway
4930500F10Rik	18.6614	26.1299	11.1928	0.428131	-1.22388	0.0373077	0.367694	Down	0.0952197	0.137997	0.191011	0.397373	0.229671	0.37217	102636338	RIKEN cDNA 4930500F10 gene	non_coding			GO:0003674,GO:0005575,GO:0008150	molecular_function|cellular_component|biological_process
4930500G05Rik	22.846	20.3694	25.3226	1.23871	0.308834	0.637937	0.947379	Up	0.589748	0.872496	0.271112	0.358918	0.240199	0.840384	75037	RIKEN cDNA 4930500G05 gene	non_coding			GO:0003674,GO:0005575,GO:0008150	molecular_function|cellular_component|biological_process
4930500H12Rik	1.46739	2.20841	0.726359	0.330359	-1.59789	0.466745	0.907844	Down	0.00869091	0.00881668	0	0.021157	0.0308921	0	74991	RIKEN cDNA 4930500H12 gene	non_coding			GO:0003674,GO:0005575,GO:0008150	molecular_function|cellular_component|biological_process
4930503L19Rik	216.361	220.084	212.637	0.965364	-0.0508557	0.851875	0.98672	Down	1.44748	1.86441	1.50076	1.95323	1.06949	2.02325	269033	RIKEN cDNA 4930503L19 gene	protein_coding			GO:0005576,GO:0008285	extracellular region|negative regulation of cell population proliferation
4930506C21Rik	3.28296	4.05234	2.51358	0.617667	-0.695099	0.658698	0.953308	Down	0	0.0634077	0.156727	0.0507189	0.0277712	0.293919	75060	RIKEN cDNA 4930506C21 gene	non_coding			GO:0003674,GO:0005575,GO:0008150	molecular_function|cellular_component|biological_process
4930507D05Rik	5.70771	4.8831	6.53232	1.33979	0.422006	0.658068	0.953308	Up	0.111104	0.098623	0.041789	0.0563479	0.0740482	0.0593708	74706	RIKEN cDNA 4930507D05 gene	non_coding			GO:0003674,GO:0005575,GO:0008150	molecular_function|cellular_component|biological_process
4930509G22Rik	11.0074	7.48552	14.5292	1.93453	0.951985	0.260665	0.798906	Up	0.208785	0.0747552	0.209411	0.149489	0.0327412	0.0735039	105246071	RIKEN cDNA 4930509G22 gene	non_coding			GO:0003674,GO:0005575,GO:0008150	molecular_function|cellular_component|biological_process
4930511M06Rik	3.22349	2.48486	3.96211	1.60526	0.682808	0.635565	0.947126	Up	0.0177566	0.0540407	0.0267148	0.0360219	0.0236687	0	75084	RIKEN cDNA 4930511M06 gene	non_coding			GO:0003674,GO:0005575,GO:0008150	molecular_function|cellular_component|biological_process
4930512B01Rik	2.50449	2.85089	2.15809	0.760931	-0.394162	0.858251	0.98672	Down	0	0	0.129043	0	0.133384	0.036667	74724	RIKEN cDNA 4930512B01 gene	non_coding			GO:0003674,GO:0005575,GO:0008150	molecular_function|cellular_component|biological_process
4930512H18Rik	14.1889	13.551	14.8267	1.09781	0.134625	0.852719	0.98672	Up	0.0905059	0.107118	0.113472	0.0306008	0.154151	0.103176	75111	RIKEN cDNA 4930512H18 gene	non_coding			GO:0003674,GO:0005575,GO:0008150	molecular_function|cellular_component|biological_process
4930512J16Rik	1.46765	2.21594	0.719362	0.327402	-1.61087	0.467873	0.908278	Down	0	0	0.0328797	0.0133004	0.0728267	0.0140139	75131	RIKEN cDNA 4930512J16 gene	non_coding			GO:0003674,GO:0005575,GO:0008150	molecular_function|cellular_component|biological_process
4930513D17Rik	1.42231	0.326136	2.51849	7.733	2.95103	0.177745	0.722138	Up	0.0253497	0.102866	0.0508514	0	0.0225266	0	75095	RIKEN cDNA 4930513D17 gene	non_coding			GO:0003674,GO:0005575,GO:0008150	molecular_function|cellular_component|biological_process
4930513N10Rik	24.5786	22.5936	26.5637	1.17336	0.23064	0.67647	0.956026	Up	0.402213	0.154391	0.239871	0.273453	0.17388	0.241652	319960	RIKEN cDNA 4930513N10 gene	non_coding			GO:0003674,GO:0005575,GO:0008150	molecular_function|cellular_component|biological_process
4930520E11Rik	23.0759	20.4527	25.699	1.26228	0.336033	0.54878	0.929493	Up	0.160652	0.183349	0.134278	0.0869085	0.202244	0.0915708	102634716	RIKEN cDNA 4930520E11 gene	non_coding			GO:0003674,GO:0005575,GO:0008150	molecular_function|cellular_component|biological_process
4930520O04Rik	2.04697	0.851899	3.24203	3.72657	1.89785	0.333958	0.845218	Up	0.0242791	0.049261	0.146112	0	0	0.0622755	75116	RIKEN cDNA 4930520O04 gene	non_coding			GO:0003674,GO:0005575,GO:0008150	molecular_function|cellular_component|biological_process
4930521O11Rik	5.69008	6.99965	4.38051	0.624954	-0.678177	0.563025	0.933114	Down	0.144752	0.0734234	0	0.146826	0.112553	0.0928215	74715	RIKEN cDNA 4930521O11 gene	non_coding			GO:0003674,GO:0005575,GO:0008150	molecular_function|cellular_component|biological_process
4930522L14Rik	344.919	331.465	358.373	1.08138	0.112874	0.640213	0.947379	Up	1.83698	3.15439	3.43143	2.44109	2.54595	2.86744	100041734	RIKEN cDNA 4930522L14 gene	protein_coding			GO:0000978,GO:0000981,GO:0005634,GO:0006357	RNA polymerase II cis-regulatory region sequence-specific DNA binding|DNA-binding transcription factor activity, RNA polymerase II-specific|nucleus|regulation of transcription by RNA polymerase II					zf-C2H2
4930522P08Rik	4.2823	4.97126	3.59334	0.720217	-0.473496	0.719236	0.96315	Down	0.0904164	0.550349	0.272063	0.0733693	0.241041	1.00497	78183	RIKEN cDNA 4930522P08 gene	non_coding			GO:0003674,GO:0005575,GO:0008150	molecular_function|cellular_component|biological_process
4930523C07Rik	708.843	842.296	575.391	0.682937	-0.550176	0.00987533	0.179511	Down	3.31511	4.4356	4.34756	5.32501	4.61684	8.09643	67647	RIKEN cDNA 4930523C07 gene	protein_coding			GO:0003674,GO:0005575,GO:0008150	molecular_function|cellular_component|biological_process
4930524J08Rik	8.16685	9.82654	6.50715	0.660447	-0.598485	0.510607	0.91942	Down	0.23511	0.286215	0.330142	0.724975	0.125356	0.442239	75129	RIKEN cDNA 4930524J08 gene	protein_coding			GO:0003674,GO:0005575,GO:0008150	molecular_function|cellular_component|biological_process
4930525G20Rik	16.1945	12.8424	19.5466	1.51611	0.600378	0.308873	0.82968	Up	0.183618	0.196623	0.173937	0.140721	0.0725195	0.156992	320163	RIKEN cDNA 4930525G20 gene	non_coding			GO:0003674,GO:0005575,GO:0008150	molecular_function|cellular_component|biological_process
4930526I15Rik	196.902	208.092	185.711	0.892426	-0.164195	0.475709	0.910452	Down	2.378	3.29456	3.5065	2.90888	3.34322	4.17255	75135	RIKEN cDNA 4930526I15 gene	non_coding			GO:0003674,GO:0005575,GO:0008150	molecular_function|cellular_component|biological_process
4930528A17Rik	5.45958	4.01387	6.90528	1.72913	0.790048	0.421812	0.889446	Up	0.129233	0.0728352	0.0720116	0.0466078	0.0765607	0.0368311	67735	RIKEN cDNA 4930528A17 gene	non_coding			GO:0003674,GO:0005575,GO:0008150	molecular_function|cellular_component|biological_process
4930539J05Rik	5.10316	5.49548	4.71084	0.858357	-0.22035	0.831097	0.983606	Down	0.304703	0.309113	0.18337	0.494509	0.27077	0.156311	319587	RIKEN cDNA 4930539J05 gene	non_coding			GO:0003674,GO:0005575,GO:0008150	molecular_function|cellular_component|biological_process
4930539M17Rik	2.8876	3.97398	1.80122	0.454605	-1.13731	0.43977	0.898394	Down	0.035932	0.109356	0.0360397	0.262416	0.0957911	0.0307216	75149	RIKEN cDNA 4930539M17 gene	non_coding			GO:0003674,GO:0005575,GO:0008150	molecular_function|cellular_component|biological_process
4930544F09Rik	1.73148	0.953562	2.5094	2.67323	1.41858	0.487446	0.913589	Up	0	0.00764279	0.00566727	0.00152834	0.00334738	0	75198	RIKEN cDNA 4930544F09 gene	non_coding			GO:0003674,GO:0005575,GO:0008150	molecular_function|cellular_component|biological_process
4930546K05Rik	4.57685	5.54289	3.6108	0.654128	-0.612355	0.586617	0.93688	Down	0.0172197	0.0174689	0.0518141	0.0209597	0.0688592	0.0441682	78194	RIKEN cDNA 4930546K05 gene	non_coding			GO:0003674,GO:0005575,GO:0008150	molecular_function|cellular_component|biological_process
4930550C14Rik	18.1211	15.5691	20.6732	1.32342	0.404267	0.480265	0.912065	Up	0.13238	0.105101	0.0923663	0.10275	0.0511465	0.0984205	75311	RIKEN cDNA 4930550C14 gene	protein_coding			GO:0005515,GO:0005737,GO:0005739,GO:0005741,GO:0005829,GO:0016020,GO:0090258,GO:1903215	protein binding|cytoplasm|mitochondrion|mitochondrial outer membrane|cytosol|membrane|negative regulation of mitochondrial fission|negative regulation of protein targeting to mitochondrion
4930552P12Rik	4.68248	2.47506	6.88991	2.80524	1.48813	0.179781	0.725036	Up	0.0976613	0.0990746	0.0367328	0.0198121	0.0433925	0.0208749	77594	RIKEN cDNA 4930552P12 gene	non_coding			GO:0003674,GO:0005575,GO:0008150	molecular_function|cellular_component|biological_process
4930553J12Rik	5.72142	0	11.4428	68.3704	6.0953	0.119509	0.636598	Up	0	1.03794	0	0	0	0	75351	RIKEN cDNA 4930553J12 gene	non_coding			GO:0003674,GO:0005575,GO:0008150	molecular_function|cellular_component|biological_process
4930553P18Rik	1.98255	3.22757	0.73754	0.226349	-2.14338	0.342163	0.847974	Down	0.036188	0	0	0.0880955	0	0.0773512	75355	RIKEN cDNA 4930553P18 gene	non_coding			GO:0003674,GO:0005575,GO:0008150	molecular_function|cellular_component|biological_process
4930555A03Rik	2.05471	1.23753	2.87189	2.33819	1.22539	0.504685	0.918138	Up	0.0144683	0.102744	0	0.0117405	0.0257141	0.0123703	100504653	RIKEN cDNA 4930555A03 gene	non_coding			GO:0003674,GO:0005575,GO:0008150	molecular_function|cellular_component|biological_process
4930556A17Rik	13.6214	10.2867	16.9561	1.64861	0.721251	0.398618	0.879396	Up	0.18199	0.158249	0.886602	0.358646	0.184826	0.200057	102640520	RIKEN cDNA 4930556A17 gene	non_coding			GO:0003674,GO:0005575,GO:0008150	molecular_function|cellular_component|biological_process
4930556M19Rik	201.974	198.438	205.509	1.03674	0.052055	0.8315	0.983606	Up	1.27485	1.50648	1.22247	1.37553	1.469	1.02411	75259	RIKEN cDNA 4930556M19 gene	non_coding			GO:0003674,GO:0005575,GO:0008150	molecular_function|cellular_component|biological_process
4930556N13Rik	1.19536	2.39072	0	0.0834341	-3.58322	0.142051	0.677515	Down	0	0	0	0.0478249	0.0523732	0.100781	75285	RIKEN cDNA 4930556N13 gene	non_coding			GO:0003674,GO:0005575,GO:0008150	molecular_function|cellular_component|biological_process
4930562F17Rik	15.8123	17.4949	14.1297	0.8097	-0.304541	0.611336	0.943188	Down	0.253768	0.220663	0.236349	0.323593	0.354368	0.201472	75256	RIKEN cDNA 4930562F17 gene	non_coding			GO:0003674,GO:0005575,GO:0008150	molecular_function|cellular_component|biological_process
4930563E22Rik	16.237	16.9594	15.5146	0.918707	-0.122323	0.846188	0.98622	Down	0.0827748	0.149285	0.166046	0.1418	0.196151	0.0943624	75304	RIKEN cDNA 4930563E22 gene	protein_coding			GO:0003674,GO:0005575,GO:0008150	molecular_function|cellular_component|biological_process
4930567H12Rik	1.60665	2.48486	0.728451	0.293392	-1.7691	0.410922	0.885428	Down	0.0319061	0	0.0320018	0.129453	0.0850585	0	75930	RIKEN cDNA 4930567H12 gene	non_coding			GO:0003674,GO:0005575,GO:0008150	molecular_function|cellular_component|biological_process
4930568A12Rik	1.05828	2.11655	0	0.0943471	-3.40588	0.200423	0.748011	Down	0	0	0	0.0802775	0.0175824	0.0169168	75883	RIKEN cDNA 4930568A12 gene	non_coding			GO:0003674,GO:0005575,GO:0008150	molecular_function|cellular_component|biological_process
4930577N17Rik	41.8622	39.3323	44.3921	1.12909	0.175156	0.667587	0.955048	Up	0.555015	1.08856	0.649459	0.705584	0.624726	0.7118	67746	RIKEN cDNA 4930577N17 gene	non_coding			GO:0003674,GO:0005575,GO:0008150	molecular_function|cellular_component|biological_process
4930578L24Rik	8.452	9.67958	7.22442	0.746726	-0.421349	0.610238	0.943156	Down	0.0464487	0.0659692	0.0745407	0.0376913	0.099062	0.11914	105246496	RIKEN cDNA 4930578L24 gene	non_coding			GO:0003674,GO:0005575,GO:0008150	molecular_function|cellular_component|biological_process
4930579G18Rik	6.92245	7.70999	6.13491	0.794164	-0.332491	0.789828	0.975132	Down	0.104279	0.253891	0	0.236931	0.0370663	0.178316	75913	RIKEN cDNA 4930579G18 gene	non_coding			GO:0003674,GO:0005575,GO:0008150	molecular_function|cellular_component|biological_process
4930579G24Rik	76.7226	82.167	71.2783	0.867218	-0.205533	0.505165	0.918138	Down	0.912563	0.863005	1.28763	1.00408	1.15455	1.42823	75939	RIKEN cDNA 4930579G24 gene	protein_coding			GO:0003674,GO:0005575,GO:0005737,GO:0005829,GO:0008150	molecular_function|cellular_component|cytoplasm|cytosol|biological_process
4930579K19Rik	13.9803	15.6684	12.2921	0.783923	-0.351216	0.57482	0.93474	Down	0.238049	0.241494	0.424468	0.386335	0.32906	0.45229	75881	RIKEN cDNA 4930579K19 gene	non_coding			GO:0003674,GO:0005575,GO:0008150	molecular_function|cellular_component|biological_process
4930581F22Rik	68.9309	76.383	61.4789	0.805206	-0.312571	0.284243	0.813106	Down	0.63427	0.7464	0.788853	0.936726	0.867995	0.911057	78934	RIKEN cDNA 4930581F22 gene	non_coding			GO:0003674,GO:0005575,GO:0008150	molecular_function|cellular_component|biological_process
4930590J08Rik	12.6866	15.9411	9.43213	0.592456	-0.755221	0.295946	0.821728	Down	0.0386287	0.0195939	0.042619	0.0752296	0.0617882	0.0330273	381798	RIKEN cDNA 4930590J08 gene	protein_coding			GO:0003674,GO:0005737,GO:0008150,GO:0016020	molecular_function|cytoplasm|biological_process|membrane
4930592C13Rik	2.8554	3.91449	1.79631	0.459505	-1.12185	0.470558	0.90887	Down	0	0.0467644	0.184942	0.299249	0.0819272	0.118239	381498	RIKEN cDNA 4930592C13 gene	non_coding			GO:0003674,GO:0005575,GO:0008150	molecular_function|cellular_component|biological_process
4930594M22Rik	11.7822	14.4934	9.07108	0.625312	-0.677352	0.399606	0.880488	Down	0.0922835	0.0851081	0.0336583	0.040846	0.134192	0.172149	105245866	RIKEN cDNA 4930594M22 gene	non_coding			GO:0003674,GO:0005575,GO:0008150	molecular_function|cellular_component|biological_process
4930597A21Rik	4.25902	3.47689	5.04116	1.43802	0.524083	0.692259	0.959186	Up	0.0873075	0.265713	0.262708	0.141693	0	0.298589	75389	RIKEN cDNA 4930597A21 gene	non_coding			GO:0003674,GO:0005575,GO:0008150	molecular_function|cellular_component|biological_process
4930597O21Rik	3.51919	3.77818	3.26021	0.856386	-0.223667	0.873173	0.987502	Down	0.0687818	0.0465181	0.0919841	0.0930228	0	0.156821	75373	RIKEN cDNA 4930597O21 gene	non_coding			GO:0003674,GO:0005575,GO:0008150	molecular_function|cellular_component|biological_process
4930599N23Rik	11.7121	13.9375	9.48667	0.679296	-0.557887	0.461374	0.907844	Down	0.554006	0.175632	0.173646	0.39336	0.461539	0.503275	75379	RIKEN cDNA 4930599N23 gene	non_coding			GO:0003674,GO:0005575,GO:0008150	molecular_function|cellular_component|biological_process
4931406C07Rik	1749.36	1567.21	1931.51	1.23228	0.301329	0.0219659	0.277434	Up	16.4469	18.9102	16.0927	13.9445	12.4702	15.831	70984	RIKEN cDNA 4931406C07 gene	protein_coding			GO:0005634,GO:0005654,GO:0008270,GO:0016604,GO:0016787,GO:0016788,GO:0046872	nucleus|nucleoplasm|zinc ion binding|nuclear body|hydrolase activity|hydrolase activity, acting on ester bonds|metal ion binding
4931408C20Rik	8.32087	13.7251	2.91662	0.212033	-2.23764	0.0321928	0.338715	Down	0.035177	0.0214116	0	0.131306	0.0812746	0.0541369	210940	RIKEN cDNA 4931408C20 gene	protein_coding			GO:0003674,GO:0005575,GO:0008150	molecular_function|cellular_component|biological_process
4931408D14Rik	17.6094	18.9192	16.2996	0.86319	-0.21225	0.817557	0.980106	Down	0.122144	0.0190634	0.282717	0.0533698	0.292227	0.152632	77059	RIKEN cDNA 4931408D14 gene	non_coding			GO:0003674,GO:0005575,GO:0008150	molecular_function|cellular_component|biological_process
4931414P19Rik	356.076	290.295	421.858	1.45349	0.539523	0.00321608	0.0889197	Up	2.17537	1.78187	1.94902	1.42938	1.35901	1.31187	74359	RIKEN cDNA 4931414P19 gene	protein_coding			GO:0005575,GO:0005576,GO:0010628,GO:0030154	cellular_component|extracellular region|positive regulation of gene expression|cell differentiation
4931415C17Rik	16.9698	18.0478	15.8918	0.882175	-0.180863	0.794479	0.976159	Down	0.175973	0.343306	0.0814617	0.28559	0.240577	0.150455	70966	RIKEN cDNA 4931415C17 gene	non_coding			GO:0003674,GO:0005575,GO:0008150	molecular_function|cellular_component|biological_process
4931440J10Rik	1.37465	2.02993	0.719362	0.353421	-1.50054	0.559912	0.932974	Down	0	0	0.0686009	0	0.0303894	0.175434	71000	RIKEN cDNA 4931440J10 gene	non_coding			GO:0003674,GO:0005575,GO:0008150	molecular_function|cellular_component|biological_process
4931440P22Rik	6.82556	6.80384	6.84728	1.0025	0.00359995	0.996977	0.999638	Up	0.0654924	0.18271	0.0656888	0.0797167	0.0581987	0.181985	71004	RIKEN cDNA 4931440P22 gene	non_coding			GO:0003674,GO:0005575,GO:0008150	molecular_function|cellular_component|biological_process
4932431P20Rik	1.94633	2.80872	1.08395	0.38767	-1.3671	0.495281	0.91454	Down	0.00324187	0.00657757	0	0	0.017285	0.00831532	114675	RIKEN cDNA 4932431P20 gene	protein_coding
4932438H23Rik	21.1376	17.989	24.2861	1.35168	0.434752	0.470454	0.90887	Up	0.114036	0.0879213	0.105227	0.0296113	0.105389	0.0974996	74387	RIKEN cDNA 4932438H23 gene	protein_coding			GO:0003674,GO:0005575,GO:0008150	molecular_function|cellular_component|biological_process
4933404O12Rik	113.04	147.78	78.2997	0.530459	-0.914686	0.0124751	0.205605	Down	0.621687	0.474959	0.569664	0.934211	1.52777	0.682468	66752	RIKEN cDNA 4933404O12 gene	non_coding			GO:0003674,GO:0005575,GO:0008150	molecular_function|cellular_component|biological_process
4933405D12Rik	10.7506	11.766	9.73519	0.827531	-0.273114	0.736806	0.966568	Down	0.1587	0.241494	0.676496	0.579503	0.317308	0.407061	74057	RIKEN cDNA 4933405D12 gene	non_coding			GO:0003674,GO:0005575,GO:0008150	molecular_function|cellular_component|biological_process
4933406C10Rik	14.2203	11.4278	17.0128	1.48582	0.571257	0.3508	0.853077	Up	0.298546	0.340724	0.243296	0.151411	0.182392	0.271208	74076	RIKEN cDNA 4933406C10 gene	non_coding			GO:0003674,GO:0005575,GO:0008150	molecular_function|cellular_component|biological_process
4933406J09Rik	1.8716	0.869222	2.87398	3.25644	1.7033	0.358376	0.856377	Up	0.0202461	0.123234	0.0203068	0.0164289	0	0.0346205	102639979	RIKEN cDNA 4933406J09 gene	non_coding			GO:0003674,GO:0005575,GO:0008150	molecular_function|cellular_component|biological_process
4933407K13Rik	22.5848	22.0331	23.1364	1.04956	0.0697877	0.891374	0.989286	Up	0.153435	0.164811	0.262527	0.212393	0.152388	0.19292	74396	RIKEN cDNA 4933407K13 gene	non_coding			GO:0003674,GO:0005575,GO:0008150	molecular_function|cellular_component|biological_process
4933407O12Rik	3.28338	3.68022	2.88654	0.786352	-0.346752	0.819572	0.980456	Down	0.0265652	0	0.186514	0.12934	0.094427	0.0454262	102635879	RIKEN cDNA 4933407O12 gene	protein_coding			GO:0003674,GO:0005575,GO:0008150	molecular_function|cellular_component|biological_process
4933411K16Rik	8.84345	8.99721	8.68969	0.963864	-0.0530989	0.950918	0.994876	Down	0.152243	0.0661912	0.305399	0.22943	0.115961	0.204547	66765	RIKEN cDNA 4933411K16 gene	protein_coding			GO:0003674,GO:0005575,GO:0008150	molecular_function|cellular_component|biological_process
4933412E12Rik	83.7637	82.8289	84.6984	1.02343	0.0334116	0.917306	0.991257	Up	1.27254	1.03994	1.84363	1.27643	1.50777	1.31468	71086	RIKEN cDNA 4933412E12 gene	non_coding			GO:0003674,GO:0005575,GO:0008150	molecular_function|cellular_component|biological_process
4933412O06Rik	9.97676	8.79006	11.1634	1.27138	0.346393	0.675086	0.956026	Up	0.108532	0.302782	0.435429	0.33026	0.168779	0.162389	71071	RIKEN cDNA 4933412O06 gene	non_coding			GO:0003674,GO:0005575,GO:0008150	molecular_function|cellular_component|biological_process
4933413J09Rik	34.4792	29.1842	39.7742	1.3645	0.448372	0.268892	0.804691	Up	0.28788	0.355931	0.351906	0.277404	0.239831	0.215369	71106	RIKEN cDNA 4933413J09 gene	non_coding			GO:0003674,GO:0005575,GO:0008150	molecular_function|cellular_component|biological_process
4933416I08Rik	2.31494	1.73844	2.89144	1.6431	0.716417	0.650112	0.950139	Up	0.041428	0.0420276	0.0831046	0.0336172	0	0.0708413	71159	RIKEN cDNA 4933416I08 gene	protein_coding			GO:0003674,GO:0005575,GO:0008150	molecular_function|cellular_component|biological_process
4933416M07Rik	1.93388	1.30454	2.56321	1.98801	0.991324	0.667871	0.955048	Up	0.100231	0	0.0402128	0	0.0712551	0	71082	RIKEN cDNA 4933416M07 gene	non_coding			GO:0003674,GO:0005575,GO:0008150	molecular_function|cellular_component|biological_process
4933417D19Rik	2.84235	4.96744	0.717269	0.145717	-2.77875	0.0874368	0.557343	Down	0	0.0251516	0.0248671	0.100592	0.176254	0.0635929	71186	RIKEN cDNA 4933417D19 gene	non_coding			GO:0003674,GO:0005575,GO:0008150	molecular_function|cellular_component|biological_process
4933417E11Rik	18.7892	29.2813	8.29718	0.284103	-1.81551	0.00200583	0.0662158	Down	0.139388	0.282811	0.22369	0.656028	0.89183	0.738892	71134	RIKEN cDNA 4933417E11 gene	non_coding			GO:0003674,GO:0005575,GO:0008150	molecular_function|cellular_component|biological_process
4933417O13Rik	43.2504	37.3695	49.1314	1.31263	0.392457	0.415285	0.886957	Up	0.618991	0.648205	1.462	0.648112	0.496825	0.973105	71153	RIKEN cDNA 4933417O13 gene	non_coding			GO:0003674,GO:0005575,GO:0008150	molecular_function|cellular_component|biological_process
4933421O10Rik	110.626	116.384	104.869	0.900958	-0.150468	0.529207	0.926401	Down	0.672721	0.810919	0.825563	0.802775	0.815825	0.974409	100504166	RIKEN cDNA 4933421O10 gene	non_coding			GO:0003674,GO:0005575,GO:0008150	molecular_function|cellular_component|biological_process
4933422A05Rik	2.69891	2.16624	3.23157	1.50263	0.587492	0.692861	0.959439	Up	0.0224707	0.159571	0.0225381	0.0547023	0.0599048	0.0192123	71133	RIKEN cDNA 4933422A05 gene	non_coding			GO:0003674,GO:0005575,GO:0008150	molecular_function|cellular_component|biological_process
4933424G05Rik	19.304	15.0358	23.5723	1.56465	0.645843	0.293622	0.820375	Up	0.419076	0.21257	0.507902	0.340064	0.155169	0.238871	74456	RIKEN cDNA 4933424G05 gene	non_coding			GO:0003674,GO:0005575,GO:0008150	molecular_function|cellular_component|biological_process
4933425B07Rik	3.62711	3.26974	3.98448	1.21201	0.277402	0.817146	0.979851	Up	0.0632821	0.0641979	0.0476039	0.0770264	0.0140586	0.0541057	74458	RIKEN cDNA 4933425B07 gene	non_coding			GO:0003674,GO:0005575,GO:0008150	molecular_function|cellular_component|biological_process
4933426B08Rik	16.7373	13.9511	19.5235	1.39315	0.478349	0.435253	0.895688	Up	0.0568052	0.0653109	0.0835642	0.0399492	0.0302874	0.0809467	115488815	RIKEN cDNA 4933426B08 gene	non_coding			GO:0003674,GO:0005575,GO:0008150	molecular_function|cellular_component|biological_process
4933427D14Rik	317.38	370.502	264.258	0.7131	-0.487824	0.00232072	0.0727195	Down	1.43334	1.50176	1.37872	1.92579	1.93668	2.26014	74477	RIKEN cDNA 4933427D14 gene	protein_coding			GO:0003674,GO:0005737,GO:0005813,GO:0005829,GO:0005856,GO:0007099,GO:0034451,GO:0060271,GO:0061824,GO:0071539	molecular_function|cytoplasm|centrosome|cytosol|cytoskeleton|centriole replication|centriolar satellite|cilium assembly|cytosolic ciliogenesis|protein localization to centrosome
4933427E11Rik	2.1198	2.04726	2.19235	1.05921	0.0829834	0.958655	0.995359	Up	0.100396	0.0254623	0.0251744	0.0203669	0.0223039	0.107298	66769	RIKEN cDNA 4933427E11 gene	non_coding			GO:0003674,GO:0005575,GO:0008150	molecular_function|cellular_component|biological_process
4933430I17Rik	20.0744	25.3751	14.7736	0.582724	-0.779115	0.176672	0.72186	Down	0.0260541	0.0726858	0.0359319	0.0713539	0.0723518	0.0891044	214106	RIKEN cDNA 4933430I17 gene	protein_coding			GO:0003674,GO:0005575,GO:0008150	molecular_function|cellular_component|biological_process
4933431E20Rik	84.4935	70.9117	98.0753	1.38206	0.466823	0.0963323	0.584586	Up	0.48464	0.491653	0.559573	0.301809	0.360559	0.467363	329735	RIKEN cDNA 4933431E20 gene	non_coding			GO:0003674,GO:0005575,GO:0008150	molecular_function|cellular_component|biological_process
4933433G15Rik	4.88609	5.82544	3.94675	0.675332	-0.566332	0.672986	0.956026	Down	0.026427	0.241285	0.0265063	0.128667	0.0234839	0.293733	71274	RIKEN cDNA 4933433G15 gene	non_coding			GO:0003674,GO:0005575,GO:0008150	molecular_function|cellular_component|biological_process
4933434E20Rik	2084.06	2186.2	1981.92	0.906581	-0.141492	0.354359	0.853783	Down	27.3439	27.555	36.2194	33.0747	32.9128	35.542	99650	RIKEN cDNA 4933434E20 gene	protein_coding			GO:0001701,GO:0003674,GO:0005739,GO:0005794,GO:0005829,GO:0006909	in utero embryonic development|molecular_function|mitochondrion|Golgi apparatus|cytosol|phagocytosis
4933439C10Rik	125.227	144.336	106.118	0.734845	-0.444487	0.134652	0.667043	Down	0.813957	1.46	1.21868	1.53158	1.23696	2.04744	74476	RIKEN cDNA 4933439C10 gene	non_coding			GO:0003674,GO:0005575,GO:0008150	molecular_function|cellular_component|biological_process
4933439K11Rik	3.2726	2.17377	4.37143	2.02385	1.0171	0.45351	0.905099	Up	0.226665	0.131398	0.0324779	0.0262757	0.115099	0.0553707	71319	RIKEN cDNA 4933439K11 gene	non_coding			GO:0003674,GO:0005575,GO:0008150	molecular_function|cellular_component|biological_process
4933440N22Rik	26.3972	22.7192	30.0753	1.32759	0.408807	0.410372	0.885397	Up	0.413302	0.289161	0.486014	0.26599	0.392603	0.243703	74471	RIKEN cDNA 4933440N22 gene	protein_coding			GO:0003674,GO:0005575,GO:0008150	molecular_function|cellular_component|biological_process
5031425E22Rik	181.223	168.376	194.069	1.15193	0.204057	0.366982	0.862919	Up	0.992868	1.38155	1.25154	1.09419	0.870373	1.21598	269630	RIKEN cDNA 5031425E22 gene	non_coding			GO:0003674,GO:0005575,GO:0008150	molecular_function|cellular_component|biological_process
5031434O11Rik	18.4892	23.2504	13.7281	0.590417	-0.760195	0.240879	0.780107	Down	0.145034	0.254139	0.105796	0.43866	0.187465	0.22546	100039684	RIKEN cDNA 5031434O11 gene	non_coding			GO:0003674,GO:0005575,GO:0008150	molecular_function|cellular_component|biological_process
5031439G07Rik	3367.08	3563.78	3170.39	0.889667	-0.168662	0.273598	0.805792	Down	13.533	12.3457	11.1509	14.0069	14.9763	12.945	223739	RIKEN cDNA 5031439G07 gene	protein_coding			GO:0003674,GO:0005575,GO:0008150	molecular_function|cellular_component|biological_process
5033403F01Rik	23.7624	26.1322	21.3926	0.816977	-0.291633	0.57961	0.935737	Down	0.511545	0.406134	0.401541	0.739959	0.335991	0.551464	75958	RIKEN cDNA 5033403F01 gene	non_coding			GO:0003674,GO:0005575,GO:0008150	molecular_function|cellular_component|biological_process
5033406O09Rik	94.8073	101.335	88.2798	0.871461	-0.198491	0.527471	0.925734	Down	1.25124	1.09057	1.97971	1.45864	1.75397	1.80811	77675	RIKEN cDNA 5033406O09 gene	non_coding
5033417F24Rik	17.7284	21.0351	14.4216	0.685387	-0.545009	0.36257	0.860603	Down	0.109718	0.222612	0.2987	0.292534	0.250713	0.388634	75995	RIKEN cDNA 5033417F24 gene	non_coding			GO:0003674,GO:0005575,GO:0008150	molecular_function|cellular_component|biological_process
5033421B08Rik	139.546	135.084	144.009	1.06667	0.0931155	0.792002	0.976053	Up	0.934875	0.688223	1.6845	0.886169	1.22041	1.02567	75990	RIKEN cDNA 5033421B08 gene	non_coding			GO:0003674,GO:0005575,GO:0008150	molecular_function|cellular_component|biological_process
5033430I15Rik	25.655	23.1751	28.135	1.21081	0.275968	0.630748	0.946787	Up	0.602975	1.10106	1.45148	0.97858	0.428659	1.23729	76000	RIKEN cDNA 5033430I15 gene	non_coding			GO:0003674,GO:0005575,GO:0008150	molecular_function|cellular_component|biological_process
5330438D12Rik	17.6261	19.7976	15.4545	0.780682	-0.357193	0.605167	0.941202	Down	0.0890294	0.519327	0.357186	0.397341	0.316458	0.532836	327824	RIKEN cDNA 5330438D12 gene	protein_coding
5330439K02Rik	2.40887	2.64984	2.16789	0.81399	-0.296917	0.853172	0.98672	Down	0.15428	0.313026	0	0.187788	0.0685492	0.329771	108168267	RIKEN cDNA 5330439K02 gene	non_coding			GO:0003674,GO:0005575,GO:0008150	molecular_function|cellular_component|biological_process
5430400D12Rik	2.92792	2.62499	3.23085	1.22474	0.292481	0.865248	0.98672	Up	0	0.016742	0.0331053	0.0178555	0	0.0235168	71339	RIKEN cDNA 5430400D12 gene	non_coding			GO:0003674,GO:0005575,GO:0008150	molecular_function|cellular_component|biological_process
5430401H09Rik	6.25013	7.45002	5.05025	0.681994	-0.552169	0.564574	0.933189	Down	0.0197006	0.0399715	0.0329329	0.0266438	0.0758621	0.0336878	100504461	RIKEN cDNA 5430401H09 gene	non_coding			GO:0003674,GO:0005575,GO:0008150	molecular_function|cellular_component|biological_process
5430402O13Rik	13.9903	13.8901	14.0905	1.01418	0.0203088	0.976217	0.997376	Up	0.272327	0.276268	0.637334	0.515625	0.295776	0.362191	73183	RIKEN cDNA 5430402O13 gene	non_coding			GO:0003674,GO:0005575,GO:0008150	molecular_function|cellular_component|biological_process
5430403G16Rik	197.294	203.019	191.569	0.944534	-0.0823261	0.760609	0.968966	Down	1.36028	1.57711	2.24145	1.63207	2.22763	1.65317	77200	RIKEN cDNA 5430403G16 gene	protein_coding			GO:0000978,GO:0000981,GO:0001227,GO:0005634,GO:0005654,GO:0006357	RNA polymerase II cis-regulatory region sequence-specific DNA binding|DNA-binding transcription factor activity, RNA polymerase II-specific|DNA-binding transcription repressor activity, RNA polymerase II-specific|nucleus|nucleoplasm|regulation of transcription by RNA polymerase II					zf-C2H2
5430403N17Rik	21.8881	27.4772	16.299	0.594853	-0.749395	0.187728	0.73337	Down	0.179027	0.133186	0.227447	0.242122	0.445449	0.224497	330737	RIKEN cDNA 5430403N17 gene	non_coding
5430405H02Rik	70.3904	72.1131	68.6676	0.951249	-0.0721058	0.821965	0.981214	Down	1.05	1.41344	1.39745	1.1142	1.18428	1.83002	74487	RIKEN cDNA 5430405H02 gene	non_coding			GO:0003674,GO:0005575,GO:0008150	molecular_function|cellular_component|biological_process
5430416N02Rik	52.3682	54.2144	50.5221	0.93162	-0.102186	0.796165	0.976839	Down	1.65494	3.35777	1.85518	2.64634	1.98968	2.7883	100503199	RIKEN cDNA 5430416N02 gene	non_coding			GO:0003674,GO:0005575,GO:0009611	molecular_function|cellular_component|response to wounding
5430421F17Rik	20.0159	19.0934	20.9385	1.09376	0.129297	0.816035	0.97967	Up	0.185876	0.323255	0.266333	0.204699	0.165175	0.351899	74489	RIKEN cDNA 5430421F17 gene	non_coding			GO:0003674,GO:0005575,GO:0008150	molecular_function|cellular_component|biological_process
5430437J10Rik	2.08623	0.567932	3.60453	6.15492	2.62174	0.166492	0.709567	Up	0.0522647	0.132553	0.0786322	0	0	0.0446859	71432	RIKEN cDNA 5430437J10 gene	non_coding			GO:0003674,GO:0005575,GO:0008150	molecular_function|cellular_component|biological_process
5530601H04Rik	117.721	124.348	111.094	0.893182	-0.162973	0.610113	0.943156	Down	0.767473	0.7206	1.03183	0.602898	0.993982	1.28445	71445	RIKEN cDNA 5530601H04 gene	non_coding			GO:0003674,GO:0005575,GO:0008150	molecular_function|cellular_component|biological_process
5730405A17Rik	10.6364	6.46636	14.8064	2.296	1.19912	0.269943	0.805748	Up	0.0481255	0.0139491	0.220662	0.0669462	0.0427659	0.0117563	102638389	RIKEN cDNA 5730405A17 gene	non_coding			GO:0003674,GO:0005575,GO:0008150	molecular_function|cellular_component|biological_process
5730405O15Rik	12.5628	13.5632	11.5623	0.849203	-0.235818	0.761097	0.96903	Down	0.309169	0.487889	0.310096	0.195128	0.274738	0.881124	70489	RIKEN cDNA 5730405O15 gene	non_coding			GO:0003674,GO:0005575,GO:0008150	molecular_function|cellular_component|biological_process
5730408K05Rik	10.1709	10.9035	9.43841	0.868691	-0.203086	0.825032	0.982013	Down	0.793498	0.160996	1.11423	0.450725	1.41026	0.542748	67531	RIKEN cDNA 5730408K05 gene	non_coding			GO:0003674,GO:0005575,GO:0008150	molecular_function|cellular_component|biological_process
5730409E04Rik	181.862	192.643	171.081	0.888244	-0.170972	0.430685	0.893206	Down	1.54267	1.88878	1.63266	1.54534	2.0043	2.2286	230757	RIKEN cDNA 5730409E04Rik gene	protein_coding			GO:0003674,GO:0005575,GO:0008150	molecular_function|cellular_component|biological_process
5730412P04Rik	1.99642	0	3.99285	23.8507	4.57596	0.0688868	0.499003	Up	0.088192	0	0.154799	0	0	0	70491	RIKEN cDNA 5730412P04 gene	non_coding			GO:0003674,GO:0005575,GO:0008150	molecular_function|cellular_component|biological_process
5730419F03Rik	11.4393	14.541	8.33772	0.571343	-0.807571	0.307733	0.82968	Down	0.11107	0.100158	0.074269	0.240345	0.0548338	0.211032	70537	RIKEN cDNA 5730419F03 gene	non_coding			GO:0003674,GO:0005575,GO:0008150	molecular_function|cellular_component|biological_process
5730420D15Rik	2.14621	2.85089	1.44154	0.509039	-0.974153	0.623203	0.945462	Down	0.0257786	0.078455	0	0	0.160354	0.044081	70523	RIKEN cDNA 5730420D15 gene	non_coding			GO:0003674,GO:0005575,GO:0008150	molecular_function|cellular_component|biological_process
5730455P16Rik	399.493	395.762	403.224	1.01905	0.0272309	0.863009	0.98672	Up	2.43421	2.64916	2.27041	2.19356	2.49546	2.60856	70591	RIKEN cDNA 5730455P16 gene	protein_coding			GO:0003674,GO:0005794,GO:0005802,GO:0005829,GO:0006886,GO:0031410,GO:0099041	molecular_function|Golgi apparatus|trans-Golgi network|cytosol|intracellular protein transport|cytoplasmic vesicle|vesicle tethering to Golgi
5730460C07Rik	13.7912	10.2498	17.3326	1.68994	0.756974	0.273595	0.805792	Up	0.166141	0.1854	0.449927	0.134817	0.147639	0.198869	70594	RIKEN cDNA 5730460C07 gene	non_coding			GO:0003674,GO:0005575,GO:0008150	molecular_function|cellular_component|biological_process
5730480H06Rik	11.8897	14.3354	9.44403	0.655458	-0.609425	0.481264	0.912803	Down	0.210746	0.14253	0.105689	0.242267	0.0468189	0.43545	70592	RIKEN cDNA 5730480H06 gene	non_coding			GO:0003674,GO:0005575,GO:0008150	molecular_function|cellular_component|biological_process
5730507C01Rik	67.4569	27.7654	107.148	3.85531	1.94685	0.246669	0.785655	Up	1.56114	0.0406086	0.746778	0.0194893	0.0284571	0.616046	236366	RIKEN cDNA 5730507C01 gene	protein_coding			GO:0000122,GO:0000978,GO:0001227,GO:0001817,GO:0002682,GO:0005654	negative regulation of transcription by RNA polymerase II|RNA polymerase II cis-regulatory region sequence-specific DNA binding|DNA-binding transcription repressor activity, RNA polymerase II-specific|regulation of cytokine production|regulation of immune system process|nucleoplasm					zf-C2H2
5730552O08Rik	8.85407	10.8169	6.89128	0.638522	-0.647192	0.514756	0.920097	Down	0.0541351	0.0235365	0.069811	0.012551	0.137446	0.085958	115488900	RIKEN cDNA 5730552O08 gene	non_coding			GO:0003674,GO:0005575,GO:0008150	molecular_function|cellular_component|biological_process
5830408C22Rik	3.9066	3.48441	4.32879	1.23184	0.300816	0.814838	0.97967	Up	0.26043	0.616464	0.174141	0.140886	0.0771423	0.667997	74744	RIKEN cDNA 5830408C22 gene	non_coding			GO:0003674,GO:0005575,GO:0008150	molecular_function|cellular_component|biological_process
5830428M24Rik	2.85648	3.17702	2.53594	0.802889	-0.316728	0.862541	0.98672	Down	0.0587663	0	0.147356	0	0.208887	0.0502447	76062	RIKEN cDNA 5830428M24 gene	non_coding			GO:0003674,GO:0005575,GO:0008150	molecular_function|cellular_component|biological_process
5830432E09Rik	6.22095	5.54289	6.899	1.2486	0.320312	0.751761	0.96829	Up	0.183556	0.165522	0.0409126	0.0496495	0.163114	0.104626	67765	RIKEN cDNA 5830432E09 gene	non_coding			GO:0003674,GO:0005575,GO:0008150	molecular_function|cellular_component|biological_process
5830433I10Rik	7.88344	7.85382	7.91305	1.00825	0.0118583	0.989894	0.998914	Up	0.00990583	0.0435464	0.0198711	0.0401909	0.0146711	0.0169388	108168347	RIKEN cDNA 5830433I10 gene	non_coding			GO:0003674,GO:0005575,GO:0008150	molecular_function|cellular_component|biological_process
5830444B04Rik	142.329	53.6797	230.978	4.30824	2.1071	0.0160557	0.235876	Up	2.36801	1.85236	1.86957	0.416721	0.895804	0.0813105	641454	RIKEN cDNA 5830444B04 gene	non_coding			GO:0003674,GO:0005575,GO:0008150	molecular_function|cellular_component|biological_process
5830448L01Rik	72.4251	59.3995	85.4507	1.43703	0.523088	0.0753664	0.520702	Up	1.43559	1.40175	1.42189	0.815445	0.940836	1.2581	115488304	RIKEN cDNA 5830448L01 gene	non_coding			GO:0003674,GO:0005575,GO:0008150	molecular_function|cellular_component|biological_process
5830454E08Rik	7.41702	7.30094	7.5331	1.0343	0.0486566	0.961804	0.995359	Up	0.0410099	0.582447	0.246797	0.366057	0.255099	0.210379	76100	RIKEN cDNA 5830454E08 gene	non_coding			GO:0003674,GO:0005575,GO:0008150	molecular_function|cellular_component|biological_process
5930403L14Rik	5.20428	4.26319	6.14537	1.44453	0.530602	0.597161	0.939048	Up	0.0268366	0.038115	0.0269171	0.00871075	0.0286175	0.0275342	320939	RIKEN cDNA 5930403L14 gene	non_coding			GO:0003674,GO:0005575,GO:0008150	molecular_function|cellular_component|biological_process
5930403N24Rik	4.68062	5.00591	4.35534	0.864059	-0.210798	0.846773	0.986458	Down	0.049241	0.0299721	0.0395109	0.0239743	0.0262543	0.0926215	100040846	RIKEN cDNA 5930403N24 gene	non_coding			GO:0003674,GO:0005575,GO:0008150	molecular_function|cellular_component|biological_process
5930430L01Rik	123.381	125.087	121.675	0.973819	-0.0382744	0.905585	0.990571	Down	0.86381	0.759986	0.958408	1.05452	1.01216	0.581691	319982	RIKEN cDNA 5930430L01 gene	non_coding			GO:0003674,GO:0005575,GO:0008150	molecular_function|cellular_component|biological_process
5930438M14Rik	2.29391	2.74398	1.84385	0.669834	-0.578124	0.765932	0.970309	Down	0.0624648	0	0	0.0608252	0.0222033	0.0106814	328324	RIKEN cDNA 5930438M14 gene	non_coding
6030407O03Rik	10.7124	6.53862	14.8861	2.29208	1.19666	0.15603	0.698929	Up	0.321453	0.274614	0.101816	0.054915	0.180413	0.0723262	109198	RIKEN cDNA 6030407O03 gene	non_coding			GO:0003674,GO:0005575,GO:0008150	molecular_function|cellular_component|biological_process
6030426L16Rik	36.6709	41.4555	31.8863	0.770001	-0.377068	0.337381	0.845447	Down	0.226492	0.193869	0.205874	0.241224	0.314483	0.266268	628850	RIKEN cDNA 6030426L16 gene	protein_coding			GO:0003674,GO:0005575,GO:0008150	molecular_function|cellular_component|biological_process
6030440G07Rik	15.4289	8.83748	22.0203	2.49728	1.32036	0.0561322	0.453955	Up	0.334532	0.395936	0.978646	0.180973	0.272504	0.238352	77878	RIKEN cDNA 6030440G07 gene	non_coding			GO:0003674,GO:0005575,GO:0008150	molecular_function|cellular_component|biological_process
6030443J06Rik	12.6944	14.8874	10.5014	0.703386	-0.507611	0.494785	0.91454	Down	0.0775147	0.100083	0.0282717	0.0743365	0.0688822	0.156649	320719	RIKEN cDNA 6030443J06 gene	non_coding			GO:0003674,GO:0005575,GO:0008150	molecular_function|cellular_component|biological_process
6030458C11Rik	785.243	803.066	767.421	0.955682	-0.0653976	0.650794	0.950528	Down	2.55903	2.27407	2.20856	2.3824	2.52965	2.53565	77877	RIKEN cDNA 6030458C11 gene	protein_coding			GO:0003674,GO:0005575,GO:0008150	molecular_function|cellular_component|biological_process
6030466F02Rik	12.5991	14.7359	10.4623	0.71244	-0.48916	0.482312	0.912803	Down	0.127491	0.237116	0.255746	0.344846	0.339878	0.181673	234863	RIKEN cDNA 6030466F02 gene	non_coding			GO:0003674,GO:0005575,GO:0008150	molecular_function|cellular_component|biological_process
6030468B19Rik	2.85684	2.85089	2.8628	1.0117	0.0167753	0.992914	0.999115	Up	0	0.176636	0.0249483	0	0.154725	0.0425337	77727	RIKEN cDNA 6030468B19 gene	protein_coding			GO:0002250,GO:0002313,GO:0002376,GO:0004888,GO:0005125,GO:0005576,GO:0005615,GO:0007166,GO:0050776,GO:2000558	adaptive immune response|mature B cell differentiation involved in immune response|immune system process|transmembrane signaling receptor activity|cytokine activity|extracellular region|extracellular space|cell surface receptor signaling pathway|regulation of immune response|positive regulation of immunoglobulin production in mucosal tissue
6230400D17Rik	13.5776	13.8344	13.3208	0.960547	-0.0580718	0.949929	0.994876	Down	0.0840174	0.198878	0.758425	0.36361	0.124435	0.622564	76133	RIKEN cDNA 6230400D17 gene	non_coding			GO:0003674,GO:0005575,GO:0008150	molecular_function|cellular_component|biological_process
6330403K07Rik	294.866	223.592	366.14	1.63935	0.713128	0.0419985	0.391636	Up	4.5	6.67359	8.28111	3.32664	5.96438	2.52694	103712	RIKEN cDNA 6330403K07 gene	protein_coding			GO:0003674,GO:0005575,GO:0008150	molecular_function|cellular_component|biological_process
6330415G19Rik	4.85487	2.10675	7.603	3.60012	1.84804	0.108587	0.611238	Up	0.109852	0.153233	0.0275455	0.0222852	0.0244046	0.0352211	320020	RIKEN cDNA 6330415G19 gene	non_coding			GO:0003674,GO:0005575,GO:0008150	molecular_function|cellular_component|biological_process
6330418K02Rik	35.2883	39.9161	30.6604	0.767603	-0.381568	0.405429	0.883987	Down	0.699049	1.3349	1.48478	1.70175	1.09623	1.8282	69004	RIKEN cDNA 6330418K02 gene	non_coding			GO:0003674,GO:0005575,GO:0008150	molecular_function|cellular_component|biological_process
6330537M06Rik	4.37187	3.35408	5.38966	1.61186	0.688727	0.56381	0.933157	Up	0.0177256	0.125875	0.124451	0.0863018	0.0472547	0.0303105	115486873	RIKEN cDNA 6330537M06 gene	non_coding
6430411K18Rik	8.26457	7.48324	9.0459	1.20495	0.268976	0.730544	0.96572	Up	0.185371	0.21156	0.185927	0.188026	0.102954	0.198113	76880	RIKEN cDNA 6430411K18 gen	non_coding			GO:0003674,GO:0005575,GO:0008150	molecular_function|cellular_component|biological_process
6430548M08Rik	732.747	775.218	690.276	0.890537	-0.167252	0.250424	0.789682	Down	3.05133	3.34254	2.76832	3.10764	3.57292	3.72345	234797	RIKEN cDNA 6430548M08 gene	protein_coding			GO:0003674,GO:0005575,GO:0008150	molecular_function|cellular_component|biological_process
6430550D23Rik	12.5983	16.8435	8.35309	0.49484	-1.01497	0.169605	0.715234	Down	0.091475	0.0463994	0.0733995	0.222685	0.0812878	0.125137	320095	RIKEN cDNA 6430550D23 gene	protein_coding			GO:0003836,GO:0006486,GO:0010706,GO:0016020,GO:0097503	beta-galactoside (CMP) alpha-2,3-sialyltransferase activity|protein glycosylation|ganglioside biosynthetic process via lactosylceramide|membrane|sialylation
6430571L13Rik	248.378	237.393	259.364	1.0924	0.127507	0.520946	0.922859	Up	3.11628	3.12504	2.35919	2.59656	2.54642	2.81753	235599	RIKEN cDNA 6430571L13 gene	protein_coding			GO:0003674,GO:0005575,GO:0008150,GO:0016020	molecular_function|cellular_component|biological_process|membrane
6430573P05Rik	15.4626	10.3079	20.6173	1.9871	0.990665	0.160623	0.705019	Up	0.183495	0.237859	0.163596	0.11581	0.0271766	0.156887	115489693	RIKEN cDNA 6430573P05 gene	non_coding			GO:0003674,GO:0005575,GO:0008150	molecular_function|cellular_component|biological_process
6430584L05Rik	3.15029	2.70933	3.59125	1.32583	0.406901	0.758771	0.968809	Up	0.00967005	0.0686699	0.0193981	0.0313874	0.0171863	0.0248035	330324	RIKEN cDNA 6430584L05 gene	non_coding
6430590A07Rik	4.75675	6.27284	3.24066	0.516337	-0.953615	0.483696	0.912872	Down	0.0578734	0.205488	0	0.305253	0.0514282	0.148444	619719	RIKEN cDNA 6430590A07 gene	non_coding			GO:0003674,GO:0005575,GO:0008150	molecular_function|cellular_component|biological_process
6430710C18Rik	23.6152	31.641	15.5894	0.493588	-1.01862	0.0528559	0.439389	Down	0.251821	0.22541	0.163432	0.372625	0.579186	0.35462	76218	RIKEN cDNA 6430710C18 gene	non_coding			GO:0003674,GO:0005575,GO:0008150	molecular_function|cellular_component|biological_process
6530402F18Rik	21.8223	27.0503	16.5944	0.614519	-0.702471	0.176282	0.721543	Down	0.0709933	0.144041	0.11393	0.184346	0.182952	0.169956	76220	RIKEN cDNA 6530402F18 gene	non_coding			GO:0003674,GO:0005575,GO:0008150	molecular_function|cellular_component|biological_process
6720468P15Rik	4.37106	6.20126	2.54085	0.407446	-1.29532	0.261166	0.799247	Down	0.0512106	0.0346345	0.0342428	0.0554072	0.0606766	0.189734	78073	RIKEN cDNA 6720468P15 gene	non_coding			GO:0003674,GO:0005575,GO:0008150	molecular_function|cellular_component|biological_process
6720483E21Rik	1.5656	2.04726	1.08395	0.526349	-0.925909	0.629082	0.946787	Down	0.0272056	0.0551987	0	0.0220763	0.0241758	0.116303	77741	RIKEN cDNA 6720483E21 gene	non_coding			GO:0003674,GO:0005575,GO:0008150	molecular_function|cellular_component|biological_process
6720489N17Rik	42.4134	36.9627	47.8641	1.29256	0.370231	0.376968	0.869156	Up	0.252168	0.236868	0.131146	0.159152	0.128641	0.199631	211378	RIKEN cDNA 6720489N17 gene	protein_coding			GO:0003674,GO:0005575,GO:0008150	molecular_function|cellular_component|biological_process
6820408C15Rik	2.00675	1.45448	2.55903	1.7404	0.799417	0.678724	0.95636	Up	0.0338334	0.0137292	0	0.0109818	0	0.0173564	228778	RIKEN cDNA 6820408C15 gene	protein_coding			GO:0003674,GO:0005575,GO:0008150	molecular_function|cellular_component|biological_process
8030431J09Rik	1.69493	2.67468	0.715177	0.268068	-1.89933	0.346349	0.849352	Down	0	0.00106424	0	0.000851267	0.000932225	0.00224234	105244251	RIKEN cDNA 8030431J09 gene	non_coding			GO:0003674,GO:0005575,GO:0008150	molecular_function|cellular_component|biological_process
8030453O22Rik	24.6276	22.445	26.8102	1.19797	0.260595	0.618681	0.945462	Up	0.504237	0.529803	0.307062	0.379942	0.480088	0.261751	77209	RIKEN cDNA 8030453O22 gene	non_coding			GO:0003674,GO:0005575,GO:0008150	molecular_function|cellular_component|biological_process
8030455M16Rik	1.76848	2.46001	1.07695	0.439668	-1.18551	0.566662	0.933602	Down	0	0.0342697	0.0677643	0.164471	0.0600376	0	77171	RIKEN cDNA 8030455M16 gene	non_coding			GO:0003674,GO:0005575,GO:0008150	molecular_function|cellular_component|biological_process
8030474K03Rik	53.883	54.3514	53.4145	0.981983	-0.0262297	0.955388	0.995252	Down	0.955099	0.726691	0.279406	0.570505	0.648338	0.816603	382231	RIKEN cDNA 8030474K03 gene	protein_coding			GO:0003674,GO:0005575,GO:0008150	molecular_function|cellular_component|biological_process
8430423G03Rik	2.62558	2.02241	3.22876	1.58408	0.663646	0.709538	0.961661	Up	0	0.193498	0.239137	0.077388	0	0.203849	71473	RIKEN cDNA 8430423G03 gene	non_coding			GO:0003674,GO:0005575,GO:0008150	molecular_function|cellular_component|biological_process
8430426J06Rik	32.357	45.6585	19.0555	0.418071	-1.25818	0.0393856	0.377983	Down	0.0994949	0.529908	0.698553	1.21104	1.06097	0.893208	78102	RIKEN cDNA 8430426J06 gene	non_coding			GO:0003674,GO:0005575,GO:0008150	molecular_function|cellular_component|biological_process
8430429K09Rik	92.1933	96.8539	87.5327	0.904308	-0.145113	0.594943	0.938657	Down	0.896533	1.14885	0.828231	1.1104	1.05876	1.02876	71523	RIKEN cDNA 8430429K09 gene	non_coding			GO:0003674,GO:0005575,GO:0008150	molecular_function|cellular_component|biological_process
8430432A02Rik	6.91507	4.4651	9.36504	2.08833	1.06235	0.259692	0.798636	Up	0.0820197	0.228818	0.226231	0.116473	0.0364427	0.105189	108167597	RIKEN cDNA 8430432A02 gene	non_coding			GO:0003674,GO:0005575,GO:0008150	molecular_function|cellular_component|biological_process
9030404E10Rik	2.0721	1.25485	2.88935	2.33172	1.22139	0.454091	0.905119	Up	0.0504058	0.0767029	0.0758355	0.0409023	0.0447923	0	71528	RIKEN cDNA 9030404E10 gene	non_coding			GO:0003674,GO:0005575,GO:0008150	molecular_function|cellular_component|biological_process
9030607J07Rik	4.48109	4.60893	4.35325	0.947013	-0.0785437	0.942874	0.994319	Down	0.0730003	0.0592454	0.0439315	0.094779	0.0648705	0.0249659	105244793	RIKEN cDNA 9030607J07 gene	non_coding			GO:0003674,GO:0005575,GO:0008150	molecular_function|cellular_component|biological_process
9030612E09Rik	1.93264	0.627426	3.23785	5.25602	2.39397	0.190496	0.735963	Up	0.0163205	0.0662266	0.0654777	0.0132434	0.0145029	0	74530	RIKEN cDNA 9030612E09 gene	non_coding			GO:0003674,GO:0005575,GO:0008150	molecular_function|cellular_component|biological_process
9030616G12Rik	5.21223	1.75577	8.6687	4.89475	2.29124	0.155922	0.698764	Up	0.189846	0	0.952078	0.11554	0	0.121738	77699	RIKEN cDNA 9030616G12 gene	non_coding			GO:0003674,GO:0005575,GO:0008150	molecular_function|cellular_component|biological_process
9030622O22Rik	74.9464	95.3704	54.5224	0.571485	-0.807212	0.147659	0.686701	Down	0.0586572	0.0446295	0.214321	0.200592	0.121004	0.243593	100043820	RIKEN cDNA 9030622O22 gene	non_coding			GO:0003674,GO:0005575,GO:0008150	molecular_function|cellular_component|biological_process
9030624G23Rik	69.5965	58.7211	80.472	1.36765	0.451701	0.39224	0.876646	Up	0.555763	0.14708	0.368389	0.211764	0.158897	0.442118	66808	RIKEN cDNA 9030624G23 gene	protein_coding			GO:0003674,GO:0005575,GO:0008150	molecular_function|cellular_component|biological_process
9130008F23Rik	34.0254	41.6017	26.4491	0.635007	-0.655157	0.108299	0.611071	Down	0.366942	0.300665	0.368043	0.480996	0.501657	0.675732	71583	RIKEN cDNA 9130008F23 gene	protein_coding			GO:0001835,GO:0003674,GO:0005575	blastocyst hatching|molecular_function|cellular_component
9130015G15Rik	3.96547	2.49238	5.43857	2.19914	1.13694	0.377676	0.869805	Up	0.0607705	0.01233	0.109715	0.0295877	0.0432022	0.0103917	108167511	RIKEN cDNA 9130015G15 gene	non_coding			GO:0003674,GO:0005575,GO:0008150	molecular_function|cellular_component|biological_process
9130019O22Rik	74.9055	77.5484	72.2626	0.930292	-0.104244	0.76025	0.968952	Down	0.683579	0.398547	0.488609	0.599328	0.439878	0.678505	78921	RIKEN cDNA 9130019O22 gene	protein_coding	mmu05168	Herpes simplex virus 1 infection	GO:0000978,GO:0000981,GO:0003712,GO:0005634,GO:0006357,GO:0071385,GO:0140297	RNA polymerase II cis-regulatory region sequence-specific DNA binding|DNA-binding transcription factor activity, RNA polymerase II-specific|transcription coregulator activity|nucleus|regulation of transcription by RNA polymerase II|cellular response to glucocorticoid stimulus|DNA-binding transcription factor binding			R-MMU-212436,R-MMU-73857,R-MMU-74160	Generic Transcription Pathway|RNA Polymerase II Transcription|Gene expression (Transcription)	zf-C2H2
9130019P16Rik	1.76757	2.08943	1.44572	0.689908	-0.535525	0.742256	0.967953	Down	0.00679231	0.00689061	0.0136254	0.00551169	0.0120718	0.0232295	100042056	RIKEN cDNA 9130019P16 gene	non_coding			GO:0003674,GO:0005575,GO:0008150	molecular_function|cellular_component|biological_process
9130023H24Rik	117.818	125.738	109.898	0.875267	-0.192204	0.465219	0.907844	Down	0.748782	1.00995	0.844906	0.863078	1.17956	0.95303	100043133	RIKEN cDNA 9130023H24 gene	protein_coding			GO:0000977,GO:0000981,GO:0003674,GO:0005575,GO:0005634,GO:0006357,GO:0008150	RNA polymerase II transcription regulatory region sequence-specific DNA binding|DNA-binding transcription factor activity, RNA polymerase II-specific|molecular_function|cellular_component|nucleus|regulation of transcription by RNA polymerase II|biological_process					zf-C2H2
9130024F11Rik	5.90451	7.44249	4.36652	0.588337	-0.765285	0.442914	0.899954	Down	0.0490402	0.0165833	0.0327915	0.0464266	0.0871576	0.0349409	329160	RIKEN cDNA 9130024F11 gene	non_coding			GO:0003674,GO:0005575,GO:0008150	molecular_function|cellular_component|biological_process
9130204K15Rik	42.2533	41.7794	42.7271	1.02437	0.0347319	0.944234	0.994319	Up	0.526235	0.546872	0.450573	0.708227	0.536064	0.230451	105242790	RIKEN cDNA 9130204K15 gene	non_coding			GO:0003674,GO:0005575,GO:0008150	molecular_function|cellular_component|biological_process
9130230L23Rik	43.8099	42.1069	45.513	1.08371	0.115975	0.796865	0.977136	Up	0.628686	0.80786	1.21911	0.578174	1.15459	0.734613	231253	RIKEN cDNA 9130230L23 gene	non_coding			GO:0003674,GO:0005575,GO:0008150	molecular_function|cellular_component|biological_process
9130401M01Rik	515.874	531.322	500.426	0.94221	-0.0858787	0.610062	0.943156	Down	9.19463	10.8626	12.3508	10.8988	12.1009	11.6826	75758	RIKEN cDNA 9130401M01 gene	protein_coding			GO:0003674,GO:0005575,GO:0008150	molecular_function|cellular_component|biological_process
9230009I02Rik	30.0042	32.8638	27.1447	0.823446	-0.280255	0.601641	0.940874	Down	0.662398	0.752622	0.584659	0.51601	0.517994	1.4725	619293	RIKEN cDNA 9230009I02 gene	non_coding			GO:0003674,GO:0005575,GO:0008150	molecular_function|cellular_component|biological_process
9230110K08Rik	3.88359	1.98776	5.77942	2.87003	1.52107	0.373518	0.867076	Up	0.118562	0.240555	0.0237834	0	0	0.141917	102631977	RIKEN cDNA 9230110K08 gene	non_coding			GO:0003674,GO:0005575,GO:0008150	molecular_function|cellular_component|biological_process
9230114K14Rik	41.5296	47.5439	35.5153	0.746199	-0.422368	0.354	0.853783	Down	0.561068	0.612971	0.245302	0.525329	0.575289	0.836416	414108	RIKEN cDNA 9230114K14 gene	non_coding			GO:0003674,GO:0005575,GO:0008150	molecular_function|cellular_component|biological_process
9230116L04Rik	2.39376	2.9933	1.79422	0.599708	-0.737667	0.631483	0.946787	Down	0	0.0386633	0.057339	0.0618523	0.0338674	0.0651705	321017	RIKEN cDNA 9230116L04 gene	non_coding			GO:0003674,GO:0005575,GO:0008150	molecular_function|cellular_component|biological_process
9230116N13Rik	9.41456	7.92609	10.903	1.3768	0.461319	0.542258	0.928556	Up	0.203426	0.103185	0.131166	0.0825361	0.129122	0.111811	320054	RIKEN cDNA 9230116N13 gene	non_coding			GO:0003674,GO:0005575,GO:0008150	molecular_function|cellular_component|biological_process
9330020H09Rik	20.4051	22.7456	18.0645	0.794841	-0.331262	0.566919	0.933602	Down	0.115553	0.162311	0.169391	0.0937663	0.229064	0.250791	100048895	RIKEN cDNA 9330020H09 gene	non_coding			GO:0003674,GO:0005575,GO:0008150	molecular_function|cellular_component|biological_process
9330102E08Rik	73.9284	67.0148	80.842	1.20367	0.267436	0.499828	0.916554	Up	0.704928	0.674954	0.397215	0.501322	0.295615	0.71106	330427	RIKEN cDNA 9330102E08 gene	non_coding			GO:0003674,GO:0005575,GO:0008150	molecular_function|cellular_component|biological_process
9330104G04Rik	30.9449	35.5119	26.3778	0.743518	-0.427561	0.311674	0.832128	Down	0.272665	0.401086	0.328179	0.46464	0.448254	0.442941	320950	RIKEN cDNA 9330104G04 gene	non_coding			GO:0003674,GO:0005575,GO:0008150	molecular_function|cellular_component|biological_process
9330133O14Rik	76.48	71.7538	81.2062	1.13217	0.17909	0.601387	0.940868	Up	0.529261	0.876605	1.04003	0.82389	0.64309	0.701859	100689703	RIKEN cDNA 9330133O14 gene	non_coding			GO:0003674,GO:0005575,GO:0008150	molecular_function|cellular_component|biological_process
9330136K24Rik	5.58132	4.67367	6.48897	1.3993	0.484707	0.646655	0.949494	Up	0.0369188	0.0749062	0.111089	0.0199721	0.0984219	0.0420871	319870	RIKEN cDNA 9330136K24 gene	non_coding			GO:0003674,GO:0005575,GO:0008150	molecular_function|cellular_component|biological_process
9330151L19Rik	80.1841	78.4599	81.9082	1.04267	0.060287	0.878189	0.987788	Up	0.646268	1.33552	0.75624	0.864323	0.56366	1.23813	414085	RIKEN cDNA 9330151L19 gene	non_coding			GO:0003674,GO:0005575,GO:0008150	molecular_function|cellular_component|biological_process
9330159F19Rik	3.21113	2.11655	4.30571	2.03563	1.02547	0.513178	0.919714	Up	0	0.0241042	0.0333643	0.0192806	0.00422286	0.00406299	212448	RIKEN cDNA 9330159F19 gene	protein_coding			GO:0003674,GO:0005575,GO:0008150	molecular_function|cellular_component|biological_process
9330159M07Rik	6.43117	7.77855	5.08379	0.649054	-0.623589	0.594516	0.938657	Down	0.0648765	0.0329077	0.0542259	0.0350965	0.00960857	0.203386	319673	RIKEN cDNA 9330159M07 gene	non_coding			GO:0003674,GO:0005575,GO:0008150	molecular_function|cellular_component|biological_process
9330162012Rik	16.1733	14.2374	18.1093	1.26584	0.340093	0.589452	0.93746	Up	0.352858	0.294794	0.395553	0.303173	0.129114	0.40817	493800	cDNA RIKEN 9330162012 gene	non_coding			GO:0003674,GO:0005575,GO:0008150	molecular_function|cellular_component|biological_process
9330198I05Rik	2.17538	1.84763	2.50312	1.36141	0.445101	0.822388	0.981214	Up	0	0.106224	0	0.0121382	0.0398777	0.0255787	77560	RIKEN cDNA 9330198I05 gene	non_coding			GO:0003674,GO:0005575,GO:0008150	molecular_function|cellular_component|biological_process
9330198N18Rik	6.59376	8.4564	4.73111	0.558237	-0.84105	0.402949	0.882364	Down	0.0792613	0.0459476	0.022714	0.1562	0.0503102	0.0580867	77516	RIKEN cDNA 9330198N18 gene	non_coding			GO:0003674,GO:0005575,GO:0008150	molecular_function|cellular_component|biological_process
9430015G10Rik	525.777	567.681	483.873	0.851918	-0.231214	0.276873	0.808227	Down	5.46404	5.53149	4.40043	5.30761	4.88607	8.2465	230996	RIKEN cDNA 9430015G10 gene	protein_coding			GO:0003674,GO:0005575,GO:0008150	molecular_function|cellular_component|biological_process
9430037G07Rik	7.19105	5.7546	8.6275	1.50087	0.5858	0.555906	0.931125	Up	0.0191818	0.107027	0.105816	0.0856091	0.0340912	0.0328006	320692	RIKEN cDNA 9430037G07 gene	non_coding			GO:0003674,GO:0005575,GO:0008150	molecular_function|cellular_component|biological_process
9430038I01Rik	298.166	327.637	268.695	0.819984	-0.286332	0.251909	0.790986	Down	2.22902	2.31537	3.42308	2.47514	3.21284	4.20368	77252	RIKEN cDNA 9430038I01 gene	protein_coding			GO:0003674,GO:0005575,GO:0008150	molecular_function|cellular_component|biological_process
9430060I03Rik	3.6985	4.53211	2.86489	0.633712	-0.658101	0.624733	0.945581	Down	0	0.109809	0.0361891	0.0878347	0.0641254	0.0771223	100037260	RIKEN cDNA 9430060I03 gene	non_coding			GO:0003674,GO:0005575,GO:0008150	molecular_function|cellular_component|biological_process
9430065F17Rik	2.08351	0.886546	3.28048	3.65731	1.87078	0.280493	0.810256	Up	0.106988	0.0217074	0.0643856	0.0347268	0	0.0182949	77857	RIKEN cDNA 9430065F17 gene	non_coding			GO:0003674,GO:0005575,GO:0008150	molecular_function|cellular_component|biological_process
9430078G10Rik	1.7408	0.585256	2.89635	4.864	2.28214	0.223773	0.771668	Up	0.0253708	0.0343173	0.00848229	0.00686247	0	0.00723061	115489041	RIKEN cDNA 9430078G10 gene	protein_coding
9430078K24Rik	2.69954	0.627426	4.77165	7.70621	2.94602	0.139797	0.675019	Up	0.230518	0.0425189	0	0.0170051	0.0186224	0	77290	RIKEN cDNA 9430078K24 gene	non_coding			GO:0003674,GO:0005575,GO:0008150	molecular_function|cellular_component|biological_process
9430083A17Rik	72.4017	70.0907	74.7127	1.06432	0.0899343	0.780917	0.973063	Up	0.845832	0.671984	0.592836	0.545779	0.597685	0.880014	77428	RIKEN cDNA 9430083A17 gene	non_coding			GO:0003674,GO:0005575,GO:0008150	molecular_function|cellular_component|biological_process
9430085M18Rik	15.8634	18.3145	13.4124	0.733186	-0.447749	0.449753	0.903077	Down	0.157877	0.125842	0.135729	0.22877	0.200422	0.144626	77361	RIKEN cDNA 9430085M18 gene	non_coding			GO:0003674,GO:0005575,GO:0008150	molecular_function|cellular_component|biological_process
9430091E24Rik	88.5541	68.6845	108.424	1.57728	0.657439	0.0343863	0.353552	Up	0.969666	1.40032	1.07555	0.888673	0.547419	0.760782	434350	RIKEN cDNA 9430091E24 gene	non_coding			GO:0003674,GO:0005575,GO:0008150	molecular_function|cellular_component|biological_process
9530018F02Rik	30.4033	33.9272	26.8794	0.790363	-0.339413	0.469101	0.908766	Down	0.263879	0.173217	0.14012	0.239319	0.193111	0.31188	77402	RIKEN cDNA 9530018F02 gene	non_coding			GO:0003674,GO:0005575,GO:0008150	molecular_function|cellular_component|biological_process
9530026P05Rik	13.589	11.9573	15.2206	1.27673	0.352457	0.57608	0.934789	Up	0.489975	0.465999	0.337868	0.298197	0.435408	0.288011	330385	RIKEN cDNA 9530026P05 gene	non_coding			GO:0003674,GO:0005575,GO:0008150	molecular_function|cellular_component|biological_process
9530027J09Rik	18.299	15.6497	20.9483	1.33291	0.414579	0.535905	0.927616	Up	0.289504	0.513964	0.254076	0.293652	0.0964737	0.417697	100500713	RIKEN cDNA 9530027J09 gene	non_coding
9530036M11Rik	2.54776	3.66517	1.43035	0.391427	-1.35318	0.536647	0.927616	Down	0	0.00968778	0	0.0193728	0.00424304	0	78616	RIKEN cDNA 9530036M11 gene	non_coding			GO:0003674,GO:0005575,GO:0008150	molecular_function|cellular_component|biological_process
9530051G07Rik	12.8508	8.70572	16.996	1.94752	0.961636	0.170438	0.715874	Up	0.0897404	0.0910391	0.1454	0.084024	0.0306717	0.053119	319781	RIKEN cDNA 9530051G07 gene	non_coding			GO:0003674,GO:0005575,GO:0008150	molecular_function|cellular_component|biological_process
9530052C20Rik	16.3804	15.4289	17.3319	1.12364	0.168178	0.775632	0.972283	Up	0.118064	0.199621	0.157891	0.183625	0.113658	0.12618	320229	RIKEN cDNA 9530052C20 gene	non_coding			GO:0003674,GO:0005575,GO:0008150	molecular_function|cellular_component|biological_process
9530052E02Rik	3.69004	2.34102	5.03906	2.13374	1.09338	0.418788	0.887802	Up	0.0638791	0.226812	0.160177	0.103671	0	0.109232	619321	RIKEN cDNA 9530052E02 gene	non_coding			GO:0003674,GO:0005575,GO:0008150	molecular_function|cellular_component|biological_process
9530057J20Rik	2.37901	3.66289	1.09513	0.298216	-1.74557	0.272117	0.805792	Down	0.0235292	0.0119349	0	0.0477326	0.0418177	0.0301759	78672	RIKEN cDNA 9530057J20 gene	protein_coding			GO:0003674,GO:0005575,GO:0008150	molecular_function|cellular_component|biological_process
9530062K07Rik	31.9805	31.0349	32.9262	1.05853	0.0820677	0.870236	0.987315	Up	1.16447	1.45696	0.934371	0.661445	0.931309	1.85848	78739	RIKEN cDNA 9530062K07 gene	non_coding			GO:0003674,GO:0005575,GO:0008150	molecular_function|cellular_component|biological_process
9530068E07Rik	3801.99	3627.18	3976.81	1.09643	0.132813	0.283264	0.811717	Up	46.9468	42.1381	47.2734	38.7269	43.277	43.7718	213673	RIKEN cDNA 9530068E07 gene	protein_coding			GO:0003674,GO:0005575,GO:0008150,GO:0016020	molecular_function|cellular_component|biological_process|membrane
9530080O11Rik	2.54551	4.01615	1.07486	0.269079	-1.8939	0.3174	0.836052	Down	0	0.0357562	0.0176759	0.128704	0.0626419	0	319247	RIKEN cDNA 9530080O11 gene	non_coding			GO:0003674,GO:0005575,GO:0008150	molecular_function|cellular_component|biological_process
9530082P21Rik	213.515	189.203	237.828	1.2557	0.328497	0.281632	0.810334	Up	2.50547	2.268	1.58511	1.25895	1.35299	2.58706	638247	RIKEN cDNA 9530082P21 gene	non_coding			GO:0003674,GO:0005575,GO:0008150	molecular_function|cellular_component|biological_process
9630002D21Rik	2.05458	1.19536	2.9138	2.42447	1.27767	0.461157	0.907738	Up	0.036612	0	0.0367218	0.00742729	0.00813366	0.0156515	319560	RIKEN cDNA 9630002D21 gene	non_coding
9630028B13Rik	2.74844	1.52149	3.97539	2.61947	1.38928	0.298312	0.823433	Up	0.0268382	0.0363021	0.0358916	0.00725938	0.0158996	0.0152977	319562	RIKEN cDNA 9630028B13 gene	non_coding
9830107B12Rik	37.7376	30.9399	44.5353	1.43983	0.525901	0.18522	0.729243	Up	0.306342	0.332457	0.24295	0.237022	0.189925	0.188826	328829	RIKEN cDNA 9830107B12 gene	protein_coding			GO:0009986,GO:0038023	cell surface|signaling receptor activity
9830132P13Rik	2.30069	2.04726	2.55412	1.23618	0.305886	0.855789	0.98672	Up	0.0291025	0	0.0218923	0.00590388	0.00646537	0.031103	329753	RIKEN cDNA 9830132P13 gene	non_coding
9930012K11Rik	1013.31	1013.66	1012.96	0.999039	-0.00138726	0.991912	0.999115	Down	14.4834	14.942	13.7574	13.3587	13.2385	17.263	268759	RIKEN cDNA 9930012K11 gene	protein_coding			GO:0003674,GO:0008150	molecular_function|biological_process
9930014A18Rik	16.6541	13.4216	19.8867	1.48436	0.569837	0.374762	0.868214	Up	0.0831549	0.0662815	0.178723	0.0819362	0.0791724	0.0609401	320469	RIKEN cDNA 9930014A18 gene	non_coding			GO:0003674,GO:0005575,GO:0008150	molecular_function|cellular_component|biological_process
9930021J03Rik	1533.09	1567.7	1498.48	0.955701	-0.0653685	0.667164	0.954934	Down	2.47614	2.54655	2.07163	2.58732	2.14738	2.77858	240613	RIKEN cDNA 9930021J03 gene	protein_coding			GO:0003674,GO:0005575,GO:0008150	molecular_function|cellular_component|biological_process
9930038B18Rik	5.7402	4.56676	6.91365	1.514	0.598363	0.588056	0.937133	Up	0.445183	0.0501806	0.446518	0.32111	0.175824	0.126876	319503	RIKEN cDNA 9930038B18 gene	non_coding			GO:0003674,GO:0005575,GO:0008150	molecular_function|cellular_component|biological_process
9930104L06Rik	189.767	182.976	196.558	1.07293	0.101557	0.664803	0.954159	Up	1.75959	1.82473	1.75507	1.43577	1.36384	2.27338	194268	RIKEN cDNA 9930104L06 gene	protein_coding			GO:0003674,GO:0005634,GO:0005654,GO:0005730,GO:0005737,GO:0005829,GO:0008150,GO:0042254,GO:0042273	molecular_function|nucleus|nucleoplasm|nucleolus|cytoplasm|cytosol|biological_process|ribosome biogenesis|ribosomal large subunit biogenesis
9930111J21Rik1	52.7909	55.7742	49.8076	0.892973	-0.163311	0.68733	0.957651	Down	0.252408	0.456107	0.387658	0.262424	0.420558	0.566492	667214	RIKEN cDNA 9930111J21 gene 1	protein_coding			GO:0003924,GO:0005789,GO:0006952,GO:0035458	GTPase activity|endoplasmic reticulum membrane|defense response|cellular response to interferon-beta
9930111J21Rik2	10.182	13.4812	6.88291	0.508064	-0.976917	0.251949	0.790988	Down	0.0887608	0.0900453	0.0635907	0.123473	0.0563399	0.314401	245240	RIKEN cDNA 9930111J21 gene 2	protein_coding			GO:0003674,GO:0005575,GO:0008150	molecular_function|cellular_component|biological_process
A030001D20Rik	41.3204	43.8891	38.7517	0.884725	-0.176699	0.679456	0.956613	Down	0.70473	0.714929	0.576636	0.87284	0.88993	0.491545	100126243	RIKEN cDNA A030001D20 gene	non_coding			GO:0003674,GO:0005575,GO:0008150	molecular_function|cellular_component|biological_process
A130010J15Rik	254.683	266.582	242.784	0.910154	-0.135817	0.478791	0.91133	Down	1.51558	1.64733	1.70833	1.59878	1.60332	2.23373	319266	RIKEN cDNA A130010J15 gene	protein_coding			GO:0003674,GO:0005575,GO:0008150	molecular_function|cellular_component|biological_process
A130051J06Rik	20.0029	15.0283	24.9775	1.6591	0.730403	0.238432	0.778154	Up	0.092401	0.0669558	0.145637	0.0928321	0.0351903	0.0564301	791370	RIKEN cDNA A130051J0 gene	non_coding			GO:0003674,GO:0005575,GO:0008150	molecular_function|cellular_component|biological_process
A1cf	27.9634	10.5051	45.4216	4.34241	2.1185	0.00207797	0.0674691	Up	0.242255	0.0637158	0.256481	0.0546057	0.0558123	0.0191784	69865	APOBEC1 complementation factor	protein_coding			GO:0000792,GO:0003676,GO:0003723,GO:0003727,GO:0003729,GO:0005515,GO:0005634,GO:0005654,GO:0005737,GO:0005783,GO:0006397,GO:0007566,GO:0010609,GO:0016554,GO:0016556,GO:0030895,GO:0045293,GO:0050714,GO:0050821,GO:0140767,GO:1901537,GO:2000623	heterochromatin|nucleic acid binding|RNA binding|single-stranded RNA binding|mRNA binding|protein binding|nucleus|nucleoplasm|cytoplasm|endoplasmic reticulum|mRNA processing|embryo implantation|mRNA localization resulting in post-transcriptional regulation of gene expression|cytidine to uridine editing|mRNA modification|apolipoprotein B mRNA editing enzyme complex|mRNA editing complex|positive re…			R-MMU-72200,R-MMU-75072,R-MMU-75094,R-MMU-8953854	mRNA Editing: C to U Conversion|mRNA Editing|Formation of the Editosome|Metabolism of RNA
A230001M10Rik	33.1888	50.8616	15.516	0.305683	-1.70989	0.00156743	0.0563617	Down	0.179814	0.397999	0.131166	0.848943	0.900628	0.559054	319951	RIKEN cDNA A230001M10 gene	non_coding			GO:0003674,GO:0005575,GO:0008150	molecular_function|cellular_component|biological_process
A230045G11Rik	150.253	155.25	145.257	0.93581	-0.0957121	0.740631	0.967368	Down	0.387672	0.540304	0.537828	0.343981	0.576311	0.672207	624086	RIKEN cDNA A230045G11 gene	non_coding			GO:0003674,GO:0005575,GO:0008150	molecular_function|cellular_component|biological_process
A230056P14Rik	8.78738	13.2236	4.35115	0.32768	-1.60964	0.181887	0.727449	Down	0.108435	0.110005	0.0435042	0.0351964	0.0578156	0.760233	320845	RIKEN cDNA A230056P14 gene	non_coding			GO:0003674,GO:0005575,GO:0008150	molecular_function|cellular_component|biological_process
A230057D06Rik	1.40436	0.283966	2.52476	7.74885	2.95398	0.19058	0.735963	Up	0.0152047	0.0154248	0.0762518	0	0	0.0129999	319893	RIKEN cDNA A230057D06 gene	non_coding			GO:0003674,GO:0005575,GO:0008150	molecular_function|cellular_component|biological_process
A230072C01Rik	56.9206	57.4895	56.3517	0.978264	-0.0317036	0.936779	0.993203	Down	0.53991	0.758387	0.874779	0.674024	0.479782	1.11262	320742	RIKEN cDNA A230072C01 gene	non_coding			GO:0003674,GO:0005575,GO:0008150	molecular_function|cellular_component|biological_process
A230087F16Rik	1.9552	0.652272	3.25812	5.16479	2.36871	0.214971	0.76285	Up	0.012464	0.0126444	0.0125014	0	0.00738395	0	100503323	RIKEN cDNA A230087F16 gene	non_coding			GO:0003674,GO:0005575,GO:0008150	molecular_function|cellular_component|biological_process
A230103J11Rik	2.76762	3.02794	2.5073	0.830021	-0.26878	0.861173	0.98672	Down	0	0.0724936	0.0286695	0.0695839	0.0254005	0.0244389	320466	RIKEN cDNA A230103J11 gene	non_coding			GO:0003674,GO:0005575,GO:0008150	molecular_function|cellular_component|biological_process
A230107N01Rik	5.84656	3.4113	8.28182	2.44891	1.29214	0.213177	0.76155	Up	0.0519085	0.171144	0.0780964	0.0210609	0.0691915	0.0332861	320919	RIKEN cDNA A230107N01 gene	non_coding			GO:0003674,GO:0005575,GO:0008150	molecular_function|cellular_component|biological_process
A2m	9745.16	9162.35	10328	1.12723	0.172783	0.546919	0.92889	Up	40.3706	27.0318	67.8854	38.0996	45.7086	37.1403	232345	alpha-2-macroglobulin	protein_coding	mmu04610	Complement and coagulation cascades	GO:0001869,GO:0002020,GO:0004866,GO:0004867,GO:0005102,GO:0005515,GO:0005576,GO:0005615,GO:0007565,GO:0010466,GO:0010951,GO:0019838,GO:0019899,GO:0019959,GO:0019966,GO:0030414,GO:0042802,GO:0043120,GO:0048306,GO:0048403,GO:0048406,GO:0048863	negative regulation of complement activation, lectin pathway|protease binding|endopeptidase inhibitor activity|serine-type endopeptidase inhibitor activity|signaling receptor binding|protein binding|extracellular region|extracellular space|female pregnancy|negative regulation of peptidase activity|negative regulation of endopeptidase activity|growth factor binding|enzyme binding|interleukin-8 bin…			R-MMU-109582,R-MMU-114608,R-MMU-140837,R-MMU-140877,R-MMU-1474228,R-MMU-1474244,R-MMU-174824,R-MMU-382551,R-MMU-76002,R-MMU-76005,R-MMU-8963896,R-MMU-8963898	Hemostasis|Platelet degranulation |Intrinsic Pathway of Fibrin Clot Formation|Formation of Fibrin Clot (Clotting Cascade)|Degradation of the extracellular matrix|Extracellular matrix organization|Plasma lipoprotein assembly, remodeling, and clearance|Transport of small molecules|Platelet activation, signaling and aggregation|Response to elevated platelet cytosolic Ca2+|HDL assembly|Plasma lipopro…
A2ml1	9.13328	9.5636	8.70296	0.91105	-0.134398	0.918217	0.991257	Down	0.0518865	0.00657967	0.0975789	0.115785	0.0518716	0	232400	alpha-2-macroglobulin like 1	protein_coding			GO:0004866,GO:0004867,GO:0005575,GO:0005576,GO:0005615,GO:0010466,GO:0030414	endopeptidase inhibitor activity|serine-type endopeptidase inhibitor activity|cellular_component|extracellular region|extracellular space|negative regulation of peptidase activity|peptidase inhibitor activity
A330001L22Rik	3.19093	2.41556	3.9663	1.64239	0.715796	0.572781	0.934705	Up	0.00777106	0.015767	0.0194859	0.00315295	0.0103584	0.0132884	102632594	RIKEN cDNA A330001L22 gene	non_coding			GO:0003674,GO:0005575,GO:0008150	molecular_function|cellular_component|biological_process
A330009N23Rik	39.3036	37.7098	40.8973	1.08525	0.118032	0.787314	0.974839	Up	0.651955	0.76582	0.533453	0.821398	0.533611	0.440066	380977	RIKEN cDNA A330009N23 gene	non_coding			GO:0003674,GO:0005575,GO:0008150	molecular_function|cellular_component|biological_process
A330015K06Rik	16.2238	25.1965	7.25097	0.28813	-1.79521	0.00903918	0.170581	Down	0.0970834	0.0422093	0.139107	0.337626	0.406709	0.225301	102637797	RIKEN cDNA A330015K06 gene	non_coding			GO:0003674,GO:0005575,GO:0008150	molecular_function|cellular_component|biological_process
A330023F24Rik	93.994	97.9564	90.0316	0.91781	-0.123732	0.749959	0.968248	Down	0.445764	0.624771	0.400038	0.642529	0.27103	0.712102	320977	RIKEN cDNA A330023F24 gene	non_coding
A330035P11Rik	57.8431	57.8019	57.8842	1.00139	0.00200944	0.995498	0.999232	Up	0.595694	0.798152	0.417109	0.611068	0.569305	0.64385	319727	RIKEN cDNA A330035P11 gene	non_coding			GO:0003674,GO:0005575,GO:0008150	molecular_function|cellular_component|biological_process
A330041J22Rik	3.09628	3.66289	2.52967	0.692338	-0.530452	0.666546	0.954934	Down	0.033066	0.0503168	0.0331652	0.0670794	0.0587671	0.0424068	319556	RIKEN cDNA A330041J22 gene	non_coding			GO:0003674,GO:0005575,GO:0008150	molecular_function|cellular_component|biological_process
A330049N07Rik	2.86744	2.12407	3.6108	1.70195	0.767191	0.561326	0.933099	Up	0.0306388	0.0310822	0.0921922	0.0372933	0.0272267	0.026196	327768	RIKEN cDNA A330049N07 gene	non_coding			GO:0003674,GO:0005575,GO:0008150	molecular_function|cellular_component|biological_process
A330069E16Rik	12.315	13.097	11.5329	0.878807	-0.186381	0.803164	0.977693	Down	0.204957	0.519808	0.376882	0.221753	0.333909	0.730154	606735	RIKEN cDNA A330069E16 gene	non_coding			GO:0003674,GO:0005575,GO:0009611	molecular_function|cellular_component|response to wounding
A330076C08Rik	65.6519	75.7552	55.5486	0.73442	-0.445322	0.432103	0.893677	Down	0.566304	1.29262	0.583781	1.3786	1.52369	0.36314	100503592	RIKEN cDNA A330076C08 gene	non_coding			GO:0003674,GO:0005575,GO:0008150	molecular_function|cellular_component|biological_process
A330093E20Rik	1.43804	0.326136	2.54994	7.81386	2.96604	0.175002	0.71991	Up	0.0506362	0.0256845	0.012697	0	0.0112493	0	107003	RIKEN cDNA A330093E20 gene	non_coding			GO:0003674,GO:0005575,GO:0008150	molecular_function|cellular_component|biological_process
A330102I10Rik	2.35404	1.47932	3.22876	2.17168	1.11881	0.501185	0.916564	Up	0	0.0871354	0.107687	0.0174246	0.0190817	0.055078	77920	RIKEN cDNA A330102I10 gene	non_coding			GO:0003674,GO:0005575,GO:0008150	molecular_function|cellular_component|biological_process
A3galt2	2.68878	2.85699	2.52058	0.874804	-0.192968	0.907996	0.990571	Down	0.00898829	0.0273551	0.0270458	0.00729365	0	0.0691643	215493	alpha 1%2C3-galactosyltransferase 2 (isoglobotriaosylceramide synthase)	protein_coding	mmu00603	Glycosphingolipid biosynthesis - globo and isoglobo series	GO:0001962,GO:0005794,GO:0005975,GO:0006629,GO:0006688,GO:0016020,GO:0016740,GO:0016757,GO:0016758,GO:0030259,GO:0031982,GO:0046872,GO:0047276,GO:0071287	alpha-1,3-galactosyltransferase activity|Golgi apparatus|carbohydrate metabolic process|lipid metabolic process|glycosphingolipid biosynthetic process|membrane|transferase activity|glycosyltransferase activity|hexosyltransferase activity|lipid glycosylation|vesicle|metal ion binding|N-acetyllactosaminide 3-alpha-galactosyltransferase activity|cellular response to manganese ion
A430005L14Rik	432.002	474	390.003	0.823061	-0.280929	0.0966819	0.585488	Down	9.07449	9.48734	11.5233	11.4395	12.8233	12.6463	97159	RIKEN cDNA A430005L14 gene	protein_coding			GO:0003674,GO:0005634,GO:0005654,GO:0008150	molecular_function|nucleus|nucleoplasm|biological_process
A430018G15Rik	23.8732	16.3343	31.412	1.91449	0.936958	0.084079	0.548715	Up	0.167727	0.275487	0.25635	0.110179	0.070975	0.191207	115489452	RIKEN cDNA A430018G15 gene	non_coding			GO:0003674,GO:0005575,GO:0008150	molecular_function|cellular_component|biological_process
A430033K04Rik	91.3416	82.633	100.05	1.21322	0.278836	0.369618	0.865488	Up	0.676259	1.01927	0.998052	0.713385	0.892835	0.619497	243308	RIKEN cDNA A430033K04 gene	protein_coding	mmu05168	Herpes simplex virus 1 infection	GO:0000122,GO:0000977,GO:0001227,GO:0005634,GO:0006355,GO:0045667,GO:0045892,GO:0046872	negative regulation of transcription by RNA polymerase II|RNA polymerase II transcription regulatory region sequence-specific DNA binding|DNA-binding transcription repressor activity, RNA polymerase II-specific|nucleus|regulation of DNA-templated transcription|regulation of osteoblast differentiation|negative regulation of DNA-templated transcription|metal ion binding			R-MMU-212436,R-MMU-73857,R-MMU-74160	Generic Transcription Pathway|RNA Polymerase II Transcription|Gene expression (Transcription)	zf-C2H2
A430035B10Rik	7.65055	6.92283	8.37827	1.20657	0.270908	0.754641	0.96859	Up	0.204604	0.0957994	0.063144	0.102171	0.0839162	0.121109	320312	RIKEN cDNA A430035B10 gene	non_coding			GO:0003674,GO:0005575,GO:0008150	molecular_function|cellular_component|biological_process
A430046D13Rik	40.891	40.5586	41.2234	1.01492	0.0213602	0.95642	0.995359	Up	0.491683	0.669815	0.450887	0.547175	0.411959	0.648595	654440	Riken cDNA A430046D13 gene	non_coding			GO:0003674,GO:0005575,GO:0008150	molecular_function|cellular_component|biological_process
A430057M04Rik	4.26209	4.91547	3.60871	0.737165	-0.43994	0.700574	0.960601	Down	0.0129689	0.0197348	0.0325194	0.0105237	0.0460982	0.0332648	319486	RIKEN cDNA A430057M04 gene	protein_coding			GO:0003674,GO:0005575,GO:0008150	molecular_function|cellular_component|biological_process
A430078I02Rik	12.8891	15.7106	10.0677	0.641609	-0.640235	0.40857	0.884433	Down	0.0441439	0.212718	0.0553454	0.161195	0.147104	0.179278	320486	RIKEN cDNA A430078I02 gene	non_coding			GO:0003674,GO:0005575,GO:0008150	molecular_function|cellular_component|biological_process
A430093F15Rik	1.81919	2.18357	1.45481	0.668997	-0.579929	0.746599	0.968248	Down	0.0288135	0.0146153	0.01445	0.0467621	0.038407	0	403202	RIKEN cDNA A430093F15 gene	non_coding			GO:0003674,GO:0005575,GO:0008150	molecular_function|cellular_component|biological_process
A430105J06Rik	8.06783	8.53477	7.6009	0.88693	-0.173109	0.867288	0.98672	Down	0.0406542	0.0618638	0.00509702	0.0412366	0.0135475	0.0695181	77189	RIKEN cDNA A430105J06 gene	non_coding			GO:0003674,GO:0005575,GO:0008150	molecular_function|cellular_component|biological_process
A430108G06Rik	2.6233	4.88692	0.359681	0.0792597	-3.65727	0.0777462	0.529684	Down	0	0	0.0198711	0.0160764	0.0176053	0.254082	319650	RIKEN cDNA A430108G06 gene	non_coding			GO:0003674,GO:0005575,GO:0008150	molecular_function|cellular_component|biological_process
A4galt	1595.69	1528.08	1663.3	1.08875	0.122676	0.4962	0.915209	Up	17.9129	18.445	20.1619	14.6845	21.2856	16.319	239559	alpha 1%2C4-galactosyltransferase	protein_coding	mmu00601,mmu00603	Glycosphingolipid biosynthesis - lacto and neolacto series|Glycosphingolipid biosynthesis - globo and isoglobo series	GO:0001576,GO:0005794,GO:0006493,GO:0006629,GO:0007009,GO:0008375,GO:0008378,GO:0015643,GO:0016020,GO:0016740,GO:0016757,GO:0050512	globoside biosynthetic process|Golgi apparatus|protein O-linked glycosylation|lipid metabolic process|plasma membrane organization|acetylglucosaminyltransferase activity|galactosyltransferase activity|toxic substance binding|membrane|transferase activity|glycosyltransferase activity|lactosylceramide 4-alpha-galactosyltransferase activity
A530013C23Rik	12.3258	9.04833	15.6033	1.73337	0.793581	0.357137	0.855717	Up	0.220301	0.0558722	0.317632	0.0893826	0.195766	0.058861	329562	RIKEN cDNA A530013C23 gene	non_coding			GO:0003674,GO:0005575,GO:0008150	molecular_function|cellular_component|biological_process
A530016L24Rik	155.535	40.4706	270.599	6.68529	2.74099	0.00468369	0.113449	Up	1.95553	2.82392	2.74195	0.874378	0.115259	0.110895	319942	RIKEN cDNA A530016L24 gene	protein_coding			GO:0003674,GO:0005886,GO:0008150,GO:0016020	molecular_function|plasma membrane|biological_process|membrane
A530020G20Rik	25.3282	14.2668	36.3896	2.54282	1.34643	0.0514255	0.433118	Up	0.204716	0.579313	0.313398	0.236063	0.0382984	0.156606	319839	RIKEN cDNA A530020G20 gene	non_coding			GO:0003674,GO:0005575,GO:0008150	molecular_function|cellular_component|biological_process
A530032D15Rik	7.52014	10.3476	4.69266	0.455554	-1.13431	0.298109	0.823433	Down	0.0333252	0.0563457	0.0557085	0.13521	0.167812	0.00949759	381287	RIKEN cDNA A530032D15Rik gene	protein_coding			GO:0000981,GO:0001650,GO:0005634,GO:0005739,GO:0006357	DNA-binding transcription factor activity, RNA polymerase II-specific|fibrillar center|nucleus|mitochondrion|regulation of transcription by RNA polymerase II
A530046M15Rik	45.0449	40.5169	49.573	1.22731	0.295502	0.524472	0.924594	Up	0.911336	1.1657	0.655745	0.691284	1.07392	0.457348	328190	RIKEN cDNA A530046M15 gene	non_coding
A530064D06Rik	5.57316	7.84557	3.30075	0.417888	-1.25881	0.361007	0.859564	Down	0.112259	0	0.0321702	0.0390402	0.0427531	0.287942	328830	RIKEN cDNA A530064D06 gene	protein_coding			GO:0005515,GO:0009986,GO:0038023	protein binding|cell surface|signaling receptor activity
A530072M11Rik	39.3449	36.0529	42.637	1.17955	0.23824	0.588457	0.937362	Up	0.526485	0.767775	0.66008	0.427222	0.39475	0.872148	100415915	RIKEN cDNA gene A530072M11	non_coding
A630001G21Rik	15.6633	11.8135	19.5131	1.65265	0.724784	0.211941	0.760436	Up	0.191316	0.284658	0.217476	0.113847	0.147342	0.163574	319997	RIKEN cDNA A630001G21 gene	protein_coding			GO:0000981,GO:0005634,GO:0006357	DNA-binding transcription factor activity, RNA polymerase II-specific|nucleus|regulation of transcription by RNA polymerase II
A630023A22Rik	8.27203	3.57103	12.973	3.6137	1.85348	0.0619333	0.476286	Up	0.113865	0.231026	0.479668	0.129356	0.0202369	0.0778831	105518	RIKEN cDNA A630023A22 gene	protein_coding			GO:0003674,GO:0005575,GO:0008150	molecular_function|cellular_component|biological_process
A630026N12Rik	115.911	126.97	104.851	0.825138	-0.277293	0.442047	0.899499	Down	0.511628	0.755481	0.393425	0.839559	0.409185	0.782529	320961	RIKEN cDNA A630026N12 gene	non_coding			GO:0003674,GO:0005575,GO:0008150	molecular_function|cellular_component|biological_process
A630034I12Rik	42.8671	52.0348	33.6994	0.645864	-0.630697	0.200346	0.748011	Down	0.0886501	0.084794	0.0635114	0.108932	0.0607712	0.207895	329790	RIKEN cDNA A630034I12 gene	non_coding			GO:0003674,GO:0005575,GO:0008150	molecular_function|cellular_component|biological_process
A630066F11Rik	28.9398	32.075	25.8045	0.802516	-0.317398	0.532372	0.926857	Down	0.826808	0.493396	0.414644	0.532791	0.626681	1.06037	320642	RIKEN cDNA A630066F11 gene	non_coding			GO:0003674,GO:0005575,GO:0008150	molecular_function|cellular_component|biological_process
A630072L19Rik	2.78916	4.84987	0.728451	0.15058	-2.7314	0.189585	0.735158	Down	0.00725138	0	0.00727313	0	0.0902135	0.00619988	100038467	RIKEN cDNA A630072L19 gene	non_coding			GO:0003674,GO:0005575,GO:0008150	molecular_function|cellular_component|biological_process
A630072M18Rik	109.579	115.253	103.904	0.900967	-0.150454	0.562646	0.933114	Down	0.540693	0.53709	0.547964	0.475314	0.590588	0.770481	320770	RIKEN cDNA A630072M18 gene	non_coding
A630077J23Rik	2.64376	2.34855	2.93898	1.24062	0.311061	0.852984	0.98672	Up	0.222876	0.0323002	0	0.0516729	0.0282936	0.136112	319973	RIKEN cDNA A630077J23 gene	non_coding			GO:0003674,GO:0005575,GO:0008150	molecular_function|cellular_component|biological_process
A630089N07Rik	21.4764	25.2396	17.7133	0.702301	-0.509839	0.430487	0.893047	Down	0.228778	0.391649	0.0860489	0.440905	0.304949	0.256729	320586	RIKEN cDNA A630089N07 gene	non_coding									zf-C2H2
A730017L22Rik	70.4021	53.5438	87.2603	1.63338	0.707863	0.0260873	0.303292	Up	1.0392	0.989161	1.08092	0.666286	0.741053	0.504584	613258	RIKEN cDNA A730017L22 gene	non_coding			GO:0003674,GO:0005575,GO:0008150	molecular_function|cellular_component|biological_process
A730020E08Rik	35.0666	40.0433	30.09	0.75034	-0.414383	0.326994	0.842096	Down	0.587026	0.483861	0.45999	0.50612	0.652064	0.925383	100504262	RIKEN cDNA A730020E08 gene	non_coding			GO:0003674,GO:0005575,GO:0008150	molecular_function|cellular_component|biological_process
A730020M07Rik	5.75149	4.26319	7.23978	1.7012	0.766551	0.442072	0.899499	Up	0.0662638	0.0448152	0.110771	0.0179235	0.0588843	0.0566551	100503044	RIKEN cDNA A730020M07 gene	non_coding			GO:0003674,GO:0005575,GO:0008150	molecular_function|cellular_component|biological_process
A730036I17Rik	73.992	76.174	71.81	0.940501	-0.0884982	0.831014	0.983606	Down	0.710057	0.576266	0.480726	0.50416	0.370701	1.06241	329513	RIKEN cDNA A730036I17 gene	non_coding			GO:0003674,GO:0005575,GO:0008150	molecular_function|cellular_component|biological_process
A730049H05Rik	25.4742	21.4095	29.5388	1.37633	0.460831	0.428378	0.891568	Up	0.173963	0.47514	0.456345	0.260611	0.15459	0.400446	74516	RIKEN cDNA A730049H05 gene	non_coding			GO:0003674,GO:0005575,GO:0008150	molecular_function|cellular_component|biological_process
A730056A06Rik	7.85366	10.2995	5.40783	0.525876	-0.927206	0.269086	0.804975	Down	0.030747	0.0727813	0.0513988	0.0665334	0.109291	0.12268	319783	RIKEN cDNA A730056A06 gene	non_coding			GO:0003674,GO:0005575,GO:0008150	molecular_function|cellular_component|biological_process
A730063M14Rik	11.6912	9.28415	14.0982	1.51625	0.600504	0.501126	0.916564	Up	1.01876	1.31537	1.3005	0.0751534	0.905308	1.50452	100504703	RIKEN cDNA A730063M14 gene	non_coding
A730085K08Rik	22.9341	21.9886	23.8796	1.09004	0.124384	0.83385	0.983729	Up	1.13052	1.31073	1.13391	1.31054	1.48301	0.460281	654800	RIKEN cDNA A730085K08 gene	non_coding			GO:0003674,GO:0005575,GO:0008150	molecular_function|cellular_component|biological_process
A730090N16Rik	5.53555	5.97821	5.09288	0.856823	-0.22293	0.840943	0.984818	Down	0.154224	0.0670527	0.0883925	0.0357563	0.254519	0.0753489	319798	RIKEN cDNA A730090N16 gene	non_coding			GO:0003674,GO:0005575,GO:0008150	molecular_function|cellular_component|biological_process
A830035A12Rik	4.58918	3.01062	6.16774	2.04292	1.03064	0.327785	0.842232	Up	0.471885	0.341939	0.338072	0.273512	0.11981	0.172911	442842	RIKEN cDNA A830035A12 gene	non_coding			GO:0003674,GO:0005575,GO:0008150	molecular_function|cellular_component|biological_process
A830035O19Rik	5.95336	6.83621	5.07052	0.738894	-0.436562	0.658972	0.953308	Down	0.0756839	0.0767791	0.0607287	0.0368487	0.0807063	0.181186	100101457	RIKEN cDNA A830035O19 gene	non_coding			GO:0003674,GO:0005575,GO:0008150	molecular_function|cellular_component|biological_process
A830049F12Rik	36.2777	29.4245	43.1309	1.4629	0.548833	0.235524	0.778154	Up	0.727696	0.738227	0.388233	0.515114	0.288931	0.476559	319915	RIKEN cDNA A830049F12 gene	protein_coding			GO:0003674,GO:0005575,GO:0008150	molecular_function|cellular_component|biological_process
A830052D11Rik	3.82051	4.71812	2.92289	0.620833	-0.687724	0.676175	0.956026	Down	0.134824	0	0.0811373	0.153167	0.191695	0	402767	RIKEN cDNA A830052D11 gene	non_coding			GO:0003674,GO:0005575,GO:0008150	molecular_function|cellular_component|biological_process
A830082N09Rik	32.3592	35.7794	28.9389	0.807741	-0.308035	0.475729	0.910452	Down	0.097163	0.118283	0.0974544	0.154534	0.0932497	0.142887	414093	RIKEN cDNA A830082N09 gene	non_coding			GO:0003674,GO:0005575,GO:0008150	molecular_function|cellular_component|biological_process
A930001A20Rik	7.36446	7.44859	7.28033	0.972883	-0.0396617	0.965894	0.996216	Down	0.192728	0.0391034	0.154645	0.125113	0.0856324	0.197737	77127	RIKEN cDNA A930001A20 gene	non_coding			GO:0003674,GO:0005575,GO:0008150	molecular_function|cellular_component|biological_process
A930001C03Rik	14.6987	14.6057	14.7917	1.01068	0.0153254	0.983247	0.997726	Up	0.178786	0.233195	0.640438	0.373058	0.204269	0.480421	319314	RIKEN cDNA A930001C03 gene	non_coding			GO:0003674,GO:0005575,GO:0008150	molecular_function|cellular_component|biological_process
A930004D18Rik	92.5638	79.7839	105.344	1.31862	0.399026	0.139691	0.675019	Up	0.81087	0.831085	0.804917	0.685123	0.490282	0.700435	77940	RIKEN cDNA A930004D18 gene	non_coding			GO:0003674,GO:0005575,GO:0008150	molecular_function|cellular_component|biological_process
A930005H10Rik	55.649	45.1215	66.1764	1.46683	0.552705	0.0952634	0.581383	Up	1.17027	1.42904	1.39114	1.05514	0.808842	0.870867	68161	RIKEN cDNA A930005H10 gene	non_coding			GO:0003674,GO:0005575,GO:0008150	molecular_function|cellular_component|biological_process
A930006K02Rik	18.2335	17.7466	18.7203	1.05219	0.073401	0.917708	0.991257	Up	0.352484	1.23168	0.471389	0.603835	0.31323	1.07154	100503120	RIKEN cDNA A930006K02 gene	non_coding			GO:0003674,GO:0005575,GO:0008150	molecular_function|cellular_component|biological_process
A930007A09Rik	91.1937	99.854	82.5334	0.826403	-0.275083	0.289713	0.817734	Down	0.590391	0.645605	0.522948	0.647068	0.701793	0.806337	432999	RIKEN cDNA A930007A09 gene	protein_coding			GO:0003674,GO:0005575,GO:0008150	molecular_function|cellular_component|biological_process
A930007I19Rik	17.8301	16.152	19.5082	1.20462	0.268582	0.631722	0.946787	Up	0.184111	0.266822	0.263804	0.192084	0.140235	0.269851	77779	RIKEN cDNA A930007I19 gene	non_coding			GO:0003674,GO:0005575,GO:0008150	molecular_function|cellular_component|biological_process
A930012L18Rik	3.14954	3.41882	2.88026	0.847337	-0.238992	0.874366	0.987502	Down	0.0128893	0.0392275	0.0517119	0	0.0801771	0.044081	626275	RIKEN cDNA A930012L18 gene	non_coding			GO:0003674,GO:0005575,GO:0008150	molecular_function|cellular_component|biological_process
A930013F10Rik	19.0857	24.1549	14.0165	0.580923	-0.783581	0.268348	0.804363	Down	0.0624648	0.342191	0.087713	0.273714	0.255338	0.320442	68074	RIKEN cDNA A930013F10 gene	non_coding			GO:0003674,GO:0005575,GO:0008150	molecular_function|cellular_component|biological_process
A930015D03Rik	449.464	483.562	415.365	0.858802	-0.219603	0.334072	0.845218	Down	19.2203	12.7669	11.8575	17.608	16.4698	17.6396	77810	RIKEN cDNA A930015D03 gene	non_coding			GO:0003674,GO:0005575,GO:0008150	molecular_function|cellular_component|biological_process
A930017K11Rik	97.2253	93.7087	100.742	1.07385	0.102799	0.716945	0.962859	Up	1.10685	1.0041	0.864652	1.07089	0.728231	1.00095	100034748	RIKEN cDNA A930017K11 gene	protein_coding			GO:0003674,GO:0005575,GO:0008150	molecular_function|cellular_component|biological_process
A930018P22Rik	2.37993	2.95865	1.80122	0.606754	-0.720818	0.623309	0.945462	Down	0.0372043	0.113228	0.0373159	0.0603796	0.066122	0.190856	68243	RIKEN cDNA A930018P22 gene	protein_coding			GO:0003674,GO:0008150	molecular_function|biological_process
A930024E05Rik	8.8636	7.14958	10.5776	1.47271	0.558472	0.555342	0.931125	Up	0.289275	0.130427	0.0483571	0.15649	0.0428433	0.123664	109202	RIKEN cDNA A930024E05 gene	non_coding			GO:0003674,GO:0005575,GO:0008150	molecular_function|cellular_component|biological_process
A930033H14Rik	17.5184	17.7111	17.3256	0.977434	-0.0329293	0.960001	0.995359	Down	0.123154	0.239461	0.133817	0.0749509	0.173278	0.272014	320700	RIKEN cDNA A930033H14 gene	protein_coding			GO:0003674,GO:0005575,GO:0008150	molecular_function|cellular_component|biological_process
A930037H05Rik	6.55333	5.16706	7.93959	1.5396	0.622556	0.474457	0.910452	Up	0.052535	0.0959315	0.0843082	0.0426301	0.0560213	0.0539005	78439	RIKEN cDNA A930037H05 gene	non_coding			GO:0003674,GO:0005575,GO:0008150	molecular_function|cellular_component|biological_process
A930038B10Rik	9.88437	10.0426	9.7261	0.970281	-0.0435254	0.959412	0.995359	Down	0.0209178	0.0424411	0.125883	0.067896	0.0681571	0.0596153	320323	RIKEN cDNA A930038B10 gene	non_coding			GO:0003674,GO:0005575,GO:0008150	molecular_function|cellular_component|biological_process
A930041C12Rik	1.59447	0.326136	2.8628	8.79191	3.13618	0.210664	0.759753	Up	0	0.40294	0.0569119	0	0.0504226	0	78443	RIKEN cDNA A930041C12 gene	non_coding			GO:0003674,GO:0005575,GO:0008150	molecular_function|cellular_component|biological_process
AA386476	34.1812	29.7183	38.6441	1.29848	0.376826	0.412443	0.885929	Up	0.105997	0.176658	0.1253	0.135162	0.0672803	0.113283	546058	expressed sequence AA386476	non_coding			GO:0003674,GO:0005575,GO:0008150	molecular_function|cellular_component|biological_process
AA414768	715.351	721.963	708.739	0.98189	-0.0263665	0.873871	0.987502	Down	12.1407	10.631	13.1476	10.7257	13.4655	12.8152	245350	expressed sequence AA414768	protein_coding	mmu04120	Ubiquitin mediated proteolysis
AA465934	4.01808	2.63251	5.40365	2.03361	1.02404	0.406297	0.883987	Up	0.239296	0.728276	0.240013	0.129453	0.0708821	0.409192	613254	expressed sequence AA465934	non_coding			GO:0003674,GO:0005575,GO:0008150	molecular_function|cellular_component|biological_process
AA467197	479.218	509.115	449.32	0.882966	-0.17957	0.413695	0.886269	Down	14.5686	20.8651	24.1628	20.2826	25.5962	22.022	433470	expressed sequence AA467197	protein_coding			GO:0005634,GO:0005739,GO:0005751,GO:0009617	nucleus|mitochondrion|mitochondrial respiratory chain complex IV|response to bacterium
AA543186	11.3518	10.359	12.3446	1.19268	0.254209	0.710978	0.961661	Up	0.26949	0.18226	0.162179	0.131208	0.207547	0.184329	100272219	expressed sequence AA543186	non_coding
AA986860	1253.53	1334.6	1172.47	0.878656	-0.18663	0.559509	0.932974	Down	8.74621	7.96956	17.4188	12.1885	17.0709	9.60042	212439	expressed sequence AA986860	protein_coding			GO:0003674,GO:0005737,GO:0005829,GO:0005886,GO:0008150	molecular_function|cytoplasm|cytosol|plasma membrane|biological_process
AAdacl4fm3	26.2521	22.5673	29.937	1.32356	0.404418	0.533536	0.927337	Up	0.448093	1.06826	0.359549	0.636317	0.179186	0.612986	546849	AADACL4 family member 3	protein_coding			GO:0005575	cellular_component
AB010352	213.889	253.113	174.665	0.689718	-0.535921	0.0137327	0.218451	Down	0.540559	0.512225	0.387272	0.723037	0.622883	0.766904	105246961	cDNA sequence AB010352	protein_coding	mmu05168	Herpes simplex virus 1 infection	GO:0003674,GO:0005575,GO:0008150	molecular_function|cellular_component|biological_process
AB124611	46.0312	49.4059	42.6565	0.86272	-0.213036	0.550118	0.930151	Down	0.50605	0.637827	0.676756	0.734173	0.585963	0.812893	382062	cDNA sequence AB124611	protein_coding			GO:0003674,GO:0005575,GO:0008150,GO:0016020	molecular_function|cellular_component|biological_process|membrane
AI182371	10.1562	12.7346	7.57782	0.595832	-0.747023	0.302795	0.82722	Down	0.0514701	0.10443	0.0619494	0.125298	0.118919	0.123218	98870	expressed sequence AI182371	protein_coding			GO:0003674,GO:0005575,GO:0008150	molecular_function|cellular_component|biological_process
AI225912	15.0123	17.6585	12.3662	0.698227	-0.518231	0.462615	0.907844	Down	0.07138	0.0181032	0.0626448	0.0832629	0.047573	0.091544	102015	expressed sequence AI225912	non_coding
AI314278	38.0741	23.3346	52.8136	2.27089	1.18326	0.012606	0.207034	Up	0.539298	0.508023	0.837131	0.166712	0.399365	0.274462	101521	expressed sequence AI314278	non_coding			GO:0003674,GO:0005575,GO:0008150	molecular_function|cellular_component|biological_process
AI429214	187.199	194.238	180.159	0.927014	-0.109337	0.598417	0.939316	Down	2.44198	2.93491	2.4181	2.90294	2.41882	3.17836	621080	expressed sequence AI429214	protein_coding			GO:0003674,GO:0005575,GO:0008150	molecular_function|cellular_component|biological_process
AI450353	8.01975	8.50012	7.53937	0.884208	-0.177542	0.865155	0.98672	Down	0.0203135	0.226683	0.18337	0.131869	0.0541539	0.312623	103729	expressed sequence AI450353	non_coding			GO:0003674,GO:0005575,GO:0008150	molecular_function|cellular_component|biological_process
AI467606	316.083	343.048	289.119	0.843289	-0.2459	0.314973	0.835106	Down	2.96393	3.83581	4.3481	3.23679	5.4277	4.68934	101602	expressed sequence AI467606	protein_coding			GO:0003674,GO:0005575,GO:0008150,GO:0016020	molecular_function|cellular_component|biological_process|membrane
AI504432	20.0176	12.9764	27.0587	2.08434	1.05959	0.0523579	0.437409	Up	0.0879374	0.167269	0.159865	0.0668979	0.0586081	0.0751859	229694	expressed sequence AI504432	non_coding			GO:0003674,GO:0005575,GO:0008150	molecular_function|cellular_component|biological_process
AI506816	214.066	247.525	180.607	0.729993	-0.454046	0.0484005	0.419251	Down	1.44679	2.30167	1.76994	2.70379	2.43498	2.45525	433855	expressed sequence AI506816	non_coding			GO:0009611	response to wounding
AI597479	1235.01	1262.67	1207.34	0.955929	-0.0650239	0.67437	0.956026	Down	10.2684	10.3455	8.94661	10.4352	8.67841	12.2535	98404	expressed sequence AI597479	protein_coding			GO:0003674,GO:0005634,GO:0005654,GO:0008150,GO:0048598,GO:0072669	molecular_function|nucleus|nucleoplasm|biological_process|embryonic morphogenesis|tRNA-splicing ligase complex
AI661453	4297.46	3960.53	4634.39	1.17006	0.226585	0.100836	0.596164	Up	28.5326	24.6393	24.6947	22.8976	19.7804	24.7524	224833	expressed sequence AI661453	protein_coding			GO:0003674,GO:0005575,GO:0008150	molecular_function|cellular_component|biological_process
AI662270	158.666	148.459	168.874	1.13591	0.183848	0.538864	0.927616	Up	3.05136	3.97368	3.14733	2.65167	2.01923	4.47767	100043636	expressed sequence AI662270	non_coding			GO:0003674,GO:0005575,GO:0008150	molecular_function|cellular_component|biological_process
AI837181	686.788	657.818	715.757	1.08824	0.121991	0.348458	0.850845	Up	13.0672	12.9763	13.1459	11.3871	12.2775	12.7395	107242	expressed sequence AI837181	protein_coding			GO:0003674,GO:0005575,GO:0008150	molecular_function|cellular_component|biological_process
AI839979	12.3509	10.9864	13.7155	1.25174	0.323939	0.632789	0.946787	Up	0.207811	0.316228	0.468978	0.210788	0.323169	0.266516	100740	expressed sequence AI839979	non_coding			GO:0003674,GO:0005575,GO:0008150	molecular_function|cellular_component|biological_process
AI854703	30.3416	18.8117	41.8714	2.21852	1.1496	0.0197041	0.262251	Up	0.204975	0.335905	0.37955	0.153535	0.0840682	0.181993	243373	expressed sequence AI854703	protein_coding			GO:0000978,GO:0003700,GO:0006357	RNA polymerase II cis-regulatory region sequence-specific DNA binding|DNA-binding transcription factor activity|regulation of transcription by RNA polymerase II
AI987944	310.809	313.166	308.451	0.98436	-0.0227424	0.903729	0.990554	Down	2.29261	2.39822	2.10853	2.50409	1.90335	2.57738	233168	expressed sequence AI987944	protein_coding	mmu05168	Herpes simplex virus 1 infection	GO:0000122,GO:0000977,GO:0001227	negative regulation of transcription by RNA polymerase II|RNA polymerase II transcription regulatory region sequence-specific DNA binding|DNA-binding transcription repressor activity, RNA polymerase II-specific					zf-C2H2
ATP6	1212.73	1062.34	1363.12	1.28312	0.359657	0.116514	0.628401	Up	71.2764	58.0551	39.7168	48.5795	42.4245	41.9279	17705		protein_coding	mmu00190,mmu04714,mmu05208,mmu05010,mmu05012,mmu05014,mmu05016,mmu05020,mmu05022,mmu05415	Oxidative phosphorylation|Thermogenesis|Chemical carcinogenesis - reactive oxygen species|Alzheimer disease|Parkinson disease|Amyotrophic lateral sclerosis|Huntington disease|Prion disease|Pathways of neurodegeneration - multiple diseases|Diabetic cardiomyopathy	GO:0005739,GO:0005753,GO:0015986,GO:0042776,GO:0046933	mitochondrion|mitochondrial proton-transporting ATP synthase complex|proton motive force-driven ATP synthesis|proton motive force-driven mitochondrial ATP synthesis|proton-transporting ATP synthase activity, rotational mechanism	WP295,WP1248	Electron transport chain|Oxidative phosphorylation	R-MMU-1428517,R-MMU-1430728,R-MMU-1592230,R-MMU-163200,R-MMU-163210,R-MMU-1852241,R-MMU-8949613	The citric acid (TCA) cycle and respiratory electron transport|Metabolism|Mitochondrial biogenesis|Respiratory electron transport, ATP synthesis by chemiosmotic coupling, and heat production by uncoupling proteins.|Formation of ATP by chemiosmotic coupling|Organelle biogenesis and maintenance|Cristae formation
ATP8	45.5114	32.8803	58.1426	1.7676	0.821795	0.10404	0.601651	Up	6.87076	13.3343	4.04493	5.81776	3.45098	4.46969	17706		protein_coding	mmu00190,mmu04714,mmu05208,mmu05010,mmu05012,mmu05014,mmu05016,mmu05020,mmu05022,mmu05415	Oxidative phosphorylation|Thermogenesis|Chemical carcinogenesis - reactive oxygen species|Alzheimer disease|Parkinson disease|Amyotrophic lateral sclerosis|Huntington disease|Prion disease|Pathways of neurodegeneration - multiple diseases|Diabetic cardiomyopathy	GO:0000276,GO:0005739,GO:0005753,GO:0006754,GO:0006811,GO:0015078,GO:0015986,GO:0016020,GO:0042776,GO:0045263,GO:0046933,GO:1902600	mitochondrial proton-transporting ATP synthase complex, coupling factor F(o)|mitochondrion|mitochondrial proton-transporting ATP synthase complex|ATP biosynthetic process|monoatomic ion transport|proton transmembrane transporter activity|proton motive force-driven ATP synthesis|membrane|proton motive force-driven mitochondrial ATP synthesis|proton-transporting ATP synthase complex, coupling facto…	WP295,WP1248	Electron transport chain|Oxidative phosphorylation	R-MMU-1428517,R-MMU-1430728,R-MMU-1592230,R-MMU-163200,R-MMU-163210,R-MMU-1852241,R-MMU-8949613	The citric acid (TCA) cycle and respiratory electron transport|Metabolism|Mitochondrial biogenesis|Respiratory electron transport, ATP synthesis by chemiosmotic coupling, and heat production by uncoupling proteins.|Formation of ATP by chemiosmotic coupling|Organelle biogenesis and maintenance|Cristae formation
AU015791	89.0173	87.1391	90.8955	1.0437	0.0617118	0.898462	0.989589	Up	1.84763	4.25705	1.85318	3.98962	2.11495	1.41907	104932	expressed sequence AU015791	non_coding			GO:0003674,GO:0005575,GO:0008150	molecular_function|cellular_component|biological_process
AU015836	9596.12	9508.1	9684.14	1.01848	0.0264159	0.893267	0.989286	Up	102.065	98.6379	72.3701	91.1793	69.2448	112.318	385493	expressed sequence AU015836	non_coding			GO:0005758,GO:0015035,GO:0022417,GO:0045041	mitochondrial intermembrane space|protein-disulfide reductase activity|protein maturation by protein folding|protein import into mitochondrial intermembrane space
AU018091	2617.95	2075.82	3160.07	1.52214	0.606102	0.02579	0.302249	Up	30.1523	28.4645	18.8651	20.0944	10.2608	21.4141	245128	expressed sequence AU018091	protein_coding			GO:0000064,GO:0005886,GO:0015189,GO:0097638,GO:1903352	L-ornithine transmembrane transporter activity|plasma membrane|L-lysine transmembrane transporter activity|L-arginine import across plasma membrane|L-ornithine transmembrane transport
AU020206	190.248	195.84	184.657	0.943965	-0.0831943	0.757206	0.968809	Down	3.1536	4.83195	3.20669	3.58263	4.85105	3.45871	108167440	expressed sequence AU020206	non_coding			GO:0003674,GO:0005575,GO:0008150	molecular_function|cellular_component|biological_process
AU021063	2.12745	2.44041	1.81449	0.744227	-0.426186	0.799118	0.97746	Down	0.104529	0.0530211	0.104843	0	0.185777	0.178744	105968	expressed sequence AU021063	non_coding			GO:0003674,GO:0005575,GO:0008150	molecular_function|cellular_component|biological_process
AU021092	366.908	357.321	376.496	1.05296	0.0744562	0.714806	0.9625	Up	6.99607	8.77121	7.28185	7.39086	5.66954	9.14168	239691	expressed sequence AU021092	protein_coding			GO:0003674,GO:0005576,GO:0005829,GO:0008150,GO:0016020,GO:0042803	molecular_function|extracellular region|cytosol|biological_process|membrane|protein homodimerization activity
AU022252	483.712	478.93	488.495	1.0196	0.0279998	0.876444	0.987544	Up	2.52224	2.5859	2.15919	2.00759	2.25562	2.98521	230696	expressed sequence AU022252	protein_coding			GO:0003674,GO:0005575,GO:0008150,GO:0042802	molecular_function|cellular_component|biological_process|identical protein binding
AU022754	20.2602	20.9297	19.5907	0.935828	-0.0956845	0.87984	0.988273	Down	0.245728	0.249284	0.0616163	0.216015	0.191067	0.192588	105975	expressed sequence AU022754	non_coding			GO:0003674,GO:0005575,GO:0008150	molecular_function|cellular_component|biological_process
AU022793	3.50664	1.58099	5.43229	3.49282	1.80439	0.182803	0.727984	Up	0.0815587	0.0661912	0.0981639	0.0264727	0.0434855	0	105976	expressed sequence AU022793	non_coding			GO:0003674,GO:0005575,GO:0008150	molecular_function|cellular_component|biological_process
AU040320	2428.09	2341.07	2515.12	1.07423	0.103308	0.469831	0.90887	Up	14.4304	12.646	11.6569	11.3899	11.2549	13.9513	100317	expressed sequence AU040320	protein_coding			GO:0001675,GO:0001764,GO:0003674,GO:0005730,GO:0005794,GO:0005802,GO:0005886,GO:0007283,GO:0010996,GO:0016020,GO:0019065,GO:0030317,GO:0031410,GO:0120211	acrosome assembly|neuron migration|molecular_function|nucleolus|Golgi apparatus|trans-Golgi network|plasma membrane|spermatogenesis|response to auditory stimulus|membrane|receptor-mediated endocytosis of virus by host cell|flagellated sperm motility|cytoplasmic vesicle|proacrosomal vesicle fusion
AU041133	184.49	191.639	177.34	0.925543	-0.111629	0.614687	0.943881	Down	1.02258	1.17103	0.899799	1.24722	1.04807	1.06739	216177	expressed sequence AU041133	protein_coding	mmu05168	Herpes simplex virus 1 infection	GO:0000122,GO:0000977,GO:0001227	negative regulation of transcription by RNA polymerase II|RNA polymerase II transcription regulatory region sequence-specific DNA binding|DNA-binding transcription repressor activity, RNA polymerase II-specific					zf-C2H2
AV039307	4.94772	3.7857	6.10974	1.60181	0.679706	0.572861	0.934705	Up	0.0457512	0.255273	0.0917769	0.055688	0.020328	0.176026	100502700	expressed sequence AV039307	non_coding			GO:0003674,GO:0005575,GO:0008150	molecular_function|cellular_component|biological_process
AV051173	10.2627	11.4934	9.03191	0.782418	-0.353988	0.661906	0.953936	Down	0.291582	0.345102	0.584913	0.473215	0.215925	0.914102	100502959	expressed sequence AV051173	non_coding
AV099323	14.3009	17.4265	11.1754	0.641077	-0.641431	0.332872	0.845176	Down	0.0568476	0.134564	0.104533	0.199895	0.101033	0.162014	102633666	expressed sequence AV099323	non_coding			GO:0003674,GO:0005575,GO:0008150	molecular_function|cellular_component|biological_process
AW011738	118.146	87.8141	148.477	1.68906	0.756217	0.0213776	0.272893	Up	1.60954	1.66662	1.30263	1.25204	0.581982	0.892123	100382	expressed sequence AW011738	non_coding			GO:0003674,GO:0005575,GO:0008150	molecular_function|cellular_component|biological_process
AW046200	6.39108	5.19943	7.58273	1.46269	0.548627	0.588947	0.93746	Up	0.122044	0.24762	0.061205	0.0330113	0.144603	0.121738	100502619	expressed sequence AW046200	non_coding			GO:0003674,GO:0005575,GO:0008150	molecular_function|cellular_component|biological_process
AW047730	4.97258	5.61219	4.33298	0.777231	-0.363585	0.734959	0.966372	Down	0.0501431	0.0847813	0.0670581	0.0949414	0.133677	0.0285813	99870	expressed sequence AW047730	non_coding			GO:0003674,GO:0005575,GO:0008150	molecular_function|cellular_component|biological_process
AW112010	77.7938	83.0453	72.5423	0.873348	-0.195372	0.636135	0.947168	Down	1.57266	2.23359	4.14062	2.23327	2.86492	4.1683	107350	expressed sequence AW112010	non_coding			GO:0003674,GO:0005575,GO:0008150	molecular_function|cellular_component|biological_process
AW121686	2.45577	3.09496	1.81658	0.58845	-0.765009	0.632911	0.946787	Down	0.019501	0	0.0293392	0.0395607	0.0346585	0.00833661	106026	expressed sequence AW121686	non_coding			GO:0003674,GO:0005575,GO:0008150	molecular_function|cellular_component|biological_process
AW146154	118.334	119.041	117.628	0.987456	-0.0182123	0.949259	0.994876	Down	0.973692	1.12372	0.824297	1.21779	0.746184	1.0158	101835	expressed sequence AW146154	protein_coding	mmu05168	Herpes simplex virus 1 infection							zf-C2H2
AW209491	484.205	460.489	507.92	1.10371	0.142356	0.429721	0.892259	Up	6.62726	7.82332	6.82842	6.47775	7.14735	5.74352	105351	expressed sequence AW209491	protein_coding			GO:0003674,GO:0005575,GO:0008150	molecular_function|cellular_component|biological_process
AW551984	79.4471	60.164	98.7302	1.64246	0.715856	0.161193	0.705098	Up	0.318062	0.903461	0.377019	0.492726	0.292918	0.173053	244810	expressed sequence AW551984	protein_coding			GO:0003674,GO:0005654,GO:0055007,GO:0060923	molecular_function|nucleoplasm|cardiac muscle cell differentiation|cardiac muscle cell fate commitment
AW554918	190.891	200.121	181.662	0.907476	-0.140069	0.533395	0.927337	Down	0.322446	0.272867	0.221026	0.28006	0.298055	0.333874	225289	expressed sequence AW554918	protein_coding			GO:0003674,GO:0005575,GO:0008150	molecular_function|cellular_component|biological_process
AW822252	158.663	142.663	174.663	1.22282	0.290215	0.268487	0.804363	Up	3.91802	4.46083	5.31508	3.27081	2.98072	5.15736	331578	expressed sequence AW822252	non_coding			GO:0003674,GO:0005575,GO:0008150	molecular_function|cellular_component|biological_process
AY036118	2.27028	2.37339	2.16717	0.91016	-0.135807	0.936716	0.993203	Down	0.0216255	0	0.108452	0.0175482	0.0384343	0.0924482	101056014	cDNA sequence AY036118	non_coding			GO:0008284,GO:0030097	positive regulation of cell population proliferation|hemopoiesis
AY358078	4.77474	4.51251	5.03697	1.11641	0.158869	0.904063	0.990554	Up	0.0417116	0.169261	0.0836734	0	0.111199	0.160484	278676	cDNA sequence AY358078	protein_coding			GO:0003674,GO:0005575,GO:0008150	molecular_function|cellular_component|biological_process
Aaas	464.127	504.51	423.743	0.839739	-0.251987	0.164971	0.708241	Down	6.62763	5.48096	7.6236	7.48844	7.4402	8.89437	223921	achalasia%2C adrenocortical insufficiency%2C alacrimia	protein_coding	mmu03013	Nucleocytoplasmic transport	GO:0000922,GO:0001578,GO:0003674,GO:0005634,GO:0005635,GO:0005643,GO:0005654,GO:0005737,GO:0005813,GO:0005829,GO:0005856,GO:0006913,GO:0007612,GO:0009566,GO:0015031,GO:0031965,GO:0051028,GO:0072686,GO:0090307	spindle pole|microtubule bundle formation|molecular_function|nucleus|nuclear envelope|nuclear pore|nucleoplasm|cytoplasm|centrosome|cytosol|cytoskeleton|nucleocytoplasmic transport|learning|fertilization|protein transport|nuclear membrane|mRNA transport|mitotic spindle|mitotic spindle assembly			R-MMU-1430728,R-MMU-159227,R-MMU-159230,R-MMU-159231,R-MMU-159234,R-MMU-159236,R-MMU-162582,R-MMU-1640170,R-MMU-170822,R-MMU-191859,R-MMU-194315,R-MMU-194441,R-MMU-211000,R-MMU-2262752,R-MMU-2980766,R-MMU-2990846,R-MMU-3108214,R-MMU-3108232,R-MMU-3232142,R-MMU-3301854,R-MMU-3371453,R-MMU-3371556,R-MMU-392499,R-MMU-4085377,R-MMU-4551638,R-MMU-4570464,R-MMU-4615885,R-MMU-5578749,R-MMU-597592,R-MMU-…	Metabolism|Transport of the SLBP independent Mature mRNA|Transport of the SLBP Dependant Mature mRNA|Transport of Mature mRNA Derived from an Intronless Transcript|Transport of Mature mRNAs Derived from Intronless Transcripts|Transport of Mature mRNA derived from an Intron-Containing Transcript|Signal Transduction|Cell Cycle|Regulation of Glucokinase by Glucokinase Regulatory Protein|snRNP Assemb…
Aacs	1459.67	1414.48	1504.86	1.06374	0.0891522	0.519468	0.922674	Up	14.3474	13.231	12.5135	13.1921	11.3595	13.5716	78894	acetoacetyl-CoA synthetase	protein_coding	mmu00650,mmu00280	Butanoate metabolism|Valine, leucine and isoleucine degradation	GO:0000166,GO:0001889,GO:0005524,GO:0005737,GO:0006629,GO:0006631,GO:0007584,GO:0009410,GO:0010243,GO:0014070,GO:0016874,GO:0030729,GO:0032024,GO:0034201,GO:0045471,GO:0047760,GO:0071333	nucleotide binding|liver development|ATP binding|cytoplasm|lipid metabolic process|fatty acid metabolic process|response to nutrient|response to xenobiotic stimulus|response to organonitrogen compound|response to organic cyclic compound|ligase activity|acetoacetate-CoA ligase activity|positive regulation of insulin secretion|response to oleic acid|response to ethanol|butyrate-CoA ligase activity|…			R-MMU-1430728,R-MMU-556833,R-MMU-74182,R-MMU-77111	Metabolism|Metabolism of lipids|Ketone body metabolism|Synthesis of Ketone Bodies
Aadacl2	2.14553	0	4.29106	25.6506	4.68092	0.126391	0.648419	Up	0	0.233293	0	0	0	0	639634	arylacetamide deacetylase like 2	protein_coding			GO:0005575	cellular_component
Aadacl2fm1	3.2183	0	6.43659	38.4727	5.26576	0.0585514	0.463272	Up	0	0.199499	0	0	0	0	229333	AADACL2 family member 1	protein_coding			GO:0005575	cellular_component
Aadacl4fm5	4.05168	2.70181	5.40156	1.99574	0.99692	0.435172	0.895615	Up	0.0638345	0.215861	0.0426839	0.103598	0.0189085	0.0363853	329993	AADACL4 family member 5	protein_coding			GO:0005575	cellular_component
Aadat	2.45526	0.585256	4.32526	7.28858	2.86564	0.169801	0.715234	Up	0.014312	0	0.157905	0.0116137	0	0.0122367	23923	aminoadipate aminotransferase	protein_coding	mmu00310,mmu00380	Lysine degradation|Tryptophan metabolism	GO:0003824,GO:0005739,GO:0006103,GO:0006536,GO:0008483,GO:0009058,GO:0016212,GO:0016740,GO:0030170,GO:0042803,GO:0047315,GO:0047536,GO:0047958,GO:0050094,GO:0070189,GO:1901605	catalytic activity|mitochondrion|2-oxoglutarate metabolic process|glutamate metabolic process|transaminase activity|biosynthetic process|kynurenine-oxoglutarate transaminase activity|transferase activity|pyridoxal phosphate binding|protein homodimerization activity|kynurenine-glyoxylate transaminase activity|2-aminoadipate transaminase activity|glycine:2-oxoglutarate aminotransferase activity|met…	WP79	Tryptophan metabolism	R-MMU-1430728,R-MMU-71064,R-MMU-71240,R-MMU-71291	Metabolism|Lysine catabolism|Tryptophan catabolism|Metabolism of amino acids and derivatives
Aagab	1171.98	1182.14	1161.82	0.982873	-0.0249232	0.851116	0.98672	Down	5.7842	6.32197	6.42889	5.48989	6.49133	7.11398	66939	alpha- and gamma-adaptin binding protein	protein_coding			GO:0003674,GO:0005737,GO:0005829,GO:0008150,GO:0015031,GO:0016607	molecular_function|cytoplasm|cytosol|biological_process|protein transport|nuclear speck
Aak1	2883.33	2801.75	2964.91	1.05811	0.0814872	0.547307	0.92901	Up	5.80062	5.08689	5.16635	4.97929	4.53739	5.87865	269774	AP2 associated kinase 1	protein_coding			GO:0000166,GO:0004672,GO:0004674,GO:0005112,GO:0005524,GO:0005829,GO:0005886,GO:0005905,GO:0006468,GO:0006897,GO:0016020,GO:0016301,GO:0016310,GO:0016740,GO:0031252,GO:0032880,GO:0035612,GO:0042995,GO:0043195,GO:0043231,GO:0044305,GO:0045202,GO:0045747,GO:0050821,GO:0071439,GO:0098793,GO:0140238,GO:2000369	nucleotide binding|protein kinase activity|protein serine/threonine kinase activity|Notch binding|ATP binding|cytosol|plasma membrane|clathrin-coated pit|protein phosphorylation|endocytosis|membrane|kinase activity|phosphorylation|transferase activity|cell leading edge|regulation of protein localization|AP-2 adaptor complex binding|cell projection|terminal bouton|intracellular membrane-bounded or…			R-MMU-199991,R-MMU-5653656,R-MMU-8856825,R-MMU-8856828	Membrane Trafficking|Vesicle-mediated transport|Cargo recognition for clathrin-mediated endocytosis|Clathrin-mediated endocytosis
Aamdc	587.896	584.866	590.926	1.01031	0.0147951	0.915571	0.991257	Up	15.936	17.5267	16.595	14.9095	16.3816	18.8876	66273	adipogenesis associated Mth938 domain containing	protein_coding			GO:0003674,GO:0005737,GO:0006366,GO:0043066,GO:0045600,GO:0045944	molecular_function|cytoplasm|transcription by RNA polymerase II|negative regulation of apoptotic process|positive regulation of fat cell differentiation|positive regulation of transcription by RNA polymerase II
Aamp	7116.97	6916.18	7317.75	1.05802	0.0813655	0.465973	0.907844	Up	80.2163	83.8967	87.1864	75.4598	73.2373	92.0162	227290	angio-associated migratory protein	protein_coding			GO:0005829,GO:0008201,GO:0009986,GO:0015630,GO:0045171	cytosol|heparin binding|cell surface|microtubule cytoskeleton|intercellular bridge			R-MMU-109582,R-MMU-162582,R-MMU-168249,R-MMU-168256,R-MMU-168638,R-MMU-168643,R-MMU-177929,R-MMU-392518,R-MMU-428930,R-MMU-76002,R-MMU-9006934	Hemostasis|Signal Transduction|Innate Immune System|Immune System|NOD1/2 Signaling Pathway|Nucleotide-binding domain, leucine rich repeat containing receptor (NLR) signaling pathways|Signaling by EGFR|Signal amplification|Thromboxane signalling through TP receptor|Platelet activation, signaling and aggregation|Signaling by Receptor Tyrosine Kinases
Aanat	2.4242	3.04299	1.8054	0.594556	-0.750115	0.600112	0.940298	Down	0.00980068	0.00994251	0.0294902	0.0159057	0.0348369	0.033518	11298	arylalkylamine N-acetyltransferase	protein_coding	mmu00380	Tryptophan metabolism	GO:0004059,GO:0004060,GO:0005737,GO:0005829,GO:0006474,GO:0007623,GO:0009416,GO:0009648,GO:0010043,GO:0014070,GO:0016740,GO:0016746,GO:0016747,GO:0030187,GO:0032868,GO:0034695,GO:0046688,GO:0048471,GO:0048511,GO:0071320,GO:0071889	aralkylamine N-acetyltransferase activity|arylamine N-acetyltransferase activity|cytoplasm|cytosol|N-terminal protein amino acid acetylation|circadian rhythm|response to light stimulus|photoperiodism|response to zinc ion|response to organic cyclic compound|transferase activity|acyltransferase activity|acyltransferase activity, transferring groups other than amino-acyl groups|melatonin biosyntheti…	WP522,WP79	Biogenic amine synthesis|Tryptophan metabolism	R-MMU-1430728,R-MMU-209776,R-MMU-209931,R-MMU-71291	Metabolism|Metabolism of amine-derived hormones|Serotonin and melatonin biosynthesis|Metabolism of amino acids and derivatives
Aar2	1044.67	1013.95	1075.39	1.06066	0.0849564	0.635674	0.947126	Up	7.85517	6.98767	10.2744	7.3296	8.1612	8.46345	68295	AAR2 splicing factor homolog	protein_coding			GO:0000244,GO:0003674,GO:0005575,GO:0005681,GO:0006397,GO:0008380	spliceosomal tri-snRNP complex assembly|molecular_function|cellular_component|spliceosomal complex|mRNA processing|RNA splicing
Aard	162.674	140.268	185.081	1.3173	0.397588	0.198854	0.745448	Up	4.11395	4.05882	3.44613	3.06317	1.72746	4.21314	239435	alanine and arginine rich domain containing protein	protein_coding			GO:0003674,GO:0005575,GO:0008150	molecular_function|cellular_component|biological_process
Aars	3070.37	3248.51	2892.22	0.890396	-0.167481	0.155487	0.698401	Down	12.7528	12.5964	13.2293	14.1667	15.083	14.4587	234734	alanyl-tRNA synthetase	protein_coding	mmu00970	Aminoacyl-tRNA biosynthesis	GO:0000049,GO:0000166,GO:0002161,GO:0002196,GO:0003676,GO:0003723,GO:0004812,GO:0004813,GO:0005515,GO:0005524,GO:0005737,GO:0005739,GO:0005829,GO:0006400,GO:0006412,GO:0006419,GO:0016597,GO:0016874,GO:0021680,GO:0043039,GO:0043524,GO:0046872,GO:0050885,GO:0050905,GO:0051402,GO:0140018	tRNA binding|nucleotide binding|aminoacyl-tRNA editing activity|Ser-tRNA(Ala) hydrolase activity|nucleic acid binding|RNA binding|aminoacyl-tRNA ligase activity|alanine-tRNA ligase activity|protein binding|ATP binding|cytoplasm|mitochondrion|cytosol|tRNA modification|translation|alanyl-tRNA aminoacylation|amino acid binding|ligase activity|cerebellar Purkinje cell layer development|tRNA aminoacyl…
Aars2	237.83	248.924	226.735	0.91057	-0.135158	0.458332	0.90593	Down	1.73317	1.53949	1.75439	1.7499	1.77437	2.06913	224805	alanyl-tRNA synthetase 2%2C mitochondrial	protein_coding	mmu00970	Aminoacyl-tRNA biosynthesis	GO:0000049,GO:0000166,GO:0002161,GO:0003676,GO:0003723,GO:0004812,GO:0004813,GO:0005524,GO:0005737,GO:0005739,GO:0006412,GO:0006419,GO:0016874,GO:0043039,GO:0046872,GO:0070143	tRNA binding|nucleotide binding|aminoacyl-tRNA editing activity|nucleic acid binding|RNA binding|aminoacyl-tRNA ligase activity|alanine-tRNA ligase activity|ATP binding|cytoplasm|mitochondrion|translation|alanyl-tRNA aminoacylation|ligase activity|tRNA aminoacylation|metal ion binding|mitochondrial alanyl-tRNA aminoacylation
Aarsd1	290.677	294.254	287.1	0.976499	-0.0343093	0.858675	0.98672	Down	3.94827	4.80649	4.95874	4.54113	5.17132	4.41781	69684	alanyl-tRNA synthetase domain containing 1	protein_coding			GO:0000166,GO:0002161,GO:0002196,GO:0003676,GO:0004812,GO:0004813,GO:0005515,GO:0005524,GO:0005737,GO:0006412,GO:0006419,GO:0006450,GO:0043039,GO:0046872	nucleotide binding|aminoacyl-tRNA editing activity|Ser-tRNA(Ala) hydrolase activity|nucleic acid binding|aminoacyl-tRNA ligase activity|alanine-tRNA ligase activity|protein binding|ATP binding|cytoplasm|translation|alanyl-tRNA aminoacylation|regulation of translational fidelity|tRNA aminoacylation|metal ion binding
Aasdh	244.788	230.495	259.081	1.1229	0.167225	0.4489	0.903077	Up	0.866309	0.937177	0.957336	0.880275	0.606327	1.00616	231326	aminoadipate-semialdehyde dehydrogenase	protein_coding			GO:0000166,GO:0003674,GO:0005524,GO:0005575,GO:0006629,GO:0006631,GO:0016874,GO:0019482,GO:0043041	nucleotide binding|molecular_function|ATP binding|cellular_component|lipid metabolic process|fatty acid metabolic process|ligase activity|beta-alanine metabolic process|amino acid activation for nonribosomal peptide biosynthetic process
Aasdhppt	757.081	755.018	759.144	1.00504	0.00725541	0.960531	0.995359	Up	7.02465	7.11612	7.0558	6.89084	6.09053	8.41188	67618	aminoadipate-semialdehyde dehydrogenase-phosphopantetheinyl transferase	protein_coding	mmu00770	Pantothenate and CoA biosynthesis	GO:0000287,GO:0005737,GO:0005829,GO:0008897,GO:0009258,GO:0016740,GO:0019878,GO:0046872,GO:0051604	magnesium ion binding|cytoplasm|cytosol|holo-[acyl-carrier-protein] synthase activity|10-formyltetrahydrofolate catabolic process|transferase activity|lysine biosynthetic process via aminoadipic acid|metal ion binding|protein maturation			R-MMU-1430728,R-MMU-196849,R-MMU-196854,R-MMU-199220	Metabolism|Metabolism of water-soluble vitamins and cofactors|Metabolism of vitamins and cofactors|Vitamin B5 (pantothenate) metabolism
Aass	222.813	179.795	265.832	1.47988	0.565477	0.0245837	0.295019	Up	2.36287	1.68713	2.01488	1.15577	1.70466	1.28113	30956	aminoadipate-semialdehyde synthase	protein_coding	mmu00310	Lysine degradation	GO:0003824,GO:0004753,GO:0005737,GO:0005739,GO:0006091,GO:0006554,GO:0008152,GO:0016491,GO:0019477,GO:0019878,GO:0043231,GO:0047130,GO:0047131	catalytic activity|saccharopine dehydrogenase activity|cytoplasm|mitochondrion|generation of precursor metabolites and energy|lysine catabolic process|metabolic process|oxidoreductase activity|L-lysine catabolic process|lysine biosynthetic process via aminoadipic acid|intracellular membrane-bounded organelle|saccharopine dehydrogenase (NADP+, L-lysine-forming) activity|saccharopine dehydrogenase …			R-MMU-1430728,R-MMU-71064,R-MMU-71291	Metabolism|Lysine catabolism|Metabolism of amino acids and derivatives
Aatf	647.008	723.409	570.607	0.788563	-0.342701	0.0455522	0.406715	Down	5.56704	7.09261	6.19092	7.27219	6.99338	9.99654	56321	apoptosis antagonizing transcription factor	protein_coding			GO:0005515,GO:0005634,GO:0005654,GO:0005667,GO:0005730,GO:0005737,GO:0005829,GO:0006357,GO:0007155,GO:0007346,GO:0019901,GO:0032040,GO:0032929,GO:0040016,GO:0042254,GO:0042274,GO:0042985,GO:0043066,GO:0043522,GO:0045893,GO:0045944,GO:0048156,GO:2000378,GO:2001234	protein binding|nucleus|nucleoplasm|transcription regulator complex|nucleolus|cytoplasm|cytosol|regulation of transcription by RNA polymerase II|cell adhesion|regulation of mitotic cell cycle|protein kinase binding|small-subunit processome|negative regulation of superoxide anion generation|embryonic cleavage|ribosome biogenesis|ribosomal small subunit biogenesis|negative regulation of amyloid pre…
Aatk	119.111	105.341	132.88	1.26078	0.334317	0.280297	0.810064	Up	0.55036	0.610262	0.415078	0.546993	0.314672	0.393952	11302	apoptosis-associated tyrosine kinase	protein_coding			GO:0000166,GO:0004672,GO:0004674,GO:0004713,GO:0005524,GO:0005737,GO:0006468,GO:0006915,GO:0007420,GO:0016020,GO:0016301,GO:0016310,GO:0016740,GO:0038083,GO:0042995,GO:0051402	nucleotide binding|protein kinase activity|protein serine/threonine kinase activity|protein tyrosine kinase activity|ATP binding|cytoplasm|protein phosphorylation|apoptotic process|brain development|membrane|kinase activity|phosphorylation|transferase activity|peptidyl-tyrosine autophosphorylation|cell projection|neuron apoptotic process
Abat	810.824	815.003	806.645	0.989838	-0.0147355	0.957583	0.995359	Down	4.51534	3.08713	7.10645	4.73069	5.4259	4.84399	268860	4-aminobutyrate aminotransferase	protein_coding	mmu00640,mmu00650,mmu00250,mmu00280,mmu00410,mmu04727	Propanoate metabolism|Butanoate metabolism|Alanine, aspartate and glutamate metabolism|Valine, leucine and isoleucine degradation|beta-Alanine metabolism|GABAergic synapse	GO:0001666,GO:0003824,GO:0003867,GO:0005739,GO:0005759,GO:0007620,GO:0007626,GO:0008483,GO:0009410,GO:0009448,GO:0009449,GO:0009450,GO:0010039,GO:0014053,GO:0016740,GO:0030170,GO:0031652,GO:0032024,GO:0032144,GO:0033602,GO:0034386,GO:0035094,GO:0035640,GO:0042135,GO:0042220,GO:0042802,GO:0045471,GO:0045776,GO:0045964,GO:0046872,GO:0047298,GO:0048148,GO:0051536,GO:0070474,GO:0097151,GO:1902722,GO:…	response to hypoxia|catalytic activity|4-aminobutyrate transaminase activity|mitochondrion|mitochondrial matrix|copulation|locomotory behavior|transaminase activity|response to xenobiotic stimulus|gamma-aminobutyric acid metabolic process|gamma-aminobutyric acid biosynthetic process|gamma-aminobutyric acid catabolic process|response to iron ion|negative regulation of gamma-aminobutyric acid secre…	WP240	Alanine and aspartate metabolism	R-MMU-112310,R-MMU-112315,R-MMU-112316,R-MMU-888590,R-MMU-916853	Neurotransmitter release cycle|Transmission across Chemical Synapses|Neuronal System|GABA synthesis, release, reuptake and degradation|Degradation of GABA
Abca1	11911.1	11711.1	12111.1	1.03413	0.0484185	0.773654	0.971737	Up	37.5943	33.8033	26.7591	31.4117	27.6817	37.2873	11303	ATP-binding cassette%2C sub-family A (ABC1)%2C member 1	protein_coding	mmu02010,mmu04975,mmu04979,mmu05417	ABC transporters|Fat digestion and absorption|Cholesterol metabolism|Lipid and atherosclerosis	GO:0000166,GO:0002790,GO:0005102,GO:0005515,GO:0005524,GO:0005548,GO:0005768,GO:0005794,GO:0005886,GO:0006497,GO:0006911,GO:0007040,GO:0007186,GO:0007189,GO:0008035,GO:0008203,GO:0008320,GO:0009306,GO:0009897,GO:0009986,GO:0010875,GO:0015914,GO:0015918,GO:0016020,GO:0016197,GO:0016323,GO:0016887,GO:0019905,GO:0023061,GO:0030139,GO:0030301,GO:0031210,GO:0031267,GO:0032367,GO:0032489,GO:0033344,GO:…	nucleotide binding|peptide secretion|signaling receptor binding|protein binding|ATP binding|phospholipid transporter activity|endosome|Golgi apparatus|plasma membrane|protein lipidation|phagocytosis, engulfment|lysosome organization|G protein-coupled receptor signaling pathway|adenylate cyclase-activating G protein-coupled receptor signaling pathway|high-density lipoprotein particle binding|chole…	WP431,WP1,WP4346	Nuclear receptors in lipid metabolism and toxicity|Statin pathway|Cholesterol metabolism with Bloch and Kandutsch-Russell pathways	R-MMU-162582,R-MMU-174824,R-MMU-382551,R-MMU-8963896,R-MMU-8963898,R-MMU-9006931,R-MMU-9024446,R-MMU-9029569	Signal Transduction|Plasma lipoprotein assembly, remodeling, and clearance|Transport of small molecules|HDL assembly|Plasma lipoprotein assembly|Signaling by Nuclear Receptors|NR1H2 and NR1H3-mediated signaling|NR1H3 & NR1H2 regulate gene expression linked to cholesterol transport and efflux
Abca12	29.101	9.02588	49.1762	5.41929	2.4381	0.0115518	0.196083	Up	0.0549147	0.419677	0.0330476	0.0237659	0.00650654	0.0657323	74591	ATP-binding cassette%2C sub-family A (ABC1)%2C member 12	protein_coding	mmu02010	ABC transporters	GO:0000139,GO:0000166,GO:0003336,GO:0005102,GO:0005319,GO:0005515,GO:0005524,GO:0005737,GO:0005743,GO:0005794,GO:0005829,GO:0005886,GO:0006672,GO:0006869,GO:0006886,GO:0010875,GO:0016020,GO:0016887,GO:0030216,GO:0031410,GO:0031424,GO:0032379,GO:0032940,GO:0033344,GO:0033700,GO:0034191,GO:0035627,GO:0042626,GO:0043129,GO:0043231,GO:0043589,GO:0045055,GO:0045616,GO:0048286,GO:0051649,GO:0055085,GO:…	Golgi membrane|nucleotide binding|corneocyte desquamation|signaling receptor binding|lipid transporter activity|protein binding|ATP binding|cytoplasm|mitochondrial inner membrane|Golgi apparatus|cytosol|plasma membrane|ceramide metabolic process|lipid transport|intracellular protein transport|positive regulation of cholesterol efflux|membrane|ATP hydrolysis activity|keratinocyte differentiation|c…			R-MMU-1369062,R-MMU-382551,R-MMU-382556	ABC transporters in lipid homeostasis|Transport of small molecules|ABC-family proteins mediated transport
Abca13	45.7474	54.9311	36.5636	0.666905	-0.584447	0.156614	0.699196	Down	0.0623227	0.0650842	0.0588326	0.0624718	0.130311	0.0893315	268379	ATP-binding cassette%2C sub-family A (ABC1)%2C member 13	protein_coding	mmu02010	ABC transporters	GO:0000166,GO:0005319,GO:0005524,GO:0006869,GO:0016020,GO:0016887,GO:0031410,GO:0032376,GO:0035627,GO:0042626,GO:0043231,GO:0055085,GO:0097708,GO:0140359,GO:1900244	nucleotide binding|lipid transporter activity|ATP binding|lipid transport|membrane|ATP hydrolysis activity|cytoplasmic vesicle|positive regulation of cholesterol transport|ceramide transport|ATPase-coupled transmembrane transporter activity|intracellular membrane-bounded organelle|transmembrane transport|intracellular vesicle|ABC-type transporter activity|positive regulation of synaptic vesicle e…			R-MMU-168249,R-MMU-168256,R-MMU-6798695	Innate Immune System|Immune System|Neutrophil degranulation
Abca14	2.49219	3.52048	1.4639	0.417406	-1.26048	0.478694	0.91133	Down	0.0155699	0.00526508	0	0.00421146	0.0415078	0.00443739	67928	ATP-binding cassette%2C sub-family A (ABC1)%2C member 14	protein_coding	mmu02010	ABC transporters	GO:0005319,GO:0006869,GO:0042626,GO:0043231	lipid transporter activity|lipid transport|ATPase-coupled transmembrane transporter activity|intracellular membrane-bounded organelle
Abca16	6.73395	4.8334	8.6345	1.78728	0.837767	0.370584	0.865488	Up	0.0171406	0.0695547	0.0515761	0.0324542	0.020309	0.0244252	233810	ATP-binding cassette%2C sub-family A (ABC1)%2C member 16	protein_coding	mmu02010	ABC transporters	GO:0005319,GO:0006869,GO:0042626,GO:0043231	lipid transporter activity|lipid transport|ATPase-coupled transmembrane transporter activity|intracellular membrane-bounded organelle
Abca17	9.74881	13.6581	5.83951	0.426552	-1.22921	0.160672	0.705019	Down	0.040262	0.0122534	0.0121148	0.0784106	0.039356	0.0344238	381072	ATP-binding cassette%2C sub-family A (ABC1)%2C member 17	protein_coding	mmu02010	ABC transporters	GO:0000166,GO:0005319,GO:0005524,GO:0005737,GO:0005783,GO:0006629,GO:0006638,GO:0006869,GO:0016020,GO:0016887,GO:0042626,GO:0043231,GO:0055085,GO:0140359	nucleotide binding|lipid transporter activity|ATP binding|cytoplasm|endoplasmic reticulum|lipid metabolic process|neutral lipid metabolic process|lipid transport|membrane|ATP hydrolysis activity|ATPase-coupled transmembrane transporter activity|intracellular membrane-bounded organelle|transmembrane transport|ABC-type transporter activity
Abca2	329.233	295.967	362.499	1.22454	0.292239	0.218908	0.769492	Up	0.966071	0.929066	0.915759	0.514311	0.80886	1.01935	11305	ATP-binding cassette%2C sub-family A (ABC1)%2C member 2	protein_coding	mmu02010,mmu04142	ABC transporters|Lysosome	GO:0000166,GO:0001573,GO:0005319,GO:0005524,GO:0005764,GO:0005765,GO:0005768,GO:0005815,GO:0005886,GO:0006684,GO:0006687,GO:0006869,GO:0007626,GO:0008203,GO:0010008,GO:0016020,GO:0016887,GO:0019218,GO:0031410,GO:0032289,GO:0032383,GO:0032384,GO:0032805,GO:0042626,GO:0042986,GO:0043231,GO:0045939,GO:0046512,GO:0055085,GO:0060049,GO:0061135,GO:0071072,GO:0090155,GO:0090156,GO:0090370,GO:0099038,GO:…	nucleotide binding|ganglioside metabolic process|lipid transporter activity|ATP binding|lysosome|lysosomal membrane|endosome|microtubule organizing center|plasma membrane|sphingomyelin metabolic process|glycosphingolipid metabolic process|lipid transport|locomotory behavior|cholesterol metabolic process|endosome membrane|membrane|ATP hydrolysis activity|regulation of steroid metabolic process|cyt…
Abca3	3605.54	3366.34	3844.74	1.14211	0.191703	0.169522	0.715234	Up	18.0237	14.5534	16.8233	14.4639	14.3576	14.9151	27410	ATP-binding cassette%2C sub-family A (ABC1)%2C member 3	protein_coding	mmu02010	ABC transporters	GO:0000166,GO:0005319,GO:0005524,GO:0005764,GO:0005768,GO:0005770,GO:0005886,GO:0006810,GO:0006855,GO:0006869,GO:0008559,GO:0010875,GO:0015914,GO:0016020,GO:0016887,GO:0030324,GO:0030659,GO:0031410,GO:0032368,GO:0032464,GO:0042599,GO:0042626,GO:0042908,GO:0043129,GO:0043231,GO:0046470,GO:0046471,GO:0046618,GO:0046890,GO:0055085,GO:0055091,GO:0070925,GO:0097208,GO:0097232,GO:0097233,GO:0120019,GO:…	nucleotide binding|lipid transporter activity|ATP binding|lysosome|endosome|late endosome|plasma membrane|transport|xenobiotic transmembrane transport|lipid transport|ABC-type xenobiotic transporter activity|positive regulation of cholesterol efflux|phospholipid transport|membrane|ATP hydrolysis activity|lung development|cytoplasmic vesicle membrane|cytoplasmic vesicle|regulation of lipid transpo…			R-MMU-1369062,R-MMU-382551,R-MMU-382556,R-MMU-392499,R-MMU-5683826	ABC transporters in lipid homeostasis|Transport of small molecules|ABC-family proteins mediated transport|Metabolism of proteins|Surfactant metabolism
Abca4	121.239	138.451	104.027	0.7503	-0.414461	0.156606	0.699196	Down	0.343626	0.270408	0.312446	0.463863	0.282527	0.507968	11304	ATP-binding cassette%2C sub-family A (ABC1)%2C member 4	protein_coding	mmu02010	ABC transporters	GO:0000166,GO:0001750,GO:0005502,GO:0005503,GO:0005524,GO:0005548,GO:0005783,GO:0005886,GO:0006649,GO:0006869,GO:0007601,GO:0016020,GO:0016887,GO:0031410,GO:0042574,GO:0042626,GO:0042995,GO:0043231,GO:0045332,GO:0045494,GO:0050896,GO:0055085,GO:0090555,GO:0140326,GO:0140327,GO:0140347,GO:0140359	nucleotide binding|photoreceptor outer segment|11-cis retinal binding|all-trans retinal binding|ATP binding|phospholipid transporter activity|endoplasmic reticulum|plasma membrane|phospholipid transfer to membrane|lipid transport|visual perception|membrane|ATP hydrolysis activity|cytoplasmic vesicle|retinal metabolic process|ATPase-coupled transmembrane transporter activity|cell projection|intrac…			R-MMU-2187338,R-MMU-2453902,R-MMU-382551,R-MMU-382556,R-MMU-9709957	Visual phototransduction|The canonical retinoid cycle in rods (twilight vision)|Transport of small molecules|ABC-family proteins mediated transport|Sensory Perception
Abca5	1264.98	1335.74	1194.21	0.893864	-0.161873	0.34981	0.851911	Down	4.69086	3.83914	3.67376	3.98287	4.24704	5.67414	217265	ATP-binding cassette%2C sub-family A (ABC1)%2C member 5	protein_coding	mmu02010	ABC transporters	GO:0000166,GO:0005319,GO:0005524,GO:0005764,GO:0005768,GO:0005770,GO:0005794,GO:0005886,GO:0006869,GO:0008203,GO:0010745,GO:0010874,GO:0016020,GO:0016887,GO:0033344,GO:0034375,GO:0042626,GO:0042632,GO:0043691,GO:0055085,GO:0140359,GO:1903064	nucleotide binding|lipid transporter activity|ATP binding|lysosome|endosome|late endosome|Golgi apparatus|plasma membrane|lipid transport|cholesterol metabolic process|negative regulation of macrophage derived foam cell differentiation|regulation of cholesterol efflux|membrane|ATP hydrolysis activity|cholesterol efflux|high-density lipoprotein particle remodeling|ATPase-coupled transmembrane tran…			R-MMU-1369062,R-MMU-382551,R-MMU-382556	ABC transporters in lipid homeostasis|Transport of small molecules|ABC-family proteins mediated transport
Abca6	13.4719	8.16264	18.7811	2.30021	1.20176	0.0862954	0.552923	Up	0.0440907	0.0559109	0.092131	0.0417408	0.0195902	0.02199	76184	ATP-binding cassette%2C sub-family A (ABC1)%2C member 6	protein_coding	mmu02010	ABC transporters	GO:0000139,GO:0000166,GO:0005319,GO:0005524,GO:0005654,GO:0005794,GO:0005886,GO:0006869,GO:0016020,GO:0042626,GO:0043231,GO:0140359	Golgi membrane|nucleotide binding|lipid transporter activity|ATP binding|nucleoplasm|Golgi apparatus|plasma membrane|lipid transport|membrane|ATPase-coupled transmembrane transporter activity|intracellular membrane-bounded organelle|ABC-type transporter activity			R-MMU-1369062,R-MMU-382551,R-MMU-382556	ABC transporters in lipid homeostasis|Transport of small molecules|ABC-family proteins mediated transport
Abca7	688.615	692.779	684.45	0.987673	-0.0178942	0.899741	0.989758	Down	2.99262	2.95773	2.6696	2.79265	2.69561	3.35728	27403	ATP-binding cassette%2C sub-family A (ABC1)%2C member 7	protein_coding	mmu02010	ABC transporters	GO:0000166,GO:0001891,GO:0005515,GO:0005524,GO:0005548,GO:0005622,GO:0005737,GO:0005768,GO:0005794,GO:0005886,GO:0006869,GO:0006909,GO:0007613,GO:0008542,GO:0009986,GO:0010875,GO:0016020,GO:0016324,GO:0016887,GO:0018149,GO:0019216,GO:0030054,GO:0032587,GO:0033344,GO:0033700,GO:0034188,GO:0034205,GO:0034380,GO:0034504,GO:0038027,GO:0042626,GO:0042985,GO:0042995,GO:0043231,GO:0043409,GO:0044857,GO:…	nucleotide binding|phagocytic cup|protein binding|ATP binding|phospholipid transporter activity|intracellular anatomical structure|cytoplasm|endosome|Golgi apparatus|plasma membrane|lipid transport|phagocytosis|memory|visual learning|cell surface|positive regulation of cholesterol efflux|membrane|apical plasma membrane|ATP hydrolysis activity|peptide cross-linking|regulation of lipid metabolic pr…			R-MMU-1369062,R-MMU-382551,R-MMU-382556	ABC transporters in lipid homeostasis|Transport of small molecules|ABC-family proteins mediated transport
Abca8a	59.7519	50.5673	68.9366	1.36369	0.447512	0.270898	0.805792	Up	0.223226	0.448195	0.223895	0.271708	0.185968	0.198809	217258	ATP-binding cassette%2C sub-family A (ABC1)%2C member 8a	protein_coding	mmu02010	ABC transporters	GO:0000166,GO:0005319,GO:0005524,GO:0005783,GO:0005886,GO:0006686,GO:0006869,GO:0008559,GO:0010874,GO:0010875,GO:0016020,GO:0016887,GO:0030301,GO:0033344,GO:0042626,GO:0042908,GO:0043231,GO:0055085,GO:0140359	nucleotide binding|lipid transporter activity|ATP binding|endoplasmic reticulum|plasma membrane|sphingomyelin biosynthetic process|lipid transport|ABC-type xenobiotic transporter activity|regulation of cholesterol efflux|positive regulation of cholesterol efflux|membrane|ATP hydrolysis activity|cholesterol transport|cholesterol efflux|ATPase-coupled transmembrane transporter activity|xenobiotic t…
Abca8b	121.468	146.039	96.8962	0.664222	-0.590262	0.270421	0.805792	Down	0.273925	0.281748	0.469358	0.497041	0.875631	0.14963	27404	ATP-binding cassette%2C sub-family A (ABC1)%2C member 8b	protein_coding	mmu02010	ABC transporters	GO:0000166,GO:0005319,GO:0005524,GO:0005743,GO:0005783,GO:0005886,GO:0006686,GO:0006810,GO:0006869,GO:0008559,GO:0010874,GO:0010875,GO:0016020,GO:0016323,GO:0016887,GO:0030301,GO:0033344,GO:0042626,GO:0042908,GO:0043231,GO:0055085,GO:0140359	nucleotide binding|lipid transporter activity|ATP binding|mitochondrial inner membrane|endoplasmic reticulum|plasma membrane|sphingomyelin biosynthetic process|transport|lipid transport|ABC-type xenobiotic transporter activity|regulation of cholesterol efflux|positive regulation of cholesterol efflux|membrane|basolateral plasma membrane|ATP hydrolysis activity|cholesterol transport|cholesterol ef…			R-MMU-382551,R-MMU-382556	Transport of small molecules|ABC-family proteins mediated transport
Abca9	389.106	320.766	457.445	1.42571	0.511676	0.0250063	0.297737	Up	1.76258	2.1599	1.31764	1.37011	1.02467	1.31333	217262	ATP-binding cassette%2C sub-family A (ABC1)%2C member 9	protein_coding	mmu02010	ABC transporters	GO:0000166,GO:0005319,GO:0005524,GO:0005739,GO:0006869,GO:0016020,GO:0016887,GO:0042626,GO:0043231,GO:0055085,GO:0140359	nucleotide binding|lipid transporter activity|ATP binding|mitochondrion|lipid transport|membrane|ATP hydrolysis activity|ATPase-coupled transmembrane transporter activity|intracellular membrane-bounded organelle|transmembrane transport|ABC-type transporter activity			R-MMU-1369062,R-MMU-382551,R-MMU-382556	ABC transporters in lipid homeostasis|Transport of small molecules|ABC-family proteins mediated transport
Abcb10	1730.19	1844.21	1616.16	0.876463	-0.190235	0.1586	0.701844	Down	10.0419	9.69362	10.6007	11.6965	12.0642	11.1164	56199	ATP-binding cassette%2C sub-family B (MDR/TAP)%2C member 10	protein_coding	mmu02010	ABC transporters	GO:0000166,GO:0005515,GO:0005524,GO:0005739,GO:0005743,GO:0006783,GO:0016020,GO:0016887,GO:0031966,GO:0034514,GO:0042802,GO:0042803,GO:0045648,GO:0046985,GO:0048821,GO:0055085,GO:0140359	nucleotide binding|protein binding|ATP binding|mitochondrion|mitochondrial inner membrane|heme biosynthetic process|membrane|ATP hydrolysis activity|mitochondrial membrane|mitochondrial unfolded protein response|identical protein binding|protein homodimerization activity|positive regulation of erythrocyte differentiation|positive regulation of hemoglobin biosynthetic process|erythrocyte developme…
Abcb11	32.2376	46.7641	17.7111	0.379453	-1.39801	0.00240884	0.0746513	Down	0.0676078	0.0791379	0.10954	0.181464	0.281907	0.217877	27413	ATP-binding cassette%2C sub-family B (MDR/TAP)%2C member 11	protein_coding	mmu02010,mmu04976,mmu04979,mmu01522	ABC transporters|Bile secretion|Cholesterol metabolism|Endocrine resistance	GO:0000139,GO:0000166,GO:0005524,GO:0005768,GO:0005886,GO:0006631,GO:0006805,GO:0006855,GO:0006869,GO:0008206,GO:0008559,GO:0009410,GO:0009986,GO:0015125,GO:0015126,GO:0015144,GO:0015432,GO:0015721,GO:0015722,GO:0016020,GO:0016324,GO:0016567,GO:0016887,GO:0031998,GO:0042632,GO:0045177,GO:0046581,GO:0046618,GO:0046691,GO:0055037,GO:0055038,GO:0055085,GO:0055088,GO:0055091,GO:0120189,GO:0140359,GO:…	Golgi membrane|nucleotide binding|ATP binding|endosome|plasma membrane|fatty acid metabolic process|xenobiotic metabolic process|xenobiotic transmembrane transport|lipid transport|bile acid metabolic process|ABC-type xenobiotic transporter activity|response to xenobiotic stimulus|cell surface|bile acid transmembrane transporter activity|canalicular bile acid transmembrane transporter activity|car…	WP431	Nuclear receptors in lipid metabolism and toxicity	R-MMU-1430728,R-MMU-159418,R-MMU-192105,R-MMU-193368,R-MMU-194068,R-MMU-556833,R-MMU-8957322	Metabolism|Recycling of bile acids and salts|Synthesis of bile acids and bile salts|Synthesis of bile acids and bile salts via 7alpha-hydroxycholesterol|Bile acid and bile salt metabolism|Metabolism of lipids|Metabolism of steroids
Abcb1a	1474.43	1039.93	1908.92	1.83504	0.875811	0.000675048	0.0313556	Up	11.9715	10.4013	8.79601	5.54974	3.56702	8.28306	18671	ATP-binding cassette%2C sub-family B (MDR/TAP)%2C member 1A	protein_coding	mmu02010,mmu04976,mmu05206,mmu05226	ABC transporters|Bile secretion|MicroRNAs in cancer|Gastric cancer	GO:0000086,GO:0000166,GO:0005524,GO:0005737,GO:0005886,GO:0008559,GO:0009986,GO:0015562,GO:0016020,GO:0016324,GO:0016887,GO:0022857,GO:0031625,GO:0042626,GO:0042910,GO:0045332,GO:0046581,GO:0046865,GO:0046943,GO:0047484,GO:0055085,GO:0070633,GO:0072089,GO:0090554,GO:0090555,GO:0099038,GO:0099040,GO:0140115,GO:0140326,GO:0140328,GO:0140359,GO:1901529,GO:1905039,GO:1990961,GO:1990962,GO:2001225	G2/M transition of mitotic cell cycle|nucleotide binding|ATP binding|cytoplasm|plasma membrane|ABC-type xenobiotic transporter activity|cell surface|efflux transmembrane transporter activity|membrane|apical plasma membrane|ATP hydrolysis activity|transmembrane transporter activity|ubiquitin protein ligase binding|ATPase-coupled transmembrane transporter activity|xenobiotic transmembrane transport…	WP431	Nuclear receptors in lipid metabolism and toxicity	R-MMU-382551,R-MMU-382556,R-MMU-9748784,R-MMU-9754706,R-MMU-9757110	Transport of small molecules|ABC-family proteins mediated transport|Drug ADME|Atorvastatin ADME|Prednisone ADME
Abcb1b	3115.63	2092.44	4138.82	1.9778	0.983899	0.000483962	0.0247545	Up	21.006	15.9422	33.2459	9.95067	9.25731	17.1398	18669	ATP-binding cassette%2C sub-family B (MDR/TAP)%2C member 1B	protein_coding	mmu02010,mmu04976,mmu05206,mmu05226	ABC transporters|Bile secretion|MicroRNAs in cancer|Gastric cancer	GO:0000086,GO:0000139,GO:0000166,GO:0005524,GO:0005737,GO:0005739,GO:0005886,GO:0006869,GO:0008559,GO:0009410,GO:0009986,GO:0014045,GO:0015562,GO:0016020,GO:0016324,GO:0016887,GO:0031625,GO:0042626,GO:0042910,GO:0045332,GO:0046581,GO:0046943,GO:0047484,GO:0055085,GO:0061843,GO:0070633,GO:0072089,GO:0090554,GO:0090555,GO:0098591,GO:0099038,GO:0099040,GO:0140115,GO:0140326,GO:0140328,GO:0140359,GO:…	G2/M transition of mitotic cell cycle|Golgi membrane|nucleotide binding|ATP binding|cytoplasm|mitochondrion|plasma membrane|lipid transport|ABC-type xenobiotic transporter activity|response to xenobiotic stimulus|cell surface|establishment of endothelial blood-brain barrier|efflux transmembrane transporter activity|membrane|apical plasma membrane|ATP hydrolysis activity|ubiquitin protein ligase b…
Abcb4	13.6833	17.266	10.1005	0.584191	-0.775487	0.313281	0.833854	Down	0.0437164	0.0886981	0.0730792	0.0413865	0.103594	0.218034	18670	ATP-binding cassette%2C sub-family B (MDR/TAP)%2C member 4	protein_coding	mmu02010,mmu04976	ABC transporters|Bile secretion	GO:0000139,GO:0000166,GO:0005524,GO:0005654,GO:0005737,GO:0005829,GO:0005886,GO:0005925,GO:0006855,GO:0006869,GO:0016020,GO:0016324,GO:0016887,GO:0031410,GO:0032376,GO:0032782,GO:0042626,GO:0045332,GO:0046581,GO:0055085,GO:0055088,GO:0061092,GO:0090554,GO:0140326,GO:0140359,GO:1901557,GO:1903413,GO:2001140	Golgi membrane|nucleotide binding|ATP binding|nucleoplasm|cytoplasm|cytosol|plasma membrane|focal adhesion|xenobiotic transmembrane transport|lipid transport|membrane|apical plasma membrane|ATP hydrolysis activity|cytoplasmic vesicle|positive regulation of cholesterol transport|bile acid secretion|ATPase-coupled transmembrane transporter activity|phospholipid translocation|intercellular canalicul…	WP431,WP310	Nuclear receptors in lipid metabolism and toxicity|mRNA processing	R-MMU-382551,R-MMU-382556	Transport of small molecules|ABC-family proteins mediated transport
Abcb6	204.759	191.608	217.91	1.13772	0.186152	0.462295	0.907844	Up	2.34997	1.98162	1.66085	2.01955	1.8063	1.46664	74104	ATP-binding cassette%2C sub-family B (MDR/TAP)%2C member 6	protein_coding	mmu02010	ABC transporters	GO:0000166,GO:0005524,GO:0005576,GO:0005654,GO:0005739,GO:0005740,GO:0005741,GO:0005764,GO:0005765,GO:0005768,GO:0005774,GO:0005783,GO:0005789,GO:0005794,GO:0005829,GO:0005886,GO:0006778,GO:0006779,GO:0006810,GO:0006878,GO:0007420,GO:0015439,GO:0015562,GO:0015886,GO:0016020,GO:0016887,GO:0020037,GO:0031901,GO:0031902,GO:0032585,GO:0033013,GO:0033162,GO:0035351,GO:0036020,GO:0042168,GO:0043588,GO:…	nucleotide binding|ATP binding|extracellular region|nucleoplasm|mitochondrion|mitochondrial envelope|mitochondrial outer membrane|lysosome|lysosomal membrane|endosome|vacuolar membrane|endoplasmic reticulum|endoplasmic reticulum membrane|Golgi apparatus|cytosol|plasma membrane|porphyrin-containing compound metabolic process|porphyrin-containing compound biosynthetic process|transport|intracellula…			R-MMU-1369007,R-MMU-382551,R-MMU-382556	Mitochondrial ABC transporters|Transport of small molecules|ABC-family proteins mediated transport
Abcb7	512.756	501.302	524.21	1.04524	0.063831	0.686502	0.957651	Up	2.75656	2.52271	2.41989	2.27548	2.28031	2.9223	11306	ATP-binding cassette%2C sub-family B (MDR/TAP)%2C member 7	protein_coding	mmu02010	ABC transporters	GO:0000166,GO:0005515,GO:0005524,GO:0005739,GO:0005743,GO:0006879,GO:0016020,GO:0016226,GO:0016887,GO:0034755,GO:0042626,GO:0042803,GO:0055085,GO:0070455,GO:0140359,GO:0140466,GO:0140481,GO:1903331,GO:1903427	nucleotide binding|protein binding|ATP binding|mitochondrion|mitochondrial inner membrane|intracellular iron ion homeostasis|membrane|iron-sulfur cluster assembly|ATP hydrolysis activity|iron ion transmembrane transport|ATPase-coupled transmembrane transporter activity|protein homodimerization activity|transmembrane transport|positive regulation of heme biosynthetic process|ABC-type transporter a…			R-MMU-1369007,R-MMU-382551,R-MMU-382556	Mitochondrial ABC transporters|Transport of small molecules|ABC-family proteins mediated transport
Abcb8	1006.27	954.968	1057.57	1.10733	0.147082	0.371693	0.865488	Up	5.9157	4.62545	4.93306	4.96308	4.36589	4.8007	74610	ATP-binding cassette%2C sub-family B (MDR/TAP)%2C member 8	protein_coding	mmu02010	ABC transporters	GO:0000166,GO:0005524,GO:0005654,GO:0005730,GO:0005739,GO:0005743,GO:0006811,GO:0006813,GO:0006884,GO:0015440,GO:0016020,GO:0016887,GO:0031966,GO:0055085,GO:0062157,GO:0071805,GO:0140141,GO:0140359	nucleotide binding|ATP binding|nucleoplasm|nucleolus|mitochondrion|mitochondrial inner membrane|monoatomic ion transport|potassium ion transport|cell volume homeostasis|ABC-type peptide transporter activity|membrane|ATP hydrolysis activity|mitochondrial membrane|transmembrane transport|mitochondrial ATP-gated potassium channel complex|potassium ion transmembrane transport|mitochondrial potassium …			R-MMU-1369007,R-MMU-382551,R-MMU-382556	Mitochondrial ABC transporters|Transport of small molecules|ABC-family proteins mediated transport
Abcb9	271.984	277.218	266.75	0.961998	-0.0558938	0.775844	0.972379	Down	1.69821	1.50666	1.30037	1.37803	1.57399	1.80063	56325	ATP-binding cassette%2C sub-family B (MDR/TAP)%2C member 9	protein_coding	mmu02010,mmu04142	ABC transporters|Lysosome	GO:0000166,GO:0005524,GO:0005764,GO:0005765,GO:0005789,GO:0006518,GO:0015031,GO:0015421,GO:0015440,GO:0015833,GO:0016020,GO:0016887,GO:0022857,GO:0042626,GO:0042803,GO:0043231,GO:0055085,GO:0140359	nucleotide binding|ATP binding|lysosome|lysosomal membrane|endoplasmic reticulum membrane|peptide metabolic process|protein transport|ABC-type oligopeptide transporter activity|ABC-type peptide transporter activity|peptide transport|membrane|ATP hydrolysis activity|transmembrane transporter activity|ATPase-coupled transmembrane transporter activity|protein homodimerization activity|intracellular …			R-MMU-382551,R-MMU-382556	Transport of small molecules|ABC-family proteins mediated transport
Abcc1	1352.27	1097.07	1607.47	1.46492	0.550823	0.0314544	0.335282	Up	6.99079	5.89436	4.25411	4.59936	2.61065	4.67514	17250	ATP-binding cassette%2C sub-family C (CFTR/MRP)%2C member 1	protein_coding	mmu02010,mmu04071,mmu04977,mmu05206,mmu01523	ABC transporters|Sphingolipid signaling pathway|Vitamin digestion and absorption|MicroRNAs in cancer|Antifolate resistance	GO:0000166,GO:0005324,GO:0005524,GO:0005886,GO:0006869,GO:0006979,GO:0008559,GO:0009410,GO:0009925,GO:0010001,GO:0015420,GO:0015431,GO:0015562,GO:0015889,GO:0015911,GO:0016020,GO:0016323,GO:0016324,GO:0016328,GO:0016787,GO:0016887,GO:0022857,GO:0030335,GO:0033700,GO:0034040,GO:0034634,GO:0034775,GO:0042887,GO:0042908,GO:0042910,GO:0045332,GO:0046943,GO:0048708,GO:0050729,GO:0055085,GO:0060326,GO:…	nucleotide binding|long-chain fatty acid transporter activity|ATP binding|plasma membrane|lipid transport|response to oxidative stress|ABC-type xenobiotic transporter activity|response to xenobiotic stimulus|basal plasma membrane|glial cell differentiation|ABC-type vitamin B12 transporter activity|ABC-type glutathione S-conjugate transporter activity|efflux transmembrane transporter activity|coba…			R-MMU-1430728,R-MMU-189445,R-MMU-189483,R-MMU-196741,R-MMU-196849,R-MMU-196854,R-MMU-2142691,R-MMU-2142753,R-MMU-2262752,R-MMU-382551,R-MMU-382556,R-MMU-556833,R-MMU-8953897,R-MMU-8978868,R-MMU-9707564,R-MMU-9711123,R-MMU-9748784,R-MMU-9753281,R-MMU-9758890	Metabolism|Metabolism of porphyrins|Heme degradation|Cobalamin (Cbl, vitamin B12) transport and metabolism|Metabolism of water-soluble vitamins and cofactors|Metabolism of vitamins and cofactors|Synthesis of Leukotrienes (LT) and Eoxins (EX)|Arachidonic acid metabolism|Cellular responses to stress|Transport of small molecules|ABC-family proteins mediated transport|Metabolism of lipids|Cellular re…
Abcc10	504.132	496.747	511.517	1.0302	0.0429218	0.907015	0.990571	Up	1.62853	1.35247	2.84716	1.44465	2.94172	1.26963	224814	ATP-binding cassette%2C sub-family C (CFTR/MRP)%2C member 10	protein_coding	mmu02010	ABC transporters	GO:0000166,GO:0005524,GO:0005886,GO:0006691,GO:0006869,GO:0008559,GO:0009925,GO:0015431,GO:0016020,GO:0016323,GO:0016887,GO:0042626,GO:0055085,GO:0071716,GO:0140359	nucleotide binding|ATP binding|plasma membrane|leukotriene metabolic process|lipid transport|ABC-type xenobiotic transporter activity|basal plasma membrane|ABC-type glutathione S-conjugate transporter activity|membrane|basolateral plasma membrane|ATP hydrolysis activity|ATPase-coupled transmembrane transporter activity|transmembrane transport|leukotriene transport|ABC-type transporter activity			R-MMU-382551,R-MMU-382556	Transport of small molecules|ABC-family proteins mediated transport
Abcc12	372.466	281.835	463.098	1.64173	0.71522	0.0127482	0.208428	Up	2.76102	2.96427	2.24152	1.86873	0.918702	2.14894	244562	ATP-binding cassette%2C sub-family C (CFTR/MRP)%2C member 12	protein_coding	mmu02010	ABC transporters	GO:0000166,GO:0005524,GO:0005739,GO:0005783,GO:0016020,GO:0016887,GO:0042626,GO:0055085,GO:0140359	nucleotide binding|ATP binding|mitochondrion|endoplasmic reticulum|membrane|ATP hydrolysis activity|ATPase-coupled transmembrane transporter activity|transmembrane transport|ABC-type transporter activity
Abcc2	751.662	697.073	806.251	1.15695	0.210328	0.574849	0.93474	Up	4.51252	2.40391	5.13242	3.21059	5.26669	1.91986	12780	ATP-binding cassette%2C sub-family C (CFTR/MRP)%2C member 2	protein_coding	mmu02010,mmu04976,mmu01524,mmu01523	ABC transporters|Bile secretion|Platinum drug resistance|Antifolate resistance	GO:0005515,GO:0005886,GO:0006855,GO:0008559,GO:0009410,GO:0009986,GO:0010629,GO:0015127,GO:0015431,GO:0015694,GO:0015711,GO:0015721,GO:0015722,GO:0015723,GO:0015732,GO:0016020,GO:0016324,GO:0016999,GO:0019904,GO:0030644,GO:0031526,GO:0042178,GO:0042626,GO:0042910,GO:0043627,GO:0046581,GO:0046618,GO:0046691,GO:0050787,GO:0055085,GO:0070327,GO:0070633,GO:0071716,GO:1901086,GO:1990961,GO:1990962	protein binding|plasma membrane|xenobiotic transmembrane transport|ABC-type xenobiotic transporter activity|response to xenobiotic stimulus|cell surface|negative regulation of gene expression|bilirubin transmembrane transporter activity|ABC-type glutathione S-conjugate transporter activity|mercury ion transport|organic anion transport|bile acid and bile salt transport|canalicular bile acid transp…	WP4466,WP431	Oxidative stress and redox pathway|Nuclear receptors in lipid metabolism and toxicity	R-MMU-1430728,R-MMU-189445,R-MMU-189483,R-MMU-382551,R-MMU-382556,R-MMU-9748784,R-MMU-9749641,R-MMU-9753281,R-MMU-9754706	Metabolism|Metabolism of porphyrins|Heme degradation|Transport of small molecules|ABC-family proteins mediated transport|Drug ADME|Aspirin ADME|Paracetamol ADME|Atorvastatin ADME
Abcc3	282.825	213.964	351.685	1.64322	0.716527	0.000894216	0.0389685	Up	2.25234	1.69984	1.96681	1.37938	1.06819	1.18866	76408	ATP-binding cassette%2C sub-family C (CFTR/MRP)%2C member 3	protein_coding	mmu02010,mmu04976,mmu01523	ABC transporters|Bile secretion|Antifolate resistance	GO:0000166,GO:0005524,GO:0005886,GO:0006855,GO:0006869,GO:0008559,GO:0009925,GO:0015164,GO:0015431,GO:0015432,GO:0015721,GO:0015722,GO:0016020,GO:0016323,GO:0016887,GO:0022857,GO:0042626,GO:0042908,GO:0042910,GO:0055085,GO:0071714,GO:0071716,GO:0098656,GO:0140359	nucleotide binding|ATP binding|plasma membrane|xenobiotic transmembrane transport|lipid transport|ABC-type xenobiotic transporter activity|basal plasma membrane|glucuronoside transmembrane transporter activity|ABC-type glutathione S-conjugate transporter activity|ABC-type bile acid transporter activity|bile acid and bile salt transport|canalicular bile acid transport|membrane|basolateral plasma m…	WP431	Nuclear receptors in lipid metabolism and toxicity	R-MMU-1430728,R-MMU-159418,R-MMU-194068,R-MMU-382551,R-MMU-382556,R-MMU-556833,R-MMU-8957322,R-MMU-9748784,R-MMU-9749641,R-MMU-9753281	Metabolism|Recycling of bile acids and salts|Bile acid and bile salt metabolism|Transport of small molecules|ABC-family proteins mediated transport|Metabolism of lipids|Metabolism of steroids|Drug ADME|Aspirin ADME|Paracetamol ADME
Abcc4	457.734	415.746	499.721	1.20238	0.265893	0.21194	0.760436	Up	1.66171	1.27792	1.70366	1.03306	1.52131	1.35773	239273	ATP-binding cassette%2C sub-family C (CFTR/MRP)%2C member 4	protein_coding	mmu02010,mmu04024,mmu04976,mmu01523	ABC transporters|cAMP signaling pathway|Bile secretion|Antifolate resistance	GO:0000166,GO:0001409,GO:0005524,GO:0005730,GO:0005794,GO:0005886,GO:0005929,GO:0006855,GO:0006869,GO:0008559,GO:0015132,GO:0015143,GO:0015216,GO:0015431,GO:0015432,GO:0015562,GO:0015665,GO:0015721,GO:0015732,GO:0015747,GO:0015850,GO:0016020,GO:0016323,GO:0016324,GO:0016887,GO:0031088,GO:0032310,GO:0034634,GO:0042626,GO:0042910,GO:0048661,GO:0055085,GO:0060271,GO:0070730,GO:0071716,GO:0098591,GO:…	nucleotide binding|guanine nucleotide transmembrane transporter activity|ATP binding|nucleolus|Golgi apparatus|plasma membrane|cilium|xenobiotic transmembrane transport|lipid transport|ABC-type xenobiotic transporter activity|prostaglandin transmembrane transporter activity|urate transmembrane transporter activity|purine nucleotide transmembrane transporter activity|ABC-type glutathione S-conjuga…	WP3625	Tyrobp causal network in microglia	R-MMU-109582,R-MMU-114608,R-MMU-382551,R-MMU-382556,R-MMU-76002,R-MMU-76005,R-MMU-9748784,R-MMU-9748787,R-MMU-9753281	Hemostasis|Platelet degranulation |Transport of small molecules|ABC-family proteins mediated transport|Platelet activation, signaling and aggregation|Response to elevated platelet cytosolic Ca2+|Drug ADME|Azathioprine ADME|Paracetamol ADME
Abcc5	3411.94	2961.67	3862.21	1.30412	0.383079	0.0282162	0.317099	Up	8.69982	9.15459	12.154	6.43139	8.32201	8.53503	27416	ATP-binding cassette%2C sub-family C (CFTR/MRP)%2C member 5	protein_coding	mmu02010,mmu01523	ABC transporters|Antifolate resistance	GO:0000166,GO:0005524,GO:0005768,GO:0005794,GO:0005886,GO:0008559,GO:0015216,GO:0015232,GO:0015562,GO:0015865,GO:0016020,GO:0016323,GO:0016324,GO:0016887,GO:0022884,GO:0030213,GO:0034634,GO:0034775,GO:0035351,GO:0042626,GO:0042908,GO:0042910,GO:0048471,GO:0055085,GO:0070730,GO:0070731,GO:0098838,GO:0140115,GO:0140359,GO:1901505	nucleotide binding|ATP binding|endosome|Golgi apparatus|plasma membrane|ABC-type xenobiotic transporter activity|purine nucleotide transmembrane transporter activity|heme transmembrane transporter activity|efflux transmembrane transporter activity|purine nucleotide transport|membrane|basolateral plasma membrane|apical plasma membrane|ATP hydrolysis activity|macromolecule transmembrane transporter…	WP4466,WP5240	Oxidative stress and redox pathway|Lac-Phe pathway	R-MMU-1430728,R-MMU-1630316,R-MMU-2142845,R-MMU-2142850,R-MMU-382551,R-MMU-382556,R-MMU-71387,R-MMU-9748784,R-MMU-9748787,R-MMU-9753281	Metabolism|Glycosaminoglycan metabolism|Hyaluronan metabolism|Hyaluronan biosynthesis and export|Transport of small molecules|ABC-family proteins mediated transport|Metabolism of carbohydrates|Drug ADME|Azathioprine ADME|Paracetamol ADME
Abcc6	114.938	91.8824	137.994	1.50405	0.588849	0.106215	0.606184	Up	0.690482	0.463217	0.977394	0.43378	0.623482	0.366593	27421	ATP-binding cassette%2C sub-family C (CFTR/MRP)%2C member 6	protein_coding	mmu02010	ABC transporters	GO:0000166,GO:0005524,GO:0005576,GO:0005654,GO:0005886,GO:0006855,GO:0008559,GO:0009925,GO:0010467,GO:0015431,GO:0015867,GO:0016020,GO:0016323,GO:0016324,GO:0016328,GO:0016887,GO:0030504,GO:0030505,GO:0030643,GO:0032026,GO:0042626,GO:0046034,GO:0055062,GO:0055074,GO:0055085,GO:0071716,GO:0140359,GO:0140928,GO:1904383	nucleotide binding|ATP binding|extracellular region|nucleoplasm|plasma membrane|xenobiotic transmembrane transport|ABC-type xenobiotic transporter activity|basal plasma membrane|gene expression|ABC-type glutathione S-conjugate transporter activity|ATP transport|membrane|basolateral plasma membrane|apical plasma membrane|lateral plasma membrane|ATP hydrolysis activity|inorganic diphosphate transme…			R-MMU-382551,R-MMU-382556	Transport of small molecules|ABC-family proteins mediated transport
Abcc8	212.628	171.314	253.942	1.48388	0.569379	0.0888509	0.562361	Up	1.14611	0.992402	1.94494	0.831384	1.22937	0.697819	20927	ATP-binding cassette%2C sub-family C (CFTR/MRP)%2C member 8	protein_coding	mmu02010,mmu04911,mmu04930	ABC transporters|Insulin secretion|Type II diabetes mellitus	GO:0001678,GO:0005267,GO:0005524,GO:0005886,GO:0007613,GO:0008270,GO:0008282,GO:0008542,GO:0009268,GO:0010043,GO:0010989,GO:0016020,GO:0016525,GO:0019829,GO:0030672,GO:0032760,GO:0032991,GO:0035774,GO:0042383,GO:0042626,GO:0043268,GO:0043531,GO:0044325,GO:0044877,GO:0046676,GO:0050768,GO:0050905,GO:0055085,GO:0060253,GO:0061535,GO:0061855,GO:0071310,GO:1900721,GO:1903818,GO:1905075,GO:1905604	intracellular glucose homeostasis|potassium channel activity|ATP binding|plasma membrane|memory|zinc ion binding|inward rectifying potassium channel|visual learning|response to pH|response to zinc ion|negative regulation of low-density lipoprotein particle clearance|membrane|negative regulation of angiogenesis|ATPase-coupled monoatomic cation transmembrane transporter activity|synaptic vesicle me…			R-MMU-112316,R-MMU-1296025,R-MMU-1296065,R-MMU-1296071,R-MMU-1430728,R-MMU-163685,R-MMU-422356	Neuronal System|ATP sensitive Potassium channels|Inwardly rectifying K+ channels|Potassium Channels|Metabolism|Integration of energy metabolism|Regulation of insulin secretion
Abcc9	227.786	214.919	240.654	1.1186	0.161698	0.595477	0.938657	Up	0.975595	0.951352	0.599249	0.770178	0.487237	1.04751	20928	ATP-binding cassette%2C sub-family C (CFTR/MRP)%2C member 9	protein_coding	mmu02010	ABC transporters	GO:0000166,GO:0001508,GO:0001568,GO:0001669,GO:0001816,GO:0003007,GO:0005261,GO:0005267,GO:0005524,GO:0005886,GO:0006813,GO:0008217,GO:0008281,GO:0008282,GO:0009410,GO:0015459,GO:0016020,GO:0016887,GO:0019829,GO:0019905,GO:0022857,GO:0030017,GO:0030315,GO:0033198,GO:0042626,GO:0042802,GO:0044325,GO:0045776,GO:0048144,GO:0051607,GO:0055085,GO:0060976,GO:0061337,GO:0071805,GO:0072359,GO:0086003,GO:…	nucleotide binding|action potential|blood vessel development|acrosomal vesicle|cytokine production|heart morphogenesis|monoatomic cation channel activity|potassium channel activity|ATP binding|plasma membrane|potassium ion transport|regulation of blood pressure|sulfonylurea receptor activity|inward rectifying potassium channel|response to xenobiotic stimulus|potassium channel regulator activity|m…			R-MMU-112316,R-MMU-1296025,R-MMU-1296065,R-MMU-1296071,R-MMU-382551,R-MMU-382556,R-MMU-397014,R-MMU-5576891,R-MMU-5578775	Neuronal System|ATP sensitive Potassium channels|Inwardly rectifying K+ channels|Potassium Channels|Transport of small molecules|ABC-family proteins mediated transport|Muscle contraction|Cardiac conduction|Ion homeostasis
Abcd1	1868.35	1891.25	1845.45	0.975747	-0.0354208	0.799095	0.97746	Down	15.4022	14.2778	13.111	15.528	13.8131	14.9398	11666	ATP-binding cassette%2C sub-family D (ALD)%2C member 1	protein_coding	mmu02010,mmu04146	ABC transporters|Peroxisome	GO:0000038,GO:0000166,GO:0002082,GO:0005324,GO:0005515,GO:0005524,GO:0005737,GO:0005739,GO:0005764,GO:0005765,GO:0005777,GO:0005778,GO:0005783,GO:0005789,GO:0006635,GO:0007031,GO:0015607,GO:0015910,GO:0016020,GO:0016787,GO:0016887,GO:0019899,GO:0030497,GO:0031966,GO:0031998,GO:0032000,GO:0036113,GO:0042626,GO:0042758,GO:0042760,GO:0042802,GO:0042803,GO:0043217,GO:0043531,GO:0046982,GO:0047617,GO:…	very long-chain fatty acid metabolic process|nucleotide binding|regulation of oxidative phosphorylation|long-chain fatty acid transporter activity|protein binding|ATP binding|cytoplasm|mitochondrion|lysosome|lysosomal membrane|peroxisome|peroxisomal membrane|endoplasmic reticulum|endoplasmic reticulum membrane|fatty acid beta-oxidation|peroxisome organization|ABC-type fatty-acyl-CoA transporter a…			R-MMU-1369062,R-MMU-1430728,R-MMU-2046104,R-MMU-2046105,R-MMU-2046106,R-MMU-382551,R-MMU-382556,R-MMU-390247,R-MMU-390918,R-MMU-556833,R-MMU-8978868,R-MMU-9603798,R-MMU-9609507	ABC transporters in lipid homeostasis|Metabolism|alpha-linolenic (omega3) and linoleic (omega6) acid metabolism|Linoleic acid (LA) metabolism|alpha-linolenic acid (ALA) metabolism|Transport of small molecules|ABC-family proteins mediated transport|Beta-oxidation of very long chain fatty acids|Peroxisomal lipid metabolism|Metabolism of lipids|Fatty acid metabolism|Class I peroxisomal membrane prot…
Abcd2	52.5082	37.7219	67.2946	1.78255	0.833945	0.0169133	0.241246	Up	0.297116	0.296033	0.399117	0.154992	0.179161	0.231351	26874	ATP-binding cassette%2C sub-family D (ALD)%2C member 2	protein_coding	mmu02010,mmu04146	ABC transporters|Peroxisome	GO:0000038,GO:0000166,GO:0005324,GO:0005515,GO:0005524,GO:0005739,GO:0005777,GO:0005778,GO:0006629,GO:0006635,GO:0007031,GO:0009617,GO:0015910,GO:0016020,GO:0016787,GO:0016887,GO:0032000,GO:0042626,GO:0042760,GO:0042803,GO:0043217,GO:0046982,GO:0047617,GO:0055085,GO:0140359,GO:1900016,GO:1903427,GO:1990535,GO:2001280	very long-chain fatty acid metabolic process|nucleotide binding|long-chain fatty acid transporter activity|protein binding|ATP binding|mitochondrion|peroxisome|peroxisomal membrane|lipid metabolic process|fatty acid beta-oxidation|peroxisome organization|response to bacterium|long-chain fatty acid import into peroxisome|membrane|hydrolase activity|ATP hydrolysis activity|positive regulation of fa…	WP431	Nuclear receptors in lipid metabolism and toxicity	R-MMU-1369062,R-MMU-382551,R-MMU-382556,R-MMU-9603798,R-MMU-9609507	ABC transporters in lipid homeostasis|Transport of small molecules|ABC-family proteins mediated transport|Class I peroxisomal membrane protein import|Protein localization
Abcd3	2003.16	1882.34	2123.98	1.12818	0.174003	0.192458	0.739547	Up	8.80808	9.68057	8.78354	7.46224	7.27716	9.79365	19299	ATP-binding cassette%2C sub-family D (ALD)%2C member 3	protein_coding	mmu02010,mmu04146	ABC transporters|Peroxisome	GO:0000038,GO:0000166,GO:0005324,GO:0005515,GO:0005524,GO:0005739,GO:0005743,GO:0005777,GO:0005778,GO:0005782,GO:0006633,GO:0006635,GO:0006699,GO:0006869,GO:0007031,GO:0015721,GO:0015910,GO:0016020,GO:0016787,GO:0016887,GO:0042626,GO:0042760,GO:0042803,GO:0043231,GO:0043621,GO:0047617,GO:0055085,GO:0140359,GO:1903512	very long-chain fatty acid metabolic process|nucleotide binding|long-chain fatty acid transporter activity|protein binding|ATP binding|mitochondrion|mitochondrial inner membrane|peroxisome|peroxisomal membrane|peroxisomal matrix|fatty acid biosynthetic process|fatty acid beta-oxidation|bile acid biosynthetic process|lipid transport|peroxisome organization|bile acid and bile salt transport|long-ch…	WP431	Nuclear receptors in lipid metabolism and toxicity	R-MMU-1369062,R-MMU-162582,R-MMU-194315,R-MMU-382551,R-MMU-382556,R-MMU-8980692,R-MMU-9012999,R-MMU-9013106,R-MMU-9603798,R-MMU-9609507,R-MMU-9716542	ABC transporters in lipid homeostasis|Signal Transduction|Signaling by Rho GTPases|Transport of small molecules|ABC-family proteins mediated transport|RHOA GTPase cycle|RHO GTPase cycle|RHOC GTPase cycle|Class I peroxisomal membrane protein import|Protein localization|Signaling by Rho GTPases, Miro GTPases and RHOBTB3
Abcd4	1710.25	1393.66	2026.83	1.45417	0.540194	0.000626414	0.0294903	Up	17.5648	14.4122	17.4588	12.3271	10.0699	11.9812	19300	ATP-binding cassette%2C sub-family D (ALD)%2C member 4	protein_coding	mmu02010,mmu04146	ABC transporters|Peroxisome	GO:0000166,GO:0005324,GO:0005524,GO:0005764,GO:0005765,GO:0005777,GO:0005778,GO:0005783,GO:0005789,GO:0006635,GO:0007031,GO:0009235,GO:0015420,GO:0015889,GO:0015910,GO:0016020,GO:0016887,GO:0042626,GO:0042760,GO:0042802,GO:0055085,GO:0140359,GO:1990830	nucleotide binding|long-chain fatty acid transporter activity|ATP binding|lysosome|lysosomal membrane|peroxisome|peroxisomal membrane|endoplasmic reticulum|endoplasmic reticulum membrane|fatty acid beta-oxidation|peroxisome organization|cobalamin metabolic process|ABC-type vitamin B12 transporter activity|cobalamin transport|long-chain fatty acid import into peroxisome|membrane|ATP hydrolysis act…			R-MMU-1430728,R-MMU-196741,R-MMU-196849,R-MMU-196854,R-MMU-9758881,R-MMU-9758890	Metabolism|Cobalamin (Cbl, vitamin B12) transport and metabolism|Metabolism of water-soluble vitamins and cofactors|Metabolism of vitamins and cofactors|Uptake of dietary cobalamins into enterocytes|Transport of RCbl within the body
Abce1	3536.16	3625.98	3446.33	0.950424	-0.0733575	0.606728	0.941917	Down	26.7305	27.7253	22.0576	28.1817	24.7193	28.4227	24015	ATP-binding cassette%2C sub-family E (OABP)%2C member 1	protein_coding			GO:0000054,GO:0000166,GO:0003924,GO:0005506,GO:0005524,GO:0005737,GO:0005739,GO:0005829,GO:0006413,GO:0006415,GO:0006417,GO:0016787,GO:0016887,GO:0017111,GO:0022626,GO:0032790,GO:0043024,GO:0043273,GO:0046872,GO:0051536,GO:0051539,GO:0060698,GO:0060702,GO:0072344	ribosomal subunit export from nucleus|nucleotide binding|GTPase activity|iron ion binding|ATP binding|cytoplasm|mitochondrion|cytosol|translational initiation|translational termination|regulation of translation|hydrolase activity|ATP hydrolysis activity|ribonucleoside triphosphate phosphatase activity|cytosolic ribosome|ribosome disassembly|ribosomal small subunit binding|CTPase activity|metal io…			R-MMU-1169410,R-MMU-1280215,R-MMU-168256,R-MMU-8983711,R-MMU-909733,R-MMU-913531	Antiviral mechanism by IFN-stimulated genes|Cytokine Signaling in Immune system|Immune System|OAS antiviral response|Interferon alpha/beta signaling|Interferon Signaling
Abcf1	6218.85	5996.99	6440.71	1.07404	0.103045	0.386235	0.873096	Up	59.2188	57.2987	56.5149	53.2029	56.1567	53.1293	224742	ATP-binding cassette%2C sub-family F (GCN20)%2C member 1	protein_coding			GO:0000166,GO:0005524,GO:0005634,GO:0005635,GO:0005654,GO:0005737,GO:0005829,GO:0005840,GO:0006413,GO:0008494,GO:0016887,GO:0042788,GO:0043022,GO:0045727	nucleotide binding|ATP binding|nucleus|nuclear envelope|nucleoplasm|cytoplasm|cytosol|ribosome|translational initiation|translation activator activity|ATP hydrolysis activity|polysomal ribosome|ribosome binding|positive regulation of translation			R-MMU-382551,R-MMU-382556	Transport of small molecules|ABC-family proteins mediated transport
Abcf2	1676.23	1657.38	1695.09	1.02266	0.0323303	0.779844	0.97274	Up	16.0696	15.481	15.4964	15.424	14.502	16.6018	27407	ATP-binding cassette%2C sub-family F (GCN20)%2C member 2	protein_coding			GO:0000166,GO:0005515,GO:0005524,GO:0005739,GO:0008150,GO:0016887	nucleotide binding|protein binding|ATP binding|mitochondrion|biological_process|ATP hydrolysis activity
Abcf3	1079.31	1115.02	1043.6	0.935945	-0.0955046	0.456158	0.905682	Down	9.45247	8.57393	8.82088	9.04645	9.65975	10.3241	27406	ATP-binding cassette%2C sub-family F (GCN20)%2C member 3	protein_coding			GO:0000166,GO:0005515,GO:0005524,GO:0016887,GO:0051607	nucleotide binding|protein binding|ATP binding|ATP hydrolysis activity|defense response to virus
Abcg1	3643.95	3995.63	3292.27	0.824023	-0.279244	0.150841	0.690788	Down	18.2267	15.2353	14.3384	18.371	23.365	16.6175	11307	ATP binding cassette subfamily G member 1	protein_coding	mmu02010,mmu05417	ABC transporters|Lipid and atherosclerosis	GO:0000166,GO:0005524,GO:0005739,GO:0005768,GO:0005783,GO:0005794,GO:0005886,GO:0006869,GO:0008203,GO:0009897,GO:0010745,GO:0010875,GO:0010888,GO:0016020,GO:0016887,GO:0019534,GO:0030301,GO:0032367,GO:0033344,GO:0033700,GO:0033993,GO:0034041,GO:0034374,GO:0034375,GO:0034436,GO:0035774,GO:0042632,GO:0042803,GO:0042987,GO:0043531,GO:0043691,GO:0045542,GO:0046982,GO:0050714,GO:0055037,GO:0055085,GO:…	nucleotide binding|ATP binding|mitochondrion|endosome|endoplasmic reticulum|Golgi apparatus|plasma membrane|lipid transport|cholesterol metabolic process|external side of plasma membrane|negative regulation of macrophage derived foam cell differentiation|positive regulation of cholesterol efflux|negative regulation of lipid storage|membrane|ATP hydrolysis activity|toxin transmembrane transporter …	WP431,WP4346	Nuclear receptors in lipid metabolism and toxicity|Cholesterol metabolism with Bloch and Kandutsch-Russell pathways	R-MMU-1369062,R-MMU-174824,R-MMU-382551,R-MMU-382556,R-MMU-8963899,R-MMU-8964058	ABC transporters in lipid homeostasis|Plasma lipoprotein assembly, remodeling, and clearance|Transport of small molecules|ABC-family proteins mediated transport|Plasma lipoprotein remodeling|HDL remodeling
Abcg2	2404.49	3023.51	1785.47	0.590591	-0.759768	5.08841e-06	0.000755265	Down	13.5753	12.3595	14.9049	20.9354	26.9305	21.8261	26357	ATP binding cassette subfamily G member 2 (Junior blood group)	protein_coding	mmu02010,mmu04976,mmu01523	ABC transporters|Bile secretion|Antifolate resistance	GO:0000166,GO:0005524,GO:0005654,GO:0005739,GO:0005886,GO:0006869,GO:0008092,GO:0008514,GO:0008559,GO:0015143,GO:0015225,GO:0015562,GO:0015711,GO:0015747,GO:0015878,GO:0016020,GO:0016324,GO:0019389,GO:0031526,GO:0032217,GO:0032218,GO:0042626,GO:0042802,GO:0042803,GO:0042887,GO:0042910,GO:0045121,GO:0046415,GO:0055085,GO:0060136,GO:0065003,GO:0070633,GO:0097744,GO:0098591,GO:0140115,GO:0140359,GO:…	nucleotide binding|ATP binding|nucleoplasm|mitochondrion|plasma membrane|lipid transport|cytoskeletal protein binding|organic anion transmembrane transporter activity|ABC-type xenobiotic transporter activity|urate transmembrane transporter activity|biotin transmembrane transporter activity|efflux transmembrane transporter activity|organic anion transport|urate transport|biotin transport|membrane|…			R-MMU-1430728,R-MMU-189445,R-MMU-189451,R-MMU-189483,R-MMU-382551,R-MMU-917937,R-MMU-9748784,R-MMU-9753281,R-MMU-9793528	Metabolism|Metabolism of porphyrins|Heme biosynthesis|Heme degradation|Transport of small molecules|Iron uptake and transport|Drug ADME|Paracetamol ADME|Ciprofloxacin ADME
Abcg3	14.0551	12.8944	15.2157	1.17681	0.234879	0.711949	0.962116	Up	0.120183	0.105666	0.112507	0.130031	0.0569591	0.102755	27405	ATP binding cassette subfamily G member 3	protein_coding	mmu02010	ABC transporters	GO:0005524,GO:0005654,GO:0005886,GO:0008559,GO:0015143,GO:0015562,GO:0016020,GO:0031526,GO:0032217,GO:0032218,GO:0042626,GO:0042802,GO:0042803,GO:0045121,GO:0046415,GO:0055085,GO:0070633,GO:0097744,GO:0140359,GO:1990748,GO:1990962	ATP binding|nucleoplasm|plasma membrane|ABC-type xenobiotic transporter activity|urate transmembrane transporter activity|efflux transmembrane transporter activity|membrane|brush border membrane|riboflavin transmembrane transporter activity|riboflavin transport|ATPase-coupled transmembrane transporter activity|identical protein binding|protein homodimerization activity|membrane raft|urate metabol…
Abcg4	11.9254	11.5762	12.2747	1.06208	0.0868918	0.905932	0.990571	Up	0.0449084	0.0740322	0.0731949	0.0956586	0.0498838	0.0335968	192663	ATP binding cassette subfamily G member 4	protein_coding	mmu02010	ABC transporters	GO:0000166,GO:0005524,GO:0005768,GO:0005886,GO:0006355,GO:0010008,GO:0010875,GO:0015918,GO:0016020,GO:0016887,GO:0031410,GO:0033344,GO:0034041,GO:0042632,GO:0042802,GO:0042803,GO:0045542,GO:0046982,GO:0055085,GO:0071403,GO:0140359,GO:1990830	nucleotide binding|ATP binding|endosome|plasma membrane|regulation of DNA-templated transcription|endosome membrane|positive regulation of cholesterol efflux|sterol transport|membrane|ATP hydrolysis activity|cytoplasmic vesicle|cholesterol efflux|ABC-type sterol transporter activity|cholesterol homeostasis|identical protein binding|protein homodimerization activity|positive regulation of choleste…			R-MMU-1369062,R-MMU-382551,R-MMU-382556	ABC transporters in lipid homeostasis|Transport of small molecules|ABC-family proteins mediated transport
Abcg5	1.89847	2.70181	1.09513	0.403355	-1.30988	0.466537	0.907844	Down	0.0252761	0.0128209	0	0.0615316	0.0112306	0.0216109	27409	ATP binding cassette subfamily G member 5	protein_coding	mmu02010,mmu04976,mmu04975,mmu04979	ABC transporters|Bile secretion|Fat digestion and absorption|Cholesterol metabolism	GO:0000166,GO:0005515,GO:0005524,GO:0005886,GO:0006869,GO:0010949,GO:0015918,GO:0016020,GO:0016324,GO:0016887,GO:0030299,GO:0033344,GO:0042626,GO:0042632,GO:0043190,GO:0043235,GO:0045177,GO:0045796,GO:0046872,GO:0046982,GO:0055085,GO:0120020,GO:0140359	nucleotide binding|protein binding|ATP binding|plasma membrane|lipid transport|negative regulation of intestinal phytosterol absorption|sterol transport|membrane|apical plasma membrane|ATP hydrolysis activity|intestinal cholesterol absorption|cholesterol efflux|ATPase-coupled transmembrane transporter activity|cholesterol homeostasis|ATP-binding cassette (ABC) transporter complex|receptor complex…	WP1259,WP431	Retinol metabolism|Nuclear receptors in lipid metabolism and toxicity	R-MMU-1369062,R-MMU-382551,R-MMU-382556	ABC transporters in lipid homeostasis|Transport of small molecules|ABC-family proteins mediated transport
Abhd10	258.017	250.836	265.198	1.05734	0.0804375	0.705798	0.961408	Up	1.08157	1.34617	0.925284	1.15422	0.985351	1.05296	213012	abhydrolase domain containing 10	protein_coding			GO:0002084,GO:0004553,GO:0005739,GO:0005829,GO:0008474,GO:0016787,GO:0019391,GO:0102390	protein depalmitoylation|hydrolase activity, hydrolyzing O-glycosyl compounds|mitochondrion|cytosol|palmitoyl-(protein) hydrolase activity|hydrolase activity|glucuronoside catabolic process|mycophenolic acid acyl-glucuronide esterase activity			R-MMU-1430728,R-MMU-156580,R-MMU-156588,R-MMU-211859	Metabolism|Phase II - Conjugation of compounds|Glucuronidation|Biological oxidations
Abhd11	564.583	586.96	542.205	0.923482	-0.114844	0.516583	0.921254	Down	8.33232	8.96809	11.055	9.85966	8.95879	12.3184	68758	abhydrolase domain containing 11	protein_coding			GO:0003824,GO:0005739,GO:0016787,GO:0044255,GO:0052689	catalytic activity|mitochondrion|hydrolase activity|cellular lipid metabolic process|carboxylic ester hydrolase activity
Abhd11os	58.0347	64.5794	51.4901	0.797182	-0.32702	0.451677	0.904209	Down	3.10797	1.42192	4.15639	4.10443	3.4117	3.49095	69812	abhydrolase domain containing 11%2C opposite strand	non_coding			GO:0003674,GO:0005575,GO:0008150	molecular_function|cellular_component|biological_process
Abhd12	2385.93	2428.97	2342.89	0.964501	-0.052145	0.702113	0.961187	Down	27.7048	25.1744	27.7879	24.2726	27.65	33.0076	76192	abhydrolase domain containing 12	protein_coding			GO:0002084,GO:0004620,GO:0004622,GO:0005737,GO:0005739,GO:0005783,GO:0005789,GO:0006629,GO:0006660,GO:0007628,GO:0008474,GO:0009395,GO:0010996,GO:0016020,GO:0016787,GO:0032281,GO:0032839,GO:0046464,GO:0046475,GO:0047372,GO:0050727,GO:0052651	protein depalmitoylation|phospholipase activity|lysophospholipase activity|cytoplasm|mitochondrion|endoplasmic reticulum|endoplasmic reticulum membrane|lipid metabolic process|phosphatidylserine catabolic process|adult walking behavior|palmitoyl-(protein) hydrolase activity|phospholipid catabolic process|response to auditory stimulus|membrane|hydrolase activity|AMPA glutamate receptor complex|den…			R-MMU-109582,R-MMU-114508,R-MMU-162582,R-MMU-372790,R-MMU-388396,R-MMU-416476,R-MMU-426048,R-MMU-76002	Hemostasis|Effects of PIP2 hydrolysis|Signal Transduction|Signaling by GPCR|GPCR downstream signalling|G alpha (q) signalling events|Arachidonate production from DAG|Platelet activation, signaling and aggregation
Abhd12b	110.79	43.5097	178.069	4.09061	2.03232	1.32047e-06	0.000274393	Up	1.67947	2.03844	1.2333	0.673298	0.248738	0.282058	100504285	abhydrolase domain containing 12B	protein_coding			GO:0004622,GO:0005789,GO:0006660,GO:0047372,GO:0052651	lysophospholipase activity|endoplasmic reticulum membrane|phosphatidylserine catabolic process|acylglycerol lipase activity|monoacylglycerol catabolic process
Abhd13	1439.48	1476.15	1402.81	0.950395	-0.073401	0.560972	0.933099	Down	7.87488	7.89338	7.14935	8.03184	8.15287	8.15096	68904	abhydrolase domain containing 13	protein_coding			GO:0002084,GO:0005737,GO:0008474,GO:0016020,GO:0016787,GO:0032839	protein depalmitoylation|cytoplasm|palmitoyl-(protein) hydrolase activity|membrane|hydrolase activity|dendrite cytoplasm
Abhd14a	245.368	161.812	328.924	2.02997	1.02146	1.82684e-05	0.00213395	Up	4.88902	5.06456	5.78428	2.13729	2.11108	3.66493	68644	abhydrolase domain containing 14A	protein_coding			GO:0005737,GO:0016020,GO:0016787	cytoplasm|membrane|hydrolase activity
Abhd14b	578.116	522.903	633.33	1.21163	0.276952	0.454767	0.90536	Up	6.92107	5.41468	13.4572	6.17542	10.333	4.76406	76491	abhydrolase domain containing 14b	protein_coding			GO:0005634,GO:0005654,GO:0005730,GO:0005737,GO:0005829,GO:0016740,GO:0016746,GO:0016787,GO:0045944	nucleus|nucleoplasm|nucleolus|cytoplasm|cytosol|transferase activity|acyltransferase activity|hydrolase activity|positive regulation of transcription by RNA polymerase II
Abhd15	158.436	155.293	161.579	1.03973	0.0562088	0.854273	0.98672	Up	1.87567	1.351	0.968869	1.5677	1.08341	1.4353	67477	abhydrolase domain containing 15	protein_coding			GO:0005515,GO:0005576,GO:0016042,GO:0034338,GO:0044255,GO:0047372,GO:0060612	protein binding|extracellular region|lipid catabolic process|short-chain carboxylesterase activity|cellular lipid metabolic process|acylglycerol lipase activity|adipose tissue development
Abhd16a	2088.36	1987.72	2189.01	1.10122	0.139098	0.332804	0.845176	Up	26.6244	26.1778	33.1995	25.0467	24.6771	29.3522	193742	abhydrolase domain containing 16A	protein_coding	mmu00561	Glycerolipid metabolism	GO:0004620,GO:0006629,GO:0006660,GO:0016020,GO:0016787,GO:0047372,GO:0052651,GO:1905344	phospholipase activity|lipid metabolic process|phosphatidylserine catabolic process|membrane|hydrolase activity|acylglycerol lipase activity|monoacylglycerol catabolic process|prostaglandin catabolic process
Abhd17a	2237.72	2111.03	2364.41	1.11989	0.163353	0.165979	0.708914	Up	14.0932	14.1766	15.0955	12.6038	11.8315	14.7925	216169	abhydrolase domain containing 17A	protein_coding			GO:0002084,GO:0005768,GO:0005886,GO:0008474,GO:0010008,GO:0014069,GO:0016020,GO:0016607,GO:0016787,GO:0042995,GO:0043231,GO:0045202,GO:0045211,GO:0055038,GO:0072657,GO:0098839,GO:0098944,GO:0098978,GO:0099175,GO:1902817,GO:1905668	protein depalmitoylation|endosome|plasma membrane|palmitoyl-(protein) hydrolase activity|endosome membrane|postsynaptic density|membrane|nuclear speck|hydrolase activity|cell projection|intracellular membrane-bounded organelle|synapse|postsynaptic membrane|recycling endosome membrane|protein localization to membrane|postsynaptic density membrane|postsynaptic recycling endosome membrane|glutamater…			R-MMU-162582,R-MMU-5673001,R-MMU-5683057,R-MMU-5684996,R-MMU-9648002	Signal Transduction|RAF/MAP kinase cascade|MAPK family signaling cascades|MAPK1/MAPK3 signaling|RAS processing
Abhd17b	779.043	803.844	754.241	0.938487	-0.091592	0.527533	0.925734	Down	7.42155	7.71942	8.00874	7.10667	8.88171	8.97039	226016	abhydrolase domain containing 17B	protein_coding			GO:0002084,GO:0005768,GO:0005886,GO:0006508,GO:0008236,GO:0008474,GO:0010008,GO:0014069,GO:0016020,GO:0016787,GO:0042995,GO:0045202,GO:0045211,GO:0055038,GO:0098839,GO:0098944,GO:0098978,GO:0099175,GO:1902473,GO:1902817,GO:1902950,GO:1905668	protein depalmitoylation|endosome|plasma membrane|proteolysis|serine-type peptidase activity|palmitoyl-(protein) hydrolase activity|endosome membrane|postsynaptic density|membrane|hydrolase activity|cell projection|synapse|postsynaptic membrane|recycling endosome membrane|postsynaptic density membrane|postsynaptic recycling endosome membrane|glutamatergic synapse|regulation of postsynapse organiz…			R-MMU-162582,R-MMU-5673001,R-MMU-5683057,R-MMU-5684996,R-MMU-9648002	Signal Transduction|RAF/MAP kinase cascade|MAPK family signaling cascades|MAPK1/MAPK3 signaling|RAS processing
Abhd17c	2156.81	2119.39	2194.22	1.03543	0.0502365	0.832837	0.983669	Up	24.6567	22.0716	36.2562	25.068	33.0053	22.3851	70178	abhydrolase domain containing 17C	protein_coding			GO:0002084,GO:0005768,GO:0005886,GO:0008474,GO:0010008,GO:0014069,GO:0016020,GO:0016787,GO:0042995,GO:0045202,GO:0045211,GO:0098978,GO:0099175,GO:1902817,GO:1905668	protein depalmitoylation|endosome|plasma membrane|palmitoyl-(protein) hydrolase activity|endosome membrane|postsynaptic density|membrane|hydrolase activity|cell projection|synapse|postsynaptic membrane|glutamatergic synapse|regulation of postsynapse organization|negative regulation of protein localization to microtubule|positive regulation of protein localization to endosome			R-MMU-162582,R-MMU-5673001,R-MMU-5683057,R-MMU-5684996,R-MMU-9648002	Signal Transduction|RAF/MAP kinase cascade|MAPK family signaling cascades|MAPK1/MAPK3 signaling|RAS processing
Abhd18	612.539	666.28	558.798	0.838913	-0.253408	0.112111	0.617348	Down	3.37992	3.11183	3.40285	3.45163	4.37493	4.10026	269423	abhydrolase domain containing 18	protein_coding			GO:0003674,GO:0005575,GO:0005576,GO:0008150	molecular_function|cellular_component|extracellular region|biological_process
Abhd2	13289.1	13090	13488.1	1.0304	0.0432048	0.783513	0.973961	Up	64.3739	49.4172	49.7269	54.8773	50.5045	55.2149	54608	abhydrolase domain containing 2	protein_coding			GO:0001669,GO:0003707,GO:0005886,GO:0006629,GO:0007340,GO:0008126,GO:0009611,GO:0014909,GO:0014912,GO:0016020,GO:0016042,GO:0016787,GO:0031410,GO:0032570,GO:0033878,GO:0036126,GO:0042562,GO:0043401,GO:0046464,GO:0047372,GO:0048240,GO:0051792,GO:0051793,GO:0052689,GO:0097524	acrosomal vesicle|nuclear steroid receptor activity|plasma membrane|lipid metabolic process|acrosome reaction|acetylesterase activity|response to wounding|smooth muscle cell migration|negative regulation of smooth muscle cell migration|membrane|lipid catabolic process|hydrolase activity|cytoplasmic vesicle|response to progesterone|hormone-sensitive lipase activity|sperm flagellum|hormone binding|…
Abhd3	633.228	559.222	707.233	1.2643	0.338335	0.0720042	0.509657	Up	5.98332	4.53293	4.5588	3.49476	3.82713	4.81322	106861	abhydrolase domain containing 3	protein_coding			GO:0004623,GO:0005575,GO:0006629,GO:0008126,GO:0008970,GO:0016020,GO:0016787,GO:0046470,GO:0047372,GO:0051792,GO:0051793,GO:0052689,GO:0052739,GO:0052740	phospholipase A2 activity|cellular_component|lipid metabolic process|acetylesterase activity|phospholipase A1 activity|membrane|hydrolase activity|phosphatidylcholine metabolic process|acylglycerol lipase activity|medium-chain fatty acid biosynthetic process|medium-chain fatty acid catabolic process|carboxylic ester hydrolase activity|phosphatidylserine 1-acylhydrolase activity|1-acyl-2-lysophosp…			R-MMU-1430728,R-MMU-1483191,R-MMU-1483206,R-MMU-1483257,R-MMU-556833	Metabolism|Synthesis of PC|Glycerophospholipid biosynthesis|Phospholipid metabolism|Metabolism of lipids
Abhd4	2585.76	2653.63	2517.9	0.948932	-0.0756229	0.598685	0.939515	Down	25.304	24.4691	25.4987	22.3062	29.6307	28.3157	105501	abhydrolase domain containing 4	protein_coding			GO:0004622,GO:0005739,GO:0005811,GO:0006629,GO:0006654,GO:0016042,GO:0016787,GO:0042171,GO:0055088,GO:0070291,GO:0070292	lysophospholipase activity|mitochondrion|lipid droplet|lipid metabolic process|phosphatidic acid biosynthetic process|lipid catabolic process|hydrolase activity|lysophosphatidic acid acyltransferase activity|lipid homeostasis|N-acylethanolamine metabolic process|N-acylphosphatidylethanolamine metabolic process			R-MMU-1430728,R-MMU-1482839,R-MMU-1483206,R-MMU-1483257,R-MMU-556833	Metabolism|Acyl chain remodelling of PE|Glycerophospholipid biosynthesis|Phospholipid metabolism|Metabolism of lipids
Abhd5	3732.93	4171.71	3294.16	0.789625	-0.34076	0.013716	0.218451	Down	23.5061	24.9579	25.8561	26.2469	31.4623	37.8426	67469	abhydrolase domain containing 5	protein_coding	mmu04923	Regulation of lipolysis in adipocytes	GO:0003841,GO:0004806,GO:0005515,GO:0005654,GO:0005737,GO:0005739,GO:0005811,GO:0005829,GO:0006629,GO:0006631,GO:0006654,GO:0008654,GO:0010891,GO:0010898,GO:0016740,GO:0016746,GO:0030154,GO:0042171,GO:0043231,GO:0050996,GO:0052689,GO:0055088,GO:0060229	1-acylglycerol-3-phosphate O-acyltransferase activity|triglyceride lipase activity|protein binding|nucleoplasm|cytoplasm|mitochondrion|lipid droplet|cytosol|lipid metabolic process|fatty acid metabolic process|phosphatidic acid biosynthetic process|phospholipid biosynthetic process|negative regulation of sequestering of triglyceride|positive regulation of triglyceride catabolic process|transferas…
Abhd6	4307.29	4361.4	4253.19	0.975126	-0.0363391	0.783872	0.973961	Down	8.72628	9.02185	7.53153	8.36045	7.86093	10.0601	66082	abhydrolase domain containing 6	protein_coding	mmu04723	Retrograde endocannabinoid signaling	GO:0003824,GO:0004620,GO:0005739,GO:0005764,GO:0005765,GO:0005768,GO:0006629,GO:0009395,GO:0016020,GO:0016787,GO:0030336,GO:0031902,GO:0032281,GO:0045211,GO:0046464,GO:0046889,GO:0047372,GO:0052651,GO:0060292,GO:0098978,GO:0098982,GO:0099178,GO:0120163,GO:2000124,GO:2001311	catalytic activity|phospholipase activity|mitochondrion|lysosome|lysosomal membrane|endosome|lipid metabolic process|phospholipid catabolic process|membrane|hydrolase activity|negative regulation of cell migration|late endosome membrane|AMPA glutamate receptor complex|postsynaptic membrane|acylglycerol catabolic process|positive regulation of lipid biosynthetic process|acylglycerol lipase activit…			R-MMU-109582,R-MMU-114508,R-MMU-162582,R-MMU-372790,R-MMU-388396,R-MMU-416476,R-MMU-426048,R-MMU-76002	Hemostasis|Effects of PIP2 hydrolysis|Signal Transduction|Signaling by GPCR|GPCR downstream signalling|G alpha (q) signalling events|Arachidonate production from DAG|Platelet activation, signaling and aggregation
Abhd8	345.823	336.105	355.54	1.0583	0.0817521	0.69935	0.960323	Up	3.95935	3.95616	3.86357	2.75803	4.44041	4.07858	64296	abhydrolase domain containing 8	protein_coding			GO:0003824,GO:0016787	catalytic activity|hydrolase activity
Abi1	3998.14	4105.2	3891.09	0.9478	-0.0773449	0.473522	0.910176	Down	30.3798	28.8399	29.7442	30.8784	29.74	34.3792	11308	abl interactor 1	protein_coding	mmu05132	Salmonella infection	GO:0001756,GO:0005515,GO:0005622,GO:0005634,GO:0005737,GO:0005856,GO:0014069,GO:0017124,GO:0030027,GO:0030296,GO:0031209,GO:0031252,GO:0032433,GO:0035591,GO:0035855,GO:0042995,GO:0043005,GO:0045202,GO:0048813,GO:0061098,GO:0072673,GO:0098978,GO:0099527	somitogenesis|protein binding|intracellular anatomical structure|nucleus|cytoplasm|cytoskeleton|postsynaptic density|SH3 domain binding|lamellipodium|protein tyrosine kinase activator activity|SCAR complex|cell leading edge|filopodium tip|signaling adaptor activity|megakaryocyte development|cell projection|neuron projection|synapse|dendrite morphogenesis|positive regulation of protein tyrosine ki…	WP572,WP88	EGFR1 signaling pathway|Toll-like receptor signaling	R-MMU-162582,R-MMU-168249,R-MMU-168256,R-MMU-194138,R-MMU-194315,R-MMU-195258,R-MMU-2029480,R-MMU-2029482,R-MMU-4420097,R-MMU-5663213,R-MMU-9006934,R-MMU-9012999,R-MMU-9013149,R-MMU-9013404,R-MMU-9013423,R-MMU-9716542	Signal Transduction|Innate Immune System|Immune System|Signaling by VEGF|Signaling by Rho GTPases|RHO GTPase Effectors|Fcgamma receptor (FCGR) dependent phagocytosis|Regulation of actin dynamics for phagocytic cup formation|VEGFA-VEGFR2 Pathway|RHO GTPases Activate WASPs and WAVEs|Signaling by Receptor Tyrosine Kinases|RHO GTPase cycle|RAC1 GTPase cycle|RAC2 GTPase cycle|RAC3 GTPase cycle|Signali…
Abi2	975.848	952.754	998.943	1.04813	0.0678151	0.690179	0.958548	Up	2.78376	2.67663	2.44345	2.20111	2.21801	3.26197	329165	abl interactor 2	protein_coding	mmu04810	Regulation of actin cytoskeleton	GO:0001764,GO:0005737,GO:0005829,GO:0005856,GO:0005884,GO:0005912,GO:0007399,GO:0007611,GO:0010592,GO:0016358,GO:0016477,GO:0016601,GO:0017124,GO:0030027,GO:0030425,GO:0031209,GO:0031267,GO:0031625,GO:0032433,GO:0035591,GO:0042802,GO:0042995,GO:0043010,GO:0043197,GO:0045186,GO:0045202,GO:0061001,GO:0061098,GO:0070064,GO:0070161,GO:0070309,GO:0098871,GO:0098974,GO:0098978,GO:0099173,GO:2000601	neuron migration|cytoplasm|cytosol|cytoskeleton|actin filament|adherens junction|nervous system development|learning or memory|positive regulation of lamellipodium assembly|dendrite development|cell migration|Rac protein signal transduction|SH3 domain binding|lamellipodium|dendrite|SCAR complex|small GTPase binding|ubiquitin protein ligase binding|filopodium tip|signaling adaptor activity|identic…	WP523	Regulation of actin cytoskeleton	R-MMU-162582,R-MMU-168249,R-MMU-168256,R-MMU-194138,R-MMU-194315,R-MMU-195258,R-MMU-2029480,R-MMU-2029482,R-MMU-4420097,R-MMU-5663213,R-MMU-9006934,R-MMU-9012999,R-MMU-9013149,R-MMU-9013404,R-MMU-9013423,R-MMU-9716542	Signal Transduction|Innate Immune System|Immune System|Signaling by VEGF|Signaling by Rho GTPases|RHO GTPase Effectors|Fcgamma receptor (FCGR) dependent phagocytosis|Regulation of actin dynamics for phagocytic cup formation|VEGFA-VEGFR2 Pathway|RHO GTPases Activate WASPs and WAVEs|Signaling by Receptor Tyrosine Kinases|RHO GTPase cycle|RAC1 GTPase cycle|RAC2 GTPase cycle|RAC3 GTPase cycle|Signali…
Abi3	236.429	203.71	269.149	1.31994	0.400469	0.211817	0.760436	Up	0.839896	1.12094	0.618001	0.603333	0.416004	0.977093	66610	ABI family member 3	protein_coding			GO:0002357,GO:0005515,GO:0005622,GO:0005737,GO:0010593,GO:0017124,GO:0018108,GO:0030027,GO:0030334,GO:0031209,GO:0042802,GO:0061098,GO:1903077,GO:2000774	defense response to tumor cell|protein binding|intracellular anatomical structure|cytoplasm|negative regulation of lamellipodium assembly|SH3 domain binding|peptidyl-tyrosine phosphorylation|lamellipodium|regulation of cell migration|SCAR complex|identical protein binding|positive regulation of protein tyrosine kinase activity|negative regulation of protein localization to plasma membrane|positiv…
Abi3bp	166.134	128.063	204.205	1.59584	0.674315	0.0956756	0.581685	Up	0.591845	1.13684	1.0364	0.834548	0.581976	0.294489	320712	ABI family member 3 binding protein	protein_coding			GO:0005201,GO:0005518,GO:0005539,GO:0005614,GO:0008201,GO:0008285,GO:0010811,GO:0014069,GO:0030027,GO:0030036,GO:0030198,GO:0031012,GO:0043197,GO:0043198,GO:0051015,GO:0061001,GO:0062023,GO:0099151,GO:1904597,GO:1905209	extracellular matrix structural constituent|collagen binding|glycosaminoglycan binding|interstitial matrix|heparin binding|negative regulation of cell population proliferation|positive regulation of cell-substrate adhesion|postsynaptic density|lamellipodium|actin cytoskeleton organization|extracellular matrix organization|extracellular matrix|dendritic spine|dendritic shaft|actin filament binding…
Abitram	416.416	410.498	422.334	1.02862	0.0407068	0.810855	0.978788	Up	2.73913	2.73234	2.19656	2.52506	2.32951	2.68288	230234	actin binding transcription modulator	protein_coding			GO:0003779,GO:0003785,GO:0005634,GO:0016607,GO:0030027,GO:0030425,GO:0030426,GO:0030833,GO:0032433,GO:0042995,GO:0048813,GO:0051015,GO:0051489	actin binding|actin monomer binding|nucleus|nuclear speck|lamellipodium|dendrite|growth cone|regulation of actin filament polymerization|filopodium tip|cell projection|dendrite morphogenesis|actin filament binding|regulation of filopodium assembly
Abl1	2766.75	2676.02	2857.49	1.06777	0.0945985	0.500998	0.916564	Up	9.30854	10.3614	7.98173	8.771	7.98419	9.42011	11350	c-abl oncogene 1%2C non-receptor tyrosine kinase	protein_coding	mmu04012,mmu04014,mmu04110,mmu04722,mmu04360,mmu05200,mmu05206,mmu05208,mmu05220,mmu05416	ErbB signaling pathway|Ras signaling pathway|Cell cycle|Neurotrophin signaling pathway|Axon guidance|Pathways in cancer|MicroRNAs in cancer|Chemical carcinogenesis - reactive oxygen species|Chronic myeloid leukemia|Viral myocarditis	GO:0000166,GO:0000287,GO:0000400,GO:0000405,GO:0001726,GO:0001784,GO:0001843,GO:0001922,GO:0001934,GO:0002322,GO:0002333,GO:0003677,GO:0004672,GO:0004713,GO:0004715,GO:0005080,GO:0005515,GO:0005524,GO:0005634,GO:0005654,GO:0005730,GO:0005737,GO:0005739,GO:0005829,GO:0005856,GO:0006281,GO:0006468,GO:0006897,GO:0006909,GO:0006914,GO:0006915,GO:0006974,GO:0006979,GO:0007155,GO:0007173,GO:0007204,GO:…	nucleotide binding|magnesium ion binding|four-way junction DNA binding|bubble DNA binding|ruffle|phosphotyrosine residue binding|neural tube closure|B-1 B cell homeostasis|positive regulation of protein phosphorylation|B cell proliferation involved in immune response|transitional one stage B cell differentiation|DNA binding|protein kinase activity|protein tyrosine kinase activity|non-membrane spa…	WP488,WP407,WP1261	Alpha 6 beta 4 integrin signaling pathway|Kit receptor signaling pathway|ErbB signaling pathway	R-MMU-1266738,R-MMU-162582,R-MMU-1640170,R-MMU-168249,R-MMU-168256,R-MMU-194315,R-MMU-195258,R-MMU-2029480,R-MMU-2029482,R-MMU-212436,R-MMU-376176,R-MMU-422475,R-MMU-428890,R-MMU-453279,R-MMU-525793,R-MMU-5663213,R-MMU-5685938,R-MMU-5693532,R-MMU-5693538,R-MMU-5693565,R-MMU-5693567,R-MMU-5693606,R-MMU-69231,R-MMU-69236,R-MMU-69278,R-MMU-73857,R-MMU-73894,R-MMU-74160,R-MMU-8878171,R-MMU-8939236,R-…	Developmental Biology|Signal Transduction|Cell Cycle|Innate Immune System|Immune System|Signaling by Rho GTPases|RHO GTPase Effectors|Fcgamma receptor (FCGR) dependent phagocytosis|Regulation of actin dynamics for phagocytic cup formation|Generic Transcription Pathway|Signaling by ROBO receptors|Axon guidance|Role of ABL in ROBO-SLIT signaling|Mitotic G1 phase and G1/S transition|Myogenesis|RHO G…
Abl2	2085.41	2149.53	2021.29	0.940437	-0.0885967	0.641389	0.947445	Down	4.96115	4.18038	3.87464	4.76236	5.22972	3.92218	11352	v-abl Abelson murine leukemia viral oncogene 2 (arg%2C Abelson-related gene)	protein_coding	mmu04012,mmu04014,mmu05208,mmu05416	ErbB signaling pathway|Ras signaling pathway|Chemical carcinogenesis - reactive oxygen species|Viral myocarditis	GO:0000166,GO:0000287,GO:0001784,GO:0001843,GO:0001891,GO:0002118,GO:0004672,GO:0004713,GO:0004715,GO:0005515,GO:0005524,GO:0005737,GO:0005856,GO:0006468,GO:0006909,GO:0006930,GO:0007015,GO:0007155,GO:0007173,GO:0007204,GO:0007249,GO:0007266,GO:0007612,GO:0007628,GO:0008104,GO:0008542,GO:0009791,GO:0010863,GO:0010976,GO:0015629,GO:0016301,GO:0016310,GO:0016322,GO:0016740,GO:0018108,GO:0021587,GO:…	nucleotide binding|magnesium ion binding|phosphotyrosine residue binding|neural tube closure|phagocytic cup|aggressive behavior|protein kinase activity|protein tyrosine kinase activity|non-membrane spanning protein tyrosine kinase activity|protein binding|ATP binding|cytoplasm|cytoskeleton|protein phosphorylation|phagocytosis|substrate-dependent cell migration, cell extension|actin filament organ…
Ablim1	2542.54	2633.79	2451.28	0.930778	-0.103491	0.425986	0.891568	Down	6.03492	6.59753	7.32471	7.27317	7.17125	7.16515	226251	actin-binding LIM protein 1	protein_coding	mmu04360	Axon guidance	GO:0001725,GO:0003779,GO:0005515,GO:0005737,GO:0005856,GO:0006366,GO:0007010,GO:0007411,GO:0014069,GO:0015629,GO:0030027,GO:0030032,GO:0045944,GO:0046872,GO:0051015,GO:0060271	stress fiber|actin binding|protein binding|cytoplasm|cytoskeleton|transcription by RNA polymerase II|cytoskeleton organization|axon guidance|postsynaptic density|actin cytoskeleton|lamellipodium|lamellipodium assembly|positive regulation of transcription by RNA polymerase II|metal ion binding|actin filament binding|cilium assembly
Ablim2	167.812	147.391	188.233	1.27538	0.350932	0.214723	0.762521	Up	1.36515	0.934638	1.20736	0.758517	0.746992	1.31093	231148	actin-binding LIM protein 2	protein_coding	mmu04360	Axon guidance	GO:0003779,GO:0005737,GO:0006366,GO:0007010,GO:0015629,GO:0030016,GO:0030032,GO:0045944,GO:0046872,GO:0051015	actin binding|cytoplasm|transcription by RNA polymerase II|cytoskeleton organization|actin cytoskeleton|myofibril|lamellipodium assembly|positive regulation of transcription by RNA polymerase II|metal ion binding|actin filament binding
Ablim3	32.1068	22.7397	41.4739	1.82486	0.867786	0.120173	0.637895	Up	0.123838	0.213571	0.378838	0.185906	0.104544	0.100586	319713	actin binding LIM protein family%2C member 3	protein_coding	mmu04360	Axon guidance	GO:0001725,GO:0003779,GO:0005737,GO:0006366,GO:0007010,GO:0015629,GO:0030027,GO:0030032,GO:0045202,GO:0045944,GO:0046872,GO:0051015,GO:0060271,GO:0098978	stress fiber|actin binding|cytoplasm|transcription by RNA polymerase II|cytoskeleton organization|actin cytoskeleton|lamellipodium|lamellipodium assembly|synapse|positive regulation of transcription by RNA polymerase II|metal ion binding|actin filament binding|cilium assembly|glutamatergic synapse
Abo	32.0105	35.082	28.939	0.82351	-0.280142	0.651015	0.950756	Down	0.36367	0.566575	0.117244	0.316182	0.288544	0.699603	80908	ABO blood group (transferase A%2C alpha 1-3-N-acetylgalactosaminyltransferase%2C transferase B%2C alpha 1-3-galactosyltransferase)	protein_coding	mmu00601,mmu00603	Glycosphingolipid biosynthesis - lacto and neolacto series|Glycosphingolipid biosynthesis - globo and isoglobo series	GO:0000166,GO:0001962,GO:0003823,GO:0004380,GO:0004381,GO:0005576,GO:0005794,GO:0005975,GO:0009312,GO:0016020,GO:0016740,GO:0016757,GO:0016758,GO:0030145,GO:0030259,GO:0031982,GO:0046872	nucleotide binding|alpha-1,3-galactosyltransferase activity|antigen binding|glycoprotein-fucosylgalactoside alpha-N-acetylgalactosaminyltransferase activity|fucosylgalactoside 3-alpha-galactosyltransferase activity|extracellular region|Golgi apparatus|carbohydrate metabolic process|oligosaccharide biosynthetic process|membrane|transferase activity|glycosyltransferase activity|hexosyltransferase a…			R-MMU-1430728,R-MMU-71387,R-MMU-9033658,R-MMU-9033807	Metabolism|Metabolism of carbohydrates|Blood group systems biosynthesis|ABO blood group biosynthesis
Abr	1255.05	1190.39	1319.71	1.10877	0.148957	0.307644	0.82968	Up	3.71913	3.66076	4.20568	2.99741	3.75702	3.82282	109934	active BCR-related gene	protein_coding			GO:0002692,GO:0005085,GO:0005096,GO:0005829,GO:0005886,GO:0006909,GO:0007165,GO:0007420,GO:0016020,GO:0016477,GO:0030036,GO:0032496,GO:0035556,GO:0042472,GO:0042995,GO:0043114,GO:0043312,GO:0043314,GO:0043547,GO:0045202,GO:0050728,GO:0050766,GO:0050804,GO:0050885,GO:0051649,GO:0060313,GO:0090630,GO:0098685,GO:0098978,GO:0099092,GO:1905517,GO:1905522	negative regulation of cellular extravasation|guanyl-nucleotide exchange factor activity|GTPase activator activity|cytosol|plasma membrane|phagocytosis|signal transduction|brain development|membrane|cell migration|actin cytoskeleton organization|response to lipopolysaccharide|intracellular signal transduction|inner ear morphogenesis|cell projection|regulation of vascular permeability|neutrophil d…			R-MMU-162582,R-MMU-193648,R-MMU-193704,R-MMU-194315,R-MMU-204998,R-MMU-372790,R-MMU-388396,R-MMU-416482,R-MMU-73887,R-MMU-8980692,R-MMU-9012999,R-MMU-9013026,R-MMU-9013106,R-MMU-9013148,R-MMU-9013149,R-MMU-9013404,R-MMU-9013423,R-MMU-9716542	Signal Transduction|NRAGE signals death through JNK|p75 NTR receptor-mediated signalling|Signaling by Rho GTPases|Cell death signalling via NRAGE, NRIF and NADE|Signaling by GPCR|GPCR downstream signalling|G alpha (12/13) signalling events|Death Receptor Signaling|RHOA GTPase cycle|RHO GTPase cycle|RHOB GTPase cycle|RHOC GTPase cycle|CDC42 GTPase cycle|RAC1 GTPase cycle|RAC2 GTPase cycle|RAC3 GTP…
Abracl	1004.12	970.875	1037.37	1.06869	0.0958394	0.544716	0.928885	Up	29.3303	31.9977	38.3234	32.1263	31.4363	30.3348	73112	ABRA C-terminal like	protein_coding			GO:0003674,GO:0005575,GO:0032970	molecular_function|cellular_component|regulation of actin filament-based process
Abraxas1	284.48	303.348	265.612	0.875605	-0.191648	0.279228	0.809725	Down	2.35899	2.74213	2.15904	2.62409	2.71643	3.04219	70681	BRCA1 A complex subunit	protein_coding	mmu03440	Homologous recombination	GO:0005634,GO:0006281,GO:0006282,GO:0006302,GO:0006325,GO:0006974,GO:0007095,GO:0008017,GO:0008608,GO:0010212,GO:0016604,GO:0031593,GO:0044818,GO:0045739,GO:0070531,GO:0070536,GO:0090307	nucleus|DNA repair|regulation of DNA repair|double-strand break repair|chromatin organization|DNA damage response|mitotic G2 DNA damage checkpoint signaling|microtubule binding|attachment of spindle microtubules to kinetochore|response to ionizing radiation|nuclear body|polyubiquitin modification-dependent protein binding|mitotic G2/M transition checkpoint|positive regulation of DNA repair|BRCA1-…			R-MMU-1640170,R-MMU-392499,R-MMU-5688426,R-MMU-5689901,R-MMU-5693532,R-MMU-5693538,R-MMU-5693565,R-MMU-5693567,R-MMU-5693571,R-MMU-5693606,R-MMU-5693607,R-MMU-597592,R-MMU-69473,R-MMU-69481,R-MMU-69620,R-MMU-73894	Cell Cycle|Metabolism of proteins|Deubiquitination|Metalloprotease DUBs|DNA Double-Strand Break Repair|Homology Directed Repair|Recruitment and ATM-mediated phosphorylation of repair and signaling proteins at DNA double strand breaks|HDR through Homologous Recombination (HRR) or Single Strand Annealing (SSA)|Nonhomologous End-Joining (NHEJ)|DNA Double Strand Break Response|Processing of DNA doubl…
Abraxas2	2112.5	2223.39	2001.61	0.900151	-0.151761	0.24932	0.788035	Down	18.5874	21.419	18.5798	21.7874	19.155	24.936	109359	BRISC complex subunit	protein_coding			GO:0000278,GO:0002931,GO:0005515,GO:0005634,GO:0005737,GO:0005813,GO:0005856,GO:0005874,GO:0007049,GO:0007059,GO:0008017,GO:0008608,GO:0030496,GO:0031593,GO:0031616,GO:0036449,GO:0043066,GO:0051301,GO:0070536,GO:0070552,GO:0071497,GO:0090307	mitotic cell cycle|response to ischemia|protein binding|nucleus|cytoplasm|centrosome|cytoskeleton|microtubule|cell cycle|chromosome segregation|microtubule binding|attachment of spindle microtubules to kinetochore|midbody|polyubiquitin modification-dependent protein binding|spindle pole centrosome|microtubule minus-end|negative regulation of apoptotic process|cell division|protein K63-linked deub…			R-MMU-392499,R-MMU-5688426,R-MMU-5689901,R-MMU-597592	Metabolism of proteins|Deubiquitination|Metalloprotease DUBs|Post-translational protein modification
Abt1	661.838	682.208	641.467	0.940087	-0.0891345	0.54063	0.928539	Down	4.2054	3.70436	4.26602	4.32252	4.04696	4.74149	30946	activator of basal transcription 1	protein_coding			GO:0000447,GO:0000472,GO:0000480,GO:0003676,GO:0003677,GO:0003723,GO:0005634,GO:0005667,GO:0005730,GO:0006357,GO:0021522,GO:0034462	endonucleolytic cleavage in ITS1 to separate SSU-rRNA from 5.8S rRNA and LSU-rRNA from tricistronic rRNA transcript (SSU-rRNA, 5.8S rRNA, LSU-rRNA)|endonucleolytic cleavage to generate mature 5'-end of SSU-rRNA from (SSU-rRNA, 5.8S rRNA, LSU-rRNA)|endonucleolytic cleavage in 5'-ETS of tricistronic rRNA transcript (SSU-rRNA, 5.8S rRNA, LSU-rRNA)|nucleic acid binding|DNA binding|RNA binding|nucleus…
Abtb1	913.108	874.219	951.997	1.08855	0.122406	0.481811	0.912803	Up	11.9123	11.7172	13.2196	10.4125	9.37231	14.6758	80283	ankyrin repeat and BTB (POZ) domain containing 1	protein_coding			GO:0000151,GO:0003746,GO:0005730,GO:0005737,GO:0005829,GO:0005886,GO:0006412,GO:0006414	ubiquitin ligase complex|translation elongation factor activity|nucleolus|cytoplasm|cytosol|plasma membrane|translation|translational elongation
Abtb2	448.224	540.371	356.076	0.658883	-0.601907	0.0135942	0.217475	Down	2.22611	1.6751	2.70214	2.47906	3.52274	4.21243	99382	ankyrin repeat and BTB (POZ) domain containing 2	protein_coding			GO:0046982,GO:0097237	protein heterodimerization activity|cellular response to toxic substance
Abtb3	112.72	139.04	86.4006	0.62208	-0.684829	0.0814758	0.541189	Down	0.293059	0.463788	0.184201	0.481953	0.663208	0.364152	74007	ankyrin repeat and BTB domain containing 3	protein_coding			GO:0016020,GO:0046982,GO:0060395	membrane|protein heterodimerization activity|SMAD protein signal transduction
Acaa1a	2156.37	2097.63	2215.11	1.05595	0.0785398	0.686519	0.957651	Up	30.8993	25.2077	38.0754	24.6757	29.1326	36.9756	113868	acetyl-Coenzyme A acyltransferase 1A	protein_coding	mmu00071,mmu00592,mmu01040,mmu00280,mmu04146,mmu03320	Fatty acid degradation|alpha-Linolenic acid metabolism|Biosynthesis of unsaturated fatty acids|Valine, leucine and isoleucine degradation|Peroxisome|PPAR signaling pathway	GO:0000038,GO:0003985,GO:0003988,GO:0005739,GO:0005777,GO:0005782,GO:0006629,GO:0006631,GO:0006635,GO:0007584,GO:0008206,GO:0008775,GO:0010124,GO:0016401,GO:0016740,GO:0016746,GO:0016747,GO:0048545,GO:0050633	very long-chain fatty acid metabolic process|acetyl-CoA C-acetyltransferase activity|acetyl-CoA C-acyltransferase activity|mitochondrion|peroxisome|peroxisomal matrix|lipid metabolic process|fatty acid metabolic process|fatty acid beta-oxidation|response to nutrient|bile acid metabolic process|acetate CoA-transferase activity|phenylacetate catabolic process|palmitoyl-CoA oxidase activity|transfer…	WP4347,WP662,WP4348,WP2316	Eicosanoid metabolism via cyclooxygenases (COX)|Amino acid metabolism|Eicosanoid metabolism via lipoxygenases (LOX)|PPAR signaling pathway
Acaa1b	99.4899	77.1146	121.865	1.58007	0.659991	0.0694236	0.499632	Up	1.26506	1.26957	2.07383	1.35769	0.737363	0.825752	235674	acetyl-Coenzyme A acyltransferase 1B	protein_coding	mmu00071,mmu00592,mmu01040,mmu00280,mmu04146,mmu03320	Fatty acid degradation|alpha-Linolenic acid metabolism|Biosynthesis of unsaturated fatty acids|Valine, leucine and isoleucine degradation|Peroxisome|PPAR signaling pathway	GO:0000038,GO:0003985,GO:0003988,GO:0005739,GO:0005777,GO:0006629,GO:0006631,GO:0006635,GO:0008206,GO:0008775,GO:0010124,GO:0016401,GO:0016740,GO:0016746,GO:0016747,GO:0050633	very long-chain fatty acid metabolic process|acetyl-CoA C-acetyltransferase activity|acetyl-CoA C-acyltransferase activity|mitochondrion|peroxisome|lipid metabolic process|fatty acid metabolic process|fatty acid beta-oxidation|bile acid metabolic process|acetate CoA-transferase activity|phenylacetate catabolic process|palmitoyl-CoA oxidase activity|transferase activity|acyltransferase activity|ac…	WP2316	PPAR signaling pathway	R-MMU-1430728,R-MMU-168249,R-MMU-168256,R-MMU-2046104,R-MMU-2046106,R-MMU-390247,R-MMU-390918,R-MMU-556833,R-MMU-6798695,R-MMU-8978868,R-MMU-9033241,R-MMU-9609507	Metabolism|Innate Immune System|Immune System|alpha-linolenic (omega3) and linoleic (omega6) acid metabolism|alpha-linolenic acid (ALA) metabolism|Beta-oxidation of very long chain fatty acids|Peroxisomal lipid metabolism|Metabolism of lipids|Neutrophil degranulation|Fatty acid metabolism|Peroxisomal protein import|Protein localization
Acaa2	900.193	730.475	1069.91	1.46445	0.550361	0.00226589	0.0715695	Up	18.14	17.5576	24.6939	12.8902	12.7262	16.2043	52538	acetyl-Coenzyme A acyltransferase 2 (mitochondrial 3-oxoacyl-Coenzyme A thiolase)	protein_coding	mmu00062,mmu00071,mmu00280	Fatty acid elongation|Fatty acid degradation|Valine, leucine and isoleucine degradation	GO:0003985,GO:0003986,GO:0003988,GO:0005739,GO:0005743,GO:0005759,GO:0006084,GO:0006629,GO:0006631,GO:0006635,GO:0016290,GO:0016740,GO:0016746,GO:0016747,GO:0016787,GO:0047617,GO:0071456,GO:0102991,GO:1901029,GO:1902109	acetyl-CoA C-acetyltransferase activity|acetyl-CoA hydrolase activity|acetyl-CoA C-acyltransferase activity|mitochondrion|mitochondrial inner membrane|mitochondrial matrix|acetyl-CoA metabolic process|lipid metabolic process|fatty acid metabolic process|fatty acid beta-oxidation|palmitoyl-CoA hydrolase activity|transferase activity|acyltransferase activity|acyltransferase activity, transferring g…	WP336,WP2318	Fatty acid biosynthesis|Fatty acid oxidation	R-MMU-1430728,R-MMU-556833,R-MMU-77289,R-MMU-8978868	Metabolism|Metabolism of lipids|Mitochondrial Fatty Acid Beta-Oxidation|Fatty acid metabolism
Acaca	811.199	693.692	928.707	1.33915	0.421315	0.0113973	0.19396	Up	2.65482	2.20567	2.5107	1.86178	1.96766	1.71951	107476	acetyl-Coenzyme A carboxylase alpha	protein_coding	mmu00620,mmu00640,mmu00061,mmu04152,mmu04910,mmu04922,mmu04936	Pyruvate metabolism|Propanoate metabolism|Fatty acid biosynthesis|AMPK signaling pathway|Insulin signaling pathway|Glucagon signaling pathway|Alcoholic liver disease	GO:0000166,GO:0001650,GO:0001894,GO:0003824,GO:0003989,GO:0005515,GO:0005524,GO:0005737,GO:0005739,GO:0005829,GO:0006084,GO:0006629,GO:0006631,GO:0006633,GO:0008152,GO:0008610,GO:0009374,GO:0014070,GO:0015629,GO:0016874,GO:0019538,GO:0019900,GO:0042802,GO:0046872,GO:0051289,GO:0055088,GO:0071380	nucleotide binding|fibrillar center|tissue homeostasis|catalytic activity|acetyl-CoA carboxylase activity|protein binding|ATP binding|cytoplasm|mitochondrion|cytosol|acetyl-CoA metabolic process|lipid metabolic process|fatty acid metabolic process|fatty acid biosynthetic process|metabolic process|lipid biosynthetic process|biotin binding|response to organic cyclic compound|actin cytoskeleton|liga…	WP683,WP336,WP2841,WP3855	Leptin and adiponectin|Fatty acid biosynthesis|Focal adhesion: PI3K-Akt-mTOR signaling pathway|Dysregulated miRNA targeting in insulin/PI3K-AKT signaling	R-MMU-1430728,R-MMU-163685,R-MMU-163765,R-MMU-196780,R-MMU-196849,R-MMU-196854,R-MMU-200425,R-MMU-556833,R-MMU-75105,R-MMU-8978868	Metabolism|Integration of energy metabolism|ChREBP activates metabolic gene expression|Biotin transport and metabolism|Metabolism of water-soluble vitamins and cofactors|Metabolism of vitamins and cofactors|Carnitine metabolism|Metabolism of lipids|Fatty acyl-CoA biosynthesis|Fatty acid metabolism
Acacb	338.181	400.65	275.712	0.688356	-0.538772	0.0841135	0.548739	Down	0.867237	0.919362	0.511669	1.35876	1.21865	0.754309	100705	acetyl-Coenzyme A carboxylase beta	protein_coding	mmu00620,mmu00640,mmu00061,mmu04152,mmu04910,mmu04922,mmu04920,mmu04936,mmu04931	Pyruvate metabolism|Propanoate metabolism|Fatty acid biosynthesis|AMPK signaling pathway|Insulin signaling pathway|Glucagon signaling pathway|Adipocytokine signaling pathway|Alcoholic liver disease|Insulin resistance	GO:0000166,GO:0003824,GO:0003989,GO:0005524,GO:0005634,GO:0005739,GO:0006084,GO:0006629,GO:0006631,GO:0006633,GO:0008152,GO:0009374,GO:0010629,GO:0010884,GO:0010906,GO:0014070,GO:0016874,GO:0031667,GO:0031999,GO:0042802,GO:0043086,GO:0046322,GO:0046872,GO:0050995,GO:0051289,GO:0060421,GO:0097009,GO:2001295	nucleotide binding|catalytic activity|acetyl-CoA carboxylase activity|ATP binding|nucleus|mitochondrion|acetyl-CoA metabolic process|lipid metabolic process|fatty acid metabolic process|fatty acid biosynthetic process|metabolic process|biotin binding|negative regulation of gene expression|positive regulation of lipid storage|regulation of glucose metabolic process|response to organic cyclic compo…	WP336	Fatty acid biosynthesis	R-MMU-1430728,R-MMU-163685,R-MMU-163765,R-MMU-196780,R-MMU-196849,R-MMU-196854,R-MMU-200425,R-MMU-556833,R-MMU-8978868	Metabolism|Integration of energy metabolism|ChREBP activates metabolic gene expression|Biotin transport and metabolism|Metabolism of water-soluble vitamins and cofactors|Metabolism of vitamins and cofactors|Carnitine metabolism|Metabolism of lipids|Fatty acid metabolism
Acad10	258.437	273.728	243.147	0.887719	-0.171825	0.370773	0.865488	Down	1.90146	1.54795	1.82868	1.92394	1.80096	2.30814	71985	acyl-Coenzyme A dehydrogenase family%2C member 10	protein_coding			GO:0003995,GO:0005737,GO:0005739,GO:0016491,GO:0016627,GO:0033539,GO:0050660	acyl-CoA dehydrogenase activity|cytoplasm|mitochondrion|oxidoreductase activity|oxidoreductase activity, acting on the CH-CH group of donors|fatty acid beta-oxidation using acyl-CoA dehydrogenase|flavin adenine dinucleotide binding			R-MMU-1430728,R-MMU-556833,R-MMU-77289,R-MMU-8978868	Metabolism|Metabolism of lipids|Mitochondrial Fatty Acid Beta-Oxidation|Fatty acid metabolism
Acad11	1241.8	1194.89	1288.71	1.0782	0.108625	0.463866	0.907844	Up	10.7199	10.7453	11.2282	10.2696	8.43061	12.054	102632	acyl-Coenzyme A dehydrogenase family%2C member 11	protein_coding			GO:0003995,GO:0004466,GO:0005634,GO:0005737,GO:0005739,GO:0005777,GO:0006629,GO:0006631,GO:0016020,GO:0016491,GO:0016627,GO:0017099,GO:0031966,GO:0033539,GO:0050660,GO:0070991	acyl-CoA dehydrogenase activity|long-chain-acyl-CoA dehydrogenase activity|nucleus|cytoplasm|mitochondrion|peroxisome|lipid metabolic process|fatty acid metabolic process|membrane|oxidoreductase activity|oxidoreductase activity, acting on the CH-CH group of donors|very-long-chain-acyl-CoA dehydrogenase activity|mitochondrial membrane|fatty acid beta-oxidation using acyl-CoA dehydrogenase|flavin a…			R-MMU-1430728,R-MMU-556833,R-MMU-77289,R-MMU-8978868	Metabolism|Metabolism of lipids|Mitochondrial Fatty Acid Beta-Oxidation|Fatty acid metabolism
Acad12	174.17	200.12	148.219	0.740648	-0.43314	0.159204	0.703139	Down	1.91384	1.66052	1.60386	1.34866	2.76364	3.02503	338350	acyl-Coenzyme A dehydrogenase family%2C member 12	protein_coding			GO:0003995,GO:0005737,GO:0005739,GO:0033539	acyl-CoA dehydrogenase activity|cytoplasm|mitochondrion|fatty acid beta-oxidation using acyl-CoA dehydrogenase
Acad8	713.555	680.649	746.462	1.09618	0.132488	0.401202	0.881906	Up	7.59929	7.33811	6.73091	6.36161	5.70334	8.00772	66948	acyl-Coenzyme A dehydrogenase family%2C member 8	protein_coding	mmu00280	Valine, leucine and isoleucine degradation	GO:0003995,GO:0005739,GO:0006629,GO:0009083,GO:0016491,GO:0016627,GO:0050660	acyl-CoA dehydrogenase activity|mitochondrion|lipid metabolic process|branched-chain amino acid catabolic process|oxidoreductase activity|oxidoreductase activity, acting on the CH-CH group of donors|flavin adenine dinucleotide binding			R-MMU-1430728,R-MMU-70895,R-MMU-71291	Metabolism|Branched-chain amino acid catabolism|Metabolism of amino acids and derivatives
Acad9	818.281	828.813	807.749	0.974307	-0.0375514	0.826196	0.982143	Down	5.97943	6.44312	4.96414	5.40516	5.34106	7.3838	229211	acyl-Coenzyme A dehydrogenase family%2C member 9	protein_coding			GO:0001676,GO:0003995,GO:0004466,GO:0005634,GO:0005739,GO:0005743,GO:0016020,GO:0016491,GO:0016627,GO:0030425,GO:0031966,GO:0032981,GO:0050660,GO:0051791,GO:0070991	long-chain fatty acid metabolic process|acyl-CoA dehydrogenase activity|long-chain-acyl-CoA dehydrogenase activity|nucleus|mitochondrion|mitochondrial inner membrane|membrane|oxidoreductase activity|oxidoreductase activity, acting on the CH-CH group of donors|dendrite|mitochondrial membrane|mitochondrial respiratory chain complex I assembly|flavin adenine dinucleotide binding|medium-chain fatty a…			R-MMU-1428517,R-MMU-1430728,R-MMU-163200,R-MMU-611105,R-MMU-6799198	The citric acid (TCA) cycle and respiratory electron transport|Metabolism|Respiratory electron transport, ATP synthesis by chemiosmotic coupling, and heat production by uncoupling proteins.|Respiratory electron transport|Complex I biogenesis
Acadl	2401.03	2445.21	2356.85	0.963772	-0.0532363	0.67344	0.956026	Down	34.1931	34.4499	33.7779	31.5034	33.9296	42.448	11363	acyl-Coenzyme A dehydrogenase%2C long-chain	protein_coding	mmu00071,mmu03320	Fatty acid degradation|PPAR signaling pathway	GO:0000062,GO:0001659,GO:0003995,GO:0004466,GO:0005737,GO:0005739,GO:0005759,GO:0006629,GO:0006631,GO:0009062,GO:0009409,GO:0016401,GO:0016491,GO:0016627,GO:0019254,GO:0031966,GO:0033539,GO:0042413,GO:0042758,GO:0042802,GO:0044242,GO:0045717,GO:0046322,GO:0050660,GO:0090181,GO:0120162	fatty-acyl-CoA binding|temperature homeostasis|acyl-CoA dehydrogenase activity|long-chain-acyl-CoA dehydrogenase activity|cytoplasm|mitochondrion|mitochondrial matrix|lipid metabolic process|fatty acid metabolic process|fatty acid catabolic process|response to cold|palmitoyl-CoA oxidase activity|oxidoreductase activity|oxidoreductase activity, acting on the CH-CH group of donors|carnitine metabol…	WP401,WP1269,WP2316	Mitochondrial long chain fatty acid beta-oxidation|Fatty acid beta-oxidation|PPAR signaling pathway	R-MMU-1430728,R-MMU-556833,R-MMU-77285,R-MMU-77286,R-MMU-77289,R-MMU-77310,R-MMU-8978868	Metabolism|Metabolism of lipids|Beta oxidation of myristoyl-CoA to lauroyl-CoA|mitochondrial fatty acid beta-oxidation of saturated fatty acids|Mitochondrial Fatty Acid Beta-Oxidation|Beta oxidation of lauroyl-CoA to decanoyl-CoA-CoA|Fatty acid metabolism
Acadm	6466.44	6526.76	6406.12	0.981523	-0.0269061	0.834144	0.983729	Down	81.2148	83.2745	98.6067	81.5389	90.0552	99.7224	11364	acyl-Coenzyme A dehydrogenase%2C medium chain	protein_coding	mmu00071,mmu00280,mmu03320,mmu04936	Fatty acid degradation|Valine, leucine and isoleucine degradation|PPAR signaling pathway|Alcoholic liver disease	GO:0000062,GO:0001889,GO:0003995,GO:0005737,GO:0005739,GO:0005759,GO:0005978,GO:0006082,GO:0006111,GO:0006629,GO:0006631,GO:0006635,GO:0007507,GO:0009409,GO:0009437,GO:0009791,GO:0016491,GO:0016627,GO:0016853,GO:0019254,GO:0030424,GO:0031966,GO:0033539,GO:0042594,GO:0042802,GO:0045329,GO:0050660,GO:0051791,GO:0051793,GO:0055007,GO:0070991	fatty-acyl-CoA binding|liver development|acyl-CoA dehydrogenase activity|cytoplasm|mitochondrion|mitochondrial matrix|glycogen biosynthetic process|organic acid metabolic process|regulation of gluconeogenesis|lipid metabolic process|fatty acid metabolic process|fatty acid beta-oxidation|heart development|response to cold|carnitine metabolic process|post-embryonic development|oxidoreductase activi…	WP401,WP1269,WP662,WP2318,WP2316	Mitochondrial long chain fatty acid beta-oxidation|Fatty acid beta-oxidation|Amino acid metabolism|Fatty acid oxidation|PPAR signaling pathway	R-MMU-1430728,R-MMU-556833,R-MMU-77286,R-MMU-77288,R-MMU-77289,R-MMU-77346,R-MMU-77348,R-MMU-8978868	Metabolism|Metabolism of lipids|mitochondrial fatty acid beta-oxidation of saturated fatty acids|mitochondrial fatty acid beta-oxidation of unsaturated fatty acids|Mitochondrial Fatty Acid Beta-Oxidation|Beta oxidation of decanoyl-CoA to octanoyl-CoA-CoA|Beta oxidation of octanoyl-CoA to hexanoyl-CoA|Fatty acid metabolism
Acads	1716.49	1640.58	1792.4	1.09254	0.127689	0.510737	0.91942	Up	26.3642	21.5056	33.193	20.7456	25.9041	28.671	11409	acyl-Coenzyme A dehydrogenase%2C short chain	protein_coding	mmu00640,mmu00650,mmu00071,mmu00280,mmu00410	Propanoate metabolism|Butanoate metabolism|Fatty acid degradation|Valine, leucine and isoleucine degradation|beta-Alanine metabolism	GO:0000062,GO:0003995,GO:0004085,GO:0005654,GO:0005739,GO:0005759,GO:0005813,GO:0006629,GO:0006631,GO:0016491,GO:0016627,GO:0016937,GO:0031966,GO:0033539,GO:0042802,GO:0046359,GO:0050660	fatty-acyl-CoA binding|acyl-CoA dehydrogenase activity|butyryl-CoA dehydrogenase activity|nucleoplasm|mitochondrion|mitochondrial matrix|centrosome|lipid metabolic process|fatty acid metabolic process|oxidoreductase activity|oxidoreductase activity, acting on the CH-CH group of donors|short-chain-acyl-CoA dehydrogenase activity|mitochondrial membrane|fatty acid beta-oxidation using acyl-CoA dehyd…	WP401,WP1269,WP2318	Mitochondrial long chain fatty acid beta-oxidation|Fatty acid beta-oxidation|Fatty acid oxidation	R-MMU-1430728,R-MMU-556833,R-MMU-77286,R-MMU-77289,R-MMU-77350,R-MMU-77352,R-MMU-8978868	Metabolism|Metabolism of lipids|mitochondrial fatty acid beta-oxidation of saturated fatty acids|Mitochondrial Fatty Acid Beta-Oxidation|Beta oxidation of hexanoyl-CoA to butanoyl-CoA|Beta oxidation of butanoyl-CoA to acetyl-CoA|Fatty acid metabolism
Acadsb	2095.26	1973.54	2216.98	1.12319	0.167606	0.222	0.770842	Up	19.7948	19.4165	16.8235	16.6461	14.8891	19.0176	66885	acyl-Coenzyme A dehydrogenase%2C short/branched chain	protein_coding	mmu00071,mmu00280	Fatty acid degradation|Valine, leucine and isoleucine degradation	GO:0003853,GO:0003995,GO:0005739,GO:0006550,GO:0006629,GO:0006631,GO:0006637,GO:0009055,GO:0016491,GO:0016627,GO:0016937,GO:0042802,GO:0050660,GO:0102035	2-methylacyl-CoA dehydrogenase activity|acyl-CoA dehydrogenase activity|mitochondrion|isoleucine catabolic process|lipid metabolic process|fatty acid metabolic process|acyl-CoA metabolic process|electron transfer activity|oxidoreductase activity|oxidoreductase activity, acting on the CH-CH group of donors|short-chain-acyl-CoA dehydrogenase activity|identical protein binding|flavin adenine dinucle…			R-MMU-1430728,R-MMU-70895,R-MMU-71291	Metabolism|Branched-chain amino acid catabolism|Metabolism of amino acids and derivatives
Acadvl	2099.58	1947.49	2251.68	1.15628	0.20949	0.0625752	0.478246	Up	28.1029	28.6367	30.3941	23.6632	25.7033	26.802	11370	acyl-Coenzyme A dehydrogenase%2C very long chain	protein_coding	mmu00071,mmu04936	Fatty acid degradation|Alcoholic liver disease	GO:0000062,GO:0001659,GO:0003995,GO:0004466,GO:0005654,GO:0005730,GO:0005739,GO:0005743,GO:0006629,GO:0006631,GO:0006635,GO:0009062,GO:0009409,GO:0016020,GO:0016491,GO:0016627,GO:0017099,GO:0031966,GO:0033539,GO:0042645,GO:0042802,GO:0045717,GO:0046322,GO:0050660,GO:0090181	fatty-acyl-CoA binding|temperature homeostasis|acyl-CoA dehydrogenase activity|long-chain-acyl-CoA dehydrogenase activity|nucleoplasm|nucleolus|mitochondrion|mitochondrial inner membrane|lipid metabolic process|fatty acid metabolic process|fatty acid beta-oxidation|fatty acid catabolic process|response to cold|membrane|oxidoreductase activity|oxidoreductase activity, acting on the CH-CH group of …	WP401,WP1269,WP2318	Mitochondrial long chain fatty acid beta-oxidation|Fatty acid beta-oxidation|Fatty acid oxidation	R-MMU-1430728,R-MMU-556833,R-MMU-77286,R-MMU-77289,R-MMU-77305,R-MMU-8978868	Metabolism|Metabolism of lipids|mitochondrial fatty acid beta-oxidation of saturated fatty acids|Mitochondrial Fatty Acid Beta-Oxidation|Beta oxidation of palmitoyl-CoA to myristoyl-CoA|Fatty acid metabolism
Acan	41.0071	10.3763	71.6378	6.91371	2.78946	0.00201977	0.0664539	Up	0.0276071	0.692163	0.0791139	0.0320029	0.0455605	0.0370918	11595	aggrecan	protein_coding			GO:0001501,GO:0001502,GO:0002052,GO:0002063,GO:0005509,GO:0005515,GO:0005540,GO:0005576,GO:0005604,GO:0005615,GO:0007155,GO:0007417,GO:0007507,GO:0010001,GO:0030166,GO:0030199,GO:0030246,GO:0030336,GO:0031012,GO:0043025,GO:0045202,GO:0046872,GO:0072534,GO:0098966,GO:0098978,GO:0098982	skeletal system development|cartilage condensation|positive regulation of neuroblast proliferation|chondrocyte development|calcium ion binding|protein binding|hyaluronic acid binding|extracellular region|basement membrane|extracellular space|cell adhesion|central nervous system development|heart development|glial cell differentiation|proteoglycan biosynthetic process|collagen fibril organization|…	WP1270,WP2432	Endochondral ossification|Spinal cord injury	R-MMU-1430728,R-MMU-1474228,R-MMU-1474244,R-MMU-1630316,R-MMU-1638074,R-MMU-2022854,R-MMU-2022857,R-MMU-3000178,R-MMU-71387	Metabolism|Degradation of the extracellular matrix|Extracellular matrix organization|Glycosaminoglycan metabolism|Keratan sulfate/keratin metabolism|Keratan sulfate biosynthesis|Keratan sulfate degradation|ECM proteoglycans|Metabolism of carbohydrates
Acap1	34.4691	25.8738	43.0644	1.66191	0.732845	0.0966539	0.585488	Up	0.416767	0.364077	0.603803	0.216066	0.25719	0.376129	216859	ArfGAP with coiled-coil%2C ankyrin repeat and PH domains 1	protein_coding	mmu04144	Endocytosis	GO:0003674,GO:0005096,GO:0005737,GO:0005768,GO:0006629,GO:0007165,GO:0008150,GO:0016020,GO:0016042,GO:0046872	molecular_function|GTPase activator activity|cytoplasm|endosome|lipid metabolic process|signal transduction|biological_process|membrane|lipid catabolic process|metal ion binding
Acap2	2188.06	2204.04	2172.07	0.985394	-0.0212277	0.872808	0.987502	Down	4.12569	4.31884	3.58432	3.95271	3.75124	4.66235	78618	ArfGAP with coiled-coil%2C ankyrin repeat and PH domains 2	protein_coding	mmu04144	Endocytosis	GO:0001726,GO:0005096,GO:0005515,GO:0005737,GO:0005768,GO:0010008,GO:0016020,GO:0030029,GO:0031267,GO:0032456,GO:0046872,GO:0080025,GO:1990090	ruffle|GTPase activator activity|protein binding|cytoplasm|endosome|endosome membrane|membrane|actin filament-based process|small GTPase binding|endocytic recycling|metal ion binding|phosphatidylinositol-3,5-bisphosphate binding|cellular response to nerve growth factor stimulus
Acap3	382.037	407.988	356.086	0.873018	-0.195917	0.262562	0.800024	Down	1.86747	2.30095	2.561	2.49624	2.56468	2.71725	140500	ArfGAP with coiled-coil%2C ankyrin repeat and PH domains 3	protein_coding	mmu04144	Endocytosis	GO:0001764,GO:0005096,GO:0010975,GO:0030426	neuron migration|GTPase activator activity|regulation of neuron projection development|growth cone
Acat1	2656.47	2139.97	3172.96	1.48259	0.568119	2.1091e-06	0.00039279	Up	24.7882	26.3658	28.5231	16.8893	16.89	20.6608	110446	acetyl-Coenzyme A acetyltransferase 1	protein_coding	mmu00620,mmu00630,mmu00650,mmu00071,mmu00280,mmu00310,mmu00380,mmu00900,mmu04975	Pyruvate metabolism|Glyoxylate and dicarboxylate metabolism|Butanoate metabolism|Fatty acid degradation|Valine, leucine and isoleucine degradation|Lysine degradation|Tryptophan metabolism|Terpenoid backbone biosynthesis|Fat digestion and absorption	GO:0003985,GO:0005739,GO:0005743,GO:0005759,GO:0005783,GO:0006085,GO:0006550,GO:0006629,GO:0006631,GO:0006635,GO:0015936,GO:0015937,GO:0016453,GO:0016740,GO:0016746,GO:0016747,GO:0019899,GO:0030955,GO:0034736,GO:0042802,GO:0046356,GO:0046872,GO:0046952,GO:0120225,GO:1902860	acetyl-CoA C-acetyltransferase activity|mitochondrion|mitochondrial inner membrane|mitochondrial matrix|endoplasmic reticulum|acetyl-CoA biosynthetic process|isoleucine catabolic process|lipid metabolic process|fatty acid metabolic process|fatty acid beta-oxidation|coenzyme A metabolic process|coenzyme A biosynthetic process|C-acetyltransferase activity|transferase activity|acyltransferase activi…	WP543,WP79,WP4346,WP1269	Synthesis and degradation of ketone bodies|Tryptophan metabolism|Cholesterol metabolism with Bloch and Kandutsch-Russell pathways|Fatty acid beta-oxidation	R-MMU-1430728,R-MMU-556833,R-MMU-70895,R-MMU-71291,R-MMU-74182,R-MMU-77108,R-MMU-77111	Metabolism|Metabolism of lipids|Branched-chain amino acid catabolism|Metabolism of amino acids and derivatives|Ketone body metabolism|Utilization of Ketone Bodies|Synthesis of Ketone Bodies
Acat2	516.604	461.561	571.647	1.23916	0.309357	0.228747	0.774311	Up	6.35532	6.71531	10.2608	5.22855	8.04744	5.65964	110460	acetyl-Coenzyme A acetyltransferase 2	protein_coding	mmu00620,mmu00630,mmu00650,mmu00071,mmu00280,mmu00310,mmu00380,mmu00900,mmu04975	Pyruvate metabolism|Glyoxylate and dicarboxylate metabolism|Butanoate metabolism|Fatty acid degradation|Valine, leucine and isoleucine degradation|Lysine degradation|Tryptophan metabolism|Terpenoid backbone biosynthesis|Fat digestion and absorption	GO:0003985,GO:0005737,GO:0005739,GO:0006635,GO:0016740,GO:0016746,GO:0016747,GO:0045797	acetyl-CoA C-acetyltransferase activity|cytoplasm|mitochondrion|fatty acid beta-oxidation|transferase activity|acyltransferase activity|acyltransferase activity, transferring groups other than amino-acyl groups|positive regulation of intestinal cholesterol absorption	WP4346	Cholesterol metabolism with Bloch and Kandutsch-Russell pathways	R-MMU-1430728,R-MMU-191273,R-MMU-556833,R-MMU-8957322	Metabolism|Cholesterol biosynthesis|Metabolism of lipids|Metabolism of steroids
Acat3	28.1784	35.447	20.9098	0.590927	-0.758948	0.208106	0.757414	Down	0.128567	0.231871	0.472825	0.266613	0.634715	0.525191	224530	acetyl-Coenzyme A acetyltransferase 3	protein_coding	mmu00620,mmu00630,mmu00650,mmu00071,mmu00280,mmu00310,mmu00380,mmu00900,mmu04975	Pyruvate metabolism|Glyoxylate and dicarboxylate metabolism|Butanoate metabolism|Fatty acid degradation|Valine, leucine and isoleucine degradation|Lysine degradation|Tryptophan metabolism|Terpenoid backbone biosynthesis|Fat digestion and absorption	GO:0003985,GO:0005737,GO:0005739,GO:0006635	acetyl-CoA C-acetyltransferase activity|cytoplasm|mitochondrion|fatty acid beta-oxidation
Acbd3	3598.01	3566.3	3629.71	1.01784	0.0255149	0.826317	0.982143	Up	29.5837	30.1276	28.8183	29.4412	29.4562	28.7989	170760	acyl-Coenzyme A binding domain containing 3	protein_coding	mmu05132	Salmonella infection	GO:0000062,GO:0000139,GO:0005739,GO:0005794,GO:0006629,GO:0006694,GO:0016020,GO:0034237	fatty-acyl-CoA binding|Golgi membrane|mitochondrion|Golgi apparatus|lipid metabolic process|steroid biosynthetic process|membrane|protein kinase A regulatory subunit binding			R-MMU-199991,R-MMU-199992,R-MMU-432722,R-MMU-5653656	Membrane Trafficking|trans-Golgi Network Vesicle Budding|Golgi Associated Vesicle Biogenesis|Vesicle-mediated transport
Acbd5	2461.81	2433.59	2490.03	1.02312	0.0329738	0.774263	0.971854	Up	18.8933	17.4969	18.0574	16.9289	17.1252	19.8571	74159	acyl-Coenzyme A binding domain containing 5	protein_coding			GO:0000062,GO:0005654,GO:0005737,GO:0005777,GO:0006631,GO:0006914,GO:0008289,GO:0016020,GO:0030242	fatty-acyl-CoA binding|nucleoplasm|cytoplasm|peroxisome|fatty acid metabolic process|autophagy|lipid binding|membrane|autophagy of peroxisome			R-MMU-1430728,R-MMU-162582,R-MMU-194315,R-MMU-390918,R-MMU-556833,R-MMU-8978868,R-MMU-8980692,R-MMU-9012999,R-MMU-9013106,R-MMU-9603798,R-MMU-9609507,R-MMU-9716542	Metabolism|Signal Transduction|Signaling by Rho GTPases|Peroxisomal lipid metabolism|Metabolism of lipids|Fatty acid metabolism|RHOA GTPase cycle|RHO GTPase cycle|RHOC GTPase cycle|Class I peroxisomal membrane protein import|Protein localization|Signaling by Rho GTPases, Miro GTPases and RHOBTB3
Acbd6	667.238	656.747	677.729	1.03149	0.0447253	0.762826	0.96934	Up	5.9742	6.00275	5.93487	5.82048	4.99609	6.78342	72482	acyl-Coenzyme A binding domain containing 6	protein_coding			GO:0000062,GO:0003674,GO:0005737,GO:0008150,GO:0008289	fatty-acyl-CoA binding|molecular_function|cytoplasm|biological_process|lipid binding			R-MMU-1430728,R-MMU-556833,R-MMU-77289,R-MMU-8978868	Metabolism|Metabolism of lipids|Mitochondrial Fatty Acid Beta-Oxidation|Fatty acid metabolism
Acbd7	17.6649	19.0986	16.2312	0.848657	-0.236747	0.727147	0.96572	Down	0.297634	0.490655	0.895581	0.362278	0.562037	1.11333	78245	acyl-Coenzyme A binding domain containing 7	protein_coding			GO:0000062,GO:0005575,GO:0006631,GO:0008289	fatty-acyl-CoA binding|cellular_component|fatty acid metabolic process|lipid binding			R-MMU-1430728,R-MMU-556833,R-MMU-77289,R-MMU-8978868	Metabolism|Metabolism of lipids|Mitochondrial Fatty Acid Beta-Oxidation|Fatty acid metabolism
Accs	102.809	114.137	91.4815	0.800254	-0.32147	0.326189	0.84165	Down	0.360423	0.449636	0.429896	0.48613	0.333268	0.762068	329470	1-aminocyclopropane-1-carboxylate synthase (non-functional)	protein_coding			GO:0003824,GO:0005575,GO:0006520,GO:0008483,GO:0009058,GO:0030170,GO:0042802	catalytic activity|cellular_component|amino acid metabolic process|transaminase activity|biosynthetic process|pyridoxal phosphate binding|identical protein binding
Accsl	7.04813	9.37914	4.71711	0.500305	-0.999121	0.335822	0.845218	Down	0.0505312	0.020505	0.0608193	0.0984098	0.0179615	0.155534	381411	1-aminocyclopropane-1-carboxylate synthase (non-functional)-like	protein_coding			GO:0003824,GO:0005575,GO:0006520,GO:0008483,GO:0009058,GO:0030170	catalytic activity|cellular_component|amino acid metabolic process|transaminase activity|biosynthetic process|pyridoxal phosphate binding
Acd	426.697	415.61	437.785	1.05384	0.075651	0.632824	0.946787	Up	7.10468	7.63146	8.38351	6.96752	7.73145	7.43876	497652	adrenocortical dysplasia	protein_coding			GO:0000723,GO:0000781,GO:0000783,GO:0001501,GO:0001655,GO:0003677,GO:0005515,GO:0005634,GO:0005654,GO:0005694,GO:0005697,GO:0006886,GO:0007004,GO:0016233,GO:0016604,GO:0030326,GO:0031848,GO:0032202,GO:0032206,GO:0032211,GO:0032212,GO:0035282,GO:0042162,GO:0044877,GO:0051973,GO:0060381,GO:0070182,GO:0070187,GO:0070198,GO:0070200	telomere maintenance|chromosome, telomeric region|nuclear telomere cap complex|skeletal system development|urogenital system development|DNA binding|protein binding|nucleus|nucleoplasm|chromosome|telomerase holoenzyme complex|intracellular protein transport|telomere maintenance via telomerase|telomere capping|nuclear body|embryonic limb morphogenesis|protection from non-homologous end joining at …			R-MMU-157579,R-MMU-1640170,R-MMU-171319,R-MMU-174411,R-MMU-174414,R-MMU-174417,R-MMU-174430,R-MMU-174437,R-MMU-180786,R-MMU-73886	Telomere Maintenance|Cell Cycle|Telomere Extension By Telomerase|Polymerase switching on the C-strand of the telomere|Processive synthesis on the C-strand of the telomere|Telomere C-strand (Lagging Strand) Synthesis|Telomere C-strand synthesis initiation|Removal of the Flap Intermediate from the C-strand|Extension of Telomeres|Chromosome Maintenance
Ace	3745.77	3346.17	4145.36	1.23889	0.309051	0.0464797	0.410425	Up	22.3399	19.1716	24.6027	15.5403	19.4384	19.0366	11421	angiotensin I converting enzyme (peptidyl-dipeptidase A) 1	protein_coding	mmu04924,mmu04614,mmu05171,mmu05142,mmu05410,mmu05415	Renin secretion|Renin-angiotensin system|Coronavirus disease - COVID-19|Chagas disease|Hypertrophic cardiomyopathy|Diabetic cardiomyopathy	GO:0001822,GO:0002003,GO:0002446,GO:0003081,GO:0003084,GO:0003779,GO:0004175,GO:0004180,GO:0004222,GO:0005515,GO:0005516,GO:0005576,GO:0005615,GO:0005737,GO:0005764,GO:0005768,GO:0005886,GO:0006508,GO:0006518,GO:0007283,GO:0008217,GO:0008233,GO:0008237,GO:0008238,GO:0008240,GO:0008241,GO:0008270,GO:0008584,GO:0009792,GO:0009897,GO:0009925,GO:0010608,GO:0010629,GO:0010814,GO:0010815,GO:0014910,GO:…	kidney development|angiotensin maturation|neutrophil mediated immunity|regulation of systemic arterial blood pressure by renin-angiotensin|positive regulation of systemic arterial blood pressure|actin binding|endopeptidase activity|carboxypeptidase activity|metalloendopeptidase activity|protein binding|calmodulin binding|extracellular region|extracellular space|cytoplasm|lysosome|endosome|plasma …	WP396,WP4965	ACE inhibitor pathway|Deregulation of renin-angiotensin system by SARS-CoV infection	R-MMU-2022377,R-MMU-2980736,R-MMU-392499	Metabolism of Angiotensinogen to Angiotensins|Peptide hormone metabolism|Metabolism of proteins
Ace2	3496.45	3009.42	3983.47	1.32359	0.404453	0.0258346	0.302249	Up	31.3982	36.2879	24.9021	25.3835	19.2844	26.059	70008	angiotensin I converting enzyme (peptidyl-dipeptidase A) 2	protein_coding	mmu04614,mmu04974,mmu05171	Renin-angiotensin system|Protein digestion and absorption|Coronavirus disease - COVID-19	GO:0001618,GO:0003051,GO:0003081,GO:0004175,GO:0004180,GO:0004181,GO:0005515,GO:0005576,GO:0005615,GO:0005737,GO:0005886,GO:0006508,GO:0008233,GO:0008237,GO:0008241,GO:0009986,GO:0015827,GO:0016020,GO:0016324,GO:0016787,GO:0022898,GO:0031526,GO:0042802,GO:0042995,GO:0046718,GO:0046813,GO:0046872,GO:0048662,GO:0051957,GO:0060452,GO:0070373,GO:0098670,GO:1903598,GO:1903779,GO:1905737,GO:2000272	virus receptor activity|angiotensin-mediated drinking behavior|regulation of systemic arterial blood pressure by renin-angiotensin|endopeptidase activity|carboxypeptidase activity|metallocarboxypeptidase activity|protein binding|extracellular region|extracellular space|cytoplasm|plasma membrane|proteolysis|peptidase activity|metallopeptidase activity|peptidyl-dipeptidase activity|cell surface|try…	WP4965	Deregulation of renin-angiotensin system by SARS-CoV infection	R-MMU-2022377,R-MMU-2980736,R-MMU-392499	Metabolism of Angiotensinogen to Angiotensins|Peptide hormone metabolism|Metabolism of proteins
Ace3	12.6519	5.38629	19.9175	3.68056	1.87992	0.0130845	0.212389	Up	0.139067	0.133654	0.132143	0.0653327	0.0130084	0.0312898	217246	angiotensin I converting enzyme (peptidyl-dipeptidase A) 3	protein_coding	mmu04924,mmu04614,mmu05171,mmu05142,mmu05410,mmu05415	Renin secretion|Renin-angiotensin system|Coronavirus disease - COVID-19|Chagas disease|Hypertrophic cardiomyopathy|Diabetic cardiomyopathy	GO:0001669,GO:0003081,GO:0003084,GO:0005515,GO:0005886,GO:0006508,GO:0008237,GO:0008241,GO:0016020,GO:0031410,GO:0046872	acrosomal vesicle|regulation of systemic arterial blood pressure by renin-angiotensin|positive regulation of systemic arterial blood pressure|protein binding|plasma membrane|proteolysis|metallopeptidase activity|peptidyl-dipeptidase activity|membrane|cytoplasmic vesicle|metal ion binding
Acer1	4.29106	0	8.58213	51.294	5.68072	0.0306259	0.329654	Up	0	0.305422	0	0	0	0	171168	alkaline ceramidase 1	protein_coding	mmu00600,mmu04071	Sphingolipid metabolism|Sphingolipid signaling pathway	GO:0005783,GO:0006629,GO:0006665,GO:0006672,GO:0010446,GO:0016020,GO:0016787,GO:0016811,GO:0017040,GO:0019216,GO:0030148,GO:0030154,GO:0046512,GO:0046514,GO:0046872,GO:0048733,GO:0071277,GO:0071633,GO:0102121	endoplasmic reticulum|lipid metabolic process|sphingolipid metabolic process|ceramide metabolic process|response to alkaline pH|membrane|hydrolase activity|hydrolase activity, acting on carbon-nitrogen (but not peptide) bonds, in linear amides|N-acylsphingosine amidohydrolase activity|regulation of lipid metabolic process|sphingolipid biosynthetic process|cell differentiation|sphingosine biosynth…			R-MMU-1430728,R-MMU-1660661,R-MMU-428157,R-MMU-556833	Metabolism|Sphingolipid de novo biosynthesis|Sphingolipid metabolism|Metabolism of lipids
Acer2	4279.7	4056.76	4502.64	1.10982	0.150329	0.524212	0.924436	Up	17.6162	21.6431	14.7703	15.1279	11.2386	23.356	230379	alkaline ceramidase 2	protein_coding	mmu00600,mmu04071	Sphingolipid metabolism|Sphingolipid signaling pathway	GO:0000139,GO:0001953,GO:0005794,GO:0006629,GO:0006665,GO:0006672,GO:0006919,GO:0006974,GO:0008284,GO:0010506,GO:0016020,GO:0016787,GO:0016811,GO:0017040,GO:0030330,GO:0032526,GO:0033629,GO:0042981,GO:0046512,GO:0046514,GO:0046872,GO:0060049,GO:0071633,GO:0102121	Golgi membrane|negative regulation of cell-matrix adhesion|Golgi apparatus|lipid metabolic process|sphingolipid metabolic process|ceramide metabolic process|activation of cysteine-type endopeptidase activity involved in apoptotic process|DNA damage response|positive regulation of cell population proliferation|regulation of autophagy|membrane|hydrolase activity|hydrolase activity, acting on carbon…			R-MMU-1430728,R-MMU-1660661,R-MMU-428157,R-MMU-556833	Metabolism|Sphingolipid de novo biosynthesis|Sphingolipid metabolism|Metabolism of lipids
Acer3	791.899	718.862	864.935	1.20265	0.266219	0.186801	0.732256	Up	5.68422	6.44964	5.28003	4.82405	3.57122	6.33343	66190	alkaline ceramidase 3	protein_coding	mmu00600	Sphingolipid metabolism	GO:0000139,GO:0005509,GO:0005783,GO:0005789,GO:0005794,GO:0006629,GO:0006665,GO:0006672,GO:0006954,GO:0008270,GO:0008284,GO:0016020,GO:0016787,GO:0016811,GO:0017040,GO:0042552,GO:0043067,GO:0046512,GO:0046514,GO:0046872,GO:0070774,GO:0071602,GO:0071633,GO:0102121	Golgi membrane|calcium ion binding|endoplasmic reticulum|endoplasmic reticulum membrane|Golgi apparatus|lipid metabolic process|sphingolipid metabolic process|ceramide metabolic process|inflammatory response|zinc ion binding|positive regulation of cell population proliferation|membrane|hydrolase activity|hydrolase activity, acting on carbon-nitrogen (but not peptide) bonds, in linear amides|N-acy…			R-MMU-1430728,R-MMU-1660661,R-MMU-428157,R-MMU-556833	Metabolism|Sphingolipid de novo biosynthesis|Sphingolipid metabolism|Metabolism of lipids
Ache	149.759	180.206	119.313	0.661657	-0.595845	0.0652858	0.485426	Down	0.910871	0.814535	0.507557	0.782936	1.08524	1.58642	11423	acetylcholinesterase	protein_coding	mmu00564,mmu04725	Glycerophospholipid metabolism|Cholinergic synapse	GO:0001919,GO:0003990,GO:0004104,GO:0005515,GO:0005518,GO:0005576,GO:0005604,GO:0005615,GO:0005635,GO:0005788,GO:0005794,GO:0005886,GO:0006581,GO:0007155,GO:0007416,GO:0008291,GO:0009986,GO:0016020,GO:0016787,GO:0017171,GO:0019695,GO:0030424,GO:0030425,GO:0031594,GO:0031623,GO:0032868,GO:0033265,GO:0042135,GO:0042166,GO:0042734,GO:0042802,GO:0042803,GO:0043025,GO:0043083,GO:0043236,GO:0043621,GO:…	regulation of receptor recycling|acetylcholinesterase activity|cholinesterase activity|protein binding|collagen binding|extracellular region|basement membrane|extracellular space|nuclear envelope|endoplasmic reticulum lumen|Golgi apparatus|plasma membrane|acetylcholine catabolic process|cell adhesion|synapse assembly|acetylcholine metabolic process|cell surface|membrane|hydrolase activity|serine …	WP522,WP175	Biogenic amine synthesis|Acetylcholine synthesis
Acin1	3201.57	3164.02	3239.12	1.02371	0.0338057	0.789645	0.975132	Up	16.0081	20.0363	17.7563	16.4675	16.6015	20.1067	56215	apoptotic chromatin condensation inducer 1	protein_coding	mmu03040,mmu03013,mmu03015	Spliceosome|Nucleocytoplasmic transport|mRNA surveillance pathway	GO:0003676,GO:0005634,GO:0005654,GO:0005730,GO:0005829,GO:0005886,GO:0006397,GO:0006915,GO:0008380,GO:0016607,GO:0030263,GO:0035145,GO:0043065,GO:0048025,GO:0061574	nucleic acid binding|nucleus|nucleoplasm|nucleolus|cytosol|plasma membrane|mRNA processing|apoptotic process|RNA splicing|nuclear speck|apoptotic chromosome condensation|exon-exon junction complex|positive regulation of apoptotic process|negative regulation of mRNA splicing, via spliceosome|ASAP complex	WP310	mRNA processing	R-MMU-109581,R-MMU-111465,R-MMU-5357801,R-MMU-72163,R-MMU-72172,R-MMU-72203,R-MMU-75153,R-MMU-8953854	Apoptosis|Apoptotic cleavage of cellular proteins|Programmed Cell Death|mRNA Splicing - Major Pathway|mRNA Splicing|Processing of Capped Intron-Containing Pre-mRNA|Apoptotic execution phase|Metabolism of RNA
Ackr1	3.49801	3.04299	3.95303	1.30326	0.382125	0.758234	0.968809	Up	0.0261998	0.159473	0.105113	0.0425201	0.0931279	0.0896024	13349	atypical chemokine receptor 1 (Duffy blood group)	protein_coding	mmu05144	Malaria	GO:0004930,GO:0005768,GO:0006954,GO:0007165,GO:0007186,GO:0016020,GO:0019956,GO:0019957,GO:0032642,GO:0070098	G protein-coupled receptor activity|endosome|inflammatory response|signal transduction|G protein-coupled receptor signaling pathway|membrane|chemokine binding|C-C chemokine binding|regulation of chemokine production|chemokine-mediated signaling pathway	WP1396,WP41	GPCRs, non-odorant |GPCRs, other
Ackr2	419.188	582.524	255.853	0.439237	-1.18693	5.74762e-06	0.000834293	Down	2.64166	2.70912	1.47413	5.71367	5.32661	4.57469	59289	atypical chemokine receptor 2	protein_coding			GO:0004930,GO:0004950,GO:0005044,GO:0005515,GO:0005654,GO:0005768,GO:0005829,GO:0005884,GO:0005886,GO:0006935,GO:0006954,GO:0006955,GO:0007165,GO:0007186,GO:0007204,GO:0009897,GO:0016020,GO:0016493,GO:0019722,GO:0019957,GO:0031965,GO:0043231,GO:0060326	G protein-coupled receptor activity|chemokine receptor activity|scavenger receptor activity|protein binding|nucleoplasm|endosome|cytosol|actin filament|plasma membrane|chemotaxis|inflammatory response|immune response|signal transduction|G protein-coupled receptor signaling pathway|positive regulation of cytosolic calcium ion concentration|external side of plasma membrane|membrane|C-C chemokine re…	WP1396,WP189	GPCRs, non-odorant |GPCRs, class A rhodopsin-like	R-MMU-162582,R-MMU-372790,R-MMU-373076,R-MMU-375276,R-MMU-380108,R-MMU-500792	Signal Transduction|Signaling by GPCR|Class A/1 (Rhodopsin-like receptors)|Peptide ligand-binding receptors|Chemokine receptors bind chemokines|GPCR ligand binding
Ackr3	1011.42	1044.37	978.474	0.93698	-0.0939091	0.57601	0.934789	Down	12.3083	10.0475	13.1185	13.1579	12.8302	12.1993	12778	atypical chemokine receptor 3	protein_coding	mmu04060,mmu04061	Cytokine-cytokine receptor interaction|Viral protein interaction with cytokine and cytokine receptor	GO:0001525,GO:0001570,GO:0004930,GO:0005044,GO:0005768,GO:0005886,GO:0005905,GO:0006935,GO:0006955,GO:0007155,GO:0007165,GO:0007186,GO:0007204,GO:0007275,GO:0008285,GO:0009897,GO:0009986,GO:0015026,GO:0016020,GO:0016493,GO:0016494,GO:0019722,GO:0019956,GO:0019957,GO:0019958,GO:0021557,GO:0031623,GO:0043231,GO:0060326,GO:0070098,GO:0070374,GO:1902230,GO:1905322	angiogenesis|vasculogenesis|G protein-coupled receptor activity|scavenger receptor activity|endosome|plasma membrane|clathrin-coated pit|chemotaxis|immune response|cell adhesion|signal transduction|G protein-coupled receptor signaling pathway|positive regulation of cytosolic calcium ion concentration|multicellular organism development|negative regulation of cell population proliferation|external …	WP1396,WP385,WP189	GPCRs, non-odorant |Myometrial relaxation and contraction pathways|GPCRs, class A rhodopsin-like	R-MMU-162582,R-MMU-372790,R-MMU-373076,R-MMU-375276,R-MMU-380108,R-MMU-388396,R-MMU-418594,R-MMU-500792	Signal Transduction|Signaling by GPCR|Class A/1 (Rhodopsin-like receptors)|Peptide ligand-binding receptors|Chemokine receptors bind chemokines|GPCR downstream signalling|G alpha (i) signalling events|GPCR ligand binding
Ackr4	79.8923	63.1725	96.6121	1.52878	0.612384	0.0742547	0.517494	Up	0.970677	1.1545	0.872872	0.896309	0.495733	0.57236	252837	atypical chemokine receptor 4	protein_coding	mmu04060,mmu04061	Cytokine-cytokine receptor interaction|Viral protein interaction with cytokine and cytokine receptor	GO:0004930,GO:0004950,GO:0005044,GO:0005768,GO:0005886,GO:0006935,GO:0006955,GO:0007165,GO:0007186,GO:0007204,GO:0009897,GO:0016020,GO:0016493,GO:0019722,GO:0019956,GO:0019957,GO:0060326	G protein-coupled receptor activity|chemokine receptor activity|scavenger receptor activity|endosome|plasma membrane|chemotaxis|immune response|signal transduction|G protein-coupled receptor signaling pathway|positive regulation of cytosolic calcium ion concentration|external side of plasma membrane|membrane|C-C chemokine receptor activity|calcium-mediated signaling|chemokine binding|C-C chemokin…			R-MMU-162582,R-MMU-372790,R-MMU-373076,R-MMU-375276,R-MMU-380108,R-MMU-500792	Signal Transduction|Signaling by GPCR|Class A/1 (Rhodopsin-like receptors)|Peptide ligand-binding receptors|Chemokine receptors bind chemokines|GPCR ligand binding
Acly	6127.02	5974.27	6279.77	1.05112	0.0719239	0.509766	0.91942	Up	23.6931	22.3073	21.6813	20.8576	20.92	23.387	104112	ATP citrate lyase	protein_coding	mmu00020	Citrate cycle (TCA cycle)	GO:0000166,GO:0003824,GO:0003878,GO:0005515,GO:0005524,GO:0005654,GO:0005737,GO:0005739,GO:0005829,GO:0006084,GO:0006085,GO:0006099,GO:0006101,GO:0006107,GO:0006629,GO:0006633,GO:0008610,GO:0016740,GO:0046872,GO:0046912	nucleotide binding|catalytic activity|ATP citrate synthase activity|protein binding|ATP binding|nucleoplasm|cytoplasm|mitochondrion|cytosol|acetyl-CoA metabolic process|acetyl-CoA biosynthetic process|tricarboxylic acid cycle|citrate metabolic process|oxaloacetate metabolic process|lipid metabolic process|fatty acid biosynthetic process|lipid biosynthetic process|transferase activity|metal ion bi…	WP336,WP662	Fatty acid biosynthesis|Amino acid metabolism	R-MMU-1430728,R-MMU-168249,R-MMU-168256,R-MMU-556833,R-MMU-6798695,R-MMU-75105,R-MMU-8978868	Metabolism|Innate Immune System|Immune System|Metabolism of lipids|Neutrophil degranulation|Fatty acyl-CoA biosynthesis|Fatty acid metabolism
Acmsd	11.5999	11.6696	11.5301	0.986728	-0.0192758	0.979046	0.997617	Down	0.0558883	0.136073	0.168168	0.0907024	0.0993285	0.18158	266645	amino carboxymuconate semialdehyde decarboxylase	protein_coding	mmu00380	Tryptophan metabolism	GO:0001760,GO:0005737,GO:0005829,GO:0006569,GO:0008270,GO:0016787,GO:0016829,GO:0016831,GO:0019748,GO:0046872,GO:0046874,GO:1904985	aminocarboxymuconate-semialdehyde decarboxylase activity|cytoplasm|cytosol|tryptophan catabolic process|zinc ion binding|hydrolase activity|lyase activity|carboxy-lyase activity|secondary metabolic process|metal ion binding|quinolinate metabolic process|negative regulation of quinolinate biosynthetic process	WP79	Tryptophan metabolism
Acnat1	726.404	654.595	798.214	1.2195	0.286285	0.674593	0.956026	Up	3.03273	1.53347	5.98799	3.29673	3.80094	1.51256	230161	acyl-coenzyme A amino acid N-acyltransferase 1	protein_coding	mmu00120,mmu01040,mmu00430,mmu04146,mmu04976	Primary bile acid biosynthesis|Biosynthesis of unsaturated fatty acids|Taurine and hypotaurine metabolism|Peroxisome|Bile secretion	GO:0005777,GO:0006629,GO:0006631,GO:0006637,GO:0016410,GO:0016740,GO:0016746,GO:0016790,GO:0047617	peroxisome|lipid metabolic process|fatty acid metabolic process|acyl-CoA metabolic process|N-acyltransferase activity|transferase activity|acyltransferase activity|thiolester hydrolase activity|acyl-CoA hydrolase activity
Acnat2	10.5101	7.32721	13.6931	1.87729	0.908655	0.519737	0.922674	Up	0.0300694	0.0101682	0.341809	0.0569336	0.14251	0	209186	acyl-coenzyme A amino acid N-acyltransferase 2	protein_coding	mmu00120,mmu01040,mmu00430,mmu04146,mmu04976	Primary bile acid biosynthesis|Biosynthesis of unsaturated fatty acids|Taurine and hypotaurine metabolism|Peroxisome|Bile secretion	GO:0005777,GO:0006629,GO:0006631,GO:0006637,GO:0016740,GO:0016746,GO:0016790,GO:0047617	peroxisome|lipid metabolic process|fatty acid metabolic process|acyl-CoA metabolic process|transferase activity|acyltransferase activity|thiolester hydrolase activity|acyl-CoA hydrolase activity
Aco1	3900.83	3205.01	4596.65	1.43404	0.520089	0.000833065	0.0371143	Up	32.2541	27.8251	28.1068	21.1516	16.9884	24.3021	11428	aconitase 1	protein_coding	mmu00020,mmu00630	Citrate cycle (TCA cycle)|Glyoxylate and dicarboxylate metabolism	GO:0003723,GO:0003994,GO:0005737,GO:0005739,GO:0005783,GO:0005794,GO:0005829,GO:0006099,GO:0006101,GO:0006417,GO:0006879,GO:0009791,GO:0010040,GO:0010468,GO:0016829,GO:0030350,GO:0046872,GO:0047780,GO:0048027,GO:0050892,GO:0051536,GO:0051538,GO:0051539	RNA binding|aconitate hydratase activity|cytoplasm|mitochondrion|endoplasmic reticulum|Golgi apparatus|cytosol|tricarboxylic acid cycle|citrate metabolic process|regulation of translation|intracellular iron ion homeostasis|post-embryonic development|response to iron(II) ion|regulation of gene expression|lyase activity|iron-responsive element binding|metal ion binding|citrate dehydratase activity|…	WP310	mRNA processing	R-MMU-382551,R-MMU-917937	Transport of small molecules|Iron uptake and transport
Aco2	5076.7	5260.52	4892.88	0.930173	-0.104429	0.458945	0.906457	Down	49.184	50.9009	49.5855	55.6591	57.2451	48.8755	11429	aconitase 2%2C mitochondrial	protein_coding	mmu00020,mmu00630	Citrate cycle (TCA cycle)|Glyoxylate and dicarboxylate metabolism	GO:0003994,GO:0005506,GO:0005739,GO:0005759,GO:0005829,GO:0006099,GO:0006101,GO:0006102,GO:0016829,GO:0043209,GO:0046872,GO:0047780,GO:0051536,GO:0051538,GO:0051539	aconitate hydratase activity|iron ion binding|mitochondrion|mitochondrial matrix|cytosol|tricarboxylic acid cycle|citrate metabolic process|isocitrate metabolic process|lyase activity|myelin sheath|metal ion binding|citrate dehydratase activity|iron-sulfur cluster binding|3 iron, 4 sulfur cluster binding|4 iron, 4 sulfur cluster binding	WP434,WP662	TCA cycle|Amino acid metabolism	R-MMU-1428517,R-MMU-1430728,R-MMU-71403,R-MMU-71406	The citric acid (TCA) cycle and respiratory electron transport|Metabolism|Citric acid cycle (TCA cycle)|Pyruvate metabolism and Citric Acid (TCA) cycle
Acod1	18.2527	35.0729	1.43245	0.0410745	-4.60561	2.35345e-05	0.00252497	Down	0	0.0358322	0.011809	0.0955389	0.345263	0.754982	16365	aconitate decarboxylase 1	protein_coding			GO:0002376,GO:0002760,GO:0005739,GO:0006952,GO:0006954,GO:0007566,GO:0009617,GO:0016829,GO:0032088,GO:0032480,GO:0032496,GO:0034136,GO:0034144,GO:0035458,GO:0042803,GO:0045087,GO:0045824,GO:0047613,GO:0050728,GO:0051607,GO:0071219,GO:0071222,GO:0071346,GO:0071347,GO:0071356,GO:0071393,GO:0072573,GO:2000379	immune system process|positive regulation of antimicrobial humoral response|mitochondrion|defense response|inflammatory response|embryo implantation|response to bacterium|lyase activity|negative regulation of NF-kappaB transcription factor activity|negative regulation of type I interferon production|response to lipopolysaccharide|negative regulation of toll-like receptor 2 signaling pathway|negat…
Acot1	209.241	160.518	257.964	1.60603	0.683498	0.00598849	0.133935	Up	4.12395	3.84656	6.03785	2.79133	2.51838	3.54266	26897	acyl-CoA thioesterase 1	protein_coding	mmu00062,mmu01040,mmu04913	Fatty acid elongation|Biosynthesis of unsaturated fatty acids|Ovarian steroidogenesis	GO:0000038,GO:0001676,GO:0005737,GO:0005739,GO:0005829,GO:0006629,GO:0006631,GO:0006637,GO:0010667,GO:0016290,GO:0016787,GO:0016790,GO:0047617,GO:0052689,GO:0102991	very long-chain fatty acid metabolic process|long-chain fatty acid metabolic process|cytoplasm|mitochondrion|cytosol|lipid metabolic process|fatty acid metabolic process|acyl-CoA metabolic process|negative regulation of cardiac muscle cell apoptotic process|palmitoyl-CoA hydrolase activity|hydrolase activity|thiolester hydrolase activity|acyl-CoA hydrolase activity|carboxylic ester hydrolase acti…	WP4350,WP4351,WP4346	Omega-3 / omega-6 fatty acid synthesis|Omega-9 fatty acid synthesis|Cholesterol metabolism with Bloch and Kandutsch-Russell pathways	R-MMU-1430728,R-MMU-556833,R-MMU-77289,R-MMU-8978868,R-MMU-9033241,R-MMU-9609507	Metabolism|Metabolism of lipids|Mitochondrial Fatty Acid Beta-Oxidation|Fatty acid metabolism|Peroxisomal protein import|Protein localization
Acot11	110.309	105.417	115.202	1.0948	0.130674	0.695757	0.959881	Up	0.580782	0.489236	0.587725	0.479698	0.691209	0.345822	329910	acyl-CoA thioesterase 11	protein_coding			GO:0005737,GO:0005739,GO:0005759,GO:0005829,GO:0006629,GO:0006631,GO:0006637,GO:0008289,GO:0009266,GO:0009409,GO:0016290,GO:0016787,GO:0016790,GO:0035556,GO:0047617,GO:0052689,GO:0052816,GO:0102991,GO:0120163	cytoplasm|mitochondrion|mitochondrial matrix|cytosol|lipid metabolic process|fatty acid metabolic process|acyl-CoA metabolic process|lipid binding|response to temperature stimulus|response to cold|palmitoyl-CoA hydrolase activity|hydrolase activity|thiolester hydrolase activity|intracellular signal transduction|acyl-CoA hydrolase activity|carboxylic ester hydrolase activity|long-chain acyl-CoA hy…			R-MMU-1430728,R-MMU-556833,R-MMU-77289,R-MMU-8978868	Metabolism|Metabolism of lipids|Mitochondrial Fatty Acid Beta-Oxidation|Fatty acid metabolism
Acot12	10.1222	9.41749	10.8269	1.15116	0.203086	0.788735	0.974839	Up	0.0697489	0.131408	0.0999402	0.129368	0.0708357	0.0596348	74156	acyl-CoA thioesterase 12	protein_coding	mmu00620	Pyruvate metabolism	GO:0003986,GO:0005524,GO:0005654,GO:0005737,GO:0005829,GO:0006084,GO:0006629,GO:0006631,GO:0006637,GO:0008289,GO:0016787,GO:0016790,GO:0042802,GO:0045171,GO:0047617,GO:0052689	acetyl-CoA hydrolase activity|ATP binding|nucleoplasm|cytoplasm|cytosol|acetyl-CoA metabolic process|lipid metabolic process|fatty acid metabolic process|acyl-CoA metabolic process|lipid binding|hydrolase activity|thiolester hydrolase activity|identical protein binding|intercellular bridge|acyl-CoA hydrolase activity|carboxylic ester hydrolase activity			R-MMU-1430728,R-MMU-556833,R-MMU-77289,R-MMU-8978868	Metabolism|Metabolism of lipids|Mitochondrial Fatty Acid Beta-Oxidation|Fatty acid metabolism
Acot13	367.98	449.166	286.794	0.638495	-0.647253	0.027495	0.313201	Down	10.3048	11.6706	13.4543	10.2722	20.5643	25.862	66834	acyl-CoA thioesterase 13	protein_coding			GO:0005634,GO:0005737,GO:0005739,GO:0005759,GO:0005856,GO:0006629,GO:0016290,GO:0016787,GO:0047617,GO:0051289,GO:0102991,GO:0120163	nucleus|cytoplasm|mitochondrion|mitochondrial matrix|cytoskeleton|lipid metabolic process|palmitoyl-CoA hydrolase activity|hydrolase activity|acyl-CoA hydrolase activity|protein homotetramerization|myristoyl-CoA hydrolase activity|negative regulation of cold-induced thermogenesis			R-MMU-1430728,R-MMU-556833,R-MMU-77289,R-MMU-8978868	Metabolism|Metabolism of lipids|Mitochondrial Fatty Acid Beta-Oxidation|Fatty acid metabolism
Acot2	470.441	404.035	536.846	1.32772	0.408955	0.0207066	0.26875	Up	6.75887	6.68808	7.20978	5.00129	4.28308	6.52482	171210	acyl-CoA thioesterase 2	protein_coding	mmu00062,mmu01040,mmu04913	Fatty acid elongation|Biosynthesis of unsaturated fatty acids|Ovarian steroidogenesis	GO:0000038,GO:0001666,GO:0001676,GO:0005739,GO:0006629,GO:0006631,GO:0006637,GO:0016290,GO:0016787,GO:0016790,GO:0042760,GO:0047617,GO:0052689,GO:0102991	very long-chain fatty acid metabolic process|response to hypoxia|long-chain fatty acid metabolic process|mitochondrion|lipid metabolic process|fatty acid metabolic process|acyl-CoA metabolic process|palmitoyl-CoA hydrolase activity|hydrolase activity|thiolester hydrolase activity|very long-chain fatty acid catabolic process|acyl-CoA hydrolase activity|carboxylic ester hydrolase activity|myristoyl…	WP4350,WP4351,WP4346	Omega-3 / omega-6 fatty acid synthesis|Omega-9 fatty acid synthesis|Cholesterol metabolism with Bloch and Kandutsch-Russell pathways	R-MMU-1430728,R-MMU-556833,R-MMU-77289,R-MMU-8978868,R-MMU-9033241,R-MMU-9609507	Metabolism|Metabolism of lipids|Mitochondrial Fatty Acid Beta-Oxidation|Fatty acid metabolism|Peroxisomal protein import|Protein localization
Acot3	4.11092	4.59913	3.6227	0.789673	-0.340672	0.765182	0.970278	Down	0.0354718	0.0449815	0.00889456	0.03598	0.0472822	0.0303282	171281	acyl-CoA thioesterase 3	protein_coding	mmu00062,mmu01040,mmu04913	Fatty acid elongation|Biosynthesis of unsaturated fatty acids|Ovarian steroidogenesis	GO:0000038,GO:0001676,GO:0005777,GO:0005829,GO:0006629,GO:0006631,GO:0006637,GO:0016290,GO:0016787,GO:0016790,GO:0032788,GO:0032789,GO:0047617,GO:0052689,GO:0102991	very long-chain fatty acid metabolic process|long-chain fatty acid metabolic process|peroxisome|cytosol|lipid metabolic process|fatty acid metabolic process|acyl-CoA metabolic process|palmitoyl-CoA hydrolase activity|hydrolase activity|thiolester hydrolase activity|saturated monocarboxylic acid metabolic process|unsaturated monocarboxylic acid metabolic process|acyl-CoA hydrolase activity|carboxy…			R-MMU-1430728,R-MMU-556833,R-MMU-77289,R-MMU-8978868,R-MMU-9033241,R-MMU-9609507	Metabolism|Metabolism of lipids|Mitochondrial Fatty Acid Beta-Oxidation|Fatty acid metabolism|Peroxisomal protein import|Protein localization
Acot4	73.2594	80.0742	66.4447	0.830589	-0.267794	0.560299	0.932978	Down	0.60714	0.229946	0.649558	0.512377	0.834465	0.456808	171282	acyl-CoA thioesterase 4	protein_coding	mmu00062,mmu01040,mmu04913	Fatty acid elongation|Biosynthesis of unsaturated fatty acids|Ovarian steroidogenesis	GO:0000038,GO:0001676,GO:0004778,GO:0005777,GO:0006104,GO:0006629,GO:0006631,GO:0006637,GO:0016787,GO:0016790,GO:0032788,GO:0032789,GO:0043648,GO:0043649,GO:0044466,GO:0046459,GO:0047617,GO:0052689	very long-chain fatty acid metabolic process|long-chain fatty acid metabolic process|succinyl-CoA hydrolase activity|peroxisome|succinyl-CoA metabolic process|lipid metabolic process|fatty acid metabolic process|acyl-CoA metabolic process|hydrolase activity|thiolester hydrolase activity|saturated monocarboxylic acid metabolic process|unsaturated monocarboxylic acid metabolic process|dicarboxylic …			R-MMU-1430728,R-MMU-390247,R-MMU-390918,R-MMU-556833,R-MMU-8978868,R-MMU-9033241,R-MMU-9609507	Metabolism|Beta-oxidation of very long chain fatty acids|Peroxisomal lipid metabolism|Metabolism of lipids|Fatty acid metabolism|Peroxisomal protein import|Protein localization
Acot6	62.339	69.5653	55.1128	0.79349	-0.333716	0.474578	0.910452	Down	0.510468	0.263636	0.642326	0.504601	0.882496	0.404705	217700	acyl-CoA thioesterase 6	protein_coding			GO:0005777,GO:0005829,GO:0006629,GO:0006631,GO:0006637,GO:0016787,GO:0016790,GO:0047617,GO:0052689	peroxisome|cytosol|lipid metabolic process|fatty acid metabolic process|acyl-CoA metabolic process|hydrolase activity|thiolester hydrolase activity|acyl-CoA hydrolase activity|carboxylic ester hydrolase activity			R-MMU-1430728,R-MMU-390247,R-MMU-390918,R-MMU-556833,R-MMU-8978868	Metabolism|Beta-oxidation of very long chain fatty acids|Peroxisomal lipid metabolism|Metabolism of lipids|Fatty acid metabolism
Acot7	288.699	287.327	290.071	1.00996	0.0142975	0.93522	0.993193	Up	1.80846	2.05047	2.27117	1.92994	2.07973	2.11793	70025	acyl-CoA thioesterase 7	protein_coding	mmu00062,mmu01040	Fatty acid elongation|Biosynthesis of unsaturated fatty acids	GO:0000062,GO:0005654,GO:0005737,GO:0005759,GO:0005829,GO:0006629,GO:0006631,GO:0006637,GO:0009062,GO:0015937,GO:0016290,GO:0016787,GO:0016790,GO:0036042,GO:0036114,GO:0036116,GO:0042802,GO:0042803,GO:0043005,GO:0043025,GO:0047617,GO:0051792,GO:0052689,GO:0102991,GO:1900535	fatty-acyl-CoA binding|nucleoplasm|cytoplasm|mitochondrial matrix|cytosol|lipid metabolic process|fatty acid metabolic process|acyl-CoA metabolic process|fatty acid catabolic process|coenzyme A biosynthetic process|palmitoyl-CoA hydrolase activity|hydrolase activity|thiolester hydrolase activity|long-chain fatty acyl-CoA binding|medium-chain fatty-acyl-CoA catabolic process|long-chain fatty-acyl-…			R-MMU-1430728,R-MMU-556833,R-MMU-77289,R-MMU-8978868	Metabolism|Metabolism of lipids|Mitochondrial Fatty Acid Beta-Oxidation|Fatty acid metabolism
Acot8	395.028	419.19	370.865	0.884583	-0.176931	0.262856	0.800024	Down	3.27757	2.98687	3.26883	3.27569	3.579	4.06888	170789	acyl-CoA thioesterase 8	protein_coding	mmu00120,mmu04146	Primary bile acid biosynthesis|Peroxisome	GO:0003986,GO:0004778,GO:0005739,GO:0005777,GO:0005782,GO:0006629,GO:0006631,GO:0006637,GO:0007031,GO:0009062,GO:0016290,GO:0016559,GO:0016787,GO:0033882,GO:0043649,GO:0044466,GO:0045225,GO:0047603,GO:0047617,GO:0047994,GO:0052689,GO:0052815,GO:0102991	acetyl-CoA hydrolase activity|succinyl-CoA hydrolase activity|mitochondrion|peroxisome|peroxisomal matrix|lipid metabolic process|fatty acid metabolic process|acyl-CoA metabolic process|peroxisome organization|fatty acid catabolic process|palmitoyl-CoA hydrolase activity|peroxisome fission|hydrolase activity|choloyl-CoA hydrolase activity|dicarboxylic acid catabolic process|glutaryl-CoA hydrolase…			R-MMU-1430728,R-MMU-192105,R-MMU-193368,R-MMU-194068,R-MMU-2046104,R-MMU-2046106,R-MMU-389887,R-MMU-390247,R-MMU-390918,R-MMU-556833,R-MMU-8957322,R-MMU-8978868,R-MMU-9033241,R-MMU-9609507	Metabolism|Synthesis of bile acids and bile salts|Synthesis of bile acids and bile salts via 7alpha-hydroxycholesterol|Bile acid and bile salt metabolism|alpha-linolenic (omega3) and linoleic (omega6) acid metabolism|alpha-linolenic acid (ALA) metabolism|Beta-oxidation of pristanoyl-CoA|Beta-oxidation of very long chain fatty acids|Peroxisomal lipid metabolism|Metabolism of lipids|Metabolism of s…
Acot9	2201.4	2044.18	2358.63	1.15374	0.206323	0.134373	0.666328	Up	32.9271	34.2566	40.9143	29.997	28.9964	35.9059	56360	acyl-CoA thioesterase 9	protein_coding			GO:0001676,GO:0003986,GO:0005515,GO:0005739,GO:0005759,GO:0006637,GO:0016290,GO:0016787,GO:0046459,GO:0047617,GO:0052689,GO:0102991	long-chain fatty acid metabolic process|acetyl-CoA hydrolase activity|protein binding|mitochondrion|mitochondrial matrix|acyl-CoA metabolic process|palmitoyl-CoA hydrolase activity|hydrolase activity|short-chain fatty acid metabolic process|acyl-CoA hydrolase activity|carboxylic ester hydrolase activity|myristoyl-CoA hydrolase activity			R-MMU-1430728,R-MMU-556833,R-MMU-77289,R-MMU-8978868	Metabolism|Metabolism of lipids|Mitochondrial Fatty Acid Beta-Oxidation|Fatty acid metabolism
Acox1	5571.95	5656.37	5487.53	0.970194	-0.0436546	0.728609	0.96572	Down	38.0526	38.1096	43.5201	37.9863	43.8379	42.7689	11430	acyl-Coenzyme A oxidase 1%2C palmitoyl	protein_coding	mmu00640,mmu00071,mmu00592,mmu01040,mmu00410,mmu04024,mmu04146,mmu03320,mmu04936	Propanoate metabolism|Fatty acid degradation|alpha-Linolenic acid metabolism|Biosynthesis of unsaturated fatty acids|beta-Alanine metabolism|cAMP signaling pathway|Peroxisome|PPAR signaling pathway|Alcoholic liver disease	GO:0000038,GO:0003997,GO:0005504,GO:0005737,GO:0005739,GO:0005777,GO:0005778,GO:0005829,GO:0006091,GO:0006629,GO:0006631,GO:0006635,GO:0006693,GO:0007283,GO:0009062,GO:0016401,GO:0016491,GO:0016559,GO:0016627,GO:0019395,GO:0030165,GO:0033540,GO:0042632,GO:0042803,GO:0050660,GO:0050665,GO:0055088,GO:0071949,GO:0140493	very long-chain fatty acid metabolic process|acyl-CoA oxidase activity|fatty acid binding|cytoplasm|mitochondrion|peroxisome|peroxisomal membrane|cytosol|generation of precursor metabolites and energy|lipid metabolic process|fatty acid metabolic process|fatty acid beta-oxidation|prostaglandin metabolic process|spermatogenesis|fatty acid catabolic process|palmitoyl-CoA oxidase activity|oxidoreduct…	WP4350,WP4347,WP4348,WP2316	Omega-3 / omega-6 fatty acid synthesis|Eicosanoid metabolism via cyclooxygenases (COX)|Eicosanoid metabolism via lipoxygenases (LOX)|PPAR signaling pathway	R-MMU-1430728,R-MMU-2046104,R-MMU-2046106,R-MMU-390247,R-MMU-390918,R-MMU-556833,R-MMU-8978868,R-MMU-9033241,R-MMU-9609507	Metabolism|alpha-linolenic (omega3) and linoleic (omega6) acid metabolism|alpha-linolenic acid (ALA) metabolism|Beta-oxidation of very long chain fatty acids|Peroxisomal lipid metabolism|Metabolism of lipids|Fatty acid metabolism|Peroxisomal protein import|Protein localization
Acox2	1113.79	1234.71	992.872	0.804176	-0.314417	0.601859	0.940938	Down	6.69708	4.24982	14.9417	9.71793	14.7988	7.70153	93732	acyl-Coenzyme A oxidase 2%2C branched chain	protein_coding	mmu00120,mmu04146,mmu03320	Primary bile acid biosynthesis|Peroxisome|PPAR signaling pathway	GO:0000038,GO:0003997,GO:0005504,GO:0005777,GO:0005829,GO:0006629,GO:0006631,GO:0006635,GO:0006699,GO:0016401,GO:0016491,GO:0016627,GO:0033540,GO:0033791,GO:0043231,GO:0050660,GO:0055088,GO:0071949	very long-chain fatty acid metabolic process|acyl-CoA oxidase activity|fatty acid binding|peroxisome|cytosol|lipid metabolic process|fatty acid metabolic process|fatty acid beta-oxidation|bile acid biosynthetic process|palmitoyl-CoA oxidase activity|oxidoreductase activity|oxidoreductase activity, acting on the CH-CH group of donors|fatty acid beta-oxidation using acyl-CoA oxidase|3alpha,7alpha,1…	WP4347,WP4348,WP2316	Eicosanoid metabolism via cyclooxygenases (COX)|Eicosanoid metabolism via lipoxygenases (LOX)|PPAR signaling pathway	R-MMU-1430728,R-MMU-192105,R-MMU-193368,R-MMU-194068,R-MMU-389887,R-MMU-390918,R-MMU-556833,R-MMU-8957322,R-MMU-8978868,R-MMU-9033241,R-MMU-9609507	Metabolism|Synthesis of bile acids and bile salts|Synthesis of bile acids and bile salts via 7alpha-hydroxycholesterol|Bile acid and bile salt metabolism|Beta-oxidation of pristanoyl-CoA|Peroxisomal lipid metabolism|Metabolism of lipids|Metabolism of steroids|Fatty acid metabolism|Peroxisomal protein import|Protein localization
Acox3	1054.22	1020.53	1087.92	1.06601	0.0922165	0.634369	0.946787	Up	3.82986	3.42398	4.58838	2.85012	3.89799	4.55146	80911	acyl-Coenzyme A oxidase 3%2C pristanoyl	protein_coding	mmu00640,mmu00071,mmu00592,mmu01040,mmu00410,mmu04024,mmu04146,mmu03320,mmu04936	Propanoate metabolism|Fatty acid degradation|alpha-Linolenic acid metabolism|Biosynthesis of unsaturated fatty acids|beta-Alanine metabolism|cAMP signaling pathway|Peroxisome|PPAR signaling pathway|Alcoholic liver disease	GO:0003997,GO:0005504,GO:0005739,GO:0005777,GO:0005782,GO:0006629,GO:0006631,GO:0006635,GO:0016402,GO:0016491,GO:0016627,GO:0033540,GO:0050660,GO:0055088,GO:0071949	acyl-CoA oxidase activity|fatty acid binding|mitochondrion|peroxisome|peroxisomal matrix|lipid metabolic process|fatty acid metabolic process|fatty acid beta-oxidation|pristanoyl-CoA oxidase activity|oxidoreductase activity|oxidoreductase activity, acting on the CH-CH group of donors|fatty acid beta-oxidation using acyl-CoA oxidase|flavin adenine dinucleotide binding|lipid homeostasis|FAD binding	WP4350,WP4347,WP4348,WP2316	Omega-3 / omega-6 fatty acid synthesis|Eicosanoid metabolism via cyclooxygenases (COX)|Eicosanoid metabolism via lipoxygenases (LOX)|PPAR signaling pathway	R-MMU-1430728,R-MMU-389887,R-MMU-390918,R-MMU-556833,R-MMU-8978868,R-MMU-9033241,R-MMU-9609507	Metabolism|Beta-oxidation of pristanoyl-CoA|Peroxisomal lipid metabolism|Metabolism of lipids|Fatty acid metabolism|Peroxisomal protein import|Protein localization
Acp1	703.333	754.554	652.113	0.86397	-0.210946	0.143517	0.680405	Down	5.75162	5.49896	5.88273	6.0643	6.17028	7.89402	11431	acid phosphatase 1%2C soluble	protein_coding	mmu00730,mmu00740,mmu04520,mmu05208	Thiamine metabolism|Riboflavin metabolism|Adherens junction|Chemical carcinogenesis - reactive oxygen species	GO:0003993,GO:0004721,GO:0004725,GO:0004726,GO:0005737,GO:0005829,GO:0006470,GO:0009898,GO:0016787,GO:0016791,GO:0017124,GO:0042383	acid phosphatase activity|phosphoprotein phosphatase activity|protein tyrosine phosphatase activity|non-membrane spanning protein tyrosine phosphatase activity|cytoplasm|cytosol|protein dephosphorylation|cytoplasmic side of plasma membrane|hydrolase activity|phosphatase activity|SH3 domain binding|sarcolemma
Acp2	1815.88	1852.72	1779.04	0.960242	-0.0585294	0.641653	0.947549	Down	10.769	11.3171	9.77354	11.3534	10.7208	11.4115	11432	acid phosphatase 2%2C lysosomal	protein_coding	mmu00740,mmu04142	Riboflavin metabolism|Lysosome	GO:0001501,GO:0001784,GO:0003993,GO:0004721,GO:0005764,GO:0007040,GO:0010033,GO:0016020,GO:0016311,GO:0016787,GO:0048102	skeletal system development|phosphotyrosine residue binding|acid phosphatase activity|phosphoprotein phosphatase activity|lysosome|lysosome organization|response to organic substance|membrane|dephosphorylation|hydrolase activity|autophagic cell death
Acp5	976.368	863.789	1088.95	1.2611	0.33468	0.173437	0.719494	Up	8.0831	10.6472	13.3495	8.30192	10.5017	6.63057	11433	acid phosphatase 5%2C tartrate resistant	protein_coding	mmu00740,mmu04142,mmu04380,mmu05323	Riboflavin metabolism|Lysosome|Osteoclast differentiation|Rheumatoid arthritis	GO:0003993,GO:0005615,GO:0005764,GO:0006809,GO:0007162,GO:0008198,GO:0008199,GO:0010934,GO:0010936,GO:0016311,GO:0016787,GO:0030335,GO:0032496,GO:0032611,GO:0032615,GO:0032640,GO:0032691,GO:0032695,GO:0032720,GO:0032929,GO:0034097,GO:0042554,GO:0045019,GO:0045453,GO:0046872,GO:0050728,GO:0050830,GO:0060349	acid phosphatase activity|extracellular space|lysosome|nitric oxide biosynthetic process|negative regulation of cell adhesion|ferrous iron binding|ferric iron binding|macrophage cytokine production|negative regulation of macrophage cytokine production|dephosphorylation|hydrolase activity|positive regulation of cell migration|response to lipopolysaccharide|interleukin-1 beta production|interleukin…	WP454	Osteoclast signaling	R-MMU-1430728,R-MMU-196843,R-MMU-196849,R-MMU-196854	Metabolism|Vitamin B2 (riboflavin) metabolism|Metabolism of water-soluble vitamins and cofactors|Metabolism of vitamins and cofactors
Acp6	512.052	486.918	537.187	1.10265	0.140981	0.421311	0.889243	Up	8.50254	8.696	8.70208	6.75867	7.00053	10.1478	66659	acid phosphatase 6%2C lysophosphatidic	protein_coding			GO:0002244,GO:0003993,GO:0005737,GO:0005739,GO:0006629,GO:0006644,GO:0016311,GO:0016787,GO:0052642,GO:2001311	hematopoietic progenitor cell differentiation|acid phosphatase activity|cytoplasm|mitochondrion|lipid metabolic process|phospholipid metabolic process|dephosphorylation|hydrolase activity|lysophosphatidic acid phosphatase activity|lysobisphosphatidic acid metabolic process			R-MMU-1430728,R-MMU-1483166,R-MMU-1483206,R-MMU-1483257,R-MMU-556833	Metabolism|Synthesis of PA|Glycerophospholipid biosynthesis|Phospholipid metabolism|Metabolism of lipids
Acp7	337.917	372.973	302.861	0.812606	-0.299373	0.220129	0.770258	Down	1.70447	1.53894	1.53293	1.65974	2.60015	1.65162	101744	acid phosphatase 7%2C tartrate resistant	protein_coding			GO:0003674,GO:0003993,GO:0005575,GO:0005576,GO:0008150,GO:0016787,GO:0046872	molecular_function|acid phosphatase activity|cellular_component|extracellular region|biological_process|hydrolase activity|metal ion binding
Acpp	871.795	766.211	977.379	1.27572	0.351307	0.0813797	0.541189	Up	4.94625	5.42776	3.51944	3.95143	3.58632	3.41994	56318	acid phosphatase%2C prostate	protein_coding			GO:0003993,GO:0004725,GO:0005576,GO:0005615,GO:0005764,GO:0005771,GO:0005886,GO:0006144,GO:0006629,GO:0006772,GO:0007040,GO:0008253,GO:0009117,GO:0012506,GO:0016020,GO:0016311,GO:0016787,GO:0016791,GO:0030141,GO:0030175,GO:0031985,GO:0033265,GO:0042131,GO:0042802,GO:0042803,GO:0045177,GO:0046085,GO:0051930,GO:0052642,GO:0060090,GO:0060168,GO:0106411	acid phosphatase activity|protein tyrosine phosphatase activity|extracellular region|extracellular space|lysosome|multivesicular body|plasma membrane|purine nucleobase metabolic process|lipid metabolic process|thiamine metabolic process|lysosome organization|5'-nucleotidase activity|nucleotide metabolic process|vesicle membrane|membrane|dephosphorylation|hydrolase activity|phosphatase activity|se…			R-MMU-168249,R-MMU-168256,R-MMU-6798695	Innate Immune System|Immune System|Neutrophil degranulation
Acrbp	48.4611	50.2714	46.6509	0.926656	-0.109894	0.804879	0.978138	Down	0.594129	0.88974	0.354709	0.665774	0.46511	0.88291	54137	proacrosin binding protein	protein_coding			GO:0001669,GO:0001675,GO:0005515,GO:0005576,GO:0007286,GO:0009566,GO:0016504	acrosomal vesicle|acrosome assembly|protein binding|extracellular region|spermatid development|fertilization|peptidase activator activity
Acsbg1	178.148	166.017	190.278	1.14705	0.197931	0.482683	0.912803	Up	1.36326	1.25477	2.15517	1.38463	1.57247	1.22733	94180	acyl-CoA synthetase bubblegum family member 1	protein_coding	mmu00061,mmu00071,mmu04920,mmu03320	Fatty acid biosynthesis|Fatty acid degradation|Adipocytokine signaling pathway|PPAR signaling pathway	GO:0000038,GO:0000166,GO:0001676,GO:0004467,GO:0005524,GO:0005737,GO:0005777,GO:0005783,GO:0005794,GO:0005886,GO:0006629,GO:0006631,GO:0016020,GO:0016874,GO:0031410,GO:0031957,GO:0042759,GO:0043231,GO:0051384	very long-chain fatty acid metabolic process|nucleotide binding|long-chain fatty acid metabolic process|long-chain fatty acid-CoA ligase activity|ATP binding|cytoplasm|peroxisome|endoplasmic reticulum|Golgi apparatus|plasma membrane|lipid metabolic process|fatty acid metabolic process|membrane|ligase activity|cytoplasmic vesicle|very long-chain fatty acid-CoA ligase activity|long-chain fatty acid…	WP2316	PPAR signaling pathway	R-MMU-1430728,R-MMU-556833,R-MMU-75105,R-MMU-75876,R-MMU-8978868	Metabolism|Metabolism of lipids|Fatty acyl-CoA biosynthesis|Synthesis of very long-chain fatty acyl-CoAs|Fatty acid metabolism
Acsf2	490.386	550.655	430.117	0.781083	-0.356453	0.0527783	0.439118	Down	3.37566	4.78425	3.73432	4.45526	4.89661	6.06944	264895	acyl-CoA synthetase family member 2	protein_coding			GO:0000166,GO:0005524,GO:0005739,GO:0006629,GO:0006631,GO:0016874,GO:0031956,GO:0047760	nucleotide binding|ATP binding|mitochondrion|lipid metabolic process|fatty acid metabolic process|ligase activity|medium-chain fatty acid-CoA ligase activity|butyrate-CoA ligase activity			R-MMU-1430728,R-MMU-556833,R-MMU-77289,R-MMU-8978868	Metabolism|Metabolism of lipids|Mitochondrial Fatty Acid Beta-Oxidation|Fatty acid metabolism
Acsf3	249.575	222.295	276.854	1.24503	0.316182	0.212615	0.760888	Up	2.75277	2.35927	4.01063	2.09897	2.30913	3.04345	257633	acyl-CoA synthetase family member 3	protein_coding	mmu00061,mmu00280	Fatty acid biosynthesis|Valine, leucine and isoleucine degradation	GO:0000166,GO:0005524,GO:0005654,GO:0005739,GO:0006629,GO:0006631,GO:0006633,GO:0016874,GO:0016878,GO:0031957,GO:0090409,GO:0090410	nucleotide binding|ATP binding|nucleoplasm|mitochondrion|lipid metabolic process|fatty acid metabolic process|fatty acid biosynthetic process|ligase activity|acid-thiol ligase activity|very long-chain fatty acid-CoA ligase activity|malonyl-CoA synthetase activity|malonate catabolic process			R-MMU-1430728,R-MMU-556833,R-MMU-75105,R-MMU-75876,R-MMU-8978868	Metabolism|Metabolism of lipids|Fatty acyl-CoA biosynthesis|Synthesis of very long-chain fatty acyl-CoAs|Fatty acid metabolism
Acsl1	1809.78	1770.78	1848.77	1.04417	0.0623594	0.798871	0.97746	Up	7.06859	5.43968	9.71371	6.34392	8.80626	6.26949	14081	acyl-CoA synthetase long-chain family member 1	protein_coding	mmu00061,mmu00071,mmu04146,mmu04216,mmu04920,mmu03320,mmu04714	Fatty acid biosynthesis|Fatty acid degradation|Peroxisome|Ferroptosis|Adipocytokine signaling pathway|PPAR signaling pathway|Thermogenesis	GO:0000038,GO:0000166,GO:0001676,GO:0004467,GO:0005524,GO:0005739,GO:0005741,GO:0005777,GO:0005778,GO:0005783,GO:0006629,GO:0006631,GO:0008610,GO:0010033,GO:0010747,GO:0015908,GO:0016020,GO:0016874,GO:0019432,GO:0033211,GO:0035338,GO:0042178,GO:0043231,GO:0043539,GO:0043758,GO:0044539,GO:0047676,GO:0050197,GO:0090434,GO:0120162	very long-chain fatty acid metabolic process|nucleotide binding|long-chain fatty acid metabolic process|long-chain fatty acid-CoA ligase activity|ATP binding|mitochondrion|mitochondrial outer membrane|peroxisome|peroxisomal membrane|endoplasmic reticulum|lipid metabolic process|fatty acid metabolic process|lipid biosynthetic process|response to organic substance|positive regulation of long-chain …	WP4350,WP4351,WP401,WP336,WP4346,WP1269,WP2316	Omega-3 / omega-6 fatty acid synthesis|Omega-9 fatty acid synthesis|Mitochondrial long chain fatty acid beta-oxidation|Fatty acid biosynthesis|Cholesterol metabolism with Bloch and Kandutsch-Russell pathways|Fatty acid beta-oxidation|PPAR signaling pathway	R-MMU-1430728,R-MMU-2046104,R-MMU-2046105,R-MMU-2046106,R-MMU-556833,R-MMU-75105,R-MMU-75876,R-MMU-8978868	Metabolism|alpha-linolenic (omega3) and linoleic (omega6) acid metabolism|Linoleic acid (LA) metabolism|alpha-linolenic acid (ALA) metabolism|Metabolism of lipids|Fatty acyl-CoA biosynthesis|Synthesis of very long-chain fatty acyl-CoAs|Fatty acid metabolism
Acsl3	2401.1	2438.27	2363.93	0.969369	-0.0448816	0.781392	0.973128	Down	14.7577	14.4585	16.8934	15.0176	13.2203	20.1452	74205	acyl-CoA synthetase long-chain family member 3	protein_coding	mmu00061,mmu00071,mmu04146,mmu04216,mmu04920,mmu03320,mmu04714	Fatty acid biosynthesis|Fatty acid degradation|Peroxisome|Ferroptosis|Adipocytokine signaling pathway|PPAR signaling pathway|Thermogenesis	GO:0000166,GO:0001676,GO:0004467,GO:0005524,GO:0005739,GO:0005741,GO:0005777,GO:0005783,GO:0005794,GO:0005811,GO:0005886,GO:0006629,GO:0006631,GO:0006633,GO:0016020,GO:0016874,GO:0019901,GO:0019904,GO:0030182,GO:0031956,GO:0034379,GO:0035336,GO:0042998,GO:0043231,GO:0044539,GO:0047676,GO:0047760,GO:0048471,GO:0051047,GO:2001247	nucleotide binding|long-chain fatty acid metabolic process|long-chain fatty acid-CoA ligase activity|ATP binding|mitochondrion|mitochondrial outer membrane|peroxisome|endoplasmic reticulum|Golgi apparatus|lipid droplet|plasma membrane|lipid metabolic process|fatty acid metabolic process|fatty acid biosynthetic process|membrane|ligase activity|protein kinase binding|protein domain specific binding…	WP4350,WP4351,WP401,WP336,WP4346,WP1269,WP2316	Omega-3 / omega-6 fatty acid synthesis|Omega-9 fatty acid synthesis|Mitochondrial long chain fatty acid beta-oxidation|Fatty acid biosynthesis|Cholesterol metabolism with Bloch and Kandutsch-Russell pathways|Fatty acid beta-oxidation|PPAR signaling pathway	R-MMU-1430728,R-MMU-163685,R-MMU-400451,R-MMU-422356,R-MMU-434313,R-MMU-556833,R-MMU-75105,R-MMU-75876,R-MMU-8978868	Metabolism|Integration of energy metabolism|Free fatty acids regulate insulin secretion|Regulation of insulin secretion|Intracellular metabolism of fatty acids regulates insulin secretion|Metabolism of lipids|Fatty acyl-CoA biosynthesis|Synthesis of very long-chain fatty acyl-CoAs|Fatty acid metabolism
Acsl4	3237.75	2995.63	3479.88	1.16151	0.215997	0.117887	0.632736	Up	18.7218	17.4263	16.9426	15.4194	13.0966	17.8534	50790	acyl-CoA synthetase long-chain family member 4	protein_coding	mmu00061,mmu00071,mmu04146,mmu04216,mmu04920,mmu03320,mmu04714	Fatty acid biosynthesis|Fatty acid degradation|Peroxisome|Ferroptosis|Adipocytokine signaling pathway|PPAR signaling pathway|Thermogenesis	GO:0000166,GO:0001676,GO:0004467,GO:0005524,GO:0005737,GO:0005739,GO:0005741,GO:0005777,GO:0005783,GO:0005811,GO:0005886,GO:0006629,GO:0006631,GO:0008610,GO:0015908,GO:0016020,GO:0016874,GO:0019217,GO:0019432,GO:0030182,GO:0030307,GO:0031957,GO:0031966,GO:0032024,GO:0032307,GO:0035336,GO:0035338,GO:0043025,GO:0043231,GO:0044233,GO:0047676,GO:0060136,GO:0060996	nucleotide binding|long-chain fatty acid metabolic process|long-chain fatty acid-CoA ligase activity|ATP binding|cytoplasm|mitochondrion|mitochondrial outer membrane|peroxisome|endoplasmic reticulum|lipid droplet|plasma membrane|lipid metabolic process|fatty acid metabolic process|lipid biosynthetic process|fatty acid transport|membrane|ligase activity|regulation of fatty acid metabolic process|t…	WP4350,WP4351,WP401,WP336,WP4346,WP1269,WP2316	Omega-3 / omega-6 fatty acid synthesis|Omega-9 fatty acid synthesis|Mitochondrial long chain fatty acid beta-oxidation|Fatty acid biosynthesis|Cholesterol metabolism with Bloch and Kandutsch-Russell pathways|Fatty acid beta-oxidation|PPAR signaling pathway	R-MMU-1430728,R-MMU-163685,R-MMU-400451,R-MMU-422356,R-MMU-434313,R-MMU-556833,R-MMU-75105,R-MMU-75876,R-MMU-8978868	Metabolism|Integration of energy metabolism|Free fatty acids regulate insulin secretion|Regulation of insulin secretion|Intracellular metabolism of fatty acids regulates insulin secretion|Metabolism of lipids|Fatty acyl-CoA biosynthesis|Synthesis of very long-chain fatty acyl-CoAs|Fatty acid metabolism
Acsl5	1760.12	1815.81	1704.43	0.938669	-0.091312	0.402907	0.882364	Down	14.3288	14.5638	14.0264	14.4955	15.1976	16.5517	433256	acyl-CoA synthetase long-chain family member 5	protein_coding	mmu00061,mmu00071,mmu04146,mmu04216,mmu04920,mmu03320,mmu04714	Fatty acid biosynthesis|Fatty acid degradation|Peroxisome|Ferroptosis|Adipocytokine signaling pathway|PPAR signaling pathway|Thermogenesis	GO:0000166,GO:0001676,GO:0004467,GO:0005524,GO:0005654,GO:0005730,GO:0005739,GO:0005741,GO:0005743,GO:0005783,GO:0005886,GO:0006629,GO:0006631,GO:0008654,GO:0010747,GO:0010867,GO:0015908,GO:0016020,GO:0016874,GO:0032000,GO:0035338,GO:0047676,GO:2001236	nucleotide binding|long-chain fatty acid metabolic process|long-chain fatty acid-CoA ligase activity|ATP binding|nucleoplasm|nucleolus|mitochondrion|mitochondrial outer membrane|mitochondrial inner membrane|endoplasmic reticulum|plasma membrane|lipid metabolic process|fatty acid metabolic process|phospholipid biosynthetic process|positive regulation of long-chain fatty acid import across plasma m…	WP336,WP1269,WP2316	Fatty acid biosynthesis|Fatty acid beta-oxidation|PPAR signaling pathway	R-MMU-1430728,R-MMU-556833,R-MMU-75105,R-MMU-75876,R-MMU-8978868	Metabolism|Metabolism of lipids|Fatty acyl-CoA biosynthesis|Synthesis of very long-chain fatty acyl-CoAs|Fatty acid metabolism
Acsm1	337.802	464.907	210.697	0.453405	-1.14113	0.00142627	0.0532709	Down	2.61753	1.98055	3.85829	5.90266	8.95711	3.74643	117147	acyl-CoA synthetase medium-chain family member 1	protein_coding	mmu00650,mmu00785	Butanoate metabolism|Lipoic acid metabolism	GO:0000166,GO:0004321,GO:0004467,GO:0005524,GO:0005525,GO:0005739,GO:0005759,GO:0006629,GO:0006631,GO:0006633,GO:0006637,GO:0015645,GO:0016874,GO:0018858,GO:0031956,GO:0046872,GO:0047760,GO:0102391	nucleotide binding|fatty-acyl-CoA synthase activity|long-chain fatty acid-CoA ligase activity|ATP binding|GTP binding|mitochondrion|mitochondrial matrix|lipid metabolic process|fatty acid metabolic process|fatty acid biosynthetic process|acyl-CoA metabolic process|fatty acid ligase activity|ligase activity|benzoate-CoA ligase activity|medium-chain fatty acid-CoA ligase activity|metal ion binding|…			R-MMU-1430728,R-MMU-156580,R-MMU-156587,R-MMU-159424,R-MMU-177135,R-MMU-177162,R-MMU-211859	Metabolism|Phase II - Conjugation of compounds|Amino Acid conjugation|Conjugation of carboxylic acids|Conjugation of benzoate with glycine|Conjugation of phenylacetate with glutamine|Biological oxidations
Acsm3	28.768	34.3542	23.1819	0.675201	-0.566611	0.20442	0.7533	Down	0.209091	0.17355	0.228784	0.23908	0.346274	0.333165	20216	acyl-CoA synthetase medium-chain family member 3	protein_coding	mmu00650	Butanoate metabolism	GO:0000166,GO:0004321,GO:0005524,GO:0005739,GO:0005759,GO:0006629,GO:0006631,GO:0006633,GO:0006637,GO:0015645,GO:0016874,GO:0018729,GO:0031956,GO:0046872,GO:0047760,GO:0050218	nucleotide binding|fatty-acyl-CoA synthase activity|ATP binding|mitochondrion|mitochondrial matrix|lipid metabolic process|fatty acid metabolic process|fatty acid biosynthetic process|acyl-CoA metabolic process|fatty acid ligase activity|ligase activity|propionate CoA-transferase activity|medium-chain fatty acid-CoA ligase activity|metal ion binding|butyrate-CoA ligase activity|propionate-CoA lig…
Acsm4	1.41655	2.10675	0.726359	0.34381	-1.54032	0.424111	0.891304	Down	0.0141525	0.0143573	0	0.0229684	0.0251528	0.0363008	233801	acyl-CoA synthetase medium-chain family member 4	protein_coding	mmu00650	Butanoate metabolism	GO:0000166,GO:0004321,GO:0005524,GO:0005739,GO:0005759,GO:0006629,GO:0006631,GO:0006633,GO:0006637,GO:0015645,GO:0016874,GO:0031956,GO:0046872,GO:0047760,GO:0102391	nucleotide binding|fatty-acyl-CoA synthase activity|ATP binding|mitochondrion|mitochondrial matrix|lipid metabolic process|fatty acid metabolic process|fatty acid biosynthetic process|acyl-CoA metabolic process|fatty acid ligase activity|ligase activity|medium-chain fatty acid-CoA ligase activity|metal ion binding|butyrate-CoA ligase activity|decanoate-CoA ligase activity			R-MMU-1430728,R-MMU-156580,R-MMU-156587,R-MMU-159424,R-MMU-177128,R-MMU-211859,R-MMU-9748784,R-MMU-9749641	Metabolism|Phase II - Conjugation of compounds|Amino Acid conjugation|Conjugation of carboxylic acids|Conjugation of salicylate with glycine|Biological oxidations|Drug ADME|Aspirin ADME
Acss1	815.926	694.119	937.734	1.35147	0.434525	0.0706307	0.504714	Up	6.72152	5.90334	9.33853	4.89993	6.79734	4.63642	68738	acyl-CoA synthetase short-chain family member 1	protein_coding	mmu00010,mmu00620,mmu00630,mmu00640	Glycolysis / Gluconeogenesis|Pyruvate metabolism|Glyoxylate and dicarboxylate metabolism|Propanoate metabolism	GO:0000166,GO:0003987,GO:0005524,GO:0005739,GO:0005759,GO:0006085,GO:0006629,GO:0016208,GO:0016874,GO:0019413,GO:0019427,GO:0019542,GO:0050218	nucleotide binding|acetate-CoA ligase activity|ATP binding|mitochondrion|mitochondrial matrix|acetyl-CoA biosynthetic process|lipid metabolic process|AMP binding|ligase activity|acetate biosynthetic process|acetyl-CoA biosynthetic process from acetate|propionate biosynthetic process|propionate-CoA ligase activity	WP662	Amino acid metabolism	R-MMU-1430728,R-MMU-211859,R-MMU-211945,R-MMU-71384	Metabolism|Biological oxidations|Phase I - Functionalization of compounds|Ethanol oxidation
Acss2	407.842	444.642	371.042	0.834041	-0.261809	0.404768	0.883701	Down	3.97953	3.30608	3.7865	2.74921	3.45033	7.51303	60525	acyl-CoA synthetase short-chain family member 2	protein_coding	mmu00010,mmu00620,mmu00630,mmu00640	Glycolysis / Gluconeogenesis|Pyruvate metabolism|Glyoxylate and dicarboxylate metabolism|Propanoate metabolism	GO:0000166,GO:0003987,GO:0005524,GO:0005737,GO:0005829,GO:0006085,GO:0006629,GO:0008610,GO:0016874,GO:0019413,GO:0019542,GO:0050218	nucleotide binding|acetate-CoA ligase activity|ATP binding|cytoplasm|cytosol|acetyl-CoA biosynthetic process|lipid metabolic process|lipid biosynthetic process|ligase activity|acetate biosynthetic process|propionate biosynthetic process|propionate-CoA ligase activity	WP336,WP1269,WP1252	Fatty acid biosynthesis|Fatty acid beta-oxidation|Amino acid conjugation of benzoic acid	R-MMU-1430728,R-MMU-1592230,R-MMU-1852241,R-MMU-211859,R-MMU-211945,R-MMU-2151201,R-MMU-71384	Metabolism|Mitochondrial biogenesis|Organelle biogenesis and maintenance|Biological oxidations|Phase I - Functionalization of compounds|Transcriptional activation of mitochondrial biogenesis|Ethanol oxidation
Acss3	19.5837	20.0379	19.1296	0.955627	-0.065481	0.912234	0.990571	Down	0.0582809	0.085999	0.138168	0.133279	0.0847479	0.0770096	380660	acyl-CoA synthetase short-chain family member 3	protein_coding	mmu00640	Propanoate metabolism	GO:0000166,GO:0003674,GO:0003987,GO:0005524,GO:0005739,GO:0005759,GO:0006629,GO:0008150,GO:0016874,GO:0043231,GO:0047760,GO:0050218	nucleotide binding|molecular_function|acetate-CoA ligase activity|ATP binding|mitochondrion|mitochondrial matrix|lipid metabolic process|biological_process|ligase activity|intracellular membrane-bounded organelle|butyrate-CoA ligase activity|propionate-CoA ligase activity			R-MMU-1430728,R-MMU-556833,R-MMU-74182,R-MMU-77111	Metabolism|Metabolism of lipids|Ketone body metabolism|Synthesis of Ketone Bodies
Acta1	166.397	133.523	199.27	1.49367	0.57886	0.157621	0.700354	Up	1.59043	3.56139	5.64156	1.96733	3.08515	2.18896	11459	actin alpha 1%2C skeletal muscle	protein_coding	mmu04814	Motor proteins	GO:0000166,GO:0001725,GO:0005515,GO:0005524,GO:0005737,GO:0005856,GO:0005865,GO:0005884,GO:0015629,GO:0016787,GO:0030017,GO:0030240,GO:0032991,GO:0048741	nucleotide binding|stress fiber|protein binding|ATP binding|cytoplasm|cytoskeleton|striated muscle thin filament|actin filament|actin cytoskeleton|hydrolase activity|sarcomere|skeletal muscle thin filament assembly|protein-containing complex|skeletal muscle fiber development	WP385,WP5056,WP5242	Myometrial relaxation and contraction pathways|Burn wound healing|Comprehensive IL-17A signaling	R-MMU-390522,R-MMU-397014	Striated Muscle Contraction|Muscle contraction
Acta2	4827.16	4987.79	4666.53	0.935625	-0.0959982	0.59576	0.938657	Down	40.3511	48.2757	50.9649	58.6117	47.9245	42.9847	11475	actin alpha 2%2C smooth muscle%2C aorta	protein_coding	mmu04371,mmu04814,mmu04926,mmu04270	Apelin signaling pathway|Motor proteins|Relaxin signaling pathway|Vascular smooth muscle contraction	GO:0000166,GO:0001725,GO:0005515,GO:0005524,GO:0005604,GO:0005737,GO:0005856,GO:0006936,GO:0008217,GO:0014829,GO:0015629,GO:0016787,GO:0019901,GO:0030485,GO:0031514,GO:0061870,GO:0061874,GO:0070374,GO:2000491	nucleotide binding|stress fiber|protein binding|ATP binding|basement membrane|cytoplasm|cytoskeleton|muscle contraction|regulation of blood pressure|vascular associated smooth muscle contraction|actin cytoskeleton|hydrolase activity|protein kinase binding|smooth muscle contractile fiber|motile cilium|positive regulation of hepatic stellate cell migration|positive regulation of hepatic stellate ce…	WP5242	Comprehensive IL-17A signaling	R-MMU-397014,R-MMU-445355	Muscle contraction|Smooth Muscle Contraction
Actb	45919.2	46585.5	45252.9	0.971401	-0.0418609	0.822633	0.981214	Down	654.874	618.982	720.795	721.816	785.993	550.509	11461	actin%2C beta	protein_coding	mmu03082,mmu04015,mmu04390,mmu04145,mmu04210,mmu04510,mmu04520,mmu04530,mmu04814,mmu04810,mmu04611,mmu04613,mmu04670,mmu04921,mmu04919,mmu04971,mmu04714,mmu05205,mmu05225,mmu05164,mmu05132,mmu05135,mmu05100,mmu05014,mmu05418,mmu05410,mmu05412,mmu05414,mmu05416	ATP-dependent chromatin remodeling|Rap1 signaling pathway|Hippo signaling pathway|Phagosome|Apoptosis|Focal adhesion|Adherens junction|Tight junction|Motor proteins|Regulation of actin cytoskeleton|Platelet activation|Neutrophil extracellular trap formation|Leukocyte transendothelial migration|Oxytocin signaling pathway|Thyroid hormone signaling pathway|Gastric acid secretion|Thermogenesis|Proteo…	GO:0000079,GO:0000166,GO:0000776,GO:0000785,GO:0000786,GO:0001725,GO:0001738,GO:0002102,GO:0005515,GO:0005524,GO:0005634,GO:0005737,GO:0005829,GO:0005856,GO:0005884,GO:0005903,GO:0005911,GO:0005912,GO:0006338,GO:0006357,GO:0007163,GO:0007409,GO:0008284,GO:0015629,GO:0016020,GO:0016363,GO:0016514,GO:0016586,GO:0016787,GO:0019894,GO:0019901,GO:0022898,GO:0030027,GO:0030071,GO:0030424,GO:0030863,GO:…	regulation of cyclin-dependent protein serine/threonine kinase activity|nucleotide binding|kinetochore|chromatin|nucleosome|stress fiber|morphogenesis of a polarized epithelium|podosome|protein binding|ATP binding|nucleus|cytoplasm|cytosol|cytoskeleton|actin filament|brush border|cell-cell junction|adherens junction|chromatin remodeling|regulation of transcription by RNA polymerase II|establishme…	WP523,WP85,WP385	Regulation of actin cytoskeleton|Focal adhesion|Myometrial relaxation and contraction pathways	R-MMU-1266738,R-MMU-1500931,R-MMU-157858,R-MMU-162582,R-MMU-168249,R-MMU-168256,R-MMU-190828,R-MMU-190873,R-MMU-194138,R-MMU-194315,R-MMU-195258,R-MMU-196025,R-MMU-199991,R-MMU-2029480,R-MMU-2029482,R-MMU-2682334,R-MMU-373760,R-MMU-3928662,R-MMU-418990,R-MMU-421270,R-MMU-422475,R-MMU-437239,R-MMU-4420097,R-MMU-445095,R-MMU-446353,R-MMU-446728,R-MMU-5626467,R-MMU-5653656,R-MMU-5663213,R-MMU-566322…	Developmental Biology|Cell-Cell communication|Gap junction trafficking and regulation|Signal Transduction|Innate Immune System|Immune System|Gap junction trafficking|Gap junction degradation|Signaling by VEGF|Signaling by Rho GTPases|RHO GTPase Effectors|Formation of annular gap junctions|Membrane Trafficking|Fcgamma receptor (FCGR) dependent phagocytosis|Regulation of actin dynamics for phagocyt…
Actc1	218.216	184.811	251.621	1.36151	0.445206	0.223485	0.771666	Up	2.94067	7.25706	4.47653	5.04325	2.57611	3.12052	11464	actin%2C alpha%2C cardiac muscle 1	protein_coding	mmu04814,mmu04260,mmu04261,mmu05410,mmu05414	Motor proteins|Cardiac muscle contraction|Adrenergic signaling in cardiomyocytes|Hypertrophic cardiomyopathy|Dilated cardiomyopathy	GO:0000146,GO:0000166,GO:0005515,GO:0005524,GO:0005737,GO:0005856,GO:0005884,GO:0007015,GO:0016787,GO:0017022,GO:0030017,GO:0030048,GO:0030240,GO:0031032,GO:0031674,GO:0033275,GO:0043066,GO:0045202,GO:0055003,GO:0055008,GO:0060047,GO:0060048,GO:0070252,GO:0098978	microfilament motor activity|nucleotide binding|protein binding|ATP binding|cytoplasm|cytoskeleton|actin filament|actin filament organization|hydrolase activity|myosin binding|sarcomere|actin filament-based movement|skeletal muscle thin filament assembly|actomyosin structure organization|I band|actin-myosin filament sliding|negative regulation of apoptotic process|synapse|cardiac myofibril assemb…	WP385	Myometrial relaxation and contraction pathways	R-MMU-162582,R-MMU-194315,R-MMU-390522,R-MMU-397014,R-MMU-8980692,R-MMU-9012999,R-MMU-9013026,R-MMU-9716542	Signal Transduction|Signaling by Rho GTPases|Striated Muscle Contraction|Muscle contraction|RHOA GTPase cycle|RHO GTPase cycle|RHOB GTPase cycle|Signaling by Rho GTPases, Miro GTPases and RHOBTB3
Actg1	39124.7	41103	37146.5	0.90375	-0.146005	0.345711	0.848824	Down	536.905	501.734	570.829	598.741	661.437	530.576	11465	actin%2C gamma%2C cytoplasmic 1	protein_coding	mmu03082,mmu04015,mmu04390,mmu04145,mmu04210,mmu04510,mmu04520,mmu04530,mmu04814,mmu04810,mmu04611,mmu04613,mmu04670,mmu04921,mmu04919,mmu04971,mmu04714,mmu05205,mmu05225,mmu05164,mmu05132,mmu05135,mmu05100,mmu05014,mmu05418,mmu05410,mmu05412,mmu05414,mmu05416	ATP-dependent chromatin remodeling|Rap1 signaling pathway|Hippo signaling pathway|Phagosome|Apoptosis|Focal adhesion|Adherens junction|Tight junction|Motor proteins|Regulation of actin cytoskeleton|Platelet activation|Neutrophil extracellular trap formation|Leukocyte transendothelial migration|Oxytocin signaling pathway|Thyroid hormone signaling pathway|Gastric acid secretion|Thermogenesis|Proteo…	GO:0000166,GO:0001525,GO:0001738,GO:0005200,GO:0005515,GO:0005522,GO:0005524,GO:0005737,GO:0005829,GO:0005856,GO:0005884,GO:0005911,GO:0007409,GO:0010628,GO:0015629,GO:0016020,GO:0016787,GO:0019901,GO:0030016,GO:0030335,GO:0030424,GO:0031625,GO:0031941,GO:0035267,GO:0042802,GO:0043034,GO:0043209,GO:0043296,GO:0044305,GO:0045177,GO:0045202,GO:0045214,GO:0045335,GO:0048870,GO:0051492,GO:0051893,GO:…	nucleotide binding|angiogenesis|morphogenesis of a polarized epithelium|structural constituent of cytoskeleton|protein binding|profilin binding|ATP binding|cytoplasm|cytosol|cytoskeleton|actin filament|cell-cell junction|axonogenesis|positive regulation of gene expression|actin cytoskeleton|membrane|hydrolase activity|protein kinase binding|myofibril|positive regulation of cell migration|axon|ubi…	WP523,WP85,WP385	Regulation of actin cytoskeleton|Focal adhesion|Myometrial relaxation and contraction pathways	R-MMU-109582,R-MMU-114608,R-MMU-1266738,R-MMU-1500931,R-MMU-157858,R-MMU-162582,R-MMU-168249,R-MMU-168256,R-MMU-190828,R-MMU-190873,R-MMU-194138,R-MMU-194315,R-MMU-195258,R-MMU-196025,R-MMU-199991,R-MMU-2029480,R-MMU-2029482,R-MMU-212165,R-MMU-2682334,R-MMU-373760,R-MMU-392499,R-MMU-3928662,R-MMU-418990,R-MMU-421270,R-MMU-422475,R-MMU-437239,R-MMU-4420097,R-MMU-445095,R-MMU-446353,R-MMU-446728,R-…	Hemostasis|Platelet degranulation |Developmental Biology|Cell-Cell communication|Gap junction trafficking and regulation|Signal Transduction|Innate Immune System|Immune System|Gap junction trafficking|Gap junction degradation|Signaling by VEGF|Signaling by Rho GTPases|RHO GTPase Effectors|Formation of annular gap junctions|Membrane Trafficking|Fcgamma receptor (FCGR) dependent phagocytosis|Regula…
Actg2	1220.08	1228.08	1212.09	0.987152	-0.0186555	0.938415	0.993491	Down	21.642	23.0836	33.3738	29.915	29.0743	20.1085	11468	actin%2C gamma 2%2C smooth muscle%2C enteric	protein_coding	mmu04814,mmu04270	Motor proteins|Vascular smooth muscle contraction	GO:0000166,GO:0005524,GO:0005737,GO:0005856,GO:0016787,GO:0071944	nucleotide binding|ATP binding|cytoplasm|cytoskeleton|hydrolase activity|cell periphery			R-MMU-397014,R-MMU-445355	Muscle contraction|Smooth Muscle Contraction
Actl6a	1283.27	1427.24	1139.29	0.798266	-0.325059	0.0116566	0.196846	Down	13.2708	12.7228	14.5043	15.5352	17.2173	18.6007	56456	actin-like 6A	protein_coding	mmu03082,mmu04714,mmu05225	ATP-dependent chromatin remodeling|Thermogenesis|Hepatocellular carcinoma	GO:0000723,GO:0000776,GO:0000785,GO:0000786,GO:0001825,GO:0003682,GO:0005515,GO:0005634,GO:0005654,GO:0005886,GO:0006275,GO:0006281,GO:0006282,GO:0006310,GO:0006325,GO:0006338,GO:0006355,GO:0006357,GO:0006974,GO:0007399,GO:0008284,GO:0016363,GO:0016514,GO:0016586,GO:0030071,GO:0031011,GO:0033044,GO:0035060,GO:0035267,GO:0042981,GO:0043967,GO:0045582,GO:0045596,GO:0045597,GO:0045663,GO:0045739,GO:…	telomere maintenance|kinetochore|chromatin|nucleosome|blastocyst formation|chromatin binding|protein binding|nucleus|nucleoplasm|plasma membrane|regulation of DNA replication|DNA repair|regulation of DNA repair|DNA recombination|chromatin organization|chromatin remodeling|regulation of DNA-templated transcription|regulation of transcription by RNA polymerase II|DNA damage response|nervous system …			R-MMU-212436,R-MMU-3214858,R-MMU-3247509,R-MMU-392499,R-MMU-4839726,R-MMU-5688426,R-MMU-5689603,R-MMU-5696394,R-MMU-5696398,R-MMU-5696399,R-MMU-597592,R-MMU-73857,R-MMU-73894,R-MMU-74160,R-MMU-8878171,R-MMU-8939243	Generic Transcription Pathway|RMTs methylate histone arginines|Chromatin modifying enzymes|Metabolism of proteins|Chromatin organization|Deubiquitination|UCH proteinases|DNA Damage Recognition in GG-NER|Nucleotide Excision Repair|Global Genome Nucleotide Excision Repair (GG-NER)|Post-translational protein modification|RNA Polymerase II Transcription|DNA Repair|Gene expression (Transcription)|Tran…
[truncated: 18,838 more rows]
